# Supplementary material for: Differential gene expression in a tripartite interaction:Drosophila,Spiroplasmaand parasitic wasps
Source: PeerJ journal article supplement (doi:10.7717/peerj.11020), 2021-03-04

## Generalized Regression for Value

| Model Comparison                    |                       |                        |                   |                    |           |           |           |
|-------------------------------------|-----------------------|------------------------|-------------------|--------------------|-----------|-----------|-----------|
| Show                                | Response Distribution | Estimation Method      | Validation Method | Nonzero Parameters | AICc      | BIC       | R-Square  |
| <input checked="" type="checkbox"/> | Normal                | Standard Least Squares | None              | 37                 | 130.44475 | 189.51217 | 0.9953923 |

### Model Launch

Response Distribution  
 ▼

Estimation Method  
 ▼  
 Adaptive

Validation Method  
 ▼  
 Early Stopping

## Standard Least Squares

### Model Summary

|                      |                        |
|----------------------|------------------------|
| Response             | Value                  |
| Distribution         | Normal                 |
| Estimation Method    | Standard Least Squares |
| Validation Method    | None                   |
| Mean Model Link      | Identity               |
| Scale Model Link     | Identity               |
| <b>Measure</b>       |                        |
| Number of rows       | 108                    |
| Sum of Frequencies   | 108                    |
| -LogLikelihood       | 8.1366596              |
| Number of Parameters | 37                     |
| BIC                  | 189.51217              |
| AICc                 | 130.44475              |
| RSquare              | 0.9953923              |

**Generalized Regression for Value****Standard Least Squares****Model Summary****Measure**

|             |           |
|-------------|-----------|
| RSquare Adj | 0.9931524 |
| RASE        | 0.260905  |

**Parameter Estimates for Original Predictors**

| Term                                                                       | Estimate  | Std Error | Wald<br>ChiSquare | Prob ><br>ChiSquare | Lower 95% | Upper 95% |
|----------------------------------------------------------------------------|-----------|-----------|-------------------|---------------------|-----------|-----------|
| Intercept                                                                  | -0.506486 | 0.1844877 | 7.5370306         | 0.0060*             | -0.868075 | -0.144897 |
| Treatment[Gh-no_wasp]*Strain[Brazil-Uganda]*RIP[RIP1-RIP3_5]*Time[24h-72h] | 2.6652302 | 0.7379507 | 13.044121         | 0.0003*             | 1.2188735 | 4.1115869 |
| Treatment[Gh-no_wasp]*Strain[Brazil-Uganda]*RIP[RIP2-RIP3_5]*Time[24h-72h] | 4.68575   | 0.7379507 | 40.318427         | <.0001*             | 3.2393933 | 6.1321067 |
| Treatment[Lh-no_wasp]*Strain[Brazil-Uganda]*RIP[RIP1-RIP3_5]*Time[24h-72h] | 1.0994482 | 0.7379507 | 2.219703          | 0.1363              | -0.346909 | 2.5458049 |
| Treatment[Lh-no_wasp]*Strain[Brazil-Uganda]*RIP[RIP2-RIP3_5]*Time[24h-72h] | 2.8613131 | 0.7379507 | 15.034055         | 0.0001*             | 1.4149564 | 4.3076698 |
| Strain[Brazil-Uganda]*RIP[RIP1-RIP3_5]*Time[24h-72h]                       | -1.951067 | 0.5218099 | 13.980409         | 0.0002*             | -2.973796 | -0.928339 |
| Strain[Brazil-Uganda]*RIP[RIP2-RIP3_5]*Time[24h-72h]                       | -3.270031 | 0.5218099 | 39.271655         | <.0001*             | -4.29276  | -2.247303 |
| Treatment[Gh-no_wasp]*Strain[Brazil-Uganda]*RIP[RIP1-RIP3_5]               | -1.971147 | 0.5218099 | 14.269645         | 0.0002*             | -2.993875 | -0.948418 |
| Treatment[Gh-no_wasp]*Strain[Brazil-Uganda]*RIP[RIP2-RIP3_5]               | -4.160043 | 0.5218099 | 63.558113         | <.0001*             | -5.182772 | -3.137314 |
| Treatment[Lh-no_wasp]*Strain[Brazil-Uganda]*RIP[RIP1-RIP3_5]               | -0.878931 | 0.5218099 | 2.8371693         | 0.0921              | -1.90166  | 0.1437973 |
| Treatment[Lh-no_wasp]*Strain[Brazil-Uganda]*RIP[RIP2-RIP3_5]               | -2.308038 | 0.5218099 | 19.564171         | <.0001*             | -3.330767 | -1.28531  |
| Treatment[Gh-no_wasp]*Strain[Brazil-Uganda]*Time[24h-72h]                  | -3.397517 | 0.5218099 | 42.393432         | <.0001*             | -4.420245 | -2.374788 |
| Treatment[Lh-no_wasp]*Strain[Brazil-Uganda]*Time[24h-72h]                  | -1.664815 | 0.5218099 | 10.179057         | 0.0014*             | -2.687544 | -0.642087 |
| Treatment[Gh-no_wasp]*RIP[RIP1-RIP3_5]*Time[24h-72h]                       | -0.877172 | 0.5218099 | 2.8258224         | 0.0928              | -1.899901 | 0.1455566 |
| Treatment[Gh-no_wasp]*RIP[RIP2-RIP3_5]*Time[24h-72h]                       | -2.154512 | 0.5218099 | 17.047994         | <.0001*             | -3.177241 | -1.131784 |
| Treatment[Lh-no_wasp]*RIP[RIP1-RIP3_5]*Time[24h-72h]                       | -0.427684 | 0.5218099 | 0.6717719         | 0.4124              | -1.450413 | 0.5950444 |
| Treatment[Lh-no_wasp]*RIP[RIP2-RIP3_5]*Time[24h-72h]                       | -1.669579 | 0.5218099 | 10.237393         | 0.0014*             | -2.692308 | -0.646851 |
| Treatment[Gh-no_wasp]                                                      | -2.153584 | 0.260905  | 68.133231         | <.0001*             | -2.664948 | -1.64222  |
| Treatment[Lh-no_wasp]                                                      | -1.169513 | 0.260905  | 20.093041         | <.0001*             | -1.680878 | -0.658149 |
| Strain[Brazil-Uganda]                                                      | -0.067589 | 0.260905  | 0.067111          | 0.7956              | -0.578954 | 0.4437748 |
| RIP[RIP1-RIP3_5]                                                           | -1.342449 | 0.260905  | 26.474712         | <.0001*             | -1.853814 | -0.831085 |
| RIP[RIP2-RIP3_5]                                                           | 5.4237771 | 0.260905  | 432.15447         | <.0001*             | 4.9124128 | 5.9351414 |
| Time[24h-72h]                                                              | -1.827899 | 0.260905  | 49.083986         | <.0001*             | -2.339264 | -1.316535 |
| Treatment[Gh-no_wasp]*Strain[Brazil-Uganda]                                | 2.8307118 | 0.3689753 | 58.856802         | <.0001*             | 2.1075335 | 3.5538902 |
| Treatment[Lh-no_wasp]*Strain[Brazil-Uganda]                                | 1.2056423 | 0.3689753 | 10.676829         | 0.0011*             | 0.4824639 | 1.9288206 |
| Treatment[Gh-no_wasp]*RIP[RIP1-RIP3_5]                                     | 0.86877   | 0.3689753 | 5.5438954         | 0.0185*             | 0.1455917 | 1.5919484 |
| Treatment[Gh-no_wasp]*RIP[RIP2-RIP3_5]                                     | 3.1092383 | 0.3689753 | 71.008996         | <.0001*             | 2.38606   | 3.8324167 |
| Treatment[Lh-no_wasp]*RIP[RIP1-RIP3_5]                                     | 0.160114  | 0.3689753 | 0.1883058         | 0.6643              | -0.563064 | 0.8832923 |

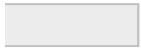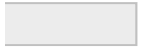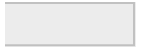

**Generalized Regression for Value****Standard Least Squares****Parameter Estimates for Original Predictors**

| Term                                   | Estimate        | Std Error        | Wald<br>ChiSquare | Prob ><br>ChiSquare | Lower 95%        | Upper 95%        |
|----------------------------------------|-----------------|------------------|-------------------|---------------------|------------------|------------------|
| Treatment[Lh-no_wasp]*RIP[RIP2-RIP3_5] | 2.0243669       | 0.3689753        | 30.101201         | <.0001*             | 1.3011886        | 2.7475453        |
| Treatment[Gh-no_wasp]*Time[24h-72h]    | 1.053851        | 0.3689753        | 8.1576259         | 0.0043*             | 0.3306727        | 1.7770294        |
| Treatment[Lh-no_wasp]*Time[24h-72h]    | 0.629072        | 0.3689753        | 2.9067394         | 0.0882              | -0.094106        | 1.3522504        |
| Strain[Brazil-Uganda]*RIP[RIP1-RIP3_5] | -0.410005       | 0.3689753        | 1.2347637         | 0.2665              | -1.133183        | 0.3131733        |
| Strain[Brazil-Uganda]*RIP[RIP2-RIP3_5] | 1.441441        | 0.3689753        | 15.261566         | <.0001*             | 0.7182627        | 2.1646194        |
| Strain[Brazil-Uganda]*Time[24h-72h]    | 2.2972192       | 0.3689753        | 38.762361         | <.0001*             | 1.5740408        | 3.0203975        |
| RIP[RIP1-RIP3_5]*Time[24h-72h]         | 1.3459961       | 0.3689753        | 13.307391         | 0.0003*             | 0.6228177        | 2.0691744        |
| RIP[RIP2-RIP3_5]*Time[24h-72h]         | 2.4779155       | 0.3689753        | 45.100184         | <.0001*             | 1.7547371        | 3.2010938        |
| <b>Normal Distribution</b>             |                 |                  | <b>Wald</b>       | <b>Prob &gt;</b>    |                  |                  |
| <b>Parameters</b>                      | <b>Estimate</b> | <b>Std Error</b> | <b>ChiSquare</b>  | <b>ChiSquare</b>    | <b>Lower 95%</b> | <b>Upper 95%</b> |
| Scale                                  | 0.319542        | 0.0307479        | 108               | <.0001*             | 0.2592771        | 0.3798069        |

**Effect Tests**

| Source                    | Nparm | DF | Sum of<br>Squares | F Ratio   | Prob > F |
|---------------------------|-------|----|-------------------|-----------|----------|
| RIP                       | 2     | 2  | 77.00135          | 377.06171 | <.0001*  |
| Treatment*RIP             | 4     | 4  | 8.2872123         | 20.290491 | <.0001*  |
| Treatment                 | 2     | 2  | 6.9740807         | 34.150814 | <.0001*  |
| Treatment*Strain          | 2     | 2  | 6.0536768         | 29.643762 | <.0001*  |
| Time                      | 1     | 1  | 5.0118232         | 49.083986 | <.0001*  |
| Treatment*Strain*RIP      | 4     | 4  | 6.5541147         | 16.047158 | <.0001*  |
| RIP*Time                  | 2     | 2  | 4.616506          | 22.606196 | <.0001*  |
| Strain*Time               | 1     | 1  | 3.957912          | 38.762361 | <.0001*  |
| Treatment*Strain*Time     | 2     | 2  | 4.3292462         | 21.199537 | <.0001*  |
| Strain*RIP*Time           | 2     | 2  | 4.0598589         | 19.880396 | <.0001*  |
| Treatment*Strain*RIP*Time | 4     | 4  | 4.2907848         | 10.505599 | <.0001*  |
| Strain*RIP                | 2     | 2  | 2.8368545         | 13.891564 | <.0001*  |
| Treatment*RIP*Time        | 4     | 4  | 1.9990198         | 4.8944195 | 0.0015*  |
| Treatment*Time            | 2     | 2  | 0.8433854         | 4.1299059 | 0.0200*  |
| Strain                    | 1     | 1  | 0.0068525         | 0.067111  | 0.7963   |

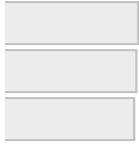

### Generalized Regression for Value

#### Standard Least Squares

#### Diagnostic Bundle

##### Residual by Predicted Plot

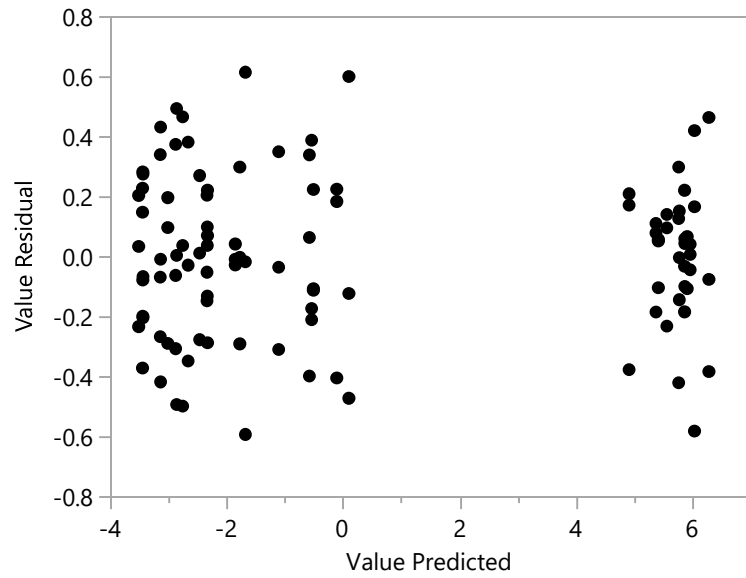

##### Histogram of Residuals

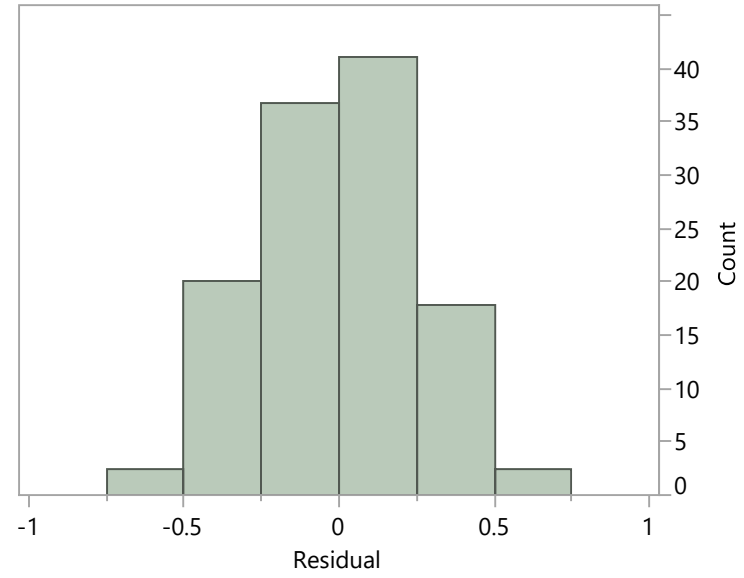

### Generalized Regression for Value

#### Standard Least Squares

#### Diagnostic Bundle

##### Residual by Row Plot

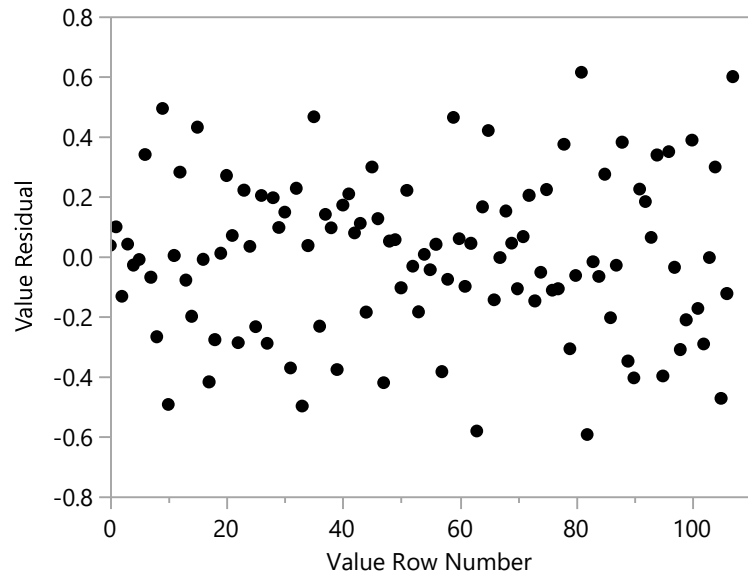

##### Fitted Probability of Observing a Larger Response

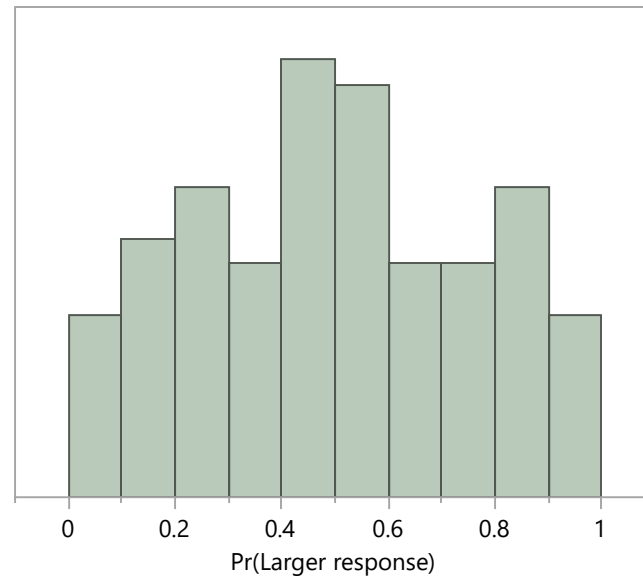

**Generalized Regression for Value**

**Standard Least Squares**

**Normal Quantile Plot**

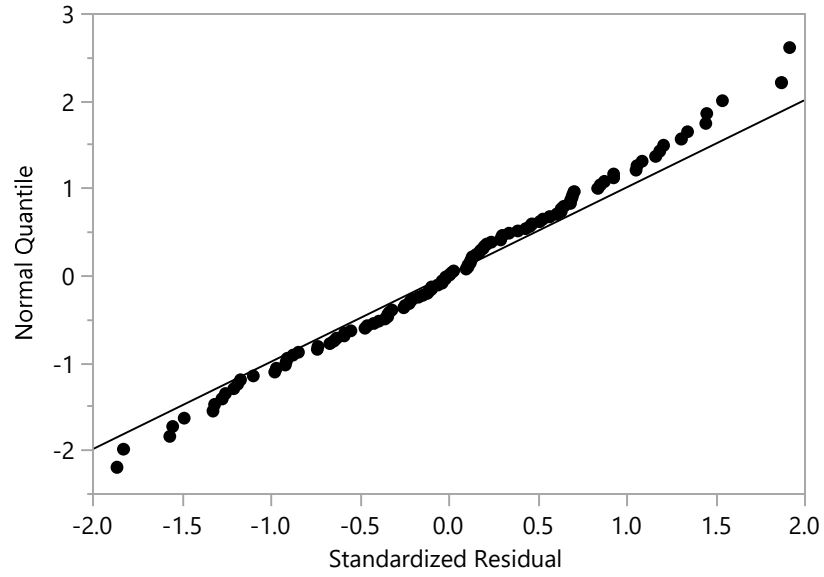



**Generalized Regression for Value****Standard Least Squares****Multiple Comparisons for Treatment\*Strain\*RIP\*Time****Least Squares Means Estimates**

| Treatment | Strain | RIP    | Time | Estimate  | Std Error  | DF | Lower 95% | Upper 95% |
|-----------|--------|--------|------|-----------|------------|----|-----------|-----------|
| Gh        | Brazil | RIP1   | 24h  | -3.443138 | 0.18448766 | 72 | -3.810907 | -3.075368 |
| Gh        | Brazil | RIP1   | 72h  | -2.751779 | 0.18448766 | 72 | -3.119548 | -2.384009 |
| Gh        | Brazil | RIP2   | 24h  | 5.782242  | 0.18448766 | 72 | 5.414472  | 6.150011  |
| Gh        | Brazil | RIP2   | 72h  | 5.917466  | 0.18448766 | 72 | 5.549696  | 6.285235  |
| Gh        | Brazil | RIP3_5 | 24h  | -1.771293 | 0.18448766 | 72 | -2.139063 | -1.403524 |
| Gh        | Brazil | RIP3_5 | 72h  | 0.103052  | 0.18448766 | 72 | -0.264717 | 0.470822  |
| Gh        | Uganda | RIP1   | 24h  | -3.438974 | 0.18448766 | 72 | -3.806743 | -3.071204 |
| Gh        | Uganda | RIP1   | 72h  | -3.133749 | 0.18448766 | 72 | -3.501519 | -2.765980 |
| Gh        | Uganda | RIP2   | 24h  | 5.422300  | 0.18448766 | 72 | 5.054531  | 5.790070  |
| Gh        | Uganda | RIP2   | 72h  | 5.872945  | 0.18448766 | 72 | 5.505176  | 6.240715  |
| Gh        | Uganda | RIP3_5 | 24h  | -3.434118 | 0.18448766 | 72 | -3.801888 | -3.066349 |
| Gh        | Uganda | RIP3_5 | 72h  | -2.660070 | 0.18448766 | 72 | -3.027839 | -2.292301 |
| Lh        | Brazil | RIP1   | 24h  | -3.508949 | 0.18448766 | 72 | -3.876719 | -3.141180 |
| Lh        | Brazil | RIP1   | 72h  | -3.009218 | 0.18448766 | 72 | -3.376988 | -2.641449 |
| Lh        | Brazil | RIP2   | 24h  | 5.876795  | 0.18448766 | 72 | 5.509025  | 6.244564  |
| Lh        | Brazil | RIP2   | 72h  | 6.043600  | 0.18448766 | 72 | 5.675831  | 6.411369  |
| Lh        | Brazil | RIP3_5 | 24h  | -1.104370 | 0.18448766 | 72 | -1.472139 | -0.736601 |
| Lh        | Brazil | RIP3_5 | 72h  | -0.537947 | 0.18448766 | 72 | -0.905716 | -0.170177 |
| Lh        | Uganda | RIP1   | 24h  | -3.138850 | 0.18448766 | 72 | -3.506620 | -2.771081 |
| Lh        | Uganda | RIP1   | 72h  | -2.858335 | 0.18448766 | 72 | -3.226104 | -2.490565 |
| Lh        | Uganda | RIP2   | 24h  | 5.381654  | 0.18448766 | 72 | 5.013884  | 5.749423  |
| Lh        | Uganda | RIP2   | 72h  | 5.772145  | 0.18448766 | 72 | 5.404375  | 6.139914  |
| Lh        | Uganda | RIP3_5 | 24h  | -2.874826 | 0.18448766 | 72 | -3.242596 | -2.507057 |
| Lh        | Uganda | RIP3_5 | 72h  | -1.675999 | 0.18448766 | 72 | -2.043769 | -1.308230 |
| no_wasp   | Brazil | RIP1   | 24h  | -2.462281 | 0.18448766 | 72 | -2.830051 | -2.094512 |
| no_wasp   | Brazil | RIP1   | 72h  | -2.326530 | 0.18448766 | 72 | -2.694299 | -1.958761 |
| no_wasp   | Brazil | RIP2   | 24h  | 5.968347  | 0.18448766 | 72 | 5.600577  | 6.336116  |
| no_wasp   | Brazil | RIP2   | 72h  | 6.291143  | 0.18448766 | 72 | 5.923373  | 6.658912  |
| no_wasp   | Brazil | RIP3_5 | 24h  | -0.104756 | 0.18448766 | 72 | -0.472525 | 0.263014  |
| no_wasp   | Brazil | RIP3_5 | 72h  | -0.574076 | 0.18448766 | 72 | -0.941845 | -0.206306 |
| no_wasp   | Uganda | RIP1   | 24h  | -2.330839 | 0.18448766 | 72 | -2.698608 | -1.963069 |
| no_wasp   | Uganda | RIP1   | 72h  | -1.848935 | 0.18448766 | 72 | -2.216705 | -1.481166 |

**Generalized Regression for Value**

**Standard Least Squares**

**Multiple Comparisons for Treatment\*Strain\*RIP\*Time**

**Least Squares Means Estimates**

| Treatment | Strain | RIP    | Time | Estimate  | Std Error  | DF | Lower 95% | Upper 95% |
|-----------|--------|--------|------|-----------|------------|----|-----------|-----------|
| no_wasp   | Uganda | RIP2   | 24h  | 5.567307  | 0.18448766 | 72 | 5.199538  | 5.935077  |
| no_wasp   | Uganda | RIP2   | 72h  | 4.917291  | 0.18448766 | 72 | 4.549522  | 5.285060  |
| no_wasp   | Uganda | RIP3_5 | 24h  | -2.334385 | 0.18448766 | 72 | -2.702155 | -1.966616 |
| no_wasp   | Uganda | RIP3_5 | 72h  | -0.506486 | 0.18448766 | 72 | -0.874255 | -0.138717 |

**Tukey HSD All Pairwise Comparisons**

Quantile = 4.00311, Adjusted DF = 72.0, Adjustment = Tukey

**All Pairwise Differences**

| Treatment | Strain | RIP  | Time | -Treatment | -Strain | -RIP   | -Time | Difference | Std Error | t Ratio | Prob> t | Lower 95% | Upper 95% |
|-----------|--------|------|------|------------|---------|--------|-------|------------|-----------|---------|---------|-----------|-----------|
| Gh        | Brazil | RIP1 | 24h  | Gh         | Brazil  | RIP1   | 72h   | -0.69136   | 0.2609050 | -2.65   | 0.7424  | -1.7358   | 0.3531    |
| Gh        | Brazil | RIP1 | 24h  | Gh         | Brazil  | RIP2   | 24h   | -9.22538   | 0.2609050 | -35.36  | <.0001* | -10.2698  | -8.1809   |
| Gh        | Brazil | RIP1 | 24h  | Gh         | Brazil  | RIP2   | 72h   | -9.36060   | 0.2609050 | -35.88  | <.0001* | -10.4050  | -8.3162   |
| Gh        | Brazil | RIP1 | 24h  | Gh         | Brazil  | RIP3_5 | 24h   | -1.67184   | 0.2609050 | -6.41   | <.0001* | -2.7163   | -0.6274   |
| Gh        | Brazil | RIP1 | 24h  | Gh         | Brazil  | RIP3_5 | 72h   | -3.54619   | 0.2609050 | -13.59  | <.0001* | -4.5906   | -2.5018   |
| Gh        | Brazil | RIP1 | 24h  | Gh         | Uganda  | RIP1   | 24h   | -0.00416   | 0.2609050 | -0.02   | 1.0000  | -1.0486   | 1.0403    |
| Gh        | Brazil | RIP1 | 24h  | Gh         | Uganda  | RIP1   | 72h   | -0.30939   | 0.2609050 | -1.19   | 1.0000  | -1.3538   | 0.7350    |
| Gh        | Brazil | RIP1 | 24h  | Gh         | Uganda  | RIP2   | 24h   | -8.86544   | 0.2609050 | -33.98  | <.0001* | -9.9099   | -7.8210   |
| Gh        | Brazil | RIP1 | 24h  | Gh         | Uganda  | RIP2   | 72h   | -9.31608   | 0.2609050 | -35.71  | <.0001* | -10.3605  | -8.2717   |
| Gh        | Brazil | RIP1 | 24h  | Gh         | Uganda  | RIP3_5 | 24h   | -0.00902   | 0.2609050 | -0.03   | 1.0000  | -1.0535   | 1.0354    |
| Gh        | Brazil | RIP1 | 24h  | Gh         | Uganda  | RIP3_5 | 72h   | -0.78307   | 0.2609050 | -3.00   | 0.4842  | -1.8275   | 0.2614    |
| Gh        | Brazil | RIP1 | 24h  | Lh         | Brazil  | RIP1   | 24h   | 0.06581    | 0.2609050 | 0.25    | 1.0000  | -0.9786   | 1.1102    |
| Gh        | Brazil | RIP1 | 24h  | Lh         | Brazil  | RIP1   | 72h   | -0.43392   | 0.2609050 | -1.66   | 0.9993  | -1.4784   | 0.6105    |
| Gh        | Brazil | RIP1 | 24h  | Lh         | Brazil  | RIP2   | 24h   | -9.31993   | 0.2609050 | -35.72  | <.0001* | -10.3644  | -8.2755   |
| Gh        | Brazil | RIP1 | 24h  | Lh         | Brazil  | RIP2   | 72h   | -9.48674   | 0.2609050 | -36.36  | <.0001* | -10.5312  | -8.4423   |
| Gh        | Brazil | RIP1 | 24h  | Lh         | Brazil  | RIP3_5 | 24h   | -2.33877   | 0.2609050 | -8.96   | <.0001* | -3.3832   | -1.2943   |
| Gh        | Brazil | RIP1 | 24h  | Lh         | Brazil  | RIP3_5 | 72h   | -2.90519   | 0.2609050 | -11.14  | <.0001* | -3.9496   | -1.8608   |
| Gh        | Brazil | RIP1 | 24h  | Lh         | Uganda  | RIP1   | 24h   | -0.30429   | 0.2609050 | -1.17   | 1.0000  | -1.3487   | 0.7401    |
| Gh        | Brazil | RIP1 | 24h  | Lh         | Uganda  | RIP1   | 72h   | -0.58480   | 0.2609050 | -2.24   | 0.9420  | -1.6292   | 0.4596    |
| Gh        | Brazil | RIP1 | 24h  | Lh         | Uganda  | RIP2   | 24h   | -8.82479   | 0.2609050 | -33.82  | <.0001* | -9.8692   | -7.7804   |
| Gh        | Brazil | RIP1 | 24h  | Lh         | Uganda  | RIP2   | 72h   | -9.21528   | 0.2609050 | -35.32  | <.0001* | -10.2597  | -8.1709   |
| Gh        | Brazil | RIP1 | 24h  | Lh         | Uganda  | RIP3_5 | 24h   | -0.56831   | 0.2609050 | -2.18   | 0.9580  | -1.6127   | 0.4761    |
| Gh        | Brazil | RIP1 | 24h  | Lh         | Uganda  | RIP3_5 | 72h   | -1.76714   | 0.2609050 | -6.77   | <.0001* | -2.8116   | -0.7227   |

**Generalized Regression for Value****Standard Least Squares****Multiple Comparisons for Treatment\*Strain\*RIP\*Time****Tukey HSD All Pairwise Comparisons****All Pairwise Differences**

| Treatment | Strain | RIP  | Time | -Treatment | -Strain | -RIP   | -Time | Difference | Std Error | t Ratio | Prob> t | Lower 95% | Upper 95% |
|-----------|--------|------|------|------------|---------|--------|-------|------------|-----------|---------|---------|-----------|-----------|
| Gh        | Brazil | RIP1 | 24h  | no_wasp    | Brazil  | RIP1   | 24h   | -0.98086   | 0.2609050 | -3.76   | 0.0979  | -2.0253   | 0.0636    |
| Gh        | Brazil | RIP1 | 24h  | no_wasp    | Brazil  | RIP1   | 72h   | -1.11661   | 0.2609050 | -4.28   | 0.0217* | -2.1610   | -0.0722   |
| Gh        | Brazil | RIP1 | 24h  | no_wasp    | Brazil  | RIP2   | 24h   | -9.41148   | 0.2609050 | -36.07  | <.0001* | -10.4559  | -8.3671   |
| Gh        | Brazil | RIP1 | 24h  | no_wasp    | Brazil  | RIP2   | 72h   | -9.73428   | 0.2609050 | -37.31  | <.0001* | -10.7787  | -8.6898   |
| Gh        | Brazil | RIP1 | 24h  | no_wasp    | Brazil  | RIP3_5 | 24h   | -3.33838   | 0.2609050 | -12.80  | <.0001* | -4.3828   | -2.2940   |
| Gh        | Brazil | RIP1 | 24h  | no_wasp    | Brazil  | RIP3_5 | 72h   | -2.86906   | 0.2609050 | -11.00  | <.0001* | -3.9135   | -1.8246   |
| Gh        | Brazil | RIP1 | 24h  | no_wasp    | Uganda  | RIP1   | 24h   | -1.11230   | 0.2609050 | -4.26   | 0.0229* | -2.1567   | -0.0679   |
| Gh        | Brazil | RIP1 | 24h  | no_wasp    | Uganda  | RIP1   | 72h   | -1.59420   | 0.2609050 | -6.11   | <.0001* | -2.6386   | -0.5498   |
| Gh        | Brazil | RIP1 | 24h  | no_wasp    | Uganda  | RIP2   | 24h   | -9.01044   | 0.2609050 | -34.54  | <.0001* | -10.0549  | -7.9660   |
| Gh        | Brazil | RIP1 | 24h  | no_wasp    | Uganda  | RIP2   | 72h   | -8.36043   | 0.2609050 | -32.04  | <.0001* | -9.4049   | -7.3160   |
| Gh        | Brazil | RIP1 | 24h  | no_wasp    | Uganda  | RIP3_5 | 24h   | -1.10875   | 0.2609050 | -4.25   | 0.0239* | -2.1532   | -0.0643   |
| Gh        | Brazil | RIP1 | 24h  | no_wasp    | Uganda  | RIP3_5 | 72h   | -2.93665   | 0.2609050 | -11.26  | <.0001* | -3.9811   | -1.8922   |
| Gh        | Brazil | RIP1 | 72h  | Gh         | Brazil  | RIP2   | 24h   | -8.53402   | 0.2609050 | -32.71  | <.0001* | -9.5785   | -7.4896   |
| Gh        | Brazil | RIP1 | 72h  | Gh         | Brazil  | RIP2   | 72h   | -8.66924   | 0.2609050 | -33.23  | <.0001* | -9.7137   | -7.6248   |
| Gh        | Brazil | RIP1 | 72h  | Gh         | Brazil  | RIP3_5 | 24h   | -0.98049   | 0.2609050 | -3.76   | 0.0982  | -2.0249   | 0.0639    |
| Gh        | Brazil | RIP1 | 72h  | Gh         | Brazil  | RIP3_5 | 72h   | -2.85483   | 0.2609050 | -10.94  | <.0001* | -3.8993   | -1.8104   |
| Gh        | Brazil | RIP1 | 72h  | Gh         | Uganda  | RIP1   | 24h   | 0.68719    | 0.2609050 | 2.63    | 0.7531  | -0.3572   | 1.7316    |
| Gh        | Brazil | RIP1 | 72h  | Gh         | Uganda  | RIP1   | 72h   | 0.38197    | 0.2609050 | 1.46    | 0.9999  | -0.6625   | 1.4264    |
| Gh        | Brazil | RIP1 | 72h  | Gh         | Uganda  | RIP2   | 24h   | -8.17408   | 0.2609050 | -31.33  | <.0001* | -9.2185   | -7.1296   |
| Gh        | Brazil | RIP1 | 72h  | Gh         | Uganda  | RIP2   | 72h   | -8.62472   | 0.2609050 | -33.06  | <.0001* | -9.6692   | -7.5803   |
| Gh        | Brazil | RIP1 | 72h  | Gh         | Uganda  | RIP3_5 | 24h   | 0.68234    | 0.2609050 | 2.62    | 0.7653  | -0.3621   | 1.7268    |
| Gh        | Brazil | RIP1 | 72h  | Gh         | Uganda  | RIP3_5 | 72h   | -0.09171   | 0.2609050 | -0.35   | 1.0000  | -1.1361   | 0.9527    |
| Gh        | Brazil | RIP1 | 72h  | Lh         | Brazil  | RIP1   | 24h   | 0.75717    | 0.2609050 | 2.90    | 0.5585  | -0.2873   | 1.8016    |
| Gh        | Brazil | RIP1 | 72h  | Lh         | Brazil  | RIP1   | 72h   | 0.25744    | 0.2609050 | 0.99    | 1.0000  | -0.7870   | 1.3019    |
| Gh        | Brazil | RIP1 | 72h  | Lh         | Brazil  | RIP2   | 24h   | -8.62857   | 0.2609050 | -33.07  | <.0001* | -9.6730   | -7.5841   |
| Gh        | Brazil | RIP1 | 72h  | Lh         | Brazil  | RIP2   | 72h   | -8.79538   | 0.2609050 | -33.71  | <.0001* | -9.8398   | -7.7509   |
| Gh        | Brazil | RIP1 | 72h  | Lh         | Brazil  | RIP3_5 | 24h   | -1.64741   | 0.2609050 | -6.31   | <.0001* | -2.6918   | -0.6030   |
| Gh        | Brazil | RIP1 | 72h  | Lh         | Brazil  | RIP3_5 | 72h   | -2.21383   | 0.2609050 | -8.49   | <.0001* | -3.2583   | -1.1694   |
| Gh        | Brazil | RIP1 | 72h  | Lh         | Uganda  | RIP1   | 24h   | 0.38707    | 0.2609050 | 1.48    | 0.9999  | -0.6574   | 1.4315    |
| Gh        | Brazil | RIP1 | 72h  | Lh         | Uganda  | RIP1   | 72h   | 0.10656    | 0.2609050 | 0.41    | 1.0000  | -0.9379   | 1.1510    |
| Gh        | Brazil | RIP1 | 72h  | Lh         | Uganda  | RIP2   | 24h   | -8.13343   | 0.2609050 | -31.17  | <.0001* | -9.1779   | -7.0890   |

**Generalized Regression for Value**

**Standard Least Squares**

**Multiple Comparisons for Treatment\*Strain\*RIP\*Time**

**Tukey HSD All Pairwise Comparisons**

**All Pairwise Differences**

| Treatment | Strain | RIP  | Time | -Treatment | -Strain | -RIP   | -Time | Difference | Std Error | t Ratio | Prob> t | Lower 95% | Upper 95% |
|-----------|--------|------|------|------------|---------|--------|-------|------------|-----------|---------|---------|-----------|-----------|
| Gh        | Brazil | RIP1 | 72h  | Lh         | Uganda  | RIP2   | 72h   | -8.52392   | 0.2609050 | -32.67  | <.0001* | -9.5684   | -7.4795   |
| Gh        | Brazil | RIP1 | 72h  | Lh         | Uganda  | RIP3_5 | 24h   | 0.12305    | 0.2609050 | 0.47    | 1.0000  | -0.9214   | 1.1675    |
| Gh        | Brazil | RIP1 | 72h  | Lh         | Uganda  | RIP3_5 | 72h   | -1.07578   | 0.2609050 | -4.12   | 0.0351* | -2.1202   | -0.0313   |
| Gh        | Brazil | RIP1 | 72h  | no_wasp    | Brazil  | RIP1   | 24h   | -0.28950   | 0.2609050 | -1.11   | 1.0000  | -1.3339   | 0.7549    |
| Gh        | Brazil | RIP1 | 72h  | no_wasp    | Brazil  | RIP1   | 72h   | -0.42525   | 0.2609050 | -1.63   | 0.9995  | -1.4697   | 0.6192    |
| Gh        | Brazil | RIP1 | 72h  | no_wasp    | Brazil  | RIP2   | 24h   | -8.72013   | 0.2609050 | -33.42  | <.0001* | -9.7646   | -7.6757   |
| Gh        | Brazil | RIP1 | 72h  | no_wasp    | Brazil  | RIP2   | 72h   | -9.04292   | 0.2609050 | -34.66  | <.0001* | -10.0874  | -7.9985   |
| Gh        | Brazil | RIP1 | 72h  | no_wasp    | Brazil  | RIP3_5 | 24h   | -2.64702   | 0.2609050 | -10.15  | <.0001* | -3.6915   | -1.6026   |
| Gh        | Brazil | RIP1 | 72h  | no_wasp    | Brazil  | RIP3_5 | 72h   | -2.17770   | 0.2609050 | -8.35   | <.0001* | -3.2221   | -1.1333   |
| Gh        | Brazil | RIP1 | 72h  | no_wasp    | Uganda  | RIP1   | 24h   | -0.42094   | 0.2609050 | -1.61   | 0.9996  | -1.4654   | 0.6235    |
| Gh        | Brazil | RIP1 | 72h  | no_wasp    | Uganda  | RIP1   | 72h   | -0.90284   | 0.2609050 | -3.46   | 0.2029  | -1.9473   | 0.1416    |
| Gh        | Brazil | RIP1 | 72h  | no_wasp    | Uganda  | RIP2   | 24h   | -8.31909   | 0.2609050 | -31.89  | <.0001* | -9.3635   | -7.2747   |
| Gh        | Brazil | RIP1 | 72h  | no_wasp    | Uganda  | RIP2   | 72h   | -7.66907   | 0.2609050 | -29.39  | <.0001* | -8.7135   | -6.6246   |
| Gh        | Brazil | RIP1 | 72h  | no_wasp    | Uganda  | RIP3_5 | 24h   | -0.41739   | 0.2609050 | -1.60   | 0.9996  | -1.4618   | 0.6270    |
| Gh        | Brazil | RIP1 | 72h  | no_wasp    | Uganda  | RIP3_5 | 72h   | -2.24529   | 0.2609050 | -8.61   | <.0001* | -3.2897   | -1.2009   |
| Gh        | Brazil | RIP2 | 24h  | Gh         | Brazil  | RIP2   | 72h   | -0.13522   | 0.2609050 | -0.52   | 1.0000  | -1.1797   | 0.9092    |
| Gh        | Brazil | RIP2 | 24h  | Gh         | Brazil  | RIP3_5 | 24h   | 7.55354    | 0.2609050 | 28.95   | <.0001* | 6.5091    | 8.5980    |
| Gh        | Brazil | RIP2 | 24h  | Gh         | Brazil  | RIP3_5 | 72h   | 5.67919    | 0.2609050 | 21.77   | <.0001* | 4.6348    | 6.7236    |
| Gh        | Brazil | RIP2 | 24h  | Gh         | Uganda  | RIP1   | 24h   | 9.22122    | 0.2609050 | 35.34   | <.0001* | 8.1768    | 10.2656   |
| Gh        | Brazil | RIP2 | 24h  | Gh         | Uganda  | RIP1   | 72h   | 8.91599    | 0.2609050 | 34.17   | <.0001* | 7.8716    | 9.9604    |
| Gh        | Brazil | RIP2 | 24h  | Gh         | Uganda  | RIP2   | 24h   | 0.35994    | 0.2609050 | 1.38    | 1.0000  | -0.6845   | 1.4044    |
| Gh        | Brazil | RIP2 | 24h  | Gh         | Uganda  | RIP2   | 72h   | -0.09070   | 0.2609050 | -0.35   | 1.0000  | -1.1351   | 0.9537    |
| Gh        | Brazil | RIP2 | 24h  | Gh         | Uganda  | RIP3_5 | 24h   | 9.21636    | 0.2609050 | 35.32   | <.0001* | 8.1719    | 10.2608   |
| Gh        | Brazil | RIP2 | 24h  | Gh         | Uganda  | RIP3_5 | 72h   | 8.44231    | 0.2609050 | 32.36   | <.0001* | 7.3979    | 9.4867    |
| Gh        | Brazil | RIP2 | 24h  | Lh         | Brazil  | RIP1   | 24h   | 9.29119    | 0.2609050 | 35.61   | <.0001* | 8.2468    | 10.3356   |
| Gh        | Brazil | RIP2 | 24h  | Lh         | Brazil  | RIP1   | 72h   | 8.79146    | 0.2609050 | 33.70   | <.0001* | 7.7470    | 9.8359    |
| Gh        | Brazil | RIP2 | 24h  | Lh         | Brazil  | RIP2   | 24h   | -0.09455   | 0.2609050 | -0.36   | 1.0000  | -1.1390   | 0.9499    |
| Gh        | Brazil | RIP2 | 24h  | Lh         | Brazil  | RIP2   | 72h   | -0.26136   | 0.2609050 | -1.00   | 1.0000  | -1.3058   | 0.7831    |
| Gh        | Brazil | RIP2 | 24h  | Lh         | Brazil  | RIP3_5 | 24h   | 6.88661    | 0.2609050 | 26.40   | <.0001* | 5.8422    | 7.9310    |
| Gh        | Brazil | RIP2 | 24h  | Lh         | Brazil  | RIP3_5 | 72h   | 6.32019    | 0.2609050 | 24.22   | <.0001* | 5.2758    | 7.3646    |
| Gh        | Brazil | RIP2 | 24h  | Lh         | Uganda  | RIP1   | 24h   | 8.92109    | 0.2609050 | 34.19   | <.0001* | 7.8767    | 9.9655    |

**Generalized Regression for Value****Standard Least Squares****Multiple Comparisons for Treatment\*Strain\*RIP\*Time****Tukey HSD All Pairwise Comparisons****All Pairwise Differences**

| Treatment | Strain | RIP  | Time | -Treatment | -Strain | -RIP   | -Time | Difference | Std Error | t Ratio | Prob> t | Lower 95% | Upper 95% |
|-----------|--------|------|------|------------|---------|--------|-------|------------|-----------|---------|---------|-----------|-----------|
| Gh        | Brazil | RIP2 | 24h  | Lh         | Uganda  | RIP1   | 72h   | 8.64058    | 0.2609050 | 33.12   | <.0001* | 7.5961    | 9.6850    |
| Gh        | Brazil | RIP2 | 24h  | Lh         | Uganda  | RIP2   | 24h   | 0.40059    | 0.2609050 | 1.54    | 0.9998  | -0.6438   | 1.4450    |
| Gh        | Brazil | RIP2 | 24h  | Lh         | Uganda  | RIP2   | 72h   | 0.01010    | 0.2609050 | 0.04    | 1.0000  | -1.0343   | 1.0545    |
| Gh        | Brazil | RIP2 | 24h  | Lh         | Uganda  | RIP3_5 | 24h   | 8.65707    | 0.2609050 | 33.18   | <.0001* | 7.6126    | 9.7015    |
| Gh        | Brazil | RIP2 | 24h  | Lh         | Uganda  | RIP3_5 | 72h   | 7.45824    | 0.2609050 | 28.59   | <.0001* | 6.4138    | 8.5027    |
| Gh        | Brazil | RIP2 | 24h  | no_wasp    | Brazil  | RIP1   | 24h   | 8.24452    | 0.2609050 | 31.60   | <.0001* | 7.2001    | 9.2890    |
| Gh        | Brazil | RIP2 | 24h  | no_wasp    | Brazil  | RIP1   | 72h   | 8.10877    | 0.2609050 | 31.08   | <.0001* | 7.0643    | 9.1532    |
| Gh        | Brazil | RIP2 | 24h  | no_wasp    | Brazil  | RIP2   | 24h   | -0.18610   | 0.2609050 | -0.71   | 1.0000  | -1.2305   | 0.8583    |
| Gh        | Brazil | RIP2 | 24h  | no_wasp    | Brazil  | RIP2   | 72h   | -0.50890   | 0.2609050 | -1.95   | 0.9900  | -1.5533   | 0.5355    |
| Gh        | Brazil | RIP2 | 24h  | no_wasp    | Brazil  | RIP3_5 | 24h   | 5.88700    | 0.2609050 | 22.56   | <.0001* | 4.8426    | 6.9314    |
| Gh        | Brazil | RIP2 | 24h  | no_wasp    | Brazil  | RIP3_5 | 72h   | 6.35632    | 0.2609050 | 24.36   | <.0001* | 5.3119    | 7.4007    |
| Gh        | Brazil | RIP2 | 24h  | no_wasp    | Uganda  | RIP1   | 24h   | 8.11308    | 0.2609050 | 31.10   | <.0001* | 7.0686    | 9.1575    |
| Gh        | Brazil | RIP2 | 24h  | no_wasp    | Uganda  | RIP1   | 72h   | 7.63118    | 0.2609050 | 29.25   | <.0001* | 6.5867    | 8.6756    |
| Gh        | Brazil | RIP2 | 24h  | no_wasp    | Uganda  | RIP2   | 24h   | 0.21493    | 0.2609050 | 0.82    | 1.0000  | -0.8295   | 1.2594    |
| Gh        | Brazil | RIP2 | 24h  | no_wasp    | Uganda  | RIP2   | 72h   | 0.86495    | 0.2609050 | 3.32    | 0.2767  | -0.1795   | 1.9094    |
| Gh        | Brazil | RIP2 | 24h  | no_wasp    | Uganda  | RIP3_5 | 24h   | 8.11663    | 0.2609050 | 31.11   | <.0001* | 7.0722    | 9.1611    |
| Gh        | Brazil | RIP2 | 24h  | no_wasp    | Uganda  | RIP3_5 | 72h   | 6.28873    | 0.2609050 | 24.10   | <.0001* | 5.2443    | 7.3332    |
| Gh        | Brazil | RIP2 | 72h  | Gh         | Brazil  | RIP3_5 | 24h   | 7.68876    | 0.2609050 | 29.47   | <.0001* | 6.6443    | 8.7332    |
| Gh        | Brazil | RIP2 | 72h  | Gh         | Brazil  | RIP3_5 | 72h   | 5.81441    | 0.2609050 | 22.29   | <.0001* | 4.7700    | 6.8588    |
| Gh        | Brazil | RIP2 | 72h  | Gh         | Uganda  | RIP1   | 24h   | 9.35644    | 0.2609050 | 35.86   | <.0001* | 8.3120    | 10.4009   |
| Gh        | Brazil | RIP2 | 72h  | Gh         | Uganda  | RIP1   | 72h   | 9.05122    | 0.2609050 | 34.69   | <.0001* | 8.0068    | 10.0956   |
| Gh        | Brazil | RIP2 | 72h  | Gh         | Uganda  | RIP2   | 24h   | 0.49517    | 0.2609050 | 1.90    | 0.9933  | -0.5493   | 1.5396    |
| Gh        | Brazil | RIP2 | 72h  | Gh         | Uganda  | RIP2   | 72h   | 0.04452    | 0.2609050 | 0.17    | 1.0000  | -0.9999   | 1.0890    |
| Gh        | Brazil | RIP2 | 72h  | Gh         | Uganda  | RIP3_5 | 24h   | 9.35158    | 0.2609050 | 35.84   | <.0001* | 8.3072    | 10.3960   |
| Gh        | Brazil | RIP2 | 72h  | Gh         | Uganda  | RIP3_5 | 72h   | 8.57754    | 0.2609050 | 32.88   | <.0001* | 7.5331    | 9.6220    |
| Gh        | Brazil | RIP2 | 72h  | Lh         | Brazil  | RIP1   | 24h   | 9.42641    | 0.2609050 | 36.13   | <.0001* | 8.3820    | 10.4708   |
| Gh        | Brazil | RIP2 | 72h  | Lh         | Brazil  | RIP1   | 72h   | 8.92668    | 0.2609050 | 34.21   | <.0001* | 7.8823    | 9.9711    |
| Gh        | Brazil | RIP2 | 72h  | Lh         | Brazil  | RIP2   | 24h   | 0.04067    | 0.2609050 | 0.16    | 1.0000  | -1.0038   | 1.0851    |
| Gh        | Brazil | RIP2 | 72h  | Lh         | Brazil  | RIP2   | 72h   | -0.12613   | 0.2609050 | -0.48   | 1.0000  | -1.1706   | 0.9183    |
| Gh        | Brazil | RIP2 | 72h  | Lh         | Brazil  | RIP3_5 | 24h   | 7.02184    | 0.2609050 | 26.91   | <.0001* | 5.9774    | 8.0663    |
| Gh        | Brazil | RIP2 | 72h  | Lh         | Brazil  | RIP3_5 | 72h   | 6.45541    | 0.2609050 | 24.74   | <.0001* | 5.4110    | 7.4998    |

**Generalized Regression for Value**

**Standard Least Squares**

**Multiple Comparisons for Treatment\*Strain\*RIP\*Time**

**Tukey HSD All Pairwise Comparisons**

**All Pairwise Differences**

| Treatment | Strain | RIP    | Time | -Treatment | -Strain | -RIP   | -Time | Difference | Std Error | t Ratio | Prob> t | Lower 95% | Upper 95% |
|-----------|--------|--------|------|------------|---------|--------|-------|------------|-----------|---------|---------|-----------|-----------|
| Gh        | Brazil | RIP2   | 72h  | Lh         | Uganda  | RIP1   | 24h   | 9.05632    | 0.2609050 | 34.71   | <.0001* | 8.0119    | 10.1007   |
| Gh        | Brazil | RIP2   | 72h  | Lh         | Uganda  | RIP1   | 72h   | 8.77580    | 0.2609050 | 33.64   | <.0001* | 7.7314    | 9.8202    |
| Gh        | Brazil | RIP2   | 72h  | Lh         | Uganda  | RIP2   | 24h   | 0.53581    | 0.2609050 | 2.05    | 0.9798  | -0.5086   | 1.5802    |
| Gh        | Brazil | RIP2   | 72h  | Lh         | Uganda  | RIP2   | 72h   | 0.14532    | 0.2609050 | 0.56    | 1.0000  | -0.8991   | 1.1898    |
| Gh        | Brazil | RIP2   | 72h  | Lh         | Uganda  | RIP3_5 | 24h   | 8.79229    | 0.2609050 | 33.70   | <.0001* | 7.7479    | 9.8367    |
| Gh        | Brazil | RIP2   | 72h  | Lh         | Uganda  | RIP3_5 | 72h   | 7.59347    | 0.2609050 | 29.10   | <.0001* | 6.5490    | 8.6379    |
| Gh        | Brazil | RIP2   | 72h  | no_wasp    | Brazil  | RIP1   | 24h   | 8.37975    | 0.2609050 | 32.12   | <.0001* | 7.3353    | 9.4242    |
| Gh        | Brazil | RIP2   | 72h  | no_wasp    | Brazil  | RIP1   | 72h   | 8.24400    | 0.2609050 | 31.60   | <.0001* | 7.1996    | 9.2884    |
| Gh        | Brazil | RIP2   | 72h  | no_wasp    | Brazil  | RIP2   | 24h   | -0.05088   | 0.2609050 | -0.20   | 1.0000  | -1.0953   | 0.9935    |
| Gh        | Brazil | RIP2   | 72h  | no_wasp    | Brazil  | RIP2   | 72h   | -0.37368   | 0.2609050 | -1.43   | 1.0000  | -1.4181   | 0.6708    |
| Gh        | Brazil | RIP2   | 72h  | no_wasp    | Brazil  | RIP3_5 | 24h   | 6.02222    | 0.2609050 | 23.08   | <.0001* | 4.9778    | 7.0667    |
| Gh        | Brazil | RIP2   | 72h  | no_wasp    | Brazil  | RIP3_5 | 72h   | 6.49154    | 0.2609050 | 24.88   | <.0001* | 5.4471    | 7.5360    |
| Gh        | Brazil | RIP2   | 72h  | no_wasp    | Uganda  | RIP1   | 24h   | 8.24830    | 0.2609050 | 31.61   | <.0001* | 7.2039    | 9.2927    |
| Gh        | Brazil | RIP2   | 72h  | no_wasp    | Uganda  | RIP1   | 72h   | 7.76640    | 0.2609050 | 29.77   | <.0001* | 6.7220    | 8.8108    |
| Gh        | Brazil | RIP2   | 72h  | no_wasp    | Uganda  | RIP2   | 24h   | 0.35016    | 0.2609050 | 1.34    | 1.0000  | -0.6943   | 1.3946    |
| Gh        | Brazil | RIP2   | 72h  | no_wasp    | Uganda  | RIP2   | 72h   | 1.00017    | 0.2609050 | 3.83    | 0.0804  | -0.0443   | 2.0446    |
| Gh        | Brazil | RIP2   | 72h  | no_wasp    | Uganda  | RIP3_5 | 24h   | 8.25185    | 0.2609050 | 31.63   | <.0001* | 7.2074    | 9.2963    |
| Gh        | Brazil | RIP2   | 72h  | no_wasp    | Uganda  | RIP3_5 | 72h   | 6.42395    | 0.2609050 | 24.62   | <.0001* | 5.3795    | 7.4684    |
| Gh        | Brazil | RIP3_5 | 24h  | Gh         | Brazil  | RIP3_5 | 72h   | -1.87435   | 0.2609050 | -7.18   | <.0001* | -2.9188   | -0.8299   |
| Gh        | Brazil | RIP3_5 | 24h  | Gh         | Uganda  | RIP1   | 24h   | 1.66768    | 0.2609050 | 6.39    | <.0001* | 0.6232    | 2.7121    |
| Gh        | Brazil | RIP3_5 | 24h  | Gh         | Uganda  | RIP1   | 72h   | 1.36246    | 0.2609050 | 5.22    | 0.0008* | 0.3180    | 2.4069    |
| Gh        | Brazil | RIP3_5 | 24h  | Gh         | Uganda  | RIP2   | 24h   | -7.19359   | 0.2609050 | -27.57  | <.0001* | -8.2380   | -6.1492   |
| Gh        | Brazil | RIP3_5 | 24h  | Gh         | Uganda  | RIP2   | 72h   | -7.64424   | 0.2609050 | -29.30  | <.0001* | -8.6887   | -6.5998   |
| Gh        | Brazil | RIP3_5 | 24h  | Gh         | Uganda  | RIP3_5 | 24h   | 1.66282    | 0.2609050 | 6.37    | <.0001* | 0.6184    | 2.7073    |
| Gh        | Brazil | RIP3_5 | 24h  | Gh         | Uganda  | RIP3_5 | 72h   | 0.88878    | 0.2609050 | 3.41    | 0.2285  | -0.1557   | 1.9332    |
| Gh        | Brazil | RIP3_5 | 24h  | Lh         | Brazil  | RIP1   | 24h   | 1.73766    | 0.2609050 | 6.66    | <.0001* | 0.6932    | 2.7821    |
| Gh        | Brazil | RIP3_5 | 24h  | Lh         | Brazil  | RIP1   | 72h   | 1.23792    | 0.2609050 | 4.74    | 0.0047* | 0.1935    | 2.2824    |
| Gh        | Brazil | RIP3_5 | 24h  | Lh         | Brazil  | RIP2   | 24h   | -7.64809   | 0.2609050 | -29.31  | <.0001* | -8.6925   | -6.6037   |
| Gh        | Brazil | RIP3_5 | 24h  | Lh         | Brazil  | RIP2   | 72h   | -7.81489   | 0.2609050 | -29.95  | <.0001* | -8.8593   | -6.7705   |
| Gh        | Brazil | RIP3_5 | 24h  | Lh         | Brazil  | RIP3_5 | 24h   | -0.66692   | 0.2609050 | -2.56   | 0.8023  | -1.7114   | 0.3775    |
| Gh        | Brazil | RIP3_5 | 24h  | Lh         | Brazil  | RIP3_5 | 72h   | -1.23335   | 0.2609050 | -4.73   | 0.0049* | -2.2778   | -0.1889   |

**Generalized Regression for Value****Standard Least Squares****Multiple Comparisons for Treatment\*Strain\*RIP\*Time****Tukey HSD All Pairwise Comparisons****All Pairwise Differences**

| Treatment | Strain | RIP    | Time | -Treatment | -Strain | -RIP   | -Time | Difference | Std Error | t Ratio | Prob> t | Lower 95% | Upper 95% |
|-----------|--------|--------|------|------------|---------|--------|-------|------------|-----------|---------|---------|-----------|-----------|
| Gh        | Brazil | RIP3_5 | 24h  | Lh         | Uganda  | RIP1   | 24h   | 1.36756    | 0.2609050 | 5.24    | 0.0008* | 0.3231    | 2.4120    |
| Gh        | Brazil | RIP3_5 | 24h  | Lh         | Uganda  | RIP1   | 72h   | 1.08704    | 0.2609050 | 4.17    | 0.0308* | 0.0426    | 2.1315    |
| Gh        | Brazil | RIP3_5 | 24h  | Lh         | Uganda  | RIP2   | 24h   | -7.15295   | 0.2609050 | -27.42  | <.0001* | -8.1974   | -6.1085   |
| Gh        | Brazil | RIP3_5 | 24h  | Lh         | Uganda  | RIP2   | 72h   | -7.54344   | 0.2609050 | -28.91  | <.0001* | -8.5879   | -6.4990   |
| Gh        | Brazil | RIP3_5 | 24h  | Lh         | Uganda  | RIP3_5 | 24h   | 1.10353    | 0.2609050 | 4.23    | 0.0254* | 0.0591    | 2.1480    |
| Gh        | Brazil | RIP3_5 | 24h  | Lh         | Uganda  | RIP3_5 | 72h   | -0.09529   | 0.2609050 | -0.37   | 1.0000  | -1.1397   | 0.9491    |
| Gh        | Brazil | RIP3_5 | 24h  | no_wasp    | Brazil  | RIP1   | 24h   | 0.69099    | 0.2609050 | 2.65    | 0.7434  | -0.3534   | 1.7354    |
| Gh        | Brazil | RIP3_5 | 24h  | no_wasp    | Brazil  | RIP1   | 72h   | 0.55524    | 0.2609050 | 2.13    | 0.9682  | -0.4892   | 1.5997    |
| Gh        | Brazil | RIP3_5 | 24h  | no_wasp    | Brazil  | RIP2   | 24h   | -7.73964   | 0.2609050 | -29.66  | <.0001* | -8.7841   | -6.6952   |
| Gh        | Brazil | RIP3_5 | 24h  | no_wasp    | Brazil  | RIP2   | 72h   | -8.06244   | 0.2609050 | -30.90  | <.0001* | -9.1069   | -7.0180   |
| Gh        | Brazil | RIP3_5 | 24h  | no_wasp    | Brazil  | RIP3_5 | 24h   | -1.66654   | 0.2609050 | -6.39   | <.0001* | -2.7110   | -0.6221   |
| Gh        | Brazil | RIP3_5 | 24h  | no_wasp    | Brazil  | RIP3_5 | 72h   | -1.19722   | 0.2609050 | -4.59   | 0.0079* | -2.2416   | -0.1528   |
| Gh        | Brazil | RIP3_5 | 24h  | no_wasp    | Uganda  | RIP1   | 24h   | 0.55955    | 0.2609050 | 2.14    | 0.9651  | -0.4849   | 1.6040    |
| Gh        | Brazil | RIP3_5 | 24h  | no_wasp    | Uganda  | RIP1   | 72h   | 0.07764    | 0.2609050 | 0.30    | 1.0000  | -0.9668   | 1.1221    |
| Gh        | Brazil | RIP3_5 | 24h  | no_wasp    | Uganda  | RIP2   | 24h   | -7.33860   | 0.2609050 | -28.13  | <.0001* | -8.3830   | -6.2942   |
| Gh        | Brazil | RIP3_5 | 24h  | no_wasp    | Uganda  | RIP2   | 72h   | -6.68858   | 0.2609050 | -25.64  | <.0001* | -7.7330   | -5.6442   |
| Gh        | Brazil | RIP3_5 | 24h  | no_wasp    | Uganda  | RIP3_5 | 24h   | 0.56309    | 0.2609050 | 2.16    | 0.9624  | -0.4813   | 1.6075    |
| Gh        | Brazil | RIP3_5 | 24h  | no_wasp    | Uganda  | RIP3_5 | 72h   | -1.26481   | 0.2609050 | -4.85   | 0.0032* | -2.3092   | -0.2204   |
| Gh        | Brazil | RIP3_5 | 72h  | Gh         | Uganda  | RIP1   | 24h   | 3.54203    | 0.2609050 | 13.58   | <.0001* | 2.4976    | 4.5865    |
| Gh        | Brazil | RIP3_5 | 72h  | Gh         | Uganda  | RIP1   | 72h   | 3.23680    | 0.2609050 | 12.41   | <.0001* | 2.1924    | 4.2812    |
| Gh        | Brazil | RIP3_5 | 72h  | Gh         | Uganda  | RIP2   | 24h   | -5.31925   | 0.2609050 | -20.39  | <.0001* | -6.3637   | -4.2748   |
| Gh        | Brazil | RIP3_5 | 72h  | Gh         | Uganda  | RIP2   | 72h   | -5.76989   | 0.2609050 | -22.11  | <.0001* | -6.8143   | -4.7255   |
| Gh        | Brazil | RIP3_5 | 72h  | Gh         | Uganda  | RIP3_5 | 24h   | 3.53717    | 0.2609050 | 13.56   | <.0001* | 2.4927    | 4.5816    |
| Gh        | Brazil | RIP3_5 | 72h  | Gh         | Uganda  | RIP3_5 | 72h   | 2.76312    | 0.2609050 | 10.59   | <.0001* | 1.7187    | 3.8076    |
| Gh        | Brazil | RIP3_5 | 72h  | Lh         | Brazil  | RIP1   | 24h   | 3.61200    | 0.2609050 | 13.84   | <.0001* | 2.5676    | 4.6564    |
| Gh        | Brazil | RIP3_5 | 72h  | Lh         | Brazil  | RIP1   | 72h   | 3.11227    | 0.2609050 | 11.93   | <.0001* | 2.0678    | 4.1567    |
| Gh        | Brazil | RIP3_5 | 72h  | Lh         | Brazil  | RIP2   | 24h   | -5.77374   | 0.2609050 | -22.13  | <.0001* | -6.8182   | -4.7293   |
| Gh        | Brazil | RIP3_5 | 72h  | Lh         | Brazil  | RIP2   | 72h   | -5.94055   | 0.2609050 | -22.77  | <.0001* | -6.9850   | -4.8961   |
| Gh        | Brazil | RIP3_5 | 72h  | Lh         | Brazil  | RIP3_5 | 24h   | 1.20742    | 0.2609050 | 4.63    | 0.0070* | 0.1630    | 2.2519    |
| Gh        | Brazil | RIP3_5 | 72h  | Lh         | Brazil  | RIP3_5 | 72h   | 0.64100    | 0.2609050 | 2.46    | 0.8573  | -0.4034   | 1.6854    |
| Gh        | Brazil | RIP3_5 | 72h  | Lh         | Uganda  | RIP1   | 24h   | 3.24190    | 0.2609050 | 12.43   | <.0001* | 2.1975    | 4.2863    |

**Generalized Regression for Value****Standard Least Squares****Multiple Comparisons for Treatment\*Strain\*RIP\*Time****Tukey HSD All Pairwise Comparisons****All Pairwise Differences**

| Treatment | Strain | RIP    | Time | -Treatment | -Strain | -RIP   | -Time | Difference | Std Error | t Ratio | Prob> t | Lower 95% | Upper 95% |
|-----------|--------|--------|------|------------|---------|--------|-------|------------|-----------|---------|---------|-----------|-----------|
| Gh        | Brazil | RIP3_5 | 72h  | Lh         | Uganda  | RIP1   | 72h   | 2.96139    | 0.2609050 | 11.35   | <.0001* | 1.9170    | 4.0058    |
| Gh        | Brazil | RIP3_5 | 72h  | Lh         | Uganda  | RIP2   | 24h   | -5.27860   | 0.2609050 | -20.23  | <.0001* | -6.3230   | -4.2342   |
| Gh        | Brazil | RIP3_5 | 72h  | Lh         | Uganda  | RIP2   | 72h   | -5.66909   | 0.2609050 | -21.73  | <.0001* | -6.7135   | -4.6247   |
| Gh        | Brazil | RIP3_5 | 72h  | Lh         | Uganda  | RIP3_5 | 24h   | 2.97788    | 0.2609050 | 11.41   | <.0001* | 1.9334    | 4.0223    |
| Gh        | Brazil | RIP3_5 | 72h  | Lh         | Uganda  | RIP3_5 | 72h   | 1.77905    | 0.2609050 | 6.82    | <.0001* | 0.7346    | 2.8235    |
| Gh        | Brazil | RIP3_5 | 72h  | no_wasp    | Brazil  | RIP1   | 24h   | 2.56533    | 0.2609050 | 9.83    | <.0001* | 1.5209    | 3.6098    |
| Gh        | Brazil | RIP3_5 | 72h  | no_wasp    | Brazil  | RIP1   | 72h   | 2.42958    | 0.2609050 | 9.31    | <.0001* | 1.3852    | 3.4740    |
| Gh        | Brazil | RIP3_5 | 72h  | no_wasp    | Brazil  | RIP2   | 24h   | -5.86529   | 0.2609050 | -22.48  | <.0001* | -6.9097   | -4.8209   |
| Gh        | Brazil | RIP3_5 | 72h  | no_wasp    | Brazil  | RIP2   | 72h   | -6.18809   | 0.2609050 | -23.72  | <.0001* | -7.2325   | -5.1437   |
| Gh        | Brazil | RIP3_5 | 72h  | no_wasp    | Brazil  | RIP3_5 | 24h   | 0.20781    | 0.2609050 | 0.80    | 1.0000  | -0.8366   | 1.2522    |
| Gh        | Brazil | RIP3_5 | 72h  | no_wasp    | Brazil  | RIP3_5 | 72h   | 0.67713    | 0.2609050 | 2.60    | 0.7781  | -0.3673   | 1.7216    |
| Gh        | Brazil | RIP3_5 | 72h  | no_wasp    | Uganda  | RIP1   | 24h   | 2.43389    | 0.2609050 | 9.33    | <.0001* | 1.3895    | 3.4783    |
| Gh        | Brazil | RIP3_5 | 72h  | no_wasp    | Uganda  | RIP1   | 72h   | 1.95199    | 0.2609050 | 7.48    | <.0001* | 0.9076    | 2.9964    |
| Gh        | Brazil | RIP3_5 | 72h  | no_wasp    | Uganda  | RIP2   | 24h   | -5.46426   | 0.2609050 | -20.94  | <.0001* | -6.5087   | -4.4198   |
| Gh        | Brazil | RIP3_5 | 72h  | no_wasp    | Uganda  | RIP2   | 72h   | -4.81424   | 0.2609050 | -18.45  | <.0001* | -5.8587   | -3.7698   |
| Gh        | Brazil | RIP3_5 | 72h  | no_wasp    | Uganda  | RIP3_5 | 24h   | 2.43744    | 0.2609050 | 9.34    | <.0001* | 1.3930    | 3.4819    |
| Gh        | Brazil | RIP3_5 | 72h  | no_wasp    | Uganda  | RIP3_5 | 72h   | 0.60954    | 0.2609050 | 2.34    | 0.9107  | -0.4349   | 1.6540    |
| Gh        | Uganda | RIP1   | 24h  | Gh         | Uganda  | RIP1   | 72h   | -0.30522   | 0.2609050 | -1.17   | 1.0000  | -1.3497   | 0.7392    |
| Gh        | Uganda | RIP1   | 24h  | Gh         | Uganda  | RIP2   | 24h   | -8.86127   | 0.2609050 | -33.96  | <.0001* | -9.9057   | -7.8168   |
| Gh        | Uganda | RIP1   | 24h  | Gh         | Uganda  | RIP2   | 72h   | -9.31192   | 0.2609050 | -35.69  | <.0001* | -10.3563  | -8.2675   |
| Gh        | Uganda | RIP1   | 24h  | Gh         | Uganda  | RIP3_5 | 24h   | -0.00486   | 0.2609050 | -0.02   | 1.0000  | -1.0493   | 1.0396    |
| Gh        | Uganda | RIP1   | 24h  | Gh         | Uganda  | RIP3_5 | 72h   | -0.77890   | 0.2609050 | -2.99   | 0.4960  | -1.8233   | 0.2655    |
| Gh        | Uganda | RIP1   | 24h  | Lh         | Brazil  | RIP1   | 24h   | 0.06998    | 0.2609050 | 0.27    | 1.0000  | -0.9745   | 1.1144    |
| Gh        | Uganda | RIP1   | 24h  | Lh         | Brazil  | RIP1   | 72h   | -0.42976   | 0.2609050 | -1.65   | 0.9994  | -1.4742   | 0.6147    |
| Gh        | Uganda | RIP1   | 24h  | Lh         | Brazil  | RIP2   | 24h   | -9.31577   | 0.2609050 | -35.71  | <.0001* | -10.3602  | -8.2713   |
| Gh        | Uganda | RIP1   | 24h  | Lh         | Brazil  | RIP2   | 72h   | -9.48257   | 0.2609050 | -36.34  | <.0001* | -10.5270  | -8.4381   |
| Gh        | Uganda | RIP1   | 24h  | Lh         | Brazil  | RIP3_5 | 24h   | -2.33460   | 0.2609050 | -8.95   | <.0001* | -3.3790   | -1.2902   |
| Gh        | Uganda | RIP1   | 24h  | Lh         | Brazil  | RIP3_5 | 72h   | -2.90103   | 0.2609050 | -11.12  | <.0001* | -3.9455   | -1.8566   |
| Gh        | Uganda | RIP1   | 24h  | Lh         | Uganda  | RIP1   | 24h   | -0.30012   | 0.2609050 | -1.15   | 1.0000  | -1.3446   | 0.7443    |
| Gh        | Uganda | RIP1   | 24h  | Lh         | Uganda  | RIP1   | 72h   | -0.58064   | 0.2609050 | -2.23   | 0.9464  | -1.6251   | 0.4638    |
| Gh        | Uganda | RIP1   | 24h  | Lh         | Uganda  | RIP2   | 24h   | -8.82063   | 0.2609050 | -33.81  | <.0001* | -9.8651   | -7.7762   |



**Generalized Regression for Value****Standard Least Squares****Multiple Comparisons for Treatment\*Strain\*RIP\*Time****Tukey HSD All Pairwise Comparisons****All Pairwise Differences**

| Treatment | Strain | RIP  | Time | -Treatment | -Strain | -RIP   | -Time | Difference | Std Error | t Ratio | Prob> t | Lower 95% | Upper 95% |
|-----------|--------|------|------|------------|---------|--------|-------|------------|-----------|---------|---------|-----------|-----------|
| Gh        | Uganda | RIP1 | 24h  | Lh         | Uganda  | RIP2   | 72h   | -9.21112   | 0.2609050 | -35.30  | <.0001* | -10.2555  | -8.1667   |
| Gh        | Uganda | RIP1 | 24h  | Lh         | Uganda  | RIP3_5 | 24h   | -0.56415   | 0.2609050 | -2.16   | 0.9615  | -1.6086   | 0.4803    |
| Gh        | Uganda | RIP1 | 24h  | Lh         | Uganda  | RIP3_5 | 72h   | -1.76297   | 0.2609050 | -6.76   | <.0001* | -2.8074   | -0.7185   |
| Gh        | Uganda | RIP1 | 24h  | no_wasp    | Brazil  | RIP1   | 24h   | -0.97669   | 0.2609050 | -3.74   | 0.1020  | -2.0211   | 0.0677    |
| Gh        | Uganda | RIP1 | 24h  | no_wasp    | Brazil  | RIP1   | 72h   | -1.11244   | 0.2609050 | -4.26   | 0.0228* | -2.1569   | -0.0680   |
| Gh        | Uganda | RIP1 | 24h  | no_wasp    | Brazil  | RIP2   | 24h   | -9.40732   | 0.2609050 | -36.06  | <.0001* | -10.4518  | -8.3629   |
| Gh        | Uganda | RIP1 | 24h  | no_wasp    | Brazil  | RIP2   | 72h   | -9.73012   | 0.2609050 | -37.29  | <.0001* | -10.7745  | -8.6857   |
| Gh        | Uganda | RIP1 | 24h  | no_wasp    | Brazil  | RIP3_5 | 24h   | -3.33422   | 0.2609050 | -12.78  | <.0001* | -4.3786   | -2.2898   |
| Gh        | Uganda | RIP1 | 24h  | no_wasp    | Brazil  | RIP3_5 | 72h   | -2.86490   | 0.2609050 | -10.98  | <.0001* | -3.9093   | -1.8205   |
| Gh        | Uganda | RIP1 | 24h  | no_wasp    | Uganda  | RIP1   | 24h   | -1.10813   | 0.2609050 | -4.25   | 0.0240* | -2.1526   | -0.0637   |
| Gh        | Uganda | RIP1 | 24h  | no_wasp    | Uganda  | RIP1   | 72h   | -1.59004   | 0.2609050 | -6.09   | <.0001* | -2.6345   | -0.5456   |
| Gh        | Uganda | RIP1 | 24h  | no_wasp    | Uganda  | RIP2   | 24h   | -9.00628   | 0.2609050 | -34.52  | <.0001* | -10.0507  | -7.9618   |
| Gh        | Uganda | RIP1 | 24h  | no_wasp    | Uganda  | RIP2   | 72h   | -8.35626   | 0.2609050 | -32.03  | <.0001* | -9.4007   | -7.3118   |
| Gh        | Uganda | RIP1 | 24h  | no_wasp    | Uganda  | RIP3_5 | 24h   | -1.10459   | 0.2609050 | -4.23   | 0.0251* | -2.1490   | -0.0602   |
| Gh        | Uganda | RIP1 | 24h  | no_wasp    | Uganda  | RIP3_5 | 72h   | -2.93249   | 0.2609050 | -11.24  | <.0001* | -3.9769   | -1.8881   |
| Gh        | Uganda | RIP1 | 72h  | Gh         | Uganda  | RIP2   | 24h   | -8.55605   | 0.2609050 | -32.79  | <.0001* | -9.6005   | -7.5116   |
| Gh        | Uganda | RIP1 | 72h  | Gh         | Uganda  | RIP2   | 72h   | -9.00669   | 0.2609050 | -34.52  | <.0001* | -10.0511  | -7.9623   |
| Gh        | Uganda | RIP1 | 72h  | Gh         | Uganda  | RIP3_5 | 24h   | 0.30037    | 0.2609050 | 1.15    | 1.0000  | -0.7441   | 1.3448    |
| Gh        | Uganda | RIP1 | 72h  | Gh         | Uganda  | RIP3_5 | 72h   | -0.47368   | 0.2609050 | -1.82   | 0.9967  | -1.5181   | 0.5708    |
| Gh        | Uganda | RIP1 | 72h  | Lh         | Brazil  | RIP1   | 24h   | 0.37520    | 0.2609050 | 1.44    | 1.0000  | -0.6692   | 1.4196    |
| Gh        | Uganda | RIP1 | 72h  | Lh         | Brazil  | RIP1   | 72h   | -0.12453   | 0.2609050 | -0.48   | 1.0000  | -1.1690   | 0.9199    |
| Gh        | Uganda | RIP1 | 72h  | Lh         | Brazil  | RIP2   | 24h   | -9.01054   | 0.2609050 | -34.54  | <.0001* | -10.0550  | -7.9661   |
| Gh        | Uganda | RIP1 | 72h  | Lh         | Brazil  | RIP2   | 72h   | -9.17735   | 0.2609050 | -35.18  | <.0001* | -10.2218  | -8.1329   |
| Gh        | Uganda | RIP1 | 72h  | Lh         | Brazil  | RIP3_5 | 24h   | -2.02938   | 0.2609050 | -7.78   | <.0001* | -3.0738   | -0.9849   |
| Gh        | Uganda | RIP1 | 72h  | Lh         | Brazil  | RIP3_5 | 72h   | -2.59580   | 0.2609050 | -9.95   | <.0001* | -3.6402   | -1.5514   |
| Gh        | Uganda | RIP1 | 72h  | Lh         | Uganda  | RIP1   | 24h   | 0.00510    | 0.2609050 | 0.02    | 1.0000  | -1.0393   | 1.0495    |
| Gh        | Uganda | RIP1 | 72h  | Lh         | Uganda  | RIP1   | 72h   | -0.27541   | 0.2609050 | -1.06   | 1.0000  | -1.3198   | 0.7690    |
| Gh        | Uganda | RIP1 | 72h  | Lh         | Uganda  | RIP2   | 24h   | -8.51540   | 0.2609050 | -32.64  | <.0001* | -9.5598   | -7.4710   |
| Gh        | Uganda | RIP1 | 72h  | Lh         | Uganda  | RIP2   | 72h   | -8.90589   | 0.2609050 | -34.13  | <.0001* | -9.9503   | -7.8615   |
| Gh        | Uganda | RIP1 | 72h  | Lh         | Uganda  | RIP3_5 | 24h   | -0.25892   | 0.2609050 | -0.99   | 1.0000  | -1.3034   | 0.7855    |
| Gh        | Uganda | RIP1 | 72h  | Lh         | Uganda  | RIP3_5 | 72h   | -1.45775   | 0.2609050 | -5.59   | 0.0002* | -2.5022   | -0.4133   |

**Generalized Regression for Value**

**Standard Least Squares**

**Multiple Comparisons for Treatment\*Strain\*RIP\*Time**

**Tukey HSD All Pairwise Comparisons**

**All Pairwise Differences**

| Treatment | Strain | RIP  | Time | -Treatment | -Strain | -RIP   | -Time | Difference | Std Error | t Ratio | Prob> t | Lower 95% | Upper 95% |
|-----------|--------|------|------|------------|---------|--------|-------|------------|-----------|---------|---------|-----------|-----------|
| Gh        | Uganda | RIP1 | 72h  | no_wasp    | Brazil  | RIP1   | 24h   | -0.67147   | 0.2609050 | -2.57   | 0.7917  | -1.7159   | 0.3730    |
| Gh        | Uganda | RIP1 | 72h  | no_wasp    | Brazil  | RIP1   | 72h   | -0.80722   | 0.2609050 | -3.09   | 0.4175  | -1.8517   | 0.2372    |
| Gh        | Uganda | RIP1 | 72h  | no_wasp    | Brazil  | RIP2   | 24h   | -9.10210   | 0.2609050 | -34.89  | <.0001* | -10.1465  | -8.0577   |
| Gh        | Uganda | RIP1 | 72h  | no_wasp    | Brazil  | RIP2   | 72h   | -9.42489   | 0.2609050 | -36.12  | <.0001* | -10.4693  | -8.3805   |
| Gh        | Uganda | RIP1 | 72h  | no_wasp    | Brazil  | RIP3_5 | 24h   | -3.02899   | 0.2609050 | -11.61  | <.0001* | -4.0734   | -1.9846   |
| Gh        | Uganda | RIP1 | 72h  | no_wasp    | Brazil  | RIP3_5 | 72h   | -2.55967   | 0.2609050 | -9.81   | <.0001* | -3.6041   | -1.5152   |
| Gh        | Uganda | RIP1 | 72h  | no_wasp    | Uganda  | RIP1   | 24h   | -0.80291   | 0.2609050 | -3.08   | 0.4291  | -1.8473   | 0.2415    |
| Gh        | Uganda | RIP1 | 72h  | no_wasp    | Uganda  | RIP1   | 72h   | -1.28481   | 0.2609050 | -4.92   | 0.0025* | -2.3292   | -0.2404   |
| Gh        | Uganda | RIP1 | 72h  | no_wasp    | Uganda  | RIP2   | 24h   | -8.70106   | 0.2609050 | -33.35  | <.0001* | -9.7455   | -7.6566   |
| Gh        | Uganda | RIP1 | 72h  | no_wasp    | Uganda  | RIP2   | 72h   | -8.05104   | 0.2609050 | -30.86  | <.0001* | -9.0955   | -7.0066   |
| Gh        | Uganda | RIP1 | 72h  | no_wasp    | Uganda  | RIP3_5 | 24h   | -0.79936   | 0.2609050 | -3.06   | 0.4388  | -1.8438   | 0.2451    |
| Gh        | Uganda | RIP1 | 72h  | no_wasp    | Uganda  | RIP3_5 | 72h   | -2.62726   | 0.2609050 | -10.07  | <.0001* | -3.6717   | -1.5828   |
| Gh        | Uganda | RIP2 | 24h  | Gh         | Uganda  | RIP2   | 72h   | -0.45064   | 0.2609050 | -1.73   | 0.9985  | -1.4951   | 0.5938    |
| Gh        | Uganda | RIP2 | 24h  | Gh         | Uganda  | RIP3_5 | 24h   | 8.85642    | 0.2609050 | 33.94   | <.0001* | 7.8120    | 9.9008    |
| Gh        | Uganda | RIP2 | 24h  | Gh         | Uganda  | RIP3_5 | 72h   | 8.08237    | 0.2609050 | 30.98   | <.0001* | 7.0379    | 9.1268    |
| Gh        | Uganda | RIP2 | 24h  | Lh         | Brazil  | RIP1   | 24h   | 8.93125    | 0.2609050 | 34.23   | <.0001* | 7.8868    | 9.9757    |
| Gh        | Uganda | RIP2 | 24h  | Lh         | Brazil  | RIP1   | 72h   | 8.43152    | 0.2609050 | 32.32   | <.0001* | 7.3871    | 9.4759    |
| Gh        | Uganda | RIP2 | 24h  | Lh         | Brazil  | RIP2   | 24h   | -0.45449   | 0.2609050 | -1.74   | 0.9983  | -1.4989   | 0.5899    |
| Gh        | Uganda | RIP2 | 24h  | Lh         | Brazil  | RIP2   | 72h   | -0.62130   | 0.2609050 | -2.38   | 0.8925  | -1.6657   | 0.4231    |
| Gh        | Uganda | RIP2 | 24h  | Lh         | Brazil  | RIP3_5 | 24h   | 6.52667    | 0.2609050 | 25.02   | <.0001* | 5.4822    | 7.5711    |
| Gh        | Uganda | RIP2 | 24h  | Lh         | Brazil  | RIP3_5 | 72h   | 5.96025    | 0.2609050 | 22.84   | <.0001* | 4.9158    | 7.0047    |
| Gh        | Uganda | RIP2 | 24h  | Lh         | Uganda  | RIP1   | 24h   | 8.56115    | 0.2609050 | 32.81   | <.0001* | 7.5167    | 9.6056    |
| Gh        | Uganda | RIP2 | 24h  | Lh         | Uganda  | RIP1   | 72h   | 8.28064    | 0.2609050 | 31.74   | <.0001* | 7.2362    | 9.3251    |
| Gh        | Uganda | RIP2 | 24h  | Lh         | Uganda  | RIP2   | 24h   | 0.04065    | 0.2609050 | 0.16    | 1.0000  | -1.0038   | 1.0851    |
| Gh        | Uganda | RIP2 | 24h  | Lh         | Uganda  | RIP2   | 72h   | -0.34984   | 0.2609050 | -1.34   | 1.0000  | -1.3943   | 0.6946    |
| Gh        | Uganda | RIP2 | 24h  | Lh         | Uganda  | RIP3_5 | 24h   | 8.29713    | 0.2609050 | 31.80   | <.0001* | 7.2527    | 9.3416    |
| Gh        | Uganda | RIP2 | 24h  | Lh         | Uganda  | RIP3_5 | 72h   | 7.09830    | 0.2609050 | 27.21   | <.0001* | 6.0539    | 8.1427    |
| Gh        | Uganda | RIP2 | 24h  | no_wasp    | Brazil  | RIP1   | 24h   | 7.88458    | 0.2609050 | 30.22   | <.0001* | 6.8402    | 8.9290    |
| Gh        | Uganda | RIP2 | 24h  | no_wasp    | Brazil  | RIP1   | 72h   | 7.74883    | 0.2609050 | 29.70   | <.0001* | 6.7044    | 8.7933    |
| Gh        | Uganda | RIP2 | 24h  | no_wasp    | Brazil  | RIP2   | 24h   | -0.54605   | 0.2609050 | -2.09   | 0.9742  | -1.5905   | 0.4984    |
| Gh        | Uganda | RIP2 | 24h  | no_wasp    | Brazil  | RIP2   | 72h   | -0.86884   | 0.2609050 | -3.33   | 0.2684  | -1.9133   | 0.1756    |

**Generalized Regression for Value****Standard Least Squares****Multiple Comparisons for Treatment\*Strain\*RIP\*Time****Tukey HSD All Pairwise Comparisons****All Pairwise Differences**

| Treatment | Strain | RIP  | Time | -Treatment | -Strain | -RIP   | -Time | Difference | Std Error | t Ratio | Prob> t | Lower 95% | Upper 95% |
|-----------|--------|------|------|------------|---------|--------|-------|------------|-----------|---------|---------|-----------|-----------|
| Gh        | Uganda | RIP2 | 24h  | no_wasp    | Brazil  | RIP3_5 | 24h   | 5.52706    | 0.2609050 | 21.18   | <.0001* | 4.4826    | 6.5715    |
| Gh        | Uganda | RIP2 | 24h  | no_wasp    | Brazil  | RIP3_5 | 72h   | 5.99638    | 0.2609050 | 22.98   | <.0001* | 4.9519    | 7.0408    |
| Gh        | Uganda | RIP2 | 24h  | no_wasp    | Uganda  | RIP1   | 24h   | 7.75314    | 0.2609050 | 29.72   | <.0001* | 6.7087    | 8.7976    |
| Gh        | Uganda | RIP2 | 24h  | no_wasp    | Uganda  | RIP1   | 72h   | 7.27124    | 0.2609050 | 27.87   | <.0001* | 6.2268    | 8.3157    |
| Gh        | Uganda | RIP2 | 24h  | no_wasp    | Uganda  | RIP2   | 24h   | -0.14501   | 0.2609050 | -0.56   | 1.0000  | -1.1894   | 0.8994    |
| Gh        | Uganda | RIP2 | 24h  | no_wasp    | Uganda  | RIP2   | 72h   | 0.50501    | 0.2609050 | 1.94    | 0.9911  | -0.5394   | 1.5494    |
| Gh        | Uganda | RIP2 | 24h  | no_wasp    | Uganda  | RIP3_5 | 24h   | 7.75669    | 0.2609050 | 29.73   | <.0001* | 6.7123    | 8.8011    |
| Gh        | Uganda | RIP2 | 24h  | no_wasp    | Uganda  | RIP3_5 | 72h   | 5.92879    | 0.2609050 | 22.72   | <.0001* | 4.8844    | 6.9732    |
| Gh        | Uganda | RIP2 | 72h  | Gh         | Uganda  | RIP3_5 | 24h   | 9.30706    | 0.2609050 | 35.67   | <.0001* | 8.2626    | 10.3515   |
| Gh        | Uganda | RIP2 | 72h  | Gh         | Uganda  | RIP3_5 | 72h   | 8.53302    | 0.2609050 | 32.71   | <.0001* | 7.4886    | 9.5774    |
| Gh        | Uganda | RIP2 | 72h  | Lh         | Brazil  | RIP1   | 24h   | 9.38189    | 0.2609050 | 35.96   | <.0001* | 8.3375    | 10.4263   |
| Gh        | Uganda | RIP2 | 72h  | Lh         | Brazil  | RIP1   | 72h   | 8.88216    | 0.2609050 | 34.04   | <.0001* | 7.8377    | 9.9266    |
| Gh        | Uganda | RIP2 | 72h  | Lh         | Brazil  | RIP2   | 24h   | -0.00385   | 0.2609050 | -0.01   | 1.0000  | -1.0483   | 1.0406    |
| Gh        | Uganda | RIP2 | 72h  | Lh         | Brazil  | RIP2   | 72h   | -0.17065   | 0.2609050 | -0.65   | 1.0000  | -1.2151   | 0.8738    |
| Gh        | Uganda | RIP2 | 72h  | Lh         | Brazil  | RIP3_5 | 24h   | 6.97732    | 0.2609050 | 26.74   | <.0001* | 5.9329    | 8.0217    |
| Gh        | Uganda | RIP2 | 72h  | Lh         | Brazil  | RIP3_5 | 72h   | 6.41089    | 0.2609050 | 24.57   | <.0001* | 5.3665    | 7.4553    |
| Gh        | Uganda | RIP2 | 72h  | Lh         | Uganda  | RIP1   | 24h   | 9.01180    | 0.2609050 | 34.54   | <.0001* | 7.9674    | 10.0562   |
| Gh        | Uganda | RIP2 | 72h  | Lh         | Uganda  | RIP1   | 72h   | 8.73128    | 0.2609050 | 33.47   | <.0001* | 7.6868    | 9.7757    |
| Gh        | Uganda | RIP2 | 72h  | Lh         | Uganda  | RIP2   | 24h   | 0.49129    | 0.2609050 | 1.88    | 0.9941  | -0.5531   | 1.5357    |
| Gh        | Uganda | RIP2 | 72h  | Lh         | Uganda  | RIP2   | 72h   | 0.10080    | 0.2609050 | 0.39    | 1.0000  | -0.9436   | 1.1452    |
| Gh        | Uganda | RIP2 | 72h  | Lh         | Uganda  | RIP3_5 | 24h   | 8.74777    | 0.2609050 | 33.53   | <.0001* | 7.7033    | 9.7922    |
| Gh        | Uganda | RIP2 | 72h  | Lh         | Uganda  | RIP3_5 | 72h   | 7.54894    | 0.2609050 | 28.93   | <.0001* | 6.5045    | 8.5934    |
| Gh        | Uganda | RIP2 | 72h  | no_wasp    | Brazil  | RIP1   | 24h   | 8.33523    | 0.2609050 | 31.95   | <.0001* | 7.2908    | 9.3797    |
| Gh        | Uganda | RIP2 | 72h  | no_wasp    | Brazil  | RIP1   | 72h   | 8.19948    | 0.2609050 | 31.43   | <.0001* | 7.1550    | 9.2439    |
| Gh        | Uganda | RIP2 | 72h  | no_wasp    | Brazil  | RIP2   | 24h   | -0.09540   | 0.2609050 | -0.37   | 1.0000  | -1.1398   | 0.9490    |
| Gh        | Uganda | RIP2 | 72h  | no_wasp    | Brazil  | RIP2   | 72h   | -0.41820   | 0.2609050 | -1.60   | 0.9996  | -1.4626   | 0.6262    |
| Gh        | Uganda | RIP2 | 72h  | no_wasp    | Brazil  | RIP3_5 | 24h   | 5.97770    | 0.2609050 | 22.91   | <.0001* | 4.9333    | 7.0221    |
| Gh        | Uganda | RIP2 | 72h  | no_wasp    | Brazil  | RIP3_5 | 72h   | 6.44702    | 0.2609050 | 24.71   | <.0001* | 5.4026    | 7.4915    |
| Gh        | Uganda | RIP2 | 72h  | no_wasp    | Uganda  | RIP1   | 24h   | 8.20378    | 0.2609050 | 31.44   | <.0001* | 7.1594    | 9.2482    |
| Gh        | Uganda | RIP2 | 72h  | no_wasp    | Uganda  | RIP1   | 72h   | 7.72188    | 0.2609050 | 29.60   | <.0001* | 6.6774    | 8.7663    |
| Gh        | Uganda | RIP2 | 72h  | no_wasp    | Uganda  | RIP2   | 24h   | 0.30564    | 0.2609050 | 1.17    | 1.0000  | -0.7388   | 1.3501    |

**Generalized Regression for Value**

**Standard Least Squares**

**Multiple Comparisons for Treatment\*Strain\*RIP\*Time**

**Tukey HSD All Pairwise Comparisons**

**All Pairwise Differences**

| Treatment | Strain | RIP    | Time | -Treatment | -Strain | -RIP   | -Time | Difference | Std Error | t Ratio | Prob> t | Lower 95% | Upper 95% |
|-----------|--------|--------|------|------------|---------|--------|-------|------------|-----------|---------|---------|-----------|-----------|
| Gh        | Uganda | RIP2   | 72h  | no_wasp    | Uganda  | RIP2   | 72h   | 0.95565    | 0.2609050 | 3.66    | 0.1254  | -0.0888   | 2.0001    |
| Gh        | Uganda | RIP2   | 72h  | no_wasp    | Uganda  | RIP3_5 | 24h   | 8.20733    | 0.2609050 | 31.46   | <.0001* | 7.1629    | 9.2518    |
| Gh        | Uganda | RIP2   | 72h  | no_wasp    | Uganda  | RIP3_5 | 72h   | 6.37943    | 0.2609050 | 24.45   | <.0001* | 5.3350    | 7.4239    |
| Gh        | Uganda | RIP3_5 | 24h  | Gh         | Uganda  | RIP3_5 | 72h   | -0.77405   | 0.2609050 | -2.97   | 0.5099  | -1.8185   | 0.2704    |
| Gh        | Uganda | RIP3_5 | 24h  | Lh         | Brazil  | RIP1   | 24h   | 0.07483    | 0.2609050 | 0.29    | 1.0000  | -0.9696   | 1.1193    |
| Gh        | Uganda | RIP3_5 | 24h  | Lh         | Brazil  | RIP1   | 72h   | -0.42490   | 0.2609050 | -1.63   | 0.9995  | -1.4693   | 0.6195    |
| Gh        | Uganda | RIP3_5 | 24h  | Lh         | Brazil  | RIP2   | 24h   | -9.31091   | 0.2609050 | -35.69  | <.0001* | -10.3553  | -8.2665   |
| Gh        | Uganda | RIP3_5 | 24h  | Lh         | Brazil  | RIP2   | 72h   | -9.47772   | 0.2609050 | -36.33  | <.0001* | -10.5221  | -8.4333   |
| Gh        | Uganda | RIP3_5 | 24h  | Lh         | Brazil  | RIP3_5 | 24h   | -2.32975   | 0.2609050 | -8.93   | <.0001* | -3.3742   | -1.2853   |
| Gh        | Uganda | RIP3_5 | 24h  | Lh         | Brazil  | RIP3_5 | 72h   | -2.89617   | 0.2609050 | -11.10  | <.0001* | -3.9406   | -1.8517   |
| Gh        | Uganda | RIP3_5 | 24h  | Lh         | Uganda  | RIP1   | 24h   | -0.29527   | 0.2609050 | -1.13   | 1.0000  | -1.3397   | 0.7492    |
| Gh        | Uganda | RIP3_5 | 24h  | Lh         | Uganda  | RIP1   | 72h   | -0.57578   | 0.2609050 | -2.21   | 0.9512  | -1.6202   | 0.4686    |
| Gh        | Uganda | RIP3_5 | 24h  | Lh         | Uganda  | RIP2   | 24h   | -8.81577   | 0.2609050 | -33.79  | <.0001* | -9.8602   | -7.7713   |
| Gh        | Uganda | RIP3_5 | 24h  | Lh         | Uganda  | RIP2   | 72h   | -9.20626   | 0.2609050 | -35.29  | <.0001* | -10.2507  | -8.1618   |
| Gh        | Uganda | RIP3_5 | 24h  | Lh         | Uganda  | RIP3_5 | 24h   | -0.55929   | 0.2609050 | -2.14   | 0.9653  | -1.6037   | 0.4851    |
| Gh        | Uganda | RIP3_5 | 24h  | Lh         | Uganda  | RIP3_5 | 72h   | -1.75812   | 0.2609050 | -6.74   | <.0001* | -2.8025   | -0.7137   |
| Gh        | Uganda | RIP3_5 | 24h  | no_wasp    | Brazil  | RIP1   | 24h   | -0.97184   | 0.2609050 | -3.72   | 0.1071  | -2.0163   | 0.0726    |
| Gh        | Uganda | RIP3_5 | 24h  | no_wasp    | Brazil  | RIP1   | 72h   | -1.10759   | 0.2609050 | -4.25   | 0.0242* | -2.1520   | -0.0632   |
| Gh        | Uganda | RIP3_5 | 24h  | no_wasp    | Brazil  | RIP2   | 24h   | -9.40246   | 0.2609050 | -36.04  | <.0001* | -10.4469  | -8.3580   |
| Gh        | Uganda | RIP3_5 | 24h  | no_wasp    | Brazil  | RIP2   | 72h   | -9.72526   | 0.2609050 | -37.28  | <.0001* | -10.7697  | -8.6808   |
| Gh        | Uganda | RIP3_5 | 24h  | no_wasp    | Brazil  | RIP3_5 | 24h   | -3.32936   | 0.2609050 | -12.76  | <.0001* | -4.3738   | -2.2849   |
| Gh        | Uganda | RIP3_5 | 24h  | no_wasp    | Brazil  | RIP3_5 | 72h   | -2.86004   | 0.2609050 | -10.96  | <.0001* | -3.9045   | -1.8156   |
| Gh        | Uganda | RIP3_5 | 24h  | no_wasp    | Uganda  | RIP1   | 24h   | -1.10328   | 0.2609050 | -4.23   | 0.0255* | -2.1477   | -0.0588   |
| Gh        | Uganda | RIP3_5 | 24h  | no_wasp    | Uganda  | RIP1   | 72h   | -1.58518   | 0.2609050 | -6.08   | <.0001* | -2.6296   | -0.5408   |
| Gh        | Uganda | RIP3_5 | 24h  | no_wasp    | Uganda  | RIP2   | 24h   | -9.00143   | 0.2609050 | -34.50  | <.0001* | -10.0459  | -7.9570   |
| Gh        | Uganda | RIP3_5 | 24h  | no_wasp    | Uganda  | RIP2   | 72h   | -8.35141   | 0.2609050 | -32.01  | <.0001* | -9.3958   | -7.3070   |
| Gh        | Uganda | RIP3_5 | 24h  | no_wasp    | Uganda  | RIP3_5 | 24h   | -1.09973   | 0.2609050 | -4.22   | 0.0266* | -2.1442   | -0.0553   |
| Gh        | Uganda | RIP3_5 | 24h  | no_wasp    | Uganda  | RIP3_5 | 72h   | -2.92763   | 0.2609050 | -11.22  | <.0001* | -3.9721   | -1.8832   |
| Gh        | Uganda | RIP3_5 | 72h  | Lh         | Brazil  | RIP1   | 24h   | 0.84888    | 0.2609050 | 3.25    | 0.3127  | -0.1956   | 1.8933    |
| Gh        | Uganda | RIP3_5 | 72h  | Lh         | Brazil  | RIP1   | 72h   | 0.34915    | 0.2609050 | 1.34    | 1.0000  | -0.6953   | 1.3936    |
| Gh        | Uganda | RIP3_5 | 72h  | Lh         | Brazil  | RIP2   | 24h   | -8.53686   | 0.2609050 | -32.72  | <.0001* | -9.5813   | -7.4924   |

**Generalized Regression for Value****Standard Least Squares****Multiple Comparisons for Treatment\*Strain\*RIP\*Time****Tukey HSD All Pairwise Comparisons****All Pairwise Differences**

| Treatment | Strain | RIP    | Time | -Treatment | -Strain | -RIP   | -Time | Difference | Std Error | t Ratio | Prob> t | Lower 95% | Upper 95% |
|-----------|--------|--------|------|------------|---------|--------|-------|------------|-----------|---------|---------|-----------|-----------|
| Gh        | Uganda | RIP3_5 | 72h  | Lh         | Brazil  | RIP2   | 72h   | -8.70367   | 0.2609050 | -33.36  | <.0001* | -9.7481   | -7.6592   |
| Gh        | Uganda | RIP3_5 | 72h  | Lh         | Brazil  | RIP3_5 | 24h   | -1.55570   | 0.2609050 | -5.96   | <.0001* | -2.6001   | -0.5113   |
| Gh        | Uganda | RIP3_5 | 72h  | Lh         | Brazil  | RIP3_5 | 72h   | -2.12212   | 0.2609050 | -8.13   | <.0001* | -3.1666   | -1.0777   |
| Gh        | Uganda | RIP3_5 | 72h  | Lh         | Uganda  | RIP1   | 24h   | 0.47878    | 0.2609050 | 1.84    | 0.9960  | -0.5657   | 1.5232    |
| Gh        | Uganda | RIP3_5 | 72h  | Lh         | Uganda  | RIP1   | 72h   | 0.19826    | 0.2609050 | 0.76    | 1.0000  | -0.8462   | 1.2427    |
| Gh        | Uganda | RIP3_5 | 72h  | Lh         | Uganda  | RIP2   | 24h   | -8.04172   | 0.2609050 | -30.82  | <.0001* | -9.0862   | -6.9973   |
| Gh        | Uganda | RIP3_5 | 72h  | Lh         | Uganda  | RIP2   | 72h   | -8.43221   | 0.2609050 | -32.32  | <.0001* | -9.4766   | -7.3878   |
| Gh        | Uganda | RIP3_5 | 72h  | Lh         | Uganda  | RIP3_5 | 24h   | 0.21476    | 0.2609050 | 0.82    | 1.0000  | -0.8297   | 1.2592    |
| Gh        | Uganda | RIP3_5 | 72h  | Lh         | Uganda  | RIP3_5 | 72h   | -0.98407   | 0.2609050 | -3.77   | 0.0948  | -2.0285   | 0.0604    |
| Gh        | Uganda | RIP3_5 | 72h  | no_wasp    | Brazil  | RIP1   | 24h   | -0.19779   | 0.2609050 | -0.76   | 1.0000  | -1.2422   | 0.8466    |
| Gh        | Uganda | RIP3_5 | 72h  | no_wasp    | Brazil  | RIP1   | 72h   | -0.33354   | 0.2609050 | -1.28   | 1.0000  | -1.3780   | 0.7109    |
| Gh        | Uganda | RIP3_5 | 72h  | no_wasp    | Brazil  | RIP2   | 24h   | -8.62842   | 0.2609050 | -33.07  | <.0001* | -9.6728   | -7.5840   |
| Gh        | Uganda | RIP3_5 | 72h  | no_wasp    | Brazil  | RIP2   | 72h   | -8.95121   | 0.2609050 | -34.31  | <.0001* | -9.9956   | -7.9068   |
| Gh        | Uganda | RIP3_5 | 72h  | no_wasp    | Brazil  | RIP3_5 | 24h   | -2.55531   | 0.2609050 | -9.79   | <.0001* | -3.5997   | -1.5109   |
| Gh        | Uganda | RIP3_5 | 72h  | no_wasp    | Brazil  | RIP3_5 | 72h   | -2.08599   | 0.2609050 | -8.00   | <.0001* | -3.1304   | -1.0416   |
| Gh        | Uganda | RIP3_5 | 72h  | no_wasp    | Uganda  | RIP1   | 24h   | -0.32923   | 0.2609050 | -1.26   | 1.0000  | -1.3737   | 0.7152    |
| Gh        | Uganda | RIP3_5 | 72h  | no_wasp    | Uganda  | RIP1   | 72h   | -0.81113   | 0.2609050 | -3.11   | 0.4070  | -1.8556   | 0.2333    |
| Gh        | Uganda | RIP3_5 | 72h  | no_wasp    | Uganda  | RIP2   | 24h   | -8.22738   | 0.2609050 | -31.53  | <.0001* | -9.2718   | -7.1829   |
| Gh        | Uganda | RIP3_5 | 72h  | no_wasp    | Uganda  | RIP2   | 72h   | -7.57736   | 0.2609050 | -29.04  | <.0001* | -8.6218   | -6.5329   |
| Gh        | Uganda | RIP3_5 | 72h  | no_wasp    | Uganda  | RIP3_5 | 24h   | -0.32568   | 0.2609050 | -1.25   | 1.0000  | -1.3701   | 0.7187    |
| Gh        | Uganda | RIP3_5 | 72h  | no_wasp    | Uganda  | RIP3_5 | 72h   | -2.15358   | 0.2609050 | -8.25   | <.0001* | -3.1980   | -1.1092   |
| Lh        | Brazil | RIP1   | 24h  | Lh         | Brazil  | RIP1   | 72h   | -0.49973   | 0.2609050 | -1.92   | 0.9923  | -1.5442   | 0.5447    |
| Lh        | Brazil | RIP1   | 24h  | Lh         | Brazil  | RIP2   | 24h   | -9.38574   | 0.2609050 | -35.97  | <.0001* | -10.4302  | -8.3413   |
| Lh        | Brazil | RIP1   | 24h  | Lh         | Brazil  | RIP2   | 72h   | -9.55255   | 0.2609050 | -36.61  | <.0001* | -10.5970  | -8.5081   |
| Lh        | Brazil | RIP1   | 24h  | Lh         | Brazil  | RIP3_5 | 24h   | -2.40458   | 0.2609050 | -9.22   | <.0001* | -3.4490   | -1.3601   |
| Lh        | Brazil | RIP1   | 24h  | Lh         | Brazil  | RIP3_5 | 72h   | -2.97100   | 0.2609050 | -11.39  | <.0001* | -4.0154   | -1.9266   |
| Lh        | Brazil | RIP1   | 24h  | Lh         | Uganda  | RIP1   | 24h   | -0.37010   | 0.2609050 | -1.42   | 1.0000  | -1.4145   | 0.6743    |
| Lh        | Brazil | RIP1   | 24h  | Lh         | Uganda  | RIP1   | 72h   | -0.65061   | 0.2609050 | -2.49   | 0.8380  | -1.6950   | 0.3938    |
| Lh        | Brazil | RIP1   | 24h  | Lh         | Uganda  | RIP2   | 24h   | -8.89060   | 0.2609050 | -34.08  | <.0001* | -9.9350   | -7.8462   |
| Lh        | Brazil | RIP1   | 24h  | Lh         | Uganda  | RIP2   | 72h   | -9.28109   | 0.2609050 | -35.57  | <.0001* | -10.3255  | -8.2367   |
| Lh        | Brazil | RIP1   | 24h  | Lh         | Uganda  | RIP3_5 | 24h   | -0.63412   | 0.2609050 | -2.43   | 0.8703  | -1.6786   | 0.4103    |

## Generalized Regression for Value

## Standard Least Squares

## Multiple Comparisons for Treatment\*Strain\*RIP\*Time

## Tukey HSD All Pairwise Comparisons

## All Pairwise Differences

| Treatment | Strain | RIP  | Time | -Treatment | -Strain | -RIP   | -Time | Difference | Std Error | t Ratio | Prob> t | Lower 95% | Upper 95% |
|-----------|--------|------|------|------------|---------|--------|-------|------------|-----------|---------|---------|-----------|-----------|
| Lh        | Brazil | RIP1 | 24h  | Lh         | Uganda  | RIP3_5 | 72h   | -1.83295   | 0.2609050 | -7.03   | <.0001* | -2.8774   | -0.7885   |
| Lh        | Brazil | RIP1 | 24h  | no_wasp    | Brazil  | RIP1   | 24h   | -1.04667   | 0.2609050 | -4.01   | 0.0488* | -2.0911   | -0.0022   |
| Lh        | Brazil | RIP1 | 24h  | no_wasp    | Brazil  | RIP1   | 72h   | -1.18242   | 0.2609050 | -4.53   | 0.0096* | -2.2269   | -0.1380   |
| Lh        | Brazil | RIP1 | 24h  | no_wasp    | Brazil  | RIP2   | 24h   | -9.47730   | 0.2609050 | -36.32  | <.0001* | -10.5217  | -8.4329   |
| Lh        | Brazil | RIP1 | 24h  | no_wasp    | Brazil  | RIP2   | 72h   | -9.80009   | 0.2609050 | -37.56  | <.0001* | -10.8445  | -8.7557   |
| Lh        | Brazil | RIP1 | 24h  | no_wasp    | Brazil  | RIP3_5 | 24h   | -3.40419   | 0.2609050 | -13.05  | <.0001* | -4.4486   | -2.3598   |
| Lh        | Brazil | RIP1 | 24h  | no_wasp    | Brazil  | RIP3_5 | 72h   | -2.93487   | 0.2609050 | -11.25  | <.0001* | -3.9793   | -1.8904   |
| Lh        | Brazil | RIP1 | 24h  | no_wasp    | Uganda  | RIP1   | 24h   | -1.17811   | 0.2609050 | -4.52   | 0.0101* | -2.2225   | -0.1337   |
| Lh        | Brazil | RIP1 | 24h  | no_wasp    | Uganda  | RIP1   | 72h   | -1.66001   | 0.2609050 | -6.36   | <.0001* | -2.7044   | -0.6156   |
| Lh        | Brazil | RIP1 | 24h  | no_wasp    | Uganda  | RIP2   | 24h   | -9.07626   | 0.2609050 | -34.79  | <.0001* | -10.1207  | -8.0318   |
| Lh        | Brazil | RIP1 | 24h  | no_wasp    | Uganda  | RIP2   | 72h   | -8.42624   | 0.2609050 | -32.30  | <.0001* | -9.4707   | -7.3818   |
| Lh        | Brazil | RIP1 | 24h  | no_wasp    | Uganda  | RIP3_5 | 24h   | -1.17456   | 0.2609050 | -4.50   | 0.0106* | -2.2190   | -0.1301   |
| Lh        | Brazil | RIP1 | 24h  | no_wasp    | Uganda  | RIP3_5 | 72h   | -3.00246   | 0.2609050 | -11.51  | <.0001* | -4.0469   | -1.9580   |
| Lh        | Brazil | RIP1 | 72h  | Lh         | Brazil  | RIP2   | 24h   | -8.88601   | 0.2609050 | -34.06  | <.0001* | -9.9304   | -7.8416   |
| Lh        | Brazil | RIP1 | 72h  | Lh         | Brazil  | RIP2   | 72h   | -9.05282   | 0.2609050 | -34.70  | <.0001* | -10.0972  | -8.0084   |
| Lh        | Brazil | RIP1 | 72h  | Lh         | Brazil  | RIP3_5 | 24h   | -1.90485   | 0.2609050 | -7.30   | <.0001* | -2.9493   | -0.8604   |
| Lh        | Brazil | RIP1 | 72h  | Lh         | Brazil  | RIP3_5 | 72h   | -2.47127   | 0.2609050 | -9.47   | <.0001* | -3.5157   | -1.4268   |
| Lh        | Brazil | RIP1 | 72h  | Lh         | Uganda  | RIP1   | 24h   | 0.12963    | 0.2609050 | 0.50    | 1.0000  | -0.9148   | 1.1741    |
| Lh        | Brazil | RIP1 | 72h  | Lh         | Uganda  | RIP1   | 72h   | -0.15088   | 0.2609050 | -0.58   | 1.0000  | -1.1953   | 0.8935    |
| Lh        | Brazil | RIP1 | 72h  | Lh         | Uganda  | RIP2   | 24h   | -8.39087   | 0.2609050 | -32.16  | <.0001* | -9.4353   | -7.3464   |
| Lh        | Brazil | RIP1 | 72h  | Lh         | Uganda  | RIP2   | 72h   | -8.78136   | 0.2609050 | -33.66  | <.0001* | -9.8258   | -7.7369   |
| Lh        | Brazil | RIP1 | 72h  | Lh         | Uganda  | RIP3_5 | 24h   | -0.13439   | 0.2609050 | -0.52   | 1.0000  | -1.1788   | 0.9100    |
| Lh        | Brazil | RIP1 | 72h  | Lh         | Uganda  | RIP3_5 | 72h   | -1.33322   | 0.2609050 | -5.11   | 0.0013* | -2.3777   | -0.2888   |
| Lh        | Brazil | RIP1 | 72h  | no_wasp    | Brazil  | RIP1   | 24h   | -0.54694   | 0.2609050 | -2.10   | 0.9736  | -1.5914   | 0.4975    |
| Lh        | Brazil | RIP1 | 72h  | no_wasp    | Brazil  | RIP1   | 72h   | -0.68269   | 0.2609050 | -2.62   | 0.7644  | -1.7271   | 0.3617    |
| Lh        | Brazil | RIP1 | 72h  | no_wasp    | Brazil  | RIP2   | 24h   | -8.97757   | 0.2609050 | -34.41  | <.0001* | -10.0220  | -7.9331   |
| Lh        | Brazil | RIP1 | 72h  | no_wasp    | Brazil  | RIP2   | 72h   | -9.30036   | 0.2609050 | -35.65  | <.0001* | -10.3448  | -8.2559   |
| Lh        | Brazil | RIP1 | 72h  | no_wasp    | Brazil  | RIP3_5 | 24h   | -2.90446   | 0.2609050 | -11.13  | <.0001* | -3.9489   | -1.8600   |
| Lh        | Brazil | RIP1 | 72h  | no_wasp    | Brazil  | RIP3_5 | 72h   | -2.43514   | 0.2609050 | -9.33   | <.0001* | -3.4796   | -1.3907   |
| Lh        | Brazil | RIP1 | 72h  | no_wasp    | Uganda  | RIP1   | 24h   | -0.67838   | 0.2609050 | -2.60   | 0.7751  | -1.7228   | 0.3661    |
| Lh        | Brazil | RIP1 | 72h  | no_wasp    | Uganda  | RIP1   | 72h   | -1.16028   | 0.2609050 | -4.45   | 0.0127* | -2.2047   | -0.1159   |

**Generalized Regression for Value**

**Standard Least Squares**

**Multiple Comparisons for Treatment\*Strain\*RIP\*Time**

**Tukey HSD All Pairwise Comparisons**

**All Pairwise Differences**

| Treatment | Strain | RIP  | Time | -Treatment | -Strain | -RIP   | -Time | Difference | Std Error | t Ratio | Prob> t | Lower 95% | Upper 95% |
|-----------|--------|------|------|------------|---------|--------|-------|------------|-----------|---------|---------|-----------|-----------|
| Lh        | Brazil | RIP1 | 72h  | no_wasp    | Uganda  | RIP2   | 24h   | -8.57653   | 0.2609050 | -32.87  | <.0001* | -9.6210   | -7.5321   |
| Lh        | Brazil | RIP1 | 72h  | no_wasp    | Uganda  | RIP2   | 72h   | -7.92651   | 0.2609050 | -30.38  | <.0001* | -8.9709   | -6.8821   |
| Lh        | Brazil | RIP1 | 72h  | no_wasp    | Uganda  | RIP3_5 | 24h   | -0.67483   | 0.2609050 | -2.59   | 0.7837  | -1.7193   | 0.3696    |
| Lh        | Brazil | RIP1 | 72h  | no_wasp    | Uganda  | RIP3_5 | 72h   | -2.50273   | 0.2609050 | -9.59   | <.0001* | -3.5472   | -1.4583   |
| Lh        | Brazil | RIP2 | 24h  | Lh         | Brazil  | RIP2   | 72h   | -0.16681   | 0.2609050 | -0.64   | 1.0000  | -1.2112   | 0.8776    |
| Lh        | Brazil | RIP2 | 24h  | Lh         | Brazil  | RIP3_5 | 24h   | 6.98116    | 0.2609050 | 26.76   | <.0001* | 5.9367    | 8.0256    |
| Lh        | Brazil | RIP2 | 24h  | Lh         | Brazil  | RIP3_5 | 72h   | 6.41474    | 0.2609050 | 24.59   | <.0001* | 5.3703    | 7.4592    |
| Lh        | Brazil | RIP2 | 24h  | Lh         | Uganda  | RIP1   | 24h   | 9.01564    | 0.2609050 | 34.56   | <.0001* | 7.9712    | 10.0601   |
| Lh        | Brazil | RIP2 | 24h  | Lh         | Uganda  | RIP1   | 72h   | 8.73513    | 0.2609050 | 33.48   | <.0001* | 7.6907    | 9.7796    |
| Lh        | Brazil | RIP2 | 24h  | Lh         | Uganda  | RIP2   | 24h   | 0.49514    | 0.2609050 | 1.90    | 0.9933  | -0.5493   | 1.5396    |
| Lh        | Brazil | RIP2 | 24h  | Lh         | Uganda  | RIP2   | 72h   | 0.10465    | 0.2609050 | 0.40    | 1.0000  | -0.9398   | 1.1491    |
| Lh        | Brazil | RIP2 | 24h  | Lh         | Uganda  | RIP3_5 | 24h   | 8.75162    | 0.2609050 | 33.54   | <.0001* | 7.7072    | 9.7961    |
| Lh        | Brazil | RIP2 | 24h  | Lh         | Uganda  | RIP3_5 | 72h   | 7.55279    | 0.2609050 | 28.95   | <.0001* | 6.5084    | 8.5972    |
| Lh        | Brazil | RIP2 | 24h  | no_wasp    | Brazil  | RIP1   | 24h   | 8.33908    | 0.2609050 | 31.96   | <.0001* | 7.2946    | 9.3835    |
| Lh        | Brazil | RIP2 | 24h  | no_wasp    | Brazil  | RIP1   | 72h   | 8.20332    | 0.2609050 | 31.44   | <.0001* | 7.1589    | 9.2478    |
| Lh        | Brazil | RIP2 | 24h  | no_wasp    | Brazil  | RIP2   | 24h   | -0.09155   | 0.2609050 | -0.35   | 1.0000  | -1.1360   | 0.9529    |
| Lh        | Brazil | RIP2 | 24h  | no_wasp    | Brazil  | RIP2   | 72h   | -0.41435   | 0.2609050 | -1.59   | 0.9997  | -1.4588   | 0.6301    |
| Lh        | Brazil | RIP2 | 24h  | no_wasp    | Brazil  | RIP3_5 | 24h   | 5.98155    | 0.2609050 | 22.93   | <.0001* | 4.9371    | 7.0260    |
| Lh        | Brazil | RIP2 | 24h  | no_wasp    | Brazil  | RIP3_5 | 72h   | 6.45087    | 0.2609050 | 24.72   | <.0001* | 5.4064    | 7.4953    |
| Lh        | Brazil | RIP2 | 24h  | no_wasp    | Uganda  | RIP1   | 24h   | 8.20763    | 0.2609050 | 31.46   | <.0001* | 7.1632    | 9.2521    |
| Lh        | Brazil | RIP2 | 24h  | no_wasp    | Uganda  | RIP1   | 72h   | 7.72573    | 0.2609050 | 29.61   | <.0001* | 6.6813    | 8.7702    |
| Lh        | Brazil | RIP2 | 24h  | no_wasp    | Uganda  | RIP2   | 24h   | 0.30949    | 0.2609050 | 1.19    | 1.0000  | -0.7349   | 1.3539    |
| Lh        | Brazil | RIP2 | 24h  | no_wasp    | Uganda  | RIP2   | 72h   | 0.95950    | 0.2609050 | 3.68    | 0.1208  | -0.0849   | 2.0039    |
| Lh        | Brazil | RIP2 | 24h  | no_wasp    | Uganda  | RIP3_5 | 24h   | 8.21118    | 0.2609050 | 31.47   | <.0001* | 7.1667    | 9.2556    |
| Lh        | Brazil | RIP2 | 24h  | no_wasp    | Uganda  | RIP3_5 | 72h   | 6.38328    | 0.2609050 | 24.47   | <.0001* | 5.3388    | 7.4277    |
| Lh        | Brazil | RIP2 | 72h  | Lh         | Brazil  | RIP3_5 | 24h   | 7.14797    | 0.2609050 | 27.40   | <.0001* | 6.1035    | 8.1924    |
| Lh        | Brazil | RIP2 | 72h  | Lh         | Brazil  | RIP3_5 | 72h   | 6.58155    | 0.2609050 | 25.23   | <.0001* | 5.5371    | 7.6260    |
| Lh        | Brazil | RIP2 | 72h  | Lh         | Uganda  | RIP1   | 24h   | 9.18245    | 0.2609050 | 35.19   | <.0001* | 8.1380    | 10.2269   |
| Lh        | Brazil | RIP2 | 72h  | Lh         | Uganda  | RIP1   | 72h   | 8.90193    | 0.2609050 | 34.12   | <.0001* | 7.8575    | 9.9464    |
| Lh        | Brazil | RIP2 | 72h  | Lh         | Uganda  | RIP2   | 24h   | 0.66195    | 0.2609050 | 2.54    | 0.8135  | -0.3825   | 1.7064    |
| Lh        | Brazil | RIP2 | 72h  | Lh         | Uganda  | RIP2   | 72h   | 0.27146    | 0.2609050 | 1.04    | 1.0000  | -0.7730   | 1.3159    |

**Generalized Regression for Value****Standard Least Squares****Multiple Comparisons for Treatment\*Strain\*RIP\*Time****Tukey HSD All Pairwise Comparisons****All Pairwise Differences**

| Treatment | Strain | RIP    | Time | -Treatment | -Strain | -RIP   | -Time | Difference | Std Error | t Ratio | Prob> t | Lower 95% | Upper 95% |
|-----------|--------|--------|------|------------|---------|--------|-------|------------|-----------|---------|---------|-----------|-----------|
| Lh        | Brazil | RIP2   | 72h  | Lh         | Uganda  | RIP3_5 | 24h   | 8.91843    | 0.2609050 | 34.18   | <.0001* | 7.8740    | 9.9629    |
| Lh        | Brazil | RIP2   | 72h  | Lh         | Uganda  | RIP3_5 | 72h   | 7.71960    | 0.2609050 | 29.59   | <.0001* | 6.6752    | 8.7640    |
| Lh        | Brazil | RIP2   | 72h  | no_wasp    | Brazil  | RIP1   | 24h   | 8.50588    | 0.2609050 | 32.60   | <.0001* | 7.4615    | 9.5503    |
| Lh        | Brazil | RIP2   | 72h  | no_wasp    | Brazil  | RIP1   | 72h   | 8.37013    | 0.2609050 | 32.08   | <.0001* | 7.3257    | 9.4146    |
| Lh        | Brazil | RIP2   | 72h  | no_wasp    | Brazil  | RIP2   | 24h   | 0.07525    | 0.2609050 | 0.29    | 1.0000  | -0.9692   | 1.1197    |
| Lh        | Brazil | RIP2   | 72h  | no_wasp    | Brazil  | RIP2   | 72h   | -0.24754   | 0.2609050 | -0.95   | 1.0000  | -1.2920   | 0.7969    |
| Lh        | Brazil | RIP2   | 72h  | no_wasp    | Brazil  | RIP3_5 | 24h   | 6.14836    | 0.2609050 | 23.57   | <.0001* | 5.1039    | 7.1928    |
| Lh        | Brazil | RIP2   | 72h  | no_wasp    | Brazil  | RIP3_5 | 72h   | 6.61768    | 0.2609050 | 25.36   | <.0001* | 5.5732    | 7.6621    |
| Lh        | Brazil | RIP2   | 72h  | no_wasp    | Uganda  | RIP1   | 24h   | 8.37444    | 0.2609050 | 32.10   | <.0001* | 7.3300    | 9.4189    |
| Lh        | Brazil | RIP2   | 72h  | no_wasp    | Uganda  | RIP1   | 72h   | 7.89254    | 0.2609050 | 30.25   | <.0001* | 6.8481    | 8.9370    |
| Lh        | Brazil | RIP2   | 72h  | no_wasp    | Uganda  | RIP2   | 24h   | 0.47629    | 0.2609050 | 1.83    | 0.9963  | -0.5681   | 1.5207    |
| Lh        | Brazil | RIP2   | 72h  | no_wasp    | Uganda  | RIP2   | 72h   | 1.12631    | 0.2609050 | 4.32    | 0.0193* | 0.0819    | 2.1707    |
| Lh        | Brazil | RIP2   | 72h  | no_wasp    | Uganda  | RIP3_5 | 24h   | 8.37799    | 0.2609050 | 32.11   | <.0001* | 7.3336    | 9.4224    |
| Lh        | Brazil | RIP2   | 72h  | no_wasp    | Uganda  | RIP3_5 | 72h   | 6.55009    | 0.2609050 | 25.11   | <.0001* | 5.5057    | 7.5945    |
| Lh        | Brazil | RIP3_5 | 24h  | Lh         | Brazil  | RIP3_5 | 72h   | -0.56642   | 0.2609050 | -2.17   | 0.9596  | -1.6109   | 0.4780    |
| Lh        | Brazil | RIP3_5 | 24h  | Lh         | Uganda  | RIP1   | 24h   | 2.03448    | 0.2609050 | 7.80    | <.0001* | 0.9900    | 3.0789    |
| Lh        | Brazil | RIP3_5 | 24h  | Lh         | Uganda  | RIP1   | 72h   | 1.75396    | 0.2609050 | 6.72    | <.0001* | 0.7095    | 2.7984    |
| Lh        | Brazil | RIP3_5 | 24h  | Lh         | Uganda  | RIP2   | 24h   | -6.48602   | 0.2609050 | -24.86  | <.0001* | -7.5305   | -5.4416   |
| Lh        | Brazil | RIP3_5 | 24h  | Lh         | Uganda  | RIP2   | 72h   | -6.87651   | 0.2609050 | -26.36  | <.0001* | -7.9209   | -5.8321   |
| Lh        | Brazil | RIP3_5 | 24h  | Lh         | Uganda  | RIP3_5 | 24h   | 1.77046    | 0.2609050 | 6.79    | <.0001* | 0.7260    | 2.8149    |
| Lh        | Brazil | RIP3_5 | 24h  | Lh         | Uganda  | RIP3_5 | 72h   | 0.57163    | 0.2609050 | 2.19    | 0.9551  | -0.4728   | 1.6161    |
| Lh        | Brazil | RIP3_5 | 24h  | no_wasp    | Brazil  | RIP1   | 24h   | 1.35791    | 0.2609050 | 5.20    | 0.0009* | 0.3135    | 2.4023    |
| Lh        | Brazil | RIP3_5 | 24h  | no_wasp    | Brazil  | RIP1   | 72h   | 1.22216    | 0.2609050 | 4.68    | 0.0057* | 0.1777    | 2.2666    |
| Lh        | Brazil | RIP3_5 | 24h  | no_wasp    | Brazil  | RIP2   | 24h   | -7.07272   | 0.2609050 | -27.11  | <.0001* | -8.1171   | -6.0283   |
| Lh        | Brazil | RIP3_5 | 24h  | no_wasp    | Brazil  | RIP2   | 72h   | -7.39551   | 0.2609050 | -28.35  | <.0001* | -8.4399   | -6.3511   |
| Lh        | Brazil | RIP3_5 | 24h  | no_wasp    | Brazil  | RIP3_5 | 24h   | -0.99961   | 0.2609050 | -3.83   | 0.0808  | -2.0440   | 0.0448    |
| Lh        | Brazil | RIP3_5 | 24h  | no_wasp    | Brazil  | RIP3_5 | 72h   | -0.53029   | 0.2609050 | -2.03   | 0.9823  | -1.5747   | 0.5141    |
| Lh        | Brazil | RIP3_5 | 24h  | no_wasp    | Uganda  | RIP1   | 24h   | 1.22647    | 0.2609050 | 4.70    | 0.0054* | 0.1820    | 2.2709    |
| Lh        | Brazil | RIP3_5 | 24h  | no_wasp    | Uganda  | RIP1   | 72h   | 0.74457    | 0.2609050 | 2.85    | 0.5949  | -0.2999   | 1.7890    |
| Lh        | Brazil | RIP3_5 | 24h  | no_wasp    | Uganda  | RIP2   | 24h   | -6.67168   | 0.2609050 | -25.57  | <.0001* | -7.7161   | -5.6272   |
| Lh        | Brazil | RIP3_5 | 24h  | no_wasp    | Uganda  | RIP2   | 72h   | -6.02166   | 0.2609050 | -23.08  | <.0001* | -7.0661   | -4.9772   |



## Generalized Regression for Value

## Standard Least Squares

## Multiple Comparisons for Treatment\*Strain\*RIP\*Time

## Tukey HSD All Pairwise Comparisons

## All Pairwise Differences

| Treatment | Strain | RIP    | Time | -Treatment | -Strain | -RIP   | -Time | Difference | Std Error | t Ratio | Prob> t | Lower 95% | Upper 95% |
|-----------|--------|--------|------|------------|---------|--------|-------|------------|-----------|---------|---------|-----------|-----------|
| Lh        | Brazil | RIP3_5 | 24h  | no_wasp    | Uganda  | RIP3_5 | 24h   | 1.23002    | 0.2609050 | 4.71    | 0.0052* | 0.1856    | 2.2744    |
| Lh        | Brazil | RIP3_5 | 24h  | no_wasp    | Uganda  | RIP3_5 | 72h   | -0.59788   | 0.2609050 | -2.29   | 0.9266  | -1.6423   | 0.4465    |
| Lh        | Brazil | RIP3_5 | 72h  | Lh         | Uganda  | RIP1   | 24h   | 2.60090    | 0.2609050 | 9.97    | <.0001* | 1.5565    | 3.6453    |
| Lh        | Brazil | RIP3_5 | 72h  | Lh         | Uganda  | RIP1   | 72h   | 2.32039    | 0.2609050 | 8.89    | <.0001* | 1.2760    | 3.3648    |
| Lh        | Brazil | RIP3_5 | 72h  | Lh         | Uganda  | RIP2   | 24h   | -5.91960   | 0.2609050 | -22.69  | <.0001* | -6.9640   | -4.8752   |
| Lh        | Brazil | RIP3_5 | 72h  | Lh         | Uganda  | RIP2   | 72h   | -6.31009   | 0.2609050 | -24.19  | <.0001* | -7.3545   | -5.2657   |
| Lh        | Brazil | RIP3_5 | 72h  | Lh         | Uganda  | RIP3_5 | 24h   | 2.33688    | 0.2609050 | 8.96    | <.0001* | 1.2924    | 3.3813    |
| Lh        | Brazil | RIP3_5 | 72h  | Lh         | Uganda  | RIP3_5 | 72h   | 1.13805    | 0.2609050 | 4.36    | 0.0167* | 0.0936    | 2.1825    |
| Lh        | Brazil | RIP3_5 | 72h  | no_wasp    | Brazil  | RIP1   | 24h   | 1.92433    | 0.2609050 | 7.38    | <.0001* | 0.8799    | 2.9688    |
| Lh        | Brazil | RIP3_5 | 72h  | no_wasp    | Brazil  | RIP1   | 72h   | 1.78858    | 0.2609050 | 6.86    | <.0001* | 0.7442    | 2.8330    |
| Lh        | Brazil | RIP3_5 | 72h  | no_wasp    | Brazil  | RIP2   | 24h   | -6.50629   | 0.2609050 | -24.94  | <.0001* | -7.5507   | -5.4619   |
| Lh        | Brazil | RIP3_5 | 72h  | no_wasp    | Brazil  | RIP2   | 72h   | -6.82909   | 0.2609050 | -26.17  | <.0001* | -7.8735   | -5.7847   |
| Lh        | Brazil | RIP3_5 | 72h  | no_wasp    | Brazil  | RIP3_5 | 24h   | -0.43319   | 0.2609050 | -1.66   | 0.9993  | -1.4776   | 0.6112    |
| Lh        | Brazil | RIP3_5 | 72h  | no_wasp    | Brazil  | RIP3_5 | 72h   | 0.03613    | 0.2609050 | 0.14    | 1.0000  | -1.0083   | 1.0806    |
| Lh        | Brazil | RIP3_5 | 72h  | no_wasp    | Uganda  | RIP1   | 24h   | 1.79289    | 0.2609050 | 6.87    | <.0001* | 0.7485    | 2.8373    |
| Lh        | Brazil | RIP3_5 | 72h  | no_wasp    | Uganda  | RIP1   | 72h   | 1.31099    | 0.2609050 | 5.02    | 0.0017* | 0.2666    | 2.3554    |
| Lh        | Brazil | RIP3_5 | 72h  | no_wasp    | Uganda  | RIP2   | 24h   | -6.10525   | 0.2609050 | -23.40  | <.0001* | -7.1497   | -5.0608   |
| Lh        | Brazil | RIP3_5 | 72h  | no_wasp    | Uganda  | RIP2   | 72h   | -5.45524   | 0.2609050 | -20.91  | <.0001* | -6.4997   | -4.4108   |
| Lh        | Brazil | RIP3_5 | 72h  | no_wasp    | Uganda  | RIP3_5 | 24h   | 1.79644    | 0.2609050 | 6.89    | <.0001* | 0.7520    | 2.8409    |
| Lh        | Brazil | RIP3_5 | 72h  | no_wasp    | Uganda  | RIP3_5 | 72h   | -0.03146   | 0.2609050 | -0.12   | 1.0000  | -1.0759   | 1.0130    |
| Lh        | Uganda | RIP1   | 24h  | Lh         | Uganda  | RIP1   | 72h   | -0.28052   | 0.2609050 | -1.08   | 1.0000  | -1.3249   | 0.7639    |
| Lh        | Uganda | RIP1   | 24h  | Lh         | Uganda  | RIP2   | 24h   | -8.52050   | 0.2609050 | -32.66  | <.0001* | -9.5649   | -7.4761   |
| Lh        | Uganda | RIP1   | 24h  | Lh         | Uganda  | RIP2   | 72h   | -8.91099   | 0.2609050 | -34.15  | <.0001* | -9.9554   | -7.8666   |
| Lh        | Uganda | RIP1   | 24h  | Lh         | Uganda  | RIP3_5 | 24h   | -0.26402   | 0.2609050 | -1.01   | 1.0000  | -1.3085   | 0.7804    |
| Lh        | Uganda | RIP1   | 24h  | Lh         | Uganda  | RIP3_5 | 72h   | -1.46285   | 0.2609050 | -5.61   | 0.0002* | -2.5073   | -0.4184   |
| Lh        | Uganda | RIP1   | 24h  | no_wasp    | Brazil  | RIP1   | 24h   | -0.67657   | 0.2609050 | -2.59   | 0.7795  | -1.7210   | 0.3679    |
| Lh        | Uganda | RIP1   | 24h  | no_wasp    | Brazil  | RIP1   | 72h   | -0.81232   | 0.2609050 | -3.11   | 0.4039  | -1.8568   | 0.2321    |
| Lh        | Uganda | RIP1   | 24h  | no_wasp    | Brazil  | RIP2   | 24h   | -9.10720   | 0.2609050 | -34.91  | <.0001* | -10.1516  | -8.0628   |
| Lh        | Uganda | RIP1   | 24h  | no_wasp    | Brazil  | RIP2   | 72h   | -9.42999   | 0.2609050 | -36.14  | <.0001* | -10.4744  | -8.3856   |
| Lh        | Uganda | RIP1   | 24h  | no_wasp    | Brazil  | RIP3_5 | 24h   | -3.03409   | 0.2609050 | -11.63  | <.0001* | -4.0785   | -1.9897   |
| Lh        | Uganda | RIP1   | 24h  | no_wasp    | Brazil  | RIP3_5 | 72h   | -2.56477   | 0.2609050 | -9.83   | <.0001* | -3.6092   | -1.5203   |

**Generalized Regression for Value****Standard Least Squares****Multiple Comparisons for Treatment\*Strain\*RIP\*Time****Tukey HSD All Pairwise Comparisons****All Pairwise Differences**

| Treatment | Strain | RIP  | Time | -Treatment | -Strain | -RIP   | -Time | Difference | Std Error | t Ratio | Prob> t | Lower 95% | Upper 95% |
|-----------|--------|------|------|------------|---------|--------|-------|------------|-----------|---------|---------|-----------|-----------|
| Lh        | Uganda | RIP1 | 24h  | no_wasp    | Uganda  | RIP1   | 24h   | -0.80801   | 0.2609050 | -3.10   | 0.4154  | -1.8524   | 0.2364    |
| Lh        | Uganda | RIP1 | 24h  | no_wasp    | Uganda  | RIP1   | 72h   | -1.28991   | 0.2609050 | -4.94   | 0.0023* | -2.3343   | -0.2455   |
| Lh        | Uganda | RIP1 | 24h  | no_wasp    | Uganda  | RIP2   | 24h   | -8.70616   | 0.2609050 | -33.37  | <.0001* | -9.7506   | -7.6617   |
| Lh        | Uganda | RIP1 | 24h  | no_wasp    | Uganda  | RIP2   | 72h   | -8.05614   | 0.2609050 | -30.88  | <.0001* | -9.1006   | -7.0117   |
| Lh        | Uganda | RIP1 | 24h  | no_wasp    | Uganda  | RIP3_5 | 24h   | -0.80446   | 0.2609050 | -3.08   | 0.4249  | -1.8489   | 0.2400    |
| Lh        | Uganda | RIP1 | 24h  | no_wasp    | Uganda  | RIP3_5 | 72h   | -2.63236   | 0.2609050 | -10.09  | <.0001* | -3.6768   | -1.5879   |
| Lh        | Uganda | RIP1 | 72h  | Lh         | Uganda  | RIP2   | 24h   | -8.23999   | 0.2609050 | -31.58  | <.0001* | -9.2844   | -7.1956   |
| Lh        | Uganda | RIP1 | 72h  | Lh         | Uganda  | RIP2   | 72h   | -8.63048   | 0.2609050 | -33.08  | <.0001* | -9.6749   | -7.5860   |
| Lh        | Uganda | RIP1 | 72h  | Lh         | Uganda  | RIP3_5 | 24h   | 0.01649    | 0.2609050 | 0.06    | 1.0000  | -1.0279   | 1.0609    |
| Lh        | Uganda | RIP1 | 72h  | Lh         | Uganda  | RIP3_5 | 72h   | -1.18234   | 0.2609050 | -4.53   | 0.0096* | -2.2268   | -0.1379   |
| Lh        | Uganda | RIP1 | 72h  | no_wasp    | Brazil  | RIP1   | 24h   | -0.39605   | 0.2609050 | -1.52   | 0.9999  | -1.4405   | 0.6484    |
| Lh        | Uganda | RIP1 | 72h  | no_wasp    | Brazil  | RIP1   | 72h   | -0.53180   | 0.2609050 | -2.04   | 0.9817  | -1.5762   | 0.5126    |
| Lh        | Uganda | RIP1 | 72h  | no_wasp    | Brazil  | RIP2   | 24h   | -8.82668   | 0.2609050 | -33.83  | <.0001* | -9.8711   | -7.7823   |
| Lh        | Uganda | RIP1 | 72h  | no_wasp    | Brazil  | RIP2   | 72h   | -9.14948   | 0.2609050 | -35.07  | <.0001* | -10.1939  | -8.1050   |
| Lh        | Uganda | RIP1 | 72h  | no_wasp    | Brazil  | RIP3_5 | 24h   | -2.75358   | 0.2609050 | -10.55  | <.0001* | -3.7980   | -1.7091   |
| Lh        | Uganda | RIP1 | 72h  | no_wasp    | Brazil  | RIP3_5 | 72h   | -2.28426   | 0.2609050 | -8.76   | <.0001* | -3.3287   | -1.2398   |
| Lh        | Uganda | RIP1 | 72h  | no_wasp    | Uganda  | RIP1   | 24h   | -0.52750   | 0.2609050 | -2.02   | 0.9836  | -1.5719   | 0.5169    |
| Lh        | Uganda | RIP1 | 72h  | no_wasp    | Uganda  | RIP1   | 72h   | -1.00940   | 0.2609050 | -3.87   | 0.0730  | -2.0538   | 0.0350    |
| Lh        | Uganda | RIP1 | 72h  | no_wasp    | Uganda  | RIP2   | 24h   | -8.42564   | 0.2609050 | -32.29  | <.0001* | -9.4701   | -7.3812   |
| Lh        | Uganda | RIP1 | 72h  | no_wasp    | Uganda  | RIP2   | 72h   | -7.77563   | 0.2609050 | -29.80  | <.0001* | -8.8201   | -6.7312   |
| Lh        | Uganda | RIP1 | 72h  | no_wasp    | Uganda  | RIP3_5 | 24h   | -0.52395   | 0.2609050 | -2.01   | 0.9850  | -1.5684   | 0.5205    |
| Lh        | Uganda | RIP1 | 72h  | no_wasp    | Uganda  | RIP3_5 | 72h   | -2.35185   | 0.2609050 | -9.01   | <.0001* | -3.3963   | -1.3074   |
| Lh        | Uganda | RIP2 | 24h  | Lh         | Uganda  | RIP2   | 72h   | -0.39049   | 0.2609050 | -1.50   | 0.9999  | -1.4349   | 0.6539    |
| Lh        | Uganda | RIP2 | 24h  | Lh         | Uganda  | RIP3_5 | 24h   | 8.25648    | 0.2609050 | 31.65   | <.0001* | 7.2120    | 9.3009    |
| Lh        | Uganda | RIP2 | 24h  | Lh         | Uganda  | RIP3_5 | 72h   | 7.05765    | 0.2609050 | 27.05   | <.0001* | 6.0132    | 8.1021    |
| Lh        | Uganda | RIP2 | 24h  | no_wasp    | Brazil  | RIP1   | 24h   | 7.84394    | 0.2609050 | 30.06   | <.0001* | 6.7995    | 8.8884    |
| Lh        | Uganda | RIP2 | 24h  | no_wasp    | Brazil  | RIP1   | 72h   | 7.70818    | 0.2609050 | 29.54   | <.0001* | 6.6638    | 8.7526    |
| Lh        | Uganda | RIP2 | 24h  | no_wasp    | Brazil  | RIP2   | 24h   | -0.58669   | 0.2609050 | -2.25   | 0.9400  | -1.6311   | 0.4577    |
| Lh        | Uganda | RIP2 | 24h  | no_wasp    | Brazil  | RIP2   | 72h   | -0.90949   | 0.2609050 | -3.49   | 0.1915  | -1.9539   | 0.1349    |
| Lh        | Uganda | RIP2 | 24h  | no_wasp    | Brazil  | RIP3_5 | 24h   | 5.48641    | 0.2609050 | 21.03   | <.0001* | 4.4420    | 6.5308    |
| Lh        | Uganda | RIP2 | 24h  | no_wasp    | Brazil  | RIP3_5 | 72h   | 5.95573    | 0.2609050 | 22.83   | <.0001* | 4.9113    | 7.0002    |

**Generalized Regression for Value**

**Standard Least Squares**

**Multiple Comparisons for Treatment\*Strain\*RIP\*Time**

**Tukey HSD All Pairwise Comparisons**

**All Pairwise Differences**

| Treatment | Strain | RIP    | Time | -Treatment | -Strain | -RIP   | -Time | Difference | Std Error | t Ratio | Prob> t | Lower 95% | Upper 95% |
|-----------|--------|--------|------|------------|---------|--------|-------|------------|-----------|---------|---------|-----------|-----------|
| Lh        | Uganda | RIP2   | 24h  | no_wasp    | Uganda  | RIP1   | 24h   | 7.71249    | 0.2609050 | 29.56   | <.0001* | 6.6681    | 8.7569    |
| Lh        | Uganda | RIP2   | 24h  | no_wasp    | Uganda  | RIP1   | 72h   | 7.23059    | 0.2609050 | 27.71   | <.0001* | 6.1862    | 8.2750    |
| Lh        | Uganda | RIP2   | 24h  | no_wasp    | Uganda  | RIP2   | 24h   | -0.18565   | 0.2609050 | -0.71   | 1.0000  | -1.2301   | 0.8588    |
| Lh        | Uganda | RIP2   | 24h  | no_wasp    | Uganda  | RIP2   | 72h   | 0.46436    | 0.2609050 | 1.78    | 0.9976  | -0.5801   | 1.5088    |
| Lh        | Uganda | RIP2   | 24h  | no_wasp    | Uganda  | RIP3_5 | 24h   | 7.71604    | 0.2609050 | 29.57   | <.0001* | 6.6716    | 8.7605    |
| Lh        | Uganda | RIP2   | 24h  | no_wasp    | Uganda  | RIP3_5 | 72h   | 5.88814    | 0.2609050 | 22.57   | <.0001* | 4.8437    | 6.9326    |
| Lh        | Uganda | RIP2   | 72h  | Lh         | Uganda  | RIP3_5 | 24h   | 8.64697    | 0.2609050 | 33.14   | <.0001* | 7.6025    | 9.6914    |
| Lh        | Uganda | RIP2   | 72h  | Lh         | Uganda  | RIP3_5 | 72h   | 7.44814    | 0.2609050 | 28.55   | <.0001* | 6.4037    | 8.4926    |
| Lh        | Uganda | RIP2   | 72h  | no_wasp    | Brazil  | RIP1   | 24h   | 8.23443    | 0.2609050 | 31.56   | <.0001* | 7.1900    | 9.2789    |
| Lh        | Uganda | RIP2   | 72h  | no_wasp    | Brazil  | RIP1   | 72h   | 8.09867    | 0.2609050 | 31.04   | <.0001* | 7.0542    | 9.1431    |
| Lh        | Uganda | RIP2   | 72h  | no_wasp    | Brazil  | RIP2   | 24h   | -0.19620   | 0.2609050 | -0.75   | 1.0000  | -1.2406   | 0.8482    |
| Lh        | Uganda | RIP2   | 72h  | no_wasp    | Brazil  | RIP2   | 72h   | -0.51900   | 0.2609050 | -1.99   | 0.9868  | -1.5634   | 0.5254    |
| Lh        | Uganda | RIP2   | 72h  | no_wasp    | Brazil  | RIP3_5 | 24h   | 5.87690    | 0.2609050 | 22.53   | <.0001* | 4.8325    | 6.9213    |
| Lh        | Uganda | RIP2   | 72h  | no_wasp    | Brazil  | RIP3_5 | 72h   | 6.34622    | 0.2609050 | 24.32   | <.0001* | 5.3018    | 7.3907    |
| Lh        | Uganda | RIP2   | 72h  | no_wasp    | Uganda  | RIP1   | 24h   | 8.10298    | 0.2609050 | 31.06   | <.0001* | 7.0586    | 9.1474    |
| Lh        | Uganda | RIP2   | 72h  | no_wasp    | Uganda  | RIP1   | 72h   | 7.62108    | 0.2609050 | 29.21   | <.0001* | 6.5766    | 8.6655    |
| Lh        | Uganda | RIP2   | 72h  | no_wasp    | Uganda  | RIP2   | 24h   | 0.20484    | 0.2609050 | 0.79    | 1.0000  | -0.8396   | 1.2493    |
| Lh        | Uganda | RIP2   | 72h  | no_wasp    | Uganda  | RIP2   | 72h   | 0.85485    | 0.2609050 | 3.28    | 0.2990  | -0.1896   | 1.8993    |
| Lh        | Uganda | RIP2   | 72h  | no_wasp    | Uganda  | RIP3_5 | 24h   | 8.10653    | 0.2609050 | 31.07   | <.0001* | 7.0621    | 9.1510    |
| Lh        | Uganda | RIP2   | 72h  | no_wasp    | Uganda  | RIP3_5 | 72h   | 6.27863    | 0.2609050 | 24.06   | <.0001* | 5.2342    | 7.3231    |
| Lh        | Uganda | RIP3_5 | 24h  | Lh         | Uganda  | RIP3_5 | 72h   | -1.19883   | 0.2609050 | -4.59   | 0.0078* | -2.2433   | -0.1544   |
| Lh        | Uganda | RIP3_5 | 24h  | no_wasp    | Brazil  | RIP1   | 24h   | -0.41255   | 0.2609050 | -1.58   | 0.9997  | -1.4570   | 0.6319    |
| Lh        | Uganda | RIP3_5 | 24h  | no_wasp    | Brazil  | RIP1   | 72h   | -0.54830   | 0.2609050 | -2.10   | 0.9728  | -1.5927   | 0.4961    |
| Lh        | Uganda | RIP3_5 | 24h  | no_wasp    | Brazil  | RIP2   | 24h   | -8.84317   | 0.2609050 | -33.89  | <.0001* | -9.8876   | -7.7987   |
| Lh        | Uganda | RIP3_5 | 24h  | no_wasp    | Brazil  | RIP2   | 72h   | -9.16597   | 0.2609050 | -35.13  | <.0001* | -10.2104  | -8.1215   |
| Lh        | Uganda | RIP3_5 | 24h  | no_wasp    | Brazil  | RIP3_5 | 24h   | -2.77007   | 0.2609050 | -10.62  | <.0001* | -3.8145   | -1.7256   |
| Lh        | Uganda | RIP3_5 | 24h  | no_wasp    | Brazil  | RIP3_5 | 72h   | -2.30075   | 0.2609050 | -8.82   | <.0001* | -3.3452   | -1.2563   |
| Lh        | Uganda | RIP3_5 | 24h  | no_wasp    | Uganda  | RIP1   | 24h   | -0.54399   | 0.2609050 | -2.09   | 0.9754  | -1.5884   | 0.5004    |
| Lh        | Uganda | RIP3_5 | 24h  | no_wasp    | Uganda  | RIP1   | 72h   | -1.02589   | 0.2609050 | -3.93   | 0.0612  | -2.0703   | 0.0185    |
| Lh        | Uganda | RIP3_5 | 24h  | no_wasp    | Uganda  | RIP2   | 24h   | -8.44213   | 0.2609050 | -32.36  | <.0001* | -9.4866   | -7.3977   |
| Lh        | Uganda | RIP3_5 | 24h  | no_wasp    | Uganda  | RIP2   | 72h   | -7.79212   | 0.2609050 | -29.87  | <.0001* | -8.8365   | -6.7477   |

**Generalized Regression for Value**

**Standard Least Squares**

**Multiple Comparisons for Treatment\*Strain\*RIP\*Time**

**Tukey HSD All Pairwise Comparisons**

**All Pairwise Differences**

| Treatment | Strain | RIP    | Time | -Treatment | -Strain | -RIP   | -Time | Difference | Std Error | t Ratio | Prob> t | Lower 95% | Upper 95% |
|-----------|--------|--------|------|------------|---------|--------|-------|------------|-----------|---------|---------|-----------|-----------|
| Lh        | Uganda | RIP3_5 | 24h  | no_wasp    | Uganda  | RIP3_5 | 24h   | -0.54044   | 0.2609050 | -2.07   | 0.9774  | -1.5849   | 0.5040    |
| Lh        | Uganda | RIP3_5 | 24h  | no_wasp    | Uganda  | RIP3_5 | 72h   | -2.36834   | 0.2609050 | -9.08   | <.0001* | -3.4128   | -1.3239   |
| Lh        | Uganda | RIP3_5 | 72h  | no_wasp    | Brazil  | RIP1   | 24h   | 0.78628    | 0.2609050 | 3.01    | 0.4752  | -0.2581   | 1.8307    |
| Lh        | Uganda | RIP3_5 | 72h  | no_wasp    | Brazil  | RIP1   | 72h   | 0.65053    | 0.2609050 | 2.49    | 0.8382  | -0.3939   | 1.6950    |
| Lh        | Uganda | RIP3_5 | 72h  | no_wasp    | Brazil  | RIP2   | 24h   | -7.64435   | 0.2609050 | -29.30  | <.0001* | -8.6888   | -6.5999   |
| Lh        | Uganda | RIP3_5 | 72h  | no_wasp    | Brazil  | RIP2   | 72h   | -7.96714   | 0.2609050 | -30.54  | <.0001* | -9.0116   | -6.9227   |
| Lh        | Uganda | RIP3_5 | 72h  | no_wasp    | Brazil  | RIP3_5 | 24h   | -1.57124   | 0.2609050 | -6.02   | <.0001* | -2.6157   | -0.5268   |
| Lh        | Uganda | RIP3_5 | 72h  | no_wasp    | Brazil  | RIP3_5 | 72h   | -1.10192   | 0.2609050 | -4.22   | 0.0259* | -2.1464   | -0.0575   |
| Lh        | Uganda | RIP3_5 | 72h  | no_wasp    | Uganda  | RIP1   | 24h   | 0.65484    | 0.2609050 | 2.51    | 0.8291  | -0.3896   | 1.6993    |
| Lh        | Uganda | RIP3_5 | 72h  | no_wasp    | Uganda  | RIP1   | 72h   | 0.17294    | 0.2609050 | 0.66    | 1.0000  | -0.8715   | 1.2174    |
| Lh        | Uganda | RIP3_5 | 72h  | no_wasp    | Uganda  | RIP2   | 24h   | -7.24331   | 0.2609050 | -27.76  | <.0001* | -8.2877   | -6.1989   |
| Lh        | Uganda | RIP3_5 | 72h  | no_wasp    | Uganda  | RIP2   | 72h   | -6.59329   | 0.2609050 | -25.27  | <.0001* | -7.6377   | -5.5489   |
| Lh        | Uganda | RIP3_5 | 72h  | no_wasp    | Uganda  | RIP3_5 | 24h   | 0.65839    | 0.2609050 | 2.52    | 0.8214  | -0.3860   | 1.7028    |
| Lh        | Uganda | RIP3_5 | 72h  | no_wasp    | Uganda  | RIP3_5 | 72h   | -1.16951   | 0.2609050 | -4.48   | 0.0113* | -2.2139   | -0.1251   |
| no_wasp   | Brazil | RIP1   | 24h  | no_wasp    | Brazil  | RIP1   | 72h   | -0.13575   | 0.2609050 | -0.52   | 1.0000  | -1.1802   | 0.9087    |
| no_wasp   | Brazil | RIP1   | 24h  | no_wasp    | Brazil  | RIP2   | 24h   | -8.43063   | 0.2609050 | -32.31  | <.0001* | -9.4751   | -7.3862   |
| no_wasp   | Brazil | RIP1   | 24h  | no_wasp    | Brazil  | RIP2   | 72h   | -8.75342   | 0.2609050 | -33.55  | <.0001* | -9.7979   | -7.7090   |
| no_wasp   | Brazil | RIP1   | 24h  | no_wasp    | Brazil  | RIP3_5 | 24h   | -2.35753   | 0.2609050 | -9.04   | <.0001* | -3.4020   | -1.3131   |
| no_wasp   | Brazil | RIP1   | 24h  | no_wasp    | Brazil  | RIP3_5 | 72h   | -1.88821   | 0.2609050 | -7.24   | <.0001* | -2.9326   | -0.8438   |
| no_wasp   | Brazil | RIP1   | 24h  | no_wasp    | Uganda  | RIP1   | 24h   | -0.13144   | 0.2609050 | -0.50   | 1.0000  | -1.1759   | 0.9130    |
| no_wasp   | Brazil | RIP1   | 24h  | no_wasp    | Uganda  | RIP1   | 72h   | -0.61335   | 0.2609050 | -2.35   | 0.9050  | -1.6578   | 0.4311    |
| no_wasp   | Brazil | RIP1   | 24h  | no_wasp    | Uganda  | RIP2   | 24h   | -8.02959   | 0.2609050 | -30.78  | <.0001* | -9.0740   | -6.9852   |
| no_wasp   | Brazil | RIP1   | 24h  | no_wasp    | Uganda  | RIP2   | 72h   | -7.37957   | 0.2609050 | -28.28  | <.0001* | -8.4240   | -6.3351   |
| no_wasp   | Brazil | RIP1   | 24h  | no_wasp    | Uganda  | RIP3_5 | 24h   | -0.12790   | 0.2609050 | -0.49   | 1.0000  | -1.1723   | 0.9165    |
| no_wasp   | Brazil | RIP1   | 24h  | no_wasp    | Uganda  | RIP3_5 | 72h   | -1.95580   | 0.2609050 | -7.50   | <.0001* | -3.0002   | -0.9114   |
| no_wasp   | Brazil | RIP1   | 72h  | no_wasp    | Brazil  | RIP2   | 24h   | -8.29488   | 0.2609050 | -31.79  | <.0001* | -9.3393   | -7.2504   |
| no_wasp   | Brazil | RIP1   | 72h  | no_wasp    | Brazil  | RIP2   | 72h   | -8.61767   | 0.2609050 | -33.03  | <.0001* | -9.6621   | -7.5732   |
| no_wasp   | Brazil | RIP1   | 72h  | no_wasp    | Brazil  | RIP3_5 | 24h   | -2.22177   | 0.2609050 | -8.52   | <.0001* | -3.2662   | -1.1773   |
| no_wasp   | Brazil | RIP1   | 72h  | no_wasp    | Brazil  | RIP3_5 | 72h   | -1.75245   | 0.2609050 | -6.72   | <.0001* | -2.7969   | -0.7080   |
| no_wasp   | Brazil | RIP1   | 72h  | no_wasp    | Uganda  | RIP1   | 24h   | 0.00431    | 0.2609050 | 0.02    | 1.0000  | -1.0401   | 1.0487    |
| no_wasp   | Brazil | RIP1   | 72h  | no_wasp    | Uganda  | RIP1   | 72h   | -0.47759   | 0.2609050 | -1.83   | 0.9962  | -1.5220   | 0.5668    |

## Generalized Regression for Value

### Standard Least Squares

### Multiple Comparisons for Treatment\*Strain\*RIP\*Time

### Tukey HSD All Pairwise Comparisons

#### All Pairwise Differences

| Treatment | Strain | RIP    | Time | -Treatment | -Strain | -RIP   | -Time | Difference | Std Error | t Ratio | Prob> t | Lower 95% | Upper 95% |
|-----------|--------|--------|------|------------|---------|--------|-------|------------|-----------|---------|---------|-----------|-----------|
| no_wasp   | Brazil | RIP1   | 72h  | no_wasp    | Uganda  | RIP2   | 24h   | -7.89384   | 0.2609050 | -30.26  | <.0001* | -8.9383   | -6.8494   |
| no_wasp   | Brazil | RIP1   | 72h  | no_wasp    | Uganda  | RIP2   | 72h   | -7.24382   | 0.2609050 | -27.76  | <.0001* | -8.2883   | -6.1994   |
| no_wasp   | Brazil | RIP1   | 72h  | no_wasp    | Uganda  | RIP3_5 | 24h   | 0.00786    | 0.2609050 | 0.03    | 1.0000  | -1.0366   | 1.0523    |
| no_wasp   | Brazil | RIP1   | 72h  | no_wasp    | Uganda  | RIP3_5 | 72h   | -1.82004   | 0.2609050 | -6.98   | <.0001* | -2.8645   | -0.7756   |
| no_wasp   | Brazil | RIP2   | 24h  | no_wasp    | Brazil  | RIP2   | 72h   | -0.32280   | 0.2609050 | -1.24   | 1.0000  | -1.3672   | 0.7216    |
| no_wasp   | Brazil | RIP2   | 24h  | no_wasp    | Brazil  | RIP3_5 | 24h   | 6.07310    | 0.2609050 | 23.28   | <.0001* | 5.0287    | 7.1175    |
| no_wasp   | Brazil | RIP2   | 24h  | no_wasp    | Brazil  | RIP3_5 | 72h   | 6.54242    | 0.2609050 | 25.08   | <.0001* | 5.4980    | 7.5869    |
| no_wasp   | Brazil | RIP2   | 24h  | no_wasp    | Uganda  | RIP1   | 24h   | 8.29919    | 0.2609050 | 31.81   | <.0001* | 7.2548    | 9.3436    |
| no_wasp   | Brazil | RIP2   | 24h  | no_wasp    | Uganda  | RIP1   | 72h   | 7.81728    | 0.2609050 | 29.96   | <.0001* | 6.7729    | 8.8617    |
| no_wasp   | Brazil | RIP2   | 24h  | no_wasp    | Uganda  | RIP2   | 24h   | 0.40104    | 0.2609050 | 1.54    | 0.9998  | -0.6434   | 1.4455    |
| no_wasp   | Brazil | RIP2   | 24h  | no_wasp    | Uganda  | RIP2   | 72h   | 1.05106    | 0.2609050 | 4.03    | 0.0464* | 0.0066    | 2.0955    |
| no_wasp   | Brazil | RIP2   | 24h  | no_wasp    | Uganda  | RIP3_5 | 24h   | 8.30273    | 0.2609050 | 31.82   | <.0001* | 7.2583    | 9.3472    |
| no_wasp   | Brazil | RIP2   | 24h  | no_wasp    | Uganda  | RIP3_5 | 72h   | 6.47483    | 0.2609050 | 24.82   | <.0001* | 5.4304    | 7.5193    |
| no_wasp   | Brazil | RIP2   | 72h  | no_wasp    | Brazil  | RIP3_5 | 24h   | 6.39590    | 0.2609050 | 24.51   | <.0001* | 5.3515    | 7.4403    |
| no_wasp   | Brazil | RIP2   | 72h  | no_wasp    | Brazil  | RIP3_5 | 72h   | 6.86522    | 0.2609050 | 26.31   | <.0001* | 5.8208    | 7.9096    |
| no_wasp   | Brazil | RIP2   | 72h  | no_wasp    | Uganda  | RIP1   | 24h   | 8.62198    | 0.2609050 | 33.05   | <.0001* | 7.5776    | 9.6664    |
| no_wasp   | Brazil | RIP2   | 72h  | no_wasp    | Uganda  | RIP1   | 72h   | 8.14008    | 0.2609050 | 31.20   | <.0001* | 7.0956    | 9.1845    |
| no_wasp   | Brazil | RIP2   | 72h  | no_wasp    | Uganda  | RIP2   | 24h   | 0.72384    | 0.2609050 | 2.77    | 0.6542  | -0.3206   | 1.7683    |
| no_wasp   | Brazil | RIP2   | 72h  | no_wasp    | Uganda  | RIP2   | 72h   | 1.37385    | 0.2609050 | 5.27    | 0.0007* | 0.3294    | 2.4183    |
| no_wasp   | Brazil | RIP2   | 72h  | no_wasp    | Uganda  | RIP3_5 | 24h   | 8.62553    | 0.2609050 | 33.06   | <.0001* | 7.5811    | 9.6700    |
| no_wasp   | Brazil | RIP2   | 72h  | no_wasp    | Uganda  | RIP3_5 | 72h   | 6.79763    | 0.2609050 | 26.05   | <.0001* | 5.7532    | 7.8421    |
| no_wasp   | Brazil | RIP3_5 | 24h  | no_wasp    | Brazil  | RIP3_5 | 72h   | 0.46932    | 0.2609050 | 1.80    | 0.9971  | -0.5751   | 1.5138    |
| no_wasp   | Brazil | RIP3_5 | 24h  | no_wasp    | Uganda  | RIP1   | 24h   | 2.22608    | 0.2609050 | 8.53    | <.0001* | 1.1817    | 3.2705    |
| no_wasp   | Brazil | RIP3_5 | 24h  | no_wasp    | Uganda  | RIP1   | 72h   | 1.74418    | 0.2609050 | 6.69    | <.0001* | 0.6997    | 2.7886    |
| no_wasp   | Brazil | RIP3_5 | 24h  | no_wasp    | Uganda  | RIP2   | 24h   | -5.67206   | 0.2609050 | -21.74  | <.0001* | -6.7165   | -4.6276   |
| no_wasp   | Brazil | RIP3_5 | 24h  | no_wasp    | Uganda  | RIP2   | 72h   | -5.02205   | 0.2609050 | -19.25  | <.0001* | -6.0665   | -3.9776   |
| no_wasp   | Brazil | RIP3_5 | 24h  | no_wasp    | Uganda  | RIP3_5 | 24h   | 2.22963    | 0.2609050 | 8.55    | <.0001* | 1.1852    | 3.2741    |
| no_wasp   | Brazil | RIP3_5 | 24h  | no_wasp    | Uganda  | RIP3_5 | 72h   | 0.40173    | 0.2609050 | 1.54    | 0.9998  | -0.6427   | 1.4462    |
| no_wasp   | Brazil | RIP3_5 | 72h  | no_wasp    | Uganda  | RIP1   | 24h   | 1.75676    | 0.2609050 | 6.73    | <.0001* | 0.7123    | 2.8012    |
| no_wasp   | Brazil | RIP3_5 | 72h  | no_wasp    | Uganda  | RIP1   | 72h   | 1.27486    | 0.2609050 | 4.89    | 0.0028* | 0.2304    | 2.3193    |
| no_wasp   | Brazil | RIP3_5 | 72h  | no_wasp    | Uganda  | RIP2   | 24h   | -6.14138   | 0.2609050 | -23.54  | <.0001* | -7.1858   | -5.0970   |

**Generalized Regression for Value**

**Standard Least Squares**

**Multiple Comparisons for Treatment\*Strain\*RIP\*Time**

**Tukey HSD All Pairwise Comparisons**

**All Pairwise Differences**

| Treatment | Strain | RIP    | Time | -Treatment | -Strain | -RIP   | -Time | Difference | Std Error | t Ratio | Prob> t | Lower 95% | Upper 95% |
|-----------|--------|--------|------|------------|---------|--------|-------|------------|-----------|---------|---------|-----------|-----------|
| no_wasp   | Brazil | RIP3_5 | 72h  | no_wasp    | Uganda  | RIP2   | 72h   | -5.49137   | 0.2609050 | -21.05  | <.0001* | -6.5358   | -4.4469   |
| no_wasp   | Brazil | RIP3_5 | 72h  | no_wasp    | Uganda  | RIP3_5 | 24h   | 1.76031    | 0.2609050 | 6.75    | <.0001* | 0.7159    | 2.8047    |
| no_wasp   | Brazil | RIP3_5 | 72h  | no_wasp    | Uganda  | RIP3_5 | 72h   | -0.06759   | 0.2609050 | -0.26   | 1.0000  | -1.1120   | 0.9768    |
| no_wasp   | Uganda | RIP1   | 24h  | no_wasp    | Uganda  | RIP1   | 72h   | -0.48190   | 0.2609050 | -1.85   | 0.9956  | -1.5263   | 0.5625    |
| no_wasp   | Uganda | RIP1   | 24h  | no_wasp    | Uganda  | RIP2   | 24h   | -7.89815   | 0.2609050 | -30.27  | <.0001* | -8.9426   | -6.8537   |
| no_wasp   | Uganda | RIP1   | 24h  | no_wasp    | Uganda  | RIP2   | 72h   | -7.24813   | 0.2609050 | -27.78  | <.0001* | -8.2926   | -6.2037   |
| no_wasp   | Uganda | RIP1   | 24h  | no_wasp    | Uganda  | RIP3_5 | 24h   | 0.00355    | 0.2609050 | 0.01    | 1.0000  | -1.0409   | 1.0480    |
| no_wasp   | Uganda | RIP1   | 24h  | no_wasp    | Uganda  | RIP3_5 | 72h   | -1.82435   | 0.2609050 | -6.99   | <.0001* | -2.8688   | -0.7799   |
| no_wasp   | Uganda | RIP1   | 72h  | no_wasp    | Uganda  | RIP2   | 24h   | -7.41624   | 0.2609050 | -28.43  | <.0001* | -8.4607   | -6.3718   |
| no_wasp   | Uganda | RIP1   | 72h  | no_wasp    | Uganda  | RIP2   | 72h   | -6.76623   | 0.2609050 | -25.93  | <.0001* | -7.8107   | -5.7218   |
| no_wasp   | Uganda | RIP1   | 72h  | no_wasp    | Uganda  | RIP3_5 | 24h   | 0.48545    | 0.2609050 | 1.86    | 0.9951  | -0.5590   | 1.5299    |
| no_wasp   | Uganda | RIP1   | 72h  | no_wasp    | Uganda  | RIP3_5 | 72h   | -1.34245   | 0.2609050 | -5.15   | 0.0011* | -2.3869   | -0.2980   |
| no_wasp   | Uganda | RIP2   | 24h  | no_wasp    | Uganda  | RIP2   | 72h   | 0.65002    | 0.2609050 | 2.49    | 0.8392  | -0.3944   | 1.6944    |
| no_wasp   | Uganda | RIP2   | 24h  | no_wasp    | Uganda  | RIP3_5 | 24h   | 7.90169    | 0.2609050 | 30.29   | <.0001* | 6.8573    | 8.9461    |
| no_wasp   | Uganda | RIP2   | 24h  | no_wasp    | Uganda  | RIP3_5 | 72h   | 6.07379    | 0.2609050 | 23.28   | <.0001* | 5.0294    | 7.1182    |
| no_wasp   | Uganda | RIP2   | 72h  | no_wasp    | Uganda  | RIP3_5 | 24h   | 7.25168    | 0.2609050 | 27.79   | <.0001* | 6.2072    | 8.2961    |
| no_wasp   | Uganda | RIP2   | 72h  | no_wasp    | Uganda  | RIP3_5 | 72h   | 5.42378    | 0.2609050 | 20.79   | <.0001* | 4.3793    | 6.4682    |
| no_wasp   | Uganda | RIP3_5 | 24h  | no_wasp    | Uganda  | RIP3_5 | 72h   | -1.82790   | 0.2609050 | -7.01   | <.0001* | -2.8723   | -0.7835   |

**All Pairwise Differences Connecting Letters**



**Generalized Regression for Value**

**Standard Least Squares**

**Multiple Comparisons for Treatment\*Strain\*RIP\*Time**

**Tukey HSD All Pairwise Comparisons**

**All Pairwise Differences Connecting Letters**

| Treatment | Strain | RIP    | Time |  |  |  |  |  |  |  |  |  |  |  | Least Squares Mean |
|-----------|--------|--------|------|--|--|--|--|--|--|--|--|--|--|--|--------------------|
| Gh        | Uganda | RIP1   | 72h  |  |  |  |  |  |  |  |  |  |  |  | -3.133749          |
| Lh        | Uganda | RIP1   | 24h  |  |  |  |  |  |  |  |  |  |  |  | -3.138850          |
| Gh        | Uganda | RIP3_5 | 24h  |  |  |  |  |  |  |  |  |  |  |  | -3.434118          |
| Gh        | Uganda | RIP1   | 24h  |  |  |  |  |  |  |  |  |  |  |  | -3.438974          |
| Gh        | Brazil | RIP1   | 24h  |  |  |  |  |  |  |  |  |  |  |  | -3.443138          |
| Lh        | Brazil | RIP1   | 24h  |  |  |  |  |  |  |  |  |  |  |  | -3.508949          |

Levels not connected by same letter are significantly different.

**All Pairwise Comparisons Scatterplot**

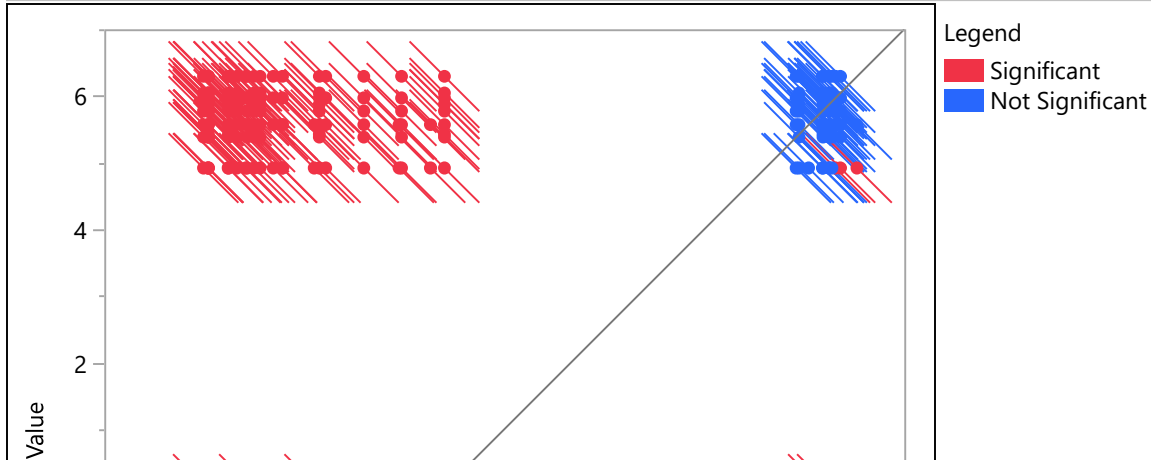



**Generalized Regression for Value**

**Standard Least Squares**

**Multiple Comparisons for Treatment\*Strain\*RIP\*Time**

**Tukey HSD All Pairwise Comparisons**

**All Pairwise Comparisons Scatterplot**

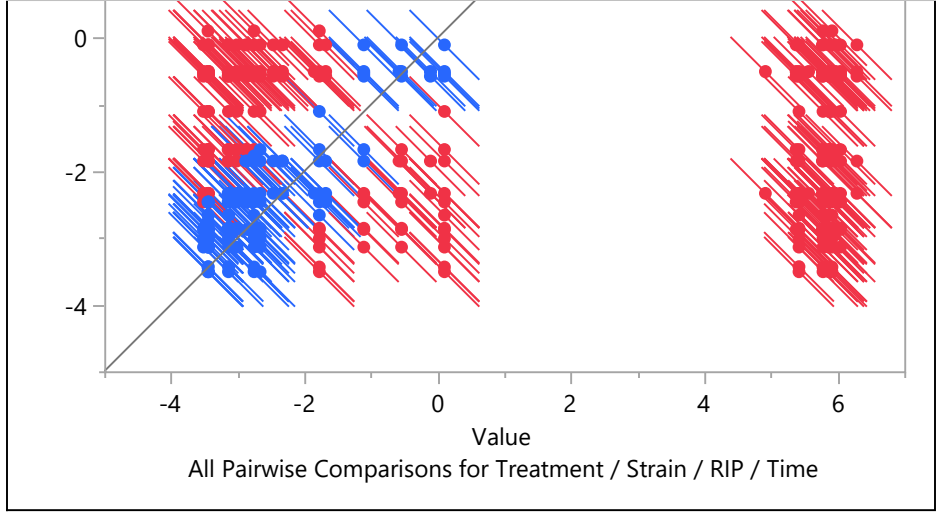

Supplement: Suplementary_fileS1.pdf [file Suplementary_fileS1.pdf]
