# Supplementary material for: Differential gene expression in a tripartite interaction: Drosophila, Spiroplasma and parasitic wasps
Source: PeerJ. 2021 Mar 4;9:e11020. doi: 10.7717/peerj.11020 (PMC7937342; doi:10.7717/peerj.11020)
Supplement: Supplemental Information 2 — Delta Ct values for the five Spiroplasma encoded RIP genes. The MRSO-BR and MRSO-UG Spiroplasma strains were evaluated in the absence of wasps or in the presence of one of two wasps (L. heterotoma or Ganaspis sp.) at two time points post-wasp attack (24 and 72 h). [file peerj-09-11020-s002.xlsx]

## Sheet: delta Ct RIP Uganda treatments
Dataset S2. Delta Ct values for the five RIP genes present in S. poulsonii, MRSO-UG strain.
Treatment	Strain	rpoB Ct	rpoB Ct_Corrected	RIP2 Ct	RIP2_Corrected	delta CT_RIP2	RIP1Ct	Ct_RIP1_corrected	delta CT_RIP1	RIP3-5Ct	Ct_RIP3-5_corrected*	delta Ct_RIP3-5
No wasp_24hrs	Uganda	26.13	26.0923	22.04	20.7585	5.33374	28.49	28.3871	-2.29483	27.44	28.2239	-2.13165
No wasp_24hrs	Uganda	26.89	26.8512	22.45	21.1447	5.70649	29.19	29.0846	-2.2334	28.52	29.3348	-2.48361
No wasp_24hrs	Uganda	26.1	26.0623	21.66	20.4006	5.66169	28.63	28.5266	-2.46428	27.66	28.4502	-2.3879
No wasp_72hrs	Uganda	25.24	25.2036	21.94	20.6644	4.53921	27.11	27.0121	-1.80853	24.78	25.4879	-0.284375
No wasp_72hrs	Uganda	25.11	25.0738	21.22	19.9862	5.08754	27.05	26.9523	-1.87856	24.98	25.6937	-0.619902
No wasp_72hrs	Uganda	24.61	24.5745	20.65	19.4494	5.12512	26.53	26.4342	-1.85972	24.49	25.1897	-0.615181
L. heterotoma_infected_24hrs	Uganda	27.51	27.4703	23.37	22.0112	5.45908	30.38	30.2703	-2.8	29.14	29.9725	-2.50221
L. heterotoma_infected_24hrs	Uganda	27.24	27.2007	23.05	21.7098	5.49087	30.52	30.4098	-3.2091	29.54	30.3839	-3.18325
L. heterotoma_infected_24hrs	Uganda	27.67	27.6301	23.82	22.435	5.19501	31.15	31.0375	-3.40745	29.72	30.5691	-2.93901
L. heterotoma_infected_24hrs	Uganda	25.48	25.4432	20.57	19.374	6.06921	27.91	27.8092	-2.36599	25.77	26.5062	-1.06301
L. heterotoma_infected_24hrs	Uganda	25.27	25.2335	20.53	19.3363	5.89719	28.69	28.5864	-3.35287	26.74	27.5039	-2.27041
L. heterotoma_infected_24hrs	Uganda	24.59	24.5545	20.39	19.2045	5.35003	27.51	27.4107	-2.85615	25.52	26.2491	-1.69458
Ganaspis sp._infected_24hrs	Uganda	27.58	27.5402	23.43	22.0677	5.47247	30.81	30.6987	-3.15855	30.18	31.0422	-3.50203
Ganaspis sp._infected_24hrs	Uganda	26.84	26.8013	22.64	21.3237	5.4776	30.43	30.3201	-3.51885	29.13	29.9622	-3.16096
Ganaspis sp._infected_24hrs	Uganda	26.33	26.292	22.27	20.9752	5.31683	30.04	29.9315	-3.63952	29.1	29.9314	-3.63937
Ganaspis sp._infected_24hrs	Uganda	25.89	25.8526	20.98	19.7602	6.09246	28.66	28.5565	-2.70387	27.75	28.5428	-2.69016
Ganaspis sp._infected_24hrs	Uganda	24.91	24.874	20.21	19.0349	5.8391	28.12	28.0185	-3.14441	26.4	27.1542	-2.28018
Ganaspis sp._infected_24hrs	Uganda	24.89	24.8541	20.35	19.1668	5.68727	28.51	28.407	-3.55297	27.09	27.8639	-3.00986
* Correction was done using formula described in methods
Values in bold were used to contruct the graph present in main text

## Sheet: delta Ct RIP Brazil Treatments
Dataset S2. Delta Ct values for the five RIP genes present in S. poulsonii, MRSO-BR strain.
Treatment	Strain	rpoB Ct	rpoB Ct_Corrected	RIP2 Ct	RIP2_Corrected	delta CT_RIP2	RIP1Ct	Ct_RIP1_corrected	delta CT_RIP1	RIP3-5Ct	Ct_RIP3-5_corrected*	delta Ct_RIP3-5
No wasp_24hrs	Brazil	27.29	27.2506	22.59	21.2766	5.97405	30.1	29.9913	-2.74069	26.99	27.7611	-0.510472
No wasp_24hrs	Brazil	26.89	26.8512	22.22	20.9281	5.92311	29.41	29.3038	-2.45261	25.99	26.7325	0.118674
No wasp_24hrs	Brazil	26.89	26.8512	22.13	20.8433	6.00788	29.15	29.0447	-2.19355	26.03	26.7737	0.0775315
No wasp_72hrs	Brazil	24.93	24.894	20.16	18.9878	5.90617	27.25	27.1516	-2.25758	24.7	25.4057	-0.511642
No wasp_72hrs	Brazil	25.37	25.3334	20.3	19.1197	6.21367	28.05	27.9487	-2.61532	24.86	25.5702	-0.236849
No wasp_72hrs	Brazil	25.59	25.5531	19.96	18.7995	6.75359	27.76	27.6598	-2.10669	25.79	26.5268	-0.973735
L. heterotoma_infected_24hrs	Brazil	27.93	27.8897	23.31	21.9547	5.93499	31.48	31.3663	-3.47663	27.85	28.6457	-0.755966
L. heterotoma_infected_24hrs	Brazil	28.78	28.7385	24.38	22.9625	5.77597	32.6	32.4823	-3.74381	29.05	29.8799	-1.14148
L. heterotoma_infected_24hrs	Brazil	28.32	28.2791	23.74	22.3597	5.91942	31.7	31.5855	-3.3064	28.87	29.6948	-1.41567
L. heterotoma_infected_72hrs	Brazil	26.71	26.6714	22.52	21.2106	5.46082	30.08	29.9714	-3.29993	26.66	27.4217	-0.750207
L. heterotoma_infected_72hrs	Brazil	25.6	25.563	20.55	19.3552	6.20788	28.48	28.3772	-2.8141	25	25.7142	-0.15118
L. heterotoma_infected_72hrs	Brazil	30.25	30.2063	25.21	23.7442	6.46211	33.24	33.12	-2.91363	30.06	30.9188	-0.712452
Ganaspis sp._infected_24hrs	Brazil	28.32	28.2791	24.04	22.6423	5.63687	31.69	31.5756	-3.29644	29.5	30.3428	-2.06367
Ganaspis sp._infected_24hrs	Brazil	27.64	27.6001	23.17	21.8228	5.77727	31.53	31.4161	-3.81603	28.56	29.3759	-1.77583
Ganaspis sp._infected_24hrs	Brazil	28.22	28.1793	23.62	22.2467	5.93259	31.51	31.3962	-3.21694	28.83	29.6536	-1.47438
Ganaspis sp._infected_72hrs	Brazil	26.06	26.0224	21.3	20.0616	5.96082	29.38	29.2739	-3.25152	25.66	26.3931	-0.3707
Ganaspis sp._infected_72hrs	Brazil	24.71	24.6743	20.03	18.8654	5.80893	27.49	27.3907	-2.71639	24.01	24.6959	-0.0216122
Ganaspis sp._infected_72hrs	Brazil	24.95	24.914	20.1	18.9313	5.98265	27.3	27.2014	-2.28743	23.54	24.2125	0.701469
* Correction was done using formula described in methods
Values in bold were used to contruct the graph present in main text

## Sheet: Summarized results for ggplot 
Dataset S2. Summarized delta Ct values for the five S. poulsonii RIP genes present in the MRSO-BR and MRS-BR strains.
Treatment	Value	Strain	RIP	Time
S+W–	-2.29483	Uganda	RIP1	24h
S+W–	-2.2334	Uganda	RIP1	24h
S+W–	-2.46428	Uganda	RIP1	24h
S+W–	-1.80853	Uganda	RIP1	72h
S+W–	-1.87856	Uganda	RIP1	72h
S+W–	-1.85972	Uganda	RIP1	72h
S+Lh	-2.8	Uganda	RIP1	24h
S+Lh	-3.2091	Uganda	RIP1	24h
S+Lh	-3.40745	Uganda	RIP1	24h
S+Lh	-2.36599	Uganda	RIP1	72h
S+Lh	-3.35287	Uganda	RIP1	72h
S+Lh	-2.85615	Uganda	RIP1	72h
S+Gh	-3.15855	Uganda	RIP1	24h
S+Gh	-3.51885	Uganda	RIP1	24h
S+Gh	-3.63952	Uganda	RIP1	24h
S+Gh	-2.70387	Uganda	RIP1	72h
S+Gh	-3.14441	Uganda	RIP1	72h
S+Gh	-3.55297	Uganda	RIP1	72h
S+W–	-2.74069	Brazil	RIP1	24h
S+W–	-2.45261	Brazil	RIP1	24h
S+W–	-2.19355	Brazil	RIP1	24h
S+W–	-2.25758	Brazil	RIP1	72h
S+W–	-2.61532	Brazil	RIP1	72h
S+W–	-2.10669	Brazil	RIP1	72h
S+Lh	-3.47663	Brazil	RIP1	24h
S+Lh	-3.74381	Brazil	RIP1	24h
S+Lh	-3.3064	Brazil	RIP1	24h
S+Lh	-3.29993	Brazil	RIP1	72h
S+Lh	-2.8141	Brazil	RIP1	72h
S+Lh	-2.91363	Brazil	RIP1	72h
S+Gh	-3.29644	Brazil	RIP1	24h
S+Gh	-3.81603	Brazil	RIP1	24h
S+Gh	-3.21694	Brazil	RIP1	24h
S+Gh	-3.25152	Brazil	RIP1	72h
S+Gh	-2.71639	Brazil	RIP1	72h
S+Gh	-2.28743	Brazil	RIP1	72h
S+W–	5.33374	Uganda	RIP2	24h
S+W–	5.70649	Uganda	RIP2	24h
S+W–	5.66169	Uganda	RIP2	24h
S+W–	4.53921	Uganda	RIP2	72h
S+W–	5.08754	Uganda	RIP2	72h
S+W–	5.12512	Uganda	RIP2	72h
S+Lh	5.45908	Uganda	RIP2	24h
S+Lh	5.49087	Uganda	RIP2	24h
S+Lh	5.19501	Uganda	RIP2	24h
S+Lh	6.06921	Uganda	RIP2	72h
S+Lh	5.89719	Uganda	RIP2	72h
S+Lh	5.35003	Uganda	RIP2	72h
S+Gh	5.47247	Uganda	RIP2	24h
S+Gh	5.4776	Uganda	RIP2	24h
S+Gh	5.31683	Uganda	RIP2	24h
S+Gh	6.09246	Uganda	RIP2	72h
S+Gh	5.8391	Uganda	RIP2	72h
S+Gh	5.68727	Uganda	RIP2	72h
S+W–	5.97405	Brazil	RIP2	24h
S+W–	5.92311	Brazil	RIP2	24h
S+W–	6.00788	Brazil	RIP2	24h
S+W–	5.90617	Brazil	RIP2	72h
S+W–	6.21367	Brazil	RIP2	72h
S+W–	6.75359	Brazil	RIP2	72h
S+Lh	5.93499	Brazil	RIP2	24h
S+Lh	5.77597	Brazil	RIP2	24h
S+Lh	5.91942	Brazil	RIP2	24h
S+Lh	5.46082	Brazil	RIP2	72h
S+Lh	6.20788	Brazil	RIP2	72h
S+Lh	6.46211	Brazil	RIP2	72h
S+Gh	5.63687	Brazil	RIP2	24h
S+Gh	5.77727	Brazil	RIP2	24h
S+Gh	5.93259	Brazil	RIP2	24h
S+Gh	5.96082	Brazil	RIP2	72h
S+Gh	5.80893	Brazil	RIP2	72h
S+Gh	5.98265	Brazil	RIP2	72h
S+W–	-2.13165	Uganda	RIP3_5	24h
S+W–	-2.48361	Uganda	RIP3_5	24h
S+W–	-2.3879	Uganda	RIP3_5	24h
S+W–	-0.284375	Uganda	RIP3_5	72h
S+W–	-0.619902	Uganda	RIP3_5	72h
S+W–	-0.615181	Uganda	RIP3_5	72h
S+Lh	-2.50221	Uganda	RIP3_5	24h
S+Lh	-3.18325	Uganda	RIP3_5	24h
S+Lh	-2.93901	Uganda	RIP3_5	24h
S+Lh	-1.06301	Uganda	RIP3_5	72h
S+Lh	-2.27041	Uganda	RIP3_5	72h
S+Lh	-1.69458	Uganda	RIP3_5	72h
S+Gh	-3.50203	Uganda	RIP3_5	24h
S+Gh	-3.16096	Uganda	RIP3_5	24h
S+Gh	-3.63937	Uganda	RIP3_5	24h
S+Gh	-2.69016	Uganda	RIP3_5	72h
S+Gh	-2.28018	Uganda	RIP3_5	72h
S+Gh	-3.00986	Uganda	RIP3_5	72h
S+W–	-0.510472	Brazil	RIP3_5	24h
S+W–	0.118674	Brazil	RIP3_5	24h
S+W–	0.0775315	Brazil	RIP3_5	24h
S+W–	-0.511642	Brazil	RIP3_5	72h
S+W–	-0.236849	Brazil	RIP3_5	72h
S+W–	-0.973735	Brazil	RIP3_5	72h
S+Lh	-0.755966	Brazil	RIP3_5	24h
S+Lh	-1.14148	Brazil	RIP3_5	24h
S+Lh	-1.41567	Brazil	RIP3_5	24h
S+Lh	-0.750207	Brazil	RIP3_5	72h
S+Lh	-0.15118	Brazil	RIP3_5	72h
S+Lh	-0.712452	Brazil	RIP3_5	72h
S+Gh	-2.06367	Brazil	RIP3_5	24h
S+Gh	-1.77583	Brazil	RIP3_5	24h
S+Gh	-1.47438	Brazil	RIP3_5	24h
S+Gh	-0.3707	Brazil	RIP3_5	72h
S+Gh	-0.0216122	Brazil	RIP3_5	72h
S+Gh	0.701469	Brazil	RIP3_5	72h
