# Supplementary material for: Differential gene expression in a tripartite interaction: Drosophila, Spiroplasma and parasitic wasps
Source: PeerJ. 2021 Mar 4;9:e11020. doi: 10.7717/peerj.11020 (PMC7937342; doi:10.7717/peerj.11020)
Supplement: Supplemental Information 4 — List of genes differentially expressed (DE) among different treatment pairwise comparisons. GO enriched categories. Fold-change comparisons in different treatments and comparison of our results with a previous publication. All data correspond to time point 1. [file peerj-09-11020-s004.xlsx]

## Sheet: Organization of datasets
Content description of Dataset S4
Inside of this dataset you will find:
1. List of genes differentially expresed (DE) among different comparisons at time point 1 (24 hours post wasp attack). Filtering was done at FDR < 0.05. The cpm for each gene in different replicates is reported. The name of the comparison is specified in the different sheet labels. For example, in sheet "DE: S–W– vs. S+W–", we report the DE genes for that comparison.
2. List of Gene Ontology (GO) enrichments for the DE genes in each comparison, includes pathway and protein domain enrichments. For example, in sheet "GO: S–W– vs. S+W–", we report enrichments of the DE genes from S–W– vs. S+W– comparison. If there is no sheet for a particular comparison, it means that there was no GO enrichment for these genes.
3. Sheet labeled "FC: Comparisons": Log2 fold changes values corresponding to DE genes that are shared between at least two different comparisons at time point 1 (24 hours post wasp attack).
4. Sheet labeled "Schlenke: FC": Fold-change and cpm values for the 37 genes reported by Schlenke et al. (2007) with differential expression in a treatment with wasp L. heterotoma (Lh14) at ~24 h post-wasp attack
Abbreviations	Meaning
S–	No Spiroplasma
W–	No Wasp parasitism
S+	Spiroplasma infection
Lh	L. heterotoma parasitism
Gh	Ganaspis sp. parasitism
S–W–	No Spiroplasma-No wasp
S+W–	Spiroplasma-No wasp
S–Lh	No Spiroplasma-L. heterotoma
S–Gh	No Spiroplasma-Ganaspis sp.
S+Lh	Spiroplasma-L. heterotoma
S+Gh	Spiroplasma-Ganaspis sp.
Comparison	Number of genes after filtering (CPM > 1)
S–W– vs. S+W–	9991
S–W– vs. S–Lh	10098
S–W– vs. S–Gh	10171
S–Lh vs. S+Lh	10084
S–Gh vs. S+Gh	10111
Total number of genes in our D. melanogaster reference: 17560

## Sheet: DE S–W– vs. S+W– 
Diferentially upregulated genes in S–W– vs. S+W– comparison. Time 1, 24 hours post wasp attack, log2 FC is reported in tables.
Gene_id	log2FC	logCPM	F	PValue	FDR	Secondary_identifier	Gene_symbol	Gene_name
N/A	N/A	N/A	N/A	N/A	N/A	N/A	N/A	N/A
*No diferentially upregulated genes in S–W– vs. S+W– comparision. Time 1
Diferentially downregulated genes in S–W– vs. S+W– comparison. Time 1, 24 hours post wasp attack, log2 FC is reported in tables.
Gene_id	log2FC	logCPM	F	PValue	FDR	Secondary_identifier	Gene_symbol	Gene_name	cpm (S–W–_1)	cpm (S–W–_2)	cpm (S–W–_3)	cpm (S–W–_4)	cpm (S+W–_1)	cpm (S+W–_2)	cpm (S+W–_3)	cpm (S+W–_4)	Tissue enrichment
FBgn0034837	-6.20005	1.96695	556.755	1.05294e-08	0.000105199	CG9871	RpL22-like	Ribosomal protein L22-like	7.28081	7.9581	8.01292	7.49059	0.115933	0.119279	0.0358644	0.125639	Testis
FBgn0030647	-7.01974	0.728549	355.608	6.18715e-08	0.000309079	CG6324	CG6324		3.60573	3.3211	2.93431	2.92949	0.0289832	0	0.0358644	0	Testis
FBgn0030667	-5.93767	0.526767	231.695	3.31161e-07	0.000997363	CG15599	CG15599		2.35759	2.88246	3.23526	2.44742	0.0289832	0	0.0358644	0.0837596	Testis
FBgn0019661	-1.95659	8.53024	201.64	5.68163e-07	0.000997363	CR32777	lncRNA:roX1	long non-coding RNA on the X	662.831	612.21	667.517	454.293	163.233	154.526	133.523	143.271
FBgn0262104	-4.92996	0.0946216	201.289	5.72005e-07	0.000997363	CG42857	CG42857		1.80287	1.37857	2.29478	2.22493	0.0869496	0.0596397	0.0358644	0.0418798	Testis
FBgn0031296	-4.44281	1.43884	198.912	5.98957e-07	0.000997363	CG4415	CG4415		4.92321	5.01297	5.71814	4.78359	0.202883	0.298198	0.32278	0.0837596	Testis
FBgn0036809	-6.95197	0.686324	167.341	1.16758e-06	0.00166647	CG12477	CG12477		2.46161	2.3185	3.64907	3.78238	0.0289832	0.0596397	0	0	Testis
FBgn0005616	-1.12615	3.36473	150.494	1.75498e-06	0.00207752	CG3241	msl-2	male-specific lethal 2	14.8736	14.7883	14.7092	12.7563	7.44869	5.84469	5.81004	6.19821
FBgn0038191	-2.95116	0.454992	147.99	1.87146e-06	0.00207752	CG9925	CG9925		2.42694	2.19318	2.3324	2.37326	0.376782	0.119279	0.32278	0.293159
FBgn0019660	-7.35336	5.6186	167.093	2.1578e-06	0.00215586	CR32665	lncRNA:roX2	long non-coding RNA on the X	85.5321	71.1842	143.856	93.9661	1.13035	0.357838	0.609695	0.167519
FBgn0034998	-5.6446	-0.0819039	106.14	6.60952e-06	0.00600325	CG13577	CG13577		1.5255	1.31591	1.80573	2.18785	0.0579664	0.0596397	0	0	Testis
FBgn0028852	-5.74131	-0.413961	101.592	7.79095e-06	0.00648662	CG15262	CG15262		1.21347	1.06526	1.73049	1.29787	0	0.0596397	0.0358644	0	Testis
FBgn0000146	-2.14018	1.29452	94.4657	1.02269e-05	0.00785975	CG6137	aub	aubergine	3.32837	3.63441	5.00337	3.74529	1.15933	0.596397	0.789018	0.879476
FBgn0052971	-5.16287	-0.146399	92.4471	1.10846e-05	0.00791042	CG32971	CG32971		1.5255	1.12792	1.61763	2.15076	0	0.0596397	0.0358644	0.0837596	Testis
FBgn0036224	-5.98268	-0.198623	90.3164	1.20897e-05	0.00805253	CG7257	Rpt4R	Regulatory particle triple-A ATPase 4-related	1.14413	1.19058	2.25716	1.6687	0	0.0596397	0.0358644	0	Testis
FBgn0032089	-2.36889	0.43237	78.737	2.00856e-05	0.0125422	CG9573	Rcd-1r	Rcd-1 related	1.69885	2.06785	2.48288	2.37326	0.318815	0.357838	0.358644	0.586317	Testis
FBgn0038277	-2.32775	1.32591	77.1639	2.16328e-05	0.0127137	CG7014	RpS5b	Ribosomal protein S5b	4.40315	2.94512	4.74003	4.30153	1.0434	0.536757	1.0042	0.544437
FBgn0039129	-2.79437	0.577215	75.6811	2.32297e-05	0.0128938	CG5338	RpS19b	Ribosomal protein S19b	2.21891	1.75454	3.16002	2.81824	0.492715	0.238559	0.215187	0.418798	Testis
FBgn0010258	-2.90875	0.282157	73.9902	2.52348e-05	0.0132695	CG9654	Rbp4	RNA-binding protein 4	1.42149	1.75454	2.70859	2.22493	0.202883	0.178919	0.394509	0.251279	Testis
FBgn0035571	-4.25459	0.24803	72.7343	2.68654e-05	0.0134206	CG12493	CG12493		1.73353	1.06526	2.59573	3.00365	0.173899	0.119279	0.0717289	0.0418798	Testis
FBgn0013813	-2.6116	0.000693488	69.5266	3.16694e-05	0.0147192	CG1842	Dhc98D	Dynein heavy chain at 89D	1.62951	1.8172	1.58001	1.48328	0.289832	0.0596397	0.286915	0.335038	Testis
FBgn0025111	-1.18646	2.00219	69.0855	3.24114e-05	0.0147192	CG1683	Ant2	Adenine nucleotide translocase 2	4.78453	5.20096	6.13195	6.0073	2.31866	2.38559	2.36705	2.34527	Testis
FBgn0013672	-2.32058	9.9837	67.7498	3.94405e-05	0.0171326	CG34073	mt:ATPase6	mitochondrial ATPase subunit 6	2368.62	1216.71	1753.36	1538.65	258.154	273.09	299.145	494.182
FBgn0035608	-4.30991	1.82887	62.2943	4.9779e-05	0.0207226	CG10630	blanks	blanks	4.95788	3.50908	9.40483	8.52889	0.144916	0.656036	0.32278	0.251279	Testis
FBgn0029754	-2.86112	-0.0233158	56.1024	6.85818e-05	0.027408	CG15930	CG15930		1.31748	1.31591	2.10668	1.70578	0.376782	0.119279	0.107593	0.209399	Testis
FBgn0036714	-0.652478	3.88775	49.3069	0.000108247	0.0406125	CG7692	CG7692		17.6473	19.4879	19.2611	16.8724	11.1296	11.5701	10.8669	11.3494	Testis
FBgn0052259	-4.50899	0.0452966	49.113	0.000109753	0.0406125	CG32259	CG32259		1.00544	1.06526	2.78383	2.44742	0.144916	0	0.0358644	0.0837596	Testis

## Sheet: G0 S–W– vs. S+W–
GO enrichment of 27 downgulated genes at T1 in S–W– vs. S+W– comparison. Number of Genes in this list not analysed in this widget: 8
GO Term	Pvalue	Gene_id	GO	Number of genes
dosage compensation complex assembly involved in dosage compensation by hyperactivation of X chromosome	0.000451882	FBgn0005616 FBgn0019660 FBgn0019661	GO:0016457	3
dosage compensation complex assembly	0.000902574	FBgn0005616 FBgn0019660 FBgn0019661	GO:0042714	3
dosage compensation by hyperactivation of X chromosome	0.020312	FBgn0005616 FBgn0019660 FBgn0019661	GO:0009047	3

## Sheet: DE S–W– vs. S–Lh
Diferentially upregulated genes in S–W– vs. S–Lh comparison. Time 1, 24 hours post wasp attack, log2 FC is reported in tables.
Gene_id	log2FC	logCPM	F	PValue	FDR	Secondary_identifier	Gene_symbol	Gene_name	cpm (S–W–_1)	cpm (S–W–_2)	cpm (S–W–_3)	cpm (S–W–_4)	cpm (S–Lh_1)	cpm (S–Lh_2)	cpm (S–Lh_3)	cpm (S–Lh_4)
FBgn0261560	1.44681	5.83748	102.821	8.0688e-06	0.0407353	CG8846	Thor	Thor	29.5739	32.3963	29.8697	31.3715	78.4903	109.488	73.4189	71.0674
Diferentially downregulated genes in S–W– vs. S–Lh comparison. Time 1, 24 hours post wasp attack, log2 FC is reported in tables.
Gene_id	log2FC	logCPM	F	PValue	FDR	Secondary_identifier	Gene_symbol	Gene_name	cpm (S–W–_1)	cpm (S–W–_2)	cpm (S–W–_3)	cpm (S–W–_4)	cpm (S–Lh_1)	cpm (S–Lh_2)	cpm (S–Lh_3)	cpm (S–Lh_4)
FBgn0029167	-0.969946	8.20866	118.618	4.73422e-06	0.0407353	CG7002	Hml	Hemolectin	394.377	392.015	368.256	419.658	210.817	215.843	167.687	202.286
FBgn0013672	-2.25908	10.0134	90.7996	1.35758e-05	0.0456917	CG34073	mt:ATPase6	mitochondrial ATPase subunit 6	2368.62	1216.71	1753.36	1538.65	479.504	324.01	271.635	352.153

## Sheet: DE S–Lh vs. S+Lh
Diferentially upregulated genes in S–Lh vs. S+Lh comparison. Time 1, 24 hours post wasp attack, log2 FC is reported in tables.
Gene_id	log2FC	logCPM	F	PValue	FDR	Secondary_identifier	Gene_symbol	Gene_name
N/A	N/A	N/A	N/A	N/A	N/A	N/A	N/A	N/A
Diferentially downregulated genes in S–Lh vs. S+Lh comparison. Time 1, 24 hours post wasp attack, log2 FC is reported in tables.
Gene_id	log2FC	logCPM	F	PValue	FDR	Secondary_identifier	Gene_symbol	Gene_name	Status	cpm (S–Lh_1)	cpm (S–Lh_2)	cpm (S–Lh_3)	cpm (S–Lh_4)	cpm (S+Lh_1)	cpm (S+Lh_2)	cpm (S+Lh_3)	cpm (S+Lh_4)	Tissue enrichment
FBgn0019660	-8.87504	5.87506	644.338	9.25824e-09	9.336e-05	CR32665	lncRNA:roX2	long non-coding RNA on the X	Induced by Spiroplasma presence	82.3779	112.1	104.842	160.707	0.270034	0.178304	0.194587	0.357878
FBgn0036809	-6.53935	0.696312	235.15	3.99562e-07	0.00201459	CG12477	CG12477		Induced by Spiroplasma presence	3.98603	2.33543	2.71784	3.10802	0	0.044576	0.0324312	0.0397642	Testis
FBgn0030667	-5.29601	0.740603	141.411	2.8778e-06	0.00638935	CG15599	CG15599		Induced by Spiroplasma presence	3.98603	2.15105	2.15938	4.09348	0.0385763	0.044576	0.0648624	0.159057	Testis
FBgn0038277	-2.81741	1.55206	133.342	3.33937e-06	0.00638935	CG7014	RpS5b	Ribosomal protein S5b	Induced by Spiroplasma presence	6.15128	4.11773	4.46768	5.07895	0.462915	0.624064	0.81078	0.994105
FBgn0031296	-5.51646	1.47376	131.899	3.85199e-06	0.00638935	CG4415	CG4415		Induced by Spiroplasma presence	6.10207	4.02554	3.7603	7.08779	0.0771525	0.089152	0.227018	0.0397642	Testis
FBgn0034837	-6.32179	1.90274	126.941	4.43529e-06	0.00638935	CG9871	RpL22-like	Ribosomal protein L22-like	Induced by Spiroplasma presence	9.30073	5.3469	6.10583	7.92165	0.115729	0.089152	0	0.159057	Testis
FBgn0035608	-5.11915	1.97067	117.931	5.81078e-06	0.00649	CG10630	blanks	blanks	Induced by Spiroplasma presence	11.0723	5.07033	5.88245	7.69424	0.192881	0.044576	0.291881	0.318114	Testis
FBgn0019661	-2.44393	8.52691	114.005	5.97618e-06	0.00649	CR32777	lncRNA:roX1	long non-coding RNA on the X	Induced by Spiroplasma presence	696.669	521.261	475.212	768.173	123.367	128.111	84.386	129.353
FBgn0262104	-6.95706	-0.0740654	112.658	6.72605e-06	0.00649	CG42857	CG42857		Induced by Spiroplasma presence	2.21446	1.29063	1.04246	2.38787	0	0	0.0324312	0	Testis
FBgn0034998	-5.1051	-0.0215738	91.6756	1.42388e-05	0.0095723	CG13577	CG13577		Induced by Spiroplasma presence	2.21446	1.2599	1.48923	2.08465	0.115729	0	0.0324312	0.0397642	Testis
FBgn0028852	-8.23937	-0.341185	277.082	1.81475e-05	0.0104261	CG15262	CG15262		Induced by Spiroplasma presence	1.57473	1.07553	1.452	1.55401	0	0	0	0	Testis
FBgn0013813	-2.77807	0.101673	79.5508	2.22744e-05	0.0118219	CG1842	Dhc98D	Dynein heavy chain at 89D	Induced by Spiroplasma presence	1.96841	1.59792	1.22861	2.12255	0.231458	0.133728	0.25945	0.397642	Testis
FBgn0029754	-3.7215	-0.0583702	74.0684	3.00219e-05	0.0122983	CG15930	CG15930		Induced by Spiroplasma presence	1.72236	1.38282	1.3403	2.08465	0.0385763	0.133728	0.227018	0.0795284	Testis
FBgn0039129	-3.24164	0.932075	61.1646	6.09974e-05	0.0219678	CG5338	RpS19b	Ribosomal protein S19b	Induced by Spiroplasma presence	4.57655	2.70418	2.34553	3.56285	0.30861	0.22288	0.194587	0.715756	Testis
FBgn0038191	-2.68656	0.305222	57.5537	7.22745e-05	0.0251316	CG9925	CG9925		Induced by Spiroplasma presence	2.06683	1.7823	1.67538	2.42577	0.154305	0.267456	0.25945	0.596463	Testis
FBgn0052259	-4.11787	0.227029	51.5863	0.000109835	0.0357283	CG32259	CG32259		Induced by Spiroplasma presence	2.31288	1.56719	1.8243	2.50157	0.192881	0.178304	0.0972936	0	Testis
FBgn0030647	-5.01462	0.73941	50.9645	0.000114484	0.0360767	CG6324	CG6324		Induced by Spiroplasma presence	4.13366	2.58126	2.08492	3.52495	0.0385763	0.044576	0.25945	0	Testis
FBgn0036224	-8.63189	0.0170385	120.677	0.000147392	0.0424658	CG7257	Rpt4R	Regulatory particle triple-A ATPase 4-related	Induced by Spiroplasma presence	3.00182	1.22917	1.22861	2.04674	0	0	0	0	Testis
FBgn0035571	-3.66346	0.54604	45.2942	0.000170799	0.0478022	CG12493	CG12493		Induced by Spiroplasma presence	4.47813	1.59792	2.04769	2.16045	0.154305	0.178304	0.0648624	0.437406	Testis
FBgn0083058	-2.0494	6.54655	138.175	2.92373e-06	0.00638935	CR34633	snoRNA:Psi18S-1086	snoRNA:Psi18S-1086	Only by Spiroplasma_Lh14_interaction	134.59	133.795	134.44	189.816	39.0006	29.8659	38.3012	40.8776
FBgn0034435	-7.09851	1.59152	111.73	7.07953e-06	0.00649	CG9975	fest	wurstfest	Only by Spiroplasma_Lh14_interaction	8.95626	2.70418	3.94645	7.65633	0.0385763	0.044576	0	0.0795284
FBgn0086666	-1.44294	5.31589	100.042	9.6711e-06	0.0077035	CR33918	snoRNA:Psi28S-2179	snoRNA:Psi28S-2179	Only by Spiroplasma_Lh14_interaction	59.8888	53.2539	52.1229	63.9417	19.9825	17.4292	25.4909	24.2562
FBgn0083015	-1.50401	4.06766	99.3213	9.93112e-06	0.0077035	CR34641	snoRNA:Psi18S-920	snoRNA:Psi18S-920	Only by Spiroplasma_Lh14_interaction	19.3396	26.1199	23.8649	27.7068	8.37105	8.46944	9.46991	9.02647
FBgn0038612	-2.77576	-0.0548957	91.3921	1.34633e-05	0.0095723	CG7676	cona	corona	Only by Spiroplasma_Lh14_interaction	1.82078	1.10625	1.41477	1.81933	0.192881	0.178304	0.324312	0.198821
FBgn0082963	-1.64149	3.31719	83.7839	1.84663e-05	0.0104261	CR34549	snoRNA:Psi28S-3378	snoRNA:Psi28S-3378	Only by Spiroplasma_Lh14_interaction	17.8141	13.1214	14.8178	13.3796	5.20779	3.43235	5.54573	5.36817
FBgn0083041	-2.05785	3.10351	84.3051	1.86106e-05	0.0104261	CR34600	snoRNA:Psi18S-1854b	snoRNA:Psi18S-1854b	Only by Spiroplasma_Lh14_interaction	14.8615	12.2303	11.467	15.6917	2.9318	3.25405	4.54037	2.58467
FBgn0034822	-8.85013	0.223129	244.196	2.4909e-05	0.0121703	CG9873	RpL37b	Ribosomal protein L37b	Only by Spiroplasma_Lh14_interaction	2.70656	1.75157	1.56369	2.65318	0	0	0	0
FBgn0265089	-6.16397	-0.10398	77.7763	2.61586e-05	0.0121703	CG8023	eIF4E3	eukaryotic translation initiation factor 4E3	Only by Spiroplasma_Lh14_interaction	2.85419	1.07553	1.00523	1.85723	0	0.044576	0	0.0397642
FBgn0026175	-5.28466	-0.136643	77.3892	2.65516e-05	0.0121703	CG11941	SkpC	SKP1-related C	Only by Spiroplasma_Lh14_interaction	2.21446	1.16771	1.452	1.66772	0.0771525	0	0.0648624	0
FBgn0035727	-4.14044	0.121248	76.1094	2.77695e-05	0.0121751	CG10063	CG10063		Only by Spiroplasma_Lh14_interaction	2.26367	1.69011	1.67538	1.97094	0.0385763	0.133728	0.0324312	0.238585
FBgn0083040	-2.04256	6.1265	73.2853	3.13957e-05	0.0122983	CR34598	snoRNA:Psi18S-1854c	snoRNA:Psi18S-1854c	Only by Spiroplasma_Lh14_interaction	98.5681	89.4222	99.8527	154.643	19.4039	29.0636	32.4961	29.9424
FBgn0086672	-1.64331	7.33225	71.3723	3.2891e-05	0.0122983	CR33637	snoRNA:Or-aca5	snoRNA:Or-aca5	Only by Spiroplasma_Lh14_interaction	194.43	264.272	243.861	256.563	89.0726	70.8758	88.8939	67.0822
FBgn0002962	-2.5425	0.062586	71.3494	3.29288e-05	0.0122983	CG5637	nos	nanos	Only by Spiroplasma_Lh14_interaction	2.21446	1.07553	1.26584	2.04674	0.231458	0.267456	0.324312	0.318114
FBgn0082922	-1.53837	6.0515	51.4213	0.000106795	0.0357283	CR34543	snoRNA:Or-aca4	snoRNA:Or-aca4	Only by Spiroplasma_Lh14_interaction	74.1106	96.5207	112.511	103.777	38.6148	25.9878	41.4146	31.6125
FBgn0086669	-1.43324	2.82328	49.3319	0.000120756	0.0369001	CR33765	snoRNA:Psi18S-841a	snoRNA:Psi18S-841a	Only by Spiroplasma_Lh14_interaction	11.1707	8.41983	9.23321	11.5224	4.47485	2.62998	3.43771	4.93076
FBgn0267520	-11.7219	12.3878	48.275	0.000137695	0.0408387	CR45860	28SrRNA-Psi:CR45860	28S ribosomal RNA pseudogene:CR45860	Only by Spiroplasma_Lh14_interaction	34198.7	1075.1	5992.46	1872.24	6.71227	0.980672	2.56206	2.54491
FBgn0083010	-1.26809	4.72949	44.2389	0.000175395	0.0478022	CR34604	snoRNA:Psi28S-1135c	snoRNA:Psi28S-1135c	Only by Spiroplasma_Lh14_interaction	33.2169	34.3246	35.1085	44.5356	14.6976	13.6403	20.5938	13.9572

## Sheet: DE S–W– vs. S–Gh 
Diferentially upregulated genes in S–W– vs. S–Gh comparison. Time 1, 24 hours post wasp attack, log2 FC is reported in tables.
Gene_id	log2FC	logCPM	F	PValue	FDR	Secondary_identifier	Gene_symbol	Gene_name	cpm (S–W–_1)	cpm (S–W–_2)	cpm (S–W–_3)	cpm (S–W–_4)	cpm (S–Gh_1)	cpm (S–Gh_2)	cpm (S–Gh_3)	cpm (S–Gh_4)		Notes.1	Notes.2
FBgn0040104	4.31815	7.78506	977.864	1.98678e-09	1.81935e-05	CG3410	lectin-24A	lectin-24A	23.5556	22.3148	20.3391	17.1662	520.395	445.573	402.788	340.358			Detected by Salazar-Jaramillo L. et al 2017
FBgn0261363	9.39691	5.56084	838.552	3.58528e-09	1.81935e-05	CG42640	PPO3	Prophenoloxidase 3	0.0693832	0.125364	0.187977	0.148304	92.4299	70.1887	113.009	104.202		Also up T2	Detected by Salazar-Jaramillo L. et al 2017
FBgn0032638	6.50992	8.98835	584.593	1.42867e-08	4.83319e-05	CG6639	SPH93	Serine protease homolog 93	7.38931	10.7813	14.587	10.4925	1128.51	1150.53	926.757	871.78			Detected by Salazar-Jaramillo L. et al 2017
FBgn0041183	5.71426	8.17764	520.416	2.22826e-08	5.65365e-05	CG18096	Tep1	Thioester-containing protein 1	10.0953	10.7813	9.51163	12.3093	825.772	637.167	481.143	381.763			Detected by Salazar-Jaramillo L. et al 2017
FBgn0265668	11.5213	4.474	491.892	2.85802e-08	5.80122e-05	CG44475	CG44475		0	0	0.0375954	0	32.4674	59.7521	44.9534	40.7166
FBgn0051219	8.77714	1.76792	397.772	6.20719e-08	0.000104995	CG31219	CG31219		0	0	0	0.0370761	8.70137	5.76848	6.38021	5.99607
FBgn0028514	6.5549	4.80781	364.56	8.85486e-08	0.000116655	CG4793	CG4793		0.416299	0.814866	0.714312	0.407837	59.6961	79.0248	41.242	44.0792			Detected by Salazar-Jaramillo L. et al 2017
FBgn0053462	9.43986	3.64579	360.41	9.19536e-08	0.000116655	CG33462	CG33462		0.0693832	0.062682	0	0	19.3265	30.9097	26.8136	22.7689			Detected by Salazar-Jaramillo L. et al 2017
FBgn0035623	3.09611	4.26243	329.506	1.26889e-07	0.000134593	CG17795	mthl2	methuselah-like 2	3.64262	3.1341	4.43625	4.44913	39.6593	28.4089	37.489	33.2215			Detected by Salazar-Jaramillo L. et al 2017
FBgn0041710	3.02496	3.19795	325.689	1.32617e-07	0.000134593	CG18550	yellow-f	yellow-f	2.0468	1.50437	1.76698	2.44702	15.7157	16.5719	15.8463	17.259			Detected by Salazar-Jaramillo L. et al 2017
FBgn0262531	4.17065	6.44693	310.547	1.58824e-07	0.000146537	CG43085	CG43085		12.8359	6.51893	8.87251	7.97137	219.073	168.62	142.074	143.582		Also Up at T2	Detected by Salazar-Jaramillo L. et al 2017
FBgn0069056	3.35991	4.15681	295.089	1.92672e-07	0.000162952	CG33226	CG33226		3.36509	3.44751	2.10534	3.55931	28.827	39.279	31.9845	30.3855			Detected by Salazar-Jaramillo L. et al 2017
FBgn0033756	2.04731	2.01402	273.445	2.56928e-07	0.000200581	CG17760	CG17760		1.49174	1.50437	1.42862	1.63135	5.80091	6.76879	6.54702	6.56327			Detected by Salazar-Jaramillo L. et al 2017
FBgn0034221	2.73641	3.93861	248.665	3.67577e-07	0.000263945	CG10764	CG10764		4.89152	3.44751	3.2708	4.07837	24.5059	33.2771	25.4375	23.8627			Detected by Salazar-Jaramillo L. et al 2017
FBgn0031470	5.81746	2.00964	244.767	3.90105e-07	0.000263945	CG18557	CG18557		0.173458	0.062682	0.0375954	0.222457	7.04397	8.96948	8.13165	7.04944			Detected by Salazar-Jaramillo L. et al 2017
FBgn0037477	7.49429	3.8762	214.07	7.81675e-07	0.000495827	CG14610	CG14610		0.0693832	0.188046	0.0751908	0.296609	18.0539	25.0079	34.1529	38.8934			Detected by Salazar-Jaramillo L. et al 2017
FBgn0034880	2.00184	4.34213	174.54	1.38378e-06	0.000826118	CG5372	ItgaPS5	Integrin alphaPS5 subunit	8.2566	6.58161	7.81984	9.08365	40.1329	27.7087	35.7375	27.8736			Detected by Salazar-Jaramillo L. et al 2017
FBgn0050091	3.08775	1.74454	168.565	1.57523e-06	0.00088817	CG30091	CG30091		0.450991	0.564138	0.864694	0.778599	6.98478	5.00157	6.33851	5.34785			Detected by Salazar-Jaramillo L. et al 2017
FBgn0053461	5.43107	3.80351	166.821	1.849e-06	0.000987656	CG33461	CG33461		0.346916	0.376092	0.563931	1.11228	22.0198	36.078	26.9804	24.1463			Detected by Salazar-Jaramillo L. et al 2017
FBgn0031471	7.08649	3.33453	164.38	2.1002e-06	0.0010178	CG3117	CG3117		0.312224	0.062682	0	0.148304	19.0306	25.6414	18.7653	16.7728			Detected by Salazar-Jaramillo L. et al 2017
FBgn0041182	1.83885	7.91233	155.881	2.10599e-06	0.0010178	CG7052	Tep2	Thioester-containing protein 2	107.613	102.987	99.3646	105.778	484.672	439.638	290.946	319.007			Detected by Salazar-Jaramillo L. et al 2017
FBgn0034005	5.85841	4.27656	162.514	2.29536e-06	0.00105889	CG16827	ItgaPS4	Integrin alphaPS4 subunit	0.381608	0.689502	0.864694	0.630294	19.7409	32.3768	46.2044	52.9923			Detected by Salazar-Jaramillo L. et al 2017
FBgn0053225	6.86405	2.52643	150.601	2.48325e-06	0.00109576	CG33225	CG33225		0.104075	0	0.187977	0.0370761	8.31662	7.70242	14.0949	15.0307		Also up T2	Detected by Salazar-Jaramillo L. et al 2017
FBgn0031547	1.57476	3.8817	143.302	2.87494e-06	0.00121574	CG3212	Sr-CIV	Scavenger receptor class C, type IV	9.05451	6.2682	6.24083	7.52645	24.2987	19.5395	23.3107	21.7965
FBgn0053460	2.78388	3.75312	132.55	3.83225e-06	0.00155574	CG33460	CG33460		2.42841	3.76092	3.2332	3.96714	18.8234	31.4766	23.7277	20.176			Detected by Salazar-Jaramillo L. et al 2017
FBgn0264776	1.07908	4.41556	129.588	4.16427e-06	0.00162551	CG44014	CG44014		14.2236	13.8527	11.9929	13.9406	29.8925	33.5105	27.8144	25.6454			Detected by Salazar-Jaramillo L. et al 2017
FBgn0262794	5.72548	5.95262	127.318	6.10683e-06	0.00229549	CG43175	CG43175		1.49174	1.25364	3.04523	3.07732	79.6442	198.429	108.005	101.65			Detected by Salazar-Jaramillo L. et al 2017
FBgn0262965	4.25084	2.07497	114.751	6.50084e-06	0.00235632	CR43276	CR43276		0.312224	0.188046	0.601526	0.444913	4.82423	10.0698	8.79886	7.73817
FBgn0039108	1.1482	4.42915	108.777	7.89941e-06	0.00276452	CG10232	CG10232		12.1421	14.8556	13.9103	11.8273	29.0934	33.7439	27.6476	29.089		Also up T2
FBgn0085465	3.50686	3.74914	106.322	9.00573e-06	0.00304664	CG34436	CG34436		1.31828	1.88046	2.78206	2.44702	18.3202	36.3448	22.1848	21.9181			Detected by Salazar-Jaramillo L. et al 2017
FBgn0039759	2.37829	0.194648	97.2143	1.18744e-05	0.00388753	CG9733	CG9733		0.312224	0.250728	0.300763	0.444913	1.62781	1.76722	2.21014	1.58005			Detected by Salazar-Jaramillo L. et al 2017
FBgn0039593	1.53031	4.00034	91.3504	1.48612e-05	0.00460235	CG9989	Sid	Stress induced DNase	9.19328	8.14866	7.25591	7.78599	31.3131	27.1085	20.6419	17.3805			Detected by Salazar-Jaramillo L. et al 2017
FBgn0033821	2.10421	5.91845	91.1743	1.49648e-05	0.00460235	CG10799	CG10799		23.4515	19.8075	24.1362	22.4311	87.7832	143.245	73.6852	91.0755			Detected by Salazar-Jaramillo L. et al 2017
FBgn0030098	0.86752	5.43819	85.9258	1.8515e-05	0.00552672	CG12057	CG12057		31.5694	28.9591	29.2492	31.2181	53.5105	61.9861	58.8398	51.6148
FBgn0262808	2.42654	5.40337	82.3065	2.18191e-05	0.00632691	CG43179	CG43179		10.3034	9.96644	18.6473	12.9025	72.393	92.7958	67.8054	55.5042			Detected by Salazar-Jaramillo L. et al 2017
FBgn0028430	1.75908	4.44412	80.3736	2.35073e-05	0.0066271	CG31770	He	Hemese	8.84636	8.39939	10.6019	11.0116	25.3938	33.7773	36.8218	38.5288
FBgn0031888	1.50933	2.00218	78.0418	2.61054e-05	0.00716063	CG13780	Pvf2	PDGF- and VEGF-related factor 2	2.11619	1.81778	2.14294	1.92796	7.28074	6.90217	4.42028	4.98322
FBgn0038299	1.75226	6.49479	69.665	3.90192e-05	0.010154	CG6687	Spn88Eb	Serpin 88Eb	37.2935	31.2783	49.4755	43.8611	118.919	172.954	145.994	122.555			Detected by Salazar-Jaramillo L. et al 2017
FBgn0003888	2.06828	5.56989	68.188	4.20756e-05	0.0106756	CG3401	betaTub60D	beta-Tubulin at 60D	22.8618	23.8192	11.3162	14.8675	71.7123	61.2859	84.3189	91.4401			Detected by Salazar-Jaramillo L. et al 2017
FBgn0024150	0.760581	4.48125	60.4812	6.39912e-05	0.0150077	CG10564	Ac78C	Adenylyl cyclase 78C	16.6173	15.4825	17.8578	15.2012	27.3768	27.6754	27.8561	30.1829
FBgn0033820	4.52436	2.64431	62.925	6.50646e-05	0.0150077	CG4716	CG4716		0.485682	0.814866	0.263168	0.519066	5.20898	21.9736	8.25675	11.668			Detected by Salazar-Jaramillo L. et al 2017
FBgn0042106	3.17455	2.151	59.372	6.8239e-05	0.0153902	CG18754	CG18754		1.07544	0.188046	0.789503	1.22351	10.3588	7.23561	6.63042	7.69766			Detected by Salazar-Jaramillo L. et al 2017
FBgn0032639	3.50923	4.49194	59.8415	8.228e-05	0.0181535	CG18563	CG18563		1.59581	2.31924	5.63931	4.44913	41.1095	56.8845	37.0303	31.8035			Detected by Salazar-Jaramillo L. et al 2017
FBgn0039798	2.46455	5.72732	54.7706	9.8179e-05	0.0212004	CG11313	CG11313		8.98513	11.4081	23.4595	19.3537	86.5402	96.2969	95.3696	83.7424			Detected by Salazar-Jaramillo L. et al 2017
FBgn0040582	5.21209	2.11961	53.1062	0.000116446	0.0245663	CG5791	BomBc3	Bomanin Bicipital 3	0.138766	0.250728	0.300763	0.185381	1.86458	7.73576	12.7187	10.6147			Detected by Salazar-Jaramillo L. et al 2017
FBgn0044047	0.693727	2.24618	50.5559	0.000118607	0.0245663	CG14049	Ilp6	Insulin-like peptide 6	3.50385	3.8236	3.68435	3.07732	5.86011	5.86851	5.7964	5.7935
FBgn0034011	2.98847	5.87148	50.4704	0.000142518	0.0278157	CG8160	CG8160		21.5782	16.6734	4.8874	9.38026	131.29	106.233	98.7474	86.4569
FBgn0262683	3.12743	4.28559	49.1783	0.000156788	0.0299805	CG43153	CG43153		2.0468	2.94606	6.01526	4.48621	20.2144	48.9154	37.6141	32.8568			Detected by Salazar-Jaramillo L. et al 2017
FBgn0050288	3.08915	1.65374	46.0728	0.000162472	0.0299805	CG30288	CG30288		0.381608	0.250728	1.16546	0.630294	3.84755	6.76879	6.08831	5.30733
FBgn0265652	2.13159	5.3996	46.2355	0.0001711	0.0310088	CR44459	lncRNA:CR44459	long non-coding RNA:CR44459	11.7605	10.1545	21.7677	17.4258	56.5885	60.3856	92.3672	66.8076
FBgn0003117	0.914894	2.20316	43.8326	0.00019208	0.0342003	CG3978	pnr	pannier	3.26101	3.07142	2.59408	3.44808	7.66549	5.00157	5.5462	5.83402
FBgn0053056	0.695335	4.35694	43.2113	0.000201472	0.034477	CG33056	CG33056		17.0336	15.9839	12.7448	15.9427	31.6387	22.307	24.1864	24.511
FBgn0038894	0.887245	3.03336	43.0614	0.000203825	0.034477	CG15497	CG15497		5.03028	5.01456	5.6769	6.63663	11.0099	10.9368	9.34097	11.3034
FBgn0265577	7.7568	4.37177	44.0714	0.000248532	0.0400373	CG44404	IBIN	Induced by Infection	0.0693832	0.062682	0.375954	0.185381	4.70584	95.1632	31.9011	31.1958
FBgn0038214	0.986478	4.93359	39.9831	0.000260784	0.0413546	CG9616	CG9616		21.0231	18.5539	23.3843	17.6482	36.9956	49.5822	42.4514	34.599			Detected by Salazar-Jaramillo L. et al 2017
FBgn0032322	0.990878	5.54426	39.7481	0.000265913	0.0415192	CG16743	CG16743		28.8981	33.7229	34.8885	25.6567	70.4101	74.9235	59.2568	47.1583
FBgn0262587	1.92876	5.10525	39.8502	0.000278018	0.0415991	CG43124	CG43124		13.0094	8.08598	17.8202	16.9067	39.6297	65.1538	60.9665	52.8708			Detected by Salazar-Jaramillo L. et al 2017
FBgn0028396	6.7109	5.19471	42.5052	0.000278721	0.0415991	CG31509	TotA	Turandot A	0.173458	0.062682	1.6166	0.704446	19.2969	86.6272	119.348	62.4726		Also up T2	Detected by Salazar-Jaramillo L. et al 2017
FBgn0053542	1.0707	0.109232	38.9832	0.000283511	0.0417008	CG33542	upd3	unpaired 3	0.693832	0.689502	0.526335	0.630294	1.47983	1.6005	1.25102	1.13439
FBgn0053470	12.0291	3.31904	107.13	0.000337974	0.0476403	CG33470	CG33470		0	0	0	0	10.3884	29.676	28.565	10.5742
Diferentially downregulated genes in S–W– vs. S–Gh comparison. Time 1, 24 hours post wasp attack, log2 FC is reported in tables.
Gene_id	log2FC	logCPM	F	PValue	FDR	Secondary_identifier	Gene_symbol	Gene_name	cpm (S–W–_1)	cpm (S–W–_2)	cpm (S–W–_3)	cpm (S–W–_4)	cpm (S–Gh_1)	cpm (S–Gh_2)	cpm (S–Gh_3)	cpm (S–Gh_4)
FBgn0011828	-0.893684	6.45428	72.063	3.46283e-05	0.00924849	CG12002	Pxn	Peroxidasin	113.303	111.95	98.4999	126.355	61.2944	56.7512	68.1807	61.6623
FBgn0029167	-0.706531	8.32793	62.6599	5.6573e-05	0.0136705	CG7002	Hml	Hemolectin	394.478	391.951	367.871	419.368	257.608	224.637	233.899	271.808
FBgn0083124	-0.764457	3.41509	37.5159	0.000321577	0.0459674	Uhg4	U snoRNA host gene 4		11.4482	11.9723	13.7599	15.3124	8.55339	7.5357	7.71464	8.02177

## Sheet: GO S–W– vs. S0Gh
GO enrichment of 60 upregulated genes at T1 in S–W– vs. S–Gh comparison. Number of Genes in this list not analysed in this widget: 21
GO Term	Pvalue	Gene_id	GO	Number of genes
proteolysis	1.63565e-07	FBgn0028514,FBgn0031470,FBgn0031471,FBgn0032638,FBgn0032639,FBgn0034221,FBgn0038299,FBgn0039108,FBgn0039759,FBgn0039798,FBgn0042106,FBgn0050091,FBgn0050288,FBgn0051219,FBgn0053460,FBgn0053461,FBgn0053462,FBgn0069056,FBgn0085465,FBgn0262587	GO:0006508	20
response to biotic stimulus	0.00639783	FBgn0003117,FBgn0028396,FBgn0028430,FBgn0031888,FBgn0032638,FBgn0038299,FBgn0039593,FBgn0041182,FBgn0041183,FBgn0053542,FBgn0261363	GO:0009607	11
response to external biotic stimulus	0.00639783	FBgn0003117,FBgn0028396,FBgn0028430,FBgn0031888,FBgn0032638,FBgn0038299,FBgn0039593,FBgn0041182,FBgn0041183,FBgn0053542,FBgn0261363	GO:0043207	11
response to other organism	0.00639783	FBgn0003117,FBgn0028396,FBgn0028430,FBgn0031888,FBgn0032638,FBgn0038299,FBgn0039593,FBgn0041182,FBgn0041183,FBgn0053542,FBgn0261363	GO:0051707	11
immune system process	0.0392257	FBgn0003117,FBgn0028430,FBgn0028514,FBgn0031547,FBgn0031888,FBgn0034221,FBgn0041182,FBgn0041183,FBgn0053542,FBgn0261363	GO:0002376	10
Pathway enrichment of 60 upregulated genes at T1 in S–W– vs. S–Gh comparison. KEEG and Reactome datasets. Number of Genes in this list not analysed in this widget: 49
Pathway	Pvalue	Gene_id	Number of genes
Hemostasis	0.000625836	FBgn0003888,FBgn0033756,FBgn0033756, FBgn0034880, FBgn0038299, FBgn0041182, FBgn0003117	7
Protein domain of 60 upregulated genes at T1 in S–W– vs. S–Gh comparison. Number of Genes in this list not analysed in this widget: 20
Protein domain	Pvalue	Gene_id	Number of genes
Serine proteases, trypsin domain	7.64e-18	FBgn0028514,FBgn0031470,FBgn0031471,FBgn0032638,FBgn0032639,FBgn0034221,FBgn0039108,FBgn0039759,FBgn0039798,FBgn0042106,FBgn0050091,FBgn0050288,FBgn0051219,FBgn0053225,FBgn0053460,FBgn0053461,FBgn0053462,FBgn0069056,FBgn0085465,FBgn0262587	20
Peptidase S1, PA clan	1.13e-17	FBgn0028514,FBgn0031470,FBgn0031471,FBgn0032638,FBgn0032639,FBgn0034221,FBgn0039108,FBgn0039759,FBgn0039798,FBgn0042106,FBgn0050091,FBgn0050288,FBgn0051219,FBgn0053225,FBgn0053460,FBgn0053461,FBgn0053462,FBgn0069056,FBgn0085465,FBgn0262587	20
Peptidase S1A, chymotrypsin family	3.25e-11	FBgn0031470,FBgn0032638,FBgn0034221,FBgn0039108,FBgn0039759,FBgn0039798,FBgn0042106,FBgn0050091,FBgn0050288,FBgn0051219,FBgn0053225,FBgn0053460,FBgn0053461,FBgn0053462,FBgn0069056	15
Serine proteases, trypsin family, histidine active site	0.0049401	FBgn0034221,FBgn0039108,FBgn0039759,FBgn0039798,FBgn0042106,FBgn0050091,FBgn0053462,FBgn0069056	8
Serine proteases, trypsin family, serine active site	0.0151942	FBgn0034221,FBgn0039108,FBgn0039759,FBgn0039798,FBgn0050288,FBgn0051219,FBgn0069056	7

## Sheet: S–Gh vs. S+Gh
Diferentially upregulated genes in S–Gh vs. S+Gh comparison. Time 1, 24 hours post wasp attack, log2 FC is reported in tables.
Gene_id	log2FC	logCPM	F	PValue	FDR	Secondary_identifier	Gene_symbol	Gene_name	Status	cpm (S–Gh_1)	cpm (S–Gh_2)	cpm (S–Gh_3)	cpm (S–Gh_4)	cpm (S+Gh_1)	cpm (S+Gh_2)	cpm (S+Gh_3)	cpm (S+Gh_4)
FBgn0082954	1.45095	1.11453	80.7925	1.70423e-05	0.0100101	CR34611	snoRNA:Psi28S-3571	snoRNA:Psi28S-3571	Only by Spiroplasma_Ganaspis_interaction	1.06547	1.16703	0.959117	1.25593	2.98727	3.08937	2.69011	3.56857
FBgn0065046	2.28655	4.24505	78.0276	1.93984e-05	0.010323	CR33662	snoRNA:U3:9B	snoRNA:U3:9B	Only by Spiroplasma_Ganaspis_interaction	5.65293	4.20132	6.75552	8.83205	27.3295	39.3107	25.4144	34.0818
FBgn0082986	1.69412	1.59882	72.9131	2.49329e-05	0.0114589	CR34616	snoRNA:Psi28S-2562	snoRNA:Psi28S-2562	Only by Spiroplasma_Ganaspis_interaction	1.33184	1.73388	1.37612	1.09388	4.64238	5.73741	3.39803	4.45068
FBgn0004428	1.64892	4.48633	64.57	3.89482e-05	0.0157522	CG1180	LysE	Lysozyme E	Only by Spiroplasma_Ganaspis_interaction	13.0521	10.47	12.1349	7.49509	39.8437	34.2353	39.4667	23.2157
FBgn0083057	2.28112	2.54217	63.2068	4.20987e-05	0.0163715	CR34631	snoRNA:Psi18S-110	snoRNA:Psi18S-110	Only by Spiroplasma_Ganaspis_interaction	1.62781	1.40044	2.04334	2.71444	6.78191	11.9792	7.99953	11.5076
FBgn0044030	0.718619	4.12114	51.2982	8.92688e-05	0.0273514	CG32531	mRpS14	mitochondrial ribosomal protein S14	Only by Spiroplasma_Ganaspis_interaction	13.4664	11.737	12.4685	14.3825	24.8266	22.4452	19.4325	20.2486
FBgn0024558	0.606515	4.88284	49.8727	9.86656e-05	0.0292636	CG31289	Dph5	Diphthamide methyltransferase	Only by Spiroplasma_Ganaspis_interaction	23.4404	23.0072	23.5609	22.7284	34.5958	39.7836	32.1397	36.4876
FBgn0041721	1.15621	4.76428	38.6821	0.000239216	0.0483742	CR32162	snRNA:U12	small nuclear RNA U12	Only by Spiroplasma_Ganaspis_interaction	16.7516	13.5376	19.0572	17.34	39.6823	50.9116	28.5293	32.1171
Diferentially downregulated genes in S–Gh vs. S+Gh comparison. Time 1, 24 hours post wasp attack, log2 FC is reported in tables.
Gene_id	log2FC	logCPM	F	PValue	FDR	Secondary_identifier	Gene_symbol	Gene_name	Status	cpm (S–Gh_1)	cpm (S–Gh_2)	cpm (S–Gh_3)	cpm (S–Gh_4)	cpm (S+Gh_1)	cpm (S+Gh_2)	cpm (S+Gh_3)	cpm (S+Gh_4)
FBgn0029161	-1.36631	2.37002	98.2522	8.17902e-06	0.00697344	CG9131	slmo	slowmo	Only by Spiroplasma_Ganaspis_interaction	9.55967	6.23529	7.29763	6.27967	3.10838	3.15242	2.69011	2.52606
FBgn0002962	-2.91927	-0.168082	82.6422	1.56634e-05	0.0100101	CG5637	nos	nanos	Only by Spiroplasma_Ganaspis_interaction	1.18386	1.46713	1.25102	1.86364	0.121106	0.252194	0.247773	0.120289
FBgn0052017	-0.820119	4.09177	79.8292	1.78205e-05	0.0100101	CG32017	CG32017		Only by Spiroplasma_Ganaspis_interaction	25.1866	20.7065	18.5568	21.9586	11.9491	12.8304	12.4948	12.1091
FBgn0085737	-6.85465	1.27912	76.593	2.35417e-05	0.0114589	CR40502	Withdrawn		Only by Spiroplasma_Ganaspis_interaction	1.687	6.20195	7.75634	2.83598	0	0.0630484	0.0353962	0.0400963
FBgn0035896	-0.751651	5.34666	72.9713	2.48596e-05	0.0114589	CG6983	CG6983		Only by Spiroplasma_Ganaspis_interaction	52.3562	48.9821	53.2519	48.0901	28.3791	29.5382	32.0335	31.6359
FBgn0263106	-1.23673	9.54209	66.1804	3.5596e-05	0.0156483	CG10578	DnaJ-1	DnaJ-like-1	Only by Spiroplasma_Ganaspis_interaction	958.631	1210.71	981.385	1002.72	552.484	437.209	469.53	334.523
FBgn0033872	-0.828961	4.62096	65.2581	3.74697e-05	0.0157522	CG6329	CG6329		Only by Spiroplasma_Ganaspis_interaction	39.5409	29.1091	28.0229	28.7649	18.8117	16.9916	18.4414	16.8805
FBgn0033224	-1.08501	6.87319	58.3578	5.62306e-05	0.0203053	CG1553	Nop17l	Nop17 like	Only by Spiroplasma_Ganaspis_interaction	139.991	191.493	151.749	148.322	91.4347	68.313	72.5267	70.3689
FBgn0030294	-1.2976	5.53634	56.2348	6.42639e-05	0.0218959	CG11750	Pa1	PTIP associated 1	Only by Spiroplasma_Ganaspis_interaction	51.5571	79.5917	69.2232	60.4064	32.6178	29.1599	24.3172	22.1732
FBgn0039900	-0.715925	3.41154	54.978	6.96978e-05	0.0227327	CG2381	Syt7	Synaptotagmin 7	Only by Spiroplasma_Ganaspis_interaction	14.887	13.1041	12.1766	12.1947	8.39665	8.25934	8.77825	6.77627
FBgn0034304	-0.612365	4.21371	51.3415	8.90009e-05	0.0273514	CG5742	CG5742		Only by Spiroplasma_Ganaspis_interaction	22.5229	22.7738	22.5601	20.9862	15.34	13.3978	14.4416	15.5974
FBgn0001234	-1.02206	9.68506	48.7872	0.000106659	0.0299565	CR31400	lncRNA:Hsromega	Heat shock RNA omega	Only by Spiroplasma_Ganaspis_interaction	998.024	1258.96	980.176	1137.07	462.462	526.833	561.666	627.065
FBgn0052267	-0.82528	5.16039	46.5455	0.000125893	0.0344029	CG32267	CG32267		Only by Spiroplasma_Ganaspis_interaction	39.9553	46.2145	47.9976	46.6721	23.2926	27.4261	28.5293	24.2582
FBgn0032946	-0.705623	6.47173	45.7673	0.000133568	0.0355397	CG8663	nrv3	nervana 3	Only by Spiroplasma_Ganaspis_interaction	135.582	106.467	94.4105	102.622	67.0521	66.3585	72.2436	65.4371
FBgn0031896	-0.828764	2.33297	45.34	0.00013803	0.0357574	CG4502	CG4502		Only by Spiroplasma_Ganaspis_interaction	6.00809	6.56873	6.71382	5.95556	4.27906	3.1209	3.61041	3.40818
FBgn0086708	-0.902236	7.99708	43.957	0.00015381	0.0357574	CG32130	stv	starvin	Only by Spiroplasma_Ganaspis_interaction	274.3	377.052	332.855	333.39	177.42	162.949	189.192	185.766
FBgn0000357	-1.29596	0.341829	43.7207	0.000156727	0.0357574	CG6517	Cp18	Chorion protein 18	Only by Spiroplasma_Ganaspis_interaction	1.687	1.86725	1.50123	1.70159	0.888108	0.59896	0.778715	0.521251
FBgn0026401	-0.614579	7.34481	43.2046	0.000163342	0.0357574	CG17704	Nipped-B	Nipped-B	Only by Spiroplasma_Ganaspis_interaction	220.968	202.664	170.639	188.998	121.025	133.316	127.568	134.162
FBgn0083984	-0.771026	2.54129	41.2354	0.000192013	0.0404468	CG34148	CG34148		Only by Spiroplasma_Ganaspis_interaction	6.39285	8.0692	7.00572	7.29252	4.31943	4.72863	4.24754	3.80914
FBgn0013467	-0.602143	4.15247	40.7717	0.000199659	0.041199	CG18285	igl	igloo	Only by Spiroplasma_Ganaspis_interaction	25.2754	21.3067	17.7228	20.8647	14.2097	14.6588	14.1939	13.5525
FBgn0030451	-0.763993	4.21673	109.832	5.36006e-06	0.00697344	CG15717	CG15717		Only by Spiroplasma_Ganaspis_interaction	24.6539	22.7405	21.9346	23.4171	13.5638	14.5011	14.2647	12.911
FBgn0019661	-2.57417	8.63661	245.837	2.34844e-07	0.00106201	CR32777	lncRNA:roX1	long non-coding RNA on the X	Induced by Spiroplasma presence	596.902	799.985	581.142	722.324	102.455	107.214	118.719	130.594
FBgn0019660	-9.56071	6.08298	267.193	2.9106e-07	0.00106201	CR32665	lncRNA:roX2	long non-coding RNA on the X	Induced by Spiroplasma presence	56.0854	182.457	126.729	165.338	0.242211	0.0945726	0.141585	0.240578
FBgn0034837	-7.65441	2.06069	228.149	3.15106e-07	0.00106201	CG9871	RpL22-like	Ribosomal protein L22-like	Induced by Spiroplasma presence	4.46907	9.16955	9.04906	9.52079	0.0403685	0.0630484	0	0.0400963
FBgn0038191	-2.81888	0.297998	145.245	1.83446e-06	0.00463704	CG9925	CG9925		Induced by Spiroplasma presence	1.80539	2.26738	2.00164	1.98519	0.28258	0.189145	0.318565	0.360866
FBgn0036809	-7.89948	0.755965	135.545	2.3951e-06	0.00484338	CG12477	CG12477		Induced by Spiroplasma presence	1.59821	3.40107	4.08667	3.68677	0.0403685	0	0	0
FBgn0005616	-1.21208	3.63682	120.023	3.82032e-06	0.00643787	CG3241	msl-2	male-specific lethal 2	Induced by Spiroplasma presence	15.5678	19.2394	16.2216	17.502	7.42781	7.25057	7.96414	7.33761
FBgn0038277	-2.62237	1.2714	107.918	5.73082e-06	0.00697344	CG7014	RpS5b	Ribosomal protein S5b	Induced by Spiroplasma presence	2.81167	3.80119	3.87817	5.46939	0.726633	0.630484	0.707923	0.561348
FBgn0030647	-5.72604	0.938104	105.075	6.34268e-06	0.00697344	CG6324	CG6324		Induced by Spiroplasma presence	2.42691	4.60145	2.79395	4.49705	0.0403685	0	0.106189	0.120289
FBgn0030667	-6.22714	0.684902	100.436	7.52641e-06	0.00697344	CG15599	CG15599		Induced by Spiroplasma presence	1.30225	4.00126	3.04415	3.64626	0	0.0315242	0.0707923	0.0400963
FBgn0032089	-2.54613	0.451278	97.9453	8.27626e-06	0.00697344	CG9573	Rcd-1r	Rcd-1 related	Induced by Spiroplasma presence	1.59821	2.4341	2.21014	2.55238	0.322948	0.472863	0.424754	0.280674
FBgn0031296	-4.49924	1.6119	92.5608	1.02431e-05	0.00756187	CG4415	CG4415		Induced by Spiroplasma presence	3.69956	6.20195	7.00573	5.71247	0.484422	0.157621	0.0707923	0.32077
FBgn0013813	-3.17654	-0.00156074	92.0223	1.04704e-05	0.00756187	CG1842	Dhc98D	Dynein heavy chain at 89D	Induced by Spiroplasma presence	1.18386	1.53382	1.45953	2.47135	0.201843	0.157621	0.212377	0.160385
FBgn0029754	-3.44243	-0.00282006	81.5783	1.64387e-05	0.0100101	CG15930	CG15930		Induced by Spiroplasma presence	1.15426	1.63385	1.54293	2.43084	0.0807371	0.189145	0.212377	0.120289
FBgn0039129	-3.14019	0.768516	62.3682	4.41953e-05	0.0165503	CG5338	RpS19b	Ribosomal protein S19b	Induced by Spiroplasma presence	1.7166	3.30104	3.37776	3.24112	0.444054	0.472863	0.283169	0.120289
FBgn0000146	-2.0618	1.52204	56.0649	6.49665e-05	0.0218959	CG6137	aub	aubergine	Induced by Spiroplasma presence	2.5749	5.30167	4.87899	5.10476	0.968845	1.1664	1.23887	0.96231
FBgn0035608	-4.52994	1.94897	46.322	0.000166215	0.0357574	CG10630	blanks	blanks	Induced by Spiroplasma presence	1.50942	8.80277	8.34015	9.8449	0.322948	0.189145	0.424754	0.32077

## Sheet: FC Comparisons
Fold change differences of the DE genes corresponding to Time point 1 (24 hours post wasp attack). The 2Log FC for DE genes that were shared in at least one pair of comparison is showed.NA refers that this particular gene was not DE in that comparison, because gene did not pass the CPM > 1 filter or FDR was no significant
Gene id	Gene symbol	Gene name	2Log FC in comparison
			S–W– vs. S+W–	S–Lh vs. S+Lh	S–Gh vs. S+Gh	S–W– vs. S–Lh
FBgn0013813	Dhc98D	Dynein heavy chain at 89D	-2.6116	-2.77807	-3.17654	NA
FBgn0019660	lncRNA:roX2	long non-coding RNA on the X	-7.35336	-8.87504	-9.56071	NA
FBgn0019661	lncRNA:roX1	long non-coding RNA on the X	-1.95659	-2.44393	-2.57417	NA
FBgn0028852	CG15262		-5.74131	-8.23937	NA	NA
FBgn0029754	CG15930		-2.86112	-3.7215	-3.44243	NA
FBgn0030647	CG6324		-7.01974	-5.01462	-5.72604	NA
FBgn0030667	CG15599		-5.93767	-5.29601	-6.22714	NA
FBgn0031296	CG4415		-4.44281	-5.51646	-4.49924	NA
FBgn0034837	RpL22-like	Ribosomal protein L22-like	-6.20005	-6.32179	-7.65441	NA
FBgn0034998	CG13577		-5.6446	-5.1051	NA	NA
FBgn0035571	CG12493		-4.25459	-3.66346		NA
FBgn0035608	blanks	blanks	-4.30991	-5.11915	-4.52994	NA
FBgn0036224	Rpt4R	Regulatory particle triple-A ATPase 4-related	-5.98268	-8.63189	NA	NA
FBgn0036809	CG12477		-6.95197	-6.53935	-7.89948	NA
FBgn0038191	CG9925		-2.95116	-2.68656	-2.81888	NA
FBgn0038277	RpS5b	Ribosomal protein S5b	-2.32775	-2.81741	-2.62237	NA
FBgn0039129	RpS19b	Ribosomal protein S19b	-2.79437	-3.24164	-3.14019	NA
FBgn0052259	CG32259		-4.50899	-4.11787	NA	NA
FBgn0262104	CG42857		-4.92996	-6.95706	NA	NA
FBgn0005616	msl-2	male-specific lethal 2	-1.12615	NA	-1.21208	NA
FBgn0032089	Rcd-1r	Rcd-1 related	-2.36889	NA	-2.54613	NA
FBgn0000146	aub	aubergine	-2.14018	NA	-2.0618	NA
FBgn0013672	mt:ATPase6	mitochondrial ATPase subunit 6	-2.32058	NA	NA	-2.25908

## Sheet: Schlenke FC
Fold-change and cpm values for the 37 genes reported by Schlenke et al. 2007 as differentially expressed (p< 0.01)* for the treatment comparison: S0W0 vs. S0Lh at ~24 h post-wasp attack.
* Gene expression values were retrived from supplementary table S3 of Schlenke et al. 2007. **No significant FDR > 0.05
				Schlenke et al 2007*		This study	cpm values in this study
Gene_id	Secondary_identifier	Gene_symbol	Gene_name	Gene_id	Fold-change	Fold-change**	cpm S0W0	cpm S0W0	cpm S0W0	cpm S0W0	cpm S0Lh	cpm S0Lh	cpm S0Lh	cpm S0Lh
FBgn0259176	CG42281	bun	bunched	CG5461	0.67	1.16554	174.982	195.882	145.286	151.295	169.775	197.589	187.27	212.255
FBgn0250746	CG12000	Prosbeta7	Proteasome beta7 subunit	CG12000	1.14	0.935326	127.379	130.149	103.566	103.719	119.532	109.919	95.1616	105.104
FBgn0250732	CG33546	gfzf	GST-containing FLYWCH zinc-finger protein	CG31492	1.22	0.993701	89.1379	89.043	73.0567	89.1083	68.5498	99.0405	82.0564	84.106
FBgn0052374	CG32374	CG32374		CG32374	1.15	2.33847	2.7043	2.13051	0.188097	0.667478	6.59417	2.55053	1.26584	2.69109
FBgn0051269	CG31269	CG31269		CG31269	1.35	1.00376	19.4848	15.1016	17.3801	21.0997	16.0917	21.6642	18.2058	16.6772
FBgn0051266	CG31266	CG31266		CG31266	1.32	0.949053	85.1854	77.6384	73.922	71.0493	76.2759	76.9769	73.3444	62.1603
FBgn0041183	CG18096	Tep1	Thioester-containing protein 1	CG18096	0.5	0.720525	10.0891	10.7779	9.51769	12.3113	7.38153	10.8782	7.29721	4.85154
FBgn0041180	CG10363	Tep4	Thioester-containing protein 4	CG10363	0.73	0.799436	390.841	368.328	289.895	299.735	302.987	284.922	229.825	247.959
FBgn0040250	CG15902	Ugt304A1	UDP-glycosyltransferase family 304 member A1	CG15902	1.24	1.17035	10.7825	7.64479	7.56148	7.2681	10.2357	9.43389	10.1267	8.6797
FBgn0038484	CG5246	CG5246		CG5246	1.67	1.87932	66.4634	50.1924	32.1645	68.8986	60.9715	129.801	119.324	91.9897
FBgn0038479	CG17477	CG17477		CG17477	1.27	1.08085	5.09656	2.94512	5.26671	7.82433	4.52734	5.90002	5.80799	6.55716
FBgn0036820	CG6852	Grx1	Glutaredoxin 1	CG6852	1.21	1.08216	77.6966	56.9599	84.5306	87.6992	70.4198	90.0368	87.4921	81.377
FBgn0036211	CG5946	CG5946		CG5946	1.15	1.01728	213.016	186.107	174.366	184.446	182.619	206.224	183.026	190.082
FBgn0034440	CG10073	CG10073		CG10073	0.48	0.731059	94.0264	89.7949	18.5839	40.6049	111.018	21.2032	23.2319	20.619
FBgn0032596	CG17331	Prosbeta4	Proteasome beta4 subunit	CG17331	1.15	0.883775	103.873	84.7193	81.032	82.0627	80.754	79.8347	72.1903	74.5166
FBgn0032049	CG13095	Bace	beta-site APP-cleaving enzyme	CG13095	0.61	2.82014	11.5106	11.9058	41.0051	44.684	12.5486	74.1805	139.354	79.5197
FBgn0031830	CG11015	COX5B	Cytochrome c oxidase subunit 5B	CG11015	1.1	1.04816	446.487	404.86	526.181	508.396	426.997	531.371	512.815	487.959
FBgn0030718	CG9172	ND-20	NADH dehydrogenase (ubiquinone) 20 kDa subunit	CG9172	1.08	1.05552	162.431	153.71	174.403	190.231	158.555	186.066	188.685	178.256
FBgn0028663	CG7625	VhaM9.7-b	Vacuolar H[+] ATPase M9.7 subunit b	CG7625	1.08	1.08631	238.81	199.767	306.071	289.092	232.568	284.615	315.753	280.707
FBgn0028517	CG18478	CG18478		CG18478	0.81	NA	0	0	0	0	0	0	0	0
FBgn0028430	CG31770	He	Hemese	CG31770	0.77	0.652017	8.84098	8.39673	10.6086	11.0134	6.05286	6.36096	6.66429	6.06442
FBgn0026313	CG5675	X11L	X11L	CG5675	0.8	0.983389	38.7963	42.485	36.0017	35.7472	39.1713	36.1376	35.5925	37.8647
FBgn0024293	CG1865	Spn43Ab	Serpin 43Ab	CG1865	1.19	1.32252	54.294	51.6963	68.9186	64.4858	67.7625	84.3826	87.8272	73.7964
FBgn0023175	CG1519	Prosalpha7	Proteasome alpha7 subunit	CG1519	1.13	0.883211	117.88	120.562	92.6188	88.5892	97.6331	94.6769	82.6893	90.8905
FBgn0019624	CG14724	COX5A	Cytochrome c oxidase subunit 5A	CG14724	1.14	1.10916	514.649	516.587	608.681	595.91	536.638	646.944	682.699	588.817
FBgn0017567	CG3944	ND-23	NADH dehydrogenase (ubiquinone) 23 kDa subunit	CG3944	1.07	1.01701	147.974	148.321	150.665	151.888	146.204	154.876	152.311	149.336
FBgn0015778	CG9412	rin	rasputin	CG9412	0.72	0.897206	203.135	202.274	179.294	161.53	189.902	137.575	150.635	184.207
FBgn0014033	CG4099	Sr-CI	Scavenger receptor class C, type I	CG4099	0.56	0.45102	22.1545	22.0571	24.9416	29.2207	13.3852	10.325	10.4991	9.93049
FBgn0010590	CG8392	Prosbeta1	Proteasome beta1 subunit	CG8392	1.16	0.975925	91.0794	88.4163	73.7715	77.3904	76.5711	88.316	74.9826	78.7617
FBgn0010425	CG18681	epsilonTry	epsilonTrypsin	CG18681	1.09	1.12656	1501.89	1334.52	1127.34	1285.19	1686.58	1475.87	1401.29	1283.61
FBgn0005624	CG3886	Psc	Posterior sex combs	CG3886	0.93	1.13763	6.20602	9.46199	7.63672	7.15685	9.05468	6.91409	8.00459	10.2716
FBgn0004509	CG10772	Fur1	Furin 1	CG10772	0.83	1.21518	75.5817	84.0927	65.1567	84.6214	87.5942	97.0431	85.1838	101.92
FBgn0004395	CG4620	unk	unkempt	CG4620	0.75	1.07613	35.5026	32.1457	29.1174	26.9958	36.4156	28.8548	33.3215	33.0132
FBgn0003462	CG11793	Sod1	Superoxide dismutase 1	CG11793	1.09	1.15979	207.746	190.994	255.548	240.96	213.523	275.857	286.639	252.545
FBgn0003028	CG6824	ovo	ovo	CG6824	0.82	1.26502	22.1198	25.6288	15.3863	13.3125	26.6719	20.8345	21.8172	25.8117
FBgn0000635	CG3665	Fas2	Fasciclin 2	CG3665	0.83	1.04885	79.1874	82.7767	76.1039	77.4646	86.9053	73.2279	84.2902	82.931
FBgn0000108	CG7727	Appl	beta amyloid protein precursor-like	CG7727	0.65	1.03487	35.6413	40.7931	24.8288	26.4396	32.774	27.8715	28.9282	40.5558
