# Supplementary material for: Differential gene expression in a tripartite interaction: Drosophila, Spiroplasma and parasitic wasps
Source: PeerJ. 2021 Mar 4;9:e11020. doi: 10.7717/peerj.11020 (PMC7937342; doi:10.7717/peerj.11020)
Supplement: Supplemental Information 5 — List of genes differentially expressed (DE) among different pairwise treatment comparisons. GO enriched categories. All data correspond to time point 2. [file peerj-09-11020-s005.xlsx]

## Sheet: Organization of datasets
Content description of Dataset S5
Inside of this dataset you will find:
1. List of genes differentially expresed (DE) among different comparisons at time point 2 (72 hours post wasp attack). Filtering was done at FDR < 0.05. The cpm for each gene in different replicates is reported. The name of the comparison is specified in the the different sheets. For example, in sheet "DE: S–W– vs. S+W–", we report the DE genes for that comparison.
2. List of Gene Ontology (GO) enrichments for the DE genes in each comparison, includes pathway and protein domain enrichments. For example, in sheet "GO: S–W– vs. S+W–", we report enrichments of the DE genes from S0W0 vs. S+W0 comparison. If there is no sheet for a particular comparison, it means that there was no GO enrichment for these genes.
3. Sheet labeled "FC: Comparisons": Log2 fold changes values corresponding to DE genes that are shared between at least two different comparisons at time point 2 (72 hours post wasp attack).
Abbreviations	Meaning
S–	No Spiroplasma
W–	No Wasp parasitism
S+	Spiroplasma infection
Lh	L. heterotoma parasitism
Gh	Ganaspis sp. parasitism
S–W–	No Spiroplasma-No wasp
S+W–	Spiroplasma-No wasp
S–Lh	No Spiroplasma-L. heterotoma
S–Gh	No Spiroplasma-Ganaspis sp.
S+Lh	Spiroplasma-L. heterotoma
S+Gh	Spiroplasma-Ganaspis sp.
Comparison	Number of genes after filtering (CPM > 1)
S–W– vs. S+W–	11342
S–W– vs. S–Lh	11342
S–W– vs. S–Gh	11617
S–Lh vs. S+Lh	10553
S–Gh vs. S+Gh	11336
Total number of genes in our D. melanogaster reference: 17560

## Sheet: DE S–W– vs. S+W–
Diferentially upregulated genes in S–W– vs. S+W– comparison. Time 2, 72 hours post wasp attack, log2FC is reported in tables.
Gene_id	log2FC	logCPM	F	PValue	FDR	Secondary_identifier	Gene_symbol	Gene_name	cpm (S–W–_1)	cpm (S–W–_2)	cpm (S–W–_3)	cpm (S–W–_4)	cpm (S+W–_1)	cpm (S+W–_2)	cpm (S+W–_3)	cpm (S+W–_4)
FBgn0011935	0.896886	1.88086	23.927	0.00124333	0.0100727	CR30519	tRNA:Asn-GTT-1-7	transfer RNA:Asparagine-GTT 1-7	2.7289	3.50093	2.87418	2.28641	2.9548	3.36047	5.02441	5.71694
FBgn0038790	1.16157	0.887331	22.1483	0.00157277	0.0125888	CG5097	MtnC	Metallothionein C	1.09914	1.16698	1.1619	1.47347	2.58926	1.9708	1.96607	1.871
FBgn0053511	1.1597	1.7219	20.3929	0.00201292	0.0159654	CG33511	CG33511		1.78137	2.3923	2.14034	2.64208	4.84343	3.61313	3.05834	3.79397
FBgn0053459	0.992022	4.35606	20.3029	0.00206804	0.016334	CG33459	CG33459		14.592	11.4947	15.227	20.0696	22.6027	24.635	25.0492	22.4
FBgn0000640	0.7814	13.4105	19.8014	0.0021951	0.0172774	CG3763	Fbp2	Fat body protein 2	10819.5	9535.3	7801	8140.28	10794.6	11656	12462.7	13808.3
FBgn0064237	0.671611	5.29711	17.3627	0.00320786	0.0247171	CG5154	Idgf5	Imaginal disc growth factor 5	30.8138	29.6412	37.9758	37.9036	41.7632	40.7804	43.3993	43.2408
FBgn0039053	1.55744	1.18912	17.2597	0.00330235	0.025359	CG6738	CG6738		1.25075	1.10863	0.794985	1.82913	3.04618	3.30993	2.98552	1.76705
FBgn0022029	1.19108	6.41732	16.5376	0.00374471	0.0285433	CG4798	l(2)k01209	lethal (2) k01209	32.1783	77.7789	47.5156	77.2299	88.583	100.662	102.382	130.71
FBgn0000109	0.667585	4.06232	16.3201	0.00382328	0.0290641	CG18315	Aprt	Adenine phosphoribosyltransferase	15.5775	14.7039	13.7594	14.0233	18.3685	18.6468	16.4568	17.3587
FBgn0027106	0.58649	4.89365	16.262	0.0038562	0.0292751	CG2977	Inx7	Innexin 7	26.152	27.9491	26.418	26.5732	34.8483	27.9449	27.3794	34.8214
FBgn0030607	1.03319	3.22135	16.125	0.00400122	0.0302747	CG5560	dob	doppelganger von brummer	6.63275	7.1769	7.09371	6.50357	12.8854	12.0017	7.79148	9.66682
FBgn0051133	0.640473	2.73255	15.1448	0.00469198	0.035196	CG31133	Slimp	Seryl-tRNA synthetase-like insect mitochondrial protein	5.3062	5.89323	6.05411	5.89386	7.73731	6.5188	6.48076	7.17216
FBgn0031945	0.750485	2.45667	14.4653	0.00531321	0.0396725	CG7191	CG7191		3.22162	5.60148	4.76991	4.62363	5.63544	5.58393	6.6264	6.02877
FBgn0040503	1.66678	4.42972	14.3113	0.00558833	0.0416171	CG7763	CG7763		10.7261	7.93544	14.5543	13.0071	32.3809	39.9719	20.5346	15.0719
FBgn0262588	0.867332	2.94441	14.1078	0.00572834	0.0424924	CG43125	CG43125		5.3062	5.25139	6.23757	7.46894	10.0219	8.46433	7.20894	8.31555
FBgn0030073	1.06589	6.58993	13.5773	0.00636247	0.0467378	CG10962	CG10962		68.4499	76.2035	74.8509	61.8855	136.896	129.34	72.235	105.867
Diferentially downregulated genes in S–W– vs. S+W– comparison. Time 2, 72 hours post wasp attack, log2FC is reported in tables.
Gene_id	log2FC	logCPM	F	PValue	FDR	Secondary_identifier	Gene_symbol	Gene_name	cpm (S–W–_1)	cpm (S–W–_2)	cpm (S–W–_3)	cpm (S–W–_4)	cpm (S+W–_1)	cpm (S+W–_2)	cpm (S+W–_3)	cpm (S+W–_4)	tissue enrichment
FBgn0000147	-0.760806	2.89669	24.5335	0.00115113	0.00934583	CG3068	aurA	aurora A	11.2188	9.10241	10.5794	10.8732	4.99574	4.29533	4.1506	5.82088	Testis
FBgn0000274	-5.86428	0.678284	423.582	3.70079e-08	9.34652e-06	CG12066	Pka-C2	Protein kinase, cAMP-dependent, catalytic subunit 2	3.71434	3.44258	2.50726	3.70907	0.0304618	0.0252667	0.0728176	0.0519722	Testis
FBgn0000346	-1.08435	3.14431	45.9946	0.000147287	0.00132371	CG1618	comt	comatose	13.6445	12.3116	12.2305	15.4968	5.20897	4.0932	4.22342	6.39258	Testis
FBgn0000615	-3.29657	6.15521	489.161	2.11167e-08	7.91206e-06	CG8994	exu	exuperantia	155.661	126.383	141.14	159.947	11.0881	10.7383	12.0877	12.4733	Testis
FBgn0001216	-3.4344	0.522421	89.7949	1.37382e-05	0.000158675	CG8937	Hsc70-1	Heat shock protein cognate 1	3.14582	2.2756	2.56841	3.09936	0.121847	0.252667	0.29127	0.103944	Testis
FBgn0001217	-4.35919	3.07191	733.504	4.32829e-09	6.16818e-06	CG7756	Hsc70-2	Heat shock protein cognate 2	18.458	15.8709	16.9393	20.2728	0.548313	0.5306	0.728176	0.987471	Testis
FBgn0001281	-6.29375	1.75979	375.592	5.9075e-08	1.01803e-05	CG7931	janB	janus B	7.35287	6.94351	7.46063	7.62137	0.0304618	0.101067	0.0728176	0.0519722	Testis
FBgn0001313	-9.55226	1.12753	625.215	2.255e-06	4.67561e-05	CG17866	kl-2	male fertility factor kl2	4.24496	5.13469	4.28069	5.23334	0	0	0	0	Testis
FBgn0002715	-0.658877	2.73273	23.7806	0.00126694	0.0102567	CG5303	mei-S332	meiotic from via Salaria 332	9.85437	7.93544	8.43907	10.0094	4.44743	3.8658	4.66032	5.0413	Testis
FBgn0002842	-5.98851	1.01624	101.355	9.23467e-06	0.00011447	CG11308	sa	spermatocyte arrest	5.60941	2.68404	4.46415	4.36959	0.0913855	0.0505333	0	0	Testis
FBgn0002862	-2.18172	4.06557	45.608	0.00016006	0.0014317	CG17956	Mst87F	Male-specific RNA 87F	34.3387	29.6412	21.3423	38.056	4.72158	5.58393	2.83989	8.05569	Testis
FBgn0002865	-8.78216	3.10634	334.715	1.05387e-07	1.2812e-05	CG11719	Mst98Ca	Male-specific RNA 98Ca	24.6359	16.396	16.817	19.0026	0.0609237	0.0252667	0	0	Testis
FBgn0002873	-0.727808	5.79604	22.6657	0.00146669	0.0117813	CG12047	mud	mushroom body defect	71.103	79.4127	86.103	75.7056	28.6341	26.4795	50.7539	46.3592	Testis
FBgn0003009	-4.57537	0.778259	167.103	1.33189e-06	3.3795e-05	CG3134	ord	orientation disruptor	4.01755	3.38423	3.66916	2.99774	0.0304618	0.101067	0.145635	0.207889	Testis
FBgn0003132	-5.94907	1.95508	262.951	2.41487e-07	1.53014e-05	CG9156	Pp1-13C	Protein phosphatase 1 at 13C	9.05844	7.76039	7.82754	8.94241	0.0304618	0.101067	0.218453	0.103944	Testis
FBgn0003140	-8.02359	-0.29054	211.226	3.14788e-05	0.000319922	CG10930	PpY-55A	Protein phosphatase Y at 55A	2.16038	1.80881	1.34536	1.21942	0	0	0	0	Testis
FBgn0003187	-0.902678	3.14391	47.2474	0.000134279	0.00121258	CG6433	qua	quail	14.8953	12.0199	12.8421	11.7877	4.87389	4.06793	5.3885	7.74385	Testis
FBgn0003302	-0.649233	2.74441	14.0654	0.00572742	0.0424924	CG4336	rux	roughex	9.62696	10.4444	7.33832	9.14565	3.47265	3.36047	4.87878	7.17216	Testis
FBgn0003527	-5.22577	0.344407	73.3506	2.98539e-05	0.000305323	CG8592	stil	stand still	3.10792	2.10056	2.01804	3.09936	0.0913855	0	0	0.103944	Testis
FBgn0003889	-8.2944	4.91132	290.063	1.82971e-07	1.37868e-05	CG9359	betaTub85D	beta-Tubulin at 85D	71.2926	64.0086	61.703	73.1144	0.0913855	0.0505333	0.145635	0.46775	Testis
FBgn0003950	-1.39335	1.15036	46.4911	0.000141951	0.00127778	CG1501	unc	uncoordinated	3.18372	2.74239	3.91377	4.06473	0.944317	0.884333	0.946629	1.40325	Testis
FBgn0004171	-7.66087	2.37495	168.461	1.43531e-06	3.54548e-05	CG18396	Mst98Cb	Male-specific RNA 98Cb	14.0614	10.2694	10.7629	10.7207	0	0.0758	0.0728176	0	Testis
FBgn0004172	-11.3358	2.86824	1213.11	4.45469e-07	2.02724e-05	CG17946	Mst84Da	Male-specific RNA 84Da	17.4726	14.7039	14.3709	18.4945	0	0	0	0	Testis
FBgn0004173	-10.9119	2.4512	562.666	3.05733e-06	5.61103e-05	CG17934	Mst84Db	Male-specific RNA 84Db	14.2509	11.6114	8.50022	14.1758	0	0	0	0	Testis
FBgn0004174	-11.1065	2.64207	699.941	1.76443e-06	4.0067e-05	CG17945	Mst84Dc	Male-specific RNA 84Dc	14.0235	12.1365	11.619	17.6308	0	0	0	0	Testis
FBgn0004175	-10.9822	2.51923	1488.09	2.69986e-07	1.59559e-05	CG17935	Mst84Dd	Male-specific RNA 84Dd	12.1664	12.3116	13.209	13.2104	0	0	0	0	Testis
FBgn0004372	-9.46653	1.04663	248.896	2.22456e-05	0.000233837	CG2075	aly	always early	4.43447	3.09249	4.03608	6.14791	0	0	0	0	Testis
FBgn0004581	-3.30304	1.33768	177.521	1.0583e-06	3.0008e-05	CG30170	bgcn	benign gonial cell neoplasm	4.51027	4.7846	4.6476	5.99548	0.274157	0.379	0.582541	0.363805	Testis
FBgn0005778	-8.9028	0.512142	577.967	2.73194e-06	5.18156e-05	CG10138	PpD5	Protein phosphatase D5	2.99421	3.15083	2.69072	3.20098	0	0	0	0	Testis
FBgn0010258	-4.81777	2.44479	103.704	8.69945e-06	0.000110368	CG9654	Rbp4	RNA-binding protein 4	13.5308	8.63562	10.4571	13.9217	0.182771	0.126333	0.29127	0.831555	Testis
FBgn0011206	-1.33283	4.10247	25.1011	0.00111119	0.00903446	CG4760	bol	boule	27.8954	23.6313	28.6195	30.1806	9.16901	8.38853	10.5585	5.40511	Testis
FBgn0011239	-6.70327	-0.0547644	133.835	3.14866e-06	5.67576e-05	CG31733	ms(2)35Ci	male sterile (2) 35Ci	1.85717	1.45872	1.71227	2.74369	0	0.0252667	0	0	Testis
FBgn0011244	-7.61292	2.65369	208.579	6.41354e-07	2.34653e-05	CG2830	Hsp60B	Heat shock protein 60B	16.0702	15.4624	11.2521	13.0579	0	0.0252667	0.0728176	0.155917	Testis
FBgn0011569	-3.77035	1.75279	120.381	4.73276e-06	7.3132e-05	CG6577	can	cannonball	7.58028	5.71818	6.66564	7.51975	0.304618	0.1516	0.655358	0.623666	Testis
FBgn0011743	-9.41535	2.55049	361.997	7.27511e-08	1.08571e-05	CG5409	Arp53D	Actin-related protein 53D	12.318	12.4866	13.3924	13.7693	0	0	0	0.0519722	Testis
FBgn0013300	-7.80635	0.991626	216.654	5.07417e-07	2.13212e-05	CG4479	ProtA	Protamine A	4.96508	3.85102	3.79147	4.4204	0	0	0	0.0519722	Testis
FBgn0013301	-10.5562	2.10189	1169.8	4.8697e-07	2.08044e-05	CG4478	ProtB	Protamine B	10.6124	9.86095	8.50022	8.99322	0	0	0	0	Testis
FBgn0013810	-4.12333	2.46718	193.859	7.86342e-07	2.63088e-05	CG5526	Dhc36C	Dynein heavy chain at 36C	9.77856	12.1949	13.0867	11.3812	0.456928	0.252667	0.509723	0.987471	Testis
FBgn0013811	-1.92778	2.65416	182.333	9.558e-07	2.86034e-05	CG15804	Dhc62B	Dynein heavy chain at 62B	9.70276	11.0863	12.1694	11.3812	2.04094	1.7434	2.9127	2.59861	Testis
FBgn0013813	-6.89385	3.79969	424.763	4.05983e-08	9.54885e-06	CG1842	Dhc98D	Dynein heavy chain at 89D	27.289	31.9751	32.9001	31.7049	0.243695	0.0758	0.145635	0.363805	Testis
FBgn0014342	-0.715785	1.90026	26.8383	0.00087025	0.00718891	CG10390	mia	meiosis I arrest	4.73768	5.018	5.25913	5.43658	2.40649	1.99607	2.40298	3.01439	Testis
FBgn0015008	-4.96249	1.74142	54.1797	8.86199e-05	0.000811241	CG8953	Actn3	alpha actinin 3	8.37621	5.83488	6.54334	7.57056	0.0304618	0.0252667	0.364088	0.46775	Testis
FBgn0015300	-9.06076	0.662216	257.21	1.97236e-05	0.000211242	CG13591	Ssl	Suppressor of Stellate-like	3.94175	2.21725	3.30224	3.9123	0	0	0	0	Testis
FBgn0015544	-0.633035	3.63029	15.8289	0.00415609	0.0313837	CG13570	spag	spaghetti	17.5484	17.0378	19.0796	13.9217	7.55454	5.3818	10.7042	11.6418	Testis
FBgn0015574	-6.91177	0.817	122.03	4.55092e-06	7.10971e-05	CG1108	alpha-Est6	alpha-Esterase-6	4.81348	3.67597	2.44611	4.01392	0	0.0505333	0	0	Testis
FBgn0015721	-0.820529	1.10421	21.8733	0.00163308	0.0130453	CG9398	ktub	king tubby	3.10792	3.32588	2.26265	3.20098	1.34032	1.03593	1.31072	1.61114	Testis
FBgn0015831	-7.22693	1.98911	207.112	6.20106e-07	2.3275e-05	CG1279	Rtnl2	Rtnl2	9.51325	6.82681	7.76639	10.5683	0	0.0252667	0.0728176	0.103944	Testis
FBgn0016034	-2.69619	1.75397	93.4669	1.1779e-05	0.000141075	CG11254	mael	maelstrom	7.08756	5.48479	6.66564	6.45276	1.06616	0.555866	0.509723	0.883527	Testis
FBgn0016974	-7.51917	0.704692	190.962	8.21416e-07	2.68714e-05	CR32747	swaPsi	swallow pseudogene	3.29742	2.97579	2.93533	4.57282	0.0304618	0	0	0	Testis
FBgn0017456	-2.74368	0.871715	29.1335	0.000698137	0.00584806	CG12799	Ubc84D	Ubiquitin conjugating enzyme 84D	3.25952	3.03414	3.54686	3.81069	0.731084	0.1516	0.509723	0.155917	Testis
FBgn0017556	-9.15466	0.749956	639.98	2.13004e-06	4.52414e-05	CG4569	Prosalpha4T2	Proteasome alpha4 subunit, Testis-specific 2	3.82804	3.50093	3.24109	3.75988	0	0	0	0	Testis
FBgn0019828	-8.46795	3.15025	263.581	2.63643e-07	1.59056e-05	CG1980	dj	don juan	20.1636	17.9714	18.5904	22.356	0.0913855	0.0252667	0	0	Testis
FBgn0020280	-9.4322	1.01345	723.923	1.57613e-06	3.76346e-05	CG14660	laf	labial associated factor	4.62397	4.02607	4.40299	4.31878	0	0	0	0	Testis
FBgn0020371	-10.1875	1.74336	526.31	3.43312e-06	5.90872e-05	CG15257	Tim17b2	Translocase inner membrane 17	9.24794	6.47672	5.8095	7.82461	0	0	0	0	Testis
FBgn0020399	-4.83666	0.577834	362.221	6.80052e-08	1.08571e-05	CG6864	Mst89B	Mst89B	4.01755	2.74239	2.81302	2.64208	0.0609237	0.0758	0.0728176	0.103944	Testis
FBgn0023076	-4.5905	1.31163	160.539	1.58415e-06	3.76675e-05	CG7391	Clk	Clock	3.90385	5.77653	5.25913	5.84305	0.0913855	0.202133	0.0728176	0.259861	Testis
FBgn0023090	-3.84113	2.68826	119.283	5.06957e-06	7.59583e-05	CG31623	dtr	defective transmitter release	16.7903	12.8951	12.7809	11.2288	0.274157	0.6064	1.09226	1.14339	Testis
FBgn0025111	-2.17683	2.69	120.767	4.53069e-06	7.08788e-05	CG1683	Ant2	Adenine nucleotide translocase 2	13.4929	9.4525	11.2521	12.8039	1.73632	1.4402	1.96607	3.27425	Testis
FBgn0025387	-4.60535	0.378712	169.797	1.25338e-06	3.2831e-05	CG12184	CG12184		2.42569	2.85909	2.62956	2.59127	0.0304618	0.101067	0.145635	0.0519722	Testis
FBgn0025388	-0.891175	3.44516	33.9344	0.000409329	0.00351979	CG12179	CG12179		15.4638	17.563	15.7162	14.7347	5.20897	4.80066	9.61192	7.95174	Testis
FBgn0025573	-3.70634	0.402603	65.1808	4.45549e-05	0.000434516	CG3245	PpN58A	Protein phosphatase N at 58A	2.99421	2.3923	2.26265	2.59127	0.0913855	0.0505333	0.436905	0.155917	Testis
FBgn0025616	-4.27512	-0.0715606	52.4639	9.6888e-05	0.000883363	CG13359	CG13359		2.16038	1.57542	1.65112	1.98156	0.0304618	0.0252667	0	0.259861	Testis
FBgn0025821	-7.20392	1.58742	169.924	1.31388e-06	3.34877e-05	CG14719	I-t	inhibitor-t	6.40534	5.83488	6.11527	7.72299	0	0.0505333	0.0728176	0	Testis
FBgn0025838	-8.08533	-0.235713	202.231	3.49592e-05	0.000350271	CG2652	CG2652		1.97087	1.57542	1.1619	2.08317	0	0	0	0	Testis
FBgn0026136	-9.38252	0.967728	304.694	1.30514e-05	0.000152451	CG8914	CkIIbeta2	Casein kinase II beta2 subunit	4.96508	3.09249	3.54686	5.13172	0	0	0	0	Testis
FBgn0026141	-10.147	1.70151	448.53	5.06969e-06	7.59583e-05	CG5450	Cdlc2	Cytoplasmic dynein light chain 2	6.25373	5.60148	8.19446	8.38351	0	0	0	0	Testis
FBgn0026174	-8.32502	-0.0191139	318.215	1.16803e-05	0.000140188	CG12700	SkpD	SKP1-related D	2.53939	1.86716	1.65112	1.98156	0	0	0	0	Testis
FBgn0026176	-1.41024	2.20757	25.6013	0.00102221	0.00834696	CG8881	SkpB	SKP1-related B	7.76979	5.018	6.48218	10.3143	2.13233	1.92027	2.83989	1.81903	Testis
FBgn0026257	-0.59993	2.49078	15.4631	0.00443244	0.0333374	CG6219	cav	caravaggio	7.16337	7.0602	7.15486	8.68836	3.89912	2.8046	4.80596	4.26172	Testis
FBgn0026563	-2.07152	3.34537	29.9134	0.000642005	0.00539379	CG1979	CG1979		19.0265	18.3799	17.4285	18.7994	3.74681	4.57326	1.52917	3.01439	Testis
FBgn0027376	-5.87278	2.90611	276.154	2.07979e-07	1.42963e-05	CG11908	rha	rha	15.767	15.3457	17.1839	17.4275	0.243695	0.126333	0.0728176	0.415777	Testis
FBgn0027494	-4.23604	0.616203	66.0854	4.29551e-05	0.000422117	CG12275	RpS10a	Ribosomal protein S10a	3.10792	2.45065	2.87418	3.86149	0.0304618	0.0505333	0.145635	0.363805	Testis
FBgn0027513	-0.634443	1.09222	13.703	0.0061385	0.0452097	CG8262	ana2	anastral spindle 2	3.18372	2.80074	2.81302	2.43884	1.30986	1.3644	1.52917	1.40325	Testis
FBgn0027795	-1.32002	1.25677	45.0443	0.00015822	0.00141637	CG14785	CG14785		3.33532	3.90937	4.21953	3.40421	1.2794	1.01067	0.946629	1.35128	Testis
FBgn0028372	-0.655863	3.11002	16.881	0.00347327	0.0266354	CG11025	isopeptidase-T-3	isopeptidase-T-3	11.7494	14.5872	10.2125	10.8223	5.45267	3.9416	6.11668	8.67935	Testis
FBgn0028379	-5.1108	2.40957	148.551	2.25499e-06	4.67561e-05	CG7919	fan	farinelli	12.318	9.51085	10.5183	13.312	0.0913855	0.176867	0.582541	0.311833	Testis
FBgn0028410	-4.70622	0.19694	47.3089	0.000141302	0.00127295	CG5182	Pk34A	Pk34A	2.50149	1.80881	2.01804	2.74369	0	0.0252667	0.29127	0.0519722	Testis
FBgn0028412	-9.89198	3.01995	434.218	3.62736e-08	9.34652e-06	CG6541	Mst33A	Mst33A	18.6096	17.0962	17.6731	18.9518	0	0	0	0.0519722	Testis
FBgn0028487	-0.601333	4.48589	31.4608	0.000523945	0.00444471	CG9611	f-cup	flyers-cup	30.7759	27.0738	31.7382	31.8065	14.5912	13.4419	17.6947	17.3587	Testis
FBgn0028513	-11.3646	2.89655	855.95	1.05814e-06	3.0008e-05	CG9254	CG9254		16.4871	14.8789	14.1874	20.7301	0	0	0	0	Testis
FBgn0028520	-9.08178	0.681764	527.152	3.41976e-06	5.90872e-05	CG4891	CG4891		3.90385	3.67597	2.81302	3.25179	0	0	0	0	Testis
FBgn0028531	-3.66767	2.00401	135.352	3.04355e-06	5.5948e-05	CG15286	CG15286		8.90683	8.05213	6.91025	8.8916	0.274157	0.429533	0.946629	0.46775	Testis
FBgn0028560	-10.6106	2.15537	1055.88	6.25892e-07	2.3275e-05	CG1380	sut4	sugar transporter 4	11.4462	9.4525	8.74483	9.75536	0	0	0	0	Testis
FBgn0028561	-7.85505	-0.440867	278.826	1.60911e-05	0.000179809	CG17976	sut3	sugar transporter 3	1.70556	1.28367	1.22305	1.57508	0	0	0	0	Testis
FBgn0028567	-10.9883	2.52575	1406.68	3.09917e-07	1.65027e-05	CG1014	robl62A	robl62A	13.7203	12.1949	11.619	13.6168	0	0	0	0	Testis
FBgn0028569	-7.64829	-0.62406	317.984	1.17008e-05	0.000140286	CG15171	robl37BC	robl37BC	1.21285	1.40037	1.10075	1.32104	0	0	0	0	Testis
FBgn0028667	-8.7168	0.336816	226.638	2.67707e-05	0.00027578	CG32090	Vha16-3	Vacuolar H[+] ATPase 16kD subunit 3	2.50149	1.86716	3.4857	2.69288	0	0	0	0	Testis
FBgn0028668	-7.99189	-0.323679	306.102	1.28334e-05	0.0001505	CG32089	Vha16-2	Vacuolar H[+] ATPase 16kD subunit 2	1.55396	1.63377	1.89573	1.32104	0	0	0	0	Testis
FBgn0028669	-10.3986	1.94802	786.776	1.28582e-06	3.30688e-05	CG30329	Vha100-3	Vacuolar H[+] ATPase 100kD subunit 3	9.66486	7.1769	8.011	9.09484	0	0	0	0	Testis
FBgn0028838	-4.4456	-0.0635207	58.7439	6.46662e-05	0.000602665	CG4697	CSN1a	COP9 signalosome subunit 1a	2.38779	1.92551	1.65112	1.47347	0.0304618	0	0.145635	0.155917	Testis
FBgn0028844	-8.39335	0.0411949	286.308	1.50914e-05	0.000170484	CG15283	CG15283		2.31199	1.57542	2.14034	2.38803	0	0	0	0	Testis
FBgn0028847	-10.3275	1.87884	597.726	2.5167e-06	4.93104e-05	CG9014	CG9014		9.09634	6.65176	7.09371	9.4505	0	0	0	0	Testis
FBgn0028848	-6.93884	2.15041	149.2	2.26205e-06	4.67561e-05	CG7311	Gpo3	Glycerophosphate oxidase 3	11.0672	7.4103	10.2736	10.1618	0.0913855	0.0758	0	0	Testis
FBgn0028850	-8.90069	0.510094	306.186	1.28248e-05	0.0001505	CG15260	CG15260		2.7668	2.68404	2.56841	3.96311	0	0	0	0	Testis
FBgn0028852	-9.87534	1.43991	294.742	1.48109e-05	0.000168153	CG15262	CG15262		6.55694	3.79267	5.87066	7.31652	0	0	0	0	Testis
FBgn0028856	-10.0343	1.59241	863.388	1.02439e-06	2.97151e-05	CG18063	CG18063		6.06423	6.59341	6.60449	7.11328	0	0	0	0	Testis
FBgn0028857	-10.0402	1.59967	708.961	1.65868e-06	3.89498e-05	CG12448	CG12448		7.58028	6.24332	5.56489	7.11328	0	0	0	0	Testis
FBgn0028858	-7.27681	0.513993	134.462	3.14701e-06	5.67576e-05	CG10839	CG10839		3.79014	2.21725	2.81302	3.09936	0	0	0.0728176	0	Testis
FBgn0028868	-7.00099	1.35537	105.859	8.06733e-06	0.000105172	CG4701	CG4701		6.82225	5.13469	3.79147	6.35114	0	0.0758	0	0	Testis
FBgn0028870	-8.24717	3.01919	159.859	1.74725e-06	4.0067e-05	CG4691	CG4691		22.5513	16.6878	14.7989	18.1389	0	0	0.145635	0.103944	Testis
FBgn0028884	-7.03961	0.252058	217.189	4.89753e-07	2.08044e-05	CG4892	CG4892		2.691	2.2756	2.50726	2.38803	0	0.0252667	0	0	Testis
FBgn0028887	-8.93855	3.31786	232.601	4.24234e-07	1.97344e-05	CG3491	CG3491		23.9537	18.8467	23.9718	22.1528	0	0.0252667	0.145635	0	Testis
FBgn0028892	-6.8796	0.811548	188.451	8.63849e-07	2.7401e-05	CG4161	CG4161		4.69977	3.20918	2.93533	4.01392	0.0304618	0	0	0.0519722	Testis
FBgn0028893	-9.85293	1.41736	525.256	3.44995e-06	5.92126e-05	CG31819	CG31819		5.95052	4.55121	6.35988	6.35114	0	0	0	0	Testis
FBgn0028896	-4.16414	0.403274	280.352	1.83401e-07	1.37868e-05	CG17329	CG17329		2.8047	3.09249	1.89573	2.74369	0.0913855	0.0758	0.145635	0.155917	Testis
FBgn0028900	-9.02134	0.622449	521.64	3.50858e-06	5.96616e-05	CG18518	CG18518		3.10792	2.97579	3.66916	3.30259	0	0	0	0	Testis
FBgn0028901	-11.4395	2.97065	1408.38	3.09e-07	1.65027e-05	CG18109	CG18109		19.595	15.7542	15.7774	18.7994	0	0	0	0	Testis
FBgn0028902	-9.83662	1.40179	949.631	8.11464e-07	2.68714e-05	CG4767	Tektin-A	Tektin A	6.02632	5.83488	5.62605	5.5382	0	0	0	0	Testis
FBgn0028903	-9.57874	1.15383	796.397	1.24816e-06	3.2831e-05	CG13243	CG13243		5.23039	5.018	4.6476	4.36959	0	0	0	0	Testis
FBgn0028913	-8.21862	-0.115631	156.151	6.71879e-05	0.000624628	CG3473	CG3473		2.27408	1.16698	1.65112	2.33722	0	0	0	0	Testis
FBgn0028935	-8.30261	-0.0425223	470.88	4.50326e-06	7.06445e-05	CG7653	CG7653		1.97087	2.04221	1.83458	2.08317	0	0	0	0	Testis
FBgn0028941	-8.60133	0.233654	403.12	6.57421e-06	9.09396e-05	CG16853	CG16853		2.95631	2.3923	2.01804	2.38803	0	0	0	0	Testis
FBgn0028942	-6.72388	0.637893	131.975	3.3747e-06	5.85257e-05	CG16852	CG16852		3.60063	2.68404	3.66916	3.15017	0	0.0505333	0	0	Testis
FBgn0028943	-3.0135	0.491693	31.8779	0.000523173	0.00444149	CG15638	CG15638		2.31199	3.15083	1.89573	3.15017	0.0609237	0.126333	0.655358	0.363805	Testis
FBgn0028997	-1.46795	2.6496	54.6164	8.11208e-05	0.000746206	CG8362	nmdyn-D7	nmdyn-D7	10.8777	8.69397	9.96789	11.4321	2.61972	1.79393	2.98552	4.6775	Testis
FBgn0029501	-10.12	1.67689	712.508	1.63857e-06	3.85573e-05	CG13580	Crtp	Caldesmon-related protein	7.69399	6.30167	6.11527	7.87542	0	0	0	0	Testis
FBgn0029589	-4.3376	-0.401858	66.3622	4.17629e-05	0.000411075	CG14810	CG14810		1.59186	1.28367	1.46766	1.37185	0	0.0252667	0.0728176	0.155917	Testis
FBgn0029603	-2.87276	0.171748	74.0278	2.74536e-05	0.000282127	CG14053	CG14053		2.16038	1.92551	2.56841	1.57508	0.152309	0.101067	0.29127	0.415777	Testis
FBgn0029656	-7.2741	0.491941	149.913	2.08572e-06	4.48035e-05	CG10793	CG10793		4.05545	2.15891	2.62956	2.89612	0	0	0	0.0519722	Testis
FBgn0029658	-5.20713	0.131805	48.9308	0.000125919	0.00113798	CG14269	CG14269		1.89507	2.6257	1.52882	2.74369	0.0304618	0	0.218453	0	Testis
FBgn0029659	-5.84618	1.96068	684.13	5.68764e-09	6.16818e-06	CG16782	CG16782		8.41411	7.93544	8.62253	8.73917	0.0609237	0.101067	0.145635	0.155917	Testis
FBgn0029661	-4.68789	0.954282	61.5623	5.67303e-05	0.000535749	CG16781	CG16781		3.79014	3.55928	4.21953	4.4712	0	0.202133	0.145635	0.103944	Testis
FBgn0029667	-4.759	-0.116	63.1149	5.0232e-05	0.000482006	CG14271	Gas8	Growth arrest specific protein 8	2.04668	1.34202	1.77343	2.08317	0.0304618	0.101067	0	0	Testis
FBgn0029700	-5.7481	0.191738	140.728	2.59525e-06	5.03168e-05	CG15576	CG15576		2.16038	2.2756	2.26265	2.64208	0.0609237	0.0252667	0	0	Testis
FBgn0029701	-1.65192	0.282276	23.7077	0.00128789	0.0104189	CG12691	CG12691		1.55396	2.56735	1.77343	1.87994	0.609237	0.252667	0.29127	0.779583	Testis
FBgn0029702	-6.9178	1.3176	159.469	1.6698e-06	3.91298e-05	CG15572	CG15572		5.91262	4.55121	5.99296	5.0301	0.0304618	0	0	0.103944	Testis
FBgn0029703	-7.79731	1.68777	270.648	2.18784e-07	1.47705e-05	CG12692	CG12692		8.22461	6.00993	6.29873	7.57056	0.0304618	0	0	0.0519722	Testis
FBgn0029705	-8.04769	1.24247	194.258	7.84899e-07	2.63088e-05	CG12693	CG12693		5.4957	4.6679	5.07567	5.18253	0	0	0.0728176	0	Testis
FBgn0029710	-1.78962	1.54763	58.8868	6.22292e-05	0.000583171	CG3568	CG3568		6.40534	4.72625	4.46415	4.26797	1.0357	0.656933	1.16508	1.81903	Testis
FBgn0029717	-9.30621	0.891387	321.188	1.14196e-05	0.000137451	CG12684	CG12684		3.07001	3.55928	4.21953	5.0301	0	0	0	0	Testis
FBgn0029722	-5.67036	1.35201	564.725	1.20493e-08	6.94916e-06	CG7024	CG7024		6.36744	4.49286	4.95337	5.94467	0.0609237	0.0758	0.0728176	0.103944	Testis
FBgn0029724	-6.86001	0.0906198	162.637	1.48463e-06	3.6101e-05	CG15472	CG15472		2.99421	1.80881	1.95689	1.93075	0	0.0252667	0	0	Testis
FBgn0029725	-9.63887	1.21202	650.673	2.04554e-06	4.41915e-05	CG2871	CG2871		5.60941	4.37616	4.76991	5.28415	0	0	0	0	Testis
FBgn0029728	-7.02874	3.90616	252.797	3.09112e-07	1.65027e-05	CG2861	CG2861		32.1404	31.6834	36.3858	33.2292	0.0913855	0.0758	0.218453	0.519722	Testis
FBgn0029730	-4.72485	1.27372	57.8819	7.04083e-05	0.000651895	CG12681	boil	boilerman	5.95052	4.31781	4.46415	5.43658	0	0.101067	0.218453	0.363805	Testis
FBgn0029745	-1.30092	0.911908	23.3906	0.00133269	0.010743	CG6789	Rpn13R	Regulatory particle non-ATPase 13-related	2.88051	2.85909	3.11879	2.64208	0.609237	0.505333	1.45635	1.35128	Testis
FBgn0029747	-8.79355	0.407914	433.203	5.5177e-06	8.05427e-05	CG5062	CG5062		2.38779	2.74239	3.17994	2.84531	0	0	0	0	Testis
FBgn0029750	-4.04254	2.58315	550.739	1.32902e-08	6.94916e-06	CG3323	CG3323		12.4317	12.4283	13.2701	12.0926	0.487389	0.429533	0.873811	0.675638	Testis
FBgn0029751	-1.53494	0.0364839	21.2539	0.00178299	0.0141913	CG17764	CG17764		1.36445	1.34202	1.77343	1.77832	0.213233	0.3032	0.800993	0.519722	Testis
FBgn0029752	-8.81989	3.5639	311.477	1.39354e-07	1.31872e-05	CG3315	TrxT	Thioredoxin T	25.1286	24.0397	24.033	32.3146	0	0.0252667	0.145635	0.0519722	Testis
FBgn0029753	-10.4421	1.99038	629.786	2.21524e-06	4.64422e-05	CG4198	CG4198		9.62696	6.76846	8.74483	9.80616	0	0	0	0	Testis
FBgn0029812	-8.49652	0.133285	309.414	1.25028e-05	0.000147548	CG18341	Prosbeta2R1	Proteasome beta2 subunit-related 1	1.85717	2.2756	2.14034	2.7945	0	0	0	0	Testis
FBgn0029817	-9.42223	1.00594	348.372	9.3751e-06	0.000115704	CG15764	CG15764		5.57151	3.20918	3.97492	4.4712	0	0	0	0	Testis
FBgn0029859	-5.26733	2.05202	281.439	1.81964e-07	1.37868e-05	CG15892	CG15892		9.17214	8.05213	8.011	10.4159	0.0913855	0.2274	0.218453	0.155917	Testis
FBgn0029890	-2.79261	1.08588	112.256	5.95119e-06	8.49037e-05	CG4095	Fum2	Fumarase 2	5.00299	2.97579	3.91377	4.11554	0.548313	0.3032	0.364088	0.571694	Testis
FBgn0029940	-4.62845	1.02479	220.79	4.59828e-07	2.0533e-05	CG1958	CG1958		5.07879	3.55928	4.09723	4.11554	0.121847	0.0758	0.0728176	0.259861	Testis
FBgn0029945	-1.65842	2.00758	38.3011	0.000276707	0.0024123	CG18155	CG18155		7.35287	7.1769	6.17642	6.30033	1.30986	0.960133	1.52917	3.27425	Testis
FBgn0029946	-6.50536	0.920435	142.713	2.51726e-06	4.93104e-05	CG15034	CG15034		4.24496	3.67597	3.3634	4.77606	0	0.0252667	0	0.103944	Testis
FBgn0029947	-8.85344	1.98652	280.691	1.92124e-07	1.37868e-05	CG1999	CG1999		8.86893	6.88516	7.94985	11.0764	0.0304618	0	0	0	Testis
FBgn0029949	-9.09438	0.691741	500.35	3.88385e-06	6.43075e-05	CG15035	CG15035		3.56273	3.67597	3.79147	2.74369	0	0	0	0	Testis
FBgn0029951	-9.40741	0.988612	609.693	2.39779e-06	4.83639e-05	CG11369	CG11369		4.09335	4.02607	4.89221	4.06473	0	0	0	0	Testis
FBgn0029952	-10.0098	1.56834	412.813	6.20485e-06	8.74614e-05	CG12689	CG12689		5.53361	5.19304	7.09371	8.02784	0	0	0	0	Testis
FBgn0029963	-8.91979	0.526174	355.244	8.94052e-06	0.000112048	CG10920	CG10920		2.53939	2.68404	3.42455	3.50583	0	0	0	0	Testis
FBgn0029986	-5.22862	0.388563	85.0485	1.71932e-05	0.000189649	CG15332	CG15332		3.37323	1.92551	2.81302	2.54046	0.0304618	0	0.0728176	0.155917	Testis
FBgn0029989	-7.12842	0.335337	187.202	8.69718e-07	2.7401e-05	CG15333	CG15333		2.95631	2.21725	2.14034	3.15017	0	0.0252667	0	0	Testis
FBgn0029993	-4.66755	0.676055	152.633	1.88801e-06	4.19058e-05	CG1571	CG1571		3.10792	2.85909	3.79147	3.3534	0.0609237	0.1516	0.0728176	0.0519722	Testis
FBgn0030004	-0.706818	2.43399	22.2275	0.00155593	0.0124628	CG10958	CG10958		9.32375	7.23525	6.60449	6.656	2.83295	2.93093	4.29624	4.52158	Testis
FBgn0030014	-6.27547	-0.417828	125.84	3.90391e-06	6.44514e-05	CG15337	CG15337		1.28865	1.51707	1.34536	1.72751	0	0	0	0.0519722	Testis
FBgn0030015	-4.63961	-0.0884881	41.0604	0.000228098	0.00200861	CG10761	CG10761		1.89507	1.75046	1.52882	2.13398	0	0	0.218453	0.103944	Testis
FBgn0030033	-10.1999	1.75409	1020.56	6.80273e-07	2.41114e-05	CG1387	CG1387		7.88349	7.00186	7.09371	7.62137	0	0	0	0	Testis
FBgn0030058	-1.43075	1.02111	38.5339	0.000268517	0.00234451	CG11294	CG11294		2.88051	3.32588	3.42455	3.15017	0.548313	0.707466	1.2379	1.40325	Testis
FBgn0030116	-8.25845	-0.0858709	224.741	2.71048e-05	0.000278968	CR17438	CR17438		1.47816	1.69212	2.38495	2.13398	0	0	0	0	Testis
FBgn0030120	-2.08394	0.397266	88.1258	1.45551e-05	0.000166583	CG17440	CG17440		2.04668	2.56735	1.83458	2.54046	0.304618	0.404267	0.364088	0.571694	Testis
FBgn0030191	-10.5585	3.66211	605.416	9.91533e-09	6.24776e-06	CG15306	CG15306		27.4027	26.0819	27.0906	32.7211	0	0.0252667	0	0	Testis
FBgn0030224	-8.26433	-0.0809176	252.846	2.03893e-05	0.000217345	CG12637	CG12637		1.40235	2.15891	2.2015	1.98156	0	0	0	0	Testis
FBgn0030247	-7.76502	2.49868	159.491	1.76241e-06	4.0067e-05	CG15208	CG15208		12.3559	10.7945	11.7413	14.9887	0.0304618	0	0	0.155917	Testis
FBgn0030277	-11.4532	2.98394	850.829	1.10014e-06	3.06095e-05	CG1394	CG1394		17.2451	14.7039	16.5724	21.8987	0	0	0	0	Testis
FBgn0030278	-10.2622	1.81432	1029.33	6.66165e-07	2.39862e-05	CG15200	CG15200		7.54238	8.05213	7.09371	8.23108	0	0	0	0	Testis
FBgn0030280	-10.102	1.65942	802.983	1.22327e-06	3.2566e-05	CG11106	CG11106		7.80769	6.41837	6.11527	7.31652	0	0	0	0	Testis
FBgn0030283	-9.71991	1.28836	412.738	6.20758e-06	8.74614e-05	CG15198	CG15198		4.81348	4.14276	5.99296	6.19872	0	0	0	0	Testis
FBgn0030296	-3.96359	-0.119069	76.3911	2.49651e-05	0.000257882	CG15196	CG15196		1.97087	1.57542	1.77343	1.6767	0.0304618	0.0252667	0.218453	0.155917	Testis
FBgn0030307	-7.93697	1.85711	209.165	5.97246e-07	2.28935e-05	CG33235	CG33235		8.60362	6.65176	8.56137	7.87542	0	0	0.0728176	0.0519722	Testis
FBgn0030313	-9.0368	0.638386	285.922	1.51407e-05	0.000170702	CG11697	Reepl1	Receptor accessory protein like 1	3.22162	2.56735	2.99648	4.36959	0	0	0	0	Testis
FBgn0030319	-4.56053	0.486204	41.0052	0.000229127	0.00201454	CG2533	CG2533		3.22162	2.10056	2.62956	3.3534	0	0.0758	0	0.311833	Testis
FBgn0030359	-3.01111	0.588792	105.031	7.62049e-06	0.000100854	CG18130	CG18130		3.41113	2.68404	2.99648	2.28641	0.152309	0.328467	0.218453	0.363805	Testis
FBgn0030370	-5.56102	0.0281032	99.8428	9.50602e-06	0.000117193	CG1950	Uch-L5R	Uch-L5-related	2.88051	1.57542	1.52882	2.18479	0.0609237	0.0252667	0	0	Testis
FBgn0030374	-6.90987	0.139984	149.438	2.07667e-06	4.46936e-05	CG15734	CG15734		2.50149	1.57542	2.14034	2.7945	0.0304618	0	0	0	Testis
FBgn0030376	-8.18468	2.88753	249.565	3.24626e-07	1.70376e-05	CG2750	CG2750		14.9711	16.8045	18.5293	15.4968	0	0.0505333	0	0.103944	Testis
FBgn0030377	-7.72002	0.909427	199.791	6.94953e-07	2.43277e-05	CG1924	CG1924		4.92718	3.44258	4.21953	3.45502	0	0	0	0.0519722	Testis
FBgn0030384	-7.98875	-0.324227	341.17	9.86306e-06	0.000121068	CG2577	CG2577		1.78137	1.40037	1.71227	1.47347	0	0	0	0	Testis
FBgn0030386	-8.70937	0.330609	472.788	4.45911e-06	7.02433e-05	CG2574	CG2574		2.50149	2.3923	2.87418	2.74369	0	0	0	0	Testis
FBgn0030409	-5.88345	0.706866	56.4319	7.69229e-05	0.000709317	CG15728	CG15728		3.86594	2.85909	2.99648	3.9123	0	0	0	0.207889	Testis
FBgn0030429	-1.71991	2.99391	16.4022	0.00385909	0.0292775	CG4661	CG4661		12.4696	13.4786	13.5759	14.9379	1.37078	1.3644	5.67977	5.82088	Testis
FBgn0030462	-5.80396	0.570837	116.242	5.41693e-06	7.94811e-05	CG15742	CG15742		2.5773	2.6257	2.99648	4.16635	0.0609237	0.0505333	0	0	Testis
FBgn0030483	-5.60939	-0.333152	65.9302	4.29858e-05	0.000422117	CG12725	CG12725		2.04668	1.22532	1.22305	1.6767	0	0	0	0.103944	Testis
FBgn0030536	-9.31905	0.902631	334.089	1.03785e-05	0.000126031	CG11068	CG11068		2.8047	4.49286	4.40299	4.36959	0	0	0	0	Testis
FBgn0030538	-8.0574	-0.266626	138.896	8.96228e-05	0.00081976	CG13402	betaNACtes1	Nascent-associated complex beta-subunit-like, testis 1	1.28865	1.16698	2.07919	2.13398	0	0	0	0	Testis
FBgn0030566	-5.05994	0.28611	43.3895	0.00018949	0.00168038	CG18313	betaNACtes4	Nascent-associated complex beta-subunit-like, testis 4	3.10792	1.45872	2.50726	2.69288	0	0	0.218453	0.103944	Testis
FBgn0030578	-7.98754	-0.326855	390.666	7.09582e-06	9.59538e-05	CG5347	CG5347		1.47816	1.69212	1.52882	1.6767	0	0	0	0	Testis
FBgn0030599	-8.30097	-0.0443937	292.576	1.43196e-05	0.000164054	CG9030	CG9030		1.78137	1.92551	1.71227	2.48965	0	0	0	0	Testis
FBgn0030614	-4.90202	-0.175271	79.6714	2.16728e-05	0.000228663	CG9072	CG9072		1.59186	1.22532	1.95689	2.13398	0.0304618	0.0252667	0.145635	0	Testis
FBgn0030620	-8.35679	0.00974931	172.866	5.24866e-05	0.000499834	CG5662	CG5662		2.7289	1.28367	2.2015	1.98156	0	0	0	0	Testis
FBgn0030622	-8.53931	0.176319	277.375	1.62958e-05	0.000181681	CG9101	CG9101		2.6531	1.98386	1.83458	2.84531	0	0	0	0	Testis
FBgn0030623	-8.92898	0.535986	618.636	2.31402e-06	4.72895e-05	CG15031	PPYR1	Protein phosphatase Y regulator 1	3.03211	3.09249	3.24109	2.89612	0	0	0	0	Testis
FBgn0030624	-9.64489	1.21694	497.099	3.94607e-06	6.49583e-05	CG9106	CG9106		4.88928	4.20111	4.95337	6.04629	0	0	0	0	Testis
FBgn0030629	-1.05362	2.3252	18.7336	0.00259266	0.0201411	CG9123	CG9123		8.71732	7.00186	7.27717	7.01166	1.82771	1.69287	3.85933	4.62552	Testis
FBgn0030647	-6.18972	0.605408	113.96	5.86811e-06	8.42482e-05	CG6324	CG6324		3.29742	1.92551	3.60801	3.86149	0	0.0505333	0	0.0519722	Testis
FBgn0030660	-1.57469	2.65227	118.747	4.82556e-06	7.37621e-05	CG8097	CG8097		11.8252	9.51085	9.84558	10.7207	2.7111	1.895	2.9127	3.742	Testis
FBgn0030661	-2.71271	-0.144619	13.7352	0.00622934	0.0458489	CG8105	Alp11	Alkaline phosphatase 11	1.74346	1.45872	1.58997	1.52427	0	0.0505333	0.436905	0.46775	Testis
FBgn0030667	-7.40717	1.29032	310.003	1.24343e-07	1.29385e-05	CG15599	CG15599		4.88928	4.95965	5.44259	5.84305	0.0304618	0.0252667	0	0	Testis
FBgn0030691	-2.17488	1.94643	101.79	8.55879e-06	0.00010927	CG8959	Efhc1.1	EF-hand domain containing 1.1	7.08756	5.77653	8.13331	6.80842	1.40124	1.01067	1.2379	1.09142	Testis
FBgn0030697	-12.4017	3.92406	2761.28	5.92402e-08	1.01803e-05	CG8565	CG8565		33.6944	32.2669	34.5513	35.668	0	0	0	0	Testis
FBgn0030722	-6.11561	0.117861	119.757	4.82525e-06	7.37621e-05	CG12395	CG12395		2.5773	1.80881	1.71227	2.69288	0	0.0252667	0.0728176	0	Testis
FBgn0030725	-2.89831	1.04974	14.039	0.00588039	0.0435064	CG8958	CG8958		1.93297	2.33395	9.96789	1.52427	0.182771	0.202133	0.582541	0.883527	Testis
FBgn0030757	-0.891663	3.10802	31.3179	0.000531728	0.00450736	CG9902	CG9902		12.5833	11.0863	12.414	13.9217	4.35604	3.4868	6.69922	7.38005	Testis
FBgn0030764	-1.73725	2.29898	55.1408	7.84604e-05	0.00072232	CG9777	CG9777		8.94473	8.86902	7.94985	7.82461	1.24894	1.6676	3.20397	1.97494	Testis
FBgn0030770	-3.6633	0.114104	84.3273	1.73272e-05	0.000190616	CG13010	CG13010		1.89507	2.509	2.07919	1.82913	0.121847	0.0252667	0.218453	0.207889	Testis
FBgn0030780	-4.80565	1.94264	72.1276	3.23726e-05	0.000327246	CG13008	CG13008		9.55116	6.88516	9.47866	6.70681	0.152309	0.1516	0.655358	0.0519722	Testis
FBgn0030814	-5.48849	0.854521	88.2667	1.53012e-05	0.000171999	CG4955	CG4955		4.20706	3.44258	3.30224	4.16635	0	0.0252667	0.0728176	0.207889	Testis
FBgn0030840	-6.63088	-0.111217	148.956	2.07025e-06	4.46403e-05	CG12993	p-cup	presidents-cup	2.34989	1.92551	1.34536	1.82913	0.0304618	0	0	0	Testis
FBgn0030846	-1.93215	2.6169	14.4646	0.00543185	0.040505	CG12992	CG12992		8.79313	13.5369	11.3744	9.60293	0.639699	1.03593	3.20397	4.98933	Testis
FBgn0030918	-6.36474	0.806313	223.721	4.37142e-07	2.01165e-05	CG15056	CG15056		3.56273	3.50093	4.15838	3.55664	0	0.0252667	0.0728176	0.0519722	Testis
FBgn0030933	-5.72287	1.22417	80.0095	2.23245e-05	0.000234449	CG6470	CG6470		4.81348	4.20111	5.32028	5.5382	0	0.0758	0	0.207889	Testis
FBgn0030936	-7.59487	1.47918	153.28	1.96862e-06	4.28562e-05	CG6481	CG6481		7.50448	5.48479	4.76991	6.45276	0.0609237	0	0	0	Testis
FBgn0030940	-6.6227	1.42243	108.639	7.33462e-06	9.78592e-05	CG15040	CG15040		3.07001	6.24332	7.76639	6.04629	0	0.0252667	0.145635	0.0519722	Testis
FBgn0030951	-8.12935	-0.198313	309.57	1.24875e-05	0.000147548	CG6873	CG6873		1.81927	1.51707	1.58997	2.08317	0	0	0	0	Testis
FBgn0030952	-8.72847	0.352616	312.921	1.21656e-05	0.000144635	CG12609	CG12609		3.52483	2.509	2.07919	2.54046	0	0	0	0	Testis
FBgn0030975	-7.45126	2.46151	244.293	3.39193e-07	1.74078e-05	CG7349	SdhBL	Succinate dehydrogenase, subunit B (iron-sulfur)-like	14.0993	10.9112	10.396	13.2104	0	0.0758	0.0728176	0.0519722	Testis
FBgn0030979	-8.9511	0.558121	390.617	7.09798e-06	9.59538e-05	CG14190	CG14190		3.25952	2.56735	2.87418	3.70907	0	0	0	0	Testis
FBgn0030989	-2.74205	0.0818854	66.1059	4.12439e-05	0.000406419	CG7537	Inx5	Innexin 5	2.08458	1.45872	1.71227	2.28641	0.152309	0.101067	0.364088	0.363805	Testis
FBgn0031082	-5.19614	-0.252239	103.075	8.31587e-06	0.000107468	CG17003	CG17003		2.38779	1.28367	1.58997	1.27023	0	0.0252667	0.0728176	0.0519722	Testis
FBgn0031085	-9.66289	1.23457	546.909	3.12617e-06	5.65503e-05	CG9570	CG9570		5.4957	4.08442	5.44259	5.33496	0	0	0	0	Testis
FBgn0031101	-8.05303	-0.266691	401.767	6.6282e-06	9.15677e-05	CG1631	CG1631		1.85717	1.75046	1.58997	1.47347	0	0	0	0	Testis
FBgn0031103	-8.79841	0.414819	425.628	5.75984e-06	8.32072e-05	CG12679	CG12679		2.91841	3.44258	2.3238	2.54046	0	0	0	0	Testis
FBgn0031108	-7.60518	0.823484	109.731	6.89264e-06	9.41883e-05	CG15459	CG15459		4.51027	3.15083	2.07919	5.23334	0	0	0.0728176	0	Testis
FBgn0031127	-3.12786	1.47242	89.7758	1.38771e-05	0.000159954	CG1835	CG1835		5.2683	4.84295	5.44259	6.0971	0.304618	0.252667	0.946629	0.623666	Testis
FBgn0031128	-11.7088	3.23683	1957.54	1.37809e-07	1.31872e-05	CG1338	hydra	hydra	22.3618	19.3718	20.1192	22.4068	0	0	0	0	Testis
FBgn0031129	-9.65452	2.77253	473.57	2.54556e-08	8.8712e-06	CG1324	CG1324		15.4638	15.4041	14.7378	15.2427	0.0304618	0	0	0	Testis
FBgn0031130	-8.22626	-0.111101	356.572	8.85984e-06	0.000111628	CG15452	CG15452		2.08458	1.57542	2.01804	1.82913	0	0	0	0	Testis
FBgn0031132	-8.77681	0.395264	533.7	3.31831e-06	5.80807e-05	CG15450	CG15450		2.99421	2.80074	2.38495	2.84531	0	0	0	0	Testis
FBgn0031134	-5.45468	0.773275	102.316	8.73956e-06	0.00011063	CG1314	CG1314		4.01755	2.6257	3.42455	4.16635	0	0.101067	0.0728176	0.0519722	Testis
FBgn0031139	-4.69641	0.0945641	390.168	5.09489e-08	9.79429e-06	CG11227	CG11227		2.50149	1.86716	2.07919	2.03237	0.0609237	0.0505333	0.0728176	0.0519722	Testis
FBgn0031142	-1.93661	1.67996	57.2854	6.85918e-05	0.000636635	CG10998	r-cup	ryder cup	5.72311	5.36809	6.48218	4.72525	0.852931	0.631666	1.38353	1.97494	Testis
FBgn0031155	-8.57154	0.205042	427.348	5.70358e-06	8.25128e-05	CG15446	CG15446		2.7289	2.04221	2.38495	2.38803	0	0	0	0	Testis
FBgn0031157	-5.64289	0.14788	101.231	9.03485e-06	0.000113105	CG1503	CG1503		2.23618	1.63377	1.65112	3.40421	0.0304618	0	0.0728176	0.0519722	Testis
FBgn0031163	-7.56431	1.47574	133.896	3.35128e-06	5.83874e-05	CG14579	CG14579		5.91262	5.19304	5.62605	7.36733	0	0	0	0.103944	Testis
FBgn0031164	-3.78568	-0.592499	26.3999	0.00095083	0.00779777	CG1724	CG1724		1.17494	1.22532	1.22305	1.16861	0	0	0.218453	0.155917	Testis
FBgn0031168	-1.16249	1.29667	15.0457	0.0047993	0.0359773	CG1722	CG1722		3.14582	3.15083	4.5253	3.9123	0.761546	0.884333	2.25734	1.55917	Testis
FBgn0031169	-3.6243	1.52332	241.482	3.25971e-07	1.70376e-05	CG1494	CG1494		6.25373	5.018	6.17642	5.79224	0.274157	0.3032	0.29127	0.623666	Testis
FBgn0031171	-7.06389	1.78478	405.508	4.3853e-08	9.54885e-06	CG1801	CG1801		7.46658	7.46865	7.58293	7.57056	0.0609237	0.0252667	0	0.0519722	Testis
FBgn0031201	-6.43058	-0.28127	112.851	5.96906e-06	8.49524e-05	CG12446	CG12446		1.36445	1.40037	1.52882	2.2356	0	0	0	0.0519722	Testis
FBgn0031208	-9.42835	1.00863	363.561	8.45154e-06	0.000108226	CR11023	CR11023		4.13125	3.26753	5.25913	4.62363	0	0	0	0	Testis
FBgn0031235	-9.16379	0.761652	271.928	1.72408e-05	0.00018985	CG13693	CG13693		5.15459	2.91744	2.93533	3.40421	0	0	0	0	Testis
FBgn0031240	-9.67784	2.80931	360.694	7.52587e-08	1.10855e-05	CG3345	CG3345		18.1927	13.1868	14.004	16.9703	0	0	0	0.0519722	Testis
FBgn0031279	-5.29129	-0.212102	98.5908	9.88289e-06	0.00012118	CG3544	CG3544		2.38779	1.51707	1.40651	1.47347	0.0609237	0.0252667	0	0	Testis
FBgn0031288	-1.27262	-0.187063	30.3215	0.000590228	0.00497722	CG13949	CG13949		1.17494	1.28367	1.58997	1.01618	0.396004	0.353733	0.509723	0.363805	Testis
FBgn0031292	-4.56271	2.08219	52.7299	9.73456e-05	0.000886822	CG15824	CG15824		9.28585	8.28553	8.68368	9.70455	0.578775	0.277933	0.0728176	0.0519722	Testis
FBgn0031295	-6.34133	2.29039	407.287	4.31316e-08	9.54885e-06	CG4375	CG4375		10.4229	10.5611	10.396	11.4321	0.0609237	0.126333	0.145635	0.0519722	Testis
FBgn0031296	-5.13916	1.54761	59.6278	6.34564e-05	0.000591877	CG4415	CG4415		8.48992	3.79267	5.62605	6.91004	0.304618	0.0505333	0	0.103944	Testis
FBgn0031301	-4.35147	0.148517	51.1134	0.000107785	0.000976438	CG14339	CG14339		1.89507	1.63377	1.89573	3.30259	0.0304618	0.0505333	0	0.259861	Testis
FBgn0031323	-6.84505	0.0807082	187.783	8.54277e-07	2.72169e-05	CG5139	CG5139		2.50149	1.98386	2.07919	2.08317	0.0304618	0	0	0	Testis
FBgn0031331	-8.51065	0.146885	205.34	3.39563e-05	0.000340825	CG5440	CG5440		2.04668	1.63377	2.44611	2.99774	0	0	0	0	Testis
FBgn0031332	-8.13758	-0.188284	240.221	2.30771e-05	0.000241235	CG5556	CG5556		2.19828	1.63377	1.28421	1.93075	0	0	0	0	Testis
FBgn0031333	-9.60848	1.18208	421.658	5.89279e-06	8.4409e-05	CG5561	CG5561		4.62397	4.25946	4.40299	6.30033	0	0	0	0	Testis
FBgn0031335	-6.9253	0.826171	144.142	2.42479e-06	4.8512e-05	CG5565	CG5565		3.63854	3.32588	4.03608	4.06473	0	0.0505333	0	0	Testis
FBgn0031337	-6.69835	0.612797	101.425	9.15758e-06	0.000114012	CG14346	CG14346		2.84261	2.04221	3.66916	4.26797	0	0.0505333	0	0	Testis
FBgn0031343	-8.50577	1.64228	287.848	1.71186e-07	1.37868e-05	CG18131	CG18131		7.73189	5.25139	6.72679	7.51975	0	0.0252667	0	0	Testis
FBgn0031347	-6.03257	3.47428	292.853	1.75584e-07	1.37868e-05	CG10869	CG10869		26.91	21.4724	22.9934	26.5732	0.152309	0.1516	0.364088	0.623666	Testis
FBgn0031365	-3.9786	0.397217	64.2519	4.71116e-05	0.000455533	CG17650	CG17650		3.44903	2.15891	2.26265	2.54046	0.213233	0.0758	0	0.155917	Testis
FBgn0031367	-9.51258	1.09103	452.795	4.95415e-06	7.492e-05	CG15623	c-cup	calcutta cup	5.00299	3.73432	4.15838	5.43658	0	0	0	0	Testis
FBgn0031372	-9.89559	1.4596	746.963	1.45991e-06	3.57632e-05	CG7295	CG7295		6.89806	5.54314	5.38144	6.14791	0	0	0	0	Testis
FBgn0031388	-10.0855	1.64359	609.147	2.40303e-06	4.83639e-05	CG12674	CG12674		7.54238	6.47672	5.44259	7.87542	0	0	0	0	Testis
FBgn0031393	-1.56693	-0.0589381	37.9451	0.000282714	0.00246278	CG15382	CG15382		1.59186	1.80881	1.22305	1.27023	0.304618	0.404267	0.509723	0.311833	Testis
FBgn0031407	-8.18325	-0.147993	290.347	1.45876e-05	0.000166787	CG4270	CG4270		2.31199	1.92551	1.58997	1.47347	0	0	0	0	Testis
FBgn0031410	-8.01692	1.17743	259.536	2.50588e-07	1.53602e-05	CG17237	CG17237		4.96508	4.49286	4.40299	5.63981	0.0304618	0	0	0	Testis
FBgn0031423	-8.56569	0.20189	229.787	2.569e-05	0.000264887	CG3557	CG3557		3.03211	2.6257	1.52882	2.33722	0	0	0	0	Testis
FBgn0031426	-1.16747	1.74813	19.6725	0.00224114	0.0176154	CG18641	CG18641		4.51027	7.4103	4.5253	4.11554	1.61448	1.33913	1.38353	2.96241	Testis
FBgn0031430	-8.7153	0.338496	398.668	6.7543e-06	9.297e-05	CG3528	CG3528		3.07001	2.15891	2.56841	2.74369	0	0	0	0	Testis
FBgn0031431	-7.69069	0.863465	137.289	2.93135e-06	5.4427e-05	CG3515	CG3515		5.3441	2.04221	3.3634	4.67444	0	0.0252667	0	0	Testis
FBgn0031440	-9.01963	0.623668	257.689	1.96351e-05	0.000210692	CG15395	CG15395		3.94175	2.15891	3.24109	3.65826	0	0	0	0	Testis
FBgn0031441	-8.81064	0.427708	243.363	2.24406e-05	0.000235232	CG9962	CG9962		3.48693	1.86716	2.99648	2.89612	0	0	0	0	Testis
FBgn0031442	-8.66645	0.292685	342.037	9.8025e-06	0.000120455	CG17301	Prosbeta4R1	Proteasome beta4 subunit-related 1	2.95631	3.03414	2.3238	1.93075	0	0	0	0	Testis
FBgn0031443	-6.82229	0.0932325	123.364	4.32951e-06	6.89681e-05	CG17302	Prosbeta4R2	Proteasome beta4 subunit-related 2	2.53939	1.69212	2.3238	2.13398	0	0	0.0728176	0	Testis
FBgn0031444	-6.62447	0.625894	75.1629	2.7938e-05	0.000286245	CG9879	CG9879		3.71434	2.33395	2.75187	4.06473	0	0	0.145635	0	Testis
FBgn0031451	-5.80489	1.47632	153.41	1.9213e-06	4.24325e-05	CG9961	CG9961		5.98842	5.30974	5.38144	7.16409	0.0609237	0.0505333	0	0.207889	Testis
FBgn0031462	-5.20828	1.2173	152.341	1.95865e-06	4.28028e-05	CG2964	CG2964		5.76101	3.61763	4.03608	6.14791	0.0304618	0.101067	0.0728176	0.207889	Testis
FBgn0031463	-2.9882	1.94688	72.2078	3.1041e-05	0.000316039	CG15400	G6P	Glucose-6-Phosphatase	8.52782	6.24332	7.46063	7.87542	0.426466	0.353733	1.01945	1.45522	Testis
FBgn0031465	-1.07333	1.52598	18.0415	0.00287558	0.0222323	CG3123	CG3123		4.85138	4.08442	4.28069	3.86149	0.883393	1.18753	2.4758	2.13086	Testis
FBgn0031476	-6.15766	1.18683	294.956	1.50729e-07	1.31872e-05	CG8813	CG8813		5.382	4.55121	4.40299	5.13172	0.0609237	0.0505333	0	0.0519722	Testis
FBgn0031483	-1.75575	3.9121	123.219	4.20248e-06	6.7995e-05	CG9641	CG9641		29.0704	22.2892	24.2776	28.5547	5.0262	4.2448	8.22839	7.38005	Testis
FBgn0031496	-2.20658	0.986256	43.596	0.000179313	0.00159511	CG17258	CG17258		4.01755	2.68404	3.91377	3.40421	0.274157	0.758	0.582541	0.72761	Testis
FBgn0031501	-4.63418	2.3194	319.741	1.10311e-07	1.2812e-05	CG17261	CG17261		10.9535	8.86902	10.5183	12.1434	0.396004	0.2274	0.218453	0.46775	Testis
FBgn0031504	-6.93358	0.175084	160.991	1.56153e-06	3.73647e-05	CG15403	CG15403		2.6531	2.68404	1.83458	2.13398	0	0	0	0.0519722	Testis
FBgn0031513	-9.3321	0.918763	534.117	3.312e-06	5.80807e-05	CG3347	CG3347		4.35866	4.14276	3.24109	4.4712	0	0	0	0	Testis
FBgn0031526	-3.1157	2.02771	20.5403	0.00203042	0.0160929	CG8838	CG8838		8.30041	8.11048	7.03256	8.78998	0.243695	0.126333	0.728176	2.28678	Testis
FBgn0031531	-9.84827	1.41355	443.142	5.22114e-06	7.72075e-05	CG8840	CG8840		6.17793	4.43451	5.50374	7.01166	0	0	0	0	Testis
FBgn0031545	-10.0484	3.91696	454.238	3.27256e-08	9.34652e-06	CG3213	CG3213		38.1667	33.0254	29.2921	35.1091	0.0304618	0	0.0728176	0	Testis
FBgn0031546	-8.62263	1.75607	320.44	1.12462e-07	1.2812e-05	CG8851	CG8851		8.90683	6.82681	6.29873	7.57056	0	0.0252667	0	0	Testis
FBgn0031554	-2.60225	1.08608	61.1872	5.51184e-05	0.000522704	CG15418	CG15418		4.54817	3.61763	3.30224	4.21716	0.365542	0.2274	0.946629	0.675638	Testis
FBgn0031574	-2.05744	3.3018	102.647	8.44497e-06	0.000108226	CG3964	TTLL4B	Tubulin tyrosine ligase-like 4B	19.1781	18.2632	17.3674	16.4114	2.74157	1.84447	4.73314	4.72947	Testis
FBgn0031585	-10.091	3.95918	462.16	3.06163e-08	9.34652e-06	CG2955	CG2955		39.8344	32.9671	31.6159	35.2107	0.0304618	0	0.0728176	0	Testis
FBgn0031592	-8.93238	0.543042	139.606	9.09012e-05	0.000830782	CG3675	Art2	Arginine methyltransferase 2	4.09335	1.57542	2.93533	3.60745	0	0	0	0	Testis
FBgn0031596	-6.17989	-0.47933	101.401	8.86871e-06	0.000111628	CG15429	CG15429		1.59186	1.45872	1.40651	1.1178	0	0	0.0728176	0	Testis
FBgn0031613	-1.32679	0.865021	33.9053	0.000410484	0.00352705	CG15636	HP6	Heterochromatin protein 6	3.03211	2.2756	3.11879	2.74369	0.700622	0.934866	1.01945	0.779583	Testis
FBgn0031620	-9.14375	3.03527	327.747	1.14236e-07	1.2812e-05	CG11929	CG11929		18.2685	17.5046	18.407	18.8502	0	0	0.0728176	0.0519722	Testis
FBgn0031622	-6.28479	-0.426837	129.573	3.48148e-06	5.93789e-05	CG3251	CG3251		1.51606	1.05028	1.46766	1.77832	0	0.0252667	0	0	Testis
FBgn0031623	-2.88689	2.81111	157.041	1.71614e-06	3.98046e-05	CG15632	Taf12L	TBP-associated factor 30kD subunit alpha-2	12.4317	11.4364	11.4355	19.6123	1.15755	1.31387	1.60199	1.81903	Testis
FBgn0031626	-8.10931	1.98437	303.203	1.41789e-07	1.31872e-05	CG15631	CG15631		9.96807	7.64369	7.27717	9.85697	0	0.0252667	0	0.0519722	Testis
FBgn0031631	-0.962356	1.9487	24.0083	0.00123044	0.00997546	CG3225	CG3225		5.4957	5.89323	4.09723	7.01166	1.79725	1.94553	2.83989	2.59861	Testis
FBgn0031644	-4.87473	0.25183	503.821	1.88181e-08	7.62268e-06	CG15625	CG15625		2.34989	2.33395	2.38495	2.54046	0.0609237	0.0505333	0.0728176	0.0519722	Testis
FBgn0031690	-6.00804	1.8241	664.082	6.39046e-09	6.16818e-06	CG7742	CG7742		8.48992	6.06827	7.52178	8.53594	0.0913855	0.0758	0.0728176	0.103944	Testis
FBgn0031707	-5.54649	0.36398	77.4076	2.46045e-05	0.000254853	CG14020	CG14020		3.25952	2.74239	1.65112	2.89612	0	0.0758	0.0728176	0	Testis
FBgn0031720	-9.09733	0.697456	371.454	8.02162e-06	0.000104817	CG14013	CG14013		4.16916	3.26753	2.56841	3.75988	0	0	0	0	Testis
FBgn0031721	-8.15367	-0.17599	336.986	1.01631e-05	0.000123813	CG14017	CG14017		1.93297	1.57542	1.58997	2.03237	0	0	0	0	Testis
FBgn0031722	-9.61977	1.19432	447.996	5.08441e-06	7.60784e-05	CG14011	CG14011		5.76101	4.02607	4.28069	5.69062	0	0	0	0	Testis
FBgn0031723	-9.82314	1.38907	345.436	9.65975e-06	0.00011883	CG7251	CG7251		5.79892	4.08442	5.50374	7.31652	0	0	0	0	Testis
FBgn0031724	-10.9819	2.5198	769.141	1.35912e-06	3.41279e-05	CG18266	CG18266		14.9332	10.5611	11.0075	14.379	0	0	0	0	Testis
FBgn0031728	-10.874	3.97579	635.395	8.36028e-09	6.16818e-06	CG7235	Hsp60C	Heat shock protein 60C	40.5545	33.1421	29.7202	37.9036	0	0.0252667	0	0	Testis
FBgn0031733	-8.44044	0.0810342	289.363	1.47081e-05	0.000167658	CG14006	CG14006		1.66766	2.45065	2.07919	2.54046	0	0	0	0	Testis
FBgn0031751	-6.41422	1.67167	279.747	1.86978e-07	1.37868e-05	CG9016	CG9016		7.31497	5.89323	6.29873	8.07865	0.0609237	0.0505333	0	0.103944	Testis
FBgn0031757	-8.38996	0.0392414	192.999	3.94161e-05	0.000390443	CG9064	Ucp4C	Ucp4C	2.7668	1.51707	2.44611	1.6767	0	0	0	0	Testis
FBgn0031758	-8.04772	-0.268946	214.652	3.02808e-05	0.000308853	CG18340	Ucp4B	Uncoupling protein 4B	2.04668	1.80881	1.10075	1.6767	0	0	0	0	Testis
FBgn0031784	-9.99211	1.55201	769.201	1.35886e-06	3.41279e-05	CG9222	CG9222		6.51904	5.60148	6.66564	6.80842	0	0	0	0	Testis
FBgn0031785	-8.33929	2.22776	175.391	1.23349e-06	3.26874e-05	CG13991	CG13991		9.62696	10.3277	10.0902	11.2796	0	0	0	0.103944	Testis
FBgn0031786	-9.45611	1.03528	316.513	1.1839e-05	0.000141644	CG13989	CG13989		3.82804	3.44258	4.58645	5.74143	0	0	0	0	Testis
FBgn0031826	-2.69943	0.653308	32.4712	0.000487437	0.00416304	CG9550	CG9550		3.41113	3.15083	2.14034	2.89612	0.0913855	0.505333	0.509723	0.259861	Testis
FBgn0031831	-3.81972	1.25041	87.8946	1.51656e-05	0.000170813	CG11043	COX5BL	Cytochrome c oxidase subunit 5B-like	4.85138	3.79267	3.91377	6.70681	0.33508	0.3032	0.145635	0.155917	Testis
FBgn0031849	-5.74633	2.93619	194.445	8.36203e-07	2.68714e-05	CG11327	CG11327		18.9507	14.2371	15.0436	18.6978	0.0913855	0.126333	0.364088	0.519722	Testis
FBgn0031853	-5.41039	2.42562	764.994	3.67054e-09	6.16818e-06	CG11201	TTLL3B	Tubulin tyrosine ligase-like 3B	12.0147	11.203	10.7629	12.6007	0.213233	0.126333	0.218453	0.311833	Testis
FBgn0031856	-6.0544	0.0423821	111.638	6.27653e-06	8.83231e-05	CG11322	CG11322		2.16038	2.21725	1.1619	2.7945	0	0.0252667	0	0.0519722	Testis
FBgn0031858	-3.23829	1.76837	307.761	1.27886e-07	1.30674e-05	CG17378	CG17378		7.42868	6.71011	5.93181	7.01166	0.396004	0.480066	0.582541	0.831555	Testis
FBgn0031859	-11.8255	3.35265	1342.61	3.47434e-07	1.74363e-05	CG17377	CG17377		26.5689	20.1887	20.0581	24.5916	0	0	0	0	Testis
FBgn0031861	-6.76635	0.698123	208.981	5.71265e-07	2.25759e-05	CG17375	CG17375		3.90385	3.15083	2.81302	3.81069	0	0.0252667	0	0.0519722	Testis
FBgn0031878	-0.697913	5.13813	32.13	0.000489341	0.00417301	CG9188	sip2	septin interacting protein 2	49.9541	44.6952	51.4294	50.0978	22.5418	22.1589	24.9764	24.7388	Testis
FBgn0031905	-8.13519	2.01534	317.632	1.18332e-07	1.2812e-05	CG5155	gudu	gudu	9.58906	7.93544	8.50022	9.50131	0.0304618	0	0	0.0519722	Testis
FBgn0031920	-10.6472	2.19072	1118.87	5.43078e-07	2.21617e-05	CG6441	CG6441		10.1955	11.1446	8.62253	10.4667	0	0	0	0	Testis
FBgn0031941	-8.09827	1.27073	208.542	5.97446e-07	2.28935e-05	CG7211	ATPsynGL	ATP synthase, subunit G-like	6.21583	3.90937	4.95337	5.74143	0	0	0	0.0519722	Testis
FBgn0031946	-5.88959	1.50914	92.1992	1.33646e-05	0.000155385	CG7164	CG7164		6.93596	5.19304	5.6872	6.656	0.152309	0.0758	0	0	Testis
FBgn0031954	-8.09634	-0.228475	257.245	1.95561e-05	0.000210442	CG14537	CG14537		1.62976	1.63377	1.40651	2.18479	0	0	0	0	Testis
FBgn0031986	-5.36739	1.20582	107.808	7.25805e-06	9.73059e-05	CG8673	CG8673		5.11669	4.14276	5.13682	5.13172	0.152309	0.0252667	0	0.155917	Testis
FBgn0032003	-6.30583	0.255277	208.993	5.67515e-07	2.25759e-05	CG8349	CG8349		2.12248	2.56735	2.3238	2.84531	0.0304618	0.0252667	0	0	Testis
FBgn0032004	-2.94319	1.61566	82.3424	1.90984e-05	0.000206496	CG8292	CG8292		6.97386	5.83488	4.76991	6.14791	0.33508	0.328467	0.873811	1.09142	Testis
FBgn0032039	-8.25286	-0.0875463	481.37	4.26781e-06	6.83693e-05	CG13385	CG13385		2.00877	1.98386	1.89573	1.77832	0	0	0	0	Testis
FBgn0032047	-1.09959	2.89369	81.6383	1.92473e-05	0.000207315	CG13088	CG13088		12.3938	10.2694	10.0902	12.4482	3.65542	3.36047	4.51469	5.24919	Testis
FBgn0032061	-4.55058	3.31829	146.017	2.45184e-06	4.86168e-05	CG9314	CG9314		22.0965	18.6716	18.5904	26.0651	0.396004	0.353733	0.873811	1.50719	Testis
FBgn0032065	-8.06015	-0.261091	301.299	1.33353e-05	0.000155286	CG12438	CG12438		1.85717	1.75046	1.83458	1.27023	0	0	0	0	Testis
FBgn0032072	-6.67988	-0.0546285	147.938	2.12457e-06	4.52099e-05	CG9483	CG9483		2.42569	1.80881	1.71227	1.82913	0	0	0	0.0519722	Testis
FBgn0032089	-3.16154	-0.0924829	51.5586	0.000101388	0.000919954	CG9573	Rcd-1r	Rcd-1 related	1.89507	1.63377	1.52882	1.82913	0.274157	0.0758	0.145635	0.0519722	Testis
FBgn0032104	-6.61872	-0.0925949	122.945	4.33883e-06	6.90012e-05	CG17009	aust	australin	1.78137	1.86716	1.77343	2.13398	0	0	0.0728176	0	Testis
FBgn0032110	-7.86581	-0.432598	316.058	1.18746e-05	0.00014192	CG3748	CG3748		1.70556	1.34202	1.52882	1.27023	0	0	0	0	Testis
FBgn0032111	-8.90889	0.520464	309.293	1.25146e-05	0.000147548	CG13110	CG13110		3.75224	2.45065	2.44611	3.40421	0	0	0	0	Testis
FBgn0032115	-5.32052	1.75705	84.8487	1.80631e-05	0.000196992	CG4438	CG4438		7.92139	6.24332	7.27717	7.41813	0.0304618	0.126333	0.436905	0.0519722	Testis
FBgn0032117	-1.24836	3.34822	25.7642	0.00100598	0.00822626	CG4435	FucTB	alpha1,3-fucosyltransferase B	16.2976	14.3538	15.5939	17.8848	7.12807	4.42166	3.93215	5.19722	Testis
FBgn0032150	-0.694989	1.75685	13.9014	0.00590908	0.0436617	CG13123	CG13123		4.35866	4.60955	4.5253	4.87768	2.19325	1.33913	2.33016	3.32622	Testis
FBgn0032175	-9.67875	1.24936	831.325	1.12376e-06	3.08298e-05	CG13131	CG13131		5.07879	5.07635	5.07567	5.38577	0	0	0	0	Testis
FBgn0032176	-7.4154	0.60029	195.903	7.41008e-07	2.54773e-05	CG13127	CG13127		3.33532	2.33395	3.85262	3.25179	0	0.0252667	0	0	Testis
FBgn0032268	-2.52596	1.33676	26.8572	0.000901373	0.00741361	CG6138	CG6138		3.79014	4.49286	4.46415	5.89386	0.152309	0.4548	1.31072	0.883527	Testis
FBgn0032269	-10.3011	3.42453	468.201	2.7892e-08	9.03861e-06	CG7363	w-cup	world cup	28.3124	21.9391	21.9538	23.9311	0	0	0	0.0519722	Testis
FBgn0032271	-3.73045	-0.140843	78.9034	2.20731e-05	0.000232454	CG7329	CG7329		2.04668	1.57542	1.83458	1.42266	0.121847	0.0758	0	0.155917	Testis
FBgn0032276	-11.0161	2.55317	1356.33	3.38882e-07	1.74078e-05	CG17098	CG17098		14.4404	11.9032	12.2305	13.566	0	0	0	0	Testis
FBgn0032291	-3.17253	0.984613	170.245	1.24089e-06	3.2807e-05	CG17118	CG17118		4.24496	3.44258	3.17994	4.4204	0.274157	0.202133	0.509723	0.415777	Testis
FBgn0032294	-6.83689	0.106639	107.422	7.25725e-06	9.73059e-05	CG6737	Vha16-5	Vacuolar H[+] ATPase 16kD subunit 5	2.5773	1.40037	2.44611	2.33722	0	0	0.0728176	0	Testis
FBgn0032312	-5.59376	-0.345609	62.5931	5.1959e-05	0.000495642	CG14071	CG14071		2.23618	1.45872	1.10075	1.32104	0	0	0	0.103944	Testis
FBgn0032313	-5.80416	1.1194	118.849	5.02071e-06	7.55237e-05	CG14070	CG14070		5.00299	4.31781	4.09723	5.0301	0.0304618	0.0252667	0	0.207889	Testis
FBgn0032314	-6.41409	2.51909	114.026	6.13769e-06	8.68001e-05	CG7309	CG7309		12.9623	11.378	13.2701	12.7023	0.152309	0	0.0728176	0.259861	Testis
FBgn0032318	-1.3879	0.503262	46.9237	0.000137497	0.00124064	CG14072	CG14072		2.53939	1.75046	2.38495	1.98156	0.487389	0.505333	0.800993	0.883527	Testis
FBgn0032338	-3.64762	1.51682	35.5425	0.000367906	0.00317806	CG16854	CG16854		6.59485	4.95965	5.93181	5.58901	0.0304618	0.202133	0.655358	0.779583	Testis
FBgn0032345	-4.00712	0.283171	105.132	7.62957e-06	0.000100856	CG14921	CG14921		2.53939	2.15891	2.56841	2.28641	0.0304618	0.0758	0.145635	0.259861	Testis
FBgn0032360	-11.2645	2.79742	769.254	1.40537e-06	3.4879e-05	CG14926	CG14926		13.455	14.2371	14.432	19.6631	0	0	0	0	Testis
FBgn0032366	-8.23709	-0.099005	215.692	2.99299e-05	0.000305824	CG14930	CG14930		2.34989	1.34202	1.71227	2.13398	0	0	0	0	Testis
FBgn0032369	-6.93308	1.34714	258.662	2.51924e-07	1.53602e-05	CG6614	CG6614		5.91262	4.9013	4.95337	6.14791	0	0.0252667	0.0728176	0.0519722	Testis
FBgn0032370	-7.20022	0.441894	146.032	2.30204e-06	4.72895e-05	CG12307	CG12307		3.25952	2.6257	2.38495	3.04855	0	0	0.0728176	0	Testis
FBgn0032371	-9.3187	2.47628	280.397	2.00222e-07	1.3932e-05	CG4983	CG4983		12.8865	11.5531	11.8025	13.0579	0	0	0.0728176	0	Testis
FBgn0032372	-8.4986	1.63462	280.317	1.90611e-07	1.37868e-05	CG4988	CG4988		6.59485	5.48479	6.60449	8.38351	0	0.0252667	0	0	Testis
FBgn0032375	-4.90033	0.91748	184.401	9.15574e-07	2.80661e-05	CG14932	CG14932		3.90385	2.85909	3.91377	4.9793	0.152309	0.0505333	0.0728176	0.103944	Testis
FBgn0032376	-4.56113	0.846634	46.2935	0.000152144	0.00136629	CG14936	Tsp33B	Tetraspanin 33B	4.05545	2.509	3.66916	4.4204	0.0609237	0	0.29127	0.259861	Testis
FBgn0032385	-8.31992	-0.0244416	181.455	4.63335e-05	0.000448774	CG16964	CG16964		2.6531	1.40037	2.3238	1.62589	0	0	0	0	Testis
FBgn0032424	-2.61956	1.2949	114.824	5.47014e-06	8.00562e-05	CG17010	CG17010		5.04089	4.14276	4.03608	5.13172	0.731084	0.404267	0.436905	0.72761	Testis
FBgn0032428	-3.64898	0.751427	63.2171	4.99043e-05	0.000479267	CG6405	CG6405		3.94175	2.3923	2.62956	4.21716	0.152309	0.0758	0.509723	0.207889	Testis
FBgn0032431	-1.10251	1.2923	19.2627	0.00237959	0.0185749	CG5435	CG5435		3.56273	4.20111	3.60801	3.20098	0.761546	1.3644	1.89326	1.35128	Testis
FBgn0032439	-7.23816	0.476625	146.623	2.26731e-06	4.67561e-05	CG17031	Ref2	RNA and export factor binding protein	3.29742	2.3923	2.87418	3.04855	0	0	0.0728176	0	Testis
FBgn0032447	-1.77302	1.99908	111.998	6.0024e-06	8.53124e-05	CG6167	PICK1	Protein interacting with C kinase 1	6.48114	6.65176	6.42103	7.72299	1.55355	1.01067	1.82044	2.02691	Testis
FBgn0032448	-8.21838	-0.114272	184.527	4.39048e-05	0.000429288	CG5781	CG5781		2.50149	1.57542	1.28421	2.08317	0	0	0	0	Testis
FBgn0032457	-6.61546	-0.116947	136.226	2.93201e-06	5.4427e-05	CG15483	CG15483		1.55396	1.69212	1.95689	2.2356	0	0	0	0.0519722	Testis
FBgn0032464	-5.7297	2.15682	240.99	3.43581e-07	1.74363e-05	CG5075	Vha68-3	Vacuolar H[+] ATPase 68kD subunit 3	9.89227	9.39416	9.0506	10.3651	0.0913855	0.176867	0.218453	0.0519722	Testis
FBgn0032471	-7.94409	1.82306	325.634	1.05674e-07	1.2812e-05	CG5122	CG5122		8.0351	8.46058	6.72679	7.82461	0	0.0252667	0	0.0519722	Testis
FBgn0032473	-5.19717	1.47094	142.93	2.50293e-06	4.93104e-05	CG5204	kmg	kumgang	6.67065	4.43451	5.87066	6.50357	0.182771	0.0505333	0.218453	0.0519722	Testis
FBgn0032478	-2.77716	1.28069	71.3979	3.18511e-05	0.000322838	CG5458	CG5458		5.07879	4.43451	3.97492	4.9793	0.426466	0.732733	0.364088	0.415777	Testis
FBgn0032481	-1.02181	4.72802	44.6832	0.00016264	0.00145363	CG16972	CG16972		34.6419	44.4618	42.1953	38.6149	11.2709	11.7995	20.753	19.6455	Testis
FBgn0032483	-3.02811	0.408242	139.699	2.62274e-06	5.06219e-05	CG15482	CG15482		2.27408	2.91744	1.95689	2.7945	0.152309	0.176867	0.364088	0.311833	Testis
FBgn0032492	-9.46772	1.04746	483.046	4.23181e-06	6.81779e-05	CG5648	Prosalpha6T	Proteasome alpha6 subunit, Testis-specific	4.39656	3.96772	3.97492	5.43658	0	0	0	0	Testis
FBgn0032503	-8.87905	0.490278	273.287	1.68925e-05	0.000187104	CG16825	CG16825		2.99421	2.15891	2.87418	3.75988	0	0	0	0	Testis
FBgn0032519	-4.89252	0.670916	209.008	5.67359e-07	2.25759e-05	CG16957	CG16957		3.67644	3.09249	3.42455	2.89612	0.0304618	0.0505333	0.145635	0.155917	Testis
FBgn0032520	-6.42514	2.94619	1070.07	9.82322e-10	6.16818e-06	CG10859	CG10859		18.8749	14.7622	15.5328	18.7486	0.121847	0.126333	0.218453	0.155917	Testis
FBgn0032522	-8.26517	-0.0726819	185.301	4.34661e-05	0.000426464	CG16848	CG16848		2.42569	2.04221	1.1619	2.08317	0	0	0	0	Testis
FBgn0032525	-7.65011	0.822562	250.293	2.83981e-07	1.61726e-05	CG16954	Hsp60D	Heat shock protein 60D	4.09335	3.55928	3.24109	4.16635	0	0.0252667	0	0	Testis
FBgn0032530	-2.24459	1.52544	15.9394	0.00417607	0.0315136	CG9263	CG9263		4.73768	6.00993	4.95337	5.0301	0.243695	0.328467	2.18453	1.14339	Testis
FBgn0032553	-7.06895	0.975132	132.656	3.33303e-06	5.82484e-05	CG4480	CG4480		4.20706	3.85102	3.4857	5.23334	0.0609237	0	0	0	Testis
FBgn0032554	-8.0443	-0.27128	173.403	5.09704e-05	0.000488265	CG15278	CG15278		2.34989	1.22532	1.65112	1.37185	0	0	0	0	Testis
FBgn0032563	-8.40189	0.0500068	300.321	1.34407e-05	0.000155874	CG15258	CG15258		2.691	2.04221	2.14034	1.62589	0	0	0	0	Testis
FBgn0032577	-5.41663	0.266898	288.006	1.6528e-07	1.37868e-05	CG13244	CG13244		2.95631	1.75046	2.56841	2.48965	0.0304618	0.0252667	0.0728176	0.0519722	Testis
FBgn0032588	-10.704	2.24638	1096.73	5.70321e-07	2.25759e-05	CG5968	CG5968		10.6124	10.0943	9.47866	11.7877	0	0	0	0	Testis
FBgn0032609	-4.99006	1.03874	414.346	4.0324e-08	9.54885e-06	CG13280	CG13280		4.77558	4.20111	4.34184	3.86149	0.0913855	0.0505333	0.145635	0.155917	Testis
FBgn0032624	-11.3482	2.88071	625.925	2.42517e-06	4.8512e-05	CG6304	CG6304		19.5192	12.1949	14.6155	19.2059	0	0	0	0	Testis
FBgn0032625	-9.38853	0.972748	258.642	2.00487e-05	0.000214319	CG15136	CG15136		4.54817	2.91744	3.73031	5.58901	0	0	0	0	Testis
FBgn0032626	-9.73465	1.3026	795.571	1.25133e-06	3.2831e-05	CG12620	CG12620		5.07879	5.36809	5.8095	5.18253	0	0	0	0	Testis
FBgn0032632	-9.67432	1.245	577.255	2.74017e-06	5.18848e-05	CG6380	CG6380		4.92718	4.43451	5.25913	5.89386	0	0	0	0	Testis
FBgn0032636	-9.6579	2.77649	399.671	4.9649e-08	9.79429e-06	CG5043	CG5043		18.9886	12.8951	13.7594	15.3444	0.0304618	0	0	0	Testis
FBgn0032637	-5.27563	2.55239	265.095	2.39294e-07	1.53014e-05	CG5050	CG5050		14.0235	10.7945	11.4967	14.4806	0.121847	0.328467	0.218453	0.311833	Testis
FBgn0032645	-2.73814	-0.198136	20.9169	0.0019247	0.0152871	CG15142	CG15142		1.51606	1.63377	1.46766	1.57508	0.243695	0.252667	0.0728176	0	Testis
FBgn0032647	-5.78846	1.57029	157.904	1.72929e-06	3.99463e-05	CG15143	CG15143		6.70855	5.30974	6.23757	7.26571	0.121847	0.101067	0	0.0519722	Testis
FBgn0032648	-6.80873	1.54674	151.476	2.04356e-06	4.41915e-05	CG15144	CG15144		7.76979	6.12662	6.60449	4.87768	0	0.0505333	0	0.103944	Testis
FBgn0032649	-7.85373	1.03604	220.86	4.71441e-07	2.05657e-05	CG15145	CG15145		4.69977	3.90937	4.09723	4.87768	0	0	0	0.0519722	Testis
FBgn0032650	-6.27542	1.0387	132.536	3.34436e-06	5.83565e-05	CG7094	CG7094		5.2683	3.67597	4.21953	4.31878	0	0.0505333	0	0.103944	Testis
FBgn0032654	-8.57623	0.209672	476.295	4.3795e-06	6.94033e-05	CG15147	CG15147		2.7289	2.3923	2.07919	2.38803	0	0	0	0	Testis
FBgn0032658	-7.38898	2.38706	327.085	1.06612e-07	1.2812e-05	CG5681	CG5681		13.1139	8.86902	11.0686	13.0071	0.0304618	0.0505333	0	0.103944	Testis
FBgn0032660	-6.58995	1.80298	96.2484	1.1428e-05	0.000137451	CG15150	elfless	elfless	9.28585	4.95965	7.21602	8.84079	0.0304618	0.126333	0	0	Testis
FBgn0032664	-5.61015	1.69499	158.308	1.71507e-06	3.98046e-05	CG5755	Slc25A46b	Solute carrier family 25 member 46b	7.12547	6.24332	6.17642	8.28189	0.121847	0.0758	0	0.207889	Testis
FBgn0032677	-11.0182	2.55505	1242.92	4.19749e-07	1.9698e-05	CG5790	CG5790		14.1751	11.3197	13.2701	13.4136	0	0	0	0	Testis
FBgn0032680	-3.91403	0.333617	44.6757	0.00017141	0.00152841	CG10174	Ntf-2r	Nuclear transport factor-2-related	2.19828	3.15083	2.3238	2.2356	0.0913855	0.101067	0.364088	0	Testis
FBgn0032707	-3.21957	-0.0388828	22.3741	0.00157538	0.0126009	CG10348	CG10348		1.59186	1.98386	1.77343	1.93075	0.243695	0.202133	0	0	Testis
FBgn0032740	-5.74006	1.07652	99.0549	1.00425e-05	0.000122607	CG15172	CG15172		5.72311	2.80074	4.21953	5.0301	0	0.0758	0.145635	0.0519722	Testis
FBgn0032768	-8.19436	1.38385	196.907	7.45491e-07	2.54773e-05	CG17564	CG17564		6.51904	4.95965	5.44259	5.69062	0	0	0.0728176	0	Testis
FBgn0032769	-9.30439	0.890746	661.82	1.96239e-06	4.28028e-05	CG10750	CG10750		3.90385	3.79267	4.34184	3.86149	0	0	0	0	Testis
FBgn0032771	-10.0041	1.56412	940.578	8.30714e-07	2.68714e-05	CG17349	CG17349		7.08756	6.18497	6.17642	6.40195	0	0	0	0	Testis
FBgn0032867	-5.66795	1.06001	91.4736	1.35688e-05	0.000157145	CG15475	CG15475		4.24496	4.25946	4.09723	4.9793	0	0.0252667	0.218453	0.103944	Testis
FBgn0032869	-3.6589	2.53943	39.2075	0.000266096	0.00232695	CG17470	CG17470		12.318	11.9615	10.5794	13.1596	1.2794	0.808533	0.145635	0.363805	Testis
FBgn0032878	-4.76264	0.807203	170.785	1.22603e-06	3.2566e-05	CG9316	CG9316		4.54817	3.73432	3.11879	3.04855	0.0304618	0.126333	0.145635	0.103944	Testis
FBgn0032894	-6.22705	0.646604	223.734	4.37048e-07	2.01165e-05	CG14402	CG14402		3.25952	3.85102	2.07919	3.96311	0.0304618	0.0252667	0	0.0519722	Testis
FBgn0032964	-2.85255	0.196209	19.1816	0.0024783	0.0193055	CG11630	CG11630		1.66766	1.80881	1.71227	3.09936	0.0609237	0.2274	0.655358	0.0519722	Testis
FBgn0032967	-8.11219	1.26283	263.848	2.36834e-07	1.53014e-05	CG1428	CG1428		5.79892	4.20111	4.83106	5.89386	0	0.0252667	0	0	Testis
FBgn0032968	-6.80865	0.0810493	119.7	4.84408e-06	7.38925e-05	CG11634	CG11634		2.27408	2.15891	1.58997	2.59127	0	0	0.0728176	0	Testis
FBgn0032969	-10.283	1.83554	902.349	9.19511e-07	2.81108e-05	CG2528	CG2528		9.21004	7.52699	7.03256	7.62137	0	0	0	0	Testis
FBgn0032971	-8.34727	-0.00113534	428.849	5.65508e-06	8.21481e-05	CG6691	ttm3	tiny tim 3	2.12248	2.04221	1.77343	2.2356	0	0	0	0	Testis
FBgn0032973	-5.30921	1.14615	254.435	2.66589e-07	1.59559e-05	CG6675	CG6675		5.4957	3.32588	4.58645	5.23334	0.0913855	0.101067	0.0728176	0.0519722	Testis
FBgn0033020	-5.85783	2.61539	424.244	3.70828e-08	9.34652e-06	CG10396	COX4L	Cytochrome c oxidase subunit 4-like	14.1751	11.4364	13.0255	14.8871	0.152309	0.202133	0.218453	0.103944	Testis
FBgn0033031	-1.06458	2.27839	31.4868	0.000522548	0.0044395	CG8245	CG8245		7.73189	8.81067	6.35988	6.30033	2.40649	1.86973	2.62143	4.36566	Testis
FBgn0033042	-8.7344	0.355891	394.354	6.93547e-06	9.43568e-05	CG14468	Tsp42A	Tetraspanin 42A	2.99421	2.15891	2.62956	2.89612	0	0	0	0	Testis
FBgn0033056	-9.21424	0.807038	405.442	6.48298e-06	9.01708e-05	CG7856	CG7856		4.05545	4.14276	2.69072	4.06473	0	0	0	0	Testis
FBgn0033063	-4.1115	1.48556	159.968	1.58073e-06	3.76653e-05	CG14589	CG14589		6.44324	5.13469	4.76991	6.70681	0.121847	0.176867	0.364088	0.46775	Testis
FBgn0033069	-8.16651	1.33575	179.292	1.07153e-06	3.0232e-05	CG8335	eIF3f2	eukaryotic translation initiation factor 3 subunit	5.72311	3.73432	4.95337	7.36733	0	0	0	0.0519722	Testis
FBgn0033074	-1.64933	2.72913	35.5588	0.000358548	0.00309959	CG8330	tomboy40	tomboy40	10.8019	10.3861	11.0686	12.4482	1.43171	1.99607	4.51469	3.84594	Testis
FBgn0033141	-3.9925	0.742911	349.849	7.78256e-08	1.13166e-05	CG12831	CG12831		4.05545	2.91744	3.24109	3.20098	0.121847	0.126333	0.218453	0.207889	Testis
FBgn0033168	-7.88153	-0.418781	253.297	2.03015e-05	0.000216817	CG11145	CG11145		1.59186	1.16698	1.40651	1.72751	0	0	0	0	Testis
FBgn0033174	-3.18522	2.90816	486.187	2.16253e-08	7.91206e-06	CG11125	CG11125		16.1839	13.4202	15.1047	15.5984	1.21847	1.137	1.52917	1.2993	Testis
FBgn0033177	-0.648795	4.29542	29.7808	0.000625362	0.00525786	CG11141	CG11141		27.289	29.6995	24.2165	26.7764	10.4179	10.3846	17.0393	17.4626	Testis
FBgn0033190	-1.81008	1.27441	26.8624	0.000880852	0.00726591	CG2137	Gpo2	Glycerophosphate oxidase 2	3.75224	3.67597	4.6476	4.31878	0.883393	1.08647	0.364088	1.14339	Testis
FBgn0033243	-5.05919	1.22333	191.208	8.02259e-07	2.66839e-05	CG14763	CG14763		5.68521	3.90937	4.09723	5.89386	0.0913855	0.101067	0.218453	0.0519722	Testis
FBgn0033258	-1.37734	2.81487	106.562	7.22206e-06	9.7168e-05	CG8712	CG8712		12.8865	10.0943	10.5794	11.7369	3.22895	2.4256	3.93215	4.36566	Testis
FBgn0033274	-3.27646	1.25548	31.963	0.000519337	0.00441884	CG14757	CG14757		5.4957	3.96772	4.40299	4.9793	0.578775	0.353733	0	0.415777	Testis
FBgn0033279	-8.54791	0.180813	183.101	4.59393e-05	0.00044599	CG2291	CG2291		2.00877	1.63377	2.56841	3.15017	0	0	0	0	Testis
FBgn0033280	-9.35568	0.939403	370.106	8.09284e-06	0.000105383	CG12126	CG12126		3.71434	3.26753	4.46415	4.9793	0	0	0	0	Testis
FBgn0033285	-11.204	2.73776	1061.18	6.18255e-07	2.3275e-05	CG18449	CG18449		13.7961	13.5369	14.3709	17.58	0	0	0	0	Testis
FBgn0033286	-11.9673	3.49297	1804.34	1.68307e-07	1.37868e-05	CG2127	CG2127		26.6447	22.1725	24.6445	27.2845	0	0	0	0	Testis
FBgn0033287	-4.36513	4.02274	41.3482	0.000222823	0.00196521	CG8701	CG8701		38.2804	31.9168	33.2671	35.5664	0.578775	0.176867	2.83989	2.49466	Testis
FBgn0033322	-6.78163	0.0363123	161.582	1.52173e-06	3.68702e-05	CG8584	CG8584		2.42569	1.92551	2.01804	1.98156	0	0	0	0.0519722	Testis
FBgn0033323	-8.57215	1.71385	284.108	1.81851e-07	1.37868e-05	CG12376	CG12376		8.83103	6.24332	6.05411	7.57056	0.0304618	0	0	0	Testis
FBgn0033324	-4.06939	0.000911626	27.1773	0.000868671	0.0071811	CG14744	CG14744		2.23618	1.16698	1.89573	2.43884	0.243695	0.0252667	0	0	Testis
FBgn0033330	-7.66775	0.881162	168.538	1.34497e-06	3.40506e-05	CG8746	CG8746		4.58607	3.73432	3.30224	4.06473	0	0	0.0728176	0	Testis
FBgn0033344	-4.25712	0.444871	66.8791	4.10199e-05	0.000404563	CG8252	CG8252		3.03211	2.04221	2.75187	3.04855	0.0913855	0.1516	0.145635	0	Testis
FBgn0033364	-10.7447	2.28596	965.378	7.79443e-07	2.62328e-05	CG13747	CG13747		9.96807	10.6778	9.90673	12.6007	0	0	0	0	Testis
FBgn0033369	-7.18238	0.427669	123.7	4.29777e-06	6.87479e-05	CG8197	CG8197		3.90385	2.56735	2.01804	2.69288	0	0	0.0728176	0	Testis
FBgn0033371	-4.89921	2.06708	89.7453	1.47409e-05	0.000167695	CG11778	CNT1	Concentrative nucleoside transporter 1	9.93017	8.40223	8.74483	8.63755	0.121847	0.0505333	0.582541	0.363805	Testis
FBgn0033442	-9.36083	0.944367	460.462	4.75557e-06	7.33847e-05	CG1690	CG1690		3.97965	3.38423	4.76991	4.36959	0	0	0	0	Testis
FBgn0033447	-3.64535	1.00737	113.987	5.67136e-06	8.21651e-05	CG1625	dila	dilatory	4.58607	4.08442	3.30224	4.11554	0.152309	0.353733	0.145635	0.259861	Testis
FBgn0033461	-4.59433	0.690788	122.412	4.4097e-06	6.96585e-05	CG12923	CG12923		3.71434	2.74239	2.50726	4.16635	0.0913855	0.0252667	0.145635	0.207889	Testis
FBgn0033498	-3.80467	0.582477	133.76	3.0886e-06	5.64097e-05	CG12209	CG12209		2.84261	2.97579	3.30224	2.74369	0.121847	0.0758	0.145635	0.363805	Testis
FBgn0033542	-6.83333	2.99828	208.637	6.40687e-07	2.34653e-05	CG12309	CAH13	Carbonic anhydrase 13	19.7087	17.0962	15.9608	18.0372	0.0609237	0.126333	0	0.259861	Testis
FBgn0033610	-3.49737	1.92335	158.935	1.61129e-06	3.81528e-05	CG18335	CG18335		7.20127	6.94351	7.39947	9.14565	0.731084	0.404267	0.436905	0.46775	Testis
FBgn0033623	-2.48615	-0.158187	56.1173	7.37531e-05	0.000681751	CG13202	CG13202		1.44025	1.05028	1.65112	2.03237	0.152309	0.252667	0.145635	0.259861	Testis
FBgn0033673	-0.763388	3.66443	20.3149	0.00203585	0.0161247	CG8298	CG8298		17.9653	17.0378	18.5293	18.0372	9.13855	7.8832	6.99049	8.47146	Testis
FBgn0033680	-2.31326	0.682122	23.679	0.00131993	0.0106503	CG13186	CG13186		3.14582	2.6257	2.44611	3.09936	0.182771	0.1516	0.728176	0.987471	Testis
FBgn0033687	-2.47342	0.925328	138.464	2.71194e-06	5.17826e-05	CG8407	CG8407		3.82804	3.67597	2.93533	3.40421	0.517851	0.277933	0.582541	0.623666	Testis
FBgn0033705	-8.47231	2.35888	173.313	1.29003e-06	3.30688e-05	CG13168	CG13168		14.3646	9.8026	10.3348	10.8732	0	0	0	0.103944	Testis
FBgn0033706	-8.2454	-0.0936499	348.518	9.3655e-06	0.000115704	CG13167	Vha36-2	Vacuolar H[+] ATPase 36kD subunit 2	2.04668	1.57542	1.89573	2.08317	0	0	0	0	Testis
FBgn0033748	-3.4802	2.44332	221.236	4.56279e-07	2.0533e-05	CG8821	vis	vismay	12.2043	10.4444	9.41751	12.2958	0.883393	0.656933	0.509723	0.987471	Testis
FBgn0033749	-0.98635	3.10074	54.0687	8.40377e-05	0.000771162	CG8819	achi	achintya	12.6212	11.5531	13.637	13.1088	4.35604	4.95226	5.17005	5.61299	Testis
FBgn0033770	-4.75889	0.204151	64.0735	4.82075e-05	0.00046494	CG12442	wuc	Wake-up-call	2.23618	1.63377	2.93533	2.38803	0	0.0252667	0.145635	0.155917	Testis
FBgn0033794	-5.76521	1.3406	92.531	1.31911e-05	0.000153765	CG13326	CG13326		5.95052	5.48479	4.89221	5.28415	0.0304618	0	0.145635	0.207889	Testis
FBgn0033815	-1.32335	0.164921	32.6098	0.000466282	0.00398536	CG4676	CG4676		1.55396	1.69212	1.83458	1.57508	0.426466	0.3032	0.800993	0.675638	Testis
FBgn0033818	-6.92678	1.66024	169.523	1.32567e-06	3.37124e-05	CG4712	CG4712		7.73189	7.2936	6.11527	6.40195	0	0.0505333	0	0.103944	Testis
FBgn0033819	-6.72383	1.73394	248.437	3.04448e-07	1.65027e-05	CG4714	CG4714		8.45201	6.30167	6.9714	7.2149	0.0913855	0.0252667	0	0.0519722	Testis
FBgn0033834	-6.93447	2.89267	526.172	1.64075e-08	7.29356e-06	CG4744	CG4744		17.0556	15.6375	16.3278	16.6654	0.0304618	0.101067	0.145635	0.155917	Testis
FBgn0033848	-8.82522	0.438546	521.675	3.50799e-06	5.96616e-05	CG13330	CG13330		2.5773	2.97579	2.75187	3.09936	0	0	0	0	Testis
FBgn0033860	-6.05337	1.36911	128.54	3.77763e-06	6.28239e-05	CG18369	S-Lap5	Sperm-Leucylaminopeptidase 5	5.3062	5.83488	4.03608	6.96085	0	0.0505333	0.0728176	0.155917	Testis
FBgn0033862	-7.38835	0.579278	170.447	1.27653e-06	3.29638e-05	CG6209	CG6209		4.39656	2.3923	2.44611	3.30259	0	0.0252667	0	0	Testis
FBgn0033864	-2.42957	1.43095	14.1622	0.0057459	0.0425948	CG18368	CG18368		5.04089	4.43451	5.74835	4.52201	0.121847	0.2274	1.60199	1.40325	Testis
FBgn0033865	-9.30929	0.897681	364.567	8.39498e-06	0.000108077	CG6220	CG6220		4.73768	2.97579	3.73031	4.4712	0	0	0	0	Testis
FBgn0033868	-11.9935	5.08954	629.404	9.07986e-09	6.16818e-06	CG13340	S-Lap7	Sperm-Leucylaminopeptidase 7	88.424	65.4673	62.8649	89.8306	0	0.0252667	0	0	Testis
FBgn0033885	-1.92847	0.237364	26.7926	0.000885882	0.00729678	CG6646	DJ-1alpha	DJ-1alpha	2.27408	1.69212	1.83458	1.93075	0.213233	0.176867	0.728176	0.675638	Testis
FBgn0033888	-4.80672	2.02027	120.997	4.79332e-06	7.36664e-05	CG18568	CG18568		8.60362	8.28553	7.70524	9.85697	0.0913855	0.126333	0.582541	0.311833	Testis
FBgn0033933	-6.67106	-0.0635566	119.171	4.90875e-06	7.43325e-05	CG10104	CG10104		2.38779	1.28367	2.26265	1.77832	0	0	0	0.0519722	Testis
FBgn0033952	-6.85183	0.101877	145.015	2.32607e-06	4.7365e-05	CG10143	Adgf-E	Adenosine deaminase-related growth factor E	2.7289	2.15891	1.58997	2.28641	0	0	0	0.0519722	Testis
FBgn0033953	-11.9819	3.50744	1607.58	2.23405e-07	1.4905e-05	CG12861	CG12861		25.9625	24.3898	22.1984	29.2661	0	0	0	0	Testis
FBgn0033954	-8.92434	3.30371	242.194	3.63839e-07	1.79742e-05	CG12860	CG12860		25.4318	19.1968	21.0977	22.4068	0	0	0.0728176	0.103944	Testis
FBgn0033955	-8.78937	0.407339	527.991	3.40653e-06	5.89876e-05	CG12866	CG12866		3.18372	2.68404	2.50726	2.74369	0	0	0	0	Testis
FBgn0033960	-1.11603	2.1995	61.5349	5.32464e-05	0.00050622	CG10151	CG10151		7.80769	6.36002	6.91025	6.75762	2.04094	1.92027	2.83989	3.53411	Testis
FBgn0033963	-5.57791	1.70701	214.63	5.27963e-07	2.18798e-05	CG12857	CG12857		9.24794	5.65983	6.11527	7.01166	0.0913855	0.0505333	0.0728176	0.259861	Testis
FBgn0033969	-9.43372	1.01551	664.776	1.94114e-06	4.26518e-05	CG10202	Pgm2b	Phosphoglucomutase 2b	4.85138	3.96772	4.09723	4.4712	0	0	0	0	Testis
FBgn0033983	-1.00468	2.12244	35.8173	0.00034256	0.00296816	CG10253	ADPS	Alkyldihydroxyacetonephosphate synthase	7.50448	5.95158	5.50374	6.75762	2.40649	2.09713	2.18453	3.43016	Testis
FBgn0033990	-0.834991	2.24324	39.8404	0.000240072	0.0021075	CG10265	CG10265		6.78435	6.47672	6.60449	7.01166	2.49787	2.24873	3.78651	3.53411	Testis
FBgn0034007	-1.39155	0.849811	14.3944	0.00543107	0.040505	CG8102	ND-51L2	NADH dehydrogenase (ubiquinone) 51 kDa subunit-like	3.10792	2.6257	2.99648	2.43884	0.33508	0.581133	1.60199	1.09142	Testis
FBgn0034062	-0.666789	2.527	22.9786	0.00140687	0.0113168	CG8388	CG8388		8.33831	7.93544	7.58293	7.62137	3.53357	2.82987	3.78651	5.76891	Testis
FBgn0034082	-7.52616	3.1433	262.304	2.68568e-07	1.59559e-05	CG10734	CG10734		21.2248	18.0881	19.3854	19.8664	0.121847	0.0252667	0	0.155917	Testis
FBgn0034097	-9.41445	0.997511	362.374	8.51902e-06	0.000108932	CG3687	CG3687		4.54817	4.02607	3.17994	5.38577	0	0	0	0	Testis
FBgn0034099	-6.03935	0.522994	90.6343	1.38027e-05	0.000159258	CG15708	CG15708		3.18372	2.15891	2.99648	3.55664	0	0	0.0728176	0.103944	Testis
FBgn0034105	-9.22287	0.815652	406.973	6.42377e-06	8.96168e-05	CG7755	CG7755		4.81348	3.38423	3.79147	3.04855	0	0	0	0	Testis
FBgn0034121	-11.2672	2.80044	1754.48	1.80284e-07	1.37868e-05	CG6262	CG6262		17.2451	14.6455	15.4716	14.7347	0	0	0	0	Testis
FBgn0034122	-8.62938	0.25648	192.748	4.04466e-05	0.000399953	CG15711	CG15711		2.00877	2.15891	2.14034	3.60745	0	0	0	0	Testis
FBgn0034127	-10.8439	2.38436	686.558	1.79408e-06	4.04543e-05	CG7848	CG7848		14.4404	9.27746	10.396	12.1434	0	0	0	0	Testis
FBgn0034129	-5.57319	0.0773875	145.846	2.24046e-06	4.67561e-05	CG15925	Parp16	Poly(ADP-ribose) polymerase family member 16	2.08458	1.63377	2.44611	2.33722	0	0.0252667	0.0728176	0.0519722	Testis
FBgn0034132	-13.0995	4.61854	2058.73	1.2178e-07	1.2812e-05	CG4439	S-Lap8	Sperm-Leucylaminopeptidase 8	59.6189	52.9224	47.0876	61.4791	0	0	0	0	Testis
FBgn0034144	-10.5443	4.38837	670.538	6.78412e-09	6.16818e-06	CG5089	CG5089		50.5984	41.7194	46.1703	49.6405	0	0.0252667	0	0.0519722	Testis
FBgn0034156	-6.78231	0.0233428	145.337	2.29875e-06	4.72895e-05	CG5348	CG5348		2.31199	1.40037	2.2015	2.33722	0.0304618	0	0	0	Testis
FBgn0034173	-7.97941	1.87809	146.287	2.43498e-06	4.86144e-05	CG9010	CG9010		9.02054	6.41837	7.21602	9.50131	0	0	0	0.103944	Testis
FBgn0034175	-1.27713	1.21244	37.4906	0.000294322	0.00256193	CG9001	ste24b	ste24b prenyl protease type I	3.90385	2.74239	3.54686	4.01392	0.913855	0.934866	1.09226	1.76705	Testis
FBgn0034205	-8.63324	1.76614	330.747	9.94969e-08	1.2812e-05	CG10950	CG10950		8.79313	6.71011	6.78795	7.51975	0	0.0252667	0	0	Testis
FBgn0034251	-1.58915	2.38797	87.5256	1.49241e-05	0.000168931	CG11423	ND-51L1	NADH dehydrogenase (ubiquinone) 51 kDa subunit-like	9.36165	8.34388	8.31676	8.84079	1.64494	1.92027	3.20397	2.49466	Testis
FBgn0034263	-8.30791	1.45682	264.06	2.3857e-07	1.53014e-05	CG10934	CG10934		6.10213	4.72625	6.29873	6.70681	0.0304618	0	0	0	Testis
FBgn0034274	-6.25053	0.702337	66.3225	4.36213e-05	0.000427247	CG10931	CG10931		4.43447	2.97579	2.2015	4.01392	0	0	0	0.155917	Testis
FBgn0034278	-9.64163	1.21337	526.751	3.42612e-06	5.90872e-05	CG14488	CG14488		4.47237	4.7846	4.70876	6.0971	0	0	0	0	Testis
FBgn0034352	-7.79462	0.981794	176.83	1.12137e-06	3.08298e-05	CG17669	CG17669		5.4578	3.26753	3.3634	4.77606	0	0	0	0.0519722	Testis
FBgn0034363	-3.9402	-0.0672964	132.524	3.19825e-06	5.71253e-05	CG5327	CG5327		1.89507	1.63377	1.65112	2.13398	0.0304618	0.101067	0.0728176	0.155917	Testis
FBgn0034383	-7.74967	-0.533881	262.46	1.86291e-05	0.000202192	CG17821	CG17821		1.47816	1.34202	1.0396	1.52427	0	0	0	0	Testis
FBgn0034411	-5.56867	0.386286	174.678	1.12534e-06	3.08298e-05	CG18605	CG18605		3.10792	2.10056	2.56841	2.94693	0.0304618	0.0252667	0	0.103944	Testis
FBgn0034416	-10.9102	4.0286	541.479	1.64704e-08	7.29356e-06	CG15109	CG15109		40.5545	35.2427	31.3713	39.4279	0	0	0	0.0519722	Testis
FBgn0034423	-11.3713	2.90356	858.298	1.05108e-06	2.9953e-05	CG7229	tbrd-2	testis-specifically expressed bromodomain containing protein-2	21.528	13.9454	16.2055	15.0903	0	0	0	0	Testis
FBgn0034435	-8.86213	4.69707	104.66	8.41149e-06	0.000108167	CG9975	fest	wurstfest	59.0504	54.031	54.6093	65.0865	0	0	0.0728176	0.415777	Testis
FBgn0034459	-4.14649	1.77116	203.733	6.25669e-07	2.3275e-05	CG16716	TTLL6A	Tubulin tyrosine ligase-like 6A	8.22461	6.47672	6.91025	6.80842	0.426466	0.252667	0.29127	0.207889	Testis
FBgn0034461	-7.47697	0.679073	208.335	5.80981e-07	2.26871e-05	CG15124	CG15124		3.60063	3.32588	3.11879	3.50583	0	0	0	0.0519722	Testis
FBgn0034463	-4.25831	-0.109611	87.9946	1.48938e-05	0.000168757	CG15125	CG15125		1.81927	1.86716	1.89573	1.62589	0.0913855	0.0252667	0	0.155917	Testis
FBgn0034464	-10.1353	1.69148	614.699	2.35038e-06	4.77743e-05	CG11018	CG11018		7.58028	5.83488	6.60449	8.23108	0	0	0	0	Testis
FBgn0034467	-7.56349	2.77379	141.42	2.76256e-06	5.21347e-05	CG15128	CG15128		16.2976	13.5953	14.3097	16.4114	0.152309	0.0252667	0	0	Testis
FBgn0034472	-11.2113	2.7453	1211.59	4.46844e-07	2.02724e-05	CG8517	CG8517		15.3122	13.7703	13.3924	17.1735	0	0	0	0	Testis
FBgn0034477	-7.43122	0.638986	154.215	1.88066e-06	4.18245e-05	CG13872	CG13872		4.69977	3.32588	2.69072	2.43884	0	0	0	0.0519722	Testis
FBgn0034478	-8.51114	0.149091	335.383	1.02815e-05	0.000125121	CG10822	CG10822		2.34989	2.04221	1.95689	2.7945	0	0	0	0	Testis
FBgn0034502	-6.07885	0.916874	126.357	3.99407e-06	6.56532e-05	CG13871	CG13871		4.77558	3.15083	3.91377	4.06473	0.0304618	0	0.145635	0.0519722	Testis
FBgn0034505	-6.92541	1.28015	111.84	6.57472e-06	9.09396e-05	CG16739	CG16739		4.66187	4.60955	5.50374	6.14791	0	0.0758	0	0	Testis
FBgn0034506	-5.05103	0.566854	141.693	2.53727e-06	4.94556e-05	CG13870	CG13870		3.56273	2.6257	3.4857	2.54046	0.0913855	0.0758	0	0.0519722	Testis
FBgn0034513	-8.05302	-0.263947	234.39	2.44886e-05	0.000253884	CG13423	CG13423		2.16038	1.34202	1.40651	1.72751	0	0	0	0	Testis
FBgn0034532	-2.91333	1.72561	80.1031	2.11712e-05	0.000224205	CG13436	CG13436		7.01176	6.36002	6.11527	6.19872	0.456928	0.555866	0.364088	1.35128	Testis
FBgn0034546	-10.054	1.61285	753.499	1.42914e-06	3.53916e-05	CG13442	CG13442		7.80769	7.2936	5.93181	5.79224	0	0	0	0	Testis
FBgn0034554	-6.30665	1.42897	75.407	2.76155e-05	0.000283196	CG15227	CAH14	Carbonic anhydrase 14	7.65609	4.20111	5.38144	5.84305	0	0	0.145635	0.155917	Testis
FBgn0034560	-8.78273	0.403364	276.851	1.63707e-05	0.000182036	CG9235	CAH15	Carbonic anhydrase 15	3.67644	2.33395	2.14034	2.89612	0	0	0	0	Testis
FBgn0034566	-6.07317	2.35247	269.929	2.23256e-07	1.4905e-05	CG9313	CG9313		10.1197	9.5692	12.9032	11.8893	0.0913855	0.0505333	0.29127	0.155917	Testis
FBgn0034592	-8.74837	0.366404	284.22	1.53614e-05	0.000172504	CG9406	CG9406		2.19828	2.45065	2.62956	3.50583	0	0	0	0	Testis
FBgn0034595	-4.71989	1.34371	295.227	1.50196e-07	1.31872e-05	CG15657	CG15657		5.04089	5.42644	4.5253	6.24952	0.121847	0.101067	0.29127	0.155917	Testis
FBgn0034601	-6.08112	1.5216	131.84	3.46706e-06	5.92221e-05	CG4286	CG4286		5.87472	5.30974	5.44259	8.07865	0.0304618	0.126333	0	0.0519722	Testis
FBgn0034655	-2.58609	0.338185	45.4823	0.000155953	0.00139938	CG10307	CG10307		2.6152	1.75046	2.07919	2.64208	0.456928	0.252667	0.145635	0.207889	Testis
FBgn0034658	-8.80594	0.423778	386.427	7.28663e-06	9.75738e-05	CG7975	Grx1t	Glutaredoxin 1, testis-specific	3.48693	2.3923	2.50726	2.84531	0	0	0	0	Testis
FBgn0034659	-11.3131	2.84599	1099.43	5.66893e-07	2.25759e-05	CG4021	CG4021		18.3822	14.3538	13.6982	17.6308	0	0	0	0	Testis
FBgn0034667	-4.6288	0.0676338	163.764	1.43795e-06	3.54548e-05	CG13493	comr	cookie monster	2.27408	1.63377	2.38495	1.98156	0.0609237	0.0252667	0.145635	0.0519722	Testis
FBgn0034684	-8.70273	0.325504	481.734	4.25997e-06	6.83403e-05	CG13501	CG13501		2.6152	2.45065	2.44611	2.94693	0	0	0	0	Testis
FBgn0034713	-9.38559	0.968053	538.262	3.25013e-06	5.76885e-05	CG11291	CG11291		4.09335	3.61763	4.76991	4.31878	0	0	0	0	Testis
FBgn0034737	-5.99309	1.31468	64.9761	4.69033e-05	0.000453906	CG11362	CG11362		5.3441	3.96772	5.19798	6.70681	0.0304618	0	0	0.259861	Testis
FBgn0034739	-7.02277	2.04184	136.303	3.16903e-06	5.68721e-05	CG3927	CG3927		9.09634	7.64369	8.50022	10.7715	0	0.0505333	0	0.155917	Testis
FBgn0034740	-8.5529	1.68863	298.973	1.47911e-07	1.31872e-05	CG3875	nsr	novel spermatogenesis regulator	8.79313	6.06827	6.11527	7.2149	0	0.0252667	0	0	Testis
FBgn0034745	-4.92038	1.64545	53.0087	9.55868e-05	0.0008722	CG4329	CG4329		7.08756	5.54314	6.8491	6.91004	0.0304618	0.0252667	0.509723	0.311833	Testis
FBgn0034776	-3.56238	-0.073277	27.4204	0.000844815	0.00699408	CG13527	CG13527		2.00877	1.34202	1.34536	2.38803	0	0.0505333	0.145635	0.363805	Testis
FBgn0034800	-1.68377	1.48993	64.1045	4.6031e-05	0.000446226	CG3788	CG3788		5.04089	3.96772	4.40299	5.28415	1.24894	0.960133	1.31072	0.987471	Testis
FBgn0034816	-4.69298	2.62495	106.177	7.97897e-06	0.00010438	CG3085	CG3085		15.388	12.3116	11.4355	13.7185	0.548313	0.3032	0.582541	0.103944	Testis
FBgn0034820	-7.9307	-0.37334	168.551	5.41698e-05	0.000514568	CG13538	CG13538		1.81927	1.10863	1.22305	1.93075	0	0	0	0	Testis
FBgn0034822	-9.64773	1.22059	395.752	6.87602e-06	9.40745e-05	CG9873	RpL37b	Ribosomal protein L37b	5.3441	4.02607	4.40299	6.35114	0	0	0	0	Testis
FBgn0034824	-8.92195	2.0472	360.877	7.14923e-08	1.08571e-05	CG3219	Klp59C	Kinesin-like protein at 59C	10.9914	8.92737	8.37792	8.18027	0	0.0252667	0	0	Testis
FBgn0034825	-8.80456	0.421556	384.064	7.39617e-06	9.83439e-05	CG3215	Gpdh2	Glycerol-3-phosphate dehydrogenase 2	3.03211	2.85909	2.14034	3.20098	0	0	0	0	Testis
FBgn0034826	-10.0355	1.59519	517.405	3.57903e-06	6.06777e-05	CG13544	CG13544		7.58028	5.36809	5.74835	7.67218	0	0	0	0	Testis
FBgn0034827	-10.8598	2.3994	1271.14	3.97274e-07	1.88531e-05	CG12192	Klp59D	Kinesin-like protein at 59D	13.1518	12.6617	10.824	10.2634	0	0	0	0	Testis
FBgn0034829	-10.163	1.71903	587.477	2.62524e-06	5.06219e-05	CG9899	CG9899		8.83103	5.77653	6.91025	7.31652	0	0	0	0	Testis
FBgn0034833	-8.17136	-0.159443	256.863	1.96265e-05	0.000210692	CG13539	CG13539		2.23618	1.40037	1.95689	1.62589	0	0	0	0	Testis
FBgn0034834	-4.79142	0.483907	36.0916	0.000349862	0.00302911	CG3162	LS2	Large Subunit 2	3.18372	2.45065	3.60801	2.08317	0	0	0.29127	0.155917	Testis
FBgn0034835	-9.23534	0.826624	380.04	7.58805e-06	0.000100659	CG3092	CG3092		4.32076	2.80074	4.03608	3.96311	0	0	0	0	Testis
FBgn0034837	-6.37527	2.16054	71.6841	3.30927e-05	0.000333337	CG9871	RpL22-like	Ribosomal protein L22-like	11.3325	6.47672	9.84558	11.178	0.0304618	0	0.364088	0.103944	Testis
FBgn0034838	-6.24194	0.212617	172.775	1.1736e-06	3.17686e-05	CG12782	CG12782		2.691	2.21725	1.89573	2.69288	0	0.0252667	0	0.0519722	Testis
FBgn0034839	-5.48407	0.818313	101.98	8.84623e-06	0.000111628	CG13540	CG13540		3.37323	3.32588	4.09723	3.96311	0.121847	0	0.0728176	0.0519722	Testis
FBgn0034840	-10.7773	3.88498	573.542	1.27014e-08	6.94916e-06	CG3124	CG3124		36.12	29.6412	28.8641	37.8528	0.0304618	0	0	0	Testis
FBgn0034841	-7.86801	-0.43163	374.25	7.87668e-06	0.00010328	CG13541	CG13541		1.47816	1.45872	1.34536	1.57508	0	0	0	0	Testis
FBgn0034842	-8.93182	0.541647	356.293	8.87666e-06	0.000111628	CG9868	Prosbeta5R1	Proteasome beta5 subunit-related 1	3.67644	2.85909	2.3238	3.40421	0	0	0	0	Testis
FBgn0034844	-8.24766	2.62184	134.973	3.28679e-06	5.79142e-05	CG9861	CG9861		16.2597	11.8448	13.209	13.2612	0	0	0	0.155917	Testis
FBgn0034850	-6.28686	0.238148	203.466	6.28815e-07	2.33073e-05	CG9875	CG9875		2.16038	2.2756	2.38495	2.89612	0.0304618	0.0252667	0	0	Testis
FBgn0034863	-8.42398	0.0678177	288.967	1.4757e-05	0.00016771	CG12227	SkpF	SKP1-related F	1.97087	2.74239	1.65112	2.28641	0	0	0	0	Testis
FBgn0034882	-9.4691	1.04818	361.41	8.57435e-06	0.00010927	CG5398	Eglp1	Entomoglyceroporin 1	4.28286	3.32588	4.76991	5.38577	0	0	0	0	Testis
FBgn0034907	-4.35355	2.28247	26.6804	0.000920104	0.00756219	CG5539	CG5539		12.2043	8.63562	9.0506	11.0764	0.0609237	0.0252667	0.582541	1.24733	Testis
FBgn0034937	-1.97962	1.70486	51.4978	9.99504e-05	0.000907636	CG16783	fzr2	fizzy-related 2	6.67065	4.55121	5.19798	6.40195	1.18801	0.9854	0.655358	1.66311	Testis
FBgn0034957	-7.26628	1.6534	148.891	2.21509e-06	4.64422e-05	CG3121	CG3121		7.50448	4.9013	5.99296	8.8916	0.0304618	0	0	0.103944	Testis
FBgn0034998	-5.13225	1.33147	116.137	5.47025e-06	8.00562e-05	CG13577	CG13577		5.83682	4.08442	5.62605	5.74143	0.182771	0.101067	0	0.103944	Testis
FBgn0035003	-6.00423	-0.0114264	102.456	8.64292e-06	0.000109897	CG15873	CG15873		2.19828	1.86716	2.07919	1.87994	0.0609237	0	0	0	Testis
FBgn0035005	-9.30299	0.892269	395.109	6.90326e-06	9.422e-05	CG3483	CG3483		5.00299	3.20918	3.4857	4.16635	0	0	0	0	Testis
FBgn0035007	-5.93396	1.30455	102.11	9.13318e-06	0.000113927	CG3492	CG3492		5.3062	4.72625	5.01452	5.99548	0.0609237	0	0.218453	0.0519722	Testis
FBgn0035008	-7.26353	1.62569	199.76	7.05784e-07	2.44882e-05	CG3494	CG3494		7.54238	5.89323	5.62605	7.7738	0	0.0505333	0	0.0519722	Testis
FBgn0035009	-5.69446	0.206673	86.2812	1.63162e-05	0.000181681	CG16837	CG16837		2.50149	2.04221	2.07919	2.74369	0	0	0.0728176	0.103944	Testis
FBgn0035014	-7.87588	-0.424361	352.022	9.14067e-06	0.000113927	CG13581	CG13581		1.55396	1.69212	1.28421	1.37185	0	0	0	0	Testis
FBgn0035034	-5.63476	0.481004	139.595	2.69659e-06	5.15763e-05	CG3565	CG3565		2.5773	3.09249	2.93533	2.94693	0.0304618	0	0.0728176	0.103944	Testis
FBgn0035036	-0.590496	3.04357	17.8034	0.00298699	0.0230466	CG4707	CG4707		11.9389	12.3116	10.5794	9.55212	4.50835	4.169	7.20894	7.89977	Testis
FBgn0035047	-2.07995	4.45867	154.084	1.81142e-06	4.07641e-05	CG3691	Pof	Painting of fourth	44.0035	37.5183	36.8751	41.6635	7.79823	5.28073	6.33513	10.7582	Testis
FBgn0035078	-3.0257	1.28981	118.511	4.86148e-06	7.4012e-05	CG2857	Tpc2	Thiamine pyrophosphate carrier protein 2	4.96508	4.20111	5.32028	4.4712	0.304618	0.505333	0.29127	0.675638	Testis
FBgn0035138	-4.46422	0.261055	176.615	1.0791e-06	3.03419e-05	CG13884	CG13884		2.6531	2.15891	2.14034	2.59127	0.0913855	0.0252667	0.0728176	0.155917	Testis
FBgn0035139	-2.25203	0.389969	45.1815	0.000157047	0.00140808	CG13891	CG13891		2.6531	1.98386	1.77343	2.64208	0.152309	0.328467	0.582541	0.519722	Testis
FBgn0035143	-5.19136	2.4089	90.8618	1.40937e-05	0.000161792	CG12169	Ppm1	Ppm1	12.4696	9.86095	11.5579	11.8893	0.0304618	0.1516	0.364088	0.571694	Testis
FBgn0035151	-1.1621	2.12405	25.7337	0.00099264	0.00812303	CG17129	CG17129		6.74645	5.71818	7.82754	6.35114	2.52833	2.4256	1.96607	2.13086	Testis
FBgn0035161	-6.96575	1.71648	130.607	3.71405e-06	6.22227e-05	CG13898	CG13898		8.1488	6.24332	6.42103	7.7738	0	0.0252667	0	0.155917	Testis
FBgn0035168	-3.74658	1.61973	277.161	1.91687e-07	1.37868e-05	CG13889	cep290	cep290	5.60941	6.18497	6.23757	7.01166	0.274157	0.252667	0.364088	0.623666	Testis
FBgn0035196	-8.05314	1.95647	221.031	4.83963e-07	2.08044e-05	CG9129	CG9129		9.09634	7.52699	6.9714	10.4159	0.0304618	0	0.0728176	0	Testis
FBgn0035217	-8.72392	0.348274	278.402	1.61506e-05	0.000180295	CG9169	FucTD	alpha1,3-fucosyltransferase D	3.44903	2.10056	2.2015	2.84531	0	0	0	0	Testis
FBgn0035218	-6.71255	1.16401	103.122	8.85375e-06	0.000111628	CG9173	CG9173		5.23039	4.72625	3.30224	5.89386	0.0304618	0	0.145635	0	Testis
FBgn0035263	-9.19071	0.784531	315.725	1.19051e-05	0.000142111	CG12035	CG12035		3.75224	3.38423	2.75187	4.77606	0	0	0	0	Testis
FBgn0035268	-0.98497	4.4455	67.6975	3.78753e-05	0.000376826	CG8001	CG8001		33.3153	29.9913	32.6555	34.1946	13.7078	10.0309	13.981	14.0325	Testis
FBgn0035273	-5.5805	0.657482	219.691	4.68714e-07	2.05657e-05	CG12020	CG12020		3.52483	3.26753	3.11879	3.25179	0.0304618	0.0505333	0	0.103944	Testis
FBgn0035299	-7.99243	-0.322272	268.41	1.76453e-05	0.000193552	CG11815	CG11815		1.66766	1.86716	1.71227	1.16861	0	0	0	0	Testis
FBgn0035316	-9.51455	1.09217	814.241	1.18232e-06	3.19281e-05	CG15878	CG15878		4.77558	4.6679	4.34184	4.62363	0	0	0	0	Testis
FBgn0035380	-9.72429	1.29494	310.09	1.28461e-05	0.0001505	CG9970	CG9970		6.44324	3.55928	5.01452	6.19872	0	0	0	0	Testis
FBgn0035384	-9.79968	1.36626	916.959	8.84068e-07	2.75708e-05	CG2113	CG2113		5.87472	5.71818	5.25913	5.58901	0	0	0	0	Testis
FBgn0035426	-5.96939	-0.0150976	82.808	1.89442e-05	0.000205024	CG12078	CG12078		2.46359	1.80881	1.65112	2.03237	0	0	0	0.103944	Testis
FBgn0035455	-8.4315	2.31891	155.688	1.92912e-06	4.24856e-05	CG10862	CG10862		12.7728	8.16883	9.41751	13.6168	0	0	0	0.103944	Testis
FBgn0035461	-1.21344	3.12691	38.6665	0.00026643	0.00232808	CG10855	ntc	nutcracker	14.6678	14.8206	12.4751	12.7023	3.04618	3.20887	5.53414	7.53597	Testis
FBgn0035491	-8.98954	2.15567	202.579	7.07927e-07	2.44882e-05	CG11591	Dpy-30L2	Dpy-30-like 2	10.8019	8.98571	6.91025	12.5499	0	0	0.0728176	0	Testis
FBgn0035497	-1.28118	5.56254	83.7332	1.75484e-05	0.000192862	CG14995	CG14995		72.9981	76.2619	77.4804	75.1975	24.2781	23.7001	22.6463	25.7262	Testis
FBgn0035568	-10.2243	1.77874	581.846	2.6877e-06	5.15763e-05	CG18418	CG18418		9.28585	6.06827	6.91025	7.82461	0	0	0	0	Testis
FBgn0035571	-5.83845	3.24122	143.343	2.62688e-06	5.06219e-05	CG12493	CG12493		24.1432	16.3377	20.6085	21.8987	0.182771	0.0758	0.29127	0.72761	Testis
FBgn0035581	-5.40671	2.75298	303.302	1.42609e-07	1.31872e-05	CG17150	Dnah3	dynein, axonemal, heavy chain 3	13.2655	15.6375	15.2882	14.5314	0.274157	0.1516	0.145635	0.519722	Testis
FBgn0035584	-5.74986	0.529995	109.731	6.7176e-06	9.25772e-05	CG17030	CG17030		3.37323	2.91744	2.50726	3.20098	0	0.0758	0	0.0519722	Testis
FBgn0035585	-7.84659	1.05113	171.195	1.26768e-06	3.29104e-05	CG12027	ATPsynCF6L	ATP synthase, coupling factor 6-like	5.15459	3.73432	3.97492	4.87768	0	0	0.0728176	0	Testis
FBgn0035598	-9.81246	2.92913	407.556	4.65368e-08	9.59674e-06	CG4669	CG4669		21.2248	15.229	13.6982	17.7832	0.0304618	0	0	0	Testis
FBgn0035608	-6.80238	3.72547	145.005	2.51632e-06	4.93104e-05	CG10630	blanks	blanks	33.429	20.9472	28.1302	34.8043	0.121847	0.0758	0.0728176	0.623666	Testis
FBgn0035638	-6.93711	0.85049	121.012	4.71762e-06	7.30973e-05	CG10541	Tektin-C	Tektin C	3.94175	2.91744	3.54686	4.87768	0.0609237	0	0	0	Testis
FBgn0035647	-5.98708	0.00744681	92.8318	1.24194e-05	0.000147189	CG10486	CG10486		2.7289	1.28367	2.38495	1.6767	0.0304618	0	0.0728176	0	Testis
FBgn0035657	-8.66006	0.290638	194.427	3.97149e-05	0.000393059	CG10478	alphaKap4	alpha Karyopherin-4	3.75224	1.92551	2.01804	2.43884	0	0	0	0	Testis
FBgn0035691	-1.08527	2.02763	19.2576	0.00238516	0.0186056	CG7386	CG7386		6.06423	6.41837	4.58645	7.41813	2.10187	2.47613	2.40298	1.81903	Testis
FBgn0035693	-3.63715	2.8113	71.2778	3.37701e-05	0.000339557	CG8219	CG8219		14.7057	12.6033	16.0832	14.379	0.365542	0.429533	1.38353	1.871	Testis
FBgn0035709	-10.609	2.15322	1194.7	4.62479e-07	2.05657e-05	CG10124	eIF4E4	eukaryotic translation initiation factor 4E4	9.96807	10.3277	8.68368	10.3651	0	0	0	0	Testis
FBgn0035724	-5.51099	1.70823	72.7036	3.14666e-05	0.000319922	CG10064	CG10064		8.41411	6.88516	5.50374	7.2149	0	0.0505333	0.218453	0.311833	Testis
FBgn0035727	-4.96924	1.73844	302.528	1.36658e-07	1.31872e-05	CG10063	CG10063		8.0351	5.95158	6.05411	8.28189	0.121847	0.101067	0.218453	0.311833	Testis
FBgn0035730	-10.2235	1.77711	934.969	8.42966e-07	2.69322e-05	CG17744	CG17744		8.1867	6.76846	7.39947	7.72299	0	0	0	0	Testis
FBgn0035776	-8.26139	3.29935	273.257	2.29786e-07	1.5028e-05	CG8564	CG8564		24.4843	20.1303	18.5904	24.5408	0.0609237	0	0.145635	0.0519722	Testis
FBgn0035782	-8.97757	0.583123	530.87	3.36164e-06	5.84236e-05	CG14835	CG14835		3.37323	3.15083	2.69072	3.45502	0	0	0	0	Testis
FBgn0035799	-6.17033	1.17668	112.462	6.29282e-06	8.84426e-05	CG14838	CG14838		5.72311	4.25946	4.5253	4.82687	0.0304618	0.101067	0	0	Testis
FBgn0035800	-6.82291	2.13197	130.303	3.74624e-06	6.26511e-05	CG7716	CG7716		10.8019	9.10241	8.011	10.4667	0.0304618	0	0.0728176	0.207889	Testis
FBgn0035823	-6.32664	2.56093	386.806	5.46439e-08	1.01295e-05	CG8277	eIF4E5	eukaryotic translation initiation factor 4E5	13.7203	10.7362	12.7198	14.5314	0.0609237	0.0758	0.145635	0.259861	Testis
FBgn0035852	-6.0008	1.96981	260.516	2.51284e-07	1.53602e-05	CG7387	CG7387		9.77856	7.4103	7.70524	9.09484	0.0304618	0.101067	0.0728176	0.207889	Testis
FBgn0035855	-9.13325	0.729915	465.884	4.62185e-06	7.19082e-05	CG7366	CG7366		3.67644	3.44258	2.87418	4.11554	0	0	0	0	Testis
FBgn0035857	-9.43316	1.01488	535.121	3.29686e-06	5.79737e-05	CG8006	CG8006		5.00299	3.61763	4.58645	4.16635	0	0	0	0	Testis
FBgn0035861	-8.35156	0.00370183	237.042	2.38319e-05	0.00024797	CG7213	CG7213		2.31199	1.45872	1.95689	2.43884	0	0	0	0	Testis
FBgn0035907	-0.652718	3.64533	13.7708	0.00606586	0.0447327	CG6662	GstO1	Glutathione S transferase O1	19.7466	14.2955	14.9824	19.5107	5.87913	7.32733	10.777	11.0181	Testis
FBgn0035915	-10.4566	5.43611	308.011	1.45451e-07	1.31872e-05	CG6372	S-Lap1	Sperm-Leucylaminopeptidase 1	108.701	87.4648	84.6353	109.189	0.0913855	0	0	0.103944	Testis
FBgn0035924	-5.16165	0.310542	248.476	2.92059e-07	1.63925e-05	CG6576	CG6576		2.8047	2.80074	1.83458	2.64208	0.0304618	0.0252667	0.0728176	0.103944	Testis
FBgn0035942	-0.918709	3.46662	81.1183	1.97005e-05	0.000211194	CG5660	ValRS-m	Valyl-tRNA synthetase, mitochondrial	15.2743	17.9131	15.1047	16.5638	6.18375	5.93766	7.13612	7.69188	Testis
FBgn0035952	-4.30674	1.978	183.941	9.47156e-07	2.84951e-05	CG5280	CG5280		9.17214	7.1769	7.33832	9.39969	0.426466	0.277933	0.145635	0.363805	Testis
FBgn0035955	-3.8859	1.2769	105.359	7.77604e-06	0.000102434	CG5194	CG5194		5.98842	4.08442	3.97492	5.63981	0.396004	0.101067	0.218453	0.311833	Testis
FBgn0035957	-2.83747	1.61986	142.306	2.44618e-06	4.86144e-05	CG5144	CG5144		6.82225	5.36809	4.89221	6.55438	0.792008	0.5306	0.509723	0.675638	Testis
FBgn0035970	-8.86144	0.476294	211.75	3.2283e-05	0.000326631	CG4483	CG4483		3.86594	1.86716	2.81302	3.09936	0	0	0	0	Testis
FBgn0035988	-3.88803	3.93007	241.128	3.47088e-07	1.74363e-05	CG3982	CG3982		32.5194	31.3917	30.7598	33.5848	1.0357	1.94553	1.38353	2.39072	Testis
FBgn0036014	-2.94039	2.355	33.726	0.00043657	0.00374835	CG3222	CG3222		10.8777	7.76039	10.7017	10.6191	0.33508	0.429533	2.11171	1.71508	Testis
FBgn0036029	-6.17173	2.18823	141.083	2.78728e-06	5.23489e-05	CG16719	CG16719		10.5745	8.92737	10.1513	10.1618	0.0913855	0.176867	0	0.0519722	Testis
FBgn0036031	-6.52355	1.5599	187.554	8.96941e-07	2.77954e-05	CG6761	CG6761		6.17793	6.53506	5.38144	7.41813	0.0913855	0.0252667	0.0728176	0	Testis
FBgn0036070	-9.11136	0.708176	264.285	1.84715e-05	0.000201059	CG8072	CG8072		3.48693	2.33395	3.91377	4.11554	0	0	0	0	Testis
FBgn0036082	-6.19756	2.1773	268.097	2.28302e-07	1.5028e-05	CG12362	CG12362		11.7115	7.0602	9.0506	11.5337	0.0304618	0.101067	0.145635	0.155917	Testis
FBgn0036089	-8.41993	0.0642477	479.726	4.30356e-06	6.87479e-05	CG14151	CG14151		2.08458	2.33395	1.95689	2.2356	0	0	0	0	Testis
FBgn0036093	-8.92921	0.539451	349.852	9.27902e-06	0.000114795	CG14154	CG14154		4.05545	3.03414	2.69072	2.48965	0	0	0	0	Testis
FBgn0036156	-8.50759	0.146601	379.408	7.61883e-06	0.000100854	CG11726	CG11726		2.53939	2.21725	1.83458	2.54046	0	0	0	0	Testis
FBgn0036159	-10.1602	1.71631	474.126	4.42849e-06	6.9858e-05	CG7557	CG7557		8.1488	6.06827	5.74835	8.78998	0	0	0	0	Testis
FBgn0036160	-6.33209	-0.379724	140.509	2.5662e-06	4.98389e-05	CG12289	CG12289		1.47816	1.69212	1.1619	1.72751	0.0304618	0	0	0	Testis
FBgn0036162	-8.78654	1.92256	255.826	2.74298e-07	1.59559e-05	CG6140	Fum3	Fumarase 3	10.7261	6.30167	6.78795	9.4505	0.0304618	0	0	0	Testis
FBgn0036204	-4.84126	0.00770266	194.433	7.48012e-07	2.54773e-05	CG11611	Tim13	Tim13	1.51606	1.69212	2.44611	2.33722	0.0609237	0.0252667	0.0728176	0.0519722	Testis
FBgn0036206	-4.7037	0.329094	166.088	1.36307e-06	3.41279e-05	CG5964	CG5964		2.27408	2.04221	2.56841	3.20098	0.0609237	0.0252667	0.145635	0.103944	Testis
FBgn0036212	-0.994053	1.94781	22.4461	0.00151059	0.0121254	CG11597	CG11597		5.95052	6.65176	4.46415	5.63981	1.43171	1.79393	3.13116	2.85847	Testis
FBgn0036214	-5.42849	0.79169	114.894	5.65664e-06	8.21481e-05	CG7264	CG7264		3.97965	3.61763	3.30224	3.55664	0.0609237	0	0.0728176	0.155917	Testis
FBgn0036217	-6.50562	-0.22339	145.268	2.26391e-06	4.67561e-05	CG5906	CG5906		2.12248	1.63377	1.28421	1.77832	0.0304618	0	0	0	Testis
FBgn0036218	-9.45173	2.60679	289.523	1.77583e-07	1.37868e-05	CG14128	Sprn	Spermitin	15.009	12.8367	12.1694	14.0741	0	0	0.0728176	0	Testis
FBgn0036221	-10.2765	1.82898	921.105	8.7436e-07	2.74709e-05	CG11588	CG11588		8.79313	7.11855	7.27717	8.02784	0	0	0	0	Testis
FBgn0036222	-6.18621	0.66235	87.5099	1.58928e-05	0.00017786	CG5718	SdhAL	Succinate dehydrogenase, subunit A (flavoprotein)-like	4.16916	2.21725	3.24109	3.55664	0	0.0252667	0.145635	0	Testis
FBgn0036224	-8.4929	1.63046	274.819	2.06467e-07	1.42789e-05	CG7257	Rpt4R	Regulatory particle triple-A ATPase 4-related	8.41411	5.19304	6.23757	7.16409	0	0.0252667	0	0	Testis
FBgn0036236	-6.57278	-0.150632	131.337	3.36366e-06	5.84236e-05	CG6931	CG6931		2.34989	1.45872	1.77343	1.62589	0	0	0	0.0519722	Testis
FBgn0036246	-5.48777	-0.453014	119.087	4.7742e-06	7.34721e-05	CG17154	CG17154		1.66766	1.22532	1.1619	1.57508	0.0304618	0	0	0.0519722	Testis
FBgn0036310	-7.16424	0.369271	190.291	8.17109e-07	2.68714e-05	CG10969	CG10969		3.56273	2.33395	2.56841	2.28641	0	0.0252667	0	0	Testis
FBgn0036311	-6.7051	1.72524	200.152	7.00539e-07	2.44477e-05	CG17666	CG17666		9.28585	6.47672	5.93181	7.06247	0.0304618	0.0758	0.0728176	0	Testis
FBgn0036325	-8.28101	-0.0591827	313.829	1.20803e-05	0.000143772	CG10752	CG10752		2.50149	1.92551	1.65112	1.72751	0	0	0	0	Testis
FBgn0036327	-9.60767	1.18166	447.089	5.10957e-06	7.62536e-05	CG10748	CG10748		4.88928	4.20111	4.34184	6.14791	0	0	0	0	Testis
FBgn0036328	-9.32534	0.911568	669.934	1.90482e-06	4.21963e-05	CG10749	CG10749		4.24496	3.67597	4.03608	4.16635	0	0	0	0	Testis
FBgn0036329	-9.46907	1.05044	279.143	1.65589e-05	0.000183948	CG11262	CG11262		5.07879	4.6679	2.75187	5.33496	0	0	0	0	Testis
FBgn0036345	-7.44392	1.36042	122.909	4.62851e-06	7.19131e-05	CG17300	CG17300		5.91262	4.08442	5.44259	6.70681	0	0	0	0.103944	Testis
FBgn0036346	-9.02084	0.625522	325.178	1.10825e-05	0.000133863	CG11251	CG11251		4.05545	2.6257	2.69072	3.65826	0	0	0	0	Testis
FBgn0036348	-5.06996	1.50395	342.702	8.43132e-08	1.19535e-05	CG17687	CG17687		6.82225	4.6679	6.35988	6.19872	0.152309	0.126333	0.0728176	0.155917	Testis
FBgn0036354	-0.876724	3.57129	42.9561	0.000186056	0.0016538	CG10191	Poc1	Proteome of centrioles 1	18.5717	14.7039	16.9393	18.6978	6.18375	5.55866	9.46629	8.88724	Testis
FBgn0036403	-7.35304	1.71823	464.624	2.58111e-08	8.8712e-06	CG6661	CG6661		8.45201	6.65176	5.93181	7.67218	0.0304618	0.0252667	0	0.0519722	Testis
FBgn0036415	-3.12247	4.31391	277.564	1.94801e-07	1.37905e-05	CG7768	CG7768		45.8986	35.9429	41.4615	37.1415	2.68064	2.37507	4.9516	5.0413	Testis
FBgn0036421	-9.05518	0.654114	524.841	3.4566e-06	5.92217e-05	CG13481	CG13481		2.95631	3.26753	3.4857	3.65826	0	0	0	0	Testis
FBgn0036423	-1.49254	1.51119	60.1379	5.77663e-05	0.000544626	CG3919	CG3919		4.85138	4.20111	4.09723	5.23334	1.2794	1.23807	1.31072	1.19536	Testis
FBgn0036426	-7.78417	-0.503343	239.703	2.31978e-05	0.000242274	CG9592	CG9592		1.55396	1.22532	1.10075	1.62589	0	0	0	0	Testis
FBgn0036437	-4.52828	2.81922	102.23	9.16771e-06	0.000114013	CG5048	CG5048		14.9711	13.2452	14.0651	17.7832	0.213233	0.252667	1.16508	0.675638	Testis
FBgn0036438	-5.34446	1.74718	82.1204	2.03256e-05	0.00021687	CG13477	goddard	goddard	6.93596	6.36002	6.78795	8.58674	0.121847	0.101067	0.364088	0	Testis
FBgn0036441	-3.04284	1.77946	238.451	3.4219e-07	1.74363e-05	CG13476	CG13476		7.65609	7.2936	5.19798	6.80842	0.700622	0.4548	0.728176	0.675638	Testis
FBgn0036443	-9.34767	0.933907	493.244	4.02169e-06	6.60117e-05	CG13471	CG13471		4.58607	4.43451	3.11879	4.26797	0	0	0	0	Testis
FBgn0036465	-6.46404	1.48671	106.978	7.76169e-06	0.000102364	CG11552	Rpn12R	Regulatory particle non-ATPase 12-related	6.06423	6.12662	5.62605	6.40195	0	0.101067	0.0728176	0	Testis
FBgn0036482	-4.30458	1.4451	104.875	7.95607e-06	0.000104201	CG13457	CG13457		6.74645	6.71011	4.40299	4.77606	0.0609237	0.176867	0.436905	0.311833	Testis
FBgn0036490	-6.98703	0.905915	230.648	3.91426e-07	1.86536e-05	CG6888	CG6888		4.81348	3.55928	3.66916	3.9123	0	0.0252667	0	0.0519722	Testis
FBgn0036491	-6.61254	0.571963	138.035	2.85254e-06	5.33886e-05	CG7259	Best4	Bestrophin 4	3.18372	2.2756	4.03608	2.94693	0	0.0252667	0.0728176	0	Testis
FBgn0036492	-7.0281	1.765	237.312	3.65578e-07	1.79742e-05	CG12327	Best3	Bestrophin 3	8.48992	5.19304	7.88869	7.97704	0.0304618	0.0505333	0.0728176	0	Testis
FBgn0036496	-11.5248	3.05504	576.1	3.00466e-06	5.54127e-05	CG7804	CG7804		21.4143	12.8367	17.8566	21.8987	0	0	0	0	Testis
FBgn0036497	-9.41414	0.995729	679.44	1.84036e-06	4.11492e-05	CG7815	Ran-like	Ran-like	4.16916	4.08442	4.21953	4.67444	0	0	0	0	Testis
FBgn0036498	-8.86708	1.99407	283.37	1.85237e-07	1.37868e-05	CG13455	CG13455		10.4987	6.82681	7.15486	10.5175	0	0.0252667	0	0	Testis
FBgn0036499	-8.66707	0.295424	259.371	1.91706e-05	0.000207059	CG7276	CG7276		3.18372	2.15891	1.89573	2.94693	0	0	0	0	Testis
FBgn0036520	-3.1156	1.26239	59.3786	6.22659e-05	0.000583171	CG13449	CG13449		5.19249	4.37616	4.58645	4.4712	0.152309	0.2274	0.728176	0.779583	Testis
FBgn0036568	-7.13385	2.53211	134.643	3.31683e-06	5.80807e-05	CG5389	ATPsynbetaL	ATP synthase, beta subunit-like	14.3646	9.5692	12.7198	14.3282	0.0609237	0.126333	0	0	Testis
FBgn0036652	-7.72944	2.10233	202.97	6.86678e-07	2.41124e-05	CG13032	CG13032		10.1576	8.51892	8.43907	10.6191	0.0304618	0	0	0.103944	Testis
FBgn0036654	-7.20412	0.402992	217.827	4.84279e-07	2.08044e-05	CG9692	CG9692		2.5773	2.56735	2.75187	3.15017	0	0.0252667	0	0	Testis
FBgn0036670	-2.74729	0.687649	112.402	5.92237e-06	8.45989e-05	CG13029	CG13029		3.44903	3.09249	2.07919	3.30259	0.213233	0.277933	0.436905	0.519722	Testis
FBgn0036687	-7.85491	2.86744	839.497	2.54892e-09	6.16818e-06	CG6652	CG6652		19.5571	13.7703	13.7594	17.6816	0.0609237	0.0252667	0.0728176	0.0519722	Testis
FBgn0036689	-1.35162	1.64553	25.5389	0.00101843	0.00832203	CG7730	CG7730		4.96508	3.55928	4.15838	6.96085	1.61448	1.38967	1.2379	1.71508	Testis
FBgn0036703	-9.87782	1.44187	550.299	3.07939e-06	5.63329e-05	CG7707	CG7707		6.86016	4.95965	6.66564	5.18253	0	0	0	0	Testis
FBgn0036704	-8.17979	-0.153927	469.785	4.52888e-06	7.08788e-05	CG6497	CG6497		1.85717	1.86716	1.83458	1.72751	0	0	0	0	Testis
FBgn0036706	-8.63211	0.261672	268.559	1.76215e-05	0.000193479	CG6485	ND-24L	NADH dehydrogenase (ubiquinone) 24 kDa subunit-like	2.7668	2.97579	1.65112	2.59127	0	0	0	0	Testis
FBgn0036708	-8.90588	0.516686	443.521	5.21029e-06	7.72075e-05	CG13725	CG13725		3.52483	3.26753	2.38495	2.89612	0	0	0	0	Testis
FBgn0036712	-3.60056	-0.0729579	28.4938	0.000748851	0.00625439	CG16793	brv2	brivido-2	2.42569	1.40037	1.52882	1.82913	0.121847	0.202133	0	0	Testis
FBgn0036714	-0.642211	4.43056	29.5104	0.000643913	0.00540582	CG7692	CG7692		30.6243	28.1241	31.5548	27.945	12.4589	12.6081	19.0054	15.9035	Testis
FBgn0036723	-8.47649	1.61429	304.331	1.3723e-07	1.31872e-05	CG12229	CG12229		7.76979	6.06827	5.62605	7.26571	0	0.0252667	0	0	Testis
FBgn0036729	-3.9788	1.37355	30.66	0.000593487	0.00500099	CG13733	CG13733		6.02632	3.73432	5.13682	6.35114	0.304618	0.4548	0	0.0519722	Testis
FBgn0036730	-3.04566	0.254257	49.4146	0.00011765	0.0010641	CG13732	qjt	quijote	2.00877	1.75046	2.2015	2.89612	0.274157	0.176867	0.29127	0.0519722	Testis
FBgn0036731	-5.86457	-0.140335	166.239	1.35837e-06	3.41279e-05	CG6333	CG6333		2.31199	1.69212	1.77343	1.47347	0.0304618	0.0252667	0	0	Testis
FBgn0036747	-8.53712	0.174492	248.406	2.12817e-05	0.000225165	CG6052	CG6052		3.07001	1.80881	2.50726	1.93075	0	0	0	0	Testis
FBgn0036751	-4.80826	-0.0270112	62.6399	5.18408e-05	0.000494931	CG5998	Adgf-B	Adenosine deaminase-related growth factor B	2.5773	1.92551	1.46766	1.77832	0	0.0505333	0	0.155917	Testis
FBgn0036763	-0.86706	4.43237	19.1282	0.00245624	0.0191468	CG7441	TrpRS-m	Tryptophanyl-tRNA synthetase, mitochondrial	31.9888	29.8746	30.1483	33.4324	15.6574	12.9871	12.379	11.5898	Testis
FBgn0036784	-7.12938	1.04059	224.787	4.38086e-07	2.01165e-05	CG5103	CG5103		4.92718	3.73432	3.79147	5.13172	0	0.0252667	0	0.0519722	Testis
FBgn0036785	-7.32002	2.08681	213.85	5.48913e-07	2.23146e-05	CG13700	CG13700		10.8398	9.10241	7.58293	9.75536	0.0304618	0.0252667	0.145635	0	Testis
FBgn0036807	-8.66322	0.290457	320.649	1.14663e-05	0.000137765	CG6893	CG6893		3.03211	1.92551	2.50726	2.69288	0	0	0	0	Testis
FBgn0036809	-6.56846	0.960107	87.2577	1.63228e-05	0.000181681	CG12477	CG12477		4.47237	3.03414	3.66916	5.33496	0.0913855	0	0	0	Testis
FBgn0036830	-7.47153	0.653127	252.485	2.74608e-07	1.59559e-05	CG14077	CG14077		3.29742	3.26753	3.24109	3.50583	0	0.0252667	0	0	Testis
FBgn0036868	-7.45309	0.679	146.07	2.30667e-06	4.72895e-05	CG14087	ms(3)76Ba	male sterile (3) 76Ba	4.35866	2.68404	3.30224	3.15017	0	0	0.0728176	0	Testis
FBgn0036874	-3.45483	0.160768	62.535	5.16162e-05	0.000494034	CG9472	brv1	brivido-1	2.53939	1.57542	2.01804	2.33722	0.0304618	0.202133	0.145635	0.207889	Testis
FBgn0036882	-1.52922	3.78508	36.859	0.000322019	0.00279873	CG9279	CG9279		25.0907	22.4059	23.0546	21.3906	3.77727	3.8658	7.42739	11.4339	Testis
FBgn0036895	-5.05491	1.40223	296.758	1.47222e-07	1.31872e-05	CG9392	ms(3)76Cc	male sterile (3) 76Cc	6.59485	5.54314	5.13682	5.13172	0.182771	0.0758	0.0728176	0.155917	Testis
FBgn0036924	-8.64195	0.268845	192.114	4.09484e-05	0.00040421	CG7570	hale	hale-bopp	2.50149	1.57542	2.81302	3.09936	0	0	0	0	Testis
FBgn0036925	-9.28113	0.869549	692.956	1.75388e-06	4.0067e-05	CG17736	schuy	schumacher-levy	4.01755	4.14276	3.4857	4.01392	0	0	0	0	Testis
FBgn0036931	-1.7139	2.91934	100.759	8.88731e-06	0.000111628	CG14183	CG14183		14.0235	13.1868	12.2917	12.2958	2.55879	1.94553	3.49524	4.88538	Testis
FBgn0036941	-8.04213	-0.276075	246.308	2.17227e-05	0.000228977	CG7335	CG7335		1.70556	1.45872	1.34536	2.08317	0	0	0	0	Testis
FBgn0036962	-2.61959	1.59022	39.9419	0.000246552	0.00216105	CG17122	CG17122		6.59485	5.018	4.95337	6.04629	0.426466	0.252667	1.01945	1.50719	Testis
FBgn0036995	-1.88042	0.981749	40.7839	0.000222075	0.00196014	CG5195	atk	artichoke	3.48693	3.09249	4.15838	2.69288	0.761546	0.656933	0.364088	0.987471	Testis
FBgn0037023	-8.67641	0.299247	437.255	5.39399e-06	7.9247e-05	CG3698	CG3698		2.38779	2.6257	2.99648	2.28641	0	0	0	0	Testis
FBgn0037035	-10.0265	1.58602	882.031	9.72213e-07	2.87822e-05	CG10589	CG10589		7.42868	6.12662	6.29873	6.40195	0	0	0	0	Testis
FBgn0037037	-2.88195	0.801738	89.8113	1.35781e-05	0.000157145	CG10588	CG10588		3.25952	3.03414	2.87418	3.9123	0.182771	0.2274	0.582541	0.519722	Testis
FBgn0037040	-11.2545	2.78809	1455.23	2.8518e-07	1.61726e-05	CG12983	CG12983		18.1927	14.7622	14.3709	14.2774	0	0	0	0	Testis
FBgn0037050	-1.25217	1.22351	50.2874	0.00010822	0.000979594	CG10566	ICA69	Islet cell autoantigen 69 kDa	3.79014	4.08442	2.87418	3.55664	0.913855	0.884333	1.38353	1.66311	Testis
FBgn0037059	-6.73932	1.1104	186.958	9.02508e-07	2.78159e-05	CG10510	CG10510		5.64731	3.79267	4.89221	4.16635	0.0304618	0.0505333	0	0	Testis
FBgn0037064	-7.05267	2.68119	549.983	1.34792e-08	6.94916e-06	CG9389	CG9389		16.6766	12.8367	12.9032	14.2774	0.0304618	0.101067	0.0728176	0.103944	Testis
FBgn0037086	-8.78554	1.95669	211.125	5.82079e-07	2.26871e-05	CG7202	CG7202		9.70276	7.58534	6.72679	10.0602	0	0	0.0728176	0	Testis
FBgn0037115	-3.5296	1.31656	77.8765	2.3535e-05	0.000245344	CG11249	CG11249		4.81348	5.89323	4.6476	4.57282	0.152309	0.1516	0.655358	0.571694	Testis
FBgn0037147	-7.19336	1.08613	306.162	1.30489e-07	1.31872e-05	CG7140	CG7140		4.28286	4.84295	4.40299	4.72525	0.0304618	0.0252667	0	0	Testis
FBgn0037169	-9.86001	1.42451	884.191	9.66412e-07	2.87211e-05	CG11404	CG11404		6.02632	6.06827	5.25913	6.04629	0	0	0	0	Testis
FBgn0037170	-7.94159	-0.363814	180.791	4.57784e-05	0.000444918	CG11401	Trxr-2	thioredoxin reductase 2	1.89507	1.05028	1.40651	1.77832	0	0	0	0	Testis
FBgn0037172	-7.84149	-0.454016	295.991	1.39225e-05	0.000160313	CG6914	ND-B14.5AL	NADH dehydrogenase (ubiquinone) B14.5 A subunit-like	1.66766	1.22532	1.52882	1.32104	0	0	0	0	Testis
FBgn0037191	-3.28865	0.627286	26.2383	0.000969122	0.00794204	CG14448	CG14448		2.5773	3.03414	3.11879	3.15017	0.0913855	0.0252667	0.29127	0.72761	Testis
FBgn0037254	-5.96189	0.752186	185.857	8.96381e-07	2.77954e-05	CG14651	CG14651		4.47237	3.73432	2.75187	3.20098	0.0304618	0.0505333	0.0728176	0	Testis
FBgn0037276	-5.58733	1.86884	173.466	1.21093e-06	3.23162e-05	CG17387	CG17387		9.70276	7.11855	7.15486	7.57056	0.0913855	0.202133	0.0728176	0.0519722	Testis
FBgn0037283	-9.97136	1.53119	681.454	1.8271e-06	4.10356e-05	CG14658	CG14658		5.68521	5.77653	6.8491	6.91004	0	0	0	0	Testis
FBgn0037295	-1.17259	0.694924	28.8173	0.000694724	0.00582377	CG12591	dpr16	defective proboscis extension response 16	2.7289	2.3923	2.26265	2.18479	0.761546	0.480066	0.873811	1.35128	Testis
FBgn0037296	-5.54396	1.27383	107.454	7.42361e-06	9.85931e-05	CG12161	Prosbeta2R2	Proteasome beta2 subunit-related 2	6.51904	4.31781	4.28069	5.38577	0	0.0758	0.145635	0.155917	Testis
FBgn0037310	-5.63736	0.947324	133.572	3.22615e-06	5.74427e-05	CG1158	Tim17b1	Tim17b1	4.85138	3.32588	3.05763	4.9793	0.0304618	0.0505333	0	0.155917	Testis
FBgn0037320	-1.21564	1.21089	32.9235	0.00045194	0.00387153	CG14668	CG14668		3.63854	3.20918	3.73031	3.45502	0.82247	1.0612	1.74762	1.19536	Testis
FBgn0037325	-7.04618	0.260104	193.968	7.54892e-07	2.56347e-05	CG12147	CG12147		3.18372	2.2756	2.26265	2.18479	0	0.0252667	0	0	Testis
FBgn0037365	-5.57825	-0.363362	106.488	7.35097e-06	9.78592e-05	CG2104	CG2104		1.59186	1.22532	1.77343	1.47347	0	0.0252667	0.0728176	0	Testis
FBgn0037375	-1.54628	2.20938	26.2346	0.000948432	0.00778373	CG1193	kat-60L1	katanin p60-like 1	8.64152	9.91929	6.66564	5.43658	1.2794	1.23807	2.40298	3.79397	Testis
FBgn0037388	-9.32287	0.910362	451.288	4.99454e-06	7.53299e-05	CG14676	CG14676		5.04089	3.73432	4.09723	3.25179	0	0	0	0	Testis
FBgn0037398	-5.46588	0.827768	108.743	6.9799e-06	9.46962e-05	CG15580	CG15580		4.69977	3.38423	3.24109	3.50583	0.0609237	0	0.0728176	0.155917	Testis
FBgn0037402	-6.69709	0.626128	112.851	6.08472e-06	8.61584e-05	CG1076	Vha14-2	Vacuolar H[+] ATPase 14kD subunit 2	3.75224	2.3923	2.93533	3.86149	0.0609237	0	0	0	Testis
FBgn0037432	-9.17597	0.767929	345.065	9.59487e-06	0.00011816	CG10298	CG10298		2.84261	3.55928	3.54686	4.57282	0	0	0	0	Testis
FBgn0037454	-5.41072	1.69532	179.895	1.05056e-06	2.9953e-05	CG1137	CG1137		8.1867	6.30167	6.17642	7.06247	0.0609237	0.0505333	0.145635	0.311833	Testis
FBgn0037455	-9.16561	0.759479	594.593	2.5492e-06	4.95936e-05	CG2336	CG2336		3.82804	3.73432	3.85262	3.04855	0	0	0	0	Testis
FBgn0037456	-7.6442	0.835497	205.72	6.17342e-07	2.3275e-05	CG1138	CG1138		3.37323	3.73432	3.73031	4.36959	0	0	0	0.0519722	Testis
FBgn0037460	-10.6587	2.20199	865.481	1.01834e-06	2.96914e-05	CG15178	sowi	solwind	10.4987	8.63562	9.90673	11.5845	0	0	0	0	Testis
FBgn0037461	-10.0009	1.56182	510.202	3.70352e-06	6.2138e-05	CG15177	CG15177		7.46658	5.30974	5.50374	7.46894	0	0	0	0	Testis
FBgn0037463	-10.0955	1.65355	499.726	3.89569e-06	6.44094e-05	CG1984	djl	don juan like	8.22461	5.36809	6.17642	7.72299	0	0	0	0	Testis
FBgn0037464	-9.88857	1.45359	447.409	5.10068e-06	7.62213e-05	CG1988	Mst84B	Male-specific transcript 84B	7.88349	4.7846	5.74835	5.43658	0	0	0	0	Testis
FBgn0037483	-4.33627	2.35021	168.002	1.36126e-06	3.41279e-05	CG14609	CG14609		12.3559	10.6195	10.029	10.111	0.152309	0.4548	0.582541	0.519722	Testis
FBgn0037486	-6.0661	0.480689	152.191	1.94795e-06	4.26518e-05	CG14605	CG14605		3.63854	2.6257	2.38495	2.94693	0.0304618	0.0505333	0	0	Testis
FBgn0037500	-8.66332	0.292042	261.303	1.88293e-05	0.000204171	CG17944	CG17944		3.33532	1.92551	2.2015	2.69288	0	0	0	0	Testis
FBgn0037502	-8.46482	1.60333	255.842	2.73001e-07	1.59559e-05	CG10113	wa-cup	walker cup	7.73189	5.54314	5.07567	8.12946	0	0.0252667	0	0	Testis
FBgn0037506	-1.36387	2.13052	16.4953	0.00375507	0.0286031	CG1287	Mics1	Mitochondrial morphology and cristae structure 1	6.25373	6.94351	6.9714	7.72299	1.70586	2.75407	2.4758	1.19536	Testis
FBgn0037512	-6.84828	0.0759993	199.918	6.72581e-07	2.40708e-05	CG2616	CG2616		2.23618	2.3923	2.2015	1.82913	0	0.0252667	0	0	Testis
FBgn0037514	-9.53541	1.11296	265.538	1.88724e-05	0.000204442	CG10919	CG10919		4.66187	3.96772	3.42455	6.55438	0	0	0	0	Testis
FBgn0037516	-6.57894	-0.169113	150.641	1.97367e-06	4.28839e-05	CG11286	CG11286		1.40235	1.75046	1.77343	2.2356	0	0.0252667	0	0	Testis
FBgn0037571	-8.28369	-0.0545496	137.127	9.31222e-05	0.000850396	CG11694	CG11694		2.691	2.10056	1.0396	1.98156	0	0	0	0	Testis
FBgn0037579	-6.35624	1.36466	122.142	4.63534e-06	7.19207e-05	CG18193	COX7AL	Cytochrome c oxidase subunit 7A-like	6.63275	4.25946	4.46415	6.75762	0.0913855	0.0505333	0	0	Testis
FBgn0037581	-0.78749	1.97583	22.7881	0.00144292	0.0115986	CG7352	CG7352		5.76101	5.25139	6.05411	4.92849	1.85817	1.92027	2.83989	3.69002	Testis
FBgn0037610	-1.27998	2.52876	44.4993	0.000164951	0.00147313	CG8043	CG8043		10.006	7.64369	9.1729	9.50131	2.68064	2.5772	2.25734	4.31369	Testis
FBgn0037616	-4.42169	2.58905	223.811	4.55916e-07	2.0533e-05	CG8136	CG8136		14.4783	11.3197	11.2521	14.0741	0.426466	0.3032	0.29127	0.883527	Testis
FBgn0037626	-4.95791	0.485008	122.649	4.39765e-06	6.9565e-05	CG8236	CG8236		4.01755	2.68404	2.26265	2.48965	0.0913855	0.0758	0	0.0519722	Testis
FBgn0037654	-2.97482	1.17352	137.453	2.78776e-06	5.23489e-05	CG11983	CG11983		5.07879	4.31781	3.24109	4.67444	0.274157	0.379	0.655358	0.46775	Testis
FBgn0037726	-1.84708	-0.109947	32.7371	0.000460394	0.00394098	CG9492	CG9492		1.02334	2.10056	1.65112	1.21942	0.396004	0.277933	0.29127	0.259861	Testis
FBgn0037742	-2.82967	2.49353	171.858	1.19719e-06	3.21767e-05	CG9475	Rpt3R	Regulatory particle triple-A ATPase 3-related	11.2188	10.1527	10.824	11.6353	1.30986	0.631666	1.38353	1.66311	Testis
FBgn0037746	-0.966769	4.17805	55.3534	7.7393e-05	0.000713071	CG8478	CG8478		30.8138	22.9311	24.6445	29.2153	10.6616	8.1864	11.2867	13.6167	Testis
FBgn0037751	-3.05397	1.62236	206.826	5.90624e-07	2.28935e-05	CG8484	topi	matotopetli	5.91262	4.95965	7.03256	6.14791	0.487389	0.429533	0.509723	0.883527	Testis
FBgn0037798	-1.87465	0.684876	67.5981	3.80753e-05	0.000378484	CG12817	CG12817		2.50149	3.26753	3.05763	1.98156	0.456928	0.404267	0.800993	0.72761	Testis
FBgn0037811	-1.03853	1.47728	30.3758	0.000586837	0.00495231	CG12592	CG12592		3.48693	4.31781	4.83106	3.75988	1.73632	1.137	1.52917	1.871	Testis
FBgn0037812	-4.19743	-0.390104	52.0743	9.85333e-05	0.000896922	CG18545	CG18545		1.36445	1.34202	1.89573	1.21942	0.0609237	0.101067	0	0	Testis
FBgn0037826	-8.78728	0.407926	252.166	2.05225e-05	0.000218354	CG14689	CG14689		3.97965	2.56735	2.3238	2.2356	0	0	0	0	Testis
FBgn0037828	-8.4721	1.60961	313.383	1.21998e-07	1.2812e-05	CG14690	tomboy20	tomboy20	7.31497	5.89323	6.05411	7.36733	0	0.0252667	0	0	Testis
FBgn0037829	-4.69014	0.518219	42.7532	0.000199164	0.00176341	CG14691	CG14691		2.691	2.56735	3.30224	3.15017	0.0304618	0.202133	0	0	Testis
FBgn0037857	-9.05062	0.651898	537.538	3.2608e-06	5.77876e-05	CG4683	Tengl4	Testis EndoG-Like 4	3.79014	2.91744	3.3634	3.25179	0	0	0	0	Testis
FBgn0037860	-9.15095	0.744825	353.395	9.0546e-06	0.000113227	CG6629	CG6629		2.95631	3.50093	3.24109	4.57282	0	0	0	0	Testis
FBgn0037862	-9.12139	2.24188	405.779	4.5384e-08	9.54885e-06	CG4706	mAcon2	Mitochondrial aconitase 2	11.1809	9.91929	9.84558	10.8732	0	0.0252667	0	0	Testis
FBgn0037902	-1.21087	1.03017	36.3525	0.000326122	0.00283221	CG5281	CG5281		3.33532	3.38423	2.93533	2.69288	0.82247	0.884333	0.873811	1.66311	Testis
FBgn0037910	-8.15531	1.31092	219.003	4.95344e-07	2.09634e-05	CG14708	CG14708		6.14003	3.73432	5.19798	6.35114	0.0304618	0	0	0	Testis
FBgn0037915	-6.67626	2.87459	258.345	2.80224e-07	1.61335e-05	CG6790	CG6790		17.283	15.8125	15.7162	16.0049	0.182771	0.0252667	0.0728176	0.207889	Testis
FBgn0037916	-7.58579	0.762026	233.222	3.75104e-07	1.8104e-05	CG5342	CG5342		4.20706	2.91744	3.60801	3.65826	0	0.0252667	0	0	Testis
FBgn0037939	-8.44044	3.15764	420.033	4.14403e-08	9.54885e-06	CG14718	CG14718		21.9449	17.9131	18.407	21.2382	0	0.0505333	0.0728176	0.0519722	Testis
FBgn0037962	-6.20615	0.943246	133.245	3.26783e-06	5.78217e-05	CG6971	Dnali1	Dynein axonemal light intermediate chain 1	4.69977	3.85102	3.30224	4.4712	0.0304618	0.0758	0	0	Testis
FBgn0037964	-8.0398	-0.276492	268.015	1.77083e-05	0.000194055	CG14731	CG14731		2.08458	1.34202	1.52882	1.62589	0	0	0	0	Testis
FBgn0037970	-1.46861	1.04827	16.4456	0.00377442	0.0287312	CG12201	GC2	Glutamate Carrier 2	3.86594	2.68404	2.26265	4.26797	0.761546	0.555866	0.655358	1.92297	Testis
FBgn0037985	-7.6279	2.89253	115.187	5.91268e-06	8.4567e-05	CG14735	ssp5	short spindle 5	19.3297	14.1204	14.432	17.9864	0	0.0252667	0	0.259861	Testis
FBgn0037986	-5.84546	-0.805472	133.402	3.11989e-06	5.65268e-05	CG14736	CG14736		1.02334	1.10863	1.1619	1.01618	0	0.0252667	0	0	Testis
FBgn0037987	-9.49734	1.07817	359.083	8.71e-06	0.000110379	CG14739	CG14739		5.95052	3.90937	3.4857	4.82687	0	0	0	0	Testis
FBgn0037988	-7.84837	2.20486	206.182	6.48577e-07	2.35976e-05	CG14740	CG14740		10.385	7.87709	9.60097	12.6515	0.0609237	0	0	0.0519722	Testis
FBgn0037994	-10.1751	1.73024	863.749	1.02334e-06	2.97151e-05	CG4810	eIF3d2	eukaryotic translation initiation factor 3 subunit	7.9593	6.82681	6.48218	7.82461	0	0	0	0	Testis
FBgn0037995	-9.74515	1.3143	643.946	2.09814e-06	4.49362e-05	CG3809	CG3809		6.25373	4.60955	5.38144	5.33496	0	0	0	0	Testis
FBgn0038000	-8.35747	1.54055	187.388	9.07088e-07	2.78813e-05	CG10014	CG10014		6.36744	5.07635	5.99296	7.82461	0	0	0.0728176	0	Testis
FBgn0038008	-3.4939	0.988426	38.8248	0.000274914	0.00239852	CG3942	CG3942		5.2683	3.85102	3.4857	3.04855	0.0609237	0.101067	0.436905	0.675638	Testis
FBgn0038012	-4.88975	-0.204391	64.1379	4.74093e-05	0.000458021	CG10013	CG10013		1.89507	1.80881	1.40651	1.6767	0.0304618	0	0	0.155917	Testis
FBgn0038018	-7.60416	-0.661058	288.338	1.48351e-05	0.00016826	CG10090	Tim17a1	Tim17a1	1.36445	1.05028	1.28421	1.16861	0	0	0	0	Testis
FBgn0038051	-4.47497	0.236007	58.97	6.47628e-05	0.000603071	CG17207	CG17207		2.88051	1.34202	2.3238	2.7945	0.152309	0.0505333	0.0728176	0	Testis
FBgn0038078	-4.57794	0.372929	128.023	3.66029e-06	6.18703e-05	CG14391	CG14391		2.8047	2.10056	2.38495	3.09936	0.0609237	0.0252667	0.0728176	0.207889	Testis
FBgn0038089	-6.21395	-0.492296	129.869	3.45085e-06	5.92126e-05	CG14387	d-cup	davis-cup	1.02334	1.51707	1.40651	1.62589	0	0.0252667	0	0	Testis
FBgn0038090	-8.26243	-0.074276	169.04	5.52608e-05	0.000523616	CG10909	CG10909		2.5773	1.57542	1.28421	2.2356	0	0	0	0	Testis
FBgn0038097	-4.77127	0.3584	313.883	1.18499e-07	1.2812e-05	CG14384	CG14384		2.88051	2.10056	2.2015	3.15017	0.0609237	0.0505333	0.0728176	0.103944	Testis
FBgn0038102	-5.78966	-0.176143	76.7363	2.49536e-05	0.000257882	CG14383	CG14383		2.08458	1.98386	1.34536	1.62589	0	0	0	0.103944	Testis
FBgn0038109	-7.9343	1.13483	175.11	1.16369e-06	3.15754e-05	CG11656	CG11656		5.3062	4.25946	3.91377	5.38577	0	0	0.0728176	0	Testis
FBgn0038122	-6.84161	0.80703	162.903	1.52461e-06	3.68702e-05	CG8138	CG8138		3.71434	3.73432	3.66916	3.70907	0	0	0.0728176	0.0519722	Testis
FBgn0038123	-9.03033	0.632945	492.126	4.044e-06	6.61863e-05	CG8508	CG8508		3.52483	3.26753	2.69072	3.65826	0	0	0	0	Testis
FBgn0038125	-7.31333	0.512875	192.181	7.93728e-07	2.64778e-05	CG8141	CG8141		3.48693	2.2756	2.93533	3.25179	0.0304618	0	0	0	Testis
FBgn0038127	-4.16121	1.1505	77.6523	2.40482e-05	0.000249775	CG8476	CG8476		4.77558	2.97579	4.34184	5.99548	0.0609237	0.126333	0.218453	0.46775	Testis
FBgn0038158	-6.61071	-0.134106	136.95	2.87359e-06	5.36056e-05	CG14370	CG14370		1.74346	1.34202	2.3238	1.93075	0.0304618	0	0	0	Testis
FBgn0038163	-11.0177	2.55429	1837.48	1.60959e-07	1.37868e-05	CG10841	CG10841		13.3034	13.3035	13.0255	12.6007	0	0	0	0	Testis
FBgn0038186	-6.89645	0.161114	124.418	4.19651e-06	6.7995e-05	CG14362	CG14362		2.42569	2.2756	1.71227	2.74369	0	0	0.0728176	0	Testis
FBgn0038200	-9.41514	3.73396	442.292	3.62637e-08	9.34652e-06	CG9920	CG9920		31.913	26.432	27.641	33.1276	0.0609237	0.0252667	0	0	Testis
FBgn0038202	-0.729861	2.29951	14.9382	0.00487071	0.0364885	CG12402	CG12402		7.39078	7.0602	6.05411	6.75762	2.86341	1.895	4.58751	4.00186	Testis
FBgn0038208	-1.73704	3.46888	27.6365	0.000824304	0.00683425	CG14355	CG14355		18.7612	17.1545	18.8962	21.4415	5.2699	5.25546	3.85933	2.59861	Testis
FBgn0038209	-5.06768	0.58457	125.659	4.02844e-06	6.60269e-05	CG9722	CG9722		3.94175	2.97579	2.07919	3.3534	0.0913855	0.0758	0	0.0519722	Testis
FBgn0038210	-7.80704	0.976617	226.682	4.24545e-07	1.97344e-05	CG3199	CG3199		4.20706	3.32588	4.5253	4.77606	0.0304618	0	0	0	Testis
FBgn0038213	-4.13132	0.302452	61.1542	5.64093e-05	0.000533162	CG9624	CG9624		2.46359	2.6257	2.38495	2.33722	0.0913855	0.176867	0.0728176	0	Testis
FBgn0038217	-8.92154	0.532769	213.731	3.17114e-05	0.000321709	CG14840	CG14840		3.75224	2.3923	2.14034	3.86149	0	0	0	0	Testis
FBgn0038218	-6.88345	0.13136	129.181	3.63735e-06	6.15743e-05	CG14841	CG14841		2.84261	1.92551	1.52882	2.64208	0	0	0	0.0519722	Testis
FBgn0038225	-11.4978	3.02817	1560.4	2.40334e-07	1.53014e-05	CG8489	soti	scotti	19.595	16.5711	16.7558	19.8664	0	0	0	0	Testis
FBgn0038248	-5.96667	3.06935	108.573	7.35108e-06	9.78592e-05	CG7886	CG7886		18.6854	18.0881	19.8746	17.0719	0.0304618	0.101067	0.509723	0.46775	Testis
FBgn0038258	-5.40782	-0.0973394	181.183	9.79115e-07	2.88445e-05	CG7362	CG7362		2.6152	1.63377	1.65112	1.52427	0.0304618	0.0252667	0	0.0519722	Testis
FBgn0038266	-9.79838	1.36571	748.029	1.45483e-06	3.57158e-05	CG3610	CG3610		6.48114	5.19304	5.19798	5.5382	0	0	0	0	Testis
FBgn0038280	-9.91766	1.48129	535.686	3.28838e-06	5.79142e-05	CG14861	CG14861		7.12547	5.19304	5.13682	6.85923	0	0	0	0	Testis
FBgn0038281	-9.51051	1.08769	563.222	2.90981e-06	5.41922e-05	CG3843	RpL10Aa	Ribosomal protein L10Aa	4.47237	3.90937	4.95337	4.9793	0	0	0	0	Testis
FBgn0038330	-1.00051	2.14196	25.8609	0.00097749	0.00800483	CG14868	CG14868		6.36744	6.82681	5.6872	7.16409	1.85817	1.71813	2.98552	4.1058	Testis
FBgn0038334	-9.38973	0.973267	460.115	4.76432e-06	7.34196e-05	CG6130	h-cup	heineken-cup	4.47237	3.38423	4.09723	4.87768	0	0	0	0	Testis
FBgn0038342	-6.67772	1.44034	228.812	4.13351e-07	1.95343e-05	CG14870	B9d1	B9d1	6.21583	5.018	5.87066	6.30033	0	0.0505333	0.0728176	0.0519722	Testis
FBgn0038345	-9.16231	0.756676	667.34	1.92297e-06	4.24325e-05	CG5213	CG5213		3.75224	3.38423	3.60801	3.65826	0	0	0	0	Testis
FBgn0038355	-8.01864	1.17376	260.579	2.46197e-07	1.53602e-05	CG4520	CG4520		5.83682	4.14276	4.28069	5.18253	0	0.0252667	0	0	Testis
FBgn0038356	-7.60037	-0.664967	249.062	2.11465e-05	0.000224153	CG12784	CG12784		1.17494	1.16698	1.0396	1.47347	0	0	0	0	Testis
FBgn0038357	-4.91221	-0.543362	97.8141	9.96268e-06	0.000121764	CG5623	CG5623		1.40235	1.16698	1.22305	1.42266	0.0609237	0.0252667	0	0	Testis
FBgn0038359	-11.1277	2.66303	916.635	8.84833e-07	2.75708e-05	CG5614	CG5614		17.0177	12.4283	15.1047	11.8385	0	0	0	0	Testis
FBgn0038361	-2.49907	0.600227	106.51	7.23508e-06	9.72278e-05	CG9589	Uros2	Uroporphyrinogen III synthase 2	3.33532	2.45065	2.2015	2.94693	0.33508	0.404267	0.29127	0.415777	Testis
FBgn0038373	-9.21287	3.53829	214.287	5.79032e-07	2.26871e-05	CG4546	CG4546		30.6622	22.9894	23.2992	27.0305	0.0913855	0	0	0	Testis
FBgn0038377	-9.14753	0.745899	309.366	1.25074e-05	0.000147548	CG9632	CG9632		4.85138	3.09249	2.75187	3.55664	0	0	0	0	Testis
FBgn0038423	-7.75854	1.6499	291.534	1.61984e-07	1.37868e-05	CG10317	CG10317		7.65609	6.88516	6.05411	6.80842	0.0304618	0	0	0.0519722	Testis
FBgn0038445	-6.04789	1.6264	89.3174	1.49988e-05	0.000169608	CG14891	CG14891		7.54238	6.06827	5.93181	7.01166	0	0.0505333	0.29127	0.0519722	Testis
FBgn0038486	-6.37131	1.37921	116.47	5.59027e-06	8.13926e-05	CG5265	CG5265		5.98842	5.36809	5.32028	5.74143	0	0.101067	0	0.0519722	Testis
FBgn0038539	-8.29275	1.47848	192.655	8.15805e-07	2.68714e-05	CG12334	Atg8b	Autophagy-related 8b	6.74645	4.84295	5.93181	6.656	0	0	0.0728176	0	Testis
FBgn0038565	-4.32245	1.39842	89.053	1.46319e-05	0.000167125	CG7794	CG7794		5.53361	4.72625	5.13682	6.40195	0.0913855	0.0758	0.29127	0.519722	Testis
FBgn0038567	-9.42133	1.00345	446.531	5.12514e-06	7.63855e-05	CG14316	CG14316		4.69977	3.32588	4.40299	4.77606	0	0	0	0	Testis
FBgn0038575	-7.51529	1.4146	247.424	3.063e-07	1.65027e-05	CG7208	CG7208		6.10213	4.6679	6.42103	5.89386	0.0304618	0	0	0.0519722	Testis
FBgn0038581	-1.01157	1.97281	18.0995	0.00284923	0.0220436	CG14314	CG14314		6.89806	5.89323	5.32028	5.08091	1.9191	1.16227	2.76707	3.63805	Testis
FBgn0038598	-3.71684	2.80859	81.4418	2.09426e-05	0.0002222	CG7131	CG7131		15.009	13.1868	13.5759	16.2081	0.33508	0.656933	0.728176	1.97494	Testis
FBgn0038607	-8.31724	1.46117	245.562	3.18722e-07	1.68175e-05	CG7669	hmw	hemingway	7.54238	4.72625	4.83106	6.80842	0	0.0252667	0	0	Testis
FBgn0038612	-4.24064	1.34917	124.107	4.22451e-06	6.81779e-05	CG7676	cona	corona	6.44324	3.61763	4.70876	6.19872	0.121847	0.126333	0.218453	0.46775	Testis
FBgn0038626	-7.68975	-0.589307	252.715	2.04148e-05	0.000217413	CG7691	CG7691		1.13704	1.16698	1.34536	1.52427	0	0	0	0	Testis
FBgn0038630	-6.03742	2.24297	71.2013	3.38995e-05	0.000340556	CG14305	CG14305		10.5366	9.62755	9.78443	11.2288	0	0.0252667	0.29127	0.311833	Testis
FBgn0038655	-10.4141	1.96344	730.019	1.54415e-06	3.71842e-05	CG14297	CG14297		9.85437	7.58534	7.33832	9.55212	0	0	0	0	Testis
FBgn0038656	-5.25942	0.0760556	113.862	5.77458e-06	8.32215e-05	CG14294	CG14294		2.19828	1.86716	2.14034	2.28641	0.0609237	0.0505333	0	0	Testis
FBgn0038685	-5.48703	0.615338	108.718	6.94215e-06	9.43568e-05	CG14282	CG14282		3.41113	3.26753	2.14034	3.86149	0.0609237	0.0252667	0.145635	0	Testis
FBgn0038690	-8.87734	0.488763	553.76	3.03263e-06	5.58378e-05	CG11703	CG11703		3.07001	3.03414	2.56841	3.15017	0	0	0	0	Testis
FBgn0038691	-8.32917	-0.0150285	255.921	1.98018e-05	0.000211879	CG5250	CG5250		2.6152	1.57542	1.77343	2.08317	0	0	0	0	Testis
FBgn0038694	-7.21476	1.60933	149.014	2.20689e-06	4.64388e-05	CG5217	CG5217		6.40534	5.018	7.46063	7.57056	0.0609237	0	0.0728176	0	Testis
FBgn0038697	-3.80934	1.16425	62.8525	5.17317e-05	0.000494722	CG3581	CG3581		4.54817	4.7846	4.5253	4.21716	0.152309	0.0505333	0.509723	0.46775	Testis
FBgn0038706	-10.8205	2.36122	702.516	1.69612e-06	3.95209e-05	CG3517	CG3517		13.1518	9.16076	10.1513	13.0071	0	0	0	0	Testis
FBgn0038708	-7.82755	1.6964	250.649	2.95558e-07	1.64325e-05	CG6255	Scsalpha2	Succinyl-coenzyme A synthetase alpha subunit 2	7.50448	4.6679	7.39947	8.63755	0.0304618	0.0252667	0	0	Testis
FBgn0038709	-9.05317	0.658891	144.832	8.33677e-05	0.000765632	CG15025	CG15025		5.04089	2.68404	1.89573	3.70907	0	0	0	0	Testis
FBgn0038725	-0.925341	2.60005	32.6099	0.000466277	0.00398536	CG6184	CG6184		9.62696	9.04406	7.82754	8.8916	3.77727	2.45087	3.42243	5.24919	Testis
FBgn0038767	-0.654363	2.54127	21.8726	0.00163325	0.0130453	CG4413	trem	trade embargo	7.61818	8.63562	7.15486	8.28189	3.56404	2.75407	4.22342	5.66497	Testis
FBgn0038773	-8.73987	1.86925	306.919	1.35071e-07	1.31872e-05	CG10887	CG10887		8.60362	6.18497	8.13331	9.09484	0	0.0252667	0	0	Testis
FBgn0038775	-8.76045	0.38131	282.778	1.55518e-05	0.00017447	CG17199	CG17199		3.10792	2.509	1.95689	3.30259	0	0	0	0	Testis
FBgn0038796	-5.02133	1.15212	170.107	1.26802e-06	3.29104e-05	CG10881	eIF3g2	eukaryotic translation initiation factor 3 subunit	5.60941	3.79267	3.79147	5.43658	0.182771	0.0505333	0.0728176	0.103944	Testis
FBgn0038797	-10.9966	2.53418	840.856	1.09285e-06	3.05298e-05	CG4323	2020-12-02	Dicarboxylate carrier 2	15.1606	10.4444	11.9248	13.8709	0	0	0	0	Testis
FBgn0038887	-11.4504	2.98148	1168.1	4.88704e-07	2.08044e-05	CG7907	CG7907		20.2394	14.6455	16.9393	18.5961	0	0	0	0	Testis
FBgn0038892	-6.72342	1.12993	134.645	3.15264e-06	5.67576e-05	CG15498	CG15498		6.32954	4.55121	3.54686	4.31878	0	0.0505333	0.0728176	0	Testis
FBgn0038909	-7.37771	2.10274	315.415	1.21573e-07	1.2812e-05	CG6569	CG6569		10.8019	7.2936	9.72327	9.85697	0.0304618	0.0252667	0	0.103944	Testis
FBgn0038915	-7.56207	0.760227	200.615	6.7946e-07	2.41114e-05	CG17819	CG17819		4.16916	3.26753	3.11879	3.81069	0	0	0	0.0519722	Testis
FBgn0038921	-6.76863	2.05972	83.39	1.9231e-05	0.000207315	CG6332	Theg	Testicular haploid expressed gene	9.21004	7.76039	7.88869	11.5337	0.0304618	0	0	0.259861	Testis
FBgn0038934	-2.39997	4.7327	13.6396	0.00634463	0.0466369	CG5732	Gld2	GLD2 poly(A) polymerase	49.9541	50.4134	52.3467	48.4211	1.58402	2.1224	14.4179	15.4357	Testis
FBgn0038944	-4.56986	-0.167057	41.7399	0.000215888	0.0019085	CG5388	CG5388		2.16038	1.75046	1.71227	1.27023	0	0	0.145635	0.155917	Testis
FBgn0038952	-1.93555	1.25888	31.8759	0.000510727	0.00435212	CG7069	CG7069		3.14582	4.7846	4.03608	4.57282	0.456928	1.16227	0.655358	0.987471	Testis
FBgn0038960	-6.27689	0.710609	139.636	2.73175e-06	5.18156e-05	CG13855	CG13855		3.60063	3.67597	3.42455	3.09936	0.0304618	0	0	0.103944	Testis
FBgn0038978	-8.4395	2.29264	439.687	3.28407e-08	9.34652e-06	CG7045	tHMG1	testis-enriched HMG-box-containing protein 1	11.4083	9.74425	10.6406	11.4829	0.0304618	0.0252667	0	0	Testis
FBgn0038979	-8.93317	2.07857	286.92	1.76578e-07	1.37868e-05	CG7046	tHMG2	testis-enriched HMG-box-containing protein 2	9.17214	8.22718	8.74483	11.0256	0	0	0	0.0519722	Testis
FBgn0038993	-3.79515	0.471758	71.1298	3.26141e-05	0.0003291	CG13843	CG13843		2.7668	2.91744	2.38495	2.7945	0.0609237	0.0505333	0.364088	0.259861	Testis
FBgn0039002	-6.64354	-0.0870911	127.833	3.75067e-06	6.26511e-05	CG17625	CG17625		2.23618	1.63377	1.40651	2.28641	0	0	0	0.0519722	Testis
FBgn0039007	-1.04747	0.0763963	14.6964	0.00509095	0.038063	CG4910	CCAP	Crustacean cardioactive peptide	1.44025	1.34202	1.89573	1.21942	0.487389	0.4548	0.364088	0.935499	Testis
FBgn0039010	-5.3191	2.40687	426.862	3.5913e-08	9.34652e-06	CG4907	CG4907		11.1809	11.8448	11.3744	11.5337	0.121847	0.176867	0.218453	0.415777	Testis
FBgn0039058	-6.34269	0.773654	237.9	3.45245e-07	1.74363e-05	CG4624	VhaAC39-2	Vacuolar H[+] ATPase AC39 subunit 2	3.60063	3.09249	3.4857	4.21716	0.0304618	0.0252667	0.0728176	0	Testis
FBgn0039059	-4.77654	0.322907	105.076	7.83795e-06	0.000102891	CG13829	CG13829		2.19828	2.2756	2.44611	3.20098	0.0304618	0.101067	0	0.103944	Testis
FBgn0039065	-0.960499	3.04607	28.5255	0.00071761	0.00599789	CG4449	Rad60	Rad60	13.3792	12.3699	10.824	12.245	4.20373	4.06793	3.93215	7.8478	Testis
FBgn0039070	-5.98805	2.00802	238.373	3.58034e-07	1.78891e-05	CG17083	CG17083		10.3471	7.1769	7.82754	9.50131	0.0304618	0.0758	0.218453	0.155917	Testis
FBgn0039071	-5.73292	2.55166	638.33	7.46093e-09	6.16818e-06	CG4434	bb8	big bubble 8	14.7436	11.6114	12.2305	12.5499	0.121847	0.126333	0.29127	0.259861	Testis
FBgn0039077	-5.10514	0.893896	62.741	5.30682e-05	0.000504949	CG17380	CG17380		4.20706	3.15083	3.4857	4.57282	0	0.0252667	0.145635	0.259861	Testis
FBgn0039083	-5.6254	1.90162	59.2135	6.50252e-05	0.000605017	CG10177	CG10177		7.9972	8.28553	7.27717	8.68836	0	0.0505333	0.0728176	0.46775	Testis
FBgn0039088	-9.22792	2.36758	307.427	1.36665e-07	1.31872e-05	CG10164	CG10164		13.834	9.5692	10.2736	11.991	0	0	0	0.0519722	Testis
FBgn0039104	-10.2494	4.09521	475.841	2.73603e-08	9.03861e-06	CG10252	CG10252		40.1376	33.2588	29.9037	49.8946	0	0.0252667	0	0.0519722	Testis
FBgn0039124	-7.15894	2.57275	275.569	2.1009e-07	1.43545e-05	CG13597	tbrd-1	testis-specifically expressed bromodomain containing protein-1	16.1839	11.3197	11.8636	13.2104	0.0609237	0.101067	0	0.0519722	Testis
FBgn0039129	-3.53348	2.06212	85.1809	1.72059e-05	0.000189649	CG5338	RpS19b	Ribosomal protein S19b	9.13424	7.76039	5.93181	11.0256	0.365542	0.252667	0.800993	1.09142	Testis
FBgn0039147	-5.13603	0.667437	121.383	4.59875e-06	7.1647e-05	CG10694	CG10694		3.86594	2.509	3.24109	3.50583	0.0304618	0.0758	0	0.155917	Testis
FBgn0039190	-10.738	2.27977	1390.57	3.18795e-07	1.68175e-05	CG5762	CG5762		11.5978	10.211	10.5794	10.6191	0	0	0	0	Testis
FBgn0039201	-5.33349	0.220461	65.3102	4.55406e-05	0.000442986	CG13617	CG13617		2.53939	2.15891	2.07919	2.64208	0	0	0.0728176	0.155917	Testis
FBgn0039235	-4.44016	0.284714	29.4682	0.00067332	0.00564852	CG10899	CAH4	Carbonic anhydrase 4	2.46359	2.04221	2.75187	2.43884	0	0	0.0728176	0.363805	Testis
FBgn0039246	-9.56743	1.14473	298.255	1.40385e-05	0.000161321	CG10845	CG10845		5.60941	4.9013	2.99648	5.58901	0	0	0	0	Testis
FBgn0039251	-6.88198	2.14088	212.503	5.62293e-07	2.25759e-05	CG17462	Trf4-2	Topoisomerase related function 4-2	10.385	8.16883	8.31676	11.7369	0.0609237	0.0252667	0	0.155917	Testis
FBgn0039331	-7.65824	1.53278	312.933	1.20781e-07	1.2812e-05	CG11913	ND-49L	NADH dehydrogenase (ubiquinone) 49 kDa subunit-like	7.04966	5.07635	6.72679	6.30033	0.0304618	0.0252667	0	0	Testis
FBgn0039343	-8.47234	1.63146	251.13	2.93394e-07	1.63925e-05	CG5111	CG5111		8.22461	6.06827	5.74835	7.01166	0	0	0	0.0519722	Testis
FBgn0039347	-3.52715	1.03099	62.4036	5.22468e-05	0.000497969	CG5071	CG5071		4.77558	3.61763	4.34184	3.40421	0.152309	0.1516	0.728176	0.207889	Testis
FBgn0039368	-7.89257	-0.410484	200.513	3.5685e-05	0.000357228	CG17196	CG17196		1.66766	1.28367	1.89573	1.1178	0	0	0	0	Testis
FBgn0039369	-6.71008	-0.0467902	149.844	2.02428e-06	4.38993e-05	CG17195	CG17195		1.44025	2.2756	2.26265	1.93075	0.0304618	0	0	0	Testis
FBgn0039373	-9.32606	0.91304	576.681	2.74683e-06	5.19243e-05	CG5024	CG5024		4.43447	3.79267	3.4857	4.4204	0	0	0	0	Testis
FBgn0039376	-8.4692	0.113204	155.344	6.90565e-05	0.000639901	CG14354	CG14354		2.691	1.63377	1.52882	2.99774	0	0	0	0	Testis
FBgn0039395	-6.51713	0.485401	94.2938	1.19598e-05	0.000142488	CG14546	CG14546		3.37323	2.6257	2.14034	3.50583	0	0	0	0.103944	Testis
FBgn0039398	-9.31378	3.16077	273.02	2.30547e-07	1.5028e-05	CG14540	CG14540		22.4755	16.7461	20.4861	20.0696	0.0609237	0	0	0	Testis
FBgn0039421	-9.39257	0.976357	555.922	3.00393e-06	5.54127e-05	CG6036	CG6036		4.54817	4.25946	3.42455	4.67444	0	0	0	0	Testis
FBgn0039425	-7.98829	1.85206	391.507	5.02749e-08	9.79429e-06	CG5432	Ald2	Aldolase 2	8.22461	7.4103	7.88869	8.12946	0.0304618	0.0252667	0	0	Testis
FBgn0039462	-0.724634	2.46443	17.2989	0.00324153	0.0249595	CG14252	CG14252		8.30041	7.2936	8.37792	6.60519	2.80249	2.5014	4.1506	5.61299	Testis
FBgn0039463	-7.12928	2.55783	177.123	1.18871e-06	3.20246e-05	CG18472	Spag1	Spag1 axonemal dynein assembly factor	15.5775	10.9112	11.619	13.8709	0.152309	0.0252667	0	0.0519722	Testis
FBgn0039491	-3.93181	1.80039	111.275	6.36957e-06	8.90797e-05	CG6059	CG6059		8.37621	7.11855	6.05411	7.16409	0.121847	0.328467	0.655358	0.46775	Testis
FBgn0039498	-7.64615	1.52138	285.82	1.74044e-07	1.37868e-05	CG17991	CG17991		6.51904	5.30974	5.32028	7.7738	0.0304618	0.0252667	0	0	Testis
FBgn0039501	-2.43717	3.01074	78.2706	2.32325e-05	0.000242413	CG5987	TTLL6B	Tubulin tyrosine ligase-like 6B	15.5396	15.3457	15.7774	14.1249	1.73632	1.08647	2.33016	4.20975	Testis
FBgn0039511	-10.5057	2.05198	1320.57	3.61815e-07	1.79742e-05	CG3330	CG3330		9.21004	9.27746	8.92829	9.19645	0	0	0	0	Testis
FBgn0039518	-8.77077	2.63785	363.761	7.14401e-08	1.08571e-05	CG13978	CG13978		16.7145	11.4947	13.209	13.8201	0.0304618	0	0	0.0519722	Testis
FBgn0039576	-8.28908	-0.0507276	160.199	6.32115e-05	0.000590564	CG17856	UQCR-14L	Ubiquinol-cytochrome c reductase 14 kDa subunit-like	2.46359	1.57542	1.28421	2.48965	0	0	0	0	Testis
FBgn0039577	-6.91235	0.135572	174.386	1.13926e-06	3.10613e-05	CG12516	CG12516		2.23618	2.15891	1.77343	2.84531	0	0.0252667	0	0	Testis
FBgn0039651	-4.67053	1.35819	189.159	8.34163e-07	2.68714e-05	CG14508	Cyt-c1L	Cytochrome c1-like	6.32954	4.49286	3.73031	6.85923	0.121847	0.101067	0.145635	0.311833	Testis
FBgn0039659	-7.81518	-0.478079	321.973	1.13522e-05	0.000136829	CG14506	CG14506		1.51606	1.22532	1.52882	1.37185	0	0	0	0	Testis
FBgn0039669	-8.87778	0.490758	350.744	9.22177e-06	0.000114435	CG2014	ND-20L	NADH dehydrogenase (ubiquinone) 20 kDa subunit-like	3.44903	2.6257	2.3238	3.40421	0	0	0	0	Testis
FBgn0039694	-5.6009	1.23218	93.1097	1.28579e-05	0.0001505	CG7615	fig	fos intronic gene	5.04089	4.55121	3.66916	6.70681	0.0304618	0.1516	0	0.0519722	Testis
FBgn0039707	-10.0355	1.59542	538.47	3.24706e-06	5.76885e-05	CG15510	Prtl99C	Protamine-like 99C	8.0351	5.36809	5.87066	7.11328	0	0	0	0	Testis
FBgn0039792	-8.89203	3.21489	384.317	6.07852e-08	1.01851e-05	CG2267	CG2267		23.0062	18.7883	18.7127	22.356	0.0609237	0.0252667	0	0	Testis
FBgn0039796	-5.93247	0.759813	134.982	3.10185e-06	5.64097e-05	CG12069	CG12069		3.25952	3.50093	3.05763	4.36959	0.0304618	0.0252667	0.145635	0	Testis
FBgn0039797	-10.7151	2.25759	1017.41	6.8544e-07	2.41124e-05	CG1340	eIF4H2	eukaryotic translation initiation factor 4H2	11.4841	10.036	9.11175	11.6861	0	0	0	0	Testis
FBgn0039799	-6.20678	0.626901	358.962	7.04339e-08	1.08571e-05	CG15543	CG15543		3.37323	2.91744	3.30224	3.3534	0.0304618	0.0252667	0	0.0519722	Testis
FBgn0039812	-8.32431	-0.0230814	169.996	5.463e-05	0.000518505	CG15548	CG15548		1.93297	1.28367	2.2015	2.59127	0	0	0	0	Testis
FBgn0039855	-2.77329	0.633436	79.1565	2.15356e-05	0.00022764	CG1638	CG1638		3.18372	2.04221	3.30224	2.94693	0.213233	0.379	0.436905	0.259861	Testis
FBgn0039881	-1.66895	2.00501	19.0841	0.00250771	0.0195173	CG1971	CG1971		6.06423	6.47672	7.15486	7.2149	0.700622	0.9096	2.25734	3.37819	Testis
FBgn0039887	-9.05235	0.655563	327.852	1.08643e-05	0.000131508	CG2053	CG2053		4.24496	3.09249	2.44611	3.55664	0	0	0	0	Testis
FBgn0040028	-6.42777	-0.296495	137.347	2.81093e-06	5.26969e-05	CG17450	CG17450		1.40235	1.57542	1.40651	2.08317	0.0304618	0	0	0	Testis
FBgn0040031	-6.87303	0.119878	110.382	6.56254e-06	9.09396e-05	CG12061	CG12061		2.7289	1.22532	2.56841	2.33722	0	0	0	0.0519722	Testis
FBgn0040038	-9.07284	0.675166	265.482	1.82707e-05	0.000199065	CG12423	klhl10	kelch like family member 10	4.81348	2.68404	3.24109	2.7945	0	0	0	0	Testis
FBgn0040291	-4.85708	-0.229363	188.691	8.38696e-07	2.68714e-05	CG16988	Roc1b	Regulator of cullins 1b	2.12248	2.04221	1.1619	1.32104	0.0304618	0.0252667	0.0728176	0.0519722	Testis
FBgn0040333	-5.02298	1.02549	89.2983	1.46494e-05	0.000167156	CG13762	brv3	brivido-3	4.73768	4.37616	4.46415	3.50583	0.0304618	0.101067	0	0.259861	Testis
FBgn0040345	-5.35128	-0.121124	134.026	3.06559e-06	5.61712e-05	CG3708	CG3708		1.62976	1.51707	1.95689	2.18479	0	0.0252667	0.0728176	0.0519722	Testis
FBgn0040355	-5.19949	0.323035	107.146	7.32595e-06	9.78592e-05	CG3526	CG3526		2.7289	2.3923	1.89573	3.15017	0	0.0758	0.0728176	0.0519722	Testis
FBgn0040356	-5.32649	-0.573324	97.5255	1.01082e-05	0.000123276	CG12498	CG12498		1.40235	1.16698	1.1619	1.37185	0.0304618	0	0.0728176	0	Testis
FBgn0040365	-5.57142	0.103153	56.5935	7.61603e-05	0.000702856	CG14628	CG14628		2.27408	1.22532	1.83458	3.25179	0.0304618	0	0.145635	0	Testis
FBgn0040368	-6.88456	1.26232	178.466	1.08292e-06	3.03419e-05	CG32859	eIF4E7	eukaryotic translation initiation factor 4E7	6.21583	4.49286	4.34184	5.58901	0	0.0505333	0	0.0519722	Testis
FBgn0040371	-5.60878	2.83621	309.505	1.31913e-07	1.31872e-05	CG12470	CG12470		16.0702	12.3116	16.0832	17.7324	0.274157	0.126333	0.436905	0.207889	Testis
FBgn0040391	-2.78042	0.674044	28.0504	0.000786736	0.00653711	CG2854	CG2854		3.25952	3.26753	2.50726	2.7945	0.152309	0.0758	0.509723	0.831555	Testis
FBgn0040506	-7.27256	0.475572	144.809	2.38282e-06	4.83469e-05	CG17178	ACXE	Adenylyl cyclase X E	3.97965	2.04221	3.42455	2.18479	0.0304618	0	0	0	Testis
FBgn0040508	-9.50981	2.64403	362.605	7.23232e-08	1.08571e-05	CG5983	ACXC	Adenylyl cyclase X C	16.1839	12.8951	12.414	14.0741	0	0	0	0.0519722	Testis
FBgn0040509	-6.38025	-0.320968	117.867	5.05524e-06	7.59425e-05	CG17174	ACXB	Adenylyl cyclase X B	2.04668	1.28367	1.28421	1.6767	0	0	0	0.0519722	Testis
FBgn0040510	-10.5156	2.06208	1134.23	5.25238e-07	2.18798e-05	CG17176	ACXA	Adenylyl cyclase X A	10.3471	8.86902	9.23405	8.43432	0	0	0	0	Testis
FBgn0040519	-7.71102	3.60304	253.697	3.0496e-07	1.65027e-05	CG15219	CG15219		27.0995	23.9814	22.2596	34.9059	0.0304618	0.176867	0.0728176	0.0519722	Testis
FBgn0040524	-3.69292	0.417158	27.1546	0.000870941	0.00718938	CG11052	CG11052		2.27408	2.56735	2.69072	2.89612	0.121847	0	0.0728176	0.519722	Testis
FBgn0040649	-4.85407	0.0826007	47.0893	0.000143562	0.00129126	CG15461	CG15461		2.42569	1.98386	1.52882	2.43884	0	0	0.145635	0.155917	Testis
FBgn0040670	-2.82334	0.0705647	57.5358	6.82775e-05	0.000634237	CG14612	e(y)2b	enhancer of yellow 2b	2.19828	1.92551	1.22305	2.2356	0.0913855	0.2274	0.145635	0.363805	Testis
FBgn0040679	-8.8434	0.456205	285.329	1.52171e-05	0.000171223	CG11373	CG11373		2.5773	2.56735	2.50726	3.86149	0	0	0	0	Testis
FBgn0040694	-5.67841	0.138772	114.034	5.78887e-06	8.33215e-05	CG14974	CG14974		2.691	2.15891	1.58997	2.48965	0	0.0505333	0	0.0519722	Testis
FBgn0040696	-2.7876	0.378825	64.9176	4.41836e-05	0.000431637	CG18675	CG18675		2.31199	2.33395	2.07919	2.84531	0.274157	0.252667	0.0728176	0.415777	Testis
FBgn0040747	-8.82681	1.95442	337.685	9.25042e-08	1.26408e-05	CG12853	CG12853		9.66486	7.99378	7.03256	9.39969	0	0.0252667	0	0	Testis
FBgn0040763	-1.61235	1.56463	59.7813	5.89965e-05	0.000554841	CG18336	CG18336		4.32076	4.55121	5.44259	5.18253	0.974779	0.8338	1.38353	2.02691	Testis
FBgn0040784	-8.54998	0.183872	206.419	3.35306e-05	0.000337448	CG15323	karr	karr	2.50149	1.51707	2.87418	2.48965	0	0	0	0	Testis
FBgn0040812	-8.60597	0.234944	511.912	3.67341e-06	6.19997e-05	CG8750	CG8750		2.38779	2.33395	2.62956	2.43884	0	0	0	0	Testis
FBgn0040814	-9.19987	0.792368	389.375	7.15319e-06	9.64702e-05	CG14113	CG14113		3.86594	2.80074	3.91377	4.16635	0	0	0	0	Testis
FBgn0040816	-8.39743	0.0461061	243.185	2.2403e-05	0.000235055	CG12521	CG12521		2.38779	1.69212	1.71227	2.64208	0	0	0	0	Testis
FBgn0040904	-8.90652	0.513047	266.121	1.8015e-05	0.000196656	CG15577	CG15577		2.691	2.56735	4.15838	2.64208	0	0	0	0	Testis
FBgn0040905	-6.51057	-0.212064	90.9686	1.3376e-05	0.000155385	CG15578	CG15578		1.13704	1.40037	1.77343	2.59127	0	0	0	0.0519722	Testis
FBgn0040963	-9.34169	2.49868	280.867	1.99329e-07	1.3932e-05	CG18662	CG18662		12.5454	12.0782	11.7413	13.7185	0	0	0.0728176	0	Testis
FBgn0040989	-8.2585	-0.0828674	366.461	8.28991e-06	0.000107334	CG5693	CG5693		1.93297	1.63377	2.07919	2.03237	0	0	0	0	Testis
FBgn0040996	-7.22616	1.15235	109.448	7.11504e-06	9.60699e-05	CG12617	CG12617		4.92718	3.67597	3.97492	6.45276	0	0	0	0.103944	Testis
FBgn0041102	-12.1291	3.65344	1415.13	3.05398e-07	1.65027e-05	CG7929	ocn	ocnus	28.0849	25.3817	25.7453	33.4324	0	0	0	0	Testis
FBgn0041195	-5.84253	3.17327	772.211	3.5378e-09	6.16818e-06	CG6504	Pkd2	Polycystic kidney disease 2	22.7029	17.0378	19.1408	20.3745	0.304618	0.176867	0.218453	0.363805	Testis
FBgn0041337	-2.58834	0.26464	33.1782	0.000449876	0.00385676	CG18559	Cyp309a2	Cyp309a2	2.19828	1.80881	1.40651	3.15017	0.0913855	0.3032	0.218453	0.519722	Testis
FBgn0042126	-0.904429	1.52199	24.9513	0.00109258	0.00890233	CG18788	CG18788		5.15459	3.38423	4.28069	3.55664	1.49263	1.38967	1.74762	2.33875	Testis
FBgn0042131	-2.02203	0.224458	60.3905	5.69143e-05	0.00053704	CG18808	CG18808		1.70556	2.33395	1.89573	1.93075	0.274157	0.4548	0.29127	0.415777	Testis
FBgn0042133	-3.69322	1.54458	204.872	6.1247e-07	2.32329e-05	CG18810	CG18810		5.83682	5.65983	5.87066	6.30033	0.243695	0.2274	0.364088	0.675638	Testis
FBgn0042178	-1.2425	3.10279	30.2281	0.000605904	0.00510183	CG32165	Apl	Apollo	13.4171	12.8951	13.3313	14.3282	6.12283	3.05727	3.85933	4.6775	Testis
FBgn0042189	-10.4514	3.59005	401.515	5.26159e-08	9.94616e-06	CG17376	CG17376		27.5922	26.3153	24.3999	29.5201	0	0	0.0728176	0	Testis
FBgn0042198	-6.59199	-0.154351	127.517	3.76854e-06	6.27647e-05	CG16741	CG16741		1.81927	2.45065	1.10075	1.87994	0	0.0252667	0	0	Testis
FBgn0042710	-6.00176	1.76444	89.1083	1.51269e-05	0.000170702	CG32849	Hex-t2	Hex-t2	8.073	6.59341	5.6872	9.04403	0.152309	0.101067	0	0	Testis
FBgn0042711	-3.29352	-0.286753	53.657	8.81279e-05	0.000808041	CG33102	Hex-t1	Hex-t1	1.97087	1.16698	1.46766	1.37185	0.152309	0.101067	0	0.155917	Testis
FBgn0043025	-2.52746	2.16042	126.208	3.84155e-06	6.37933e-05	CG32178	Adgf-A2	Adenosine deaminase-related growth factor A2	7.92139	9.39416	8.56137	7.87542	1.34032	0.6064	1.38353	1.35128	Testis
FBgn0043865	-5.55839	1.1293	179.568	1.03613e-06	2.97515e-05	CG13916	SA-2	Stromalin-2	5.19249	3.73432	4.34184	5.18253	0.0304618	0.0252667	0.145635	0.155917	Testis
FBgn0045770	-13.4718	4.98962	2088.3	1.17592e-07	1.2812e-05	CG32063	S-Lap3	Sperm-Leucylaminopeptidase 3	80.6163	63.3084	65.1276	77.0775	0	0	0	0	Testis
FBgn0045843	-5.72974	0.165831	79.4757	2.21461e-05	0.000233006	CG2595	RacGAP84C	Rac GTPase activating protein at 84C	2.38779	2.2756	1.89573	2.59127	0	0.0758	0	0	Testis
FBgn0046294	-13.5896	5.10698	2763.06	5.91464e-08	1.01803e-05	CG12699	CG12699		78.7212	74.0446	71.9767	85.6134	0	0	0	0	Testis
FBgn0046297	-10.3627	1.91266	785.332	1.29161e-06	3.30688e-05	CR9284	lncRNA:CR9284	long non-coding RNA:CR9284	8.26251	9.10241	6.66564	9.14565	0	0	0	0	Testis
FBgn0046332	-4.4466	2.28006	34.776	0.000395094	0.00339997	CG31003	gskt	gasket	10.9914	9.51085	8.98944	11.5337	0.0609237	0.0505333	0.582541	1.09142	Testis
FBgn0046793	-3.55681	1.90974	293.331	1.53983e-07	1.33318e-05	CG32236	CG32236		8.1488	7.35195	7.15486	7.82461	0.426466	0.353733	0.800993	0.519722	Testis
FBgn0046873	-8.77781	0.398028	259.279	1.9187e-05	0.000207059	CG31483	Pif2	PFTAIRE-interacting factor 2	3.29742	2.68404	1.83458	3.20098	0	0	0	0	Testis
FBgn0047338	-9.26579	0.854582	450.644	5.01194e-06	7.5492e-05	CG32148	CG32148		3.71434	3.32588	3.73031	4.67444	0	0	0	0	Testis
FBgn0047351	-11.4933	3.02387	715.17	1.74507e-06	4.0067e-05	CG31468	CG31468		19.216	15.6958	14.5543	23.0165	0	0	0	0	Testis
FBgn0050037	-7.89466	-0.409698	275.396	1.6581e-05	0.000184013	CG30037	CG30037		1.47816	1.34202	1.83458	1.32104	0	0	0	0	Testis
FBgn0050039	-11.1375	2.67278	1189.9	4.6706e-07	2.05657e-05	CG30039	CG30039		16.4492	12.4283	13.209	14.633	0	0	0	0	Testis
FBgn0050048	-8.27116	1.4367	252.42	2.8516e-07	1.61726e-05	CG30048	CG30048		6.78435	5.54314	5.25913	5.94467	0	0	0	0.0519722	Testis
FBgn0050056	-2.42442	0.253407	27.2276	0.000848274	0.0070176	CG30056	CG30056		2.00877	2.10056	1.46766	2.74369	0.152309	0.101067	0.582541	0.571694	Testis
FBgn0050065	-7.03278	0.969732	184.932	9.39385e-07	2.84402e-05	CG30065	CG30065		4.92718	3.96772	3.4857	4.31878	0	0.0252667	0.0728176	0	Testis
FBgn0050103	-8.71555	0.341686	178.848	4.91805e-05	0.000473118	CG30103	CG30103		3.97965	1.86716	2.50726	2.18479	0	0	0	0	Testis
FBgn0050110	-5.93334	-0.730414	141.829	2.47731e-06	4.89506e-05	CG30110	CG30110		1.13704	1.16698	1.10075	1.16861	0	0.0252667	0	0	Testis
FBgn0050156	-1.68019	2.69856	39.4845	0.000252355	0.0022102	CG30156	CG30156		11.6736	10.6778	11.5579	10.1618	1.6754	1.54127	3.34961	4.93736	Testis
FBgn0050161	-4.20031	-0.375353	53.7482	8.82683e-05	0.000808674	CG30161	CG30161		1.62976	1.28367	1.40651	1.52427	0.121847	0.0505333	0	0	Testis
FBgn0050177	-3.46454	1.18307	23.7237	0.00132026	0.0106503	CG30177	CG30177		5.3441	4.14276	4.95337	3.55664	0.0609237	0.0505333	0.436905	0.987471	Testis
FBgn0050184	-6.40978	-0.313194	152.723	1.87326e-06	4.17416e-05	CG30184	CG30184		1.47816	1.45872	1.83458	1.62589	0.0304618	0	0	0	Testis
FBgn0050192	-8.74822	0.365704	394.55	6.92709e-06	9.43568e-05	CG30192	CG30192		2.19828	3.20918	2.62956	2.7945	0	0	0	0	Testis
FBgn0050222	-8.1049	1.25417	278.144	1.90424e-07	1.37868e-05	CG30222	CG30222		4.58607	4.9013	5.19798	5.94467	0	0.0252667	0	0	Testis
FBgn0050268	-9.67991	1.25022	796.071	1.24941e-06	3.2831e-05	CG30268	CG30268		5.00299	4.95965	5.38144	5.28415	0	0	0	0	Testis
FBgn0050271	-6.61447	1.40456	191.862	8.22713e-07	2.68714e-05	CG30271	CG30271		6.59485	5.48479	5.25913	5.48739	0.0304618	0	0.0728176	0.103944	Testis
FBgn0050275	-9.52799	1.1051	788.542	1.27879e-06	3.29638e-05	CG30275	CG30275		4.92718	4.43451	4.58645	4.62363	0	0	0	0	Testis
FBgn0050278	-5.99843	0.813935	143.637	2.4567e-06	4.86281e-05	CG30278	CG30278		3.41113	2.97579	3.85262	4.52201	0	0.0252667	0.0728176	0.103944	Testis
FBgn0050284	-8.01812	-0.295607	153.735	6.90281e-05	0.000639901	CG30284	CG30284		1.97087	1.05028	1.40651	2.03237	0	0	0	0	Testis
FBgn0050293	-5.96114	2.35916	320.175	1.13551e-07	1.2812e-05	CG30293	Cht12	Chitinase 12	12.2422	10.7362	9.47866	12.3466	0.152309	0.1516	0.145635	0.0519722	Testis
FBgn0050324	-4.31944	1.63442	177.422	1.06742e-06	3.01912e-05	CG30324	CG30324		7.35287	5.25139	4.95337	8.28189	0.274157	0.126333	0.218453	0.415777	Testis
FBgn0050325	-8.77492	0.394895	401.079	6.6559e-06	9.18385e-05	CG30325	CG30325		3.37323	2.74239	2.2015	2.69288	0	0	0	0	Testis
FBgn0050334	-1.65273	0.505849	14.0819	0.00578631	0.0428663	CG30334	CG30334		1.70556	2.74239	1.10075	3.55664	0.365542	0.379	0.509723	1.14339	Testis
FBgn0050350	-3.74113	1.33498	147.813	2.11958e-06	4.51885e-05	CG30350	CG30350		5.68521	5.018	4.46415	5.23334	0.152309	0.3032	0.509723	0.259861	Testis
FBgn0050354	-1.66253	1.23532	16.9213	0.00350544	0.026864	CG30354	UQCR-11L	Ubiquinol-cytochrome c reductase 11 kDa subunit-like	3.37323	3.85102	3.66916	4.67444	1.30986	1.11173	0.582541	0.519722	Testis
FBgn0050355	-7.68926	0.865937	240.526	3.33206e-07	1.73359e-05	CG30355	CG30355		4.32076	3.44258	3.60801	4.16635	0.0304618	0	0	0	Testis
FBgn0050362	-9.71422	1.28473	688.805	1.77982e-06	4.02928e-05	CG30362	boly	borrelly	6.25373	4.84295	5.01452	5.0301	0	0	0	0	Testis
FBgn0050376	-11.1036	2.63936	1072.67	6.02163e-07	2.29957e-05	CG30376	CG30376		15.3501	12.0199	12.5975	15.3952	0	0	0	0	Testis
FBgn0050378	-9.59163	1.16837	365.87	8.32248e-06	0.000107468	CG30378	CG30378		6.25373	4.37616	3.54686	5.23334	0	0	0	0	Testis
FBgn0050391	-5.66325	-0.322628	146.361	2.20007e-06	4.64038e-05	CG30391	CG30391		1.47816	1.34202	2.01804	1.47347	0.0304618	0.0252667	0	0	Testis
FBgn0050393	-10.1661	1.72118	944.91	8.21423e-07	2.68714e-05	CG30393	CG30393		7.42868	7.11855	6.54334	7.82461	0	0	0	0	Testis
FBgn0050401	-3.71639	-0.289857	30.8452	0.000582171	0.00491659	CG30401	dany	distal antenna-young	1.89507	1.10863	1.46766	1.62589	0	0.1516	0	0.155917	Testis
FBgn0050412	-8.98233	0.589285	396.898	6.82779e-06	9.3754e-05	CG30412	CG30412		4.01755	2.97579	2.56841	3.15017	0	0	0	0	Testis
FBgn0050416	-7.85248	-0.44521	370.782	8.05698e-06	0.000105158	CG30416	CG30416		1.55396	1.57542	1.40651	1.27023	0	0	0	0	Testis
FBgn0050417	-8.13758	-0.189764	197.85	3.68525e-05	0.000367942	CG30417	tbrd-3	testis-specifically expressed bromodomain containing protein-3	1.89507	1.45872	1.34536	2.33722	0	0	0	0	Testis
FBgn0050429	-7.09194	0.300938	144.307	2.4011e-06	4.83639e-05	CG30429	CG30429		3.03211	1.51707	2.99648	2.64208	0	0.0252667	0	0	Testis
FBgn0050430	-8.40964	2.28324	251.06	3.0044e-07	1.65027e-05	CG30430	CG30430		10.2713	8.34388	9.23405	14.9887	0.0304618	0	0	0.0519722	Testis
FBgn0050432	-6.98071	0.197815	171.928	1.20242e-06	3.22112e-05	CG30432	CG30432		2.23618	2.6257	1.71227	2.89612	0	0.0252667	0	0	Testis
FBgn0050447	-9.21142	0.804759	305.251	1.29203e-05	0.000151075	CG30447	CG30447		4.20706	2.85909	3.11879	4.67444	0	0	0	0	Testis
FBgn0050472	-7.45699	0.661516	187.446	8.81542e-07	2.75708e-05	CG30472	CG30472		3.94175	3.67597	2.56841	3.20098	0	0	0	0.0519722	Testis
FBgn0050485	-8.2615	-0.0766233	289.218	1.4726e-05	0.000167693	CG30485	CG30485		2.42569	1.75046	1.52882	1.98156	0	0	0	0	Testis
FBgn0050487	-6.27468	1.74533	125.766	4.25842e-06	6.83403e-05	CG30487	CG30487		7.80769	6.76846	6.66564	7.82461	0.152309	0.0252667	0.0728176	0	Testis
FBgn0051007	-4.54758	1.42968	31.6034	0.000538576	0.0045586	CG31007	CG31007		6.48114	5.36809	4.89221	5.63981	0.0913855	0	0.728176	0.155917	Testis
FBgn0051008	-2.71263	-0.121438	56.0697	7.39873e-05	0.000683359	CG31008	CG31008		1.70556	1.63377	1.65112	1.47347	0.152309	0.0758	0.436905	0.207889	Testis
FBgn0051010	-5.59426	0.415482	183.217	9.38335e-07	2.84402e-05	CG31010	CG31010		2.91841	2.91744	2.62956	2.54046	0.0609237	0.0252667	0.0728176	0	Testis
FBgn0051013	-3.77313	1.86515	116.801	5.3211e-06	7.8481e-05	CG31013	CG31013		8.64152	6.82681	7.82754	6.656	0.609237	0.404267	0.29127	0.259861	Testis
FBgn0051025	-10.2418	4.09274	624.699	8.99328e-09	6.16818e-06	CG31025	Ppi1	Protein phosphatase 1c interacting protein 1	40.9335	35.7678	36.0189	40.4441	0.0304618	0	0	0.0519722	Testis
FBgn0051029	-3.89686	2.73386	84.2074	1.85653e-05	0.000201763	CG31029	CG31029		14.1372	13.1868	14.0651	14.2266	0.792008	1.03593	0.364088	0.415777	Testis
FBgn0051050	-8.2148	-0.121549	246.909	2.15951e-05	0.000228056	CG31050	CG31050		2.19828	1.69212	2.2015	1.37185	0	0	0	0	Testis
FBgn0051055	-10.185	1.73912	1023.88	6.74883e-07	2.40708e-05	CG31055	CG31055		7.08756	7.70204	6.8491	7.67218	0	0	0	0	Testis
FBgn0051068	-9.33971	0.926953	404.513	6.51928e-06	9.05039e-05	CG31068	CG31068		5.23039	3.26753	3.97492	3.81069	0	0	0	0	Testis
FBgn0051088	-7.48356	0.666297	219.926	4.69829e-07	2.05657e-05	CG31088	CG31088		3.90385	2.80074	2.93533	3.75988	0	0.0252667	0	0	Testis
FBgn0051093	-9.26758	0.857313	428.314	5.6723e-06	8.21651e-05	CG31093	CG31093		4.01755	3.73432	3.05763	4.67444	0	0	0	0	Testis
FBgn0051099	-7.0944	0.307144	142.393	2.52521e-06	4.93809e-05	CG31099	CG31099		3.71434	2.21725	1.65112	2.64208	0	0.0252667	0	0	Testis
FBgn0051128	-8.76913	0.387118	376.038	7.78593e-06	0.000102446	CG31128	CG31128		2.88051	2.15891	3.05763	2.84531	0	0	0	0	Testis
FBgn0051139	-8.31508	-0.0287822	251.067	2.07404e-05	0.000220344	CG31139	CG31139		2.42569	1.45872	1.89573	2.18479	0	0	0	0	Testis
FBgn0051141	-8.88031	0.492308	472.217	4.47226e-06	7.03528e-05	CG31141	CG31141		3.48693	2.56735	2.93533	2.84531	0	0	0	0	Testis
FBgn0051161	-5.06877	1.66767	371.007	6.19618e-08	1.01851e-05	CG31161	CG31161		7.76979	6.47672	6.23757	6.55438	0.121847	0.0758	0.218453	0.259861	Testis
FBgn0051204	-10.2285	1.78232	714.969	1.62482e-06	3.83133e-05	CG31204	CG31204		8.26251	6.65176	6.66564	8.58674	0	0	0	0	Testis
FBgn0051206	-8.5999	1.7324	334.177	9.51681e-08	1.26988e-05	CG31206	CG31206		6.93596	6.65176	7.82754	7.67218	0	0.0252667	0	0	Testis
FBgn0051213	-10.4263	1.97403	1123.09	5.38094e-07	2.21617e-05	CG31213	CG31213		8.0351	9.39416	8.43907	8.78998	0	0	0	0	Testis
FBgn0051226	-10.1277	3.25261	330.915	1.10527e-07	1.2812e-05	CG31226	CG31226		17.7379	18.7883	18.835	29.5201	0	0	0	0.0519722	Testis
FBgn0051231	-5.7964	1.72519	187.396	8.99812e-07	2.78084e-05	CG31231	CG31231		7.88349	6.18497	6.42103	8.02784	0.121847	0.101067	0	0.103944	Testis
FBgn0051244	-2.95001	1.40256	56.8078	7.27419e-05	0.000672952	CG31244	CG31244		4.58607	5.19304	4.46415	6.0971	0.182771	0.353733	0.946629	0.779583	Testis
FBgn0051245	-2.83029	0.35153	31.9177	0.000515283	0.00438764	CG31245	CG31245		2.34989	2.68404	1.83458	2.48965	0.152309	0.0505333	0.364088	0.623666	Testis
FBgn0051281	-8.69098	2.55911	381.341	5.8932e-08	1.01803e-05	CG31281	Tpl94D	Transition protein-like 94D	14.7816	11.7281	13.5759	12.1942	0.0304618	0	0	0.0519722	Testis
FBgn0051286	-6.60195	1.641	102.388	9.11601e-06	0.00011387	CG31286	CG31286		7.42868	7.2936	5.87066	6.50357	0.121847	0	0.0728176	0	Testis
FBgn0051287	-4.95369	1.96852	214.565	5.28573e-07	2.18798e-05	CG31287	CG31287		7.35287	7.11855	8.56137	10.3143	0.182771	0.2274	0.29127	0.103944	Testis
FBgn0051294	-10.004	1.56294	861.522	1.02982e-06	2.97207e-05	CG31294	CG31294		5.87472	6.53506	6.66564	6.75762	0	0	0	0	Testis
FBgn0051320	-0.87793	4.4358	13.9567	0.00592578	0.0437566	CG31320	HEATR2	HEAT repeat containing 2	33.6565	32.9671	29.9648	29.6725	7.55454	9.3234	20.753	18.71	Testis
FBgn0051327	-10.5824	2.12755	1019.24	6.82433e-07	2.41124e-05	CG31327	CG31327		10.4229	9.21911	8.43907	10.5175	0	0	0	0	Testis
FBgn0051347	-6.98001	0.198728	174.508	1.13623e-06	3.10532e-05	CG31347	CG31347		2.6152	2.2756	1.71227	2.84531	0	0.0252667	0	0	Testis
FBgn0051361	-2.136	2.81025	142.829	2.41257e-06	4.84307e-05	CG31361	dpr17	defective proboscis extension response 17	13.6445	10.7362	14.0651	12.4482	1.85817	1.61707	2.33016	3.58608	Testis
FBgn0051391	-4.08283	1.7943	114.302	5.76625e-06	8.32072e-05	CG31391	CG31391		7.9972	6.53506	6.66564	7.51975	0.121847	0.202133	0.582541	0.571694	Testis
FBgn0051406	-9.84969	1.41535	482.504	4.2434e-06	6.82676e-05	CG31406	CG31406		7.31497	5.018	6.17642	4.72525	0	0	0	0	Testis
FBgn0051445	-2.83745	1.66659	178.812	1.02948e-06	2.97207e-05	CG31445	CG31445		5.87472	6.00993	5.99296	6.55438	0.548313	0.480066	0.582541	1.14339	Testis
FBgn0051459	-6.26291	1.00123	165.122	1.44861e-06	3.56403e-05	CG31459	CG31459		4.66187	3.96772	4.09723	4.31878	0.0609237	0.0505333	0	0	Testis
FBgn0051465	-5.19307	1.6721	104.691	8.32871e-06	0.000107468	CG31465	CG31465		7.31497	6.12662	5.74835	7.97704	0.152309	0.0252667	0.0728176	0.363805	Testis
FBgn0051473	-2.38879	1.58403	41.0973	0.000221408	0.00195577	CG31473	CG31473		6.06423	4.72625	4.95337	6.30033	1.34032	0.429533	0.509723	0.935499	Testis
FBgn0051477	-2.78485	-0.216273	148.127	2.10267e-06	4.49362e-05	CG31477	ATPsynepsilonL	ATP synthase, epsilon subunit-like	1.62976	1.57542	1.40651	1.47347	0.182771	0.101067	0.145635	0.259861	Testis
FBgn0051482	-7.92495	1.10312	196.662	7.46493e-07	2.54773e-05	CG31482	CG31482		4.32076	3.67597	4.6476	5.79224	0	0	0	0.0519722	Testis
FBgn0051501	-9.05602	0.656425	618.79	2.31261e-06	4.72895e-05	CG31501	nxf4	nuclear export factor 4	3.52483	3.09249	3.30224	3.45502	0	0	0	0	Testis
FBgn0051525	-9.86445	1.42898	860.109	1.03397e-06	2.97515e-05	CG31525	CG31525		6.21583	5.77653	5.32028	6.14791	0	0	0	0	Testis
FBgn0051528	-10.1165	1.67462	434.382	5.48128e-06	8.01143e-05	CG31528	CG31528		8.98263	5.83488	5.44259	7.67218	0	0	0	0	Testis
FBgn0051533	-9.97385	1.53411	664.103	1.94595e-06	4.26518e-05	CG31533	CG31533		6.74645	6.06827	7.27717	5.23334	0	0	0	0	Testis
FBgn0051538	-2.36519	3.90645	36.6738	0.000331931	0.00287826	CG31538	CG31538		29.1462	29.4661	27.8245	26.3699	1.85817	2.07187	6.40795	8.36752	Testis
FBgn0051546	-3.70968	0.00417022	116.155	5.23993e-06	7.73845e-05	CG31546	CG31546		2.27408	1.51707	1.52882	2.28641	0.152309	0.0505333	0.145635	0.103944	Testis
FBgn0051601	-7.96076	2.34129	376.514	6.13373e-08	1.01851e-05	CG31601	CG31601		10.8777	10.3861	11.8025	11.6353	0	0.0252667	0.0728176	0.0519722	Testis
FBgn0051624	-9.1311	0.72829	422.671	5.85845e-06	8.42162e-05	CG31624	CG31624		3.82804	3.20918	2.87418	4.16635	0	0	0	0	Testis
FBgn0051639	-11.278	2.81102	540.933	3.46411e-06	5.92221e-05	CG31639	CG31639		14.4404	13.4202	13.0867	21.3906	0	0	0	0	Testis
FBgn0051644	-9.44829	1.02781	741.494	1.48638e-06	3.6101e-05	CG31644	CG31644		4.16916	4.6679	4.58645	4.16635	0	0	0	0	Testis
FBgn0051679	-6.95895	0.198536	169.578	1.26694e-06	3.29104e-05	CG31679	Tengl3	Testis EndoG-Like 3	2.84261	2.2756	2.2015	2.13398	0	0	0	0.0519722	Testis
FBgn0051682	-3.3487	0.875134	65.273	4.43314e-05	0.000432708	CG31682	Tengl1	Testis EndoG-Like 1	3.86594	3.44258	3.4857	3.50583	0.0913855	0.1516	0.364088	0.623666	Testis
FBgn0051693	-6.02788	0.0369299	126.293	3.92459e-06	6.46987e-05	CG31693	CG31693		2.23618	1.63377	2.01804	2.38803	0	0.0252667	0.0728176	0	Testis
FBgn0051697	-1.88874	0.769304	63.3405	4.80411e-05	0.000463729	CG31697	CG31697		2.16038	3.32588	2.75187	3.25179	0.456928	0.404267	0.800993	0.883527	Testis
FBgn0051703	-8.73761	0.363291	67.1354	0.00052168	0.00443545	CG31703	tplus3b	testis-specific Plus3 domain b	4.73768	1.69212	3.11879	1.16861	0	0	0	0	Testis
FBgn0051709	-9.82989	2.93964	499.148	2.07521e-08	7.91206e-06	CG31709	CG31709		16.2218	16.2793	16.5724	19.2567	0	0.0252667	0	0	Testis
FBgn0051730	-7.61339	-0.654035	272.494	1.70118e-05	0.000187875	CG31730	CG31730		1.32655	1.10863	1.40651	1.06699	0	0	0	0	Testis
FBgn0051735	-10.0012	1.56167	680.476	1.83352e-06	4.10985e-05	CG31735	CG31735		7.65609	5.54314	6.54334	6.04629	0	0	0	0	Testis
FBgn0051740	-12.6108	4.1321	1143.56	5.5773e-07	2.25759e-05	CG31740	CG31740		38.2804	37.1682	32.6555	49.2341	0	0	0	0	Testis
FBgn0051742	-7.7599	1.62571	177.839	1.10868e-06	3.07449e-05	CG31742	Prosbeta5R2	Proteasome beta5 subunit-related 2	8.48992	6.36002	6.05411	6.04629	0	0.0505333	0	0	Testis
FBgn0051752	-7.70223	0.890032	207.586	5.97467e-07	2.28935e-05	CG31752	CG31752		3.52483	3.67597	4.46415	4.16635	0	0	0	0.0519722	Testis
FBgn0051773	-5.39642	1.3061	93.9163	1.23993e-05	0.000147105	CG31773	CG31773		5.83682	6.00993	4.70876	4.4712	0.0913855	0	0.145635	0.207889	Testis
FBgn0051776	-6.82095	0.728778	136.854	2.94583e-06	5.45941e-05	CG31776	CG31776		3.75224	2.85909	3.79147	3.60745	0	0.0505333	0	0	Testis
FBgn0051787	-9.40521	0.989344	520.475	3.52775e-06	5.98978e-05	CG31787	CG31787		5.3062	4.14276	3.60801	4.01392	0	0	0	0	Testis
FBgn0051788	-8.58603	2.47596	293.419	1.64631e-07	1.37868e-05	CG31788	CG31788		13.3034	11.2613	11.619	13.0579	0.0304618	0	0.0728176	0	Testis
FBgn0051798	-9.52638	1.10328	547.966	3.11148e-06	5.64646e-05	CG31798	CG31798		4.69977	3.85102	4.83106	5.13172	0	0	0	0	Testis
FBgn0051802	-7.1815	1.93227	636.853	7.52891e-09	6.16818e-06	CG31802	CG31802		9.51325	6.76846	7.33832	9.70455	0.0304618	0.0252667	0.0728176	0.0519722	Testis
FBgn0051803	-6.65826	1.08425	252.879	2.72963e-07	1.59559e-05	CG31803	CG31803		4.69977	4.49286	4.83106	4.11554	0	0.0252667	0.0728176	0.0519722	Testis
FBgn0051804	-6.27802	0.28407	125.071	4.11308e-06	6.68627e-05	CG31804	CG31804		2.88051	2.10056	2.26265	2.74369	0	0	0.0728176	0.0519722	Testis
FBgn0051805	-8.11765	1.99206	330.278	1.00711e-07	1.2812e-05	CG31805	CG31805		9.66486	7.64369	8.43907	9.19645	0	0.0252667	0	0.0519722	Testis
FBgn0051806	-8.60581	0.235168	332.863	1.04715e-05	0.000126889	CG31806	CG31806		2.19828	2.74239	1.95689	2.89612	0	0	0	0	Testis
FBgn0051807	-4.8322	0.207581	74.7235	2.74615e-05	0.000282127	CG31807	CG31807		3.03211	1.57542	2.07919	2.54046	0	0.101067	0.0728176	0.0519722	Testis
FBgn0051820	-11.7539	3.28161	1527.44	2.53249e-07	1.53602e-05	CG31820	CG31820		24.7117	19.0217	20.3027	22.9149	0	0	0	0	Testis
FBgn0051848	-5.9714	0.396985	156.216	1.75066e-06	4.0067e-05	CG31848	CG31848		2.91841	2.509	2.62956	2.84531	0.0609237	0.0252667	0	0	Testis
FBgn0051851	-4.13579	-0.0177885	126.911	3.76237e-06	6.27542e-05	CG31851	Naa20B	N(alpha)-acetyltransferase 20 B	2.23618	1.28367	1.95689	2.13398	0.0304618	0.0758	0.145635	0.103944	Testis
FBgn0051860	-4.42711	0.499898	123.973	4.16785e-06	6.76276e-05	CG31860	ZnT33D	Zinc transporter 33D	3.52483	2.10056	2.75187	2.99774	0.0304618	0.101067	0.0728176	0.207889	Testis
FBgn0051861	-6.7217	0.674123	113.199	6.0156e-06	8.5393e-05	CG31861	CG31861		3.56273	3.15083	3.4857	3.25179	0	0	0	0.103944	Testis
FBgn0051870	-10.6277	2.17132	868.53	1.00961e-06	2.95129e-05	CG31870	CG31870		9.24794	9.5692	9.1729	11.7877	0	0	0	0	Testis
FBgn0051874	-3.8225	1.05064	60.7694	5.83364e-05	0.000549088	CG31874	Fum4	Fumarase 4	4.24496	4.55121	3.60801	4.36959	0.274157	0.202133	0	0.363805	Testis
FBgn0051882	-7.17669	0.385089	208.979	5.67666e-07	2.25759e-05	CG31882	CG31882		2.88051	2.6257	2.38495	2.99774	0.0304618	0	0	0	Testis
FBgn0051907	-5.03034	3.2367	28.3637	0.000759723	0.00634053	CG31907	Mst27D	Male specific transcript 27D	22.8925	19.0217	18.2846	21.7971	1.0357	0.5306	0	0	Testis
FBgn0051909	-3.64212	1.66338	128.228	3.69084e-06	6.21091e-05	CG31909	CG31909		5.83682	5.89323	6.23757	7.67218	0.304618	0.353733	0.728176	0.259861	Testis
FBgn0051910	-6.53198	1.26223	144.191	2.43896e-06	4.86144e-05	CG31910	CG31910		5.76101	4.9013	4.5253	5.43658	0.0913855	0.0252667	0	0	Testis
FBgn0051913	-8.47863	0.120181	392.214	7.02787e-06	9.52332e-05	CG31913	CG31913		2.691	2.3923	1.95689	1.93075	0	0	0	0	Testis
FBgn0051921	-9.60262	1.1752	628.573	2.22569e-06	4.65753e-05	CG31921	CG31921		4.16916	5.07635	5.07567	5.23334	0	0	0	0	Testis
FBgn0051933	-9.78095	1.34899	405.33	6.48734e-06	9.01708e-05	CG31933	CG31933		6.74645	4.02607	5.99296	5.33496	0	0	0	0	Testis
FBgn0051948	-11.7374	3.26524	2058.3	1.21842e-07	1.2812e-05	CG31948	CG31948		23.5368	21.414	18.9573	22.1528	0	0	0	0	Testis
FBgn0051949	-9.67707	1.25013	389.051	7.16766e-06	9.65507e-05	CG31949	CG31949		6.44324	5.07635	3.60801	5.48739	0	0	0	0	Testis
FBgn0051952	-5.96986	0.397513	134.142	3.15823e-06	5.67681e-05	CG31952	CG31952		3.29742	2.91744	1.89573	2.7945	0.0609237	0.0252667	0	0	Testis
FBgn0051960	-3.82111	0.325411	62.8686	5.08912e-05	0.000487919	CG31960	CG31960		2.53939	2.3923	2.3238	2.54046	0.121847	0.0252667	0.0728176	0.363805	Testis
FBgn0051988	-11.749	3.27662	1120.14	5.41924e-07	2.21617e-05	CG31988	CG31988		20.8837	20.3054	18.8962	26.4716	0	0	0	0	Testis
FBgn0052006	-3.23557	0.527744	118.605	4.84712e-06	7.38925e-05	CG32006	CG32006		2.16038	2.10056	2.93533	3.81069	0.182771	0.2274	0.218453	0.259861	Testis
FBgn0052061	-6.98129	0.204005	201.613	6.51212e-07	2.35976e-05	CG32061	CG32061		2.50149	2.6257	2.3238	2.08317	0.0304618	0	0	0	Testis
FBgn0052064	-11.5932	4.72571	452.025	3.33471e-08	9.34652e-06	CG32064	S-Lap4	Sperm-Leucylaminopeptidase 4	71.2926	53.7392	52.0409	61.225	0	0	0.0728176	0	Testis
FBgn0052081	-11.045	2.58152	1147.26	5.10742e-07	2.13758e-05	CG32081	CG32081		14.0614	13.1285	11.1298	14.8871	0	0	0	0	Testis
FBgn0052086	-5.33287	-0.165805	219.784	4.67948e-07	2.05657e-05	CG32086	CG32086		2.00877	1.98386	1.34536	1.72751	0.0304618	0.0252667	0	0.0519722	Testis
FBgn0052087	-8.86378	0.476518	397.536	6.80118e-06	9.35018e-05	CG32087	CG32087		3.18372	2.3923	2.75187	3.3534	0	0	0	0	Testis
FBgn0052106	-8.30329	1.46553	247.395	3.0939e-07	1.65027e-05	CG32106	CG32106		5.11669	6.06827	6.60449	6.24952	0	0	0	0.0519722	Testis
FBgn0052110	-1.54851	1.94459	20.0692	0.00213958	0.0168756	CG32110	CG32110		6.21583	6.18497	6.42103	6.45276	0.761546	1.71813	2.98552	1.45522	Testis
FBgn0052117	-6.26753	-0.421011	110.56	6.41428e-06	8.95946e-05	CG32117	CG32117		1.70556	1.16698	1.1619	1.77832	0	0	0	0.0519722	Testis
FBgn0052119	-8.675	1.84862	209.449	5.94169e-07	2.28935e-05	CG32119	CG32119		8.37621	6.53506	7.15486	9.4505	0	0	0.0728176	0	Testis
FBgn0052141	-1.82028	2.87938	18.532	0.00273636	0.0212138	CG32141	saturn	saturn	13.3413	12.6617	12.3528	12.7531	1.06616	1.3644	5.24287	4.72947	Testis
FBgn0052161	-1.91811	0.550943	76.9597	2.38525e-05	0.00024797	CG32161	CG32161		2.23618	2.509	2.3238	2.74369	0.517851	0.353733	0.728176	0.46775	Testis
FBgn0052181	-5.4563	2.33377	321.171	1.10458e-07	1.2812e-05	CG32181	CG32181		11.6736	10.3277	10.2125	11.4829	0.121847	0.126333	0.145635	0.415777	Testis
FBgn0052192	-10.0024	3.12857	351.982	8.72402e-08	1.22158e-05	CG32192	CG32192		15.3122	18.4382	19.3242	24.7949	0	0	0	0.0519722	Testis
FBgn0052219	-8.1202	-0.209413	305.967	1.28471e-05	0.0001505	CG32219	CG32219		1.55396	1.57542	2.07919	1.77832	0	0	0	0	Testis
FBgn0052228	-5.1618	0.047686	103.253	8.35261e-06	0.000107654	CG32228	CG32228		2.23618	1.57542	2.56841	1.87994	0	0.0252667	0.0728176	0.103944	Testis
FBgn0052232	-4.23065	-0.054511	45.7262	0.000157242	0.00140872	CG32232	CG32232		2.19828	1.98386	1.83458	1.42266	0.0304618	0.0505333	0.29127	0	Testis
FBgn0052238	-7.89429	1.79569	237.052	3.67289e-07	1.79742e-05	CG32238	TTLL1B	Tubulin tyrosine ligase-like 1B	8.1488	6.82681	6.72679	8.63755	0	0.0252667	0.0728176	0	Testis
FBgn0052240	-4.30648	1.51523	31.6142	0.000537986	0.00455701	CG32240	CG32240		5.07879	7.2936	6.17642	5.28415	0.0609237	0.0252667	0.145635	0.883527	Testis
FBgn0052252	-3.8809	-0.378806	51.9265	9.90917e-05	0.000901006	CR32252	asRNA:CR32252	antisense RNA:CR32252	1.66766	1.57542	1.0396	1.42266	0.0609237	0.0505333	0.218453	0	Testis
FBgn0052259	-8.04043	2.41897	341.828	8.99353e-08	1.24396e-05	CG32259	CG32259		10.764	10.0943	12.4751	13.8201	0	0.0252667	0.0728176	0.0519722	Testis
FBgn0052305	-8.34236	-0.00504863	237.858	2.36349e-05	0.000246159	CG32305	CG32305		2.50149	1.57542	2.38495	1.6767	0	0	0	0	Testis
FBgn0052313	-3.20974	-0.0144564	42.4878	0.000197894	0.00175353	CG32313	CG32313		2.00877	1.22532	2.07919	2.03237	0.213233	0.1516	0	0.155917	Testis
FBgn0052351	-10.4356	4.28541	622.427	9.2452e-09	6.16818e-06	CG32351	S-Lap2	Sperm-Leucylaminopeptidase 2	48.3243	41.5443	38.7096	46.6936	0.0304618	0	0	0.0519722	Testis
FBgn0052371	-11.0271	2.56342	942.883	8.25753e-07	2.68714e-05	CG32371	CG32371		11.901	12.2532	12.5363	15.7508	0	0	0	0	Testis
FBgn0052392	-2.67327	1.72752	18.1494	0.00290425	0.0224387	CG32392	CG32392		6.32954	7.1769	5.74835	5.94467	0.243695	0.353733	0.364088	2.49466	Testis
FBgn0052396	-2.49875	0.613247	71.2116	3.15773e-05	0.000320635	CG32396	CG32396		3.29742	2.74239	2.26265	2.69288	0.243695	0.252667	0.728176	0.415777	Testis
FBgn0052436	-6.37503	4.03248	526.658	1.68778e-08	7.29356e-06	CG32436	CG32436		30.7759	40.2607	38.8319	35.3632	0.213233	0.202133	0.436905	0.623666	Testis
FBgn0052437	-10.3279	1.87873	1150.19	5.07559e-07	2.13212e-05	CG32437	CG32437		8.83103	8.16883	7.76639	7.62137	0	0	0	0	Testis
FBgn0052440	-7.77116	-0.519608	171.743	5.17853e-05	0.000494818	CG32440	CG32440		1.13704	1.05028	1.71227	1.57508	0	0	0	0	Testis
FBgn0052445	-10.3762	1.92606	885.413	9.63149e-07	2.87211e-05	CG32445	CG32445		9.24794	7.35195	7.88869	8.94241	0	0	0	0	Testis
FBgn0052450	-10.0402	1.59922	511.445	3.6816e-06	6.20457e-05	CG32450	CG32450		7.20127	5.07635	6.48218	7.67218	0	0	0	0	Testis
FBgn0052459	-5.31802	1.83653	36.701	0.00033112	0.00287342	CG32459	CG32459		7.88349	5.54314	7.27717	9.80616	0	0.0252667	0.0728176	0.623666	Testis
FBgn0052461	-7.31805	0.529803	197.56	7.08176e-07	2.44882e-05	CG32461	CG32461		3.22162	2.80074	3.05763	3.04855	0	0	0	0.0519722	Testis
FBgn0052487	-7.87271	-0.429088	361.545	8.56654e-06	0.00010927	CG32487	CG32487		1.36445	1.45872	1.58997	1.47347	0	0	0	0	Testis
FBgn0052488	-8.40779	0.0534698	432.411	5.54233e-06	8.07984e-05	CG32488	CG32488		2.08458	2.15891	1.89573	2.38803	0	0	0	0	Testis
FBgn0052548	-6.03801	2.22367	381.901	5.53718e-08	1.01295e-05	CG32548	CG32548		10.4608	8.86902	10.0902	11.2796	0.0609237	0.1516	0.0728176	0.155917	Testis
FBgn0052568	-10.156	1.71035	758.701	1.4053e-06	3.4879e-05	CG32568	CG32568		6.74645	6.71011	8.37792	6.85923	0	0	0	0	Testis
FBgn0052572	-4.14934	0.725755	69.2877	3.62136e-05	0.000361881	CG32572	CG32572		3.48693	2.80074	3.79147	3.30259	0.0304618	0.252667	0.0728176	0.155917	Testis
FBgn0052582	-1.86125	0.619832	34.7384	0.000379932	0.00327944	CR32582	lncRNA:CR32582	long non-coding RNA:CR32582	2.53939	1.69212	2.3238	3.60745	0.365542	0.404267	0.873811	0.675638	Testis
FBgn0052588	-8.70255	0.32476	477.899	4.34375e-06	6.90012e-05	CG32588	CG32588		2.5773	2.33395	2.75187	2.7945	0	0	0	0	Testis
FBgn0052591	-8.92131	2.08787	243.406	3.34824e-07	1.73405e-05	CG32591	CG32591		8.67942	9.33581	9.11175	10.3143	0	0	0.0728176	0	Testis
FBgn0052650	-5.99573	-0.0225481	147.211	2.16445e-06	4.58007e-05	CG32650	CG32650		2.27408	1.98386	1.28421	2.38803	0.0304618	0.0252667	0	0	Testis
FBgn0052651	-10.2416	1.79428	855.102	1.04884e-06	2.9953e-05	CG32651	CG32651		7.31497	7.4103	7.03256	8.68836	0	0	0	0	Testis
FBgn0052652	-12.4245	3.94681	2164.1	1.07741e-07	1.2812e-05	CR32652	lncRNA:CR32652	long non-coding RNA:CR32652	34.7556	31.9751	33.0224	38.5641	0	0	0	0	Testis
FBgn0052655	-10.6926	2.2353	1088.96	5.80348e-07	2.26871e-05	CG32655	CG32655		11.8631	10.2694	10.7017	8.8916	0	0	0	0	Testis
FBgn0052686	-10.2323	1.78502	566.901	2.86394e-06	5.35137e-05	CG32686	CG32686		7.54238	5.89323	8.68368	8.07865	0	0	0	0	Testis
FBgn0052690	-10.7388	3.85811	461.074	3.08954e-08	9.34652e-06	CR32690	lncRNA:CR32690	long non-coding RNA:CR32690	29.5252	26.8988	36.3858	36.8874	0	0	0	0.0519722	Testis
FBgn0052703	-8.14458	2.52125	397.192	5.01638e-08	9.79429e-06	CG32703	Erk7	Extracellularly regulated kinase 7	13.7203	11.203	12.9032	12.9563	0	0.0252667	0.0728176	0.0519722	Testis
FBgn0052706	-2.52266	0.012311	33.2985	0.000443209	0.00380248	CG32706	CG32706		2.34989	1.05028	1.71227	1.87994	0.0913855	0.1516	0.29127	0.519722	Testis
FBgn0052713	-5.76668	0.807318	117.988	5.15471e-06	7.66248e-05	CG32713	CG32713		4.01755	3.38423	3.30224	4.01392	0.0913855	0.0505333	0	0	Testis
FBgn0052718	-9.18756	0.780411	455.466	4.88366e-06	7.42499e-05	CG32718	CG32718		3.56273	3.15083	3.54686	4.36959	0	0	0	0	Testis
FBgn0052719	-5.42378	1.97175	281.376	1.82123e-07	1.37868e-05	CG32719	CG32719		9.51325	7.0602	8.80598	8.38351	0.0609237	0.176867	0.218453	0.155917	Testis
FBgn0052806	-2.47419	0.594837	20.4173	0.00206654	0.0163336	CG32806	CG32806		3.67644	2.10056	2.2015	2.7945	0.152309	0.101067	0.582541	0.935499	Testis
FBgn0052832	-7.20356	1.09678	265.187	2.27289e-07	1.5028e-05	CG32832	CG32832		4.62397	4.02607	4.09723	5.58901	0.0304618	0.0252667	0	0	Testis
FBgn0052835	-10.2045	1.75913	540.435	3.21833e-06	5.73935e-05	CR32835	lncRNA:CR32835	long non-coding RNA:CR32835	8.98263	5.65983	7.70524	7.31652	0	0	0	0	Testis
FBgn0052846	-9.53982	1.11726	419.421	5.96959e-06	8.49524e-05	CG32846	CG32846		5.23039	3.61763	4.34184	5.48739	0	0	0	0	Testis
FBgn0052847	-2.65337	0.0849012	24.9466	0.00112543	0.00914372	CG32847	CG32847		2.04668	1.75046	1.58997	2.08317	0.0913855	0.126333	0.728176	0.155917	Testis
FBgn0052945	-8.49407	0.135176	241.104	2.28733e-05	0.000239326	CG32945	CG32945		2.691	1.75046	1.83458	2.74369	0	0	0	0	Testis
FBgn0052971	-4.09473	1.10274	28.0672	0.000785258	0.00652961	CG32971	CG32971		4.77558	3.32588	4.28069	5.0301	0.0609237	0	0.364088	0.571694	Testis
FBgn0053017	-4.09363	1.22044	278.882	1.87159e-07	1.37868e-05	CG33017	CG33017		4.81348	4.95965	4.28069	5.0301	0.152309	0.126333	0.29127	0.363805	Testis
FBgn0053060	-5.71494	0.161865	134.351	3.09897e-06	5.64097e-05	CG33060	CG33060		2.08458	2.33395	2.01804	2.69288	0.0609237	0.0252667	0	0	Testis
FBgn0053061	-4.46554	-0.30501	39.7961	0.000253219	0.00221606	CG33061	CG33061		1.74346	1.16698	1.22305	2.03237	0.0304618	0	0	0.207889	Testis
FBgn0053092	-5.08351	2.06673	406.299	4.35219e-08	9.54885e-06	CG33092	P5CDh2	delta-1-Pyrroline-5-carboxylate dehydrogenase 2	9.51325	7.70204	7.76639	10.924	0.213233	0.202133	0.145635	0.207889	Testis
FBgn0053125	-6.9561	0.914897	157.012	1.75746e-06	4.0067e-05	CG33125	CG33125		4.20706	3.90937	4.6476	3.30259	0	0	0.0728176	0.0519722	Testis
FBgn0053136	-5.23429	0.967165	91.0945	1.36241e-05	0.000157517	CG33136	CG33136		4.32076	3.67597	2.99648	5.33496	0	0.101067	0.145635	0.103944	Testis
FBgn0053189	-0.970896	2.21792	16.0636	0.0039954	0.0302653	CG33189	CG33189		5.87472	7.76039	5.62605	8.02784	1.85817	2.07187	4.36905	2.96241	Testis
FBgn0053218	-3.63877	0.914633	44.6083	0.000172553	0.00153739	CR33218	lncRNA:CR33218	long non-coding RNA:CR33218	3.79014	3.38423	3.54686	4.16635	0.0609237	0.0758	0.582541	0.415777	Testis
FBgn0053223	-4.54006	0.143262	76.2232	2.54531e-05	0.000262684	CG33223	CG33223		2.16038	1.63377	2.3238	2.64208	0.0304618	0.0505333	0	0.207889	Testis
FBgn0053233	-8.34344	-0.00279775	213.359	3.07252e-05	0.000313105	CG33233	CG33233		2.7289	1.98386	2.07919	1.37185	0	0	0	0	Testis
FBgn0053252	-6.26824	1.03587	257.974	2.52776e-07	1.53602e-05	CG33252	CG33252		4.51027	4.14276	4.70876	4.11554	0.0304618	0.0252667	0	0.103944	Testis
FBgn0053278	-5.04444	0.807372	108.7	6.94656e-06	9.43568e-05	CG33278	CG33278		3.48693	3.79267	3.17994	4.06473	0.0304618	0.0252667	0.0728176	0.259861	Testis
FBgn0053284	-9.79856	1.3664	461.681	4.72505e-06	7.31126e-05	CG33284	CG33284		6.55694	4.6679	4.6476	6.50357	0	0	0	0	Testis
FBgn0053287	-10.7245	2.26661	1172.75	4.83975e-07	2.08044e-05	CG33287	CG33287		11.901	11.6698	9.78443	9.34888	0	0	0	0	Testis
FBgn0053293	-1.93674	3.17457	44.4235	0.000174037	0.00154939	CG33293	CG33293		14.0993	15.229	14.9824	19.5615	1.52309	2.67827	4.29624	5.24919	Testis
FBgn0053309	-7.52261	1.43606	141.936	2.64807e-06	5.09058e-05	CG33309	CG33309		6.55694	6.00993	5.44259	5.48739	0	0	0	0.103944	Testis
FBgn0053318	-5.41015	1.49128	73.5563	3.01829e-05	0.000308132	CR33318	CR33318		6.10213	5.018	5.32028	7.51975	0	0.202133	0.0728176	0.103944	Testis
FBgn0053319	-3.98573	1.04736	28.3315	0.000762445	0.00635857	CR33319	CR33319		4.16916	3.79267	3.73031	4.92849	0.0304618	0.126333	0.800993	0.0519722	Testis
FBgn0053322	-9.62222	1.19738	443.543	5.20964e-06	7.72075e-05	CG33322	CG33322		6.29163	4.9013	3.73031	4.92849	0	0	0	0	Testis
FBgn0053340	-12.2243	3.74825	1313.44	3.71202e-07	1.79922e-05	CG33340	CG33340		37.9014	27.2489	26.1733	29.3677	0	0	0	0	Testis
FBgn0053489	-7.17873	1.1129	182.447	9.93611e-07	2.91957e-05	CG33489	CG33489		4.54817	3.90937	4.83106	5.23334	0.0304618	0	0.0728176	0	Testis
FBgn0053490	-6.954	0.214264	136.538	2.95466e-06	5.46684e-05	CG33490	CG33490		2.88051	2.15891	2.26265	2.2356	0	0	0.0728176	0	Testis
FBgn0054012	-5.49672	0.000820753	92.9772	1.23483e-05	0.000146654	CG34012	CG34012		1.85717	1.98386	2.38495	1.82913	0.0609237	0	0.0728176	0	Testis
FBgn0054021	-6.4354	-0.288948	140.936	2.53775e-06	4.94556e-05	CG34021	CG34021		1.70556	1.22532	1.83458	1.72751	0.0304618	0	0	0	Testis
FBgn0054027	-2.78626	0.174965	26.8588	0.000900241	0.00740968	CG34027	CG34027		2.50149	1.57542	1.77343	2.33722	0.152309	0.252667	0	0.46775	Testis
FBgn0054029	-8.44896	0.0920482	166.699	5.80613e-05	0.000546953	CG34029	CG34029		2.12248	1.63377	1.77343	3.20098	0	0	0	0	Testis
FBgn0058064	-8.56546	0.200838	196.93	3.81669e-05	0.0003788	CG40064	ARY	Aldehyde reductase Y	2.691	2.56735	1.40651	2.84531	0	0	0	0	Testis
FBgn0061196	-5.86646	0.665977	183.279	9.42823e-07	2.84402e-05	CG15468	CG15468		3.07001	3.03414	3.24109	3.9123	0.0609237	0.0252667	0.0728176	0	Testis
FBgn0061197	-11.5228	4.62627	740.883	4.5533e-09	6.16818e-06	CG13164	salto	salto	58.3682	56.3066	53.264	54.4674	0.0304618	0	0	0	Testis
FBgn0061435	-8.63492	0.261322	241.979	2.26739e-05	0.000237458	CG30270	CG30270		2.27408	1.80881	2.87418	2.99774	0	0	0	0	Testis
FBgn0062517	-3.8551	1.44683	526.607	1.5833e-08	7.29356e-06	CG16984	CG16984		6.10213	5.30974	5.25913	5.58901	0.243695	0.252667	0.29127	0.415777	Testis
FBgn0063261	-7.0378	1.42732	112.466	6.45735e-06	8.99745e-05	CG31275	CG31275		5.3062	4.9013	3.66916	9.29807	0	0.0252667	0	0.103944	Testis
FBgn0064912	-4.98132	2.48305	124.006	4.50158e-06	7.06445e-05	CG31178	CG31178		12.2422	10.6778	11.3744	13.8201	0.213233	0.4548	0.29127	0.103944	Testis
FBgn0065110	-1.25143	0.504933	19.7503	0.00221182	0.017397	CG34042	ppk10	pickpocket 10	2.00877	2.2756	1.83458	2.33722	0.639699	0.328467	0.728176	1.24733	Testis
FBgn0067861	-5.74424	0.204774	82.1736	1.95982e-05	0.000210692	CG9580	Sdic1	Sperm-specific dynein intermediate chain 1	2.08458	1.34202	3.11879	2.84531	0.0609237	0	0	0.0519722	Testis
FBgn0069354	-4.25734	2.62145	78.2245	2.4211e-05	0.000251236	CG17137	Porin2	Porin2	13.9856	11.9032	12.4751	13.6677	0.396004	0.252667	0.218453	1.40325	Testis
FBgn0069913	-4.74498	0.866657	125.506	4.05134e-06	6.62108e-05	CG4681	CG4681		4.24496	3.67597	3.11879	4.06473	0.0913855	0.126333	0	0.155917	Testis
FBgn0069938	-5.17733	-0.308249	158.705	1.61963e-06	3.82706e-05	CG41106	CG41106		1.17494	1.80881	2.01804	1.37185	0.0304618	0.0252667	0	0.0519722	Testis
FBgn0083946	-6.71035	0.672247	157.615	1.72276e-06	3.98765e-05	CG34110	lobo	lost boys	4.24496	3.15083	3.11879	2.89612	0.0304618	0	0.0728176	0	Testis
FBgn0085190	-6.96913	0.227322	121.571	4.585e-06	7.15311e-05	CG34161	CG34161		2.53939	1.80881	2.26265	2.99774	0	0	0.0728176	0	Testis
FBgn0085197	-11.7533	3.28096	857.505	1.11769e-06	3.08298e-05	CG34168	CG34168		23.1578	17.738	19.1408	26.7256	0	0	0	0	Testis
FBgn0085217	-9.04394	0.646389	310.003	1.24452e-05	0.000147342	CG34188	CG34188		3.60063	3.26753	2.3238	4.06473	0	0	0	0	Testis
FBgn0085303	-8.80213	0.419807	308.163	1.26263e-05	0.000148555	CG34274	CG34274		3.60063	2.2756	2.99648	2.33722	0	0	0	0	Testis
FBgn0085321	-5.95344	-0.0638475	201.686	6.50315e-07	2.35976e-05	CG34292	CG34292		1.85717	1.92551	1.95689	1.98156	0.0304618	0.0252667	0	0	Testis
FBgn0086681	-2.45853	0.875083	155.385	1.75467e-06	4.0067e-05	CG31801	Mst36Fa	Male-specific transcript 36Fa	3.44903	3.55928	2.81302	3.50583	0.33508	0.379	0.509723	0.72761	Testis
FBgn0086907	-9.32696	2.46418	338.185	9.46503e-08	1.26988e-05	CG13263	Cyt-c-d	Cytochrome c distal	13.2655	10.5028	12.0471	13.0579	0	0	0	0.0519722	Testis
FBgn0086915	-7.86419	4.28414	186.718	9.74463e-07	2.87822e-05	CG3354	Mst77F	Male-specific transcript 77F	48.1727	40.144	39.5046	46.6936	0.274157	0.126333	0	0.0519722	Testis
FBgn0086916	-7.86795	1.03553	222.52	4.58129e-07	2.0533e-05	CG11281	snky	sneaky	4.51027	3.85102	3.66916	5.5382	0.0304618	0	0	0	Testis
FBgn0250821	-3.87464	0.557841	103.633	8.1288e-06	0.000105609	CG14644	CG14644		3.29742	1.75046	2.99648	3.55664	0.121847	0.0758	0.145635	0.311833	Testis
FBgn0250834	-9.82854	1.39383	604.597	2.44744e-06	4.86144e-05	CG33308	CG33308		5.72311	4.7846	5.87066	6.45276	0	0	0	0	Testis
FBgn0250844	-8.48993	2.37595	299.482	1.51149e-07	1.31872e-05	CG4218	CG4218		12.8107	11.1446	10.3348	11.6353	0	0.0252667	0.0728176	0	Testis
FBgn0250845	-10.8527	2.39242	924.9	8.65606e-07	2.7401e-05	CG1288	CG1288		11.8631	10.9696	9.96789	13.7185	0	0	0	0	Testis
FBgn0250846	-7.11625	1.03557	162.783	1.53367e-06	3.70104e-05	CG15180	glob2	globin 2	5.64731	2.85909	3.73031	5.23334	0.0304618	0	0	0.0519722	Testis
FBgn0250904	-8.75759	3.48037	377.681	6.65655e-08	1.07855e-05	CG34434	CG34434		27.8196	19.4885	24.4611	27.7926	0.0609237	0	0.0728176	0.0519722	Testis
FBgn0259184	-6.59833	-0.130412	156.764	1.69694e-06	3.95209e-05	CG42288	CG42288		1.93297	1.86716	1.83458	1.72751	0	0	0	0.0519722	Testis
FBgn0259195	-4.81669	0.219043	192.453	7.7783e-07	2.62328e-05	CG42299	CG42299		2.99421	1.69212	2.01804	2.59127	0.0609237	0.0252667	0.0728176	0.103944	Testis
FBgn0259196	-5.52408	0.0400901	145.254	2.26476e-06	4.67561e-05	CG42300	CG42300		2.23618	1.63377	2.14034	2.2356	0.0304618	0	0.0728176	0.0519722	Testis
FBgn0259701	-8.56012	0.194174	349.818	9.2812e-06	0.000114795	CG42355	CG42355		2.691	1.86716	2.56841	2.33722	0	0	0	0	Testis
FBgn0259729	-8.85142	0.464493	262.795	1.85717e-05	0.000201763	CG42383	CG42383		2.7289	2.97579	2.07919	3.81069	0	0	0	0	Testis
FBgn0259742	-0.663952	4.08559	41.909	0.000202328	0.00179002	CG42360	CG42360		25.6214	22.1142	24.5222	21.3398	11.3927	8.76753	12.6703	14.0325	Testis
FBgn0259791	-1.14115	1.62371	27.6941	0.000788226	0.0065447	CG6897	bora	aurora borealis	4.35866	4.08442	4.76991	5.33496	1.09663	1.23807	2.40298	2.13086	Testis
FBgn0259794	-5.8556	2.10827	261.552	2.49139e-07	1.53602e-05	CG13030	sinah	sina homologue	10.5745	7.76039	7.64408	11.3812	0.152309	0.0505333	0.218453	0.103944	Testis
FBgn0259795	-10.7228	5.0616	417.063	4.54627e-08	9.54885e-06	CG4750	loopin-1	loopin-1	87.4386	69.26	66.901	77.3315	0.0304618	0	0	0.103944	Testis
FBgn0259922	-8.80919	0.424372	280.198	1.59011e-05	0.00017786	CG42448	Skadu	Skadu	2.95631	1.98386	3.30224	2.99774	0	0	0	0	Testis
FBgn0260007	-3.73145	-0.662504	66.3472	4.08627e-05	0.000403715	CG42493	CG42493		1.13704	1.22532	1.10075	1.06699	0.0304618	0.0252667	0.218453	0.0519722	Testis
FBgn0260428	-10.7755	2.31678	966.754	7.76729e-07	2.62328e-05	CG42523	CG42523		12.0147	9.62755	10.1513	12.2958	0	0	0	0	Testis
FBgn0260461	-5.28918	2.25181	401.775	4.54596e-08	9.54885e-06	CG14098	Rcd7	Reduction in Cnn dots 7	12.3559	8.69397	9.47866	10.5683	0.121847	0.1516	0.218453	0.363805	Testis
FBgn0260480	-0.881979	1.6593	21.3694	0.00175134	0.013959	CG32295	CG32295		4.43447	4.49286	4.5253	4.52201	2.04094	1.08647	2.18453	2.54664	Testis
FBgn0260481	-1.04075	0.222766	24.8824	0.00110197	0.00897243	CG32454	CG32454		1.97087	1.86716	1.34536	1.37185	0.548313	0.429533	0.655358	0.935499	Testis
FBgn0260643	-8.12929	-0.198462	324.057	1.11758e-05	0.000134846	CG42535	CG42535		1.85717	1.45872	1.71227	1.98156	0	0	0	0	Testis
FBgn0260776	-5.38861	1.67653	35.026	0.000385955	0.0033289	CG42570	CG42570		6.67065	7.0602	6.54334	7.11328	0.0304618	0	0	0.571694	Testis
FBgn0260933	-0.822158	1.91989	30.86	0.000557664	0.00471665	CG11838	rempA	reduced mechanoreceptor potential A	4.66187	6.12662	5.38144	5.18253	2.25418	2.02133	2.69425	2.49466	Testis
FBgn0261112	-0.623494	4.1966	17.4204	0.00317779	0.024502	CG7828	APP-BP1	beta-Amyloid precursor protein binding protein 1	25.356	23.5729	25.1949	25.811	13.4337	12.0269	10.9955	13.8246	Testis
FBgn0261287	-6.07098	2.25288	146.971	2.39294e-06	4.83639e-05	CG12250	ymp	yellow-emperor	10.8777	8.69397	9.78443	12.1942	0.0609237	0.126333	0	0.259861	Testis
FBgn0261395	-5.96559	-0.0201465	84.0281	1.79643e-05	0.000196292	CG1736	Prosalpha3T	Proteasome alpha3 subunit, Testis-specific	2.12248	1.75046	1.77343	2.28641	0	0	0	0.103944	Testis
FBgn0261529	-4.99243	1.96791	85.2523	1.77559e-05	0.000194389	CG15287	ms(2)34Fe	male sterile (2) 34Fe	9.85437	8.05213	8.68368	6.91004	0.182771	0.0505333	0.0728176	0.571694	Testis
FBgn0261571	-4.44379	0.853919	122.625	4.3813e-06	6.94033e-05	CG42685	CG42685		3.94175	3.55928	3.54686	3.75988	0.0609237	0.176867	0.218453	0.0519722	Testis
FBgn0261686	-6.66447	0.608123	161.662	1.55948e-06	3.73647e-05	CG42733	CG42733		3.37323	2.33395	2.93533	4.11554	0.0304618	0	0	0.0519722	Testis
FBgn0261816	-7.46099	0.645313	183.845	9.52463e-07	2.85789e-05	CG42758	CG42758		3.75224	2.509	2.69072	4.21716	0	0.0252667	0	0	Testis
FBgn0261992	-3.89046	0.323792	68.5412	3.7243e-05	0.000370861	CG42810	CG42810		2.38779	2.21725	2.2015	2.94693	0.0609237	0.101067	0.364088	0.0519722	Testis
FBgn0262097	-8.95798	2.10307	286.653	1.77211e-07	1.37868e-05	CR42850	lncRNA:CR42850	long non-coding RNA:CR42850	10.8777	7.81874	10.2736	8.8916	0	0	0	0.0519722	Testis
FBgn0262102	-9.37202	0.956939	490.36	4.0796e-06	6.65767e-05	CG42855	CG42855		4.92718	3.38423	4.21953	4.11554	0	0	0	0	Testis
FBgn0262104	-6.41587	0.430931	68.3737	3.91557e-05	0.000388202	CG42857	CG42857		2.91841	1.92551	2.50726	3.75988	0	0	0.145635	0	Testis
FBgn0262123	-1.48373	2.91841	19.7152	0.0022889	0.017941	CG41265	l(2)41Ab	lethal (2) 41Ab	11.9768	11.6114	13.0255	13.0071	1.79725	1.76867	5.09723	6.39258	Testis
FBgn0262352	-4.58091	0.475511	194.5	7.47025e-07	2.54773e-05	CG43050	CG43050		2.6531	2.56735	2.3238	3.70907	0.0913855	0.101067	0.0728176	0.0519722	Testis
FBgn0262354	-8.74125	0.362679	187.422	4.39053e-05	0.000429288	CG43052	CG43052		2.7289	2.15891	1.95689	3.86149	0	0	0	0	Testis
FBgn0262360	-8.02487	-0.291295	368.768	8.16437e-06	0.00010595	CG43058	CG43058		1.89507	1.69212	1.52882	1.42266	0	0	0	0	Testis
FBgn0262485	-8.77806	0.396342	414.088	6.15845e-06	8.69853e-05	CG43075	CG43075		2.95631	2.33395	2.56841	3.15017	0	0	0	0	Testis
FBgn0262487	-6.36104	1.64319	100.116	9.89642e-06	0.000121215	CG43077	CG43077		6.48114	6.36002	7.39947	6.80842	0	0.0505333	0	0.207889	Testis
FBgn0262535	-8.3571	0.00782826	363.514	8.45424e-06	0.000108226	CG43089	CG43089		2.08458	2.15891	1.65112	2.33722	0	0	0	0	Testis
FBgn0262544	-8.6418	0.267102	421.616	5.89419e-06	8.4409e-05	CG43098	CG43098		2.27408	2.3923	2.93533	2.43884	0	0	0	0	Testis
FBgn0262546	-8.20964	-0.126071	409.982	6.30964e-06	8.85593e-05	CR43100	CR43100		1.93297	1.80881	1.65112	2.03237	0	0	0	0	Testis
FBgn0262566	-8.12938	-0.198605	223.275	2.75361e-05	0.000282637	CG43106	CG43106		1.93297	1.22532	2.01804	1.82913	0	0	0	0	Testis
FBgn0262568	-5.86182	-0.125362	116.932	5.21543e-06	7.72075e-05	CG43108	CG43108		1.97087	1.28367	1.65112	2.38803	0.0304618	0	0	0.0519722	Testis
FBgn0262575	-8.02915	-0.289316	207.739	3.27674e-05	0.000330353	CG43115	CG43115		1.47816	1.34202	1.52882	2.18479	0	0	0	0	Testis
FBgn0262581	-6.97357	1.33451	202.041	6.73621e-07	2.40708e-05	CG43121	CG43121		6.67065	5.07635	4.34184	5.69062	0.0304618	0.0505333	0	0	Testis
FBgn0262598	-4.17084	1.76421	124.243	4.2282e-06	6.81779e-05	CG7795	mtsh	mitoshell	8.073	5.83488	6.9714	7.41813	0.304618	0.3032	0.0728176	0.46775	Testis
FBgn0262606	-8.39902	0.0482166	103.08	0.000188649	0.00167553	CR43132	lncRNA:CR43132	long non-coding RNA:CR43132	2.38779	1.16698	1.65112	3.20098	0	0	0	0	Testis
FBgn0262991	-6.82687	0.0588638	169.413	1.26528e-06	3.29104e-05	CR43299	asRNA:CR43299	antisense RNA:CR43299	2.50149	1.63377	1.95689	2.38803	0	0.0252667	0	0	Testis
FBgn0263022	-6.62783	-0.0787346	97.6858	1.03012e-05	0.000125226	CG43317	CG43317		2.7668	1.69212	1.34536	1.77832	0	0	0.0728176	0	Testis
FBgn0263023	-7.35964	1.2659	189.093	8.69528e-07	2.7401e-05	CG43318	CG43318		5.19249	3.96772	4.40299	7.11328	0.0304618	0	0	0.0519722	Testis
FBgn0263048	-1.81101	3.98292	258.029	2.52568e-07	1.53602e-05	CG43343	Gpdh3	Glycerol-3-phosphate dehydrogenase 3	28.5398	29.6412	25.6841	26.8272	5.39175	4.82593	6.11668	8.88724	Testis
FBgn0263113	-2.8592	1.21114	68.4812	3.71909e-05	0.000370861	CG43370	Cc2d2a	Coiled-coil and C2 domain containing 2A	3.48693	4.60955	4.95337	4.67444	0.456928	0.6064	0.218453	0.46775	Testis
FBgn0263774	-8.16273	-0.165187	176.235	4.90278e-05	0.000472049	CG43691	CG43691		2.23618	1.75046	1.10075	2.08317	0	0	0	0	Testis
FBgn0263988	-3.24776	1.40003	233.9	3.68493e-07	1.79742e-05	CG7051	Dic61B	Dynein intermediate chain at 61B	4.96508	5.36809	5.56489	4.92849	0.274157	0.328467	0.509723	0.675638	Testis
FBgn0264077	-5.31859	-0.161935	175.111	1.11481e-06	3.08298e-05	CG9906	Cnx14D	Calnexin 14D	1.62976	1.80881	1.71227	1.93075	0.0304618	0.0252667	0.0728176	0	Testis
FBgn0264086	-8.98178	2.12689	273.988	2.12538e-07	1.44348e-05	CG43755	CG43755		11.5599	7.64369	8.80598	10.4667	0	0	0	0.0519722	Testis
FBgn0264307	-1.67342	5.10603	154.606	1.78836e-06	4.04056e-05	CG43782	orb2	orb2	52.6451	57.3569	60.0519	65.8486	11.3318	12.1533	18.35	17.2028	Testis
FBgn0264344	-2.75669	2.44831	222.881	4.43499e-07	2.02724e-05	CG43800	CG43800		10.9535	8.34388	11.9248	10.924	1.00524	1.18753	1.38353	1.2993	Testis
FBgn0264347	-11.5472	3.07671	2097.46	1.16336e-07	1.2812e-05	CR43803	lncRNA:CR43803	long non-coding RNA:CR43803	18.1169	18.5549	18.835	19.8156	0	0	0	0	Testis
FBgn0264739	-7.66184	-0.612108	194.976	3.81739e-05	0.0003788	CG43997	CG43997		1.17494	1.10863	1.10075	1.6767	0	0	0	0	Testis
FBgn0265089	-7.4262	3.15446	141.957	2.72385e-06	5.18156e-05	CG8023	eIF4E3	eukaryotic translation initiation factor 4E3	21.528	15.054	17.612	24.7949	0.121847	0.126333	0	0	Testis
FBgn0265102	-0.644747	3.11147	15.5498	0.00436493	0.0328732	CG7161	Oseg1	Outer segment 1	12.0526	12.72	11.4967	10.924	4.56928	3.84053	7.13612	9.09513	Testis
FBgn0265265	-8.03237	-0.284754	159.128	6.34339e-05	0.000591877	CG32727	CG32727		1.62976	1.28367	1.28421	2.33722	0	0	0	0	Testis
FBgn0265269	-9.75995	1.32965	313.333	1.25291e-05	0.000147566	CG15425	CG15425		6.67065	3.96772	4.46415	6.656	0	0	0	0	Testis
FBgn0265271	-5.82519	0.301284	107.082	7.34268e-06	9.78592e-05	CG14717	CG14717		2.95631	2.2756	2.3238	2.54046	0.0609237	0	0.0728176	0	Testis
FBgn0265272	-1.20508	-0.0235149	16.6922	0.00358479	0.027398	CG30060	CG30060		1.02334	1.22532	1.65112	1.72751	0.365542	0.328467	0.800993	0.519722	Testis
FBgn0265342	-3.03529	1.25912	144.257	2.3237e-06	4.7365e-05	CG44296	CG44296		4.51027	4.55121	5.01452	4.4712	0.33508	0.3032	0.364088	0.831555	Testis
FBgn0265576	-1.05213	0.801137	16.2786	0.0038453	0.0292119	CG44403	CG44403		2.38779	2.45065	2.99648	2.2356	0.609237	0.758	1.60199	0.987471	Testis
FBgn0265606	-8.37595	0.0256026	208.491	3.24834e-05	0.000328073	CG17268	Prosalpha4T1	Proteasome alpha4 subunit, Testis-specific 1	2.16038	1.57542	1.77343	2.7945	0	0	0	0	Testis
FBgn0266000	-0.635406	6.32465	16.8208	0.00350834	0.0268681	CG44774	CG44774		115.637	119.207	106.039	99.9924	39.6918	40.7551	72.8176	76.2951	Testis
FBgn0266282	-0.646302	4.12214	32.14	0.00048885	0.00417196	CG5524	jnj	java no jive	25.2423	22.3476	24.033	23.8803	11.941	9.9298	10.9955	15.2798	Testis
FBgn0266432	-5.26389	0.397021	61.8804	5.57116e-05	0.000527447	CG45062	CG45062		3.25952	2.85909	2.01804	2.64208	0	0.0252667	0	0.207889	Testis
FBgn0266436	-5.75736	1.11076	98.0057	1.04579e-05	0.000126859	CG45066	CG45066		4.77558	4.9013	4.34184	4.31878	0.0304618	0	0.0728176	0.207889	Testis
FBgn0266709	-4.21188	2.26422	181.735	1.00503e-06	2.9455e-05	CG11253	Zmynd10	Zinc finger MYND-type containing 10	11.7873	9.21911	8.19446	11.2288	0.456928	0.480066	0.218453	0.415777	Testis
FBgn0266710	-2.42369	1.52458	59.723	6.01751e-05	0.000564989	CG32595	hog	hog	5.83682	4.08442	4.5253	6.656	0.578775	0.379	1.16508	1.19536	Testis
FBgn0267253	-0.802286	1.46833	18.4624	0.00269112	0.0208774	CG32700	CG32700		3.79014	3.15083	3.60801	4.77606	1.46217	1.3644	2.18453	2.02691	Testis
FBgn0267326	-4.35556	1.55256	211.397	5.43197e-07	2.21617e-05	CG7075	Ntl	Neurotransmitter transporter-like	8.1867	5.018	5.74835	5.5382	0.243695	0.252667	0.145635	0.207889	Testis
FBgn0267363	-4.18624	1.98471	174.99	1.14477e-06	3.11367e-05	CG45760	JYalpha	JYalpha	8.75523	8.34388	7.58293	8.43432	0.365542	0.1516	0.29127	0.675638	Testis
FBgn0267366	-11.9791	3.50454	1764.15	1.77868e-07	1.37868e-05	CG5017	mil	milkah	25.4318	22.4059	25.9899	27.691	0	0	0	0	Testis
FBgn0267383	-9.74646	1.31516	766.305	1.37145e-06	3.42621e-05	CG9602	Ubc87F	Ubiquitin conjugating enzyme 87F	5.76101	4.95965	5.13682	5.74143	0	0	0	0	Testis
FBgn0267430	-4.94536	0.495058	77.1684	2.46575e-05	0.000255169	CG45783	Pzl	Piezo-like	2.38779	2.97579	3.3634	2.84531	0.152309	0.0252667	0.0728176	0	Testis
FBgn0267432	-10.0843	1.64011	510.384	3.70028e-06	6.2138e-05	CG45785	kl-3	male fertility factor kl3	5.382	6.41837	7.58293	7.87542	0	0	0	0	Testis
FBgn0267433	-9.97867	1.53983	741.482	1.48644e-06	3.6101e-05	CG45786	kl-5	male fertility factor kl5	6.97386	6.53506	5.19798	6.70681	0	0	0	0	Testis
FBgn0267689	-7.74376	2.11061	205.372	6.55301e-07	2.36701e-05	CG46025	CG46025		11.0293	8.05213	8.56137	10.3143	0	0.0252667	0	0.103944	Testis
FBgn0267726	-8.55523	2.90605	257.694	2.87337e-07	1.62138e-05	CG46059	CG46059		17.1693	15.2874	14.4932	19.6631	0	0.0505333	0.0728176	0	Testis
FBgn0267727	-0.638879	6.91674	25.4137	0.00103207	0.0084214	CG4799	Pen	Pendulin	183.026	157.25	160.342	164.012	68.7524	62.6108	102.818	108.414	Testis
FBgn0030852	-3.88632	1.05836	298.633	1.4368e-07	1.31872e-05	CG8316	corolla	corolla	4.20706	3.38423	5.01452	4.21716	0.213233	0.1516	0.218453	0.311833	Testis
FBgn0038762	-7.97506	5.84127	86.2807	1.7002e-05	0.000187875	CG4836	CG4836		137.014	125.158	121.266	132.002	1.0357	0.1516	0.0728176	0.103944	Testis
FBgn0013809	-6.89876	1.63862	278.171	1.93273e-07	1.37868e-05	CG7092	Dhc16F	Dynein heavy chain at 16F	5.87472	6.88516	7.39947	6.91004	0.0304618	0.0505333	0.0728176	0	Testis
FBgn0051600	-8.75134	0.370148	178.874	4.93153e-05	0.000474012	CG31600	CG31600		2.19828	2.56735	2.01804	4.01392	0	0	0	0	Testis
FBgn0085293	-4.04858	0.24612	23.8162	0.00130474	0.0105402	CG34264	ddbt	deadbeat	2.46359	2.74239	2.01804	2.08317	0	0	0.145635	0.415777	Testis
FBgn0034133	-8.44546	2.30492	209.812	6.24629e-07	2.3275e-05	CG7813	knon	knotted onions	12.4317	9.8026	10.5183	10.924	0.0609237	0	0	0	Testis
FBgn0035707	-0.940136	4.8267	86.2688	1.57356e-05	0.000176357	CG8368	Rexo5	RNA exonuclease 5	48.3622	41.3109	39.6881	38.9198	14.5912	15.3116	18.8598	20.4251	Testis
FBgn0039177	-4.13137	-0.0502998	68.5537	3.72187e-05	0.000370861	CG13611	shps	sheepish	1.78137	1.75046	2.14034	1.82913	0.0913855	0.0252667	0	0.207889	Testis
FBgn0038052	-6.6799	3.94552	910.655	1.85288e-09	6.16818e-06	CG5538	vrs	versager	37.5603	31.5083	30.9433	36.9891	0.152309	0.277933	0.29127	0.311833	Testis
FBgn0016080	-1.95752	1.95654	131.708	3.27334e-06	5.78291e-05	CG46386	xmas	xmas	6.63275	6.76846	5.6872	8.12946	1.30986	1.23807	1.45635	1.45522	Testis
FBgn0038252	-5.5787	1.10163	651.602	6.88337e-09	6.16818e-06	CG3509	BigH1	Histone H1 variant BigH1	5.19249	3.90937	4.5253	4.52201	0.0609237	0.0505333	0.0728176	0.103944
FBgn0019660	-8.64792	6.43617	524.09	1.73626e-08	7.29356e-06	CR32665	lncRNA:roX2	long non-coding RNA on the X	236.391	138.52	164.745	238.752	0.243695	0.4548	0.29127	0.46775	dosage compensation complex
FBgn0052657	-8.78984	2.63697	352.612	8.05623e-08	1.15663e-05	CR32657	lncRNA:CR32657	long non-coding RNA:CR32657	12.5833	11.0863	12.7198	18.647	0.0304618	0.0252667	0	0	dosage compensation complex
FBgn0037759	-6.46283	1.95805	318.917	1.12559e-07	1.2812e-05	CG8526	CG8526		9.02054	6.36002	9.29521	9.09484	0.0304618	0.0758	0.145635	0.0519722
FBgn0040859	-9.51686	3.85661	328.292	1.13949e-07	1.2812e-05	CR32658	lncRNA:CR32658	long non-coding RNA:CR32658	29.4115	28.4159	32.3498	39.3263	0	0.0505333	0.0728176	0
FBgn0263647	-8.58473	1.72514	311.11	1.26316e-07	1.30243e-05	CG43638	CG43638		7.65609	6.65176	6.54334	8.07865	0.0304618	0	0	0
FBgn0259739	-9.90837	3.05433	307.486	1.46402e-07	1.31872e-05	CG42393	CG42393		16.6008	16.2793	18.7739	22.2544	0	0	0.0728176	0
FBgn0085337	-3.75087	0.326103	297.174	1.46428e-07	1.31872e-05	CG34308	CG34308		2.50149	2.509	2.44611	2.33722	0.0913855	0.1516	0.145635	0.155917
FBgn0262002	-11.2766	2.80973	1742.53	1.83332e-07	1.37868e-05	CG42820	CG42820		16.7524	14.9956	14.3709	16.3605	0	0	0	0
FBgn0261835	-6.12266	3.33246	286.104	1.91479e-07	1.37868e-05	CR42767	lncRNA:CR42767	long non-coding RNA:CR42767	21.2248	20.7722	22.3207	24.5408	0.213233	0.328467	0.0728176	0.259861
FBgn0032364	-7.76005	0.925412	275.656	1.95756e-07	1.37905e-05	CG4970	CG4970		3.97965	4.49286	3.85262	3.96311	0	0.0252667	0	0
FBgn0261522	-6.92827	1.67337	254.422	2.75733e-07	1.59559e-05	CR42657	lncRNA:CR42657	long non-coding RNA:CR42657	6.67065	5.83488	7.46063	7.72299	0.0609237	0.0252667	0.0728176	0
FBgn0262682	-7.95116	1.11332	235.298	3.69246e-07	1.79742e-05	CR43152	asRNA:CR43152	antisense RNA:CR43152	4.39656	3.79267	5.44259	4.9793	0.0304618	0	0	0
FBgn0266757	-7.13162	1.04701	232.875	3.7922e-07	1.82251e-05	CG5747	mfr	misfire	4.01755	4.37616	4.28069	5.0301	0.0304618	0	0	0.0519722
FBgn0052720	-7.52381	0.701471	230.623	3.89159e-07	1.86238e-05	CG32720	CG32720		3.44903	3.15083	4.15838	3.04855	0	0.0252667	0	0
FBgn0250827	-7.78379	0.954819	227.249	4.20288e-07	1.9698e-05	CG34218	whip	whipple	4.28286	3.26753	4.34184	4.67444	0.0304618	0	0	0
FBgn0262100	-10.9156	2.45383	1179.6	4.77119e-07	2.07336e-05	CG42853	CG42853		11.6736	11.1446	12.2305	13.5152	0	0	0	0
FBgn0085454	-6.13535	0.913853	205.267	6.11825e-07	2.32329e-05	CG34425	CG34425		4.96508	3.50093	3.97492	3.50583	0.0304618	0.0505333	0.0728176	0
FBgn0250824	-2.51614	0.809112	202.75	6.37353e-07	2.34653e-05	CG33655	CG33655		3.33532	2.91744	3.42455	3.09936	0.33508	0.404267	0.436905	0.571694
FBgn0083960	-4.01718	1.17262	202.419	6.41347e-07	2.34653e-05	CG34124	CG34124		4.54817	4.37616	5.01452	4.4712	0.213233	0.126333	0.145635	0.415777
FBgn0036075	-10.3086	1.85979	941.65	8.28402e-07	2.68714e-05	CG8065	CG8065		8.30041	7.1769	7.82754	8.58674	0	0	0	0
FBgn0262787	-7.64663	0.840971	190.479	8.37277e-07	2.68714e-05	CG43168	CG43168		4.77558	3.32588	3.11879	4.01392	0	0	0	0.0519722
FBgn0250822	-6.61573	0.5639	183.961	9.38117e-07	2.84402e-05	CG34222	CG34222		3.71434	2.97579	2.38495	3.30259	0.0304618	0	0	0.0519722
FBgn0051609	-6.88128	0.106895	183.008	9.42422e-07	2.84402e-05	CG31609	CG31609		2.27408	1.80881	2.14034	2.59127	0	0.0252667	0	0
FBgn0265508	-12.0443	3.56926	914.153	9.67331e-07	2.87211e-05	CR44370	asRNA:CR44370	antisense RNA:CR44370	24.3706	23.0478	24.7668	33.8897	0	0	0	0
FBgn0053286	-8.47419	2.36021	181.539	1.08345e-06	3.03419e-05	CG33286	CG33286		13.0381	12.1949	10.5794	9.70455	0	0	0	0.103944
FBgn0264567	-5.57686	1.37838	177.414	1.1011e-06	3.06095e-05	CR43939	lncRNA:CR43939	long non-coding RNA:CR43939	4.81348	4.9013	6.17642	6.30033	0.0913855	0.101067	0	0.103944
FBgn0265263	-11.0914	2.62665	808.17	1.20416e-06	3.22112e-05	CG42688	CG42688		11.7873	12.545	13.6982	16.767	0	0	0	0
FBgn0036125	-4.19252	2.77031	171.324	1.27375e-06	3.29638e-05	CG6279	CG6279		14.7436	13.1868	15.4105	14.2266	0.578775	0.2274	0.800993	1.03944
FBgn0263841	-5.29903	0.387798	168.006	1.30489e-06	3.33335e-05	CG43702	CG43702		2.8047	2.04221	2.44611	3.40421	0.0609237	0.0505333	0	0.0519722
FBgn0265648	-10.5925	2.13731	764.281	1.38035e-06	3.44085e-05	CR44455	lncRNA:CR44455	long non-coding RNA:CR44455	10.1576	8.28553	8.92829	11.4321	0	0	0	0
FBgn0261998	-3.13865	1.40431	162.888	1.46749e-06	3.58713e-05	CG42816	CG42816		5.87472	4.7846	5.38144	4.72525	0.426466	0.5306	0.364088	0.415777
FBgn0263829	-3.8745	-0.117011	160.38	1.55644e-06	3.73647e-05	CG34334	CG34334		2.19828	1.34202	1.46766	1.98156	0.0609237	0.0758	0.0728176	0.155917
FBgn0262968	-10.1101	1.66652	718.658	1.6045e-06	3.80717e-05	CR43279	lncRNA:CR43279	long non-coding RNA:CR43279	7.12547	5.83488	7.33832	7.46894	0	0	0	0
FBgn0028880	-9.64499	1.21658	704.926	1.68198e-06	3.93341e-05	CG15256	CG15256		4.88928	4.60955	5.44259	5.18253	0	0	0	0
FBgn0266384	-5.51399	0.831229	156.19	1.76631e-06	4.0067e-05	CR45026	asRNA:CR45026	antisense RNA:CR45026	4.20706	3.61763	3.17994	3.9123	0.0304618	0.0505333	0	0.155917
FBgn0262845	-5.71532	0.820409	154.659	1.84304e-06	4.11492e-05	CG43209	CG43209		3.90385	2.74239	2.44611	5.63981	0.0304618	0.0252667	0.0728176	0.103944
FBgn0262690	-6.1591	-0.536384	148.106	2.10379e-06	4.49362e-05	CR43160	asRNA:CR43160	antisense RNA:CR43160	1.36445	1.51707	1.10075	1.37185	0	0.0252667	0	0
FBgn0051784	-10.047	1.60646	638.16	2.14491e-06	4.5472e-05	CG31784	CG31784		7.73189	6.18497	5.44259	7.26571	0	0	0	0
FBgn0032374	-6.4062	0.388164	147.336	2.20113e-06	4.64038e-05	CG14931	CG14931		2.84261	2.56735	2.3238	3.09936	0.0304618	0	0.0728176	0
FBgn0085462	-6.40729	-0.301214	145.326	2.25984e-06	4.67561e-05	CG34433	CG34433		1.59186	1.69212	1.58997	1.57508	0	0	0	0.0519722
FBgn0019661	-2.31546	8.83899	142.948	2.40498e-06	4.83639e-05	CR32777	lncRNA:roX1	long non-coding RNA on the X	989.341	654.498	890.628	905.622	108.657	129.416	156.048	150.252
FBgn0262788	-9.19488	0.786949	598.566	2.50808e-06	4.93104e-05	CG43169	CG43169		3.44903	4.14276	3.30224	3.86149	0	0	0	0
FBgn0265625	-9.51733	1.09325	587.147	2.62884e-06	5.06219e-05	CG44433	CG44433		4.09335	4.49286	5.32028	4.52201	0	0	0	0
FBgn0261996	-3.69846	-0.567936	138.732	2.69227e-06	5.15763e-05	CG42814	CG42814		1.51606	1.05028	1.0396	1.27023	0.0304618	0.0758	0.0728176	0.103944
FBgn0261531	-9.37031	0.95378	579.139	2.71847e-06	5.18156e-05	CG42659	CG42659		3.90385	3.90937	4.03608	4.77606	0	0	0	0
FBgn0011270	-7.57794	1.96332	141.298	2.77147e-06	5.22161e-05	CG17645	Pglym87	Phosphoglyceromutase 87	11.8631	5.83488	6.91025	9.50131	0.0609237	0	0.0728176	0
FBgn0260644	-9.20227	0.794683	548.545	3.10348e-06	5.64097e-05	CG42536	CG42536		3.67644	3.73432	3.17994	4.21716	0	0	0	0
FBgn0261624	-5.61504	-0.348083	132.715	3.18098e-06	5.69653e-05	CG42707	I-3	Inhibitor-3	1.78137	1.40037	1.22305	1.72751	0	0.0252667	0	0.0519722
FBgn0267412	-9.12373	0.721322	542.797	3.18427e-06	5.69653e-05	CG45765	CG45765		3.97965	3.20918	3.11879	3.70907	0	0	0	0
FBgn0265255	-6.211	-0.489018	130.087	3.42921e-06	5.90872e-05	CR44269	lncRNA:CR44269	long non-coding RNA:CR44269	1.62976	1.22532	1.0396	1.62589	0	0.0252667	0	0
FBgn0034681	-7.54193	0.743143	127.429	3.87291e-06	6.42202e-05	CG9308	CG9308		4.58607	2.21725	2.62956	4.67444	0	0	0	0.0519722
FBgn0264081	-8.72776	0.347461	489.634	4.09436e-06	6.67216e-05	CG43750	CG43750		2.42569	2.56735	2.81302	2.84531	0	0	0	0
FBgn0259148	-9.12785	0.724962	488.634	4.11481e-06	6.68627e-05	CG42263	CG42263		3.90385	2.97579	3.30224	3.86149	0	0	0	0
FBgn0261614	-9.00149	0.604149	478.837	4.32304e-06	6.8962e-05	CG42703	CG42703		2.95631	3.03414	3.11879	3.75988	0	0	0	0
FBgn0250840	-9.96375	1.52418	458.659	4.80126e-06	7.36886e-05	CG12907	Withdrawn		5.76101	5.018	6.54334	7.72299	0	0	0	0
FBgn0261523	-6.21099	-0.474016	118.988	4.81326e-06	7.37621e-05	CG42658	CG42658		1.25075	1.75046	1.1619	1.47347	0	0	0	0.0519722
FBgn0083943	-9.8533	1.41688	455.108	4.89303e-06	7.42929e-05	CG34107	CG34107		4.73768	5.54314	5.62605	7.31652	0	0	0	0
FBgn0262017	-6.81342	1.25019	120.326	4.90043e-06	7.43057e-05	CG42830	CG42830		4.35866	4.55121	5.87066	5.63981	0	0	0.0728176	0.103944
FBgn0262361	-9.18638	0.779163	451.999	4.97544e-06	7.51417e-05	CG43059	CG43059		3.41113	3.44258	3.30224	4.4712	0	0	0	0
FBgn0026175	-6.13945	0.582081	117.891	5.14265e-06	7.65458e-05	CG11941	SkpC	SKP1-related C	2.8047	2.80074	2.87418	4.01392	0.0304618	0	0	0.103944
FBgn0085287	-8.38387	0.0300687	437.77	5.37857e-06	7.92256e-05	CG34258	CG34258		1.85717	2.21725	2.14034	2.18479	0	0	0	0
FBgn0262984	-8.08019	-0.242762	437.302	5.39257e-06	7.9247e-05	CG43292	CG43292		1.78137	1.69212	1.58997	1.72751	0	0	0	0
FBgn0264383	-8.79394	0.410868	417.732	6.02851e-06	8.54691e-05	CR43835	lncRNA:CR43835	long non-coding RNA:CR43835	2.99421	2.2756	2.81302	3.04855	0	0	0	0
FBgn0262967	-7.81744	1.7614	113.14	6.31674e-06	8.85593e-05	CR43278	lncRNA:CR43278	long non-coding RNA:CR43278	6.67065	6.24332	8.50022	8.12946	0	0	0.145635	0
FBgn0002673	-2.02324	2.17304	110.23	6.36862e-06	8.90797e-05	CG4965	twe	twine	8.1109	8.16883	7.52178	8.23108	1.46217	0.859066	1.96607	2.13086
FBgn0260996	-8.00503	-0.309079	396.226	6.85599e-06	9.40274e-05	CG42597	CG42597		1.81927	1.63377	1.46766	1.52427	0	0	0	0
FBgn0264543	-8.5254	0.162576	395.793	6.87425e-06	9.40745e-05	CG43922	CG43922		2.6531	1.92551	2.3238	2.33722	0	0	0	0
FBgn0053310	-3.04734	0.933519	104.868	7.66456e-06	0.000101201	CG33310	CG33310		3.60063	3.20918	3.4857	4.31878	0.152309	0.328467	0.436905	0.519722
FBgn0085267	-6.29029	-0.404094	104.907	7.82361e-06	0.000102822	CG34238	CG34238		1.40235	1.05028	1.52882	1.93075	0	0	0	0.0519722
FBgn0037307	-2.83242	0.817473	103.252	8.11865e-06	0.000105598	CG14666	Tim17a2	Tim17a2	3.60063	3.44258	3.05763	3.15017	0.243695	0.252667	0.29127	0.72761
FBgn0053704	-8.22563	-0.111416	368.492	8.17928e-06	0.000106022	CG33704	CG33704		2.00877	1.63377	1.77343	2.08317	0	0	0	0
FBgn0085692	-8.47842	0.118215	363.521	8.4538e-06	0.000108226	CG41561	CG41561		2.34989	1.80881	2.44611	2.33722	0	0	0	0
FBgn0265257	-5.88329	-0.085884	102.456	8.62086e-06	0.000109739	CG44271	CG44271		2.08458	1.57542	1.40651	2.43884	0.0304618	0	0.0728176	0
FBgn0262486	-8.75399	0.372152	359.302	8.69712e-06	0.000110368	CG43076	CG43076		2.34989	2.6257	2.50726	3.3534	0	0	0	0
FBgn0264563	-9.19295	0.785173	356.247	8.87949e-06	0.000111628	CG43935	CG43935		3.48693	2.85909	3.85262	4.4712	0	0	0	0
FBgn0262095	-5.44897	0.309583	101.548	8.93122e-06	0.000112048	CR42848	Withdrawn		3.03211	2.91744	1.46766	2.69288	0	0.0252667	0.0728176	0.103944
FBgn0085486	-6.08128	1.13736	101.784	9.1838e-06	0.000114088	CG34457	CG34457		5.07879	3.85102	4.09723	5.69062	0.0913855	0	0	0.103944
FBgn0085191	-6.00564	-0.62947	98.1743	9.92654e-06	0.000121453	CG34162	CG34162		1.32655	1.28367	1.10075	1.21942	0	0	0.0728176	0
FBgn0003254	-4.4488	-0.153492	95.4587	1.10312e-05	0.000133386	CG7230	rib	ribbon	2.50149	1.28367	1.65112	1.52427	0.0609237	0.0758	0	0.0519722
FBgn0262982	-8.41664	0.0630778	315.609	1.19157e-05	0.000142111	CG43290	CG43290		2.5773	1.69212	2.26265	2.03237	0	0	0	0
FBgn0005616	-1.00011	4.14062	90.7562	1.30663e-05	0.000152467	CG3241	msl-2	male-specific lethal 2	26.4552	26.1403	27.7633	25.3538	9.29086	7.7316	10.8498	14.5002	dosage compensation complex
FBgn0264472	-7.79985	-0.49218	300.838	1.33848e-05	0.000155385	CG43880	CG43880		1.32655	1.28367	1.34536	1.62589	0	0	0	0
FBgn0035768	-2.1613	0.318438	89.076	1.39938e-05	0.000160972	CG14834	CG14834		2.6152	1.92551	1.89573	2.08317	0.274157	0.277933	0.364088	0.623666
FBgn0053667	-5.11832	0.300456	89.3938	1.42762e-05	0.000163722	CG33667	CG33667		2.46359	2.04221	2.44611	2.99774	0	0.0252667	0.145635	0.103944
FBgn0262812	-7.99862	-0.317791	273.41	1.68741e-05	0.000187083	CG43183	CG43183		1.32655	1.63377	1.52882	1.93075	0	0	0	0
FBgn0261582	-8.42277	0.0674643	273.017	1.6933e-05	0.00018737	CG42692	CG42692		2.04668	1.98386	1.77343	2.7945	0	0	0	0
FBgn0031677	-3.40173	-0.0457997	83.4395	1.77749e-05	0.00019441	CG14036	CG14036		2.19828	1.28367	1.89573	1.82913	0.152309	0.101067	0.218453	0.0519722
FBgn0264260	-8.18433	-0.151753	251.028	2.07483e-05	0.000220344	CG43760	CG43760		1.55396	1.51707	2.14034	2.08317	0	0	0	0
FBgn0264464	-8.17007	-0.159296	221.369	2.81117e-05	0.000287765	CR43872	asRNA:CR43872	antisense RNA:CR43872	2.19828	1.45872	1.40651	2.13398	0	0	0	0
FBgn0262998	-7.78105	-0.504934	210.1	3.1887e-05	0.000322913	CR43306	lncRNA:CR43306	long non-coding RNA:CR43306	1.78137	1.05028	1.28421	1.37185	0	0	0	0
FBgn0262985	-2.13706	0.880583	69.7674	3.39935e-05	0.000340896	CG43293	CG43293		3.18372	2.56735	3.11879	3.96311	0.487389	0.328467	0.655358	0.935499
FBgn0053666	-5.83983	0.702741	70.1312	3.57778e-05	0.000357841	CG33666	CG33666		2.88051	2.56735	4.09723	4.01392	0	0	0.145635	0.103944
FBgn0038277	-2.38194	1.68696	66.0871	4.17889e-05	0.000411075	CG7014	RpS5b	Ribosomal protein S5b	7.58028	4.84295	4.83106	6.40195	0.517851	0.6064	1.09226	1.55917
FBgn0026147	-0.719583	5.07873	65.0931	4.35841e-05	0.000427247	CG16833	TTLL4A	Tubulin tyrosine ligase-like 4A	46.9977	48.3711	47.271	46.8968	22.0544	18.3689	23.156	27.3374
FBgn0063298	-4.96938	-0.433097	65.0298	4.49239e-05	0.000437738	CR31429	asRNA:CR31429	antisense RNA:CR31429	1.70556	1.40037	1.28421	1.27023	0	0	0.0728176	0.103944
FBgn0265041	-3.57604	0.0356621	64.8538	4.52487e-05	0.000440524	CG44158	CG44158		2.50149	1.69212	1.65112	1.87994	0.0304618	0.126333	0.29127	0.103944
FBgn0263088	-4.15047	-0.418578	64.5745	4.59674e-05	0.00044599	CR43356	lncRNA:CR43356	long non-coding RNA:CR43356	1.09914	1.22532	1.34536	1.98156	0.0304618	0.101067	0	0.0519722
FBgn0262882	-8.03013	-0.289371	176.67	4.83856e-05	0.000466261	CG43237	CG43237		1.32655	1.40037	1.52882	2.28641	0	0	0	0
FBgn0267163	-3.18968	0.607714	61.14	5.5906e-05	0.000528845	CG45603	CG45603		2.50149	2.74239	3.05763	3.30259	0.121847	0.101067	0.509723	0.415777
FBgn0053665	-5.1807	0.611112	60.6606	5.97479e-05	0.000561442	CG33665	CG33665		2.99421	1.86716	3.73031	3.9123	0.0304618	0	0.218453	0.103944
FBgn0085316	-8.13128	-0.193495	161.66	6.12552e-05	0.000574654	CG34287	CG34287		2.27408	1.16698	1.46766	2.08317	0	0	0	0
FBgn0250825	-4.73975	1.38832	59.9258	6.23575e-05	0.000583547	CG34241	CG34241		5.4578	4.9013	4.28069	7.36733	0.182771	0.252667	0	0.0519722
FBgn0026592	-1.44879	0.814785	58.7674	6.26775e-05	0.000586058	CG1079	Fie	Fire exit	2.99421	2.85909	2.81302	2.38803	0.548313	0.758	0.800993	1.09142
FBgn0004882	-2.45274	3.20489	55.3065	8.25079e-05	0.00075835	CG10868	orb	oo18 RNA-binding protein	15.9944	17.563	17.9789	18.0881	1.12709	1.56653	4.1506	3.84594
FBgn0263974	-1.03391	1.4776	51.5703	9.91408e-05	0.000901006	CG43726	qin	qin	4.35866	4.02607	4.28069	3.70907	1.43171	1.4402	1.60199	1.76705
FBgn0053669	-8.33532	-0.017232	129.39	0.00010684	0.000968645	CG33669	CG33669		1.21285	1.75046	2.44611	2.69288	0	0	0	0
FBgn0264353	-5.08487	-0.746003	47.232	0.000138598	0.00124958	CR43809	asRNA:CR43809	antisense RNA:CR43809	1.13704	1.16698	1.10075	1.01618	0	0	0.145635	0
FBgn0000146	-1.69802	1.66758	44.374	0.000166548	0.00148622	CG6137	aub	aubergine	6.70855	4.60955	5.6872	4.31878	1.37078	0.732733	1.16508	2.02691
FBgn0260758	-1.38686	3.10683	42.8995	0.000189398	0.00168038	CG42556	CG42556		15.009	14.6455	12.9032	13.2104	2.40649	3.1836	5.89822	5.92483
FBgn0038296	-1.28746	4.12485	40.8151	0.000225783	0.00198977	CG6752	CG6752		31.4203	30.4581	24.5834	25.0489	6.03144	5.78606	11.7236	13.9285
FBgn0031091	-1.08093	2.52535	40.4014	0.00022902	0.00201454	CG9576	Phf7	PHD finger protein 7	8.71732	8.05213	9.96789	8.02784	3.47265	2.653	2.69425	4.05383
FBgn0263628	-2.26092	0.508924	40.5209	0.000229675	0.0020178	CR43637	asRNA:CR43637	antisense RNA:CR43637	3.18372	1.80881	1.71227	3.20098	0.487389	0.2274	0.29127	0.623666
FBgn0261349	-3.22159	1.49994	40.257	0.000243677	0.0021375	CG42626	Mst36Fb	Male-specific transcript 36Fb	6.51904	3.73432	4.95337	6.96085	0.182771	0.176867	0.728176	1.03944
FBgn0004650	-3.28536	0.0194259	36.9453	0.000319541	0.00277932	CG11411	fs(1)N	female sterile (1) Nasrat	1.81927	1.69212	2.14034	1.93075	0.121847	0.0758	0	0.415777
FBgn0267777	-3.58855	-0.418303	34.7469	0.000390963	0.00336888	CR46108	lncRNA:CR46108	long non-coding RNA:CR46108	1.59186	1.28367	1.28421	1.27023	0	0.0505333	0.29127	0.103944
FBgn0266111	-0.664605	4.65531	34.4058	0.000391185	0.00336888	CG13162	ana3	anastral spindle 3	33.05	32.7337	35.0405	38.1069	13.9515	13.6945	20.9715	21.5685
FBgn0262526	-1.85825	-0.0385536	30.5055	0.000578914	0.00489273	CG46283	vas	vasa	1.40235	1.40037	1.65112	1.77832	0.33508	0.126333	0.582541	0.415777
FBgn0263469	-1.5816	0.526541	30.0527	0.000607376	0.00511043	CR43584	snoRNA:SC35-b		3.03211	2.04221	2.3238	1.72751	0.365542	0.404267	0.728176	1.03944
FBgn0037763	-3.54183	-0.0208041	28.2948	0.000765565	0.00637989	CG16904	CG16904		2.27408	1.45872	1.58997	2.13398	0.182771	0.176867	0	0
FBgn0264427	-3.5103	0.0798483	28.2624	0.000768328	0.00639822	CG43845	CG43845		2.04668	1.69212	1.83458	2.33722	0.0304618	0.0252667	0.509723	0.155917
FBgn0265046	-1.27471	-0.185556	26.7282	0.000881566	0.00726651	CG44163	CG44163		1.17494	1.05028	1.28421	1.52427	0.396004	0.2274	0.509723	0.571694
FBgn0264310	-2.47265	1.14006	25.425	0.0010682	0.00870993	CR43785	lncRNA:CR43785	long non-coding RNA:CR43785	4.54817	3.38423	4.34184	3.81069	0.243695	0.176867	1.09226	1.09142
FBgn0263747	-1.38811	0.680776	23.5843	0.00129951	0.0105054	CG43672	CG43672		3.07001	2.10056	1.95689	2.74369	0.578775	0.9096	0.728176	0.623666
FBgn0250816	-0.894422	2.45501	23.1669	0.00137235	0.0110548	CG40300	2020-08-03	Argonaute 3	7.01176	9.51085	6.66564	8.53594	2.61972	2.24873	4.22342	4.78144
FBgn0003483	-0.920507	2.57348	22.2932	0.00154211	0.0123609	CG3158	spn-E	spindle E	10.006	8.86902	7.64408	8.18027	2.58926	2.29927	4.87878	5.24919
FBgn0082957	-1.24701	1.84801	21.6234	0.00169948	0.0135552	CR34623	snoRNA:Psi28S-3405d	snoRNA:Psi28S-3405d	6.25373	6.18497	4.83106	5.08091	1.00524	1.33913	2.11171	3.32622
FBgn0031610	-0.654136	2.11219	20.6778	0.00193169	0.0153319	CG15436	CG15436		6.55694	5.07635	5.38144	6.35114	2.58926	2.4256	2.98552	3.79397
FBgn0265068	-0.811715	1.63142	20.2791	0.00204628	0.0161961	CR44179	asRNA:CR44179	antisense RNA:CR44179	4.01755	5.30974	3.97492	4.06473	1.79725	1.38967	1.82044	2.91044
FBgn0039449	-0.986143	0.782706	20.2188	0.00206436	0.0163277	CG6425	CG6425		2.31199	2.80074	2.50726	2.18479	0.700622	0.707466	1.52917	1.09142
FBgn0022981	-1.42464	1.35087	20.0139	0.00214826	0.0169323	CG1058	rpk	ripped pocket	4.24496	3.73432	3.54686	4.62363	0.578775	0.732733	1.74762	2.02691
FBgn0082986	-1.34969	1.23923	19.6323	0.00226456	0.0177748	CR34616	snoRNA:Psi28S-2562	snoRNA:Psi28S-2562	5.07879	3.03414	3.17994	3.40421	0.639699	0.732733	1.52917	1.92297
FBgn0265299	-0.943619	-0.0891658	19.5288	0.00228611	0.0179315	CR44272	lncRNA:CR44272	long non-coding RNA:CR44272	1.25075	1.28367	1.10075	1.42266	0.517851	0.353733	0.436905	0.779583
FBgn0065073	-2.11067	0.364474	18.9026	0.00256683	0.0199541	CR33684	snoRNA:229	snoRNA:229	1.36445	3.09249	2.56841	1.77832	0.182771	0.202133	0.946629	0.46775
FBgn0261928	-1.22513	2.46475	17.2724	0.00329552	0.0253237	CG42795	CG42795		5.79892	10.2694	9.90673	8.38351	2.10187	1.516	4.36905	4.20975
FBgn0250826	-2.13786	1.28019	16.933	0.00353191	0.0270303	CG34160	CG34160		4.05545	4.37616	4.03608	4.67444	0.213233	0.3032	1.45635	1.50719
FBgn0065058	-0.919075	0.748702	16.4352	0.00374392	0.0285433	CR33794	snoRNA:684	snoRNA:684	2.12248	2.45065	2.38495	2.43884	0.700622	0.6064	1.45635	1.35128
FBgn0262966	-3.18854	0.606539	16.2562	0.00395572	0.0299905	CG43277	CG43277		3.79014	2.45065	2.75187	2.59127	0	0.0758	0.29127	0.831555
FBgn0037290	-0.888001	4.10706	15.7105	0.00429075	0.0323575	CG1124	CG1124		32.0267	23.6896	28.1914	16.9194	12.6721	7.4284	10.1216	12.5773
FBgn0085479	-1.71009	1.58965	15.7286	0.00433131	0.0326416	CG34450	CG34450		4.62397	5.19304	4.89221	5.43658	0.487389	0.5306	2.25734	2.07889
FBgn0053200	-1.25273	0.125264	15.458	0.0044384	0.0333601	CG33200	VepD	Ventrally-expressed protein D	1.21285	1.80881	2.01804	1.37185	0.396004	0.328467	0.436905	1.03944
FBgn0262858	-1.49758	1.28952	14.4007	0.00544327	0.0405635	CG43222	CG43222		4.73768	3.03414	2.56841	5.28415	0.548313	0.656933	1.31072	2.18283
FBgn0037924	-0.717032	4.16619	13.9439	0.00590733	0.0436617	CG14712	CG14712		24.7117	27.8324	25.3784	22.5593	8.40747	7.959	18.2772	15.0719

## Sheet: G0 S–W– vs. S+W–
GO enrichment of 16 upregulated genes at T2 in S–W– vs. S+W– comparison*.
GO Term	Pvalue	Gene_id	GO	Number of genes
N/A	N/A	N/A	N/A	N/A
*No enrichment found.
GO enrichment of 1476 downegulated genes at T2 in S–W– vs. S+W– comparison. Number of Genes in this list not analysed in this widget: 784
GO Term	Pvalue	Gene_id	GO	Number of genes
cilium organization	1.05096e-24	FBgn0003950,FBgn0004172,FBgn0004173,FBgn0004174,FBgn0004175,FBgn0023090,FBgn0027513,FBgn0028858,FBgn0028902,FBgn0029993,FBgn0030004,FBgn0030247,FBgn0031707,FBgn0031853,FBgn0032291,FBgn0032345,FBgn0032478,FBgn0032520,FBgn0033447,FBgn0033623,FBgn0034352,FBgn0034740,FBgn0034816,FBgn0034827,FBgn0035168,FBgn0035497,FBgn0035638,FBgn0035799,FBgn0036206,FBgn0036652,FBgn0036687,FBgn0036995,FBgn0037059,FBg…	GO:0044782	53
male gamete generation	6.30606e-23	FBgn0000615,FBgn0002673,FBgn0002715,FBgn0002842,FBgn0002862,FBgn0002865,FBgn0003009,FBgn0003950,FBgn0004171,FBgn0004172,FBgn0004173,FBgn0004174,FBgn0004175,FBgn0004372,FBgn0004581,FBgn0011206,FBgn0011239,FBgn0011569,FBgn0013300,FBgn0013301,FBgn0014342,FBgn0016034,FBgn0019828,FBgn0020399,FBgn0028379,FBgn0030313,FBgn0031091,FBgn0031728,FBgn0031853,FBgn0031905,FBgn0032089,FBgn0032104,FBgn0032473,FBg…	GO:0048232	83
spermatogenesis	1.72841e-22	FBgn0000615,FBgn0002673,FBgn0002842,FBgn0002862,FBgn0002865,FBgn0003950,FBgn0004171,FBgn0004172,FBgn0004173,FBgn0004174,FBgn0004175,FBgn0004372,FBgn0004581,FBgn0011206,FBgn0011239,FBgn0011569,FBgn0013300,FBgn0013301,FBgn0014342,FBgn0016034,FBgn0019828,FBgn0020399,FBgn0028379,FBgn0030313,FBgn0031091,FBgn0031728,FBgn0031853,FBgn0031905,FBgn0032089,FBgn0032473,FBgn0032492,FBgn0033447,FBgn0033748,FBg…	GO:0007283	76
cilium movement	2.13187e-22	FBgn0001313,FBgn0013810,FBgn0013811,FBgn0013813,FBgn0028902,FBgn0029993,FBgn0030004,FBgn0032291,FBgn0032345,FBgn0032520,FBgn0033623,FBgn0034566,FBgn0034816,FBgn0035581,FBgn0035638,FBgn0035799,FBgn0037059,FBgn0037276,FBgn0037726,FBgn0037962,FBgn0040696,FBgn0051320,FBgn0051803,FBgn0085454,FBgn0262123,FBgn0263988,FBgn0267432,FBgn0283476	GO:0003341	28
cilium assembly	2.89655e-22	FBgn0003950,FBgn0004172,FBgn0004173,FBgn0004174,FBgn0004175,FBgn0023090,FBgn0028858,FBgn0028902,FBgn0029993,FBgn0030004,FBgn0030247,FBgn0031707,FBgn0031853,FBgn0032291,FBgn0032345,FBgn0032478,FBgn0032520,FBgn0033447,FBgn0033623,FBgn0034352,FBgn0034740,FBgn0034816,FBgn0034827,FBgn0035168,FBgn0035497,FBgn0035638,FBgn0035799,FBgn0036206,FBgn0036652,FBgn0036995,FBgn0037059,FBgn0037276,FBgn0037962,FBg…	GO:0060271	48
axoneme assembly	4.29869e-18	FBgn0004172,FBgn0004173,FBgn0004174,FBgn0004175,FBgn0028858,FBgn0029993,FBgn0030004,FBgn0031853,FBgn0032345,FBgn0032478,FBgn0032520,FBgn0033447,FBgn0033623,FBgn0034352,FBgn0034740,FBgn0034827,FBgn0035799,FBgn0037059,FBgn0037276,FBgn0037962,FBgn0038607,FBgn0051320,FBgn0051803,FBgn0083960,FBgn0262123,FBgn0264307,FBgn0266709,FBgn0267432	GO:0035082	28
cilium or flagellum-dependent cell motility	5.35347e-17	FBgn0004172,FBgn0004173,FBgn0004174,FBgn0004175,FBgn0028902,FBgn0029667,FBgn0030004,FBgn0032291,FBgn0033447,FBgn0034740,FBgn0034816,FBgn0034827,FBgn0035491,FBgn0035638,FBgn0036437,FBgn0037059,FBgn0037276,FBgn0038607,FBgn0040291,FBgn0041195,FBgn0051320,FBgn0051803,FBgn0083946,FBgn0083960,FBgn0264307,FBgn0266709,FBgn0267326,FBgn0267363	GO:0001539	28
cilium-dependent cell motility	5.35347e-17	FBgn0004172,FBgn0004173,FBgn0004174,FBgn0004175,FBgn0028902,FBgn0029667,FBgn0030004,FBgn0032291,FBgn0033447,FBgn0034740,FBgn0034816,FBgn0034827,FBgn0035491,FBgn0035638,FBgn0036437,FBgn0037059,FBgn0037276,FBgn0038607,FBgn0040291,FBgn0041195,FBgn0051320,FBgn0051803,FBgn0083946,FBgn0083960,FBgn0264307,FBgn0266709,FBgn0267326,FBgn0267363	GO:0060285	28
spermatid differentiation	1.69245e-14	FBgn0002842,FBgn0002865,FBgn0004171,FBgn0004172,FBgn0004173,FBgn0004174,FBgn0004175,FBgn0004372,FBgn0011239,FBgn0011569,FBgn0013300,FBgn0013301,FBgn0014342,FBgn0019828,FBgn0028379,FBgn0031853,FBgn0031905,FBgn0032492,FBgn0033447,FBgn0034740,FBgn0034827,FBgn0035461,FBgn0035608,FBgn0036568,FBgn0036895,FBgn0038225,FBgn0038607,FBgn0039124,FBgn0039707,FBgn0040038,FBgn0043025,FBgn0051281,FBgn0083960,FBg…	GO:0048515	41
microtubule-based process	4.80328e-14	FBgn0000147,FBgn0001313,FBgn0002873,FBgn0003889,FBgn0004172,FBgn0004173,FBgn0004174,FBgn0004175,FBgn0013810,FBgn0013811,FBgn0013813,FBgn0016034,FBgn0026141,FBgn0027513,FBgn0028567,FBgn0028569,FBgn0028858,FBgn0028901,FBgn0028902,FBgn0029656,FBgn0029993,FBgn0030004,FBgn0030191,FBgn0031585,FBgn0031853,FBgn0032291,FBgn0032345,FBgn0032478,FBgn0032520,FBgn0033447,FBgn0033623,FBgn0033687,FBgn0034352,FBg…	GO:0007017	85
microtubule bundle formation	4.81404e-14	FBgn0004172,FBgn0004173,FBgn0004174,FBgn0004175,FBgn0028858,FBgn0029993,FBgn0030004,FBgn0031853,FBgn0032345,FBgn0032478,FBgn0032520,FBgn0033447,FBgn0033623,FBgn0034352,FBgn0034740,FBgn0034827,FBgn0035799,FBgn0037059,FBgn0037276,FBgn0037962,FBgn0038607,FBgn0051320,FBgn0051803,FBgn0083960,FBgn0262123,FBgn0264307,FBgn0266709,FBgn0267432	GO:0001578	28
plasma membrane bounded cell projection assembly	1.30416e-13	FBgn0003950,FBgn0004172,FBgn0004173,FBgn0004174,FBgn0004175,FBgn0023090,FBgn0028858,FBgn0028902,FBgn0029993,FBgn0030004,FBgn0030247,FBgn0031707,FBgn0031853,FBgn0032291,FBgn0032345,FBgn0032478,FBgn0032520,FBgn0033447,FBgn0033623,FBgn0034352,FBgn0034740,FBgn0034816,FBgn0034827,FBgn0035168,FBgn0035497,FBgn0035638,FBgn0035799,FBgn0036206,FBgn0036652,FBgn0036995,FBgn0037059,FBgn0037276,FBgn0037962,FBg…	GO:0120031	48
cell projection assembly	1.92919e-12	FBgn0003950,FBgn0004172,FBgn0004173,FBgn0004174,FBgn0004175,FBgn0023090,FBgn0028858,FBgn0028902,FBgn0029993,FBgn0030004,FBgn0030247,FBgn0031707,FBgn0031853,FBgn0032291,FBgn0032345,FBgn0032478,FBgn0032520,FBgn0033447,FBgn0033623,FBgn0034352,FBgn0034740,FBgn0034816,FBgn0034827,FBgn0035168,FBgn0035497,FBgn0035638,FBgn0035799,FBgn0036206,FBgn0036652,FBgn0036995,FBgn0037059,FBgn0037276,FBgn0037962,FBg…	GO:0030031	48
spermatid development	1.47371e-11	FBgn0002842,FBgn0002865,FBgn0004171,FBgn0004172,FBgn0004173,FBgn0004174,FBgn0004175,FBgn0004372,FBgn0011569,FBgn0013300,FBgn0013301,FBgn0014342,FBgn0019828,FBgn0028379,FBgn0031853,FBgn0031905,FBgn0032492,FBgn0033447,FBgn0034740,FBgn0034827,FBgn0035461,FBgn0035608,FBgn0038225,FBgn0038607,FBgn0039707,FBgn0040038,FBgn0043025,FBgn0051281,FBgn0083960,FBgn0086907,FBgn0086915,FBgn0259701,FBgn0264307,FBg…	GO:0007286	36
microtubule-based movement	2.88192e-11	FBgn0001313,FBgn0013810,FBgn0013811,FBgn0013813,FBgn0028567,FBgn0028569,FBgn0028902,FBgn0029993,FBgn0030004,FBgn0032291,FBgn0032345,FBgn0032520,FBgn0033447,FBgn0033623,FBgn0034478,FBgn0034566,FBgn0034816,FBgn0034824,FBgn0034827,FBgn0035009,FBgn0035581,FBgn0035638,FBgn0035799,FBgn0036499,FBgn0036687,FBgn0037059,FBgn0037276,FBgn0037726,FBgn0037962,FBgn0039246,FBgn0040696,FBgn0051320,FBgn0051803,FBg…	GO:0007018	42
organelle assembly	7.00546e-11	FBgn0002873,FBgn0003950,FBgn0004172,FBgn0004173,FBgn0004174,FBgn0004175,FBgn0023090,FBgn0027494,FBgn0027513,FBgn0028858,FBgn0028901,FBgn0028902,FBgn0029993,FBgn0030004,FBgn0030191,FBgn0030247,FBgn0031585,FBgn0031707,FBgn0031853,FBgn0032291,FBgn0032345,FBgn0032478,FBgn0032520,FBgn0033447,FBgn0033623,FBgn0034352,FBgn0034435,FBgn0034740,FBgn0034816,FBgn0034827,FBgn0035168,FBgn0035497,FBgn0035638,FBg…	GO:0070925	71
flagellated sperm motility	1.65829e-10	FBgn0004172,FBgn0004173,FBgn0004174,FBgn0004175,FBgn0029667,FBgn0033447,FBgn0034740,FBgn0034827,FBgn0035491,FBgn0036437,FBgn0038607,FBgn0040291,FBgn0041195,FBgn0051320,FBgn0083946,FBgn0083960,FBgn0264307,FBgn0266709,FBgn0267326,FBgn0267363	GO:0030317	20
sperm motility	1.65829e-10	FBgn0004172,FBgn0004173,FBgn0004174,FBgn0004175,FBgn0029667,FBgn0033447,FBgn0034740,FBgn0034827,FBgn0035491,FBgn0036437,FBgn0038607,FBgn0040291,FBgn0041195,FBgn0051320,FBgn0083946,FBgn0083960,FBgn0264307,FBgn0266709,FBgn0267326,FBgn0267363	GO:0097722	20
axonemal dynein complex assembly	2.64951e-10	FBgn0028858,FBgn0029993,FBgn0030004,FBgn0032345,FBgn0032520,FBgn0033623,FBgn0034352,FBgn0035799,FBgn0037059,FBgn0037276,FBgn0037962,FBgn0051320,FBgn0262123,FBgn0266709,FBgn0267432	GO:0070286	15
ATP metabolic process	4.56389e-08	FBgn0011270,FBgn0030975,FBgn0031451,FBgn0031462,FBgn0031831,FBgn0031941,FBgn0032464,FBgn0033020,FBgn0033274,FBgn0033885,FBgn0034007,FBgn0034173,FBgn0034251,FBgn0035585,FBgn0036222,FBgn0036345,FBgn0036568,FBgn0036706,FBgn0036723,FBgn0036830,FBgn0037115,FBgn0037172,FBgn0037579,FBgn0037860,FBgn0038258,FBgn0038952,FBgn0039331,FBgn0039425,FBgn0039576,FBgn0039651,FBgn0039669,FBgn0042710,FBgn0042711,FBg…	GO:0046034	37
generation of precursor metabolites and energy	3.4422e-07	FBgn0011270,FBgn0029890,FBgn0030975,FBgn0031451,FBgn0031462,FBgn0031831,FBgn0033020,FBgn0033274,FBgn0033885,FBgn0034007,FBgn0034105,FBgn0034173,FBgn0034251,FBgn0035005,FBgn0036160,FBgn0036162,FBgn0036222,FBgn0036327,FBgn0036328,FBgn0036568,FBgn0036706,FBgn0036723,FBgn0036830,FBgn0036941,FBgn0037115,FBgn0037172,FBgn0037579,FBgn0037860,FBgn0037862,FBgn0037970,FBgn0037988,FBgn0038258,FBgn0038708,FBg…	GO:0006091	44
aerobic respiration	1.42999e-06	FBgn0029890,FBgn0030975,FBgn0031831,FBgn0033020,FBgn0033274,FBgn0034105,FBgn0035005,FBgn0036162,FBgn0036222,FBgn0036327,FBgn0036328,FBgn0036830,FBgn0037579,FBgn0037860,FBgn0037862,FBgn0037988,FBgn0038708,FBgn0039576,FBgn0039669,FBgn0050354,FBgn0051874,FBgn0086907	GO:0009060	22
microtubule cytoskeleton organization	6.64109e-06	FBgn0000147,FBgn0002873,FBgn0003889,FBgn0004172,FBgn0004173,FBgn0004174,FBgn0004175,FBgn0016034,FBgn0027513,FBgn0028858,FBgn0028901,FBgn0029656,FBgn0029993,FBgn0030004,FBgn0030191,FBgn0031585,FBgn0031853,FBgn0032345,FBgn0032478,FBgn0032520,FBgn0033447,FBgn0033623,FBgn0034352,FBgn0034435,FBgn0034740,FBgn0034816,FBgn0034827,FBgn0035799,FBgn0035800,FBgn0036354,FBgn0036652,FBgn0037059,FBgn0037276,FBg…	GO:0000226	57
cellular respiration	1.54217e-05	FBgn0029890,FBgn0030975,FBgn0031831,FBgn0033020,FBgn0033274,FBgn0033885,FBgn0034007,FBgn0034105,FBgn0034251,FBgn0035005,FBgn0036162,FBgn0036222,FBgn0036327,FBgn0036328,FBgn0036706,FBgn0036830,FBgn0037172,FBgn0037579,FBgn0037860,FBgn0037862,FBgn0037970,FBgn0037988,FBgn0038708,FBgn0039331,FBgn0039576,FBgn0039651,FBgn0039669,FBgn0050354,FBgn0051874,FBgn0086907	GO:0045333	30
mitochondrial transport	2.84033e-05	FBgn0011244,FBgn0020371,FBgn0030620,FBgn0031164,FBgn0031728,FBgn0031758,FBgn0031831,FBgn0032525,FBgn0032971,FBgn0033074,FBgn0034835,FBgn0035078,FBgn0035568,FBgn0036204,FBgn0036568,FBgn0037307,FBgn0037310,FBgn0037828,FBgn0037970,FBgn0038018,FBgn0038355,FBgn0039463,FBgn0039651,FBgn0050412,FBgn0052832,FBgn0069354,FBgn0265265	GO:0006839	27
mitochondrial transmembrane transport	0.000122425	FBgn0011244,FBgn0020371,FBgn0031164,FBgn0031728,FBgn0031831,FBgn0032525,FBgn0032971,FBgn0033074,FBgn0035078,FBgn0036568,FBgn0037307,FBgn0037310,FBgn0037828,FBgn0037970,FBgn0038018,FBgn0038355,FBgn0039651,FBgn0052832,FBgn0265265	GO:1990542	19
outer dynein arm assembly	0.000147244	FBgn0028858,FBgn0029993,FBgn0032345,FBgn0032520,FBgn0035799,FBgn0051320,FBgn0266709,FBgn0267432	GO:0036158	8
proton transmembrane transport	0.000253862	FBgn0028667,FBgn0028668,FBgn0028669,FBgn0031757,FBgn0031758,FBgn0031831,FBgn0031941,FBgn0032294,FBgn0032464,FBgn0033706,FBgn0035585,FBgn0036345,FBgn0036568,FBgn0037402,FBgn0039058,FBgn0039651,FBgn0039669,FBgn0051477,FBgn0267363,FBgn0285943	GO:1902600	20
energy derivation by oxidation of organic compounds	0.000267149	FBgn0029890,FBgn0030975,FBgn0031831,FBgn0033020,FBgn0033274,FBgn0033885,FBgn0034007,FBgn0034105,FBgn0034251,FBgn0035005,FBgn0036160,FBgn0036162,FBgn0036222,FBgn0036327,FBgn0036328,FBgn0036706,FBgn0036830,FBgn0036941,FBgn0037172,FBgn0037579,FBgn0037860,FBgn0037862,FBgn0037970,FBgn0037988,FBgn0038708,FBgn0039331,FBgn0039576,FBgn0039651,FBgn0039669,FBgn0050354,FBgn0051874,FBgn0086907	GO:0015980	32
protein targeting to mitochondrion	0.000563999	FBgn0011244,FBgn0020371,FBgn0030620,FBgn0031164,FBgn0031728,FBgn0032525,FBgn0032971,FBgn0033074,FBgn0034835,FBgn0036204,FBgn0037307,FBgn0037310,FBgn0037828,FBgn0038018,FBgn0038355,FBgn0039463,FBgn0050412,FBgn0265265	GO:0006626	18
protein localization to mitochondrion	0.000563999	FBgn0011244,FBgn0020371,FBgn0030620,FBgn0031164,FBgn0031728,FBgn0032525,FBgn0032971,FBgn0033074,FBgn0034835,FBgn0036204,FBgn0037307,FBgn0037310,FBgn0037828,FBgn0038018,FBgn0038355,FBgn0039463,FBgn0050412,FBgn0265265	GO:0070585	18
establishment of protein localization to mitochondrion	0.000563999	FBgn0011244,FBgn0020371,FBgn0030620,FBgn0031164,FBgn0031728,FBgn0032525,FBgn0032971,FBgn0033074,FBgn0034835,FBgn0036204,FBgn0037307,FBgn0037310,FBgn0037828,FBgn0038018,FBgn0038355,FBgn0039463,FBgn0050412,FBgn0265265	GO:0072655	18
tricarboxylic acid cycle	0.000720368	FBgn0029890,FBgn0030975,FBgn0033274,FBgn0034105,FBgn0035005,FBgn0036162,FBgn0036222,FBgn0036327,FBgn0036328,FBgn0037860,FBgn0037862,FBgn0037988,FBgn0038708,FBgn0051874	GO:0006099	14
inner dynein arm assembly	0.00080275	FBgn0032345,FBgn0033623,FBgn0037276,FBgn0037962,FBgn0051320,FBgn0266709	GO:0036159	6
sperm axoneme assembly	0.0016657	FBgn0004172,FBgn0004173,FBgn0004174,FBgn0004175,FBgn0033447,FBgn0034740,FBgn0034827,FBgn0038607,FBgn0083960,FBgn0264307	GO:0007288	10
nucleoside diphosphate phosphorylation	0.00323548	FBgn0011270,FBgn0028997,FBgn0031451,FBgn0031462,FBgn0034173,FBgn0036723,FBgn0037115,FBgn0038258,FBgn0038952,FBgn0039425,FBgn0042710,FBgn0042711	GO:0006165	12
ubiquitin-dependent protein catabolic process	0.0035852	FBgn0017456,FBgn0017556,FBgn0026174,FBgn0026175,FBgn0026176,FBgn0029745,FBgn0029812,FBgn0030370,FBgn0030429,FBgn0030918,FBgn0031301,FBgn0031442,FBgn0031443,FBgn0032047,FBgn0032492,FBgn0032878,FBgn0034842,FBgn0034863,FBgn0034937,FBgn0035461,FBgn0035584,FBgn0036082,FBgn0036224,FBgn0036465,FBgn0036703,FBgn0037296,FBgn0037325,FBgn0037742,FBgn0037987,FBgn0038125,FBgn0038202,FBgn0038445,FBgn0039147,FBg…	GO:0006511	46
phosphate-containing compound metabolic process	0.00389171	FBgn0000147,FBgn0000274,FBgn0001281,FBgn0002673,FBgn0003132,FBgn0003140,FBgn0005778,FBgn0011270,FBgn0015300,FBgn0025573,FBgn0025821,FBgn0028410,FBgn0028848,FBgn0028997,FBgn0029722,FBgn0029949,FBgn0030384,FBgn0030661,FBgn0030697,FBgn0030975,FBgn0031279,FBgn0031441,FBgn0031451,FBgn0031462,FBgn0031463,FBgn0031784,FBgn0031831,FBgn0031941,FBgn0032522,FBgn0032626,FBgn0032632,FBgn0032650,FBgn0032677,FBg…	GO:0006796	113
modification-dependent macromolecule catabolic process	0.00398969	FBgn0017456,FBgn0017556,FBgn0026174,FBgn0026175,FBgn0026176,FBgn0029745,FBgn0029812,FBgn0030370,FBgn0030429,FBgn0030918,FBgn0031301,FBgn0031442,FBgn0031443,FBgn0032047,FBgn0032492,FBgn0032878,FBgn0034842,FBgn0034863,FBgn0034937,FBgn0035461,FBgn0035584,FBgn0036082,FBgn0036224,FBgn0036465,FBgn0036703,FBgn0037296,FBgn0037325,FBgn0037742,FBgn0037987,FBgn0038125,FBgn0038202,FBgn0038445,FBgn0039147,FBg…	GO:0043632	47
nucleotide phosphorylation	0.00485432	FBgn0011270,FBgn0028997,FBgn0031451,FBgn0031462,FBgn0034173,FBgn0036723,FBgn0037115,FBgn0038258,FBgn0038952,FBgn0039425,FBgn0042710,FBgn0042711	GO:0046939	12
modification-dependent protein catabolic process	0.00520706	FBgn0017456,FBgn0017556,FBgn0026174,FBgn0026175,FBgn0026176,FBgn0029745,FBgn0029812,FBgn0030370,FBgn0030429,FBgn0030918,FBgn0031301,FBgn0031442,FBgn0031443,FBgn0032047,FBgn0032492,FBgn0032878,FBgn0034842,FBgn0034863,FBgn0034937,FBgn0035461,FBgn0035584,FBgn0036082,FBgn0036224,FBgn0036465,FBgn0036703,FBgn0037296,FBgn0037325,FBgn0037742,FBgn0037987,FBgn0038125,FBgn0038202,FBgn0038445,FBgn0039147,FBg…	GO:0019941	46
glycolytic process	0.00539515	FBgn0011270,FBgn0031451,FBgn0031462,FBgn0034173,FBgn0036723,FBgn0037115,FBgn0038258,FBgn0038952,FBgn0039425,FBgn0042710,FBgn0042711	GO:0006096	11
ATP generation from ADP	0.00539515	FBgn0011270,FBgn0031451,FBgn0031462,FBgn0034173,FBgn0036723,FBgn0037115,FBgn0038258,FBgn0038952,FBgn0039425,FBgn0042710,FBgn0042711	GO:0006757	11
organic substance catabolic process	0.00844488	FBgn0000146,FBgn0003483,FBgn0011206,FBgn0011270,FBgn0017456,FBgn0017556,FBgn0026174,FBgn0026175,FBgn0026176,FBgn0028852,FBgn0028935,FBgn0029745,FBgn0029812,FBgn0029945,FBgn0030370,FBgn0030429,FBgn0030918,FBgn0031301,FBgn0031426,FBgn0031442,FBgn0031443,FBgn0031451,FBgn0031462,FBgn0032003,FBgn0032047,FBgn0032089,FBgn0032372,FBgn0032492,FBgn0032878,FBgn0032973,FBgn0033933,FBgn0033952,FBgn0034173,FBg…	GO:1901575	95
phosphorus metabolic process	0.00961829	FBgn0000147,FBgn0000274,FBgn0001281,FBgn0002673,FBgn0003132,FBgn0003140,FBgn0005778,FBgn0011270,FBgn0015300,FBgn0025573,FBgn0025821,FBgn0028410,FBgn0028848,FBgn0028997,FBgn0029722,FBgn0029949,FBgn0030384,FBgn0030661,FBgn0030697,FBgn0030975,FBgn0031279,FBgn0031441,FBgn0031451,FBgn0031462,FBgn0031463,FBgn0031784,FBgn0031831,FBgn0031941,FBgn0032522,FBgn0032626,FBgn0032632,FBgn0032650,FBgn0032677,FBg…	GO:0006793	113
organelle organization	0.0100676	FBgn0000146,FBgn0000147,FBgn0000346,FBgn0002673,FBgn0002715,FBgn0002842,FBgn0002873,FBgn0003009,FBgn0003187,FBgn0003254,FBgn0003302,FBgn0003483,FBgn0003889,FBgn0003950,FBgn0004172,FBgn0004173,FBgn0004174,FBgn0004175,FBgn0004372,FBgn0004581,FBgn0005616,FBgn0011244,FBgn0011569,FBgn0013300,FBgn0013301,FBgn0014342,FBgn0016034,FBgn0019660,FBgn0019661,FBgn0020371,FBgn0023090,FBgn0026257,FBgn0027494,FBg…	GO:0006996	185
nucleoside diphosphate metabolic process	0.0103682	FBgn0011270,FBgn0028997,FBgn0031451,FBgn0031462,FBgn0034173,FBgn0036723,FBgn0037115,FBgn0038258,FBgn0038952,FBgn0039425,FBgn0042710,FBgn0042711	GO:0009132	12
motile cilium assembly	0.0117766	FBgn0023090,FBgn0034827,FBgn0038607,FBgn0051803,FBgn0266709	GO:0044458	5
proteolysis involved in cellular protein catabolic process	0.0125004	FBgn0017456,FBgn0017556,FBgn0026174,FBgn0026175,FBgn0026176,FBgn0029745,FBgn0029812,FBgn0030370,FBgn0030429,FBgn0030918,FBgn0031301,FBgn0031442,FBgn0031443,FBgn0032047,FBgn0032492,FBgn0032878,FBgn0034842,FBgn0034863,FBgn0034937,FBgn0035461,FBgn0035584,FBgn0036082,FBgn0036224,FBgn0036465,FBgn0036703,FBgn0037037,FBgn0037296,FBgn0037325,FBgn0037742,FBgn0037987,FBgn0038125,FBgn0038202,FBgn0038296,FBg…	GO:0051603	48
mitochondrial ATP synthesis coupled electron transport	0.0125222	FBgn0030975,FBgn0031831,FBgn0033020,FBgn0033274,FBgn0033885,FBgn0034007,FBgn0034251,FBgn0036222,FBgn0036706,FBgn0036830,FBgn0037172,FBgn0037579,FBgn0037860,FBgn0039331,FBgn0039576,FBgn0039651,FBgn0039669,FBgn0050354,FBgn0086907	GO:0042775	19
purine nucleoside diphosphate metabolic process	0.0125967	FBgn0011270,FBgn0031451,FBgn0031462,FBgn0034173,FBgn0036723,FBgn0037115,FBgn0038258,FBgn0038952,FBgn0039425,FBgn0042710,FBgn0042711	GO:0009135	11
purine ribonucleoside diphosphate metabolic process	0.0125967	FBgn0011270,FBgn0031451,FBgn0031462,FBgn0034173,FBgn0036723,FBgn0037115,FBgn0038258,FBgn0038952,FBgn0039425,FBgn0042710,FBgn0042711	GO:0009179	11
ribonucleoside diphosphate metabolic process	0.0125967	FBgn0011270,FBgn0031451,FBgn0031462,FBgn0034173,FBgn0036723,FBgn0037115,FBgn0038258,FBgn0038952,FBgn0039425,FBgn0042710,FBgn0042711	GO:0009185	11
ADP metabolic process	0.0125967	FBgn0011270,FBgn0031451,FBgn0031462,FBgn0034173,FBgn0036723,FBgn0037115,FBgn0038258,FBgn0038952,FBgn0039425,FBgn0042710,FBgn0042711	GO:0046031	11
cellular macromolecule catabolic process	0.0132541	FBgn0000146,FBgn0003483,FBgn0011206,FBgn0017456,FBgn0017556,FBgn0026174,FBgn0026175,FBgn0026176,FBgn0028852,FBgn0029745,FBgn0029812,FBgn0030370,FBgn0030429,FBgn0030918,FBgn0031301,FBgn0031442,FBgn0031443,FBgn0032047,FBgn0032089,FBgn0032492,FBgn0032878,FBgn0034842,FBgn0034863,FBgn0034937,FBgn0035461,FBgn0035584,FBgn0035924,FBgn0036082,FBgn0036224,FBgn0036465,FBgn0036703,FBgn0037037,FBgn0037296,FBg…	GO:0044265	61
nucleotide metabolic process	0.0149538	FBgn0011270,FBgn0028997,FBgn0029722,FBgn0031451,FBgn0031462,FBgn0031831,FBgn0031941,FBgn0032522,FBgn0033885,FBgn0034173,FBgn0034800,FBgn0035585,FBgn0036345,FBgn0036568,FBgn0036723,FBgn0037115,FBgn0037995,FBgn0038258,FBgn0038708,FBgn0038952,FBgn0039425,FBgn0039651,FBgn0039855,FBgn0040506,FBgn0040508,FBgn0040509,FBgn0040510,FBgn0042710,FBgn0042711,FBgn0050103,FBgn0051477,FBgn0052305,FBgn0285943	GO:0009117	33
protein transmembrane import into intracellular organelle	0.0151536	FBgn0011244,FBgn0020371,FBgn0031164,FBgn0031728,FBgn0032525,FBgn0032971,FBgn0033074,FBgn0037307,FBgn0037310,FBgn0037828,FBgn0038018,FBgn0038355,FBgn0265265	GO:0044743	13
cellular protein catabolic process	0.0174235	FBgn0017456,FBgn0017556,FBgn0026174,FBgn0026175,FBgn0026176,FBgn0029745,FBgn0029812,FBgn0030370,FBgn0030429,FBgn0030918,FBgn0031301,FBgn0031442,FBgn0031443,FBgn0032047,FBgn0032492,FBgn0032878,FBgn0034842,FBgn0034863,FBgn0034937,FBgn0035461,FBgn0035584,FBgn0036082,FBgn0036224,FBgn0036465,FBgn0036703,FBgn0037037,FBgn0037296,FBgn0037325,FBgn0037742,FBgn0037987,FBgn0038125,FBgn0038202,FBgn0038296,FBg…	GO:0044257	48
cilium movement involved in cell motility	0.0198735	FBgn0028902,FBgn0032291,FBgn0034816,FBgn0035638,FBgn0051320,FBgn0051803	GO:0060294	6
respiratory electron transport chain	0.0198964	FBgn0030975,FBgn0031831,FBgn0033020,FBgn0033274,FBgn0033885,FBgn0034007,FBgn0034251,FBgn0036222,FBgn0036706,FBgn0036830,FBgn0037172,FBgn0037579,FBgn0037860,FBgn0037970,FBgn0039331,FBgn0039576,FBgn0039651,FBgn0039669,FBgn0050354,FBgn0086907	GO:0022904	20
protein import	0.0205888	FBgn0011244,FBgn0020371,FBgn0031164,FBgn0031728,FBgn0032525,FBgn0032680,FBgn0032971,FBgn0033074,FBgn0035657,FBgn0035693,FBgn0036497,FBgn0037307,FBgn0037310,FBgn0037828,FBgn0037924,FBgn0038018,FBgn0038355,FBgn0042178,FBgn0260933,FBgn0265265,FBgn0267727	GO:0017038	21
nucleoside phosphate metabolic process	0.0209492	FBgn0011270,FBgn0028997,FBgn0029722,FBgn0031451,FBgn0031462,FBgn0031831,FBgn0031941,FBgn0032522,FBgn0033885,FBgn0034173,FBgn0034800,FBgn0035585,FBgn0036345,FBgn0036568,FBgn0036723,FBgn0037115,FBgn0037995,FBgn0038258,FBgn0038708,FBgn0038952,FBgn0039425,FBgn0039651,FBgn0039855,FBgn0040506,FBgn0040508,FBgn0040509,FBgn0040510,FBgn0042710,FBgn0042711,FBgn0050103,FBgn0051477,FBgn0052305,FBgn0285943	GO:0006753	33
proteasomal ubiquitin-independent protein catabolic process	0.0214283	FBgn0017556,FBgn0029812,FBgn0031442,FBgn0031443,FBgn0032492,FBgn0034842,FBgn0037296,FBgn0051742,FBgn0261395,FBgn0265606	GO:0010499	10
ATP synthesis coupled electron transport	0.0270759	FBgn0030975,FBgn0031831,FBgn0033020,FBgn0033274,FBgn0033885,FBgn0034007,FBgn0034251,FBgn0036222,FBgn0036706,FBgn0036830,FBgn0037172,FBgn0037579,FBgn0037860,FBgn0039331,FBgn0039576,FBgn0039651,FBgn0039669,FBgn0050354,FBgn0086907	GO:0042773	19
oxidative phosphorylation	0.0288663	FBgn0030975,FBgn0031451,FBgn0031831,FBgn0033020,FBgn0033274,FBgn0033885,FBgn0034007,FBgn0034251,FBgn0036222,FBgn0036568,FBgn0036706,FBgn0036830,FBgn0037172,FBgn0037579,FBgn0037860,FBgn0039331,FBgn0039576,FBgn0039651,FBgn0039669,FBgn0050354,FBgn0086907	GO:0006119	21
proteasomal protein catabolic process	0.0288731	FBgn0017556,FBgn0026174,FBgn0026175,FBgn0026176,FBgn0029812,FBgn0030918,FBgn0031301,FBgn0031442,FBgn0031443,FBgn0032047,FBgn0032492,FBgn0032878,FBgn0034842,FBgn0034863,FBgn0034937,FBgn0035461,FBgn0036082,FBgn0036224,FBgn0036465,FBgn0036703,FBgn0037296,FBgn0037325,FBgn0037742,FBgn0038125,FBgn0038202,FBgn0038445,FBgn0039147,FBgn0040291,FBgn0050156,FBgn0051742,FBgn0052847,FBgn0259729,FBgn0259794,FBg…	GO:0010498	37
electron transport chain	0.0338133	FBgn0030975,FBgn0031831,FBgn0033020,FBgn0033274,FBgn0033885,FBgn0034007,FBgn0034251,FBgn0036222,FBgn0036706,FBgn0036830,FBgn0037172,FBgn0037579,FBgn0037860,FBgn0037970,FBgn0039331,FBgn0039576,FBgn0039651,FBgn0039669,FBgn0050354,FBgn0086907	GO:0022900	20
protein dephosphorylation	0.0466595	FBgn0001281,FBgn0002673,FBgn0003132,FBgn0003140,FBgn0005778,FBgn0025573,FBgn0025821,FBgn0029949,FBgn0032626,FBgn0032632,FBgn0032971,FBgn0033322,FBgn0034713,FBgn0035143,FBgn0035426,FBgn0036212,FBgn0038655,FBgn0039421,FBgn0039694,FBgn0040963,FBgn0041102,FBgn0052568,FBgn0069938,FBgn0261624	GO:0006470	24
pyruvate metabolic process	0.0485402	FBgn0011270,FBgn0029722,FBgn0031451,FBgn0031462,FBgn0034127,FBgn0034173,FBgn0036723,FBgn0037115,FBgn0038258,FBgn0038952,FBgn0039425,FBgn0042710,FBgn0042711	GO:0006090	13
protein import into mitochondrial matrix	0.0487228	FBgn0020371,FBgn0031164,FBgn0032971,FBgn0033074,FBgn0037307,FBgn0037310,FBgn0037828,FBgn0038018,FBgn0038355,FBgn0265265	GO:0030150	10
proteasome-mediated ubiquitin-dependent protein catabolic process	0.0487489	FBgn0017556,FBgn0026174,FBgn0026175,FBgn0026176,FBgn0029812,FBgn0030918,FBgn0031301,FBgn0031442,FBgn0031443,FBgn0032047,FBgn0032492,FBgn0032878,FBgn0034842,FBgn0034863,FBgn0034937,FBgn0035461,FBgn0036082,FBgn0036224,FBgn0036465,FBgn0036703,FBgn0037296,FBgn0037325,FBgn0037742,FBgn0038202,FBgn0038445,FBgn0039147,FBgn0040291,FBgn0050156,FBgn0051742,FBgn0259729,FBgn0259794,FBgn0261395,FBgn0262535,FBg…	GO:0043161	35
Pathway enrichment of 1476 downegulated genes at T2 in S0W0 vs. S+W0 comparison. Number of Genes in this list not analysed in this widget: 1192
Pathway	Pvalue	Gene_id	Number of genes
Oxidative phosphorylation	5.83578e-07	FBgn0028667,FBgn0028668,FBgn0028669,FBgn0030975,FBgn0031831,FBgn0031941,FBgn0032294,FBgn0032464,FBgn0033020,FBgn0033706,FBgn0034007,FBgn0034251,FBgn0036222,FBgn0036568,FBgn0036706,FBgn0036830,FBgn0037172,FBgn0037402,FBgn0037579,FBgn0037860,FBgn0039331,FBgn0039576,FBgn0039651,FBgn0039669,FBgn0050354,FBgn0051477,FBgn0051644	27
Glycolysis / Gluconeogenesis	3.75922e-05	FBgn0011270,FBgn0029722,FBgn0031451,FBgn0031462,FBgn0031463,FBgn0032372,FBgn0034173,FBgn0036723,FBgn0037115,FBgn0038258,FBgn0038952,FBgn0039425,FBgn0042710,FBgn0042711,FBgn0052445	15
Glycolysis	6.30645e-05	FBgn0011270,FBgn0031451,FBgn0031462,FBgn0033969,FBgn0036723,FBgn0037115,FBgn0038258,FBgn0038952,FBgn0039425,FBgn0042710,FBgn0042711	11
Citrate cycle TCA cycle	0.000390723	FBgn0029722,FBgn0029890,FBgn0030975,FBgn0035005,FBgn0036162,FBgn0036222,FBgn0036327,FBgn0036328,FBgn0037860,FBgn0037862,FBgn0037988,FBgn0038708,FBgn0051874	13
Glucose metabolism	0.00125768	FBgn0011270,FBgn0031451,FBgn0031462,FBgn0031463,FBgn0033969,FBgn0036723,FBgn0037115,FBgn0038258,FBgn0038952,FBgn0039425,FBgn0042710,FBgn0042711	12
Metabolic pathways	0.00178389	FBgn0011270,FBgn0015574,FBgn0028667,FBgn0028668,FBgn0028669,FBgn0028997,FBgn0029722,FBgn0029890,FBgn0030661,FBgn0030975,FBgn0031451,FBgn0031462,FBgn0031463,FBgn0031831,FBgn0031941,FBgn0032003,FBgn0032061,FBgn0032271,FBgn0032294,FBgn0032457,FBgn0032464,FBgn0032522,FBgn0033020,FBgn0033673,FBgn0033706,FBgn0033952,FBgn0033969,FBgn0033983,FBgn0034007,FBgn0034127,FBgn0034132,FBgn0034173,FBgn0034251,FBg…	78
Proteasome	0.00267133	FBgn0017556,FBgn0029812,FBgn0031442,FBgn0031443,FBgn0032492,FBgn0034842,FBgn0036224,FBgn0036465,FBgn0037296,FBgn0037742,FBgn0051742,FBgn0261395,FBgn0265606	13
Hedgehog 'off' state	0.0310512	FBgn0000274,FBgn0015721,FBgn0017556,FBgn0029812,FBgn0034842,FBgn0037296,FBgn0039796,FBgn0040506,FBgn0040508,FBgn0040509,FBgn0040510,FBgn0051742,FBgn0052305,FBgn0260933,FBgn0265102,FBgn0265606	16

## Sheet: DE S–W– vs. S–Lh
Diferentially upregulated genes in S–W– vs. S–Lh comparison. Time 2, 72 hours post wasp attack, log2 FC is reported in tables.
Gene_id	log2FC	logCPM	F	PValue	FDR	Secondary_identifier	Gene_symbol	Gene_name	cpm (S–W–_1)	cpm (S–W–_2)	cpm (S–W–_3)	cpm (S–W–_4)	cpm (S–Lh_1)	cpm (S–Lh_2)	cpm (S–Lh_3)
FBgn0267111	3.2522	3.37648	159.285	2.77609e-06	0.0152727	CR45551	lncRNA:CR45551	long non-coding RNA:CR45551	2.53939	1.57542	3.11879	2.08317	19.0034	25.7008	14.8878
FBgn0037684	1.67683	5.07876	139.998	4.39232e-06	0.0152727	CG8129	Srr	Serine racemase	18.7233	15.3457	19.0185	19.968	53.9696	44.9064	56.1322
FBgn0040319	1.29342	6.32804	110.848	1.00026e-05	0.0152727	CG2259	Gclc	Glutamate-cysteine ligase catalytic subunit	46.7703	52.3389	55.7712	53.3496	131.036	102.355	106.422
FBgn0037280	1.934	1.72991	103.147	1.28661e-05	0.0152727	CG1126	BBS5	Bardet-Biedl syndrome 5	1.25075	1.57542	1.46766	1.87994	5.43789	5.48732	4.80391
FBgn0046114	1.47964	6.35868	101.31	1.36983e-05	0.0152727	CG4919	Gclm	Glutamate-cysteine ligase modifier subunit	42.0327	42.8864	59.1346	51.0124	120.218	123.465	118.67
FBgn0001325	1.33317	5.00081	93.5297	1.80851e-05	0.0152727	CG3340	Kr	Kruppel	16.6387	23.9814	21.8927	18.9518	48.5902	44.7384	43.1919
FBgn0052170	1.1871	3.33648	86.5977	2.36047e-05	0.0152727	CG32170	CG32170		5.87472	7.81874	6.42103	7.16409	13.2731	14.1662	13.8058
FBgn0033708	1.52953	4.92474	83.6046	2.6646e-05	0.0152727	CG8850	CG8850		23.1957	15.1707	16.6947	15.5476	47.7716	39.6991	47.6496
FBgn0035859	1.74821	1.19903	80.975	2.97398e-05	0.0152727	CG13678	CG13678		1.09914	1.16698	1.0396	1.32104	4.09304	3.1916	3.11605
FBgn0051781	1.01285	4.72194	79.3151	3.19298e-05	0.0152727	CR31781	lncRNA:CR31781	long non-coding RNA:CR31781	18.1927	19.1384	20.0581	19.7139	40.8134	32.196	30.6844
FBgn0026077	1.9017	6.79037	78.6148	3.2915e-05	0.0152727	CG10287	Gasp	Gasp	36.4233	55.1396	69.7752	52.5367	192.724	172.067	168.137
FBgn0010263	1.22601	6.91382	76.8836	3.55215e-05	0.0152727	CG3151	Rbp9	RNA-binding protein 9	74.1731	69.5518	89.3441	88.8144	158.517	165.235	176.706
FBgn0035186	1.24705	2.94396	76.4013	3.6294e-05	0.0152727	CG13912	CG13912		4.51027	5.07635	4.5253	6.04629	10.7004	10.8067	10.3436
FBgn0030065	0.751376	5.661	73.9638	4.05416e-05	0.0152727	CG12075	CG12075		40.2513	42.3029	39.7492	42.2224	58.1211	62.6562	63.1433
FBgn0029690	1.73126	3.54407	73.4773	4.14637e-05	0.0152727	CG6414	CG6414		4.24496	5.89323	7.15486	7.16409	19.9389	16.8539	17.2248
FBgn0083972	1.30124	5.00634	71.7209	4.50228e-05	0.0152727	CG34136	CG34136		21.3764	23.748	17.7954	20.1204	47.7131	36.8434	50.8089
FBgn0033387	1.8582	2.57394	71.5735	4.5339e-05	0.0152727	CG8008	CG8008		2.46359	3.38423	3.11879	2.69288	8.47843	7.61505	11.7285
FBgn0032010	1.22087	5.40356	71.2043	4.61431e-05	0.0152727	CG8086	CG8086		22.9683	27.1322	32.7778	30.2314	59.466	55.8811	59.9839
FBgn0034784	0.916094	4.89415	70.4053	4.7946e-05	0.0152727	CG9826	CG9826		26.8721	21.1223	22.443	20.1204	38.0652	37.5153	37.8687
FBgn0027654	0.734765	4.81017	69.9834	4.89341e-05	0.0152727	CG2239	jdp	jdp	23.9916	20.8305	24.2776	22.5593	34.323	34.6597	32.5021
FBgn0030607	0.990068	3.22348	69.3796	5.03938e-05	0.0152727	CG5560	dob	doppelganger von brummer	6.63275	7.1769	7.09371	6.50357	13.3316	13.1024	9.91077
FBgn0032156	1.17195	6.46171	69.0071	5.13221e-05	0.0152727	CG13124	CG13124		50.2952	58.057	67.8795	64.6292	122.089	112.21	126.416
FBgn0031069	1.11516	6.0486	68.2078	5.3388e-05	0.0152727	CG12703	Pmp70	Peroxisomal Membrane Protein 70 kDa	40.4029	42.4196	49.656	52.8415	88.8774	84.7175	93.2651
FBgn0050118	1.19368	5.10295	67.4171	5.5537e-05	0.0152727	CG30118	Ttd14	TRPL translocation defect 14	20.4289	24.0397	23.0546	25.4554	47.4792	40.147	53.2758
FBgn0033458	2.30439	4.22376	66.1302	5.92745e-05	0.0152727	CG18446	CG18446		4.54817	5.83488	9.78443	8.94241	35.9602	34.8837	25.3612
FBgn0038874	1.51687	3.05387	63.9874	6.62372e-05	0.0152727	CG5911	ETHR	ETHR	4.20706	3.96772	6.35988	4.72525	13.0977	13.2144	10.4734
FBgn0038391	1.03014	4.48194	63.5924	6.76322e-05	0.0152727	CG10278	GATAe	GATAe	14.213	14.8206	18.7739	16.9194	30.7562	28.0525	29.1264
FBgn0261446	1.19693	5.81208	63.3624	6.84615e-05	0.0152727	CG13377	CG13377		35.2862	30.6331	39.6881	46.1347	79.0541	80.966	72.0154
FBgn0039778	1.61719	8.26525	63.3209	6.86123e-05	0.0152727	CG18030	Jon99Fi	Jonah 99Fi	137.127	135.486	207.858	204.05	509.524	467.486	425.947
FBgn0025620	1.85758	7.40655	63.1255	6.93294e-05	0.0152727	CG13360	CG13360		70.7619	63.8919	104.938	95.572	345.335	253.649	214.358
FBgn0010223	1.19744	4.22805	62.892	7.01984e-05	0.0152727	CG12232	Galphaf	G protein alpha f subunit	10.9156	11.2613	14.432	13.8709	23.9735	24.8609	28.0012
FBgn0015766	1.35215	9.08758	62.7233	7.08351e-05	0.0152727	CG10596	Msr-110	Msr-110	271.185	312.224	392.906	395.498	761.071	786.366	785.504
FBgn0031548	1.26729	4.26654	62.5239	7.15969e-05	0.0152727	CG8852	CG8852		10.1197	11.8448	12.9032	15.3952	27.8911	25.0849	27.4818
FBgn0037503	1.94226	2.08262	60.7288	7.8947e-05	0.0152727	CG14598	CG14598		2.19828	1.45872	1.58997	2.59127	7.60135	5.48732	7.05439
FBgn0044812	2.91926	0.593471	60.706	7.9046e-05	0.0152727	CG31508	TotC	Turandot C	0.416916	0.175046	0.672679	0.304855	2.22193	2.85565	2.85638
FBgn0027341	0.963131	8.11344	60.1715	8.1422e-05	0.0152727	CG12449	Gfat1	Glutamine:fructose-6-phosphate aminotransferase 1	179.425	228.377	214.768	205.675	375.448	338.478	359.384
FBgn0053120	0.956309	5.66611	58.6469	8.87156e-05	0.0152727	CG33120	CG33120		38.811	33.0838	44.1522	36.0237	65.1962	62.6002	68.1636
FBgn0036769	0.839977	4.51905	57.5961	9.42302e-05	0.0152727	CG5492	Tsp74F	Tetraspanin 74F	16.525	16.5127	18.7739	19.968	28.6513	31.0202	26.0104
FBgn0053080	1.3303	6.22201	57.1035	9.69652e-05	0.0152727	CG33080	CG33080		37.5982	41.486	51.1236	59.7007	103.086	112.042	103.306
FBgn0026787	0.62452	5.36618	57.0697	9.71567e-05	0.0152727	CG12178	Nhe1	Na[+]/H[+] hydrogen exchanger 1	36.4612	32.3836	36.0189	35.7696	48.5902	49.7218	45.9617
FBgn0033820	1.40987	4.84671	56.6907	9.9335e-05	0.0152727	CG4716	CG4716		16.9419	18.3799	21.7092	13.6677	51.1045	41.8828	32.4588
FBgn0266742	0.93581	3.60636	55.4221	0.000107094	0.0152727	CR45215	lncRNA:CR45215	long non-coding RNA:CR45215	8.60362	10.0943	9.60097	8.3327	17.3077	13.6623	15.537
FBgn0259140	1.36866	5.9975	55.1894	0.0001086	0.0152727	CG42255	CG42255		27.8954	40.9609	45.7422	45.1693	96.4202	95.5241	83.4409
FBgn0029723	1.17713	3.01792	55.0218	0.000109701	0.0152727	CG6986	Proc-R	Proctolin receptor	5.19249	4.6679	5.87066	6.14791	10.5834	10.0228	12.2045
FBgn0035398	1.44657	7.39543	54.7928	0.000111229	0.0152727	CG1869	Cht7	Chitinase 7	69.3975	112.088	118.269	106.75	263.65	240.658	234.353
FBgn0030608	0.811705	7.50955	54.7121	0.000111774	0.0152727	CG9057	Lsd-2	Lipid storage droplet-2	159.489	131.168	152.392	136.626	244.354	228.564	204.491
FBgn0086358	0.651439	5.31035	54.6258	0.00011236	0.0152727	CG7417	Tab2	TAK1-associated binding protein 2	35.9684	32.3836	34.062	31.6033	46.3682	45.2984	48.0391
FBgn0038877	0.627447	6.37904	54.3262	0.000114427	0.0152727	CG3308	CG3308		70.3071	67.3345	72.8328	73.2668	98.8176	102.187	90.8848
FBgn0036765	0.936866	4.52869	54.1563	0.00011562	0.0152727	CG7408	CG7408		16.8282	14.6455	18.6516	19.3583	28.2419	29.6763	30.5113
FBgn0032280	2.47003	9.06962	54.0671	0.000116253	0.0152727	CG17105	CG17105		173.058	93.8249	236.11	261.667	1017.12	905.072	907.636
FBgn0041342	1.0018	6.12789	53.9584	0.00011703	0.0152727	CG1049	Pcyt1	Phosphocholine cytidylyltransferase 1	41.3125	56.0732	51.4906	56.6522	94.2568	87.5171	91.9235
FBgn0260653	1.06499	7.39813	53.9524	0.000117072	0.0152727	CG32209	serp	serpentine	95.5874	130.76	127.87	128.75	229.736	215.741	226.649
FBgn0001083	1.05482	5.6773	52.5973	0.000127342	0.0152727	CG1500	fw	furrowed	30.8517	32.5586	40.4831	42.9845	69.1723	71.5591	62.8403
FBgn0038237	1.852	4.24239	52.4945	0.000128167	0.0152727	CG8279	Pde6	Phosphodiesterase 6	5.4199	9.91929	11.7413	10.3651	30.3469	27.7166	31.6366
FBgn0263776	1.05969	4.43573	52.304	0.000129713	0.0152727	CG43693	CG43693		12.4317	18.4966	15.4105	15.6492	29.8207	26.5967	29.3428
FBgn0030679	0.81613	5.5365	51.8698	0.000133328	0.0152727	CG8206	CG8206		40.1755	34.134	33.8786	38.9706	52.04	58.4567	61.3689
FBgn0033667	1.75981	5.8756	51.7489	0.000134357	0.0152727	CG13183	reb	rebuf	24.4843	21.0639	42.073	34.0421	101.04	91.3247	82.9648
FBgn0004516	1.69827	2.86135	51.5694	0.000135904	0.0152727	CG14994	Gad1	Glutamic acid decarboxylase 1	2.53939	3.73432	4.21953	4.92849	11.7529	9.85478	11.5986
FBgn0005659	1.27101	4.16014	51.1391	0.000139705	0.0152727	CG5583	Ets98B	Ets at 98B	9.17214	14.3538	12.414	10.7715	24.2074	22.4532	27.9146
FBgn0259143	0.83971	5.6289	51.0648	0.000140375	0.0152727	CG42258	CG42258		33.1258	38.1601	41.4615	42.4764	65.547	60.8085	58.6856
FBgn0034417	0.896837	3.68721	51.0347	0.000140647	0.0152727	CG15117	CG15117		8.86893	11.0279	9.96789	9.50131	16.1967	14.7822	17.5711
FBgn0040382	0.707032	5.29512	50.9408	0.000141502	0.0152727	CG5273	CG5273		30.5864	32.1502	32.5944	34.3978	49.2918	51.7936	40.249
FBgn0035777	1.99499	1.78545	50.4253	0.000146313	0.0152727	CG8563	CG8563		1.32655	1.45872	1.22305	2.18479	5.08706	4.42345	6.838
FBgn0036428	1.24704	7.00266	50.1821	0.000148655	0.0152727	CG9238	Gbs-70E	Glycogen binding subunit 70E	63.9776	95.9838	102.308	77.0267	187.987	177.274	171.08
FBgn0034025	0.824073	6.25833	49.8989	0.000151442	0.0152727	CG8182	Pgant1	Polypeptide N-Acetylgalactosaminyltransferase 1	54.7675	57.9987	60.9081	68.1351	105.133	90.0928	89.8894
FBgn0038348	2.53479	4.63345	49.8446	0.000151984	0.0152727	CG18519	AOX2	Aldehyde oxidase 2	4.20706	6.76846	11.619	11.4321	47.7131	36.7314	46.6109
FBgn0032779	1.33144	4.64819	49.7275	0.000153162	0.0152727	CG16771	Alp12	Alkaline phosphatase 12	12.4696	14.7039	16.8781	19.6123	35.7848	30.7962	39.7296
FBgn0036713	0.770661	3.18936	49.5114	0.000155365	0.0152727	CG6456	Mip	Myoinhibiting peptide precursor	7.27707	6.53506	7.64408	7.72299	11.4605	11.0306	10.6465
FBgn0033483	0.761793	5.89047	49.4971	0.000155511	0.0152727	CG12919	egr	eiger	48.2864	44.1117	51.3071	48.3703	66.9504	71.8951	77.2953
FBgn0025680	1.14666	3.37343	49.3441	0.000157098	0.0152727	CG3772	cry	cryptochrome	6.40534	8.34388	5.8095	7.92623	16.4891	13.4383	12.118
FBgn0032613	1.52537	1.39411	48.7763	0.000163167	0.0152727	CG13283	Nepl9	Neprilysin-like 9	1.32655	1.16698	1.65112	1.77832	3.68373	3.52756	4.11145
FBgn0038151	1.39577	4.52957	48.6377	0.000164692	0.0152727	CG17044	yellow-e2	yellow-e2	13.1897	10.4444	14.9213	18.3421	37.1297	29.3964	33.1946
FBgn0038866	1.53433	4.64347	48.4919	0.000166318	0.0152727	CG5810	CG5810		9.28585	13.9454	17.2451	17.2751	37.3636	37.6273	36.4405
FBgn0035781	1.17688	8.76832	48.4046	0.000167301	0.0152727	CG8560	CG8560		278.992	235.963	334.322	340.269	644.77	540.613	604.297
FBgn0035358	0.661133	4.11101	48.0806	0.000171015	0.0152727	CG14949	CG14949		16.6387	13.887	13.9428	13.5152	21.5177	20.1575	19.3022
FBgn0005278	1.27472	8.26186	47.8403	0.000173836	0.0152727	CG2674	Sam-S	S-adenosylmethionine Synthetase	172.83	168.336	240.024	220.41	415.385	389.32	483.117
FBgn0266887	3.15126	2.56986	47.7643	0.000174741	0.0152727	CR45348	lncRNA:CR45348	long non-coding RNA:CR45348	0.416916	1.34202	1.95689	1.98156	10.7588	10.0228	12.3776
FBgn0039787	0.870137	4.53343	47.7405	0.000175025	0.0152727	CG9702	CG9702		15.4638	16.5127	19.8746	19.7648	28.7097	29.6763	28.7369
FBgn0011829	0.75454	3.55276	47.4889	0.00017807	0.0152903	CG14396	Ret	Ret oncogene	10.2334	8.57727	8.68368	10.3651	14.2672	15.2861	13.0268
FBgn0032685	2.13173	7.6321	46.798	0.000186782	0.0154504	CG10211	CG10211		45.8607	73.4028	106.956	112.949	364.163	344.973	286.936
FBgn0012051	0.609305	5.85039	46.7187	0.000187817	0.0154504	CG7563	CalpA	Calpain-A	48.9686	47.1458	51.9186	49.8946	68.2952	64.56	67.7741
FBgn0031089	1.13495	5.12275	46.5336	0.000190259	0.0154504	CG9572	CG9572		21.3385	20.1887	25.623	29.4185	42.3922	47.6501	50.8955
FBgn0027572	0.79634	6.87147	46.3496	0.000192729	0.0154504	CG5009	CG5009		85.5435	88.4568	93.8694	106.191	140.391	145.47	146.195
FBgn0000442	1.5078	3.448	45.9174	0.000198689	0.015668	CG3324	Pkg21D	Protein kinase, cGMP-dependent at 21D	5.00299	4.84295	8.43907	7.16409	18.1263	15.1741	14.9311
FBgn0036782	0.925754	6.4104	45.1832	0.00020936	0.01573	CG7320	CG7320		60.9455	54.4978	72.5271	69.9134	123.083	105.659	98.0257
FBgn0083956	1.99781	6.79687	45.0268	0.000211726	0.01573	CG34120	CG34120		28.5777	44.3451	65.7391	65.3406	207.458	175.258	162.511
FBgn0038919	0.964252	4.02473	44.6142	0.000218135	0.01573	CG17843	Qsox2	Quiescin sulfhydryl oxidase 2	13.9098	10.0943	11.4967	12.9055	23.2718	18.1977	21.293
FBgn0020545	1.1122	5.49994	44.5496	0.000219161	0.01573	CG3943	kraken	kraken	27.1374	28.6493	32.3498	38.6149	60.0507	53.9773	67.8174
FBgn0050154	1.02037	3.59567	44.395	0.00022164	0.01573	CG30154	CG30154		8.1488	8.16883	9.60097	9.14565	17.9509	12.7664	16.4891
FBgn0259175	0.986246	6.67112	44.1454	0.00022572	0.01573	CG42280	ome	omega	67.7298	68.8516	80.0488	84.8005	140.508	113.722	142.3
FBgn0260429	0.66292	4.9853	44.0713	0.000226948	0.01573	CG42524	CG42524		23.3852	27.774	28.3748	26.8272	37.3636	38.9712	35.748
FBgn0015034	1.62153	1.18251	43.8906	0.000229983	0.01573	CG2062	Cyp4e1	Cytochrome P450-4e1	0.871732	1.16698	1.58997	1.27023	3.7422	3.07962	3.15933
FBgn0029091	0.839551	3.85485	43.8881	0.000230025	0.01573	CG7464	Chs2	Chitin synthase 2	10.385	12.1365	10.2736	12.4482	19.822	15.958	18.0038
FBgn0038641	0.94868	2.57494	43.7676	0.000232076	0.01573	CG7708	CG7708		4.16916	3.85102	4.70876	4.92849	8.01066	7.55906	7.14095
FBgn0027375	0.649515	4.74537	43.4905	0.000236884	0.01573	CG4879	RecQ5	RecQ5 helicase	20.77	22.0558	23.8495	23.7787	32.9197	33.7078	28.0012
FBgn0051475	1.49372	3.87424	43.3155	0.000239985	0.01573	CG31475	CG31475		6.63275	6.30167	10.6406	10.8732	21.8685	22.2292	20.6005
FBgn0014417	0.612599	4.80378	43.2956	0.00024034	0.01573	CG13397	CG13397		24.4464	21.7641	25.8064	23.5246	33.3875	31.8041	31.9395
FBgn0033668	1.38952	5.65818	43.2169	0.000241755	0.01573	CG13188	exp	expansion	21.7554	28.0074	36.2024	38.9706	78.9956	68.9834	70.3275
FBgn0031182	0.962774	3.90098	43.2103	0.000241874	0.01573	CG1644	Cyp6t1	Cyp6t1	9.21004	10.0943	12.2917	12.8039	20.2313	18.5897	18.7829
FBgn0266005	0.954116	3.28335	43.1538	0.000242897	0.01573	CR44779	lncRNA:CR44779	long non-coding RNA:CR44779	6.36744	6.30167	7.94985	8.3327	12.0452	13.3263	11.9881
FBgn0030999	1.13857	7.46001	42.8151	0.000249142	0.0158448	CG7874	Mur18B	Mucin related 18B	115.524	105.436	106.039	161.471	249.558	239.65	227.342
FBgn0066101	0.828286	5.03024	42.7621	0.000250138	0.0158448	CG31094	LpR1	Lipophorin receptor 1	23.1578	24.4481	27.0906	28.1991	36.7789	40.427	44.0575
FBgn0265146	3.25694	3.95918	43.5806	0.00025439	0.0160265	CG44215	CG44215		2.46359	1.45872	5.07567	4.92849	21.927	21.6133	43.9709
FBgn0041181	1.2519	6.56299	42.4103	0.000256876	0.0160402	CG7068	Tep3	Thioester-containing protein 3	52.1902	49.0713	69.286	78.6017	129.866	127.272	137.842
FBgn0266579	0.590116	4.39971	42.2315	0.00026039	0.0160402	CG45110	tau	tau	16.6387	19.0801	19.1408	17.8848	25.026	24.5809	23.2405
FBgn0050147	0.651557	4.87749	42.1609	0.000261794	0.0160402	CG30147	Hil	Hillarin	24.4085	26.3153	27.0906	21.3906	35.4925	35.3316	32.8051
FBgn0261625	1.16139	5.82073	42.0948	0.000263118	0.0160402	CG42708	GLS	Glutaminase	29.8663	37.0515	44.3968	43.6959	69.5816	74.2468	86.3405
FBgn0031012	0.898224	4.39254	42.0611	0.000263796	0.0160402	CG8051	CG8051		18.1548	15.5791	14.6766	15.9033	26.0785	22.7892	30.4248
FBgn0050021	0.804858	3.85197	41.7791	0.000269557	0.0160402	CG30021	metro	menage a trois	10.6124	10.3277	12.9644	11.8385	17.4831	16.9659	18.6097
FBgn0039151	0.694641	6.66067	41.7774	0.000269593	0.0160402	CG13607	CG13607		87.7039	91.6076	83.4122	74.1305	136.064	117.305	109.321
FBgn0037720	0.718593	5.73012	41.4573	0.000276328	0.0160402	CG8312	CG8312		37.674	49.4798	45.4976	42.1208	65.2547	64.224	61.8016
FBgn0039527	1.33074	4.80999	41.4498	0.000276489	0.0160402	CG5639	CG5639		11.522	21.0056	19.2019	19.6123	42.8015	38.8032	37.8687
FBgn0033968	1.3446	6.02503	41.2801	0.000280148	0.0160894	CG10200	hui	hase und igel	33.7323	38.1018	46.4149	46.4396	100.045	68.7595	108.326
FBgn0086711	1.03324	3.38215	40.9116	0.000288311	0.0160894	CG4482	mol	moladietz	6.02632	6.88516	8.37792	8.73917	14.4426	12.9344	13.5029
FBgn0028496	1.02461	3.3645	40.842	0.000289887	0.0160894	CG30116	CG30116		5.79892	7.81874	8.92829	7.26571	12.9808	13.8303	13.4596
FBgn0030638	0.985859	3.26341	40.7077	0.000292956	0.0160894	CG11655	CG11655		5.68521	7.52699	7.64408	7.36733	14.2087	11.1426	11.815
FBgn0011576	1.38521	5.44646	40.6601	0.000294054	0.0160894	CG3466	Cyp4d2	Cytochrome P450-4d2	21.0732	20.3054	34.3066	32.3654	66.658	62.5442	59.2049
FBgn0038350	2.08501	0.691253	40.5562	0.000296471	0.0161347	CG18516	AOX4	Aldehyde oxidase 4	0.53062	0.875232	0.428069	0.863755	2.98207	1.84777	2.76982
FBgn0031649	1.47291	4.2052	40.2435	0.000303894	0.0164381	CG15624	hoe2	hoepel2	9.96807	7.46865	11.2521	15.0903	31.0486	24.8609	25.2313
FBgn0038412	1.02531	4.82003	40.1443	0.0003063	0.0164381	CG6898	Zip89B	Zinc/iron regulated transporter-related protein 89B	15.767	26.0236	20.3638	20.0188	38.2991	38.6912	34.3198
FBgn0033426	0.680116	4.11775	39.8761	0.000312922	0.0165828	CG1814	CG1814		13.3034	14.1204	15.7774	14.5822	20.1728	19.8215	21.4661
FBgn0261436	0.912712	4.77876	39.4112	0.000324839	0.0165828	CG18143	DhpD	Dihydropterin deaminase	19.0644	17.6797	21.4646	25.2521	34.6154	33.8758	36.0077
FBgn0031306	0.843648	3.65785	39.278	0.000328361	0.0165828	CG4577	CG4577		9.05844	8.69397	11.3744	10.2126	16.1967	14.5582	16.1429
FBgn0035770	1.26589	7.94208	39.1018	0.000333091	0.0165828	CG8588	pst	pastrel	139.212	139.395	162.299	203.897	329.08	293.292	405.562
FBgn0038790	1.42544	1.06711	38.9987	0.0003359	0.0165828	CG5097	MtnC	Metallothionein C	1.09914	1.16698	1.1619	1.47347	2.28041	3.30359	3.15933
FBgn0033598	1.73128	3.3467	38.9589	0.000336993	0.0165828	CG13224	Cpr47Eb	Cuticular protein 47Eb	3.79014	4.20111	5.74835	7.51975	13.507	14.2222	18.9992
FBgn0053169	1.06162	3.3184	38.9585	0.000337004	0.0165828	CG33169	CG33169		6.59485	5.71818	7.09371	8.94241	13.3901	12.4305	13.5462
FBgn0032940	0.821214	6.74654	38.8848	0.000339038	0.0165828	CG18362	Mondo	Mondo	68.7532	91.9577	90.506	88.4587	140.099	138.807	121.266
FBgn0036801	0.672246	5.22665	38.1667	0.000359703	0.0168115	CG6896	MYPT-75D	MYPT-75D	27.9712	34.0757	34.1843	29.1644	46.4852	42.9467	43.4083
FBgn0012034	1.4022	7.18517	38.0355	0.00036365	0.0168115	CG9390	AcCoAS	Acetyl Coenzyme A synthase	57.6859	114.13	84.1461	102.939	220.907	203.983	206.611
FBgn0025684	0.861186	4.66605	37.9597	0.000365955	0.0168115	CG15438	MFS18	Major Facilitator Superfamily Transporter 18	17.6621	18.2048	19.63	23.3214	34.9077	28.3325	31.9828
FBgn0266994	1.85399	1.81445	37.945	0.000366406	0.0168115	CR45445	asRNA:CR45445	antisense RNA:CR45445	1.32655	1.16698	2.50726	1.82913	4.61928	5.31934	6.36193
FBgn0262717	1.29777	5.78221	37.9422	0.000366492	0.0168115	CG43161	Skeletor	Skeletor	24.5222	38.2185	41.3392	38.056	85.369	64.0001	82.7484
FBgn0035244	0.899091	5.03297	37.9178	0.000367238	0.0168115	CG7955	ABCB7	ATP binding cassette subfamily B member	21.7933	23.923	28.3748	26.1159	41.9829	36.1715	45.7886
FBgn0034053	1.50303	1.85002	37.6106	0.000376817	0.0168706	CG8302	Cyp4aa1	Cyp4aa1	1.78137	1.75046	2.69072	2.08317	5.204	4.14349	6.18882
FBgn0032946	0.867409	5.44614	37.5284	0.000379432	0.0168706	CG8663	nrv3	nervana 3	29.0704	29.9329	39.8715	36.2777	54.7297	54.0893	55.2666
FBgn0086687	1.44871	8.95373	37.3787	0.00038426	0.0168706	CG5887	Desat1	Desaturase 1	217.895	249.616	368.445	358.611	814.573	602.821	754.3
FBgn0015569	1.8208	3.95457	37.232	0.000389061	0.0168706	CG1131	alpha-Est10	alpha-Esterase-10	5.4957	5.89323	10.7629	8.94241	26.7217	17.5258	28.4772
FBgn0015576	2.17314	4.57344	37.2119	0.000389726	0.0168706	CG1121	alpha-Est8	alpha-Esterase-8	6.97386	7.1769	8.92829	16.6654	53.0341	39.6991	27.8281
FBgn0033744	1.10222	3.89393	36.9001	0.000400218	0.0168706	CG12370	Dh44-R2	Diuretic hormone 44 receptor 2	8.073	8.98571	12.0471	12.5499	20.5237	19.3176	19.6917
FBgn0040606	2.15538	1.39973	36.8574	0.00040168	0.0168706	CG6503	CG6503		0.492718	1.05028	1.52882	1.32104	4.73623	4.0315	4.11145
FBgn0038366	1.18174	6.72982	36.7186	0.000406486	0.0168706	CG4576	CG4576		55.0328	61.9081	80.2935	91.2024	145.186	141.774	148.921
FBgn0035666	1.21516	9.51584	36.6418	0.000409178	0.0168706	CG6580	Jon65Aii	Jonah 65Aii	465.808	358.262	513.805	625.511	1107.05	931.836	997.569
FBgn0266252	2.72087	0.27507	36.6041	0.000410508	0.0168706	CR44947	lncRNA:CR44947	long non-coding RNA:CR44947	0.26531	0.233395	0.489221	0.406473	1.57874	1.28784	3.11605
FBgn0038645	1.25104	4.84868	36.5872	0.000411106	0.0168706	CG7714	CG7714		15.1985	14.9373	20.6696	24.9981	45.3158	38.4672	36.7001
FBgn0033928	1.22212	3.02274	36.5846	0.000411199	0.0168706	CG13941	Arc2	Arc2	4.62397	4.37616	6.11527	6.40195	9.64787	10.8067	12.8104
FBgn0032733	1.24488	5.4248	36.4597	0.000415651	0.0168706	CG15170	CG15170		24.1053	20.5388	33.8174	34.9567	65.2547	59.5206	54.7473
FBgn0031195	0.898062	3.54233	36.0058	0.000432359	0.0171839	CG17600	CG17600		7.65609	7.93544	9.84558	10.0602	13.9163	14.3342	15.6668
FBgn0051352	0.744644	5.18535	35.9681	0.000433786	0.0171839	CG31352	Unc-115a	Uncoordinated 115a	26.8342	26.6654	31.4936	33.3816	46.1928	41.3789	44.3604
FBgn0052687	1.28828	7.78859	35.9534	0.000434342	0.0171839	CG32687	CG32687		97.7098	134.552	170.127	170.871	326.741	293.292	313.25
FBgn0262951	2.49499	1.6902	35.7998	0.000440223	0.0172401	CR43270	lncRNA:CR43270	long non-coding RNA::CR43270	0.454817	1.10863	1.83458	1.1178	6.78275	5.99126	4.0249
FBgn0050104	0.962397	4.40224	35.5937	0.000448273	0.0173283	CG30104	NT5E-2	Ecto-5'-nucleotidase 2	12.9244	15.9876	17.3674	16.7162	23.7981	26.2607	31.2471
FBgn0052702	0.870075	7.11732	35.59	0.000448419	0.0173283	CG32702	Cubn	Cubilin	84.2169	120.899	110.625	115.083	173.135	187.745	163.896
FBgn0031417	1.13696	2.97751	35.5386	0.000450459	0.0173283	CG3597	CG3597		4.54817	6.59341	5.01452	5.5382	11.2266	8.45495	11.8583
FBgn0052695	0.662751	4.60826	35.3619	0.000457554	0.0173283	CG32695	CG32695		18.4959	21.8224	22.1984	19.3583	32.3935	28.1085	25.8372
FBgn0029843	1.28709	3.92097	35.2809	0.000460855	0.0173283	CG5905	Nep1	Neprilysin 1	7.50448	8.11048	10.7629	12.7531	19.5881	19.9895	23.8032
FBgn0034985	0.797027	5.86377	35.2354	0.00046272	0.0173283	CG3328	CG3328		37.7119	55.373	46.5372	46.3887	72.2713	73.0149	69.6783
FBgn0028563	0.897475	5.0551	34.9756	0.000473567	0.0173582	CG8714	sut1	sugar transporter 1	27.4785	24.2731	23.4826	26.7256	41.5736	34.4917	49.5106
FBgn0033919	0.659624	7.16023	34.8489	0.000478973	0.0173582	CG8547	CG8547		121.967	106.02	133.435	120.468	167.581	172.907	165.93
FBgn0028940	2.00299	7.07791	34.8472	0.000479049	0.0173582	CG8864	Cyp28a5	Cyp28a5	45.9744	38.977	75.0955	87.1377	184.537	186.233	285.898
FBgn0038629	2.04273	2.73992	34.7071	0.00048512	0.0174102	CG14304	CG14304		1.78137	1.86716	4.28069	3.96311	11.8113	10.0787	10.6898
FBgn0261258	0.858291	5.52796	34.5288	0.00049299	0.0174609	CG6014	rgn	regeneration	28.0849	37.9851	40.85	36.735	60.5185	54.9852	57.7335
FBgn0261113	0.995843	8.16487	34.5017	0.000494197	0.0174609	CG17836	Xrp1	Xrp1	166.463	217.758	233.603	227.879	336.974	365.187	417.507
FBgn0004580	1.01569	3.71838	34.3706	0.000500103	0.0174609	CG6702	Cbp53E	Calbindin 53E	7.9972	7.99378	10.7017	11.5337	18.5941	15.846	17.0084
FBgn0051133	0.735173	2.83839	34.2781	0.00050433	0.0174609	CG31133	Slimp	Seryl-tRNA synthetase-like insect mitochondrial protein	5.3062	5.89323	6.05411	5.89386	8.5369	8.063	8.95864
FBgn0034253	0.922759	6.8075	34.0686	0.000514061	0.0174609	CG10936	CG10936		65.0009	85.1309	95.0924	94.6574	139.222	155.269	135.245
FBgn0010350	0.596231	6.5556	34.024	0.000516163	0.0174609	CG7962	Cds	CDP-diacylglycerol synthase	84.558	73.7529	79.2539	86.9344	110.453	104.539	110.879
FBgn0033112	1.27781	3.20808	33.9786	0.000518315	0.0174609	CG9454	Spn42Db	Serpin 42Db	4.88928	4.9013	5.8095	8.28189	11.9867	12.3745	14.1088
FBgn0038349	0.944853	7.4423	33.963	0.000519057	0.0174609	CG6045	AOX3	Aldehyde oxidase 3	125.681	102.402	136.065	159.134	220.322	228.732	221.759
FBgn0037487	1.06186	6.32729	33.9159	0.000521303	0.0174609	CG14608	thw	thawb	62.1962	41.0776	70.6313	56.2457	100.572	115.29	104.041
FBgn0261509	0.81895	5.62908	33.771	0.0005283	0.0174609	CG14351	haf	hattifattener	30.738	44.0533	42.3788	39.4279	61.6879	66.6877	55.7859
FBgn0038761	1.07625	2.42488	33.7082	0.000531367	0.0174609	CG17190	CG17190		4.01755	2.85909	4.15838	4.01392	6.31497	7.05512	7.70357
FBgn0039856	1.98611	4.18709	33.6278	0.000535331	0.0174609	CG1774	CG1774		6.51904	6.47672	10.5794	10.0094	26.1954	18.4777	42.8024
FBgn0039486	1.74323	2.91636	33.6258	0.000535427	0.0174609	CG6074	CAH9	Carbonic anhydrase 9	2.53939	3.09249	4.58645	5.43658	13.2731	8.95889	12.5508
FBgn0039747	0.710604	3.51267	33.5738	0.00053801	0.0174609	CG9753	AdoR	Adenosine receptor	9.09634	10.6778	9.96789	7.7738	13.3316	14.3342	13.1134
FBgn0035187	1.86488	0.0517798	33.548	0.000539299	0.0174609	CG9122	Trh	Tryptophan hydroxylase	0.303211	0.46679	0.733832	0.406473	1.4618	1.56781	1.51475
FBgn0028482	1.10644	2.44353	33.4638	0.000543527	0.0174609	CG16857	bdl	borderless	4.20706	2.68404	3.73031	4.4204	7.36746	7.61505	6.66488
FBgn0030041	0.944814	7.53267	33.4459	0.000544431	0.0174609	CG12116	CG12116		111.165	145.814	168.598	131.748	263.475	224.308	226.866
FBgn0261341	1.15408	7.95948	33.307	0.000551517	0.0174609	CG8756	verm	vermiform	121.929	209.822	184.008	170.465	356.913	298.667	358.692
FBgn0053329	0.967906	2.82717	33.1674	0.000558754	0.0174609	CG33329	Sp212	Serine-peptidase 212	4.58607	4.49286	5.32028	6.50357	9.06315	9.01488	9.13176
FBgn0054043	0.743024	3.20433	33.1642	0.000558918	0.0174609	CG34043	CG34043		7.9593	7.0602	7.27717	7.51975	12.5715	9.46283	11.1226
FBgn0261675	1.09695	6.0295	33.1077	0.000561882	0.0174609	CG12092	Npc1b	Niemann-Pick type C-1b	38.5078	39.0353	44.1522	62.4444	91.6255	83.1497	87.5956
FBgn0035375	1.03207	5.88717	32.9769	0.000568826	0.0174609	CG2103	Pgant6	Polypeptide N-Acetylgalactosaminyltransferase 6	35.0967	36.7597	45.8034	53.8069	84.0242	70.1593	79.2429
FBgn0039209	0.690677	7.09164	32.9692	0.000569234	0.0174609	CG13624	REPTOR	Repressed by TOR	97.634	115.005	123.895	117.369	160.973	177.554	149.917
FBgn0051146	0.949079	3.56863	32.9685	0.000569272	0.0174609	CG31146	Nlg1	Neuroligin 1	6.93596	10.211	10.2125	8.12946	13.9163	16.182	15.3639
FBgn0032218	0.848374	5.43167	32.8965	0.000573145	0.0174609	CG5381	CG5381		32.5573	31.1583	33.9397	37.2939	58.2381	43.6186	59.2482
FBgn0035844	0.822371	7.69478	32.8445	0.000575959	0.0174609	CG13676	CG13676		137.506	151.415	182.052	183.827	262.305	275.654	234.786
FBgn0001941	0.894119	6.13637	32.5954	0.000589696	0.0174609	CG9078	ifc	infertile crescent	46.3155	48.0794	58.8289	62.6477	92.0933	79.2302	95.2559
FBgn0039249	0.887415	5.18281	32.5917	0.000589906	0.0174609	CG11168	CG11168		23.3094	24.5065	30.2706	33.534	47.2453	43.8426	46.3512
FBgn0039022	1.564	4.12369	32.4833	0.000596016	0.0174609	CG4725	Nepl13	Neprilysin-like 13	6.82225	7.4103	11.2521	14.1249	26.1954	23.2371	28.434
FBgn0015765	0.61676	4.59069	32.4609	0.000597289	0.0174609	CG5475	p38a	p38a MAP kinase	20.5805	18.8467	20.5473	22.2544	29.8792	25.4208	28.4772
FBgn0033782	1.65587	2.90151	32.3257	0.000605042	0.0174721	CG3850	sug	sugarbabe	3.18372	4.02607	6.29873	2.74369	13.6824	10.5267	9.82421
FBgn0039748	1.23784	0.722832	32.3123	0.000605823	0.0174721	CG15529	CG15529		0.985437	1.10863	1.10075	0.965374	2.22193	1.79178	2.46687
FBgn0010352	0.861758	8.32066	32.2847	0.000607422	0.0174721	CG11661	Nc73EF	Neural conserved at 73EF	210.315	267.646	276.41	241.597	404.567	357.18	439.06
FBgn0050277	0.644995	4.49792	32.1074	0.000617839	0.01768	CG30277	Oatp58Da	Organic anion transporting polypeptide 58Da	18.079	17.1545	18.9573	22.0512	26.02	27.6046	25.7507
FBgn0034420	0.7828	7.34102	31.8709	0.000632089	0.0176831	CG10737	CG10737		128.258	113.488	133.986	145.162	192.256	184.105	218.253
FBgn0029870	0.6095	6.9518	31.8228	0.000635042	0.0176831	CG3869	Marf	Mitochondrial assembly regulatory factor	106.276	94.4667	112.949	111.17	142.496	143.118	145.329
FBgn0036770	1.00532	6.12186	31.8175	0.000635369	0.0176831	CG5485	Prestin	Prestin	36.6886	54.4394	55.0374	58.024	88.7019	87.2932	96.4677
FBgn0001311	0.867611	7.40494	31.7853	0.000637351	0.0176831	CG2666	kkv	krotzkopf verkehrt	101.424	140.737	150.68	133.374	221.316	215.013	203.452
FBgn0035131	0.736014	5.2359	31.7082	0.000642137	0.0176831	CG17084	mthl9	methuselah-like 9	28.1986	27.0155	31.249	36.5318	45.9005	44.5705	45.8319
FBgn0266734	3.53942	2.41163	31.7019	0.000642532	0.0176831	CR45207	lncRNA:CR45207	long non-coding RNA:CR45207	0.151606	0.991929	1.10075	1.77832	8.01066	7.61505	14.6714
FBgn0085419	1.09794	1.16364	31.6823	0.000643756	0.0176831	CG34390	Rgk2	Rad, Gem/Kir family member 2	1.55396	1.40037	1.65112	1.47347	3.15748	2.4077	3.07277
FBgn0020372	1.51808	2.47143	31.672	0.0006444	0.0176831	CG11303	TM4SF	Transmembrane 4 superfamily	3.18372	2.74239	3.4857	3.3534	7.95218	5.26335	10.8629
FBgn0030763	1.64577	4.55172	31.6346	0.000646748	0.0176831	CG9782	CG9782		7.9972	9.5692	17.3674	16.3605	40.8134	35.2756	31.2471
FBgn0026570	1.07937	3.18919	31.5856	0.000649843	0.0176831	CG5704	CG5704		5.19249	6.53506	6.91025	7.11328	12.2791	9.6308	14.0655
FBgn0041337	1.74107	2.06263	31.5286	0.00065347	0.0177401	CG18559	Cyp309a2	Cyp309a2	2.19828	1.80881	1.40651	3.15017	8.59538	5.09537	5.53964
FBgn0035199	0.812603	4.03259	31.4573	0.000658033	0.0178222	CG9134	tfc	triforce	12.318	11.5531	12.5363	15.2936	21.8685	17.4698	20.9901
FBgn0031530	1.15929	5.22327	31.3189	0.00066702	0.0178791	CG3254	Pgant2	Polypeptide N-Acetylgalactosaminyltransferase 2	18.8749	22.6393	29.231	31.6541	54.4374	44.0105	53.6653
FBgn0035385	1.29594	2.92157	31.0612	0.000684159	0.0178791	CG2114	FMRFaR	FMRFamide Receptor	3.33532	4.55121	5.38144	6.14791	11.1681	9.07087	11.3822
FBgn0015623	1.24962	7.24306	31.0601	0.000684237	0.0178791	CG11567	Cpr	Cytochrome P450 reductase	76.8262	80.9881	120.838	120.875	205.47	186.513	239.243
FBgn0266637	2.65371	1.32977	31.0103	0.000687614	0.0178791	CR45144	asRNA:CR45144	antisense RNA:CR45144	0.227408	0.875232	1.40651	0.711328	3.85915	4.59143	4.6308
FBgn0030603	0.951042	5.78997	30.9566	0.000691277	0.0178791	CG5541	CG5541		33.2016	42.0111	42.3788	48.3195	70.6926	61.4244	80.5845
FBgn0031636	0.695681	3.82036	30.9544	0.000691431	0.0178791	CG12194	CG12194		11.6357	9.91929	11.6802	13.4136	16.1967	18.3657	15.7966
FBgn0035169	1.02262	5.9578	30.8295	0.00070006	0.0178791	CG13890	Dci	Dodecenoyl-CoA delta-isomerase	45.1027	34.7175	50.084	51.0632	77.4753	71.1672	94.9962
FBgn0036128	1.85095	1.05766	30.8227	0.00070053	0.0178791	CG11801	Elo68beta	Elongase 68beta	0.758028	0.583488	1.10075	1.52427	3.27443	3.69554	2.63999
FBgn0062978	1.93982	3.81471	30.7764	0.000703767	0.0178791	CG31808	CG31808		3.48693	5.07635	8.31676	9.65374	25.9031	18.7017	23.1107
FBgn0041607	1.02955	4.89841	30.7641	0.000704628	0.0178791	CG33486	AsnS	Asparagine synthetase	23.4989	20.6555	18.7127	23.7279	32.7443	34.4917	49.424
FBgn0032013	1.07777	1.86181	30.7254	0.000707355	0.0178791	CG7851	Scgalpha	Sarcoglycan alpha	2.12248	2.509	2.38495	3.09936	5.32095	4.25547	4.6308
FBgn0262028	0.777511	2.8117	30.7073	0.000708627	0.0178791	CR42839	lncRNA:CR42839	long non-coding RNA:CR42839	4.66187	6.18497	5.93181	5.58901	9.00468	8.34296	8.13635
FBgn0013771	1.8431	4.85161	30.6671	0.000711478	0.0178791	CG10246	Cyp6a9	Cytochrome P450-6a9	10.6503	7.81874	18.8962	19.8664	45.2573	41.9388	49.5538
FBgn0030798	1.30465	4.68212	30.6633	0.000711748	0.0178791	CG13003	CG13003		11.3704	13.5369	21.0365	19.968	33.0366	39.5871	35.9211
FBgn0035090	0.741402	7.45382	30.6251	0.000714471	0.0178791	CG2736	CG2736		162.029	115.414	144.198	151.31	213.481	228.228	196.138
FBgn0039970	0.802668	7.17437	30.6202	0.000714824	0.0178791	CG17508	CG17508		99.1122	100.943	128.849	131.037	182.842	180.018	171.859
FBgn0036627	0.67967	3.01306	30.6017	0.000716142	0.0178791	CG4680	Gagr	Gag-related	6.63275	6.00993	6.78795	7.26571	8.94621	9.6868	9.78093
FBgn0033524	2.42012	1.9045	30.5396	0.000720614	0.0178791	CG18377	Cyp49a1	Cyp49a1	0.682225	0.700186	1.77343	2.2356	6.49039	5.6553	6.96783
FBgn0052082	0.904806	5.41037	30.5212	0.000721941	0.0178791	CG32082	IRSp53	Insulin receptor substrate 53 kDa	24.0295	32.9087	37.9147	35.0075	55.0221	56.8329	50.2896
FBgn0011236	0.656593	3.74418	30.4803	0.000724913	0.0178791	CG5575	ken	ken and barbie	12.0147	10.7945	12.6586	9.50131	15.0273	16.9099	15.1907
FBgn0031836	1.26492	5.61928	30.3545	0.000734141	0.0179986	CG11050	CG11050		24.1053	29.1744	37.7924	37.6496	69.4647	53.2494	82.2291
FBgn0262579	0.679886	8.37058	30.225	0.000743792	0.0180377	CG43119	Ect4	Ectoderm-expressed 4	248.861	272.431	296.285	288.952	388.955	373.026	415.473
FBgn0000473	1.60495	1.47246	30.1049	0.000752896	0.0181238	CG9438	Cyp6a2	Cytochrome P450-6a2	0.909634	1.63377	1.58997	1.93075	3.3329	4.14349	4.67407
FBgn0034783	1.55145	3.33344	30.0384	0.000757994	0.0181238	CG9825	CG9825		4.01755	4.08442	6.17642	8.68836	16.0213	15.0061	13.9357
FBgn0039538	0.706414	3.31428	30.0346	0.000758285	0.0181238	CG12883	CG12883		7.39078	9.16076	8.62253	7.51975	11.1097	11.5906	12.6373
FBgn0082585	1.28199	2.94488	29.8649	0.000771509	0.0181633	CG30023	sprt	sprite	3.07001	5.42644	5.8095	5.58901	10.0572	11.9825	10.1272
FBgn0033873	1.85247	3.60844	29.7943	0.000777088	0.0181633	CG6337	CG6337		3.37323	4.95965	8.25561	7.46894	18.4771	14.8382	24.0195
FBgn0033593	2.30328	4.08095	29.9321	0.00077998	0.0181633	CG9080	Listericin	Listericin	3.90385	3.26753	9.47866	9.65374	24.4997	27.6606	34.0169
FBgn0034716	0.981061	4.29753	29.6865	0.000785719	0.0182284	CG3380	Oatp58Dc	Organic anion transporting polypeptide 58Dc	15.6154	15.6958	14.0651	12.8547	28.5343	18.5337	28.91
FBgn0033246	1.55087	7.77029	29.6551	0.000788261	0.0182284	CG11198	ACC	Acetyl-CoA carboxylase	81.4501	118.331	127.993	173.361	353.346	243.906	377.734
FBgn0053178	2.28084	3.07846	29.5752	0.000794754	0.0182284	CG33178	CG33178		1.59186	2.10056	4.34184	5.23334	17.2492	11.4786	14.1521
FBgn0037020	0.717463	4.65323	29.575	0.000794775	0.0182284	CG4289	Pex14	Peroxin 14	18.7612	18.905	20.7308	24.236	30.23	28.2205	31.8097
FBgn0036422	1.35251	8.95277	29.5405	0.000797601	0.0182363	CG3868	CG3868		230.668	230.478	415.838	370.195	758.498	680.148	687.911
FBgn0030510	1.37738	2.41617	29.4677	0.000803609	0.018254	CG12177	CG12177		2.38779	2.85909	3.24109	4.62363	8.82926	6.55119	7.31406
FBgn0032264	0.953744	5.14425	29.461	0.000804172	0.018254	CG6113	Lip4	Lipase 4	23.1199	24.7399	25.2561	32.7211	39.0008	44.1225	52.7564
FBgn0036449	0.939015	5.96435	29.4561	0.000804574	0.018254	CG5295	bmm	brummer	34.4145	50.9385	46.9653	55.8392	82.0361	87.7971	71.02
FBgn0014396	1.74881	2.64471	29.3625	0.000812396	0.0183486	CG3234	tim	timeless	1.85717	2.56735	4.28069	4.21716	10.408	7.83903	10.5167
FBgn0030304	0.984096	2.54242	29.3582	0.000812763	0.0183486	CG11715	Cyp4g15	Cyp4g15	4.09335	3.20918	5.07567	4.62363	7.77677	7.44708	7.18422
FBgn0032668	1.35639	2.33412	29.2582	0.000821229	0.0183598	CG17681	CG17681		2.691	2.21725	3.30224	4.26797	8.36149	6.21523	6.75144
FBgn0262872	0.597092	7.58673	29.1515	0.000830393	0.0184667	CG43227	milt	milton	160.55	176.855	180.033	146.127	225.526	221.005	220.46
FBgn0026439	1.16876	5.25668	29.1275	0.000832473	0.0184667	CG3747	Eaat1	Excitatory amino acid transporter 1	23.0062	17.9131	31.6771	31.7557	57.6533	53.3054	45.8752
FBgn0264894	1.06048	6.88012	29.0532	0.000838951	0.0184667	CG44085	CG44085		80.351	60.7994	101.575	94.8099	149.864	147.262	170.647
FBgn0263413	1.60431	5.33597	29.0526	0.000838998	0.0184667	CR43459	lncRNA:CR43459	long non-coding RNA:CR43459	12.4317	19.6052	30.026	28.1483	61.9218	56.9449	63.8357
FBgn0035266	0.758986	5.4521	29.0426	0.000839879	0.0184667	CG7995	Gk2	Glycerol kinase 2	32.671	34.0173	32.4721	42.5781	47.5962	54.6492	57.041
FBgn0030156	1.37731	2.27493	29.0067	0.000843036	0.0184667	CG15247	CG15247		2.08458	2.85909	3.91377	3.04855	6.84122	5.59931	7.96324
FBgn0042696	1.39219	4.53489	28.9665	0.000846586	0.0184667	CG2380	NfI	Nuclear factor I	8.33831	13.9454	16.2666	18.647	34.44	31.8041	33.7139
FBgn0031432	1.49115	6.1811	28.9554	0.000847568	0.0184667	CG9964	Cyp309a1	Cyp309a1	35.5515	37.0515	39.5046	59.2943	84.9597	88.637	144.55
FBgn0035083	1.27709	6.53267	28.9526	0.000847822	0.0184667	CG2803	Tina-1	Troponin C-akin-1	40.9335	54.031	76.3797	69.761	131.094	112.77	144.55
FBgn0028518	0.639697	5.97405	28.832	0.000858612	0.0185527	CG18480	CG18480		46.7324	49.8882	56.3828	60.0056	72.1544	77.7184	71.1931
FBgn0030073	0.646226	6.37597	28.8137	0.000860272	0.0185527	CG10962	CG10962		68.4499	76.2035	74.8509	61.8855	86.48	103.251	102.483
FBgn0050339	1.68499	3.86388	28.7808	0.000863253	0.0185527	CG30339	CG30339		5.95052	4.6679	8.74483	11.7877	24.6167	18.9257	23.1973
FBgn0038839	0.996691	3.27037	28.7697	0.000864257	0.0185527	CG10830	Ktl	Kctd12-like	5.382	6.76846	8.80598	7.26571	13.9163	11.3106	12.2045
FBgn0003863	1.35031	9.40484	28.6806	0.000872413	0.018575	CG18444	alphaTry	alphaTrypsin	356.122	296.529	450.389	605.797	921.518	953.226	1027.17
FBgn0034382	3.50906	1.90176	28.6112	0.000878832	0.018575	CG18609	CG18609		0.492718	0.116698	0.978443	1.21942	7.13358	3.1916	10.7331
FBgn0031466	2.4163	3.21102	28.5673	0.000882924	0.018575	CG3119	CG3119		1.21285	2.509	4.95337	4.87768	18.828	13.6623	15.4937
FBgn0265767	0.917213	3.28693	28.4264	0.000896219	0.018628	CG2893	zyd	zydeco	7.76979	6.24332	6.54334	8.8916	11.8113	11.0866	13.9789
FBgn0267580	3.09453	-0.265677	28.3598	0.000902599	0.018628	CR45920	lncRNA:CR45920	long non-coding RNA:CR45920	0.0379014	0.0583488	0.366916	0.304855	1.57874	1.23185	1.42819
FBgn0051015	1.72904	3.33239	28.3114	0.000907264	0.018628	CG31015	PH4alphaPV	prolyl-4-hydroxylase-alpha PV	3.37323	3.38423	7.15486	7.16409	17.0738	13.6623	15.7534
FBgn0001250	0.885051	7.23967	28.3063	0.000907757	0.018628	CG9623	if	inflated	91.9488	110.046	130.316	133.323	189.683	179.626	202.543
FBgn0030056	0.783834	5.8368	28.2935	0.000908998	0.018628	CG11284	CAH3	Carbonic anhydrase 3	40.5545	39.7355	56.1993	46.7444	72.3298	67.4716	70.1544
FBgn0037765	1.42447	2.11549	28.2499	0.000913242	0.018628	CG9458	CG9458		2.6531	1.45872	2.93533	3.30259	6.08108	6.66317	5.84259
FBgn0033504	1.20469	7.12153	28.2362	0.000914577	0.018628	CG18408	CAP	CAP	61.0213	94.1166	119.676	99.8908	202.664	176.77	195.835
FBgn0027493	1.22503	6.76952	28.1915	0.000918965	0.018628	CG17273	AdSS	Adenylosuccinate Synthetase	54.0853	62.8417	81.5165	92.4218	143.49	129.456	178.221
FBgn0034715	1.60034	5.0164	28.18	0.000920094	0.018628	CG3382	Oatp58Db	Organic anion transporting polypeptide 58Db	12.8107	11.378	21.8315	26.3191	48.7071	52.4655	45.5289
FBgn0054056	1.10422	4.53508	28.1588	0.000922186	0.018628	CG34056	CG34056		11.1051	14.9373	19.5077	19.4599	30.4639	32.196	30.468
FBgn0032048	1.10756	2.46894	28.1355	0.000924495	0.018628	CG13094	Dh31	Diuretic hormone 31	3.03211	3.61763	3.54686	5.13172	7.13358	7.11112	7.70357
FBgn0034501	0.668094	6.88051	28.0933	0.000928683	0.018628	CG13868	CG13868		98.6953	117.631	81.6388	98.4173	144.309	140.263	133.86
FBgn0017558	1.11533	6.88713	27.9616	0.000941937	0.0186452	CG8808	Pdk	Pyruvate dehydrogenase kinase	57.9513	76.9621	108.363	87.7982	152.67	169.099	156.625
FBgn0011566	0.643093	3.47135	27.9198	0.000946192	0.0186452	CG13761	Smyd3	SET and MYND domain containing, class	8.0351	9.51085	9.35636	10.4159	12.9808	12.7664	12.9835
FBgn0051028	0.6609	4.55302	27.9081	0.000947381	0.0186452	CG31028	CG31028		17.6242	23.3395	19.3854	18.5453	25.1429	30.7962	26.9625
FBgn0054045	1.43642	-0.179119	27.8342	0.000954983	0.018763	CG34045	CG34045		0.606423	0.350093	0.428069	0.508091	1.34485	1.11986	1.03868
FBgn0264953	0.74347	7.26245	27.6844	0.00097061	0.018966	CG44122	Piezo	Piezo	100.704	133.035	138.388	128.547	176.878	193.008	187.829
FBgn0053230	0.640543	3.29982	27.6806	0.000971008	0.018966	CG33230	CG33230		8.1109	7.46865	8.13331	9.39969	11.3436	11.1426	11.815
FBgn0015575	1.22913	6.74962	27.6477	0.000974493	0.018966	CG1112	alpha-Est7	alpha-Esterase-7	51.0153	62.6083	82.8007	89.8814	140.099	132.144	173.417
FBgn0037646	1.63091	2.79755	27.6131	0.000978164	0.018966	CG11967	CAHbeta	Carbonic anhydrase beta	2.16038	3.38423	5.44259	4.26797	8.59538	11.1986	11.4688
FBgn0053056	1.08481	4.37482	27.6071	0.000978806	0.018966	CG33056	CG33056		11.9768	11.1446	17.9177	17.58	26.6632	26.5407	29.4726
FBgn0261552	1.36983	7.74137	27.586	0.000981055	0.018966	CG42670	ps	pasilla	80.0099	122.941	166.58	164.672	325.455	295.083	301.175
FBgn0030234	1.30095	5.09046	27.5111	0.000989107	0.018966	CG15211	CG15211		15.5017	16.9795	27.2129	27.945	49.2918	42.8907	51.5014
FBgn0027610	1.18293	4.77634	27.4739	0.000993128	0.018966	CG8790	2020-12-01	Dicarboxylate carrier 1	13.4171	17.6797	23.5438	19.7139	36.2526	31.1321	44.4037
FBgn0005671	0.874825	8.85769	27.351	0.00100659	0.0190621	CG17369	Vha55	Vacuolar H[+]-ATPase 55kD subunit	292.826	321.268	422.32	399.106	580.919	565.866	605.249
FBgn0034429	2.15416	1.48191	27.2625	0.00101643	0.0190621	CG18607	AANATL4	Arylalkylamine N-acetyltransferase-like 4	0.758028	0.583488	1.1619	2.08317	4.7947	3.97551	4.84719
FBgn0015040	1.11413	6.31952	27.2464	0.00101822	0.0190621	CG3616	Cyp9c1	Cytochrome P450-9c1	44.989	43.4115	63.3542	71.6409	111.857	95.5801	114.342
FBgn0040060	1.59687	9.57696	27.2337	0.00101964	0.0190621	CG6457	yip7	yippee interacting protein 7	314.013	272.722	496.804	629.576	1167.45	1065.55	1222.49
FBgn0039543	0.747981	5.97708	27.2133	0.00102194	0.0190621	CG12428	CROT	Carnitine O-octanoyltransferase	52.0386	40.8442	54.9151	57.1095	73.0899	74.3588	81.1471
FBgn0015541	0.620703	6.29984	27.1577	0.00102822	0.0190621	CG14509	jus	julius seizure	57.4206	65.4673	73.5667	72.5046	92.678	93.0605	89.6297
FBgn0050495	1.7018	2.66242	27.1557	0.00102845	0.0190621	CG30495	CG30495		1.85717	2.74239	4.15838	4.62363	9.06315	8.56694	11.1658
FBgn0052645	1.48216	1.5992	27.1414	0.00103008	0.0190621	CG32645	CG32645		1.36445	1.92551	2.38495	1.37185	3.62526	3.86352	5.40981
FBgn0031401	0.74305	5.59448	27.1328	0.00103105	0.0190621	CG7082	papi	papi	36.2717	36.0012	42.5623	42.5781	56.9517	51.5696	66.1295
FBgn0036837	1.01482	8.51867	27.1094	0.00103372	0.0190811	CG18135	CG18135		192.767	258.077	309.066	311.206	533.615	499.066	414.651
FBgn0039045	0.811066	4.09964	27.0519	0.00104032	0.0190921	CG17119	CG17119		12.4317	13.3619	13.1478	15.2936	21.4007	17.3578	24.2359
FBgn0025373	0.61501	5.58483	27.0194	0.00104407	0.0190921	CG12389	Fpps	Farnesyl pyrophosphate synthase	37.8256	40.2607	46.8429	39.2755	58.6474	51.0657	57.344
FBgn0040336	1.46358	4.29054	26.9269	0.00105484	0.0190921	CG9904	Seipin	Seipin	8.33831	8.63562	12.5363	17.1227	27.2479	25.0849	33.0647
FBgn0035147	1.17377	6.95144	26.8592	0.00106281	0.0190921	CG12030	Gale	UDP-galactose 4'-epimerase	69.4354	64.067	89.6498	114.321	180.035	148.102	178.61
FBgn0035798	1.77035	5.58356	26.8445	0.00106455	0.0190921	CG7526	frac	faulty attraction	18.6475	14.7622	30.2706	35.0075	71.6281	57.3929	94.1739
FBgn0085354	0.7713	5.00159	26.829	0.0010664	0.0190921	CG34325	CG34325		21.8312	30.5748	24.033	26.8272	38.9423	34.9957	42.8457
FBgn0263456	1.20906	2.98378	26.8202	0.00106744	0.0190921	CG43479	nwk	nervous wreck	3.44903	6.30167	5.99296	5.38577	11.6944	9.07087	11.5553
FBgn0045038	1.22558	2.78413	26.8062	0.0010691	0.0190921	CG7105	Proc	Proctolin	3.60063	3.79267	5.19798	5.58901	10.5834	7.2231	10.3868
FBgn0032798	0.718647	3.69029	26.7723	0.00107315	0.0190921	CG10132	CG10132		8.56572	10.9696	11.8636	10.8732	14.9688	15.2861	15.9265
FBgn0035542	0.730175	7.60013	26.7257	0.00107876	0.0191207	CG11347	DOR	Diabetes and obesity regulated	147.588	141.613	177.587	169.245	254.236	258.856	192.2
FBgn0015570	2.75477	6.26758	27.111	0.00109337	0.0192076	CG2505	alpha-Est2	alpha-Esterase-2	7.9972	15.9876	39.6881	29.3169	145.654	101.011	170.387
FBgn0267339	0.956651	3.66263	26.5935	0.00109485	0.0192076	CG33338	p38c	p38c MAP kinase	7.31497	8.34388	11.3132	10.7207	17.9509	14.6142	16.0996
FBgn0035665	1.50416	10.4395	26.5235	0.0011035	0.0192646	CG6483	Jon65Aiii	Jonah 65Aiii	533.349	599.534	1025.53	1096.97	2320.99	1850.4	1998.82
FBgn0031914	1.54085	5.48091	26.4834	0.00110849	0.0192754	CG5973	CG5973		16.1081	18.6133	32.1663	35.8713	68.3537	61.7603	69.2455
FBgn0038646	0.845673	4.20089	26.4785	0.0011091	0.0192754	CG7715	CG7715		18.0411	11.203	12.8421	15.3444	25.5522	22.5092	20.7304
FBgn0013308	1.77511	3.96059	26.4393	0.001114	0.0193006	CG8719	Odc2	Ornithine decarboxylase 2	4.58607	5.54314	10.3348	11.4321	23.3303	21.1094	28.0012
FBgn0033943	1.36246	-0.161699	26.4374	0.00111425	0.0193006	CG12869	CG12869		0.454817	0.46679	0.428069	0.660519	1.22791	1.06387	1.16852
FBgn0002573	1.2331	2.38149	26.4271	0.00111555	0.0193006	CG32120	sens	senseless	2.23618	3.50093	4.09723	3.86149	8.24454	7.39108	5.84259
FBgn0260386	0.922828	3.15669	26.4084	0.0011179	0.0193125	CG7549	mtg	mind the gap	6.74645	5.13469	8.56137	6.40195	10.7004	12.3745	10.8196
FBgn0027600	1.31075	4.19115	26.3819	0.00112124	0.0193414	CG4778	obst-B	obstructor-B	8.45201	8.92737	12.9032	16.4114	28.4758	22.4532	26.2267
FBgn0036485	0.854587	3.26301	26.2865	0.00113341	0.0194357	CG6869	FucTA	alpha1,3-fucosyltransferase A	5.95052	7.4103	7.21602	9.14565	12.9223	12.7104	10.257
FBgn0036262	1.928	7.74508	26.2649	0.00113618	0.0194544	CG6910	CG6910		58.7851	66.0508	119.187	163.453	332.238	309.922	391.324
FBgn0037288	2.60537	1.19682	26.2022	0.00114431	0.0194755	CG14661	CG14661		0.379014	0.350093	0.611527	1.57508	4.61928	3.13561	4.11145
FBgn0003499	0.842012	3.02524	26.1906	0.00114581	0.0194755	CG7847	sr	stripe	5.04089	7.70204	6.66564	5.94467	9.94023	11.2546	9.0452
FBgn0039821	1.21716	2.44129	26.16	0.00114981	0.0195148	CG15556	CG15556		2.7668	3.15083	3.4857	4.92849	7.89371	6.27122	7.96324
FBgn0264488	0.79421	8.24394	26.0739	0.00116113	0.0196445	CG43896	CG43896		251.855	197.219	230.607	290.323	371.706	355.724	390.026
FBgn0039805	1.86676	2.02588	26.0633	0.00116254	0.0196445	CG12045	Cpr100A	Cuticular protein 100A	1.36445	0.991929	2.87418	2.64208	6.72427	6.4392	5.97243
FBgn0027547	0.762184	6.22054	26.0286	0.00116714	0.0196937	CG1927	CG1927		52.0386	51.5803	69.2248	68.2367	93.4966	88.245	90.5385
FBgn0037238	0.926336	1.93759	26.0002	0.00117094	0.019729	CG1090	CG1090		2.23618	2.85909	3.24109	3.04855	4.91164	4.92739	4.54424
FBgn0004858	0.641384	4.43659	25.9643	0.00117576	0.0197552	CG4220	elB	elbow B	15.1985	18.3799	19.8746	19.7139	24.5582	25.7008	25.6209
FBgn0051221	0.682232	4.19759	25.9505	0.00117762	0.0197553	CG31221	CG31221		13.5687	13.3619	17.4897	16.5638	22.2193	23.4611	19.6051
FBgn0038795	1.20999	4.37779	25.9034	0.00118399	0.0197992	CG4335	CG4335		9.47535	15.7542	14.2486	16.2589	25.8446	24.077	35.2719
FBgn0028480	0.611982	5.27645	25.8188	0.00119554	0.0198975	CG17841	CG17841		28.6156	34.6008	33.3282	36.1253	43.2108	43.6746	47.7361
FBgn0036595	1.67975	2.36908	25.7731	0.00120184	0.0198975	CG13046	CG13046		1.59186	2.33395	2.81302	4.26797	9.41398	8.00701	6.18882
FBgn0038420	1.05159	5.03771	25.7553	0.00120432	0.0198975	CG10311	CG10311		18.1927	18.6133	27.3352	30.079	42.3337	44.0665	43.7545
FBgn0263598	0.836046	9.16714	25.7342	0.00120724	0.0198975	CG3762	Vha68-2	Vacuolar H[+] ATPase 68 kDa subunit	411.192	373.024	484.574	538.729	721.368	672.757	751.617
FBgn0027560	1.06835	6.87329	25.7272	0.00120821	0.0198975	CG4104	Tps1	Trehalose-6-phosphate synthase 1	77.5842	64.1253	93.9917	99.1286	138.812	137.967	188.391
FBgn0051004	0.850999	7.05486	25.7118	0.00121037	0.0199015	CG31004	mesh	mesh	81.3743	106.895	114.906	112.288	174.597	144.35	178.827
FBgn0262870	0.683622	6.2845	25.6432	0.00121999	0.020003	CG43225	axo	axotactin	57.5343	74.278	70.509	57.9732	92.7365	85.8373	98.7182
FBgn0037845	1.51597	0.226354	25.6244	0.00122264	0.0200181	CG14694	CG14694		0.606423	0.583488	0.672679	0.660519	1.34485	1.23185	2.16392
FBgn0031950	0.663879	6.21805	25.5758	0.00122953	0.0200548	CG14536	Herp	Homocysteine-induced endoplasmic reticulum protein	57.7997	54.4394	73.3832	64.426	83.9657	91.3807	88.2881
FBgn0266758	1.02812	6.71404	25.5599	0.0012318	0.0200548	CG6643	Esyt2	Extended synaptotagmin-like protein 2	67.7298	55.0813	87.6318	94.3018	135.947	132.48	145.199
FBgn0052843	1.04154	3.12537	25.5027	0.00124001	0.0200679	CG32843	Dh31-R	Diuretic hormone 31 Receptor	4.54817	6.12662	6.9714	7.36733	11.9283	9.6868	12.5075
FBgn0036834	1.76573	1.53114	25.4812	0.0012431	0.0200679	CG6836	CG6836		0.833831	1.57542	1.34536	2.08317	4.15151	3.30359	5.58292
FBgn0027779	0.675187	7.84334	25.437	0.0012495	0.0200679	CG17332	VhaSFD	Vacuolar H[+]-ATPase SFD subunit	186.361	162.851	206.818	212.839	267.158	268.767	280.401
FBgn0030336	0.585728	5.54484	25.4173	0.00125237	0.0200679	CG1578	CG1578		34.1871	41.4276	42.0119	43.7467	52.9756	53.8093	54.2712
FBgn0264907	0.614651	4.88244	25.4126	0.00125306	0.0200679	CG44098	CG44098		25.3939	21.7058	29.7202	23.9819	34.7908	36.2275	31.8097
FBgn0262624	0.797203	4.12852	25.405	0.00125417	0.0200679	CG12026	Tmhs	Tetraspan membrane protein in hair cell	11.8631	15.4041	16.7558	11.6861	22.8041	23.2931	18.4366
FBgn0263120	0.826994	7.36744	25.3779	0.00125813	0.0200679	CG8732	Acsl	Acyl-CoA synthetase long-chain	107.678	145.288	125.669	142.824	198.805	181.194	233.055
FBgn0052656	1.57903	7.42787	25.3732	0.00125882	0.0200679	CG32656	Muc11A	Mucin 11A	50.5984	88.3984	129.154	121.281	275.637	283.661	220.72
FBgn0030484	1.48466	6.6569	25.3274	0.00126556	0.0200679	CG1681	GstT4	Glutathione S transferase T4	49.4234	45.337	55.4043	88.8144	118.464	131.92	192.286
FBgn0024989	0.606261	6.79491	25.3164	0.00126718	0.0200679	CG3777	CG3777		82.3977	100.302	98.7004	100.043	142.262	120.721	123.517
FBgn0259216	0.8119	6.45362	25.2818	0.00127233	0.0200679	CG42316	RhoGAP102A	Rho GTPase activating protein at 102A	58.7851	57.9404	79.9877	81.1422	111.448	110.754	103.133
FBgn0034920	1.32641	4.96849	25.1987	0.00128476	0.0202006	CG5597	CG5597		16.8661	12.4866	22.3819	27.8434	43.3277	42.4427	47.1302
FBgn0037151	1.33108	3.2945	25.1713	0.0012889	0.0202006	CG7130	CG7130		5.68521	4.49286	9.41751	5.23334	13.2147	16.9099	11.5986
FBgn0030098	1.08348	8.37083	25.1486	0.00129234	0.0202006	CG12057	CG12057		175.18	202.12	304.112	257.399	448.597	513.008	370.593
FBgn0039315	1.33601	3.5691	25.1325	0.00129478	0.0202006	CG13658	CG13658		5.00299	7.2936	8.43907	9.24726	13.4485	15.1181	21.3796
FBgn0052068	0.656538	5.92816	25.1023	0.00129937	0.0202179	CG32068	Adi1	Acireductone dioxygenase 1	48.5517	43.1781	54.3036	58.9894	74.3178	69.5434	71.2364
FBgn0025390	1.34117	1.41655	25.0585	0.00130609	0.020268	CG14796	Mur2B	Mucin related 2B	1.28865	1.45872	2.26265	1.57508	3.68373	2.96763	4.32785
FBgn0035710	1.84556	6.59371	25.0104	0.00131351	0.0203097	CG10121	SP1173	SP1173	26.152	31.7417	65.5557	67.8302	158.4	133.599	166.492
FBgn0034489	2.12241	1.50193	25.007	0.00131403	0.0203097	CG11209	ppk6	pickpocket 6	1.06124	0.46679	1.46766	1.72751	5.204	3.02362	5.45309
FBgn0037890	1.25166	5.13206	24.9627	0.00132092	0.0203619	CG17734	CG17734		17.8895	18.73	26.2345	29.4185	53.6188	35.8356	56.3053
FBgn0013343	0.705352	5.80095	24.9448	0.00132373	0.0203694	CG31136	Syx1A	Syntaxin 1A	35.9684	50.0633	51.5517	46.7444	67.3597	67.4716	65.2206
FBgn0017581	0.756583	9.29166	24.8958	0.00133142	0.0204129	CG17342	Lk6	Lk6 kinase	424.761	562.599	591.469	456.469	788.085	820.746	684.189
FBgn0033753	1.56198	1.94968	24.8483	0.00133893	0.0204129	CG8587	Cyp301a1	Cyp301a1	1.32655	1.63377	3.24109	2.48965	5.78872	5.87927	5.36653
FBgn0038852	1.80754	0.192721	24.8355	0.00134096	0.0204129	CG7056	HHEX	Hematopoietically expressed homeobox	0.303211	0.641837	0.794985	0.457282	1.52027	2.18373	1.34163
FBgn0033677	0.726857	4.14288	24.8059	0.00134568	0.0204129	CG8321	CG8321		12.0526	14.8206	14.9213	15.9541	20.1143	19.5976	23.63
FBgn0265935	0.648338	7.67104	24.8036	0.00134604	0.0204129	CG9446	coro	coro	163.772	151.182	182.969	191.296	248.272	225.036	244.956
FBgn0033777	0.594037	6.26024	24.7457	0.00135534	0.0204129	CG17574	CG17574		66.7065	57.5319	66.4118	73.7749	85.0182	86.9012	93.1785
FBgn0036226	1.47144	5.64657	24.7186	0.00135972	0.0204129	CG7252	CG7252		22.9304	18.905	32.2886	45.0169	79.9311	65.5679	74.8717
FBgn0031975	1.7419	4.0539	24.7158	0.00136017	0.0204129	CG7356	Tg	Transglutaminase	6.40534	4.84295	9.84558	13.4644	20.5821	26.8767	29.4294
FBgn0034470	0.884528	8.75531	24.6729	0.00136713	0.0204129	CG11218	Obp56d	Odorant-binding protein 56d	362.868	246.057	320.562	404.542	546.888	596.55	498.525
FBgn0032752	0.869956	2.48772	24.6475	0.00137128	0.0204129	CG10702	CG10702		4.35866	3.67597	4.5253	4.57282	6.13955	6.49519	8.09307
FBgn0015035	3.33706	3.54464	25.0623	0.00137661	0.0204129	CG4105	Cyp4e3	Cytochrome P450-4e3	0.79593	0.816883	4.58645	3.81069	30.3469	13.2704	23.1107
FBgn0000303	0.887563	1.61484	24.5962	0.00137971	0.0204129	CG12345	ChAT	Choline acetyltransferase	2.16038	2.56735	2.3238	2.13398	3.27443	3.80753	4.15473
FBgn0039483	2.98388	0.712966	24.5589	0.00138587	0.0204129	CG14259	CG14259		0.0758028	0.175046	0.794985	0.660519	3.15748	2.51969	3.02949
FBgn0042627	2.20724	5.32472	24.9105	0.00140114	0.0204593	CG3524	FASN2	Fatty acid synthase 2	7.08756	11.4364	27.0295	20.1712	63.6759	58.2888	79.6757
FBgn0032130	0.736516	4.057	24.4023	0.00141214	0.0204593	CG3838	brwl	brickwall	10.8019	16.4544	14.004	13.0071	21.3423	19.2056	19.5186
FBgn0020503	0.776049	7.66196	24.3954	0.00141332	0.0204593	CG5020	CLIP-190	Cytoplasmic linker protein 190	124.847	184.499	178.505	164.418	263.007	241.274	239.46
FBgn0250819	0.707263	6.75616	24.3798	0.00141597	0.0204593	CG33521	CG33521		81.7154	77.0204	106.589	91.9137	141.151	123.129	124.252
FBgn0028665	0.685306	7.93295	24.3603	0.0014193	0.0204593	CG2934	VhaAC39-1	Vacuolar H[+] ATPase AC39 subunit 1	208.079	167.403	214.218	225.593	284.174	283.325	303.598
FBgn0030747	1.51559	6.08274	24.3535	0.00142046	0.0204593	CG4301	CG4301		23.0062	31.5667	47.0264	56.2965	102.677	89.3089	108.759
FBgn0035544	2.32041	0.491379	24.3351	0.00142361	0.0204593	CG15021	CG15021		0.341113	0.291744	0.489221	0.914565	2.04652	1.45582	3.20261
FBgn0014906	0.695133	5.8284	24.3002	0.00142962	0.0204593	CG3488	Hydr2	alpha/beta hydrolase2	43.4729	54.0893	51.674	39.6819	72.0959	60.4165	70.3708
FBgn0011554	1.19931	4.60624	24.2902	0.00143134	0.0204593	CG12386	etaTry	etaTrypsin	12.7728	12.1365	17.9177	22.6609	34.1476	29.5083	36.3539
FBgn0039737	1.20959	7.63856	24.2601	0.00143655	0.0204593	CG7920	CG7920		95.8148	111.388	168.353	159.236	283.355	228.228	310.48
FBgn0261534	1.98055	6.12247	24.2368	0.0014406	0.0204593	CG7532	l(2)34Fc	lethal (2) 34Fc	17.7	20.7138	38.8931	51.4189	122.323	84.5495	131.22
FBgn0032772	1.71518	2.14503	24.2105	0.0014452	0.0204593	CG17350	CG17350		1.47816	1.45872	3.73031	2.59127	7.13358	6.27122	6.75144
FBgn0024947	1.03201	6.57801	24.209	0.00144545	0.0204593	CG3059	NTPase	NTPase	57.7238	64.6505	70.0198	84.6988	111.974	105.547	157.317
FBgn0035612	0.853228	8.55351	24.1947	0.00144796	0.0204593	CG10625	frm	farmer	238.627	283.283	356.031	295.303	494.848	541.677	381.673
FBgn0011202	0.641967	6.64434	24.181	0.00145037	0.0204593	CG1768	dia	diaphanous	69.6249	93.183	92.2794	83.9875	113.845	120.441	117.631
FBgn0039849	0.770455	5.55126	24.1689	0.00145249	0.0204593	CG11334	CG11334		31.7614	33.1421	42.868	43.2386	57.7703	53.2494	60.2436
FBgn0259111	1.11731	6.61957	24.1535	0.0014552	0.0204593	CG42253	Ndae1	Na[+]-driven anion exchanger 1	41.9569	77.6039	78.52	76.8234	133.199	132.144	131.999
FBgn0036780	2.09246	0.325178	24.1471	0.00145634	0.0204593	CG7330	CG7330		0.227408	0.350093	0.794985	0.711328	2.04652	1.6238	2.12064
FBgn0259938	0.745576	5.98291	24.1263	0.00146002	0.0204593	CG17100	cwo	clockwork orange	43.2834	60.0993	59.1958	43.5942	77.3584	83.3737	69.5485
FBgn0052499	1.13115	5.23144	24.0706	0.00146993	0.0205057	CG32499	Cda4	Chitin deacetylase-like 4	18.8749	20.4221	31.7382	33.1276	50.1105	49.0499	52.7997
FBgn0085359	1.54043	7.03084	23.9867	0.00148502	0.0206407	CG34330	CG34330		62.4994	42.2445	109.708	86.9344	223.714	172.235	189.387
FBgn0029504	0.651049	5.59476	23.8923	0.00150223	0.0208299	CG12690	CHES-1-like	Checkpoint suppressor 1-like	33.05	46.9124	40.9723	42.2224	54.0865	59.2966	56.9545
FBgn0034292	1.22496	5.68718	23.7874	0.00152166	0.0208994	CG5767	CG5767		26.4552	23.3395	41.5227	45.8298	71.862	74.5827	67.7308
FBgn0053196	0.992778	10.8786	23.7561	0.00152752	0.0209104	CG33196	dpy	dumpy	929.153	1534.81	1539.64	1549.07	2446.82	2620.59	2306.14
FBgn0040299	0.755972	5.43589	23.717	0.00153487	0.020932	CG6976	Myo28B1	Myosin 28B1	29.2978	30.5748	38.7708	41.5111	56.367	50.2258	51.1119
FBgn0263241	0.952392	4.00413	23.6962	0.00153881	0.0209365	CG33048	Mocs1	Molybdenum cofactor synthesis 1	10.7261	9.5692	12.2305	15.3444	17.5416	20.8854	23.0674
FBgn0031936	1.6179	0.831642	23.5394	0.00156888	0.0210773	CG13794	CG13794		0.644324	0.758534	1.28421	1.1178	1.92957	3.52756	2.29376
FBgn0035790	2.22852	1.43538	23.5369	0.00156935	0.0210773	CG8540	Cyp316a1	Cyp316a1	0.492718	0.641837	1.22305	1.93075	4.7947	3.47157	5.0203
FBgn0001186	1.00819	6.21436	23.5305	0.00157059	0.0210773	CG3001	Hex-A	Hexokinase A	36.0821	64.8839	59.9908	56.6014	95.1338	91.1567	104.344
FBgn0028670	0.752583	8.49754	23.4918	0.00157814	0.021081	CG18617	Vha100-2	Vacuolar H[+] ATPase 100kD subunit 2	278.234	243.723	313.591	338.948	434.271	410.037	470.35
FBgn0041780	2.07949	0.0199307	23.4748	0.00158147	0.021081	CG11833	Ssl2	Strictosidine synthase-like 2	0.26531	0.233395	0.366916	0.762137	1.57874	1.23185	1.77442
FBgn0004428	2.45505	4.86227	23.8865	0.00158209	0.021081	CG1180	LysE	Lysozyme E	5.23039	4.31781	15.0436	16.9703	47.2453	48.658	56.0456
FBgn0001257	0.669729	5.8375	23.4298	0.00159032	0.0211168	CG15009	ImpL2	Ecdysone-inducible gene L2	41.7674	58.5238	47.4545	44.204	69.874	76.0386	57.6902
FBgn0025814	1.28892	5.14567	23.3114	0.00161393	0.0212704	CG1742	Mgstl	Microsomal glutathione S-transferase-like	19.7087	16.3377	24.7057	30.8411	42.743	42.1068	63.2731
FBgn0011695	2.29511	4.95478	23.7151	0.00161524	0.0212704	CG11390	EbpIII	Ejaculatory bulb protein III	8.26251	5.36809	12.9644	21.7971	48.8241	40.595	68.2069
FBgn0040305	0.671326	5.03286	23.2801	0.00162024	0.0212704	CG3743	MTF-1	Metal response element-binding Transcription Factor-1	23.5747	30.0496	31.6159	24.3884	41.2227	35.6116	39.1237
FBgn0031263	0.677845	6.61004	23.2475	0.00162685	0.0212866	CG2789	Tspo	Translocator protein	81.1469	68.9099	80.905	95.6228	110.687	112.378	123.906
FBgn0015033	2.25911	4.39861	23.6368	0.00163068	0.0212866	CG4321	Cyp4d8	Cytochrome P450-4d8	3.14582	5.83488	12.2917	12.3466	34.9662	31.0761	40.8116
FBgn0085455	1.58742	3.44176	23.2064	0.00163523	0.0212866	CG34426	CG34426		4.62397	5.13469	4.46415	10.111	14.0333	14.3902	20.0379
FBgn0033337	0.628552	4.0905	23.1185	0.00165334	0.0212866	CG8272	CG8272		13.3413	12.6033	14.9824	16.8178	19.0034	20.1575	20.211
FBgn0053307	1.5589	4.75672	23.1099	0.00165513	0.0212866	CG33307	CG33307		10.7261	10.1527	22.3819	18.3929	40.0533	32.028	48.3853
FBgn0259247	1.08818	6.90498	23.0926	0.00165873	0.0212866	CG42345	stw	straw	64.0913	65.4673	99.6789	109.646	158.81	154.933	166.362
FBgn0264489	0.972986	8.93819	23.0734	0.00166274	0.0212866	CG43897	CG43897		320.494	286.201	429.842	421.716	619.51	557.075	723.616
FBgn0034365	0.816492	5.0746	23.0627	0.00166498	0.0212866	CG5335	CG5335		27.0616	21.1223	25.5618	32.8227	40.5795	37.9633	46.005
FBgn0004168	0.778463	2.0199	23.0458	0.00166853	0.0212866	CG16720	5-HT1A	5-hydroxytryptamine (serotonin) receptor 1A	2.7668	3.67597	3.3634	2.99774	4.91164	4.75941	4.89047
FBgn0037672	0.890124	4.97385	23.0427	0.00166917	0.0212866	CG12952	sage	salivary gland-expressed bHLH	25.0149	17.0962	26.051	28.3007	43.3862	43.5626	32.632
FBgn0262394	0.968666	1.31825	23.018	0.00167438	0.0212866	CR42931	mir-281-1	mir-281-1 stem loop	2.34989	1.57542	1.58997	1.62589	3.09901	3.41558	2.85638
FBgn0052473	0.789226	7.12473	23.0116	0.00167571	0.0212866	CG32473	CG32473		92.631	111.563	117.964	124.787	183.251	143.006	186.487
FBgn0030187	1.92249	0.149963	23.0007	0.00167803	0.0212866	CG2961	Ipod	Interaction partner of Dnmt2	0.379014	0.408442	0.672679	0.508091	1.34485	1.06387	2.42359
FBgn0036862	1.32329	7.22594	22.9961	0.001679	0.0212866	CG9619	Gbs-76A	Glycogen binding subunit 76A	61.2866	75.445	133.619	111.17	223.246	198.383	215.397
FBgn0038744	0.988007	3.13581	22.9911	0.00168005	0.0212866	CG4733	CG4733		4.43447	6.82681	7.46063	7.06247	10.4665	11.0306	12.3776
FBgn0037275	1.27551	1.55481	22.9889	0.00168052	0.0212866	CG14655	CG14655		1.40235	1.34202	2.38495	2.33722	3.97609	4.19948	3.85178
FBgn0266417	1.00942	5.06377	22.9522	0.00168832	0.0212866	CG45057	ringer	ringmaker	19.1402	22.5226	26.6626	29.4185	36.6619	40.203	53.4056
FBgn0036752	0.971552	5.288	22.9404	0.00169083	0.0212866	CG5992	Adgf-A	Adenosine deaminase-related growth factor A	20.9216	30.9832	26.9683	37.1923	52.04	45.2984	53.8817
FBgn0050043	1.40375	5.54125	22.9287	0.00169333	0.0212866	CG30043	CG30043		16.7903	22.9311	37.1197	37.4463	75.7796	63.1042	63.1866
FBgn0031929	1.51873	5.57212	22.9255	0.00169402	0.0212866	CG18585	CG18585		22.286	16.4544	37.9147	34.0421	81.8607	52.8014	76.3865
FBgn0035265	1.89328	2.84362	22.9149	0.00169628	0.0212866	CG18173	PIG-Wb	Phosphatidylinositol glycan anchor biosynthesis class W	2.16038	2.2756	4.5253	4.82687	11.1681	7.33509	15.234
FBgn0003463	0.742287	5.76837	22.9042	0.00169859	0.0212866	CG9224	sog	short gastrulation	36.0821	44.8119	54.4259	42.324	69.5231	72.231	56.6948
FBgn0028583	2.62267	2.16858	22.8215	0.00171645	0.021464	CG12794	lcs	la costa	1.89507	0.408442	2.38495	1.06699	4.03456	10.5827	9.0452
FBgn0051973	1.97383	3.77807	22.7349	0.00173543	0.0215386	CG31973	Cda5	Chitin deacetylase-like 5	2.42569	5.48479	9.11175	8.43432	24.909	18.7017	22.7645
FBgn0032774	0.977817	7.20232	22.7236	0.00173794	0.0215467	CG17549	CG17549		79.7825	93.9416	127.259	135.406	187.11	197.152	189.04
FBgn0004368	0.667921	5.99103	22.6876	0.00174591	0.0216224	CG6899	Ptp4E	Protein tyrosine phosphatase 4E	41.5399	58.2321	56.9943	56.5506	74.9026	80.182	70.7603
FBgn0010019	1.02607	7.95648	22.6738	0.00174898	0.0216373	CG3972	Cyp4g1	Cytochrome P450-4g1	151.985	148.498	218.56	203.084	299.669	281.533	393.531
FBgn0260753	1.55524	1.94066	22.6284	0.00175914	0.0217081	CG13758	Pdfr	Pigment-dispersing factor receptor	1.66766	3.55928	1.46766	1.98156	4.85317	5.15136	6.75144
FBgn0022382	1.04402	7.03682	22.6236	0.00176023	0.0217081	CG15862	Pka-R2	Protein kinase, cAMP-dependent, regulatory subunit type	64.0913	85.4226	119.003	109.9	172.492	179.906	168.396
FBgn0042102	1.32333	4.64705	22.6127	0.00176266	0.0217081	CG18745	CG18745		12.2801	10.3861	17.9789	23.0673	35.7264	32.8119	37.6523
FBgn0037520	2.03467	1.18353	22.6065	0.00176406	0.0217081	CG18268	CG18268		0.492718	0.641837	1.1619	1.6767	4.26845	2.74366	3.76523
FBgn0051201	0.684675	4.61572	22.5871	0.00176844	0.021732	CG31201	GluRIIE	Glutamate receptor IIE	23.3852	15.6958	22.0761	20.4253	28.7682	28.7244	29.6457
FBgn0003515	1.65198	1.61581	22.5534	0.00177608	0.0217635	CG4314	st	scarlet	1.06124	1.34202	1.58997	2.54046	4.61928	3.35958	5.58292
FBgn0050296	0.960402	5.63939	22.4754	0.00179392	0.0219127	CG30296	RIC-3	RIC3 acetylcholine receptor chaperone	38.8868	25.4401	43.7242	40.7997	66.0733	56.217	70.0246
FBgn0025837	1.96052	5.34258	22.7382	0.00179727	0.0219305	CG17636	CG17636		11.2567	10.036	30.2706	24.1852	77.6507	55.2651	64.0521
FBgn0262508	1.47322	7.70963	22.4283	0.00180481	0.0219994	CG43078	CG43078		79.4414	91.3742	180.706	146.229	317.97	261.04	341.251
FBgn0033129	1.14303	3.05713	22.3369	0.00182616	0.0221902	CG12844	Tsp42Eh	Tetraspanin 42Eh	5.4957	3.61763	6.29873	7.36733	10.4665	10.6387	12.3344
FBgn0265180	1.02256	8.36435	22.3367	0.00182621	0.0221902	CG44245	CG44245		264.476	159.234	280.691	256.535	502.508	378.905	418.027
FBgn0025643	1.42802	7.81597	22.2887	0.00183755	0.022258	CG3588	CG3588		104.456	84.139	152.637	206.133	328.203	332.263	323.463
FBgn0085485	2.03779	0.905294	22.1989	0.00185903	0.0224014	CG34456	CG34456		0.379014	0.525139	0.91729	1.42266	2.9236	2.57568	3.28916
FBgn0032801	1.24213	3.03148	22.1177	0.00187872	0.0224101	CG10165	CG10165		4.13125	5.018	5.19798	7.11328	11.9867	7.89502	13.676
FBgn0030482	1.69172	6.07682	22.0048	0.00190653	0.0225516	CG1673	CG1673		15.4259	53.3308	36.6305	39.5803	110.453	98.6038	102.57
FBgn0038679	0.755531	6.07188	21.9912	0.00190991	0.0225579	CG6040	CG6040		41.0093	55.7231	64.5772	56.7538	83.9657	86.5093	75.1314
FBgn0029662	0.626613	4.34323	21.9841	0.00191168	0.0225579	CG12206	CG12206		18.6475	14.6455	18.1012	17.58	21.4592	22.9012	26.2267
FBgn0035649	1.34224	3.71874	21.9246	0.0019266	0.0226044	CG10483	CG10483		8.30041	4.25946	10.396	10.1618	18.2432	18.2537	19.432
FBgn0036876	1.33946	3.41989	21.8707	0.00194024	0.0226288	CG9451	CG9451		5.15459	5.65983	7.03256	9.09484	13.2731	11.4226	20.2543
FBgn0017561	2.03637	3.1557	21.8706	0.00194028	0.0226288	CG1615	Ork1	Open rectifier K[+] channel 1	1.28865	4.72625	4.40299	5.58901	15.2027	12.0945	16.0563
FBgn0033115	1.25072	1.63601	21.8114	0.00195542	0.0226288	CG9460	Spn42De	Serpin 42De	2.12248	1.80881	1.22305	2.7945	4.26845	4.14349	4.24129
FBgn0035094	1.28841	6.77637	21.7969	0.00195915	0.0226288	CG9380	CG9380		47.1115	59.1657	75.9516	101.618	151.969	132.816	176.143
FBgn0013773	1.09647	2.73004	21.7879	0.00196146	0.0226288	CG10240	Cyp6a22	Cyp6a22	4.47237	4.02607	4.76991	5.23334	8.06913	6.49519	11.5121
FBgn0029507	0.825099	5.81175	21.7871	0.00196167	0.0226288	CG12846	Tsp42Ed	Tetraspanin 42Ed	36.8023	40.9025	45.9257	53.502	68.7045	60.0246	79.416
FBgn0030347	0.988011	3.56163	21.7508	0.00197104	0.0226288	CG15739	CG15739		8.98263	8.81067	7.82754	9.09484	13.1562	11.8705	20.2976
FBgn0032706	1.03129	3.84783	21.7367	0.00197471	0.0226288	CG10369	Irk3	Inwardly rectifying potassium channel 3	10.3471	6.88516	10.2125	14.0741	20.1143	18.4217	18.0904
FBgn0036749	2.08608	2.05845	21.7352	0.00197511	0.0226288	CG7460	CG7460		1.13704	1.10863	1.71227	3.20098	6.72427	4.31146	9.0452
FBgn0260004	1.03163	1.71965	21.7304	0.00197635	0.0226288	CG7000	Snmp1	Sensory neuron membrane protein 1	2.19828	1.80881	2.44611	2.84531	4.20998	3.63955	4.76063
FBgn0032896	2.16922	0.410856	21.6645	0.00199359	0.0226288	CG14400	CG14400		0.26531	0.350093	0.856137	0.660519	2.63124	1.23185	2.38032
FBgn0036391	1.42148	0.400208	21.6535	0.00199649	0.0226288	CG17364	CG17364		0.454817	0.875232	0.856137	0.863755	2.04652	1.45582	1.86097
FBgn0036732	0.715762	7.12173	21.6302	0.00200266	0.0226288	CG7571	Oatp74D	Organic anion transporting polypeptide 74D	97.4066	143.071	117.597	101.669	167.581	160.42	173.114
FBgn0035084	1.37193	1.06984	21.5906	0.00201317	0.0226288	CG15861	CG15861		0.947535	1.28367	1.83458	1.01618	3.04054	2.29572	3.28916
FBgn0015336	0.966241	2.18015	21.5671	0.00201945	0.0226288	CG15865	CG15865		2.6531	2.97579	3.42455	4.21716	6.43191	5.15136	5.66948
FBgn0264699	0.876262	2.98911	21.5531	0.00202322	0.0226288	CG43968	CG43968		4.39656	7.23525	5.87066	6.85923	10.6419	9.46283	9.60782
FBgn0037440	0.909823	6.24214	21.5489	0.00202433	0.0226288	CG1041	CRAT	Carnitine O-Acetyl-Transferase	49.9162	46.6207	63.0484	71.1328	95.1923	82.8697	109.624
FBgn0259221	0.626123	6.44119	21.4938	0.0020392	0.0226683	CG42321	ATP8A	ATPase 8A	65.5694	67.6263	83.8403	79.0082	92.9704	104.651	106.162
FBgn0032726	0.776909	7.2012	21.47	0.00204566	0.0226683	CG10621	CG10621		126.25	109.812	90.2613	148.007	180.795	185.561	174.196
FBgn0031562	0.674623	5.30467	21.47	0.00204566	0.0226683	CG3604	CG3604		32.4815	30.6915	28.8029	40.19	45.4912	43.6746	50.8089
FBgn0034225	0.704844	6.15086	21.4494	0.00205126	0.0226683	CG4827	veil	veil	69.3975	44.3451	58.7066	62.8509	89.4621	82.9257	82.6619
FBgn0028983	0.793551	5.9679	21.4198	0.00205937	0.0226683	CG10913	Spn55B	Serpin 55B	41.2367	47.3792	51.1236	60.158	81.0421	65.0079	84.0035
FBgn0032286	2.10764	7.4139	21.4139	0.00206099	0.0226683	CG7300	CG7300		46.2776	35.6511	78.9481	133.831	274.292	234.443	337.096
FBgn0032373	1.45958	7.13653	21.4031	0.00206395	0.0226683	CG12602	Vha100-5	Vacuolar H[+] ATPase 100kD subunit 5	47.2252	68.5015	122.183	98.7222	216.171	187.409	214.099
FBgn0052249	1.98995	9.09653	21.3846	0.00206903	0.0226683	CG32249	CG32249		158.428	115.005	380.247	352.768	959.408	813.579	901.577
FBgn0030581	0.650723	3.82765	21.383	0.00206948	0.0226683	CG14408	CG14408		9.66486	12.4283	13.3924	12.245	18.4771	15.6781	15.7101
FBgn0031258	1.12538	4.70328	21.3807	0.00207012	0.0226683	CG4297	CG4297		10.9914	17.3879	21.7092	22.3052	36.2526	33.7078	35.2287
FBgn0031974	0.930013	3.67832	21.3773	0.00207107	0.0226683	CG12560	CG12560		7.65609	8.28553	10.5183	12.0418	15.5535	14.5582	18.5232
FBgn0038804	1.02637	3.81402	21.3765	0.00207127	0.0226683	CG10877	CG10877		8.52782	8.11048	10.396	13.6168	18.1848	15.5661	21.1632
FBgn0259101	1.67917	5.36976	21.3392	0.00208164	0.0226683	CG42249	CG42249		13.0381	13.7703	27.9468	34.1437	64.4361	57.8968	67.5577
FBgn0031277	2.5403	1.6675	21.3351	0.00208275	0.0226683	CG13947	CG13947		0.947535	0.350093	1.83458	1.1178	2.39735	6.99913	6.92455
FBgn0265191	1.49032	5.72217	21.3095	0.00208991	0.0226683	CG44244	Gyg	Glycogenin	18.0411	23.8063	42.7457	39.8344	87.8833	63.2721	81.7963
FBgn0025595	0.999385	4.91341	21.3063	0.00209079	0.0226683	CG11325	AkhR	Adipokinetic hormone receptor	19.1402	15.4624	24.7668	28.9612	42.2752	37.7953	37.7388
FBgn0027074	1.78281	3.88404	21.2506	0.00210645	0.0227372	CG17324	Ugt36F1	UDP-glycosyltransferase family 36 member F1	4.69977	4.60955	13.0867	7.7738	20.2313	20.8854	27.5684
FBgn0265597	0.647208	3.12044	21.1771	0.00212732	0.0227498	CG44424	rad	radish	6.25373	8.11048	7.70524	7.11328	9.00468	11.3106	10.0406
FBgn0038542	1.02534	3.74033	21.1425	0.00213725	0.0227499	CG7431	TyrR	Tyramine receptor	7.88349	7.76039	14.004	9.04403	17.7755	19.0376	15.7101
FBgn0027586	1.32921	4.40695	21.1318	0.00214032	0.0227499	CG5867	CG5867		12.0147	8.51892	14.3097	18.9518	28.8851	23.909	36.7867
FBgn0030309	0.599392	5.98641	21.1264	0.00214187	0.0227499	CG1572	CG1572		60.9834	44.4034	51.9798	60.971	73.0899	73.6309	73.1839
FBgn0038734	1.05272	4.45987	21.1099	0.00214666	0.02275	CG11453	CG11453		14.213	10.211	18.1623	20.4253	30.3469	28.7244	28.131
FBgn0027657	1.84149	6.59301	21.0626	0.00216038	0.0228287	CG9734	glob1	globin 1	36.4233	40.4357	47.5768	67.6778	126.358	83.3177	242.359
FBgn0038718	1.82186	6.26733	21.0403	0.00216689	0.0228294	CG17752	CG17752		22.4376	23.2812	43.663	64.9341	122.791	102.187	138.491
FBgn0036419	1.13791	3.58659	21.0283	0.00217042	0.0228294	CG13482	CG13482		5.3441	9.74425	7.03256	11.0256	14.7934	17.4698	16.2294
FBgn0038938	2.34812	4.72215	21.3467	0.00217898	0.0228294	CG7084	CG7084		2.5773	13.9454	12.414	11.3304	46.2513	36.2835	52.9296
FBgn0036727	1.12276	4.12698	20.9939	0.00218054	0.0228294	CG7589	CG7589		7.50448	12.0782	15.5939	13.4136	25.9615	20.7174	23.6733
FBgn0033826	1.5336	7.91935	20.9882	0.00218221	0.0228294	CG4734	CG4734		93.1996	95.1669	140.04	230.928	332.296	365.971	382.235
FBgn0035695	2.20173	2.8611	20.9747	0.00218621	0.0228294	CG10226	CG10226		1.55396	1.80881	3.73031	4.77606	9.82329	8.00701	18.0038
FBgn0032435	1.53197	4.36238	20.9746	0.00218624	0.0228294	CG6417	Oatp33Eb	Organic anion transporting polypeptide 33Eb	6.36744	9.5692	13.637	17.8848	30.5808	27.1566	33.5408
FBgn0259173	0.907642	6.70335	20.9546	0.00219217	0.0228316	CG42278	corn	cornetto	67.8814	60.216	87.0203	102.736	128.17	143.902	125.94
FBgn0261261	0.627489	6.17594	20.9375	0.00219724	0.0228434	CG42612	plx	pollux	58.1787	52.1638	63.6599	72.149	78.3524	89.9248	84.8258
FBgn0051116	0.71896	5.67607	20.9074	0.00220624	0.022855	CG31116	ClC-a	Chloride channel-a	32.5573	49.4214	47.7602	38.5133	61.8633	63.2162	59.2049
FBgn0263118	1.04825	2.64199	20.8896	0.00221159	0.0228758	CG5441	tx	taxi	2.91841	4.7846	5.32028	4.77606	7.60135	7.83903	8.91536
FBgn0003356	1.16821	9.96989	20.8656	0.0022188	0.0228758	CG31034	Jon99Cii	Jonah 99Cii	586.714	436.216	817.917	900.44	1345.15	1398.99	1366.17
FBgn0263132	1.44232	7.35934	20.8506	0.00222332	0.0228887	CG43374	Cht6	Chitinase 6	48.1348	122.883	123.59	102.279	260.376	216.861	241.364
FBgn0033304	1.1165	3.65131	20.8371	0.00222742	0.0229026	CG2397	Cyp6a13	Cyp6a13	6.21583	7.93544	12.414	8.43432	14.8519	16.35	19.0425
FBgn0030724	0.69727	7.00702	20.8331	0.00222862	0.0229026	CG9212	Nipsnap	Nipsnap	97.1034	89.332	121.877	118.334	148.636	148.326	162.9
FBgn0034475	0.935225	2.36061	20.7879	0.0022424	0.0229697	CG13874	Obp56h	Odorant-binding protein 56h	3.67644	3.09249	3.85262	4.62363	6.54886	5.37533	7.40062
FBgn0039452	0.878095	3.11591	20.7857	0.00224307	0.0229697	CG14245	CG14245		5.4957	6.94351	5.6872	8.43432	9.76481	10.4707	12.118
FBgn0034718	0.952437	6.3721	20.7217	0.00226275	0.0231099	CG3413	wdp	windpipe	42.1464	76.612	66.6564	63.0541	114.839	93.1724	111.399
FBgn0003091	0.720887	3.8029	20.7023	0.00226877	0.0231103	CG6622	Pkc53E	Protein C kinase 53E	11.1051	14.3538	11.4967	8.84079	18.5941	15.958	15.5802
FBgn0031528	1.75682	2.26862	20.6775	0.00227647	0.0231511	CG15412	CG15412		1.40235	1.40037	3.66916	3.40421	7.36746	7.2231	7.57373
FBgn0035557	1.84987	0.678651	20.6701	0.00227876	0.0231511	CG11353	CG11353		0.303211	0.700186	1.0396	1.01618	2.28041	2.12774	2.76982
FBgn0036934	0.648575	2.8922	20.6625	0.00228116	0.0231552	CG7395	sNPF-R	short neuropeptide F receptor	6.29163	5.07635	7.09371	6.35114	8.82926	8.9029	8.17963
FBgn0037750	0.586011	4.8852	20.6547	0.00228359	0.0231596	CG12946	Whamy	WHAMM and JMY related	21.528	28.8243	25.4395	26.3191	32.335	33.0359	36.3106
FBgn0053510	1.08964	2.09428	20.6299	0.00229137	0.023197	CG33510	CG33510		2.53939	2.509	2.93533	3.86149	5.37942	4.59143	6.70816
FBgn0051792	1.78761	4.42328	20.6256	0.00229271	0.023197	CG31792	CG31792		5.83682	6.53506	16.3889	14.9379	37.6559	29.3404	33.6274
FBgn0038009	1.79654	7.36895	20.57	0.00231029	0.0232877	CG17738	CG17738		58.7851	45.2787	80.6604	150.954	243.536	266.863	268.716
FBgn0011296	0.75639	8.85134	20.5471	0.00231756	0.0233205	CG4533	l(2)efl	lethal (2) essential for life	405.697	286.843	356.642	450.88	575.072	603.157	510.989
FBgn0031002	1.40103	3.23185	20.537	0.0023208	0.0233328	CG14196	CG14196		4.09335	3.79267	9.1729	5.94467	14.7934	13.8303	11.9016
FBgn0035309	1.32437	3.21724	20.5078	0.00233013	0.0233861	CG15879	CG15879		4.20706	4.20111	7.46063	7.67218	12.513	10.7507	15.7534
FBgn0030270	2.51894	1.4744	20.4563	0.00234674	0.0234438	CG15199	CG15199		0.947535	0.291744	0.550374	1.87994	3.68373	3.63955	6.79472
FBgn0265081	1.68291	2.46948	20.4043	0.00236365	0.0234849	CR44192	asRNA:CR44192	antisense RNA:CR44192	1.32655	2.6257	3.4857	4.36959	9.5894	7.2791	8.30946
FBgn0024150	0.730583	4.27011	20.4006	0.00236486	0.0234849	CG10564	Ac78C	Adenylyl cyclase 78C	11.8631	16.9795	15.6551	18.4945	22.3948	23.7411	23.3704
FBgn0037138	0.874613	6.88378	20.39	0.00236834	0.0234849	CG7145	P5CDh1	delta-1-Pyrroline-5-carboxylate dehydrogenase 1	72.6949	78.129	102.308	111.983	150.331	132.76	161.948
FBgn0266261	1.81407	6.98724	20.3426	0.00238394	0.0235932	CG44956	CG44956		47.3768	28.2408	77.7862	101.923	213.949	200.511	186.833
FBgn0259992	1.87223	2.92216	20.3383	0.00238537	0.0235932	CG42489	CG42489		2.5773	1.57542	4.28069	6.24952	13.0392	11.5906	11.339
FBgn0029810	0.714812	2.07535	20.3268	0.00238918	0.0236004	CG12239	CG12239		3.75224	3.09249	2.93533	3.81069	5.14553	4.8714	4.84719
FBgn0262605	1.726	3.9396	20.3238	0.00239018	0.0236004	CG43131	CG43131		5.11669	4.31781	10.029	12.7023	27.5403	20.2135	23.2838
FBgn0262291	1.11817	1.38535	20.2688	0.00240849	0.0236524	CR42998	mir-956	mir-956 stem loop	1.36445	1.69212	2.26265	1.77832	2.86513	3.2476	4.0249
FBgn0085415	1.27803	1.61936	20.2614	0.00241097	0.0236524	CG34386	CG34386		1.62976	1.22532	2.44611	2.48965	4.03456	3.91951	4.58752
FBgn0027571	2.12943	10.1224	20.2573	0.00241234	0.0236524	CG3523	FASN1	Fatty acid synthase 1	166.349	387.844	573.245	776.516	2307.3	1704.6	1584.42
FBgn0040259	1.53207	5.03416	20.2338	0.00242025	0.0236524	CG18578	Ugt302C1	UDP-glycosyltransferase family 302 member C1	12.697	15.4624	20.7919	26.7764	40.0533	35.7236	68.6829
FBgn0034162	1.24837	6.39255	20.2181	0.00242552	0.0236524	CG6426	CG6426		47.2631	33.959	60.1131	80.126	116.008	110.53	123.95
FBgn0032536	1.76356	2.54426	20.1809	0.00243814	0.0236524	CG17988	Ance-3	Ance-3	1.74346	1.75046	3.91377	4.52201	10.5834	6.99913	9.34815
FBgn0028491	1.18186	6.68499	20.1788	0.00243885	0.0236524	CG2930	CG2930		61.5519	47.3792	79.5596	91.05	146.765	109.074	164.978
FBgn0037601	0.971722	4.42706	20.1783	0.00243903	0.0236524	CG9716	Cyp313b1	Cyp313b1	18.9886	10.3277	15.227	19.2567	25.2599	29.0044	28.9533
FBgn0030872	0.829173	4.53283	20.1706	0.00244163	0.0236524	CG6492	Ucp4A	Ucp4A	15.1227	15.6958	19.3242	22.5593	27.8326	25.5888	32.2857
FBgn0036321	1.18454	5.41284	20.1696	0.002442	0.0236524	CG14120	CG14120		17.0177	28.9994	36.5693	32.9243	59.0567	50.5617	64.7879
FBgn0029608	1.67639	3.66693	20.1557	0.00244672	0.0236524	CG3091	CG3091		4.47237	3.85102	8.68368	10.2634	21.6931	14.7822	21.4661
FBgn0035931	2.56111	1.58341	20.1488	0.00244908	0.0236524	CG13312	CG13312		0.492718	0.350093	1.28421	1.82913	5.26247	3.07962	7.01111
FBgn0036547	0.850318	5.77469	20.1482	0.00244928	0.0236524	CG17032	CG17032		43.4729	29.6412	46.5372	51.2664	71.2188	64.0561	69.7649
FBgn0016920	1.87364	1.48479	20.0886	0.00246977	0.0236529	CG11020	nompC	no mechanoreceptor potential C	0.568521	0.933581	1.83458	2.03237	4.20998	4.42345	4.37112
FBgn0032899	1.07729	5.08729	20.078	0.00247346	0.0236529	CG9338	CG9338		19.3297	16.9212	27.0906	33.0768	44.3802	43.7866	47.3466
FBgn0032422	1.9163	4.99711	20.3959	0.00247532	0.0236529	CG6579	atilla	atilla	8.1867	8.28553	18.7739	25.6586	51.4553	48.9939	53.1027
FBgn0033904	2.22394	2.13767	20.0594	0.00247991	0.0236529	CG18327	CG18327		0.492718	1.75046	2.38495	2.48965	6.6658	5.76728	9.30487
FBgn0038072	1.47354	2.45863	20.058	0.00248038	0.0236529	CG6225	CG6225		2.50149	2.10056	4.03608	4.26797	7.77677	5.76728	10.1272
FBgn0038878	1.48603	3.75895	20.0555	0.00248124	0.0236529	CG3301	CG3301		4.20706	8.51892	8.80598	10.4159	20.0559	14.3902	24.6254
FBgn0038105	2.63351	2.50285	20.0527	0.00248222	0.0236529	CG8063	yellow-f2	yellow-f2	0.492718	0.816883	3.11879	2.89612	9.47245	11.1986	9.4347
FBgn0036468	2.40133	3.34636	20.3616	0.00248696	0.0236529	CG13461	CG13461		2.50149	1.40037	3.30224	7.67218	12.1622	22.7332	17.7874
FBgn0266619	0.898469	1.81817	20.0333	0.00248898	0.0236529	CR45126	asRNA:CR45126	antisense RNA:CR45126	1.97087	3.15083	2.56841	2.89612	4.32692	4.47944	4.28457
FBgn0031514	1.56561	4.95463	20.0322	0.00248935	0.0236529	CG3332	OtopLb	Otopetrin-like b	10.9914	10.7362	22.3207	26.3699	47.947	41.4909	49.5106
FBgn0039154	1.31449	5.5422	20	0.00250066	0.023673	CG6164	Npc2f	Niemann-Pick type C-2f	23.3094	17.9131	33.8174	44.0515	66.658	67.3596	63.879
FBgn0032670	1.34316	1.58375	19.9763	0.00250898	0.023673	CG5783	CG5783		1.81927	1.05028	2.2015	2.28641	3.27443	4.36746	4.76063
FBgn0022770	1.45546	6.0544	19.9687	0.00251167	0.023673	CG17058	Peritrophin-A	Peritrophin A	28.1607	22.9311	51.4906	56.6014	97.9405	96.2521	97.4198
FBgn0003357	1.31063	10.7184	19.9516	0.00251773	0.023673	CG31362	Jon99Ciii	Jonah 99Ciii	846.49	649.422	1403.27	1420.78	2346.65	2470.19	2342.23
FBgn0015001	1.65132	5.25069	19.9211	0.00252854	0.023673	CG7754	iotaTry	iotaTrypsin	13.0381	11.7281	25.623	32.5687	65.1962	52.9694	56.0889
FBgn0033446	1.00402	6.11312	19.9177	0.00252976	0.023673	CG1648	CG1648		48.9686	32.9671	55.5266	65.4422	95.3093	83.4856	92.1831
FBgn0030976	1.12677	4.8344	19.9163	0.00253026	0.023673	CG7378	CG7378		17.1314	12.6033	22.3207	27.1321	37.8313	36.9554	40.3788
FBgn0011723	0.835142	1.69269	19.8765	0.00254448	0.0237294	CG7260	byn	brachyenteron	2.7668	2.15891	2.62956	2.33722	4.7947	3.58356	3.419
FBgn0263353	1.61231	1.83313	19.8474	0.00255498	0.0237546	CG11000	CG11000		0.909634	1.80881	2.93533	2.18479	5.73025	4.75941	5.32325
FBgn0036381	0.602591	8.66308	19.7087	0.00260565	0.0240035	CG8745	CG8745		375.755	409.725	325.883	287.834	491.106	503.098	418.806
FBgn0020912	0.59344	3.59685	19.6466	0.00262874	0.0240508	CG1447	Ptx1	Ptx1	8.60362	11.4947	11.6802	9.75536	14.3841	13.9423	13.3298
FBgn0267495	0.850744	2.98783	19.6222	0.00263791	0.0240954	CR45185	asRNA:CR45185	antisense RNA:CR45185	5.3062	8.40223	5.74835	5.18253	11.1681	9.29485	9.0452
FBgn0266448	1.17766	5.5504	19.6084	0.0026431	0.0240954	CG45078	CG45078		30.0937	18.8467	36.8751	41.6127	62.7989	57.3369	71.4527
FBgn0050438	0.754146	3.79715	19.5951	0.00264811	0.0241138	CG30438	Ugt50B3	UDP-glycosyltransferase family 50 member B3	10.0439	9.62755	12.6586	12.5499	16.8399	20.5494	13.2865
FBgn0034387	1.2383	4.00054	19.5317	0.00267218	0.0241884	CG15077	Cyp12b2	Cyp12b2	9.13424	6.47672	11.2521	15.3444	24.032	19.0936	23.1973
FBgn0034628	1.25336	5.62402	19.5276	0.00267376	0.0241884	CG9707	Acox57D-p	acyl-Coenzyme A oxidase at 57D proximal	24.8633	21.7058	39.1377	43.8991	55.3729	71.7831	78.334
FBgn0014073	1.08311	4.14744	19.5003	0.00268425	0.0241884	CG7525	Tie	Tie-like receptor tyrosine kinase	8.60362	9.91929	14.8601	16.6654	22.8041	26.2047	21.8123
FBgn0036985	1.63649	8.92846	19.4973	0.00268537	0.0241884	CG5847	zye	zye	136.521	201.128	369.484	363.539	733.18	925.117	581.1
FBgn0028550	1.79159	5.32866	19.6209	0.00269401	0.0242318	CG11405	Atf3	Activating transcription factor 3	7.65609	19.1968	29.4756	25.5062	63.7929	65.9598	59.5512
FBgn0035734	1.25064	1.23636	19.4481	0.0027044	0.024269	CG14823	CG14823		1.17494	1.05028	1.95689	1.82913	3.7422	2.74366	3.02949
FBgn0037067	1.2446	4.51585	19.4467	0.00270493	0.024269	CG11310	Cpr78Ca	Cuticular protein 78Ca	12.2043	9.39416	16.3889	22.2544	35.9602	31.2441	28.3041
FBgn0031813	1.23704	6.80151	19.3908	0.00272673	0.0243395	CG9527	CG9527		52.9104	55.7814	92.3405	94.505	163.604	119.153	179.995
FBgn0001128	1.63264	7.33772	19.3802	0.00273088	0.0243395	CG9042	Gpdh1	Glycerol-3-phosphate dehydrogenase 1	51.5459	69.9019	107.078	127.836	228.391	173.97	329.349
FBgn0046113	1.73265	4.38227	19.3795	0.00273115	0.0243395	CG4226	GluRIIC	Glutamate receptor IIC	7.42868	5.36809	16.2055	14.633	30.9317	27.3806	37.9985
FBgn0027279	0.718024	7.3871	19.3747	0.00273306	0.0243395	CG14616	l(1)G0196	lethal (1) G0196	107.413	129.009	159.608	154.612	209.973	204.431	189.819
FBgn0029849	1.21517	4.59177	19.3499	0.0027428	0.0244011	CG3774	Efr	ER GDP-fucose transporter	11.8252	10.9696	18.5293	23.0165	32.5689	31.1321	35.748
FBgn0040234	0.676868	4.62431	19.3259	0.00275231	0.0244294	CG12149	c12.2	c12.2	18.0411	20.5388	22.015	21.6955	27.7742	25.1409	34.1467
FBgn0039536	1.42796	2.7199	19.3148	0.00275673	0.0244312	CG18437	unc80	uncoordinated 80	2.23618	3.32588	5.07567	5.23334	8.65385	8.17499	11.3822
FBgn0030997	0.985924	1.11458	19.2856	0.00276835	0.0244563	CG7990	CG7990		1.13704	1.80881	1.77343	1.47347	2.98207	2.63167	2.51015
FBgn0031289	1.61784	0.433867	19.2715	0.00277402	0.0244563	CG13950	CG13950		0.379014	0.525139	0.978443	0.965374	1.69569	1.95976	2.07737
FBgn0250815	1.43384	11.5065	19.2707	0.00277433	0.0244563	CG6467	Jon65Aiv	Jonah 65Aiv	1238.24	1072.68	2143.28	2591.27	4425.8	3904.4	4376.75
FBgn0011288	0.590727	2.92644	19.2629	0.00277745	0.0244652	CG40452	Snap25	Synaptosomal-associated protein 25kDa	6.02632	6.00993	7.33832	6.60519	8.47843	8.39896	9.08848
FBgn0002121	0.669401	8.35708	19.2365	0.00278807	0.0245029	CG2671	l(2)gl	lethal (2) giant larvae	220.207	283.867	304.357	291.441	356.27	401.078	405.909
FBgn0050195	1.11246	0.901645	19.2309	0.00279036	0.0245044	CG30195	CG30195		1.13704	1.05028	1.22305	1.57508	2.57277	1.84777	2.72654
FBgn0052649	0.833776	3.48827	19.2227	0.00279366	0.0245148	CG32649	Coq8	Coenzyme Q8	6.82225	9.5692	8.13331	10.5683	14.2672	11.7585	15.4071
FBgn0053511	1.27924	1.81385	19.1702	0.00281497	0.0246435	CG33511	CG33511		1.78137	2.3923	2.14034	2.64208	3.44984	4.14349	6.66488
FBgn0036191	0.661967	4.10516	19.0713	0.00285573	0.0248313	CG7334	Sugb	Sugar baby	13.0002	13.887	15.1659	15.5984	22.3363	16.35	21.8123
FBgn0031214	0.809082	2.69442	19.0531	0.00286332	0.0248313	CG11374	CG11374		4.35866	5.65983	5.50374	4.82687	6.13955	9.18286	8.30946
FBgn0014859	2.94187	3.40877	19.3377	0.00286851	0.0248313	CG1864	Hr38	Hormone receptor-like in 38	0.416916	1.69212	5.13682	4.31878	21.5761	17.4138	19.6051
FBgn0030615	1.64938	5.42786	19.0362	0.00287037	0.0248313	CG9081	Cyp4s3	Cyp4s3	13.5687	14.0621	35.4074	30.892	75.2534	56.329	65.2206
FBgn0010397	1.12762	6.87549	19.0185	0.00287779	0.0248394	CG10119	LamC	Lamin C	63.4849	55.8981	93.3801	113.558	147.817	166.019	161.818
FBgn0040843	1.6007	3.03742	19.0054	0.0028833	0.02485	CG15213	CG15213		3.22162	2.21725	6.23757	6.55438	12.8638	12.3745	11.6852
FBgn0039156	1.34166	5.62792	18.9219	0.00291871	0.0249609	CG6178	CG6178		21.1111	23.923	36.2635	43.5942	66.775	54.1453	88.8074
FBgn0000037	0.844022	1.78134	18.9007	0.00292778	0.0249917	CG4356	mAChR-A	muscarinic Acetylcholine Receptor, A-type	2.12248	2.80074	3.17994	2.43884	4.26845	3.97551	4.28457
FBgn0004629	0.830831	7.12517	18.8364	0.00295555	0.025081	CG8050	Cys	Cystatin-like	109.421	98.4344	93.3801	138.912	165.008	149.613	203.712
FBgn0025879	0.621475	4.09785	18.8034	0.0029699	0.025166	CG6281	Timp	Tissue inhibitor of metalloproteases	14.7436	16.1626	14.6766	12.7531	17.2492	19.0376	23.0241
FBgn0029828	0.85267	4.52094	18.7015	0.00301486	0.0254169	CG6067	CG6067		14.1372	16.8628	16.817	23.6263	34.2646	27.8285	24.1494
FBgn0087011	1.13795	3.52423	18.6732	0.00302754	0.0254514	CG41520	CG41520		5.11669	6.94351	8.43907	11.178	16.0798	13.6623	16.5757
FBgn0052225	1.05318	0.627987	18.67	0.00302894	0.0254514	CG32225	CG32225		0.833831	0.875232	1.22305	1.27023	1.81263	2.07174	1.90425
FBgn0040723	2.46176	1.65373	18.6645	0.00303142	0.0254514	CG5011	CG5011		0.379014	0.525139	1.1619	2.33722	5.90567	4.19948	5.97243
FBgn0261283	0.70326	7.1163	18.6421	0.0030415	0.0254514	CG8522	SREBP	Sterol regulatory element binding protein	94.9051	105.961	118.942	139.268	154.074	166.467	176.49
FBgn0040827	1.64037	7.86757	18.6367	0.00304392	0.0254514	CG13315	CG13315		71.1409	115.414	103.837	222.442	314.93	323.752	424.042
FBgn0037747	0.788327	4.84373	18.6124	0.00305489	0.0254514	CG8481	Naa80	N(alpha)-acetyltransferase 80	19.0265	18.6133	24.7668	29.2661	35.3171	34.2677	35.8346
FBgn0034638	1.49694	5.06978	18.6118	0.00305515	0.0254514	CG10433	CG10433		13.1139	14.2955	23.7272	27.7418	39.1177	40.091	67.9039
FBgn0016694	1.93119	4.89064	18.8898	0.0030589	0.0254514	CG17888	Pdp1	PAR-domain protein 1	5.4578	11.3197	19.3242	20.1204	47.5962	36.7314	57.9066
FBgn0039941	2.04164	4.50904	18.8853	0.00306087	0.0254514	CG17167	CG17167		3.60063	8.40223	11.1909	17.5292	41.632	30.2922	39.7296
FBgn0003372	2.07923	6.57013	18.8488	0.00307713	0.0254812	CG3047	Sgs1	Salivary gland secretion 1	17.6242	22.9311	66.7787	59.1926	160.505	156.109	154.764
FBgn0038647	1.44191	6.81216	18.5593	0.00307909	0.0254812	CG14302	CG14302		45.6712	41.661	83.9015	99.6875	163.955	144.966	181.51
FBgn0267376	0.705339	4.87895	18.5414	0.00308727	0.0255079	CG6584	SelR	Selenoprotein R	23.2715	22.8727	26.051	24.9981	32.3935	29.4523	42.889
FBgn0030425	1.63326	4.84839	18.5105	0.0031015	0.0255627	CG3775	Nep6	Neprilysin 6	8.22461	10.8529	21.2811	22.9657	50.4613	35.1076	45.3991
FBgn0032797	0.902473	3.08171	18.5044	0.00310431	0.0255627	CG10186	Hasp	Hig-anchoring scaffold protein	5.2683	4.7846	7.82754	7.7738	10.7588	11.0866	10.1272
FBgn0051719	1.58968	2.67687	18.4545	0.00312753	0.0256351	CG31719	RluA-1	RluA pseudouridine synthase 1	1.51606	3.85102	4.15838	4.77606	9.35551	8.063	10.9927
FBgn0000273	0.906062	7.84379	18.4509	0.00312919	0.0256351	CG4379	Pka-C1	Protein kinase, cAMP-dependent, catalytic subunit 1	117.798	180.531	216.297	186.927	297.915	277.39	300.136
FBgn0040384	0.89894	5.81881	18.4189	0.00314418	0.0256922	CG32795	CG32795		37.295	33.4922	45.253	56.6522	71.979	62.1523	79.7622
FBgn0050022	0.722247	4.24456	18.3337	0.00318452	0.0257945	CG30022	CG30022		15.009	13.0118	16.817	17.2243	20.4067	20.4935	26.8759
FBgn0001078	1.58188	3.68784	18.3318	0.00318546	0.0257945	CG4059	ftz-f1	ftz transcription factor 1	2.95631	7.70204	9.78443	8.63755	19.8805	16.9659	20.8169
FBgn0026565	1.53027	4.61954	18.3052	0.00319819	0.0257945	CG1315	Ass	Argininosuccinate synthase	8.67942	9.4525	15.8997	22.7117	39.7609	28.9484	40.3788
FBgn0267073	1.11749	2.00157	18.3009	0.00320026	0.0257945	CR45517	lncRNA:CR45517	long non-coding RNA:CR45517	1.70556	2.74239	2.99648	3.55664	5.73025	4.92739	5.19342
FBgn0027291	1.00745	7.2038	18.3005	0.00320043	0.0257945	CG12233	Idh3a	Isocitrate dehydrogenase 3a	91.2287	82.2718	132.885	125.295	190.735	155.101	229.636
FBgn0038076	1.32254	0.631134	18.28	0.00321032	0.0258389	CG6802	Cyp313a4	Cyp313a4	0.947535	0.991929	0.550374	1.21942	1.57874	2.12774	2.46687
FBgn0050047	1.78427	4.2706	18.3964	0.00321703	0.0258437	CG30047	CG30047		4.69977	6.00993	14.3709	14.2774	32.6858	27.1566	30.5546
FBgn0029851	1.27715	2.07815	18.266	0.00321708	0.0258437	CG14445	CG14445		2.42569	1.63377	3.05763	3.65826	4.7947	5.59931	6.92455
FBgn0027356	1.07877	6.59099	18.2606	0.00321972	0.0258469	CG8604	Amph	Amphiphysin	54.2748	52.689	80.3546	86.4263	122.733	103.251	157.274
FBgn0052633	1.31612	5.92104	18.2138	0.00324248	0.0259506	CG32633	CG32633		24.1432	31.3917	40.7888	58.4813	95.0754	68.5915	92.9621
FBgn0031855	1.36831	4.23989	18.211	0.00324383	0.0259506	CG11221	meng	meng-po	7.9972	7.64369	13.9428	17.4275	23.8566	25.5888	31.2038
FBgn0035325	1.30678	2.46287	18.206	0.00324627	0.0259523	CG13806	CG13806		3.14582	2.15891	3.30224	5.33496	7.95218	6.38321	8.61241
FBgn0036717	1.59876	7.02509	18.1998	0.0032493	0.0259586	CG13731	CG13731		32.8226	66.751	106.344	85.715	223.655	223.86	146.454
FBgn0003076	1.06049	7.70121	18.1808	0.00325866	0.0259618	CG5165	Pgm1	Phosphoglucose mutase 1	124.355	109.054	182.602	179.864	262.714	228.956	332.552
FBgn0036978	1.94095	2.54618	18.1684	0.00326472	0.0259669	CG5528	Toll-9	Toll-9	0.985437	1.98386	3.60801	4.36959	9.47245	8.56694	9.82421
FBgn0031990	0.668679	7.06307	18.128	0.00328474	0.0259909	CG8552	PAPLA1	Phosphatidic Acid Phospholipase A1	85.2782	122.824	127.198	113.254	163.838	156.445	154.504
FBgn0034507	1.03242	2.72233	18.1109	0.00329325	0.026005	CG11192	CG11192		3.22162	5.77653	4.58645	5.38577	10.4665	9.07087	6.40521
FBgn0266414	1.53653	3.68325	18.0929	0.00330224	0.0260487	CR45054	lncRNA:CR45054	long non-coding RNA:CR45054	5.64731	3.73432	8.25561	11.8385	20.6406	16.518	19.8648
FBgn0014031	1.30431	5.12268	18.0908	0.00330327	0.0260487	CG3926	Spat	Serine pyruvate aminotransferase	18.5338	13.8287	28.8029	28.3007	39.3516	44.6825	62.321
FBgn0032166	0.737471	4.01558	18.0782	0.00330957	0.0260806	CG4619	CG4619		10.2713	11.5531	16.022	14.7347	20.2313	19.7096	18.4799
FBgn0015572	2.00445	5.24134	18.3348	0.00331779	0.0261276	CG1082	alpha-Est4	alpha-Esterase-4	8.83103	8.22718	24.5834	27.2845	55.6653	58.7927	69.8947
FBgn0260026	1.1007	2.13984	18.0511	0.00332321	0.0261525	CG42494	CG42494		2.691	2.04221	3.05763	4.36959	6.02261	5.76728	5.6262
FBgn0034229	2.50916	6.82858	18.293	0.00333841	0.026201	CG4847	CG4847		13.0002	25.7318	44.8249	73.9781	194.419	126.992	273.606
FBgn0032729	0.708012	5.87681	17.9991	0.00334959	0.026271	CG10639	L2HGDH	L-2-hydroxyglutarate dehydrogenase	44.4963	42.828	53.264	53.4512	67.5351	59.7446	82.6619
FBgn0026061	2.3208	5.21052	18.2182	0.00337569	0.0263337	CG4123	Mipp1	Multiple inositol polyphosphate phosphatase 1	6.40534	5.95158	18.407	26.1667	60.9278	54.6492	74.0062
FBgn0016684	0.757882	4.79635	17.9459	0.00337681	0.0263337	CG10207	NaPi-T	Na[+]-dependent inorganic phosphate cotransporter	21.6417	18.3215	20.5473	29.3169	30.8732	33.6518	36.3972
FBgn0031004	1.41581	5.00106	17.9049	0.00339796	0.0263833	CG7992	CG7992		12.1664	13.0118	22.015	30.8411	46.3682	43.3386	49.1211
FBgn0033876	0.654727	2.44789	17.8866	0.00340748	0.0263833	CG10808	Syngr	Synaptogyrin	3.90385	5.36809	4.46415	4.4204	6.2565	7.05512	5.71276
FBgn0004244	0.949542	3.85305	17.8782	0.00341189	0.0263833	CG10537	Rdl	Resistant to dieldrin	6.78435	11.0279	13.0255	12.3466	19.822	19.3176	16.4891
FBgn0035439	1.19407	1.45998	17.8765	0.00341277	0.0263833	CG14961	CG14961		1.78137	1.98386	2.3238	1.16861	2.9236	4.8714	3.24588
FBgn0035043	0.760225	4.57549	17.8506	0.00342632	0.0263833	CG4781	CG4781		17.6242	14.6455	21.3423	23.3214	28.8267	26.9327	30.8575
FBgn0260657	0.612593	3.09056	17.8388	0.00343251	0.0263857	CG42540	CG42540		7.01176	6.24332	7.09371	8.53594	9.9987	9.18286	10.1704
FBgn0030837	1.10087	6.79425	17.8172	0.00344387	0.0264229	CG8661	CG8661		75.348	47.9627	85.0634	104.006	134.661	140.431	169.911
FBgn0031695	1.71615	3.026	17.8032	0.00345124	0.0264595	CG14031	Cyp4ac3	Cyp4ac3	3.22162	1.75046	6.17642	5.94467	13.1562	10.7507	13.4596
FBgn0000406	2.32969	6.53932	18.0563	0.00345825	0.0264957	CG13279	Cyt-b5-r	Cytochrome b5-related	16.0702	23.748	41.8284	60.9202	115.424	99.2197	257.42
FBgn0053517	0.849347	2.31748	17.7497	0.00347969	0.0265547	CG33517	Dop2R	Dopamine 2-like receptor	2.7668	4.37616	4.15838	4.06473	6.02261	5.76728	6.53505
FBgn0062412	0.891669	7.99626	17.7208	0.00349521	0.0265895	CG7459	Ctr1B	Copper transporter 1B	136.18	221.9	221.006	205.929	322.941	278.397	365.097
FBgn0033110	1.11717	1.29796	17.715	0.00349833	0.0265919	CG9447	CG9447		1.17494	1.34202	1.95689	2.18479	3.09901	3.52756	2.98621
FBgn0034988	1.0605	3.57758	17.6928	0.00351028	0.0266653	CG3362	cN-IIIB	cytosolic 5'-nucleotidase IIIB	6.44324	6.30167	10.1513	11.0764	15.3781	13.6623	17.9606
FBgn0262562	1.20914	4.91895	17.6714	0.00352188	0.0267085	CG43102	CG43102		10.3092	25.6735	23.1769	22.0512	40.6965	43.0027	41.2444
FBgn0031219	1.4879	2.01651	17.6653	0.00352519	0.0267085	CG13694	CG13694		1.85717	1.40037	3.17994	2.94693	4.44387	5.15136	7.74684
FBgn0262511	0.733357	8.04234	17.6169	0.00355163	0.0267824	CG8048	Vha44	Vacuolar H[+] ATPase 44kD subunit	203.379	163.785	242.96	252.42	322.063	306.618	325.67
FBgn0262529	1.20082	3.84944	17.6136	0.00355342	0.0267824	CG43083	CG43083		6.63275	6.82681	11.2521	13.9217	22.9795	19.2056	17.2248
FBgn0051098	1.11951	4.78268	17.6038	0.00355885	0.0268058	CG31098	CG31098		13.8719	14.1204	21.8927	26.7256	34.8493	33.6518	42.1099
FBgn0030251	0.873049	6.46498	17.5824	0.00357064	0.0268075	CG2145	CG2145		54.578	52.9807	84.8188	80.7357	106.828	108.347	117.804
FBgn0266577	1.54197	-0.0799165	17.572	0.00357639	0.0268167	CR45108	asRNA:CR45108	antisense RNA:CR45108	0.303211	0.408442	0.856137	0.457282	1.40333	1.28784	1.16852
FBgn0035359	0.783338	6.03743	17.5676	0.0035788	0.0268167	CG1143	CG1143		46.4671	40.9025	53.692	69.4053	82.0946	79.3422	79.9353
FBgn0038753	1.21898	1.35901	17.4899	0.00362221	0.0269677	CG4459	CG4459		1.36445	1.45872	1.46766	2.33722	3.27443	2.63167	4.28457
FBgn0015324	0.773122	9.7518	17.4624	0.00363773	0.0269793	CG1088	Vha26	Vacuolar H[+]-ATPase 26kD subunit	617.566	540.602	788.503	830.628	1040.68	1013.75	1103.86
FBgn0265045	1.13858	7.74793	17.4368	0.00365224	0.0270679	CG44162	Strn-Mlck	Stretchin-Mlck	94.0713	138.695	194.037	168.178	324.636	226.604	320.001
FBgn0037012	0.884938	4.63251	17.4197	0.00366199	0.0270679	CG4786	Rcd2	Reduction in Cnn dots 2	16.4492	17.2712	17.612	24.8965	23.5057	35.8356	34.19
FBgn0037174	1.3417	1.32998	17.4088	0.00366821	0.0270704	CG14457	CG14457		1.02334	1.10863	1.95689	2.08317	3.27443	3.02362	4.0249
FBgn0039107	1.19741	3.18848	17.4038	0.00367104	0.0270704	CG10300	CG10300		4.09335	4.84295	6.11527	9.34888	13.5655	13.6623	10.257
FBgn0040309	0.738835	6.91495	17.3874	0.00368048	0.0271055	CG1633	Jafrac1	thioredoxin peroxidase 1	87.5902	106.253	114.355	86.3247	152.144	117.641	166.189
FBgn0015714	1.83889	3.62444	17.4295	0.0036831	0.0271076	CG10241	Cyp6a17	Cytochrome P450-6a17	3.63854	6.53506	5.62605	8.68836	17.7755	9.51882	30.0353
FBgn0040212	0.644919	4.31923	17.3585	0.0036971	0.0271589	CG4625	Dhap-at	Dihydroxyacetone phosphate acyltransferase	13.0381	18.3215	17.8566	18.1389	23.3888	21.6133	24.8851
FBgn0039671	0.810387	5.50244	17.3428	0.00370619	0.0271913	CG11470	CG11470		38.811	24.1564	36.7528	44.0515	58.9397	55.2091	53.8384
FBgn0030748	0.640392	4.98316	17.3285	0.00371445	0.027203	CG4394	Traf-like	TNF-receptor-associated factor-like	23.8779	21.6474	29.9037	31.5017	36.7204	38.5792	35.7913
FBgn0034394	0.610158	5.09888	17.2928	0.00373525	0.027279	CG15096	CG15096		29.6768	35.4177	25.4395	27.0813	33.6214	42.4427	42.8457
FBgn0011676	1.19109	0.59607	17.2752	0.00374558	0.027279	CG6713	Nos	Nitric oxide synthase	1.36445	0.816883	1.0396	0.60971	1.98805	2.18373	1.73114
FBgn0036225	1.93054	5.12599	17.5129	0.00375496	0.027279	CG5883	CG5883		8.52782	9.10241	22.0761	26.4208	65.0793	38.5232	64.182
FBgn0032224	0.849568	4.38421	17.2581	0.00375563	0.027279	CG5025	Sps2	Selenophosphate synthetase 2	16.5629	11.2613	17.1839	20.0188	23.6811	25.0289	29.0831
FBgn0000533	1.07803	4.19423	17.2575	0.00375601	0.027279	CG4920	ea	easter	11.7873	8.75232	12.7198	18.5453	25.1429	20.1575	27.352
FBgn0038606	1.22667	2.07207	17.2081	0.00378528	0.0273731	CG15803	CG15803		1.89507	2.04221	4.09723	2.99774	6.31497	5.15136	5.66948
FBgn0024232	0.829296	2.42651	17.2009	0.00378954	0.0273867	CG18471	gprs	gprs	3.10792	4.25946	4.46415	4.87768	7.54288	6.83115	5.45309
FBgn0029827	1.34643	0.932676	17.1655	0.00381072	0.0274556	CG6048	CG6048		0.79593	1.22532	1.40651	1.21942	3.09901	1.6238	3.02949
FBgn0028886	0.667803	6.11997	17.1505	0.00381974	0.0274556	CG15279	CG15279		59.2778	49.3631	54.8539	69.8626	68.9969	96.476	81.3202
FBgn0259736	0.614362	6.80276	17.1476	0.00382146	0.0274556	CG42390	CG42390		93.0101	118.04	97.4162	74.7911	136.006	134.943	119.189
FBgn0023535	1.54308	4.20285	17.1157	0.00384076	0.0275678	CG18104	arg	arginase	6.59485	7.0602	12.414	16.1573	24.4997	20.8854	36.0077
FBgn0032850	2.09901	3.93703	17.36	0.00384422	0.027571	CG10723	Kua	Kua	3.44903	2.509	10.8852	9.70455	26.8386	23.4051	25.5776
FBgn0052405	2.64101	5.94205	17.3231	0.00386619	0.027699	CG32405	Cpr65Av	Cuticular protein 65Av	5.23039	10.211	38.5873	25.0997	141.327	94.5163	95.3425
FBgn0015568	0.681949	6.2818	17.0644	0.003872	0.0277234	CG1031	alpha-Est1	alpha-Esterase-1	59.8842	51.2886	68.0018	80.2276	89.1697	93.3964	94.4336
FBgn0039091	1.91564	6.74312	17.2259	0.00388664	0.027811	CG10182	CG10182		19.3676	62.4916	64.7607	58.5829	144.718	117.417	248.332
FBgn0039754	0.755609	3.40713	17.0254	0.00389598	0.0278122	CG9747	CG9747		6.44324	8.34388	9.47866	9.90778	11.9867	12.1505	14.1088
FBgn0053012	0.644005	5.49461	17.0125	0.00390394	0.0278147	CG33012	CG33012		36.3096	33.1421	41.8284	41.2062	45.6666	50.8977	61.3256
FBgn0266633	1.30345	0.303687	16.9816	0.00392311	0.0278839	CR45140	asRNA:CR45140	antisense RNA:CR45140	0.492718	0.583488	1.10075	0.812946	1.52027	1.73578	1.6013
FBgn0038242	3.47452	1.31848	16.9805	0.00392385	0.0278839	CG14852	CG14852		0.113704	0.0583488	0.183458	1.52427	3.80068	6.55119	3.89506
FBgn0037090	2.0519	3.67457	17.2023	0.00393918	0.0278839	CG7529	Est-Q	Esterase Q	3.03211	2.3923	6.78795	10.4159	21.4007	17.4698	23.5868
FBgn0030836	1.51306	8.52712	16.932	0.00395418	0.0278839	CG8664	CG8664		202.242	99.2513	251.399	308.92	471.752	501.194	660.256
FBgn0042101	2.28432	2.14256	16.903	0.00397249	0.0279399	CG18744	CG18744		0.341113	2.15891	2.2015	2.2356	6.78275	5.59931	9.60782
FBgn0032033	0.708115	1.83281	16.8997	0.00397454	0.0279399	CG13392	CG13392		2.5773	3.20918	2.87418	2.84531	4.03456	3.80753	4.58752
FBgn0050289	0.702626	3.08097	16.8671	0.00399525	0.0279987	CG30289	CG30289		7.61818	6.00993	7.58293	6.55438	9.12162	8.8469	11.9016
FBgn0036368	0.84878	2.39719	16.8609	0.00399924	0.0279987	CG10738	CG10738		2.84261	4.84295	4.15838	4.4204	7.13358	6.60718	5.75604
FBgn0263346	0.662814	7.17093	16.8454	0.00400911	0.028013	CG43427	smash	smallish	92.2141	133.035	141.507	117.725	174.363	178.562	158.442
FBgn0262808	0.977441	3.19013	16.8316	0.00401799	0.0280484	CG43179	CG43179		4.28286	9.04406	6.29873	7.31652	12.9223	11.4226	10.9062
FBgn0036563	0.732887	5.69924	16.83	0.00401901	0.0280484	CG13075	CG13075		40.744	36.643	39.0766	53.4512	58.4719	55.9931	72.6645
FBgn0261836	1.17638	12.1991	16.826	0.00402159	0.0280495	CG42768	Msp300	Muscle-specific protein 300 kDa	1801.87	3250.73	4057.54	3694.43	6310.58	5677.14	7259.36
FBgn0039915	0.614052	2.99809	16.7678	0.00405919	0.0280752	CG1732	Gat	GABA transporter	6.32954	5.95158	6.54334	8.23108	9.5894	8.79091	9.17503
FBgn0034381	1.46191	0.401897	16.7371	0.00407923	0.0281476	CG15088	List	Lithium-inducible SLC6 transporter	0.492718	0.583488	0.611527	1.27023	1.92957	1.73578	1.77442
FBgn0051464	1.36009	2.43969	16.7291	0.0040845	0.0281476	CG31464	CG31464		2.46359	1.98386	3.66916	5.28415	7.54288	7.2791	8.09307
FBgn0039818	0.596117	4.25364	16.7072	0.00409886	0.0281476	CG11318	CG11318		12.6591	18.2632	16.8781	17.7324	21.2838	22.6772	21.8989
FBgn0041156	0.840169	1.92061	16.699	0.00410425	0.0281476	CG8254	exex	extra-extra	2.46359	3.55928	3.3634	2.28641	5.02859	4.64742	4.19801
FBgn0033033	1.66945	5.99435	16.7931	0.00410882	0.0281476	CG11066	scaf	scarface	13.4929	34.4258	40.9111	49.0816	115.424	75.7586	101.272
FBgn0261859	0.612388	4.27473	16.6913	0.00410938	0.0281476	CG42788	CG42788		13.0002	20.1303	17.1839	15.8525	22.5117	22.6212	22.072
FBgn0050411	1.99103	2.25578	16.6808	0.00411631	0.0281476	CG30411	CG30411		1.40235	1.05028	1.65112	4.52201	8.5369	6.21523	8.17963
FBgn0267461	1.27759	1.48367	16.678	0.00411813	0.0281476	CR45811	lncRNA:CR45811	long non-coding RNA:CR45811	1.78137	1.80881	2.14034	1.37185	2.51429	5.82328	3.15933
FBgn0029762	0.721883	4.46445	16.6709	0.00412286	0.0281476	CG3252	NAAT1	Nutrient Amino Acid Transporter 1	14.4783	17.6797	23.5438	16.6654	28.8851	24.6369	25.8805
FBgn0039789	0.684561	5.31313	16.6569	0.00413219	0.0281601	CG9717	CG9717		30.5864	44.4618	26.4791	31.2476	49.6427	46.4182	45.6155
FBgn0002533	1.35818	9.88229	16.583	0.00418168	0.0282693	CG8697	Lcp2	Larval cuticle protein 2	467.969	315.667	735.116	848.462	1461.51	1451.56	1155.49
FBgn0026409	0.747399	8.52852	16.5322	0.00421618	0.028354	CG4994	Mpcp2	Mitochondrial phosphate carrier protein 2	268.418	265.954	321.113	346.722	421.466	382.824	532.715
FBgn0004169	1.2362	9.62553	16.5245	0.00422146	0.028354	CG7107	up	upheld	402.816	329.029	720.745	641.262	1217.39	894.153	1174.58
FBgn0002578	1.88902	5.72051	16.7476	0.00423027	0.028354	CG8342	Kaz-m1	Kazal-type protease inhibitor m1	13.8719	12.1949	31.7994	44.1023	83.264	75.4226	93.3516
FBgn0039323	0.990679	3.7846	16.4953	0.00424146	0.0283568	CG10559	CG10559		8.64152	7.00186	11.1909	13.566	14.7349	19.5976	19.0858
FBgn0037517	1.06866	4.02431	16.4919	0.00424384	0.0283568	CG10086	CG10086		9.17214	7.70204	12.9032	16.4114	20.2898	21.2214	22.9809
FBgn0035397	0.649447	7.71571	16.4675	0.00426063	0.0283568	CG11486	CG11486		139.629	171.079	206.146	193.075	243.536	272.518	227.255
FBgn0033224	0.608239	6.54089	16.4336	0.00428419	0.0284293	CG1553	Nop17l	Nop17 like	74.0215	80.638	96.2543	68.7956	94.4322	120.833	108.802
FBgn0266227	1.05656	1.87616	16.4245	0.00429054	0.0284293	CR44922	lncRNA:CR44922	long non-coding RNA:CR44922	1.74346	2.3923	3.30224	2.89612	5.08706	3.97551	5.15014
FBgn0086758	1.09721	6.94502	16.4231	0.00429147	0.0284293	CG31666	chinmo	Chronologically inappropriate morphogenesis	51.6217	77.4872	114.172	103.6	157.816	161.876	174.888
FBgn0031971	0.808365	7.71462	16.4201	0.00429361	0.0284293	CG7224	Sirup	Starvation-upregulated protein	155.964	138.987	167.986	204.761	214.241	248.833	311.562
FBgn0039464	1.74865	5.61065	16.6465	0.00429876	0.0284425	CG6330	CG6330		9.47535	21.1223	31.5548	39.3771	80.1066	75.8146	72.3616
FBgn0025692	1.14056	5.14633	16.3726	0.00432694	0.028553	CG3814	Lfg	Lifeguard	17.0177	19.6635	27.7022	33.3816	47.0699	37.2354	58.5558
FBgn0032085	1.58231	2.86252	16.3654	0.004332	0.0285646	CG9555	CG9555		2.50149	3.50093	3.66916	6.60519	11.402	6.66317	14.1088
FBgn0010434	0.594614	7.74038	16.3225	0.0043625	0.0286408	CG11949	cora	coracle	146.489	202.004	207.919	181.338	241.372	260.816	239.719
FBgn0052241	3.42126	4.10901	16.5409	0.0043717	0.0286408	CG32241	CG32241		0.227408	1.75046	6.72679	5.38577	46.836	23.1811	29.8621
FBgn0033917	0.733425	3.67898	16.3075	0.00437321	0.0286408	CG8503	SmydA-1	SET and MYND domain containing, arthropod-specific,	9.28585	9.39416	12.5363	10.4667	15.729	12.4305	17.7009
FBgn0051005	0.879739	3.41726	16.2962	0.00438127	0.0286769	CG31005	qless	qless	6.67065	8.34388	7.33832	10.4159	13.624	10.4147	15.8399
FBgn0037698	0.991128	2.9925	16.2814	0.00439187	0.0286769	CG16779	CG16779		3.79014	5.60148	6.29873	7.57056	9.76481	9.40683	11.4688
FBgn0051321	2.06053	4.70835	16.4882	0.00440877	0.0286781	CG31321	CG31321		4.66187	6.24332	15.4105	19.9172	43.3277	35.2196	49.8135
FBgn0040507	0.964748	3.99534	16.2575	0.00440909	0.0286781	CG5712	ACXD	Adenylyl cyclase X D	7.35287	11.8448	15.227	12.9563	18.5941	21.8933	20.9901
FBgn0036211	0.797334	5.53017	16.2514	0.00441354	0.0286781	CG5946	CG5946		33.7323	30.2247	37.1808	46.1347	52.2739	49.2179	68.0337
FBgn0036560	1.21636	0.655355	16.2392	0.00442235	0.0287192	CG5895	CG5895		0.871732	0.700186	0.978443	1.42266	2.22193	1.6238	2.29376
FBgn0039297	1.02508	4.8019	16.2083	0.00444482	0.0287211	CG11852	CG11852		17.3588	12.8951	22.3207	28.2499	34.2646	38.4672	36.9598
FBgn0013342	0.641797	4.12052	16.1927	0.00445627	0.0287234	CG17248	nSyb	neuronal Synaptobrevin	11.7873	16.9795	17.0616	12.9563	21.2253	22.0613	17.8307
FBgn0051821	1.4543	4.06726	16.1874	0.00446015	0.0287234	CG31821	CG31821		7.01176	5.95158	12.1082	14.9887	24.909	17.9178	29.9487
FBgn0037715	1.6077	3.17243	16.1378	0.00449671	0.0288562	CG9399	CG9399		2.88051	3.44258	5.56489	8.07865	13.9163	9.18286	17.1383
FBgn0032075	0.783153	7.60346	16.1286	0.00450349	0.0288562	CG9496	Tsp29Fb	Tetraspanin 29Fb	131.594	129.884	162.299	199.985	233.946	216.077	263.22
FBgn0038416	0.881773	3.48544	16.1256	0.00450573	0.0288562	CG17930	CG17930		5.91262	8.98571	8.62253	10.8223	13.1562	12.8784	15.8832
FBgn0262736	0.713326	10.981	16.1224	0.00450816	0.0288562	CG3161	Vha16-1	Vacuolar H[+] ATPase 16kD subunit 1	1460	1369.56	1877.75	1957.22	2336.07	2332.56	2597.36
FBgn0265416	0.66581	2.71707	16.1182	0.00451127	0.0288602	CG44328	Neto	Neuropilin and tolloid-like	4.73768	6.53506	5.13682	5.43658	8.30302	6.60718	8.04979
FBgn0032088	2.02064	5.11912	16.3019	0.00454282	0.0288641	CG13102	CG13102		5.72311	10.8529	18.2235	27.9958	48.1809	51.3456	69.8514
FBgn0037743	0.800903	5.06647	16.0323	0.0045757	0.0289242	CG8412	CG8412		23.3852	21.0056	28.1302	33.9913	39.0008	36.9554	47.1735
FBgn0004575	0.635192	4.1447	16.0274	0.00457942	0.0289242	CG3985	Syn	Synapsin	11.5978	14.4705	17.5508	16.2081	19.705	21.2774	20.8169
FBgn0023197	1.48955	9.49319	16.0274	0.00457943	0.0289242	CG6298	Jon74E	Jonah 74E	253.485	253.059	567.68	624.19	1000.81	1027.08	1155.79
FBgn0004507	1.26349	9.75361	16.0246	0.00458156	0.0289242	CG7254	GlyP	Glycogen phosphorylase	435.866	343.266	793.334	687.956	1220.6	1007.2	1381.88
FBgn0033775	0.97812	4.05616	16.0186	0.00458616	0.0289242	CG17577	Cyp9h1	Cyp9h1	10.006	8.40223	13.2701	17.3767	21.927	22.4532	20.1678
FBgn0015577	0.688815	6.29211	16.0097	0.00459293	0.0289355	CG1128	alpha-Est9	alpha-Esterase-9	72.1643	47.9044	61.8254	79.0082	90.69	96.42	92.7025
FBgn0032209	0.663892	2.52311	15.9976	0.00460209	0.0289617	CG18144	Hand	Hand	4.05545	5.19304	4.5253	5.28415	7.89371	6.15924	6.05898
FBgn0040795	1.02243	-0.0273096	15.9661	0.00462623	0.0290348	CG13038	CG13038		0.568521	0.525139	0.794985	0.711328	1.11097	1.17585	1.2118
FBgn0004652	1.97053	6.04706	16.1643	0.00464525	0.0290475	CG14307	fru	fruitless	12.2422	17.4463	47.5768	45.3726	103.846	97.3719	119.535
FBgn0042119	3.05253	4.25751	16.1636	0.0046458	0.0290475	CG18778	Cpr65Au	Cuticular protein 65Au	0.568521	2.56735	7.94985	8.3327	34.0307	26.9887	45.2693
FBgn0262515	0.632864	8.55368	15.9349	0.0046503	0.02906	CG8029	VhaAC45	Vacuolar H[+] ATPase AC45 accessory subunit	329.742	248.741	337.869	362.168	429.184	423.028	464.854
FBgn0038405	1.44379	2.10656	15.8922	0.00468349	0.0292044	CG8927	CG8927		2.00877	1.69212	2.62956	3.86149	6.43191	3.97551	7.91996
FBgn0003137	0.692034	8.48594	15.8789	0.00469383	0.0292184	CG33103	Ppn	Papilin	224.528	331.246	323.62	313.086	421.29	395.535	462.69
FBgn0039081	0.828777	5.96598	15.8729	0.00469855	0.0292184	CG4370	Irk2	Inwardly rectifying potassium channel 2	34.6419	44.9869	58.6454	58.3797	80.282	70.4953	81.6665
FBgn0052694	1.40703	1.91242	15.8727	0.00469869	0.0292184	CG32694	CG32694		1.25075	2.85909	2.56841	2.43884	5.90567	3.41558	6.53505
FBgn0263220	1.42319	2.09373	15.8553	0.00471235	0.0292297	CG43388	Hk	Hyperkinetic	1.28865	2.21725	3.60801	3.15017	6.2565	4.92739	6.96783
FBgn0030558	1.96216	5.83227	16.0613	0.0047239	0.0292297	CG1461	CG1461		12.8865	13.2452	33.9397	46.0331	88.3511	75.8706	111.053
FBgn0013263	0.676636	3.67492	15.8403	0.00472419	0.0292297	CG33261	Trl	Trithorax-like	7.65609	11.4947	11.8025	11.5337	15.2027	15.902	14.1088
FBgn0030087	0.932991	6.46676	15.8169	0.00474271	0.0293057	CG7766	CG7766		43.0181	68.7932	82.4338	72.7587	113.728	98.4358	126.46
FBgn0031170	1.8398	7.92882	15.8085	0.00474937	0.0293229	CG1718	ABCA	ATP binding cassette subfamily A	49.992	75.0949	166.947	191.246	422.109	335.622	399.806
FBgn0032021	0.791638	2.58373	15.7954	0.00475974	0.0293229	CG7781	CG7781		3.71434	4.14276	5.99296	5.08091	6.95816	8.11899	6.75144
FBgn0038115	1.01882	6.38703	15.7937	0.00476108	0.0293229	CG7966	CG7966		37.5982	62.1415	66.4118	77.5856	111.389	92.2206	124.426
FBgn0086367	1.0078	2.88948	15.7675	0.00478206	0.0294078	CG12120	t	tan	6.02632	3.20918	5.13682	7.06247	10.5834	8.8469	9.34815
FBgn0028424	1.74677	5.73746	15.9449	0.00481475	0.0295149	CG3767	JhI-26	Juvenile hormone-inducible protein 26	17.0556	15.1707	36.7528	41.9684	70.6926	61.3684	114.385
FBgn0034262	1.4395	3.03546	15.6993	0.00483712	0.029605	CG14485	swi2	swi2	2.38779	3.85102	6.48218	6.96085	12.0452	10.4707	12.897
FBgn0038508	3.06918	3.28906	15.8812	0.00486549	0.0296985	CG5866	CG5866		0.189507	4.20111	4.15838	1.47347	25.8446	16.7419	12.4642
FBgn0037069	3.31003	2.92389	15.8702	0.00487432	0.0296985	CG7658	Cpr78Cc	Cuticular protein 78Cc	0.113704	0.700186	1.95689	3.81069	18.7695	9.29485	15.1042
FBgn0035785	1.59626	0.25766	15.6472	0.00487971	0.0296985	CG8546	ppk26	pickpocket 26	0.79593	0.233395	0.489221	0.914565	1.69569	1.45582	1.86097
FBgn0265551	1.18043	3.51661	15.6444	0.00488199	0.0296985	CR44401	lncRNA:CR44401	long non-coding RNA:CR44401	5.57151	5.83488	11.3744	8.18027	12.9223	13.9423	19.4753
FBgn0029766	1.11071	7.52069	15.6378	0.0048874	0.0296985	CG15784	CG15784		109.573	114.947	124.018	166.705	180.62	205.998	346.963
FBgn0010100	0.808581	8.71833	15.6368	0.00488827	0.0296985	CG9244	mAcon1	Mitochondrial aconitase 1	278.272	293.845	397.554	368.468	490.404	439.657	623.21
FBgn0026760	1.05741	3.69911	15.6238	0.00489895	0.0297024	CG7121	Tehao	Tehao	6.36744	6.88516	11.0075	12.7531	16.8984	16.07	18.2635
FBgn0034479	1.29062	3.39475	15.611	0.0049096	0.0297024	CG8654	CG8654		5.00299	6.24332	7.15486	8.68836	20.4067	8.17499	15.4071
FBgn0004513	0.669334	3.6501	15.6061	0.00491364	0.0297024	CG10181	Mdr65	Multi drug resistance 65	9.28585	8.46058	11.9248	12.1434	14.3256	13.9983	15.8399
FBgn0036601	1.41268	2.63779	15.6033	0.00491594	0.0297024	CG13063	CG13063		2.46359	2.10056	4.95337	5.5382	9.41398	8.28697	9.00192
FBgn0034436	1.05207	6.70063	15.6016	0.00491733	0.0297024	CG11961	CG11961		57.1932	56.8901	86.5922	97.96	128.287	112.154	170.041
FBgn0030481	0.671691	4.18039	15.5988	0.00491966	0.0297024	CG1662	CG1662		13.3034	13.0118	16.6335	17.5292	22.3363	18.0858	23.5002
FBgn0001098	1.32505	8.68267	15.5463	0.00496352	0.0298584	CG5320	Gdh	Glutamate dehydrogenase	164.757	196.577	298.425	386.302	543.204	463.958	732.142
FBgn0030776	1.91158	5.86176	15.7505	0.00497166	0.0298763	CG4653	CG4653		13.3792	15.1707	34.3066	48.3195	105.834	67.3596	105.643
FBgn0028325	0.815419	6.66474	15.529	0.00497815	0.0298998	CG7010	Pdha	Pyruvate dehydrogenase E1 alpha subunit	67.1613	67.3345	92.7686	93.9461	125.949	101.963	146.93
FBgn0260764	1.95076	1.63862	15.4915	0.00500987	0.0300326	CG42562	CG42562		0.53062	1.34202	1.65112	2.2356	5.84719	2.68767	6.05898
FBgn0040069	1.70088	6.26793	15.6337	0.0050238	0.030065	CG32754	vanin-like	vanin-like	23.9916	26.0236	47.271	66.7124	147.174	72.0631	135.591
FBgn0030407	0.942707	2.61482	15.4549	0.00504106	0.0301061	CG2543	Fpgs	Folylpolyglutamate synthase	4.13125	4.02607	5.01452	5.0301	8.36149	5.26335	9.47798
FBgn0028516	0.721219	4.09109	15.4257	0.00506619	0.0301785	CG3994	ZnT35C	Zinc transporter 35C	10.0439	14.4705	15.227	16.0557	20.5237	23.5731	17.3547
FBgn0053333	1.41586	6.45155	15.4117	0.00507834	0.0302194	CG33333	CG33333		42.7907	26.607	60.6635	83.5302	127.703	150.285	104.561
FBgn0000244	1.01349	5.71473	15.4087	0.00508088	0.0302194	CG9379	by	blistery	32.1025	25.2067	43.4796	52.3334	62.9743	65.6798	76.9058
FBgn0037683	1.04481	6.68279	15.4033	0.00508553	0.0302211	CG18473	CG18473		69.8902	47.7877	70.0198	108.376	122.85	133.319	149.96
FBgn0030544	1.21944	5.15382	15.387	0.00509975	0.0302541	CG13403	CG13403		18.7233	13.5369	26.418	36.1761	50.6367	50.8977	46.1781
FBgn0030005	2.36539	1.38774	15.3204	0.00515802	0.0303471	CG2120	CG2120		0.227408	0.46679	1.34536	1.82913	3.80068	3.97551	5.27997
FBgn0014469	0.695173	7.33108	15.3201	0.0051583	0.0303471	CG2060	Cyp4e2	Cytochrome P450-4e2	126.553	102.285	157.774	147.905	172.141	202.527	201.072
FBgn0032235	1.09004	6.88213	15.3196	0.00515877	0.0303471	CG5096	CG5096		57.6101	61.6163	99.0062	114.778	153.957	140.207	177.528
FBgn0035733	0.819274	1.28283	15.3182	0.00515996	0.0303471	CG8641	CG8641		1.66766	1.51707	2.26265	1.98156	2.68971	3.02362	2.98621
FBgn0260393	1.50601	4.42939	15.2894	0.0051855	0.0304356	CG17147	CG17147		8.94473	6.18497	13.8817	21.2382	31.341	31.3001	32.6752
FBgn0037341	0.70353	4.03887	15.2741	0.00519908	0.0304383	CG12746	CG12746		13.6066	10.6778	14.6766	15.1919	20.8745	15.79	21.8123
FBgn0010549	1.34245	2.65466	15.2612	0.00521062	0.0304561	CG8799	l(2)03659	lethal (2) 03659	3.75224	3.03414	3.85262	5.08091	7.13358	5.6553	13.373
FBgn0035427	0.739126	6.52543	15.1889	0.00527577	0.030675	CG14959	ckd	cracked	76.7883	53.9726	78.3977	91.5073	116.71	126.712	92.1831
FBgn0033574	0.673433	3.38795	15.188	0.00527656	0.030675	CG7722	Spn47C	Serpin 47C	6.40534	9.16076	10.2125	9.04403	13.3901	12.1505	11.4255
FBgn0058298	1.97535	2.01139	15.1748	0.00528859	0.0307275	CG40298	CG40298		0.758028	0.991929	2.62956	2.99774	6.54886	4.59143	7.96324
FBgn0266349	0.926122	0.665205	15.131	0.00532872	0.030839	CR44998	asRNA:CR44998	antisense RNA:CR44998	0.871732	1.16698	1.46766	1.06699	1.8711	1.95976	1.90425
FBgn0033903	1.27602	3.22811	15.0858	0.00537043	0.0310119	CG8323	CG8323		3.63854	4.49286	7.82754	8.28189	12.5715	10.7507	15.537
FBgn0266377	0.601895	5.51717	15.0842	0.00537197	0.0310119	CG45019	Pde8	Phosphodiesterase 8	29.7526	40.6691	44.5191	42.324	51.3968	54.3133	53.146
FBgn0038693	0.780099	2.94433	15.0545	0.0053996	0.0311458	CG5237	unc79	uncoordinated 79	4.20706	6.65176	7.15486	6.50357	9.70634	8.8469	9.39143
FBgn0050413	1.76972	3.7566	15.2023	0.00541454	0.0311492	CG30413	CG30413		3.52483	3.61763	9.23405	11.3304	22.6286	16.406	23.7599
FBgn0052750	1.80235	3.68407	15.1869	0.00542882	0.0312002	CG32750	CG32750		2.7668	3.96772	9.0506	10.1618	24.5582	15.4541	20.2543
FBgn0267385	0.979284	8.95855	15.0066	0.00544469	0.0312442	CG7070	PyK	Pyruvate kinase	324.777	259.302	435.774	454.488	635.415	517.656	774.338
FBgn0026593	0.822391	2.71474	14.9544	0.00549428	0.0313433	CG5707	CG5707		4.09335	4.49286	6.11527	5.79224	6.78275	7.89502	9.30487
FBgn0030634	0.768485	1.22734	14.9421	0.00550607	0.0313648	CG9164	CG9164		1.66766	2.21725	1.89573	1.52427	2.57277	3.13561	2.55343
FBgn0036949	1.14872	8.52489	14.9136	0.00553352	0.031428	CG7290	CG7290		202.166	157.892	267.421	387.064	474.149	515.192	511.681
FBgn0032433	0.902414	5.91526	14.9062	0.00554061	0.0314329	CG5427	Oatp33Ea	Organic anion transporting polypeptide 33Ea	34.4145	39.4438	61.5196	48.98	62.3311	79.1742	87.3792
FBgn0036229	1.64687	3.81546	14.9532	0.00555109	0.0314517	CG7248	CG7248		3.90385	4.55121	10.3348	11.8893	23.9735	16.07	23.8032
FBgn0034480	3.2726	3.40612	15.0919	0.00555397	0.0314517	CG16898	CG16898		0.26531	1.16698	5.13682	2.94693	9.94023	15.5101	33.6706
FBgn0002306	0.685834	6.51298	14.8572	0.00558828	0.0315997	CG2507	sas	stranded at second	56.132	89.157	89.1606	69.9642	115.365	106.835	103.868
FBgn0001137	0.718392	3.37637	14.8017	0.0056428	0.0317839	CG17610	grk	gurken	9.17214	6.12662	8.68368	9.90778	10.6419	13.8863	12.594
FBgn0037818	1.19258	3.3823	14.7766	0.00566772	0.0318674	CG6465	CG6465		5.2683	4.25946	7.46063	10.9748	15.0858	13.8863	13.7193
FBgn0032116	1.18381	3.75226	14.7624	0.00568182	0.0318674	CG3759	Mco1	Multicopper oxidase 1	6.14003	6.53506	12.5975	11.1272	15.4951	16.6299	22.5914
FBgn0013733	0.689759	10.8173	14.7541	0.00569018	0.0318674	CG18076	shot	short stop	1093.27	1646.14	1669.71	1596.63	2080.84	2149.57	2215.47
FBgn0038680	1.28335	4.38678	14.7486	0.00569567	0.0318803	CG11821	Cyp12a5	Cyp12a5	13.0381	8.22718	14.5543	18.3421	22.9795	22.5652	41.3742
FBgn0032284	1.02899	4.4999	14.7455	0.00569872	0.031882	CG7294	CG7294		23.3852	10.3277	14.4932	17.4275	29.3529	37.3474	22.9376
FBgn0003373	0.634316	8.42246	14.7427	0.0057016	0.0318828	CG11720	Sgs3	Salivary gland secretion 3	328.188	228.144	318.972	292.508	433.745	453.544	323.55
FBgn0003386	0.811782	3.17889	14.7132	0.00573127	0.0319562	CG2822	Shaw	Shaker cognate w	4.81348	8.46058	8.37792	6.91004	12.3376	10.3587	10.6032
FBgn0036336	0.657437	3.12021	14.6984	0.00574614	0.0320083	CG11268	ste14	isoprenylcysteine carboxylmethyltransferase	7.9972	5.60148	7.21602	8.18027	9.41398	9.6308	11.2957
FBgn0036367	1.61303	3.55697	14.6931	0.00575151	0.0320228	CG10116	CG10116		3.22162	3.90937	9.53982	9.39969	21.81	14.3902	16.9652
FBgn0260006	0.832101	4.86137	14.641	0.00580467	0.0320719	CG33968	drd	drop dead	20.9974	15.1707	25.8064	29.2153	37.8313	35.0516	35.3585
FBgn0052053	1.46276	2.83978	14.6351	0.00581069	0.0320719	CG32053	CG32053		2.23618	2.74239	5.99296	5.99548	9.41398	9.91077	11.6852
FBgn0036996	1.8438	10.3234	14.6202	0.00582601	0.0320719	CG5932	mag	magro	262.657	349.451	941.507	981.48	2096.92	2042.68	1965.66
FBgn0034797	0.885556	6.27365	14.5965	0.00585055	0.0321095	CG12781	nahoda	nahoda	37.5603	63.4835	71.6098	65.4422	99.4023	114.898	80.195
FBgn0039321	1.4187	4.91953	14.5942	0.00585296	0.0321095	CG10550	CG10550		9.62696	12.4866	26.4791	25.0489	38.0652	51.6256	41.9801
FBgn0032144	1.86046	9.73902	14.5516	0.00589725	0.0322153	CG17633	CG17633		179.312	229.894	629.567	637.96	1631.43	1118.69	1330.77
FBgn0053978	0.645174	8.79792	14.5451	0.00590411	0.0322165	CG33978	CG33978		283.806	413.868	441.278	367.757	526.774	560.77	484.07
FBgn0037100	1.45277	0.806855	14.5423	0.00590707	0.0322165	CG14575	CapaR	Capability receptor	0.492718	0.875232	1.0396	1.62589	2.74818	2.18373	2.38032
FBgn0034295	1.01159	4.28536	14.5235	0.00592683	0.0322789	CG10911	CG10911		10.9156	19.6635	15.3493	11.1272	30.3469	18.1417	27.5684
FBgn0040364	1.07844	5.03181	14.5158	0.00593491	0.0322789	CG11378	CG11378		14.6678	21.7641	24.5222	31.8065	45.1403	33.2039	51.5446
FBgn0038419	1.39768	2.71934	14.5122	0.00593874	0.0322789	CG14879	CG14879		1.66766	5.95158	4.34184	4.21716	9.70634	9.74279	8.78553
FBgn0260005	1.04688	3.28179	14.5091	0.00594193	0.0322789	CG31284	wtrw	water witch	4.58607	10.5611	6.9714	5.84305	14.7934	11.0866	12.3776
FBgn0041789	0.780504	7.7174	14.5079	0.00594328	0.0322789	CG31794	Pax	Paxillin	148.157	144.647	185.17	198.105	275.461	197.376	297.193
FBgn0051793	1.02777	4.13912	14.5037	0.00594771	0.0322789	CG31793	CG31793		12.7349	11.9032	13.8817	12.5499	17.7755	16.7419	33.8005
FBgn0010358	1.18673	8.82088	14.469	0.00598458	0.0323665	CG12351	deltaTry	deltaTrypsin	221.003	196.052	353.034	454.386	603.313	564.522	688.733
FBgn0032782	1.28652	2.26754	14.4682	0.00598543	0.0323665	CG9994	Rab9	Rab9	1.78137	2.2756	3.66916	4.57282	6.54886	5.99126	7.35734
FBgn0017482	0.799232	4.38011	14.4663	0.00598744	0.0323665	CG3425	T3dh	Type III alcohol dehydrogenase	15.4638	13.0701	17.2451	20.3745	23.3888	21.4453	31.3336
FBgn0004396	0.648552	6.75888	14.4006	0.00605798	0.0323665	CG7450	CrebA	Cyclic-AMP response element binding protein A	78.1906	113.138	100.657	74.6894	145.771	125.536	111.615
FBgn0037166	0.842746	3.94108	14.3878	0.00607193	0.0323665	CG11426	CG11426		9.39955	10.211	11.4355	16.8178	16.723	19.9335	20.4274
FBgn0035911	0.662353	4.22782	14.3785	0.00608197	0.0323665	CG6638	CG6638		14.5541	13.1868	15.7774	19.2059	21.8685	18.9816	24.9717
FBgn0011774	0.788754	2.64109	14.3748	0.00608601	0.0323665	CG5247	Irbp	Inverted repeat-binding protein	4.92718	4.20111	4.46415	6.0971	6.43191	6.94314	9.13176
FBgn0043783	0.973106	5.18158	14.368	0.00609341	0.0323665	CG32444	CG32444		20.2015	20.4221	28.436	38.4625	45.9589	41.4909	52.843
FBgn0039777	1.45755	8.94046	14.3657	0.00609597	0.0323665	CG2229	Jon99Fii	Jonah 99Fii	189.697	165.127	339.03	481.671	758.615	614.188	781.22
FBgn0032981	2.40805	3.38104	14.5357	0.00611541	0.0323975	CG3635	CG3635		0.833831	1.98386	5.50374	6.96085	18.8864	14.6702	20.1678
FBgn0040717	0.959914	5.72021	14.3289	0.00613628	0.032446	CG15361	Nplp4	Neuropeptide-like precursor 4	35.741	25.7902	49.656	46.0839	74.0839	53.7533	75.3911
FBgn0038613	1.84992	5.0284	14.5145	0.0061382	0.032446	CG7678	Vha100-4	Vacuolar H[+] ATPase 100kD subunit 4	7.80769	7.35195	21.5257	27.6402	50.9875	52.8014	51.4148
FBgn0053124	2.71344	1.03368	14.3217	0.00614423	0.0324482	CG33124	CG33124		0.341113	0.116698	0.366916	1.57508	2.98207	2.18373	5.32325
FBgn0002440	2.16182	6.7938	14.4976	0.00615641	0.0324942	CG12755	l(3)mbn	lethal (3) malignant blood neoplasm	14.7816	24.1564	72.7717	74.1813	205.587	163.724	188.088
FBgn0040958	1.03109	7.37883	14.3041	0.00616369	0.0324942	CG31893	Peritrophin-15b	Peritrophin-15b	120.602	79.2377	101.391	181.643	222.954	202.919	230.544
FBgn0032281	2.45197	6.07782	14.483	0.00617226	0.0324948	CG17107	CG17107		8.67942	8.98571	27.2129	51.6221	150.507	101.123	103.522
FBgn0033124	0.826652	4.32606	14.296	0.00617266	0.0324948	CG12847	Tsp42Ec	Tetraspanin 42Ec	11.2567	15.1123	15.3493	21.289	23.0379	23.965	27.2222
FBgn0085447	0.787034	4.60725	14.2884	0.00618112	0.0324957	CG34418	sif	still life	12.7728	21.7058	23.7272	19.7139	28.5343	31.1321	29.7756
FBgn0262613	2.3646	3.73437	14.467	0.0061897	0.0324957	CG43139	CG43139		1.44025	2.10056	7.03256	9.39969	24.6752	18.1417	25.5343
FBgn0250757	1.54256	7.28214	14.2804	0.00618997	0.0324957	CG42235	CG42235		45.2922	55.7231	106.344	150.039	233.595	231.979	231.367
FBgn0000451	0.740862	2.90383	14.2636	0.00620874	0.0325369	CG6611	ect	ectodermal	4.39656	7.2936	6.11527	6.40195	7.95218	10.4147	8.52586
FBgn0038983	1.08086	1.45945	14.2457	0.00622871	0.0325729	CG5326	CG5326		1.28865	2.04221	2.56841	1.72751	3.68373	2.79965	4.11145
FBgn0264750	1.07759	7.50434	14.2347	0.00624107	0.0325885	CG44008	CG44008		93.0101	86.7647	160.709	174.834	241.606	221.341	261.705
FBgn0033541	0.598172	7.9917	14.2044	0.00627531	0.0326864	CG12934	CG12934		246.094	182.865	202.66	246.577	316.801	254.376	310.696
FBgn0051706	0.703379	1.24979	14.2014	0.00627874	0.0326864	CG31706	CG31706		2.19828	1.57542	1.95689	1.82913	2.68971	3.07962	2.46687
FBgn0264272	0.749614	2.89835	14.1936	0.00628752	0.0326944	CG43772	mwh	multiple wing hairs	4.62397	6.88516	6.78795	5.74143	7.65982	11.1986	8.04979
FBgn0039525	1.37597	1.57348	14.1919	0.00628955	0.0326944	CG5646	CG5646		1.28865	1.40037	1.40651	3.09936	4.15151	3.30359	4.93374
FBgn0050069	0.623852	8.86541	14.1716	0.0063126	0.0327995	CG30069	CG30069		312.27	475.484	445.558	359.678	547.882	574.601	512.504
FBgn0003074	1.06059	8.86019	14.1686	0.00631603	0.0328026	CG8251	Pgi	Phosphoglucose isomerase	238.476	240.397	419.14	431.166	569.984	547.948	724.698
FBgn0013995	0.908548	4.30608	14.1581	0.00632806	0.0328275	CG5685	Calx	Na/Ca-exchange protein	10.4987	12.8367	18.2846	18.4945	23.7981	21.9493	29.0831
FBgn0034624	2.23785	1.67437	14.1478	0.00633982	0.0328361	CG17974	CG17974		0.416916	0.641837	2.69072	1.37185	5.73025	3.47157	6.49177
FBgn0037144	1.30852	1.44101	14.124	0.00636721	0.0328792	CG7458	CG7458		1.25075	1.16698	1.95689	2.38803	3.39137	2.74366	4.89047
FBgn0051014	2.17884	2.01831	14.0553	0.00644713	0.0332304	CG31014	PH4alphaSG1	prolyl-4-hydroxylase-alpha SG1	0.606423	0.641837	2.99648	2.43884	6.49039	5.15136	8.22291
FBgn0040342	2.08862	2.80347	14.0246	0.00648326	0.0332711	CG3706	CG3706		0.644324	2.45065	4.03608	5.0301	12.9808	10.9746	10.4301
FBgn0038005	1.6868	1.74089	14.0226	0.00648556	0.0332711	CG15807	Cyp313a5	Cyp313a5	1.62976	0.583488	2.07919	2.69288	5.84719	3.52756	5.6262
FBgn0039358	0.85567	6.79494	14.0162	0.00649321	0.0332903	CG5028	CG5028		67.7677	69.3767	105.366	103.244	134.836	118.201	162.251
FBgn0034639	1.00307	2.22903	14.0094	0.00650125	0.033302	CG15673	CG15673		2.23618	4.7846	3.85262	2.74369	6.60733	5.93526	5.53964
FBgn0051454	1.20568	0.705524	14.0057	0.00650567	0.03331	CG31454	CG31454		0.758028	0.758534	1.22305	1.42266	1.92957	1.79178	2.59671
FBgn0039807	0.697914	3.29848	13.9795	0.00653673	0.0333658	CG15546	CG15546		6.86016	6.36002	9.78443	9.34888	10.9927	12.4865	11.4688
FBgn0260388	0.856194	4.06988	13.9714	0.00654646	0.033379	CG42514	CG42514		10.4608	9.5692	13.8817	18.1389	20.4652	21.1654	21.1632
FBgn0039006	0.839841	5.19275	13.9417	0.00658206	0.0333938	CG12800	Cyp6d4	Cyp6d4	29.3357	24.2147	30.7598	30.3839	38.0068	35.8915	61.3689
FBgn0037076	0.645678	2.50621	13.9413	0.00658254	0.0333938	CG12972	ebd2	earthbound 2	4.05545	4.55121	4.58645	5.74143	6.89969	5.93526	6.838
FBgn0036831	2.0038	7.38397	14.1158	0.00658799	0.0334058	CG6839	CG6839		34.1871	35.126	92.7075	142.266	223.187	278.565	313.596
FBgn0004878	0.900231	0.49005	13.9313	0.00659462	0.0334112	CG2102	cas	castor	0.909634	0.875232	1.34536	0.914565	1.57874	1.67979	1.73114
FBgn0050377	1.56803	2.89709	13.9218	0.00660614	0.033455	CG30377	CG30377		2.19828	2.2756	6.17642	6.14791	10.8758	10.0787	12.118
FBgn0038135	2.2779	7.24595	14.0563	0.00665867	0.0335029	CG8773	CG8773		19.4055	27.1322	97.9054	94.3526	302.534	191.608	280.704
FBgn0053128	1.12692	9.29924	13.8778	0.00665953	0.0335029	CG33128	CG33128		337.702	271.497	474.3	667.886	845.095	858.317	850.811
FBgn0000075	1.12863	1.16219	13.8717	0.006667	0.0335029	CG10501	amd	alpha methyl dopa-resistant	1.09914	1.05028	1.71227	2.13398	3.15748	2.51969	3.02949
FBgn0031068	0.789719	2.7057	13.8681	0.00667137	0.0335029	CG12534	Alr	Augmenter of liver regeneration	4.77558	4.7846	5.32028	5.74143	6.6658	6.66317	10.1704
FBgn0034290	1.02153	7.12549	13.8449	0.0066999	0.033527	CG5773	CG5773		75.1964	68.6182	127.626	134.39	210.265	169.435	171.036
FBgn0051313	1.62155	7.74106	13.8414	0.00670419	0.033527	CG31313	CG31313		91.9109	55.1396	122.183	204.456	312.533	241.442	413.309
FBgn0032187	0.742633	5.65845	13.8115	0.00674122	0.0336249	CG4839	CG4839		31.8372	35.0093	49.1056	48.3703	56.0161	58.3448	68.2934
FBgn0032456	0.719146	7.46802	13.7921	0.00676533	0.0337161	CG6214	MRP	Multidrug-Resistance like Protein 1	111.695	170.612	154.227	146.483	195.238	188.417	251.794
FBgn0031693	1.20712	5.32596	13.7854	0.0067737	0.0337328	CG14032	Cyp4ac1	Cyp4ac1	16.7524	18.3215	35.9578	36.4302	58.8228	46.1943	60.2003
FBgn0034880	1.2609	1.67568	13.7774	0.00678373	0.0337328	CG5372	ItgaPS5	Integrin alphaPS5 subunit	1.13704	1.75046	2.62956	2.69288	4.97011	3.35958	4.67407
FBgn0264255	1.06556	3.90881	13.7103	0.00686824	0.0339662	CG9907	para	paralytic	5.76101	10.036	14.2486	12.7023	20.8745	19.5416	19.1724
FBgn0013467	0.801289	2.57599	13.6986	0.00688316	0.0340103	CG18285	igl	igloo	3.29742	5.30974	4.83106	5.33496	7.36746	6.27122	8.00652
FBgn0030054	0.626106	3.14185	13.6821	0.00690421	0.0340858	CG12109	Caf1-180	Chromatin assembly factor 1, p180 subunit	6.44324	6.82681	9.29521	7.26571	11.0512	11.3106	8.39602
FBgn0085223	1.67871	1.74239	13.6316	0.00696915	0.0342751	CG34194	CG34194		0.833831	0.991929	2.50726	2.74369	5.02859	4.0315	5.88587
FBgn0267408	1.38093	6.75006	13.6208	0.00698319	0.034315	CG18522	AOX1	Aldehyde oxidase 1	40.4787	45.2203	79.3762	101.771	128.054	130.184	202.63
FBgn0035538	1.51576	3.13183	13.6164	0.0069889	0.0343286	CG18314	DopEcR	Dopamine/Ecdysteroid receptor	1.74346	6.12662	7.15486	5.38577	13.507	12.9344	12.2478
FBgn0035410	1.3487	4.82928	13.5955	0.00701608	0.0344329	CG14964	CG14964		11.9389	9.74425	25.5007	24.236	41.9829	33.9878	45.0962
FBgn0031654	1.61749	8.5605	13.5652	0.00705588	0.0345535	CG8869	Jon25Bii	Jonah 25Bii	117.305	123.874	215.747	379.748	444.387	580.032	685.92
FBgn0054031	0.845155	0.733095	13.5361	0.00709431	0.0345593	CG34031	CG34031		1.06124	1.28367	1.1619	1.42266	1.75416	1.79178	2.29376
FBgn0035587	1.06521	2.66065	13.5354	0.0070952	0.0345593	CG4623	Gdap1	Gdap1	3.03211	5.07635	3.66916	6.0971	8.06913	6.49519	10.1272
FBgn0030746	2.00245	3.75386	13.6968	0.00710715	0.0345689	CG9981	CG9981		2.46359	2.74239	8.68368	10.6699	20.2898	18.6457	26.3566
FBgn0033221	1.03418	6.02348	13.5159	0.00712101	0.0346024	CG12825	CG12825		35.8168	32.3836	51.5517	68.2367	89.6375	71.6711	94.8231
FBgn0265580	2.1694	1.17989	13.4797	0.00716939	0.0347437	CR44407	lncRNA:CR44407	long non-coding RNA:CR44407	0.113704	0.991929	1.22305	1.42266	3.62526	4.0315	3.37572
FBgn0027793	1.43348	2.02532	13.4728	0.00717865	0.0347437	CG14787	CG14787		1.51606	1.34202	2.75187	4.06473	5.61331	5.54331	6.2321
FBgn0033980	2.85922	1.24462	13.4557	0.00720181	0.0347702	CG10245	Cyp6a20	Cyp6a20	0.341113	0.408442	0.794985	1.06699	2.33888	1.06387	8.69897
FBgn0003060	3.50102	5.43408	13.614	0.00721592	0.0348058	CG9757	CG9757		0.833831	2.509	19.5689	10.4667	76.1305	50.0018	122.694
FBgn0032495	1.55939	3.3269	13.4435	0.00721818	0.0348058	CG16820	CG16820		2.6531	3.32588	8.31676	8.48513	14.4426	16.294	14.0655
FBgn0039226	1.57338	3.33518	13.4408	0.00722191	0.0348093	CG18410	Ude	Uracil-DNA degrading factor	2.84261	3.38423	7.52178	8.99322	11.8113	15.0061	18.0471
FBgn0035588	0.83084	5.04375	13.4342	0.00723088	0.034838	CG10672	CG10672		24.7496	19.8969	25.9287	33.0768	39.8194	32.028	50.1597
FBgn0262423	0.931304	1.86115	13.3945	0.00728497	0.0349908	CR42975	mir-281-2	mir-281-2 stem loop	3.44903	2.3923	3.11879	1.77832	3.91762	5.54331	4.19801
FBgn0031737	2.47332	6.78143	13.5582	0.00729036	0.0349937	CG11142	obst-E	obstructor-E	10.385	17.2712	47.271	80.3293	200.325	149.837	225.914
FBgn0031307	1.30635	6.17216	13.3568	0.00733681	0.035075	CG4726	MFS3	Major Facilitator Superfamily Transporter 3	29.4494	31.3333	65.0053	59.1926	105.366	71.7271	126.416
FBgn0032129	0.992197	7.90108	13.32	0.00738797	0.0351999	CG4405	jp	junctophilin	151.719	151.649	240.208	161.573	227.748	285.677	413.309
FBgn0022359	2.7076	6.68776	13.4806	0.00739563	0.0352085	CG4649	Sodh-2	Sorbitol dehydrogenase-2	11.522	8.86902	47.0876	59.904	140.45	125.984	284.599
FBgn0030443	1.77929	7.49502	13.3931	0.00739586	0.0352085	CG12715	CG12715		52.3798	36.5263	139.55	140.335	306.919	269.047	272.654
FBgn0259192	1.91231	-0.1322	13.3022	0.00741277	0.0352514	CG42296	CG42296		0.113704	0.291744	0.611527	0.60971	1.11097	1.11986	1.68786
FBgn0035934	0.774195	1.6413	13.2992	0.00741703	0.0352514	CG5751	TrpA1	Transient receptor potential cation channel A1	2.42569	2.15891	1.95689	3.20098	3.85915	3.52756	3.72195
FBgn0038662	0.796308	5.05597	13.2936	0.00742489	0.0352596	CG14290	Mpc1	Mitochondrial pyruvate carrier	20.9974	21.2973	31.4325	32.1622	40.6965	34.6037	46.7407
FBgn0038353	1.08375	7.07175	13.2688	0.00745983	0.03531	CG5399	CG5399		56.132	139.629	84.3907	102.177	184.362	148.942	203.582
FBgn0031360	0.858971	5.05933	13.2405	0.00749989	0.0354058	CG31937	CG31937		21.2248	20.4804	27.2741	34.5502	37.8313	36.0035	50.5925
FBgn0031010	2.12626	2.70183	13.2117	0.00754088	0.0354764	CG8028	CG8028		0.985437	1.40037	2.69072	5.94467	9.47245	8.67892	13.7193
FBgn0015591	0.629933	2.33245	13.1976	0.00756112	0.0355161	CG13633	AstA	Allatostatin A	4.81348	3.90937	3.4857	4.62363	5.14553	5.82328	6.31866
FBgn0032669	1.51742	6.78656	13.1902	0.00757178	0.0355254	CG15155	CG15155		25.9625	49.4214	86.1641	95.0131	163.897	152.301	174.369
FBgn0038082	4.02596	3.61303	13.3522	0.00757397	0.0355254	CG5724	Ugt37A2	UDP-glycosyltransferase family 37 member A2	0.492718	0.46679	3.66916	2.2356	6.08108	6.15924	58.1663
FBgn0038740	1.24193	5.13585	13.105	0.00769562	0.0357812	CG4562	CG4562		14.5541	19.6635	26.2956	32.3146	47.83	32.028	65.2206
FBgn0031178	2.03066	2.9818	13.1807	0.00771684	0.035782	CG10918	CG10918		2.00877	1.05028	4.58645	6.45276	9.12162	14.2782	14.9311
FBgn0034468	1.7601	5.7393	13.2448	0.00772743	0.035782	CG11797	Obp56a	Odorant-binding protein 56a	11.4083	15.7542	35.2239	47.8114	75.9551	98.0998	76.473
FBgn0027562	1.18048	1.06451	13.0829	0.00772828	0.035782	CG10345	CG10345		0.758028	1.22532	1.95689	1.57508	2.98207	2.96763	2.33704
FBgn0039311	1.2515	6.43145	13.0816	0.00773021	0.035782	CG10513	CG10513		39.4933	32.0335	68.9191	86.3755	109.752	122.289	128.321
FBgn0036066	1.23095	2.89465	13.0771	0.00773676	0.035782	CG14160	CG14160		2.91841	3.26753	7.52178	5.89386	9.64787	10.6947	10.257
FBgn0085425	1.18672	3.66181	13.0729	0.00774301	0.035782	CG34396	CG34396		5.11669	6.94351	8.98944	13.0579	17.1323	13.7183	20.6005
FBgn0035379	1.05455	1.55084	13.0701	0.00774721	0.035782	CG9972	spz5	spatzle 5	1.44025	1.63377	2.62956	2.48965	3.68373	3.07962	4.45768
FBgn0036181	1.98742	8.38481	13.2226	0.0077597	0.0358083	CG18331	Muc68Ca	Mucin 68Ca	54.3127	80.1712	227.488	251.963	491.574	514.8	621.003
FBgn0003149	1.16723	10.1949	13.0533	0.00777209	0.0358369	CG5939	Prm	Paramyosin	619.499	486.979	1096.9	998.959	1575.88	1282.8	1918.4
FBgn0265186	1.74909	3.76381	13.2072	0.00778218	0.0358692	CG44251	CG44251		2.34989	5.30974	9.23405	11.2796	21.1668	17.6378	24.0195
FBgn0010357	1.64413	9.52318	13.0355	0.00779865	0.0359023	CG18211	betaTry	betaTrypsin	223.201	199.261	510.197	676.117	1017.53	1000.48	1333.71
FBgn0033138	1.2538	4.04095	12.9931	0.00786225	0.0360239	CG12832	Tsp42Eq	Tetraspanin 42Eq	6.82225	6.59341	13.8205	15.8525	22.921	19.8775	25.5343
FBgn0035887	1.66978	9.04258	12.9931	0.00786236	0.0360239	CG7170	Jon66Cii	Jonah 66Cii	134.815	148.848	396.025	458.298	753.645	924.109	753.478
FBgn0033128	1.41059	4.08625	12.9907	0.00786591	0.0360259	CG12142	Tsp42Eg	Tetraspanin 42Eg	7.04966	6.53506	11.9859	15.8525	25.3768	15.2861	32.1559
FBgn0036952	1.30329	8.2655	12.9858	0.00787333	0.0360457	CG6933	CG6933		151.681	104.094	214.768	320.352	441.931	392.455	467.191
FBgn0015032	1.38074	2.56823	12.9669	0.00790202	0.0360828	CG1438	Cyp4c3	Cytochrome P450-4c3	3.75224	1.92551	2.81302	5.99548	7.36746	6.94314	10.7331
FBgn0030575	0.652284	3.3282	12.9603	0.00791208	0.0360948	CG5321	CG5321		9.93017	6.82681	8.13331	8.73917	11.8698	9.57481	13.5462
FBgn0038414	1.35067	3.79706	12.9531	0.007923	0.036127	CG6901	CG6901		5.382	4.84295	10.3348	14.2266	20.1728	19.3736	19.6917
FBgn0038484	1.54534	5.83808	13.103	0.00792951	0.036127	CG5246	CG5246		18.458	18.2632	35.3462	59.0402	87.8249	76.9904	90.7549
FBgn0038181	1.40723	8.8259	12.9055	0.00799605	0.0362466	CG9297	CG9297		183.064	149.023	414.432	364.962	720.082	508.977	735.604
FBgn0036764	1.16462	3.86183	12.9023	0.00800091	0.0362466	CG5535	CG5535		5.95052	7.1769	11.5579	14.8871	19.2373	17.6938	22.0287
FBgn0026190	1.18013	6.32884	12.893	0.00801525	0.0362799	CG9726	PH4alphaMP	prolyl-4-hydroxylase-alpha MP	55.2603	26.6654	57.1166	79.4147	100.455	131.696	98.9778
FBgn0033395	2.30568	2.69304	12.9737	0.00808662	0.0365032	CG1944	Cyp4p2	Cyp4p2	0.454817	1.63377	3.24109	4.67444	10.5249	8.56694	13.5029
FBgn0035154	1.56446	7.72284	12.842	0.0080947	0.0365227	CG3344	hiro	highroad	61.893	65.8758	158.447	193.684	348.668	267.255	332.941
FBgn0085345	2.29616	4.7671	12.9838	0.00811739	0.0365993	CG34316	CG34316		2.53939	5.77653	13.5759	20.5269	38.8254	42.6107	57.1276
FBgn0037724	1.32806	10.0337	12.82	0.00812924	0.0366242	CG9434	Fst	Frost	323.072	563.474	704.785	1071.51	1667.21	1327.76	1474.63
FBgn0030998	0.802841	2.91124	12.7935	0.00817116	0.0367275	CG14195	CG14195		5.87472	4.49286	4.95337	8.3327	8.88774	9.07087	9.52126
FBgn0263216	1.41714	0.400497	12.7876	0.00818057	0.0367487	CG43386	CG43386		0.682225	0.700186	1.0396	0.60971	1.75416	0.951882	2.55343
FBgn0031517	1.09467	3.47803	12.7674	0.00821266	0.0368162	CG15406	CG15406		7.08756	4.02607	9.0506	11.0256	13.9748	15.3981	15.0609
FBgn0038037	0.932889	8.14434	12.7492	0.00824179	0.0368491	CG11466	Cyp9f2	Cyp9f2	176.696	141.963	234.826	300.333	344.224	352.98	388.381
FBgn0036469	2.46976	3.10087	12.9032	0.00824272	0.0368491	CG18649	CG18649		0.758028	0.991929	4.58645	5.79224	13.2147	12.3745	18.7829
FBgn0034618	0.66121	6.89054	12.7137	0.00829895	0.0369863	CG9485	CG9485		75.5754	95.8671	112.888	114.371	136.707	126.488	155.586
FBgn0086906	1.02199	11.7101	12.6823	0.00834992	0.0370426	CG1915	sls	sallimus	1453.63	2224.96	3276.93	2786.63	4751.14	3663.91	4759.38
FBgn0032283	2.01582	7.98238	12.8207	0.00837378	0.0371036	CG7296	CG7296		34.9072	62.9583	173.49	186.216	427.488	428.235	387.775
FBgn0026315	1.75166	6.19848	12.8203	0.00837439	0.0371036	CG6644	Ugt35A1	UDP-glycosyltransferase family 35 member A1	18.6475	18.0298	52.469	63.0033	118.815	93.4524	129.576
FBgn0028397	0.954142	4.46265	12.6422	0.00841557	0.0372022	CG9214	Tob	Tob	11.143	13.3035	20.1804	21.1366	25.2014	25.4768	33.8005
FBgn0038845	1.13285	6.52363	12.6299	0.00843594	0.0372631	CG10827	Alp5	Alkaline phosphatase 5	48.1727	40.0856	66.9622	99.6875	138.462	103.419	130.744
FBgn0051041	2.56463	1.9189	12.6285	0.0084382	0.0372631	CG31041	CG31041		0.303211	0.700186	1.10075	2.89612	5.43789	3.41558	10.4734
FBgn0052250	0.691957	4.3982	12.5962	0.00849173	0.0373555	CG32250	PMP34	Peroxisomal Membrane Protein 34	15.1985	13.3035	19.3854	21.8987	29.0021	24.5809	21.7691
FBgn0037358	0.939541	5.84178	12.5931	0.00849698	0.0373555	CG2185	elm	ethanol sensitive with low memory	33.1258	32.4419	44.7638	62.0888	75.5457	60.4725	83.7005
FBgn0036835	0.589746	1.53762	12.5887	0.00850422	0.0373653	CG14075	CG14075		2.5773	2.2756	2.26265	2.59127	2.98207	3.30359	3.419
FBgn0030828	1.12574	4.96397	12.5833	0.00851333	0.0373653	CG5162	CG5162		14.7057	13.3035	27.5187	31.0444	44.5556	40.203	41.4175
FBgn0036377	2.00932	1.30771	12.5816	0.00851615	0.0373653	CG10710	CG10710		0.454817	0.641837	1.0396	2.2356	2.74818	3.02362	5.75604
FBgn0002531	0.873788	10.4902	12.5579	0.00855582	0.0374685	CG11650	Lcp1	Larval cuticle protein 1	1475.58	694.176	1107.35	1189.95	2018.28	1993.13	1451.73
FBgn0262476	0.698486	2.72291	12.5501	0.00856893	0.0375117	CG43066	CG43066		4.24496	6.47672	6.23757	4.72525	7.25052	7.39108	8.61241
FBgn0010329	1.05136	1.01517	12.5456	0.00857657	0.037518	CG1543	Tbh	Tyramine beta hydroxylase	0.909634	1.34202	1.83458	1.52427	3.15748	2.01575	2.51015
FBgn0019960	0.605887	6.86145	12.5301	0.00860276	0.0375413	CG6455	Mitofilin	Mitofilin	90.6602	88.6318	107.751	112.187	131.445	113.554	157.577
FBgn0085280	1.25244	4.41503	12.5284	0.00860568	0.0375413	CG34251	CG34251		9.51325	7.64369	17.612	21.1366	27.4233	30.0683	31.3336
FBgn0038658	2.26669	3.48051	12.6682	0.00862312	0.0375635	CG14292	CG14292		1.28865	1.75046	5.13682	9.4505	19.7635	16.7979	19.9946
FBgn0034736	1.01715	3.87196	12.5171	0.00862476	0.0375635	CG6018	gas	gasoline	7.80769	7.23525	11.4355	15.9541	20.5821	16.8539	19.7783
FBgn0004028	1.04598	9.75153	12.5136	0.00863081	0.0375635	CG7178	wupA	wings up A	637.54	344.375	742.883	760.816	1259.84	892.473	1256.98
FBgn0259998	1.63005	8.72896	12.4624	0.00871831	0.0378334	CG17571	CG17571		100.856	143.13	306.742	382.948	760.661	532.326	642.296
FBgn0030688	1.5456	7.10849	12.4619	0.00871924	0.0378334	CG8952	CG8952		34.3008	50.7051	109.463	121.79	216.463	184.497	216.306
FBgn0028699	1.81446	4.05993	12.5932	0.00874917	0.0379137	CG7499	Rh50	Rh50	3.48693	4.08442	10.7629	15.0903	26.02	23.6851	28.6503
FBgn0036948	1.3047	7.74039	12.4408	0.00875561	0.0379137	CG7298	CG7298		101.955	78.4791	141.263	227.523	331.068	233.827	338.438
FBgn0011455	0.680224	6.12313	12.4261	0.00878127	0.037954	CG9762	ND-SGDH	NADH dehydrogenase (ubiquinone) SGDH subunit	56.7005	45.162	61.275	69.4561	86.7139	66.7997	93.6546
FBgn0033982	1.26626	3.15704	12.4249	0.00878322	0.037954	CG17453	Cyp317a1	Cyp317a1	3.33532	3.85102	8.25561	7.72299	12.3376	10.3027	14.2819
FBgn0031653	1.42045	11.5813	12.4199	0.00879201	0.037954	CG8871	Jon25Biii	Jonah 25Biii	1285.81	911.233	2156.85	3105.51	4175.66	4401.95	4756.3
FBgn0040959	1.34654	8.74413	12.3846	0.00885372	0.0380402	CG17814	Peritrophin-15a	Peritrophin-15a	184.504	161.159	261.061	473.643	624.246	517.656	688.387
FBgn0039085	0.88193	4.29311	12.3787	0.00886402	0.0380562	CG10170	Ugt303B3	UDP-glycosyltransferase family 303 member B3	11.8631	10.0943	18.9573	19.2567	24.3828	24.077	25.4045
FBgn0036599	1.30407	2.42504	12.3517	0.00891169	0.038176	CG13044	CG13044		2.08458	1.92551	4.95337	4.67444	8.18607	7.44708	6.838
FBgn0038034	0.955591	3.23794	12.348	0.0089183	0.0381761	CG17875	Cyp9f3	Cyp9f3	5.68521	6.30167	6.35988	9.65374	11.8698	8.62293	15.3639
FBgn0263081	1.40375	3.72748	12.3191	0.00896963	0.0383251	CG43349	CG43349		4.05545	6.12662	8.31676	13.8709	23.6227	15.0061	18.5232
FBgn0038143	1.03634	1.65501	12.3157	0.00897583	0.0383374	CG9813	CG9813		1.21285	2.68404	2.81302	2.2356	4.15151	4.0315	3.93834
FBgn0039896	0.634203	3.97613	12.3112	0.00898382	0.0383386	CG1629	yellow-h	yellow-h	9.93017	12.9534	14.004	16.3097	17.9509	20.9974	16.1861
FBgn0263006	1.01268	10.047	12.3103	0.00898548	0.0383386	CG3725	SERCA	Sarco/endoplasmic reticulum Ca(2+)-ATPase	553.474	568.142	1048.77	917.562	1392.8	1116.39	1630.26
FBgn0085390	0.859819	4.12267	12.2858	0.00902948	0.0384186	CG34361	Dgk	Diacyl glycerol kinase	8.1488	17.8547	14.1874	13.9217	22.3948	20.1015	22.6346
FBgn0024963	0.75579	3.8106	12.2846	0.00903169	0.0384186	CG7535	GluClalpha	GluClalpha	7.9593	13.2452	13.9428	10.2126	20.2898	16.35	14.4117
FBgn0030478	0.892661	8.40214	12.2805	0.00903905	0.0384186	CG1640	CG1640		237.945	220.909	276.165	304.906	327.384	355.276	590.621
FBgn0032008	0.74344	2.61983	12.276	0.00904706	0.0384186	CG14277	CG14277		4.09335	4.7846	4.89221	5.99548	7.25052	5.87927	8.74225
FBgn0263980	0.73365	4.58791	12.2752	0.00904847	0.0384186	CG43729	Stacl	Stac-like	13.9856	17.0962	23.2992	23.9819	29.3529	27.3246	30.0353
FBgn0260763	1.18448	0.618161	12.2723	0.00905378	0.0384186	CG42561	CG42561		0.758028	1.28367	1.22305	0.711328	1.81263	1.45582	2.59671
FBgn0033958	1.05606	2.24012	12.2627	0.00907115	0.038433	CG12858	jef	jet fuel	2.34989	2.21725	3.97492	4.77606	5.90567	6.15924	6.36193
FBgn0035607	1.47431	3.38916	12.2587	0.00907838	0.0384398	CG4835	CG4835		2.6531	4.95965	6.78795	10.3651	18.9449	12.2625	14.6714
FBgn0032067	1.94211	4.22898	12.3906	0.00910174	0.0384782	CG9465	LManIV	Lysosomal alpha-mannosidase IV	6.70855	4.14276	7.64408	16.7162	15.2027	26.4847	47.4765
FBgn0037070	0.909088	6.31371	12.2357	0.00912023	0.0385164	CG11309	CG11309		48.6275	43.5282	65.7391	84.3432	100.513	84.7175	116.895
FBgn0053306	1.58836	7.83309	12.2307	0.00912939	0.0385164	CG33306	CG33306		69.8144	61.0912	168.72	212.382	335.22	320.784	372.974
FBgn0038858	0.734835	4.80512	12.2294	0.00913179	0.0385164	CG5793	CG5793		17.8895	21.9391	22.6876	28.6564	31.2825	28.3325	40.8116
FBgn0266446	0.753823	8.07298	12.2189	0.00915091	0.0385454	CG45076	CG45076		224.604	140.329	252.438	256.789	326.39	331.311	324.199
FBgn0051269	1.98604	2.29041	12.1953	0.00919435	0.038662	CG31269	CG31269		0.606423	1.34202	3.17994	3.81069	8.41996	5.76728	9.17503
FBgn0040250	1.39233	3.12537	12.1937	0.00919722	0.038662	CG15902	Ugt304A1	UDP-glycosyltransferase family 304 member A1	3.44903	2.85909	6.05411	8.99322	15.1442	10.1347	12.1612
FBgn0030817	1.14163	1.7459	12.1707	0.00923981	0.0387343	CG4991	CG4991		1.78137	1.98386	2.44611	2.84531	4.61928	2.63167	5.88587
FBgn0033292	0.979996	4.717	12.1664	0.00924787	0.0387343	CG2110	Cyp4ad1	Cyp4ad1	15.8049	12.0782	21.4646	28.2499	35.4925	30.9642	35.5316
FBgn0036953	1.94266	6.06244	12.3076	0.00925131	0.0387343	CG17145	CG17145		11.522	15.4624	40.7888	57.8208	105.074	94.1243	123.171
FBgn0050403	1.00059	4.8543	12.1585	0.00926238	0.0387343	CG30403	CG30403		13.455	19.1384	30.5763	21.5939	31.0486	36.1155	45.226
FBgn0003374	0.688704	6.66422	12.1559	0.00926722	0.0387343	CG12181	Sgs4	Salivary gland secretion 4	66.8581	68.5598	105.55	96.0801	121.856	135.559	105.902
FBgn0040730	1.62301	0.572728	12.1412	0.00929472	0.0387988	CG15127	CG15127		0.492718	0.350093	0.733832	1.52427	2.28041	1.84777	2.25048
FBgn0031523	1.06299	4.2928	12.1275	0.00932044	0.0388502	CG15408	CG15408		10.8019	8.46058	15.5328	20.9842	27.3064	22.8452	27.4818
FBgn0016122	0.628417	5.38003	12.1255	0.00932408	0.0388515	CG10593	Acer	Angiotensin-converting enzyme-related	33.1637	29.1744	37.9758	41.257	45.4327	42.0508	57.4738
FBgn0051789	1.59797	9.41256	12.1184	0.00933744	0.0388912	CG31789	CG31789		174.991	225.693	524.873	597.719	1095.94	794.765	1185.18
FBgn0267029	0.60018	2.38707	12.1136	0.00934654	0.0388912	CR45473	lncRNA:CR45473	long non-coding RNA:CR45473	3.94175	5.54314	4.15838	4.11554	6.84122	5.93526	5.15014
FBgn0002789	1.15236	9.30485	12.1133	0.00934705	0.0388912	CG4696	Mp20	Muscle protein 20	312.346	264.728	547.194	613.774	844.452	723.99	1001.51
FBgn0264386	0.914825	4.21129	12.0994	0.00937326	0.0389051	CG15899	Ca-alpha1T	Ca[2+]-channel protein alpha[[1]] subunit T	7.69399	15.6375	15.8385	17.0211	24.6167	24.245	21.7691
FBgn0037678	1.42374	6.74426	12.092	0.0093873	0.0389051	CG16749	CG16749		42.8665	34.9509	70.6313	111.983	146.531	129.512	188.651
FBgn0037934	1.30139	6.71901	12.0781	0.00941362	0.0389863	CG6830	CG6830		47.8695	39.3271	88.4879	95.1655	112.032	134.215	196.268
FBgn0033880	1.47127	0.679454	12.0647	0.00943916	0.0390781	CG6553	CG6553		0.644324	0.408442	1.0396	1.52427	2.22193	2.79965	1.73114
FBgn0262972	1.0131	7.28974	12.035	0.00949601	0.0392574	CR43283	lncRNA:cherub	cherub	59.7326	129.243	151.475	116.455	213.773	196.928	204.188
FBgn0040377	0.745014	2.35437	12.0294	0.00950664	0.0392873	CG8310	Vha36-3	Vacuolar H[+] ATPase 36kD subunit 3	4.39656	3.61763	4.40299	3.96311	5.32095	4.98338	7.79012
FBgn0024361	0.685658	4.52351	12.0257	0.00951382	0.0393028	CG11415	Tsp2A	Tetraspanin 2A	13.9098	20.072	19.5077	22.9149	29.119	22.7892	29.6457
FBgn0037819	0.684431	6.59998	12.024	0.00951717	0.0393028	CG14688	CG14688		72.7707	106.253	83.5957	61.6823	131.796	97.8759	115.986
FBgn0052054	1.48064	3.21089	11.9983	0.00956665	0.0394412	CG32054	CG32054		2.91841	3.79267	5.50374	9.55212	9.88176	12.5424	17.7442
FBgn0031249	2.25497	8.66817	12.1354	0.00957203	0.0394412	CG11911	CG11911		37.9772	89.4487	254.334	265.986	888.013	527.007	661.511
FBgn0030775	2.06465	5.98268	12.1341	0.00957449	0.0394412	CG9673	CG9673		8.37621	14.0621	39.6881	49.3865	108.816	85.3334	117.414
FBgn0040252	1.77691	3.88834	12.1125	0.00961583	0.0395166	CG4772	Ugt303A1	UDP-glycosyltransferase family 303 member A1	3.29742	3.55928	10.2736	13.1088	26.3124	18.5337	24.2359
FBgn0035978	0.748684	6.81899	11.948	0.00966491	0.0396225	CG4347	UGP	UGP	76.2955	84.139	99.4954	107.156	119.4	113.666	174.758
FBgn0031294	0.815711	7.14429	11.9321	0.00969617	0.039634	CG31795	IA-2	IA-2 protein tyrosine phosphatase	67.0476	126.267	133.007	121.485	174.948	180.074	170.604
FBgn0033423	1.76011	6.37477	12.0575	0.00972186	0.0396534	CG1809	Alp6	Alkaline phosphatase 6	19.0265	20.7138	59.6239	71.7933	143.256	105.155	139.097
FBgn0063649	1.31351	2.76564	11.9148	0.00973034	0.0396534	CG6006	CG6006		2.23618	2.91744	5.32028	6.75762	9.00468	9.01488	10.4301
FBgn0261262	0.914918	2.93577	11.9094	0.00974106	0.0396534	CG42613	CG42613		3.44903	5.83488	7.82754	5.99548	10.2911	10.5827	8.17963
FBgn0042104	1.23428	3.48444	11.8828	0.00979413	0.0397323	CG18747	CG18747		5.3062	3.67597	10.4571	10.0602	16.1967	16.518	13.7193
FBgn0031860	2.20283	2.49554	11.8758	0.00980987	0.0397587	CG11236	CG11236		0.644324	1.16698	3.42455	3.96311	8.77079	5.31934	13.6327
FBgn0034437	1.56637	6.02193	12.0097	0.00981527	0.0397587	CG10051	CG10051		17.0177	20.7138	48.3718	61.2758	107.004	97.9878	87.8986
FBgn0033978	2.44259	6.61715	11.9988	0.00983679	0.0397945	CG10242	Cyp6a23	Cyp6a23	12.6212	18.7883	72.4659	37.3955	105.717	93.5644	304.724
FBgn0039319	1.54001	3.00099	11.8285	0.00990324	0.0399228	CG13659	CG13659		3.22162	3.79267	4.15838	7.11328	8.30302	6.94314	19.5186
FBgn0031579	1.09675	4.47548	11.8202	0.00992008	0.0399422	CG15422	CG15422		11.9768	9.51085	16.7558	24.1852	28.2419	26.3727	34.1467
FBgn0031000	1.71396	6.14367	11.9466	0.00994028	0.039954	CG7876	Muc18B	Mucin 18B	19.7845	17.8547	40.3608	71.2344	109.752	88.525	128.061
FBgn0023541	1.80627	3.42708	11.9339	0.00996573	0.040001	CG3540	Cyp4d14	Cyp4d14	2.08458	2.97579	7.94985	8.63755	11.2266	20.6614	18.4366
FBgn0030929	0.860208	5.6804	11.7881	0.00998561	0.0400188	CG15043	CG15043		32.7089	35.8845	31.1267	59.6499	69.1138	55.0412	68.2069
FBgn0038482	1.82187	3.53177	11.9231	0.00998743	0.0400188	CG4053	CG4053		2.19828	2.97579	7.94985	9.95859	18.6525	14.0543	21.4228
FBgn0266064	0.89354	6.62371	11.7653	0.0100325	0.0400886	CG6904	GlyS	Glycogen synthase	56.0183	60.2743	96.927	89.0684	119.692	100.396	152.254
FBgn0038380	1.20693	2.36446	11.7574	0.0100488	0.0401397	CG14877	CG14877		2.27408	1.92551	5.07567	4.36959	7.48441	6.88715	6.6216
FBgn0039670	0.697229	7.56328	11.7311	0.0101032	0.0402598	CG7567	CG7567		165.023	114.947	140.468	207.403	229.21	214.901	232.708
FBgn0265185	1.46872	5.69079	11.8132	0.0102114	0.0405134	CG44250	CG44250		13.0002	23.8647	35.8355	50.0978	75.3703	62.5442	88.2881
FBgn0039760	1.4671	7.02103	11.6692	0.010233	0.0405415	CG9682	CG9682		52.3418	34.8342	89.2829	132.663	168.633	194.072	207.91
FBgn0044872	1.86851	1.38987	11.6633	0.0102455	0.0405415	CG40305	FucTC	alpha1,3-fucosyltransferase C	0.644324	0.641837	1.0396	2.64208	3.7422	2.74366	5.49636
FBgn0030574	1.29152	6.51136	11.639	0.0102969	0.0406685	CG9413	sbm	sobremesa	35.8168	32.3252	83.6569	83.5302	137.117	120.833	127.325
FBgn0040383	0.788039	6.27425	11.6354	0.0103047	0.0406851	CG5254	CG5254		57.3827	39.8522	70.081	80.1768	95.3093	92.1646	97.2034
FBgn0030394	2.69315	5.81521	11.7605	0.0103212	0.0406942	CG2560	Cpr11A	Cuticular protein 11A	2.5773	8.22718	27.641	31.7557	104.022	64.784	132.908
FBgn0263997	0.84381	0.380246	11.6268	0.0103229	0.0406942	CG43740	CG43740		1.21285	0.816883	0.978443	0.762137	1.52027	1.79178	1.25508
FBgn0031869	0.934035	3.47646	11.6231	0.0103309	0.0406942	CG18304	CG18304		6.55694	7.35195	8.80598	10.6699	13.0392	10.0787	18.9127
FBgn0039482	2.3729	8.67353	11.7556	0.0103315	0.0406942	CG14258	CG14258		27.4406	90.3823	190.185	301.349	755.048	706.856	661.338
FBgn0037057	1.07849	6.81786	11.598	0.0103848	0.0408625	CG10512	CG10512		56.7384	51.697	94.6032	116.861	146.355	128.784	174.196
FBgn0037786	1.38749	1.90171	11.5819	0.0104195	0.0409109	CG5361	Alp13	Alkaline phosphatase 13	1.40235	1.16698	2.93533	3.55664	4.32692	5.71129	5.71276
FBgn0003086	1.62679	5.66308	11.7005	0.010448	0.0409358	CG10790	Pig1	Pre-intermoult gene 1	12.9244	15.8709	32.6555	50.1486	71.2188	65.9038	92.3562
FBgn0039872	1.81263	3.71881	11.6998	0.0104494	0.0409358	CG2196	salt	salty dog	3.41113	2.85909	6.66564	13.4136	17.9509	18.0858	25.491
FBgn0038479	2.10759	1.23468	11.5587	0.0104698	0.0409604	CG17477	CG17477		0.189507	0.758534	1.10075	1.93075	3.09901	2.91164	5.15014
FBgn0263390	2.01377	3.80237	11.6856	0.0104797	0.0409637	CG43442	Nha2	Na[+]/H[+] hydrogen antiporter 2	2.31199	2.6257	9.23405	11.0764	21.5761	16.7979	29.1264
FBgn0267661	1.13234	2.27882	11.5274	0.0105382	0.0410598	CR45999	asRNA:CR45999	antisense RNA:CR45999	2.00877	2.80074	3.3634	5.08091	5.204	6.27122	7.74684
FBgn0264987	3.47823	2.46213	11.6583	0.0105383	0.0410598	CR44138	lncRNA:CR44138	long non-coding RNA:CR44138	0.341113	0.583488	2.07919	1.32104	3.91762	1.73578	24.6254
FBgn0029974	0.678333	0.900594	11.5106	0.0105751	0.0411366	CG10946	dpr14	defective proboscis extension response 14	1.51606	1.40037	1.22305	1.77832	2.16346	2.12774	2.03409
FBgn0042105	1.96185	3.92321	11.6041	0.0106559	0.0413534	CG18748	CG18748		2.6531	3.03414	8.92829	13.566	21.4592	21.3334	30.1218
FBgn0030259	0.873305	0.162762	11.4684	0.0106686	0.0413753	CG1545	CG1545		1.06124	0.583488	0.733832	0.762137	1.34485	1.28784	1.25508
FBgn0037781	1.18408	2.97941	11.4446	0.0107218	0.0415537	CG12812	Fancl	Fancl	2.691	4.02607	7.03256	7.46894	10.5249	10.6387	10.9062
FBgn0038063	0.732734	4.96518	11.4389	0.0107347	0.0415874	CG33976	Octbeta2R	Octopamine beta2 receptor	16.9419	25.3234	28.0079	31.6541	38.65	34.2118	39.7729
FBgn0036227	1.24869	7.67728	11.4316	0.010751	0.0415972	CG17826	CG17826		112.34	69.9019	129.277	227.777	317.678	245.418	291.913
FBgn0262811	2.6335	3.55026	11.5459	0.010784	0.0416831	CG43182	CG43182		0.416916	1.57542	6.05411	7.11328	19.705	17.9738	24.4956
FBgn0085483	2.00827	2.76293	11.475	0.0107896	0.0416909	CG34454	CG34454		1.21285	1.40037	4.5253	5.13172	9.23857	6.77516	16.3593
FBgn0011603	1.58872	4.44103	11.5113	0.0108609	0.0418473	CG15444	ine	inebriated	3.94175	9.86095	17.7954	17.1735	34.2061	29.7323	33.8005
FBgn0040256	1.03286	5.82196	11.3671	0.0108974	0.0418681	CG6633	Ugt35C1	UDP-glycosyltransferase family 35 member C1	32.5194	43.3532	43.8465	44.3056	55.0221	52.6335	112.654
FBgn0038038	0.912066	6.13059	11.3658	0.0109004	0.0418681	CG5167	Sccpdh2	Saccheropin dehydrogenase 2	42.0327	37.1682	60.6635	73.1652	91.0408	72.511	102.743
FBgn0010053	1.12893	6.23943	11.3625	0.0109079	0.041869	CG15101	Jheh1	Juvenile hormone epoxide hydrolase 1	38.7731	33.959	58.5231	78.3985	100.338	76.0946	127.628
FBgn0032913	1.21737	7.54382	11.3212	0.0110033	0.042151	CG9259	CG9259		85.733	70.427	146.216	195.615	237.805	238.866	294.64
FBgn0001124	0.864538	7.67307	11.3083	0.0110332	0.04221	CG8430	Got1	Glutamate oxaloacetate transaminase 1	145.996	114.364	164.073	209.435	229.678	210.03	324.069
FBgn0004577	1.75861	8.14977	11.3846	0.0111083	0.0423717	CG3477	Pxd	Peroxidase	70.724	63.6002	188.901	263.039	425.383	551.644	359.86
FBgn0036552	2.43207	0.666549	11.2684	0.0111264	0.0423855	CG17028	CG17028		0.0379014	0.641837	0.489221	1.06699	2.51429	1.39983	3.8085
FBgn0039854	0.672975	3.79791	11.2621	0.0111413	0.0424279	CG1635	CG1635		10.1955	10.4444	11.1298	14.5314	15.612	13.4383	19.7783
FBgn0052726	0.954001	1.7512	11.2375	0.0111995	0.0425422	CG32726	CG32726		2.46359	1.51707	2.2015	3.60745	4.44387	4.08749	4.15473
FBgn0004400	0.752584	2.42624	11.2311	0.0112145	0.0425528	CG10683	rhi	rhino	3.22162	4.84295	5.25913	3.9123	5.55483	6.15924	7.4439
FBgn0039681	1.22849	2.2931	11.219	0.0112434	0.0425664	CG7582	CG7582		1.81927	2.6257	3.3634	5.0301	5.14553	6.32721	8.39602
FBgn0038631	1.4655	1.97458	11.2188	0.0112438	0.0425664	CG7695	CG7695		1.36445	1.34202	2.3238	4.16635	4.73623	7.78303	4.54424
[truncated: 1,794 more rows]

## Sheet: G0 S–W– vs. S–Lh
GO enrichment of 1216 upregulated genes at T2 in S–W– vs. S–Lh comparison. Number of Genes in this list not analysed in this widget: 398
[truncated: 193 more rows]

## Sheet: DE S–Lh vs. S+Lh
Diferentially upregulated genes in S–Lh vs. S+Lh comparison. Time 2, 72 hours post wasp attack log2 FC is reported in tables.
[truncated: 567 more rows]

[truncated: 4 more sheets: DE S–W– vs. S–Gh, GO S–W– vs. S–Gh, DE S–Gh vs S+Gh, FC  Comparisons]
