# Supplementary material for: Differential gene expression in a tripartite interaction: Drosophila, Spiroplasma and parasitic wasps
Source: PeerJ. 2021 Mar 4;9:e11020. doi: 10.7717/peerj.11020 (PMC7937342; doi:10.7717/peerj.11020)
Supplement: Supplemental Information 6 — Complete outputs of edgeR for the differential expression analyses for each of the pairwise treatment comparisons reported in this study. [file peerj-09-11020-s006.xlsx]

## Sheet: Organization of dataset
Content description of Dataset S6
Inside of this dataset you will find:
1. Output report of edgeR for the differentially expresion analysis at time point 1 (24h post wasp attack). The name of the comparison is specified in the the different sheets. For example, in sheet "All genes:S–W– vs. S+W– T1", we report the edgeR output which includes the information ( i.e, fold change and FDR) for all genes, not only DE genes.
2. Output report of edgeR for the differentially expresion analysis at time point 2 (72h post wasp attack). The name of the comparison is specified in the the different sheets. For example, in sheet "All genes:S–W– vs. S+W– T2", we report the edgeR output which includes information ( i.e, fold change and FDR) for all genes, not only DE genes.
Abbreviations	Meaning
S–	No Spiroplasma
W–	No Wasp parasitism
S+	Spiroplasma infection
Lh	L. heterotoma parasitism
Gh	Ganaspis sp. parasitism
S–W–	No Spiroplasma-No wasp
S+W–	Spiroplasma-No wasp
S–Lh	No Spiroplasma-L. heterotoma
S–Gh	No Spiroplasma-Ganaspis sp.
S+Lh	Spiroplasma-L. heterotoma
S+Gh	Spiroplasma-Ganaspis sp.

## Sheet: All genes S–W– vs. S+W– T1
Differential expression analysis: Result of edgeR corresponding to the S–W– vs S+W– comparision at T1 (24 hours post wasp attack). log2FC is reported
Gene_id	logFC	logCPM	F	PValue	FDR
FBgn0034837	-6.20005	1.96695	556.755	1.05294e-08	0.000105199
FBgn0030647	-7.01974	0.728549	355.608	6.18715e-08	0.000309079
FBgn0030667	-5.93767	0.526767	231.695	3.31161e-07	0.000997363
FBgn0019661	-1.95659	8.53024	201.64	5.68163e-07	0.000997363
FBgn0262104	-4.92996	0.0946216	201.289	5.72005e-07	0.000997363
FBgn0031296	-4.44281	1.43884	198.912	5.98957e-07	0.000997363
FBgn0036809	-6.95197	0.686324	167.341	1.16758e-06	0.00166647
FBgn0005616	-1.12615	3.36473	150.494	1.75498e-06	0.00207752
FBgn0038191	-2.95116	0.454992	147.99	1.87146e-06	0.00207752
FBgn0019660	-7.35336	5.6186	167.093	2.1578e-06	0.00215586
FBgn0034998	-5.6446	-0.0819039	106.14	6.60952e-06	0.00600325
FBgn0028852	-5.74131	-0.413961	101.592	7.79095e-06	0.00648662
FBgn0000146	-2.14018	1.29452	94.4657	1.02269e-05	0.00785975
FBgn0052971	-5.16287	-0.146399	92.4471	1.10846e-05	0.00791042
FBgn0036224	-5.98268	-0.198623	90.3164	1.20897e-05	0.00805253
FBgn0032089	-2.36889	0.43237	78.737	2.00856e-05	0.0125422
FBgn0038277	-2.32775	1.32591	77.1639	2.16328e-05	0.0127137
FBgn0039129	-2.79437	0.577215	75.6811	2.32297e-05	0.0128938
FBgn0010258	-2.90875	0.282157	73.9902	2.52348e-05	0.0132695
FBgn0035571	-4.25459	0.24803	72.7343	2.68654e-05	0.0134206
FBgn0013813	-2.6116	0.000693488	69.5266	3.16694e-05	0.0147192
FBgn0025111	-1.18646	2.00219	69.0855	3.24114e-05	0.0147192
FBgn0013672	-2.32058	9.9837	67.7498	3.94405e-05	0.0171326
FBgn0035608	-4.30991	1.82887	62.2943	4.9779e-05	0.0207226
FBgn0029754	-2.86112	-0.0233158	56.1024	6.85818e-05	0.027408
FBgn0036714	-0.652478	3.88775	49.3069	0.000108247	0.0406125
FBgn0052259	-4.50899	0.0452966	49.113	0.000109753	0.0406125
FBgn0002962	-1.79428	-0.0372562	40.8633	0.0002075	0.0724837
FBgn0004183	1.57081	2.56929	40.6982	0.000210392	0.0724837
FBgn0266000	-0.650102	5.43643	33.738	0.000395738	0.131119
FBgn0016034	-1.37177	0.110456	33.4577	0.000406835	0.131119
FBgn0029710	-1.18204	0.0962548	30.9693	0.000524633	0.1638
FBgn0030660	-0.698356	1.97889	29.8277	0.000592888	0.177444
FBgn0038934	-2.10527	1.78375	29.4829	0.000615666	0.177444
FBgn0085227	0.615001	2.63705	29.3954	0.000621615	0.177444
FBgn0261602	0.297872	10.6129	28.2609	0.000705713	0.195855
FBgn0031896	-0.846166	2.38571	27.1969	0.000797907	0.211431
FBgn0003377	1.54387	0.890504	27.1304	0.000804163	0.211431
FBgn0001970	-0.524242	3.41883	26.3492	0.000882361	0.226043
FBgn0263974	-1.32484	1.10765	25.9376	0.000927388	0.231638
FBgn0000644	1.27187	0.277419	25.5881	0.000967906	0.235862
FBgn0260226	2.00657	0.790626	25.2819	0.00100523	0.238118
FBgn0014340	-0.420842	3.55361	25.1268	0.00102483	0.238118
FBgn0035099	-0.598321	2.7739	24.3406	0.00113185	0.257007
FBgn0039474	1.22513	6.96886	24.117	0.00116482	0.258615
FBgn0013678	-1.40214	10.5498	24.4286	0.00121826	0.2646
FBgn0036519	-0.394117	3.46991	21.9335	0.00155945	0.3315
FBgn0031463	-1.04783	0.0614081	21.3627	0.00168922	0.346146
FBgn0263488	0.97997	4.83481	21.3276	0.00169764	0.346146
FBgn0259237	1.04697	3.81361	20.8294	0.0018229	0.364253
FBgn0000384	-0.337091	4.39101	20.4285	0.00193222	0.378525
FBgn0039768	0.77471	7.12481	20.0907	0.00203075	0.383377
FBgn0263706	0.592053	4.984	19.969	0.00206779	0.383377
FBgn0039788	-1.35226	-0.289534	19.955	0.0020721	0.383377
FBgn0264270	0.518453	6.83823	18.9428	0.00241626	0.438925
FBgn0263235	0.70322	5.2176	18.3246	0.00266203	0.474935
FBgn0003483	-0.650947	1.35449	17.8035	0.00289392	0.507249
FBgn0036502	-0.336245	4.81111	17.4919	0.00304475	0.521527
FBgn0266570	0.301351	5.66564	17.4223	0.00307978	0.521527
FBgn0031760	-0.344283	4.01976	17.1436	0.00322517	0.525608
FBgn0031910	0.343247	6.84648	17.1396	0.00322732	0.525608
FBgn0000078	1.75138	3.20838	17.6004	0.0032617	0.525608
FBgn0022984	-0.327921	3.65983	16.8728	0.00337475	0.535193
FBgn0037920	-0.550162	2.10564	16.5312	0.00357611	0.558265
FBgn0036767	0.657892	5.0113	16.2981	0.00372217	0.572126
FBgn0032005	-0.352594	5.39032	16.1271	0.00383411	0.575295
FBgn0260997	-0.853797	0.931567	16.0915	0.00385795	0.575295
FBgn0027330	0.291568	5.3933	15.5572	0.00423894	0.594607
FBgn0031091	-0.59408	1.768	15.5237	0.00426434	0.594607
FBgn0264296	0.409667	4.69387	15.5153	0.00427074	0.594607
FBgn0250816	-0.739215	1.92447	15.4933	0.00428764	0.594607
FBgn0004186	1.39007	0.986806	15.4509	0.00432027	0.594607
FBgn0022700	1.15273	4.95985	15.5292	0.00441405	0.594607
FBgn0029840	0.382149	4.80351	14.9309	0.00474763	0.594607
FBgn0031483	-0.739771	2.1118	14.9059	0.00476947	0.594607
FBgn0004187	1.27285	1.66115	14.7305	0.00492646	0.594607
FBgn0051427	-1.33834	0.704369	14.6122	0.00503591	0.594607
FBgn0030999	0.553123	6.27624	14.5271	0.0051166	0.594607
FBgn0003714	0.46675	6.08111	14.2066	0.00543535	0.594607
FBgn0026431	-0.317381	2.87511	14.1715	0.0054717	0.594607
FBgn0002622	0.248605	10.8054	14.1556	0.00548834	0.594607
FBgn0267073	0.732878	1.21945	14.1241	0.00552139	0.594607
FBgn0040339	-0.385498	2.68845	14.1099	0.00553638	0.594607
FBgn0023540	0.51035	4.92195	13.8809	0.00578517	0.594607
FBgn0037742	-1.02105	0.521891	13.835	0.00583665	0.594607
FBgn0036486	-0.33611	3.5085	13.7786	0.00590081	0.594607
FBgn0033494	-0.340627	4.75549	13.4965	0.00623513	0.594607
FBgn0051363	-0.48395	4.31719	13.3638	0.00640068	0.594607
FBgn0261593	0.272727	9.52939	13.3017	0.00647999	0.594607
FBgn0000079	1.74932	2.60562	13.5789	0.00652177	0.594607
FBgn0004397	0.336448	6.34539	13.2405	0.0065594	0.594607
FBgn0000635	0.260747	6.41332	13.1838	0.00663401	0.594607
FBgn0034654	0.257403	7.04946	13.1814	0.00663719	0.594607
FBgn0035829	-0.383648	3.57442	13.1758	0.00664467	0.594607
FBgn0030026	0.250358	5.01112	13.081	0.00677212	0.594607
FBgn0036813	-0.284694	4.31003	13.0523	0.00681132	0.594607
FBgn0011822	0.468534	5.24866	12.9359	0.00697316	0.594607
FBgn0026257	-0.563907	1.23045	12.8899	0.00703851	0.594607
FBgn0264449	0.844081	4.0483	12.8404	0.00710959	0.594607
FBgn0039920	-0.312343	5.05288	12.7906	0.00718214	0.594607
FBgn0264695	0.197478	14.2557	12.7453	0.00724893	0.594607
FBgn0262127	0.691024	4.03241	12.6054	0.00745993	0.594607
FBgn0033051	0.361854	4.06111	12.6025	0.00746435	0.594607
FBgn0014020	-0.231032	8.27595	12.5885	0.00748595	0.594607
FBgn0030628	-0.389208	1.85481	12.561	0.00752862	0.594607
FBgn0051814	-0.599319	0.729586	12.5579	0.00753332	0.594607
FBgn0001149	0.398101	9.2228	12.5519	0.0075428	0.594607
FBgn0029161	-0.497452	2.76799	12.4759	0.00766223	0.594607
FBgn0010078	0.273398	10.6882	12.4001	0.00778397	0.594607
FBgn0034543	-0.411415	4.44885	12.3677	0.00783666	0.594607
FBgn0261387	-0.255718	5.64944	12.3507	0.00786457	0.594607
FBgn0013733	0.63065	10.7414	12.3451	0.00787361	0.594607
FBgn0032067	1.28904	2.60023	12.3515	0.00792735	0.594607
FBgn0053306	0.368483	7.6512	12.2622	0.00801148	0.594607
FBgn0023514	0.279749	5.13882	12.2108	0.00809845	0.594607
FBgn0028664	-0.402942	3.8872	12.1825	0.00814686	0.594607
FBgn0029867	-0.345455	5.09883	12.098	0.00829334	0.594607
FBgn0030545	0.54487	3.69143	12.0956	0.00829758	0.594607
FBgn0000152	0.300721	4.44208	12.0896	0.00830821	0.594607
FBgn0029853	0.441099	3.69238	12.0836	0.00831868	0.594607
FBgn0032886	-0.431903	3.95617	12.079	0.00832689	0.594607
FBgn0025549	-0.512898	2.97189	12.0454	0.00838643	0.594607
FBgn0002930	0.366479	4.19351	12.0091	0.00845135	0.594607
FBgn0266711	-0.283151	4.90978	11.9869	0.0084913	0.594607
FBgn0083123	-0.812863	4.96521	11.9743	0.00851403	0.594607
FBgn0026751	-0.474874	2.5349	11.9145	0.00862336	0.594607
FBgn0053128	0.552751	8.69696	11.7636	0.00890717	0.594607
FBgn0036826	-0.37303	2.2692	11.7249	0.00898195	0.594607
FBgn0035667	0.297146	8.99492	11.6189	0.00919039	0.594607
FBgn0052448	-0.292407	3.78336	11.5749	0.00927878	0.594607
FBgn0035753	0.295968	9.56804	11.5493	0.00933069	0.594607
FBgn0053526	-0.226582	6.76235	11.5415	0.0093466	0.594607
FBgn0051148	0.746612	4.29477	11.5383	0.00935315	0.594607
FBgn0030196	-0.499827	2.21101	11.4852	0.00946235	0.594607
FBgn0034368	-0.291733	6.69824	11.4721	0.00948946	0.594607
FBgn0034318	0.296054	6.62764	11.465	0.0095042	0.594607
FBgn0030956	-0.316825	3.50994	11.4091	0.00962162	0.594607
FBgn0027066	-0.237111	7.05619	11.2755	0.00990929	0.594607
FBgn0051410	0.943108	4.81736	11.3043	0.010046	0.594607
FBgn0004430	0.597328	9.16193	11.1999	0.0100769	0.594607
FBgn0039994	-0.272762	5.63589	11.1862	0.0101078	0.594607
FBgn0035842	-0.429659	3.03489	11.0996	0.0103049	0.594607
FBgn0263973	-0.470784	4.13474	11.088	0.0103317	0.594607
FBgn0032518	0.187673	10.1928	11.04	0.0104435	0.594607
FBgn0033294	0.895677	5.99546	11.0948	0.0104613	0.594607
FBgn0005612	0.399766	2.85892	10.9334	0.0106972	0.594607
FBgn0052187	-0.705287	0.0811761	10.932	0.0107007	0.594607
FBgn0039946	0.541109	1.17238	10.9033	0.0107702	0.594607
FBgn0030000	0.303969	4.0545	10.8949	0.0107907	0.594607
FBgn0011288	-0.441408	3.47881	10.8814	0.0108237	0.594607
FBgn0030600	0.350994	4.17264	10.8571	0.0108835	0.594607
FBgn0026576	-0.266176	6.83889	10.7719	0.0110965	0.594607
FBgn0054005	0.562002	0.776942	10.7563	0.0111361	0.594607
FBgn0083987	0.788236	7.03704	10.7234	0.0112201	0.594607
FBgn0026169	1.51024	8.73143	11.204	0.0112495	0.594607
FBgn0035393	0.285988	3.18345	10.7008	0.0112781	0.594607
FBgn0262951	-0.83023	1.8802	10.677	0.0113397	0.594607
FBgn0259219	-0.385058	2.4787	10.6191	0.0114917	0.594607
FBgn0037906	0.454121	4.85942	10.5915	0.0115648	0.594607
FBgn0036024	0.425728	9.71898	10.5699	0.0116226	0.594607
FBgn0065064	1.3906	8.1787	10.9243	0.0117096	0.594607
FBgn0030655	0.393031	2.16301	10.5263	0.0117404	0.594607
FBgn0020508	0.534262	10.2058	10.5194	0.011759	0.594607
FBgn0002569	0.577061	5.53563	10.4989	0.0118148	0.594607
FBgn0041629	0.556258	3.72062	10.4641	0.0119107	0.594607
FBgn0004657	0.243212	7.59914	10.4273	0.0120129	0.594607
FBgn0039902	-0.285149	6.15366	10.4006	0.0120879	0.594607
FBgn0037686	0.206246	8.72836	10.3986	0.0120934	0.594607
FBgn0030433	0.340008	5.39258	10.323	0.0123089	0.594607
FBgn0040005	-0.367392	5.43424	10.2993	0.0123775	0.594607
FBgn0051712	-0.378156	4.04417	10.2978	0.0123818	0.594607
FBgn0036266	-0.361036	2.48741	10.2739	0.0124516	0.594607
FBgn0264607	-0.287313	7.36911	10.2196	0.0126116	0.594607
FBgn0050476	-0.442339	2.26841	10.2096	0.0126413	0.594607
FBgn0037140	-0.490568	4.11869	10.2085	0.0126447	0.594607
FBgn0020312	-0.283993	4.38661	10.1954	0.0126837	0.594607
FBgn0029755	0.364646	4.25735	10.1166	0.0129225	0.594607
FBgn0038388	-0.240097	4.7532	10.0726	0.013058	0.594607
FBgn0259715	0.25078	4.17077	10.0639	0.0130851	0.594607
FBgn0031998	-0.492936	4.21248	10.0546	0.0131141	0.594607
FBgn0031488	-0.719641	2.7506	9.99368	0.013306	0.594607
FBgn0039475	1.92839	1.59163	10.1542	0.0134056	0.594607
FBgn0037235	-0.289841	3.59604	9.96182	0.0134077	0.594607
FBgn0034317	1.35361	1.79644	9.94418	0.0134913	0.594607
FBgn0034948	-0.215585	5.12493	9.87891	0.0136772	0.594607
FBgn0036191	-0.269115	4.39229	9.8397	0.0138069	0.594607
FBgn0034073	0.206128	5.05339	9.82985	0.0138398	0.594607
FBgn0026737	-0.768864	1.86445	9.81842	0.013878	0.594607
FBgn0029167	0.336827	8.77425	9.81198	0.0138996	0.594607
FBgn0085807	-3.10252	2.63707	10.3515	0.014016	0.594607
FBgn0010300	0.638438	6.00635	9.73939	0.0141461	0.594607
FBgn0038261	-0.335557	3.48241	9.67561	0.0143672	0.594607
FBgn0039730	-0.497468	2.78841	9.60341	0.0146228	0.594607
FBgn0035440	-0.197079	4.03271	9.57129	0.0147383	0.594607
FBgn0040349	0.618841	6.81232	9.55651	0.0147919	0.594607
FBgn0052311	0.28853	8.3964	9.54262	0.0148424	0.594607
FBgn0037737	-0.262166	3.41108	9.5171	0.0149359	0.594607
FBgn0033960	-0.931503	0.737786	9.50501	0.0149804	0.594607
FBgn0002590	0.22151	10.7528	9.50339	0.0149864	0.594607
FBgn0026439	-0.326091	5.42085	9.49759	0.0150078	0.594607
FBgn0038296	-0.579871	2.20602	9.49616	0.0150131	0.594607
FBgn0031929	-0.319779	6.71791	9.39859	0.0153796	0.594607
FBgn0035868	-0.378545	2.00058	9.38182	0.0154438	0.594607
FBgn0259171	0.463168	4.58473	9.36655	0.0155025	0.594607
FBgn0029976	0.501644	3.93733	9.35444	0.0155492	0.594607
FBgn0085446	0.46168	8.1633	9.35307	0.0155545	0.594607
FBgn0004425	0.648237	10.8607	9.33815	0.0156124	0.594607
FBgn0031653	0.513482	11.0836	9.33516	0.015624	0.594607
FBgn0039404	0.372342	4.32013	9.31779	0.0156917	0.594607
FBgn0037100	-0.363278	1.56284	9.23074	0.016037	0.594607
FBgn0041604	0.443221	4.36361	9.21523	0.0160995	0.594607
FBgn0051038	-0.403692	5.53392	9.20635	0.0161354	0.594607
FBgn0034915	0.351011	5.82605	9.2025	0.016151	0.594607
FBgn0265048	0.287422	6.66488	9.17824	0.0162498	0.594607
FBgn0031434	-0.548457	0.597811	9.11013	0.0165313	0.594607
FBgn0037935	0.313951	5.53541	9.09553	0.0165924	0.594607
FBgn0034958	-0.229907	4.64829	9.07832	0.0166648	0.594607
FBgn0004882	-0.50176	1.23701	9.04845	0.0167915	0.594607
FBgn0265512	0.549354	2.89278	9.04083	0.016824	0.594607
FBgn0031142	-0.635561	0.304854	9.03039	0.0168686	0.594607
FBgn0001974	-0.479347	3.54189	9.01655	0.0169281	0.594607
FBgn0033999	1.21403	3.32556	9.17904	0.0170075	0.594607
FBgn0000640	2.84541	3.24686	9.46261	0.0171427	0.594607
FBgn0003396	0.71445	5.95489	8.94629	0.0172339	0.594607
FBgn0085777	-4.1999	3.33553	9.43028	0.0172726	0.594607
FBgn0004655	0.342106	4.60459	8.92514	0.0173273	0.594607
FBgn0040233	-0.217286	6.42233	8.88878	0.0174894	0.594607
FBgn0034647	0.512159	4.03624	8.88534	0.0175049	0.594607
FBgn0050009	-0.509031	1.33736	8.84259	0.0176981	0.594607
FBgn0039641	-0.536804	3.42932	8.8392	0.0177136	0.594607
FBgn0027843	-0.662824	5.03023	8.83482	0.0177335	0.594607
FBgn0052603	0.594983	6.28474	8.81957	0.0178033	0.594607
FBgn0027279	0.279958	6.49923	8.76384	0.0180612	0.594607
FBgn0038862	-0.297086	4.5497	8.74475	0.0181506	0.594607
FBgn0037684	-0.482271	5.33732	8.71625	0.0182852	0.594607
FBgn0030998	0.366034	2.56178	8.71232	0.0183039	0.594607
FBgn0030756	-0.590472	1.05714	8.64849	0.0186102	0.594607
FBgn0037447	0.262601	8.22662	8.63887	0.0186569	0.594607
FBgn0036017	-0.455707	1.40299	8.63768	0.0186627	0.594607
FBgn0000667	0.221573	10.2896	8.63154	0.0186926	0.594607
FBgn0243512	0.411381	5.46523	8.6271	0.0187143	0.594607
FBgn0030646	-0.551569	0.474225	8.61692	0.0187641	0.594607
FBgn0003279	0.197023	10.5899	8.61426	0.0187771	0.594607
FBgn0261836	0.747379	12.5628	8.71277	0.018832	0.594607
FBgn0027872	-0.286098	3.94895	8.59214	0.018886	0.594607
FBgn0264848	-0.232092	3.95771	8.58288	0.0189318	0.594607
FBgn0263120	-0.215156	9.39946	8.55474	0.0190719	0.594607
FBgn0032135	-0.29753	3.65353	8.51075	0.0192936	0.594607
FBgn0050054	-0.459526	1.64009	8.48252	0.0194376	0.594607
FBgn0260005	0.463307	3.57225	8.46881	0.0195079	0.594607
FBgn0014455	0.525647	8.91841	8.44163	0.0196484	0.594607
FBgn0030136	0.354693	10.3073	8.43379	0.0196892	0.594607
FBgn0038834	0.227234	9.93159	8.4185	0.019769	0.594607
FBgn0027101	-0.188613	5.80877	8.37449	0.020001	0.594607
FBgn0039804	0.515907	3.35937	8.36416	0.020056	0.594607
FBgn0038943	0.925164	2.42666	8.36219	0.0200665	0.594607
FBgn0030966	0.413448	5.6937	8.35405	0.02011	0.594607
FBgn0002593	0.192181	11.2561	8.32453	0.0202686	0.594607
FBgn0013710	-1.49262	1.63234	8.39364	0.0202811	0.594607
FBgn0025739	0.45038	1.60837	8.31409	0.0203251	0.594607
FBgn0052428	-0.254785	4.47681	8.2885	0.0204644	0.594607
FBgn0015520	-0.398084	2.89437	8.28366	0.0204909	0.594607
FBgn0000097	0.5182	4.30795	8.24264	0.0207171	0.594607
FBgn0050272	-1.92625	1.96697	8.47718	0.0207378	0.594607
FBgn0000032	-0.388693	4.7314	8.2352	0.0207584	0.594607
FBgn0015591	-0.432086	2.61442	8.18147	0.0210602	0.594607
FBgn0000611	-0.232679	6.61889	8.1605	0.0211795	0.594607
FBgn0002973	0.231261	5.4239	8.14605	0.0212622	0.594607
FBgn0250830	-0.201949	5.84676	8.14561	0.0212647	0.594607
FBgn0028398	0.219676	3.80707	8.13087	0.0213495	0.594607
FBgn0041183	0.563818	3.71047	8.12855	0.0213629	0.594607
FBgn0267408	0.242861	7.30141	8.12545	0.0213808	0.594607
FBgn0014018	0.370265	6.31669	8.11435	0.0214451	0.594607
FBgn0039818	0.348437	4.35999	8.11364	0.0214492	0.594607
FBgn0037377	0.301185	3.58147	8.10586	0.0214944	0.594607
FBgn0023521	0.245067	3.13898	8.09394	0.0215639	0.594607
FBgn0025835	0.691981	3.87274	8.08825	0.0215971	0.594607
FBgn0032084	-0.436913	4.45254	8.07868	0.0216532	0.594607
FBgn0038453	-0.193893	4.26624	8.07776	0.0216586	0.594607
FBgn0034879	0.378756	4.52403	8.07023	0.0217029	0.594607
FBgn0038095	-0.867386	4.81582	8.14634	0.0217664	0.594607
FBgn0001075	0.402435	6.17378	8.04777	0.0218356	0.594607
FBgn0030338	1.57552	3.02178	8.31264	0.0218718	0.594607
FBgn0029117	0.242254	4.48029	8.03554	0.0219083	0.594607
FBgn0034138	0.304794	10.4598	8.03298	0.0219236	0.594607
FBgn0036035	0.269415	4.71702	8.02959	0.0219438	0.594607
FBgn0028550	0.796491	5.05144	8.06745	0.0220256	0.594607
FBgn0035262	0.38512	2.19966	8.01249	0.0220462	0.594607
FBgn0000639	1.07033	2.88274	8.07213	0.0220898	0.594607
FBgn0024807	-0.440153	5.82786	7.98843	0.0221913	0.594607
FBgn0031308	0.328384	2.88435	7.98691	0.0222005	0.594607
FBgn0053087	0.307252	6.96328	7.97861	0.0222509	0.594607
FBgn0029929	0.282318	4.9145	7.97562	0.022269	0.594607
FBgn0020618	0.169918	10.7049	7.96363	0.0223421	0.594607
FBgn0038768	-0.253377	3.6012	7.96171	0.0223538	0.594607
FBgn0025595	-0.62221	4.64663	7.95988	0.022365	0.594607
FBgn0027356	-0.186552	8.36849	7.95885	0.0223713	0.594607
FBgn0261722	-0.246565	6.06735	7.94751	0.0224408	0.594607
FBgn0031314	0.301451	2.96128	7.9414	0.0224784	0.594607
FBgn0016917	0.291731	7.5742	7.93	0.0225487	0.594607
FBgn0030100	0.366703	1.79976	7.9267	0.0225691	0.594607
FBgn0058469	0.498923	8.41922	7.90441	0.0227075	0.594607
FBgn0035235	-0.335489	4.40642	7.8916	0.0227875	0.594607
FBgn0036566	-0.275921	6.18552	7.88045	0.0228575	0.594607
FBgn0050392	-0.231419	4.67621	7.87185	0.0229116	0.594607
FBgn0025574	-0.291889	4.85193	7.86978	0.0229247	0.594607
FBgn0032597	0.207015	4.79114	7.83878	0.0231213	0.594607
FBgn0002565	1.24818	3.16721	8.00813	0.0231357	0.594607
FBgn0003130	-0.569436	0.147327	7.82978	0.0231788	0.594607
FBgn0038304	-0.313518	4.91474	7.8071	0.0233245	0.594607
FBgn0036096	0.200923	5.27305	7.79758	0.023386	0.594607
FBgn0038319	0.246418	5.78898	7.79024	0.0234335	0.594607
FBgn0033265	-0.249307	3.70796	7.77289	0.0235464	0.594607
FBgn0264975	0.342544	7.92958	7.74928	0.0237011	0.594607
FBgn0263234	0.348134	4.94774	7.7492	0.0237016	0.594607
FBgn0002579	0.272555	10.0242	7.73973	0.0237641	0.594607
FBgn0051710	-0.466517	3.04614	7.73765	0.0237778	0.594607
FBgn0267661	-0.3617	1.96782	7.69356	0.0240713	0.594607
FBgn0034750	-0.229071	3.43465	7.69293	0.0240756	0.594607
FBgn0052649	0.229149	4.84308	7.68862	0.0241045	0.594607
FBgn0031449	-0.36907	5.28203	7.67286	0.0242108	0.594607
FBgn0065032	0.433952	4.97525	7.65969	0.0243	0.594607
FBgn0032684	-0.507496	4.40685	7.65918	0.0243034	0.594607
FBgn0033787	0.280001	8.55703	7.65821	0.02431	0.594607
FBgn0062413	-0.41573	5.36423	7.65594	0.0243255	0.594607
FBgn0034645	0.345274	7.46018	7.64744	0.0243834	0.594607
FBgn0038704	-0.214267	4.39513	7.64579	0.0243946	0.594607
FBgn0085364	1.10534	9.43052	7.8879	0.0244086	0.594607
FBgn0036415	-0.649795	0.899762	7.62149	0.0245612	0.594607
FBgn0003328	0.23548	7.6828	7.61714	0.0245911	0.594607
FBgn0036717	1.63929	7.08625	7.95757	0.0246489	0.594607
FBgn0066084	0.336285	11.7904	7.58207	0.0248344	0.594607
FBgn0037347	-0.309899	4.11522	7.57081	0.0249131	0.594607
FBgn0037242	-0.196309	4.82878	7.55946	0.0249928	0.594607
FBgn0052528	0.382065	6.06195	7.54827	0.0250717	0.594607
FBgn0030437	-0.785193	0.0240649	7.54088	0.025124	0.594607
FBgn0262007	0.76372	5.22457	7.58624	0.0251318	0.594607
FBgn0030616	0.289679	10.1632	7.53855	0.0251405	0.594607
FBgn0011703	0.18061	5.85452	7.52962	0.0252039	0.594607
FBgn0031816	-0.480144	4.26823	7.52083	0.0252665	0.594607
FBgn0033159	0.413236	5.06812	7.49933	0.0254205	0.594607
FBgn0083014	1.56101	3.52079	7.78128	0.0254798	0.594607
FBgn0013949	0.714197	4.09651	7.48768	0.0255045	0.594607
FBgn0031184	-0.4136	4.04075	7.47219	0.0256165	0.594607
FBgn0026777	-0.181042	6.93594	7.43748	0.0258701	0.594607
FBgn0030365	0.201301	3.9992	7.43556	0.0258842	0.594607
FBgn0034970	-0.184659	3.82817	7.4224	0.0259812	0.594607
FBgn0041721	0.765647	4.86905	7.4528	0.0260901	0.594607
FBgn0266111	-0.408038	2.6535	7.4035	0.0261213	0.594607
FBgn0031639	0.220108	5.21757	7.3974	0.0261668	0.594607
FBgn0015527	0.305476	6.0528	7.38597	0.0262522	0.594607
FBgn0037107	-0.391163	2.07037	7.38291	0.0262751	0.594607
FBgn0036257	0.216013	5.32638	7.37396	0.0263423	0.594607
FBgn0031702	-0.644256	5.34836	7.35282	0.0265019	0.594607
FBgn0266053	-0.257884	5.46915	7.34865	0.0265335	0.594607
FBgn0036766	0.379178	7.13665	7.33678	0.0266238	0.594607
FBgn0053127	0.453785	7.06698	7.33577	0.0266315	0.594607
FBgn0035049	0.695865	5.53813	7.34865	0.0266621	0.594607
FBgn0038609	0.330975	3.45371	7.33054	0.0266714	0.594607
FBgn0038307	0.258953	4.94257	7.32973	0.0266776	0.594607
FBgn0033788	0.66032	7.39239	7.32961	0.0266785	0.594607
FBgn0040600	-1.57592	4.30668	7.64371	0.0267192	0.594607
FBgn0002891	-0.305809	3.29975	7.31201	0.0268135	0.594607
FBgn0037213	-0.216969	6.37311	7.30539	0.0268644	0.594607
FBgn0052698	0.656405	1.22566	7.28206	0.027045	0.594607
FBgn0263768	-0.299279	2.12189	7.27577	0.027094	0.594607
FBgn0038603	-0.364215	4.86697	7.26939	0.0271437	0.594607
FBgn0038771	0.224305	5.85482	7.26432	0.0271834	0.594607
FBgn0029823	0.511973	7.29641	7.25577	0.0272504	0.594607
FBgn0038432	-0.257192	4.38379	7.25548	0.0272527	0.594607
FBgn0013307	-0.37452	5.64394	7.22931	0.0274591	0.594607
FBgn0033657	-0.602935	0.991151	7.22571	0.0274876	0.594607
FBgn0034491	-0.599266	3.98358	7.21684	0.0275581	0.594607
FBgn0025693	-0.231633	5.47214	7.21558	0.0275681	0.594607
FBgn0005593	0.159888	10.582	7.2143	0.0275783	0.594607
FBgn0030178	0.262936	3.90168	7.20715	0.0276354	0.594607
FBgn0028980	-0.291887	2.47432	7.20067	0.0276872	0.594607
FBgn0014868	0.219319	7.43067	7.19696	0.0277169	0.594607
FBgn0040959	0.470425	9.68308	7.1935	0.0277447	0.594607
FBgn0039859	-0.362177	1.68847	7.18141	0.027842	0.594607
FBgn0029826	0.385835	4.27643	7.16844	0.0279469	0.594607
FBgn0086666	0.67068	5.86504	7.17305	0.027965	0.594607
FBgn0011555	-0.226327	7.06128	7.16173	0.0280013	0.594607
FBgn0030481	0.500516	5.87725	7.16115	0.028006	0.594607
FBgn0033826	0.728829	5.78905	7.18984	0.0281181	0.594607
FBgn0035150	-0.306701	3.73529	7.14037	0.0281755	0.594607
FBgn0038868	-0.206342	5.29862	7.13374	0.0282299	0.594607
FBgn0033079	-0.493728	5.83458	7.13267	0.0282386	0.594607
FBgn0037481	-0.331318	1.99427	7.12774	0.0282792	0.594607
FBgn0037185	-0.335463	2.4007	7.11587	0.028377	0.594607
FBgn0046685	0.46911	3.41956	7.11193	0.0284096	0.594607
FBgn0032955	-0.25766	5.23351	7.09784	0.0285265	0.594607
FBgn0034136	-0.567906	1.42425	7.0976	0.0285285	0.594607
FBgn0031318	-0.266278	4.59882	7.07551	0.028713	0.594607
FBgn0024994	-0.286437	5.11082	7.06385	0.0288109	0.594607
FBgn0034217	-0.506951	0.760645	7.04211	0.0289948	0.594607
FBgn0011672	-0.193687	6.09565	7.03515	0.029054	0.594607
FBgn0001942	0.170832	10.445	7.03386	0.029065	0.594607
FBgn0039944	0.461274	0.49874	7.03378	0.0290656	0.594607
FBgn0003517	0.220578	10.8687	7.0192	0.0291901	0.594607
FBgn0250867	-0.397541	2.27423	6.99864	0.0293669	0.594607
FBgn0039427	-0.198912	4.52739	6.98636	0.029473	0.594607
FBgn0028336	0.223044	8.25995	6.9852	0.0294831	0.594607
FBgn0039214	0.576842	6.11929	6.9766	0.0295578	0.594607
FBgn0035951	-0.315157	4.12131	6.97451	0.029576	0.594607
FBgn0040763	-0.655531	0.349756	6.97283	0.0295906	0.594607
FBgn0010399	-0.414871	1.78461	6.96992	0.029616	0.594607
FBgn0003449	0.249286	5.05299	6.95376	0.0297574	0.594607
FBgn0035094	-0.177711	7.81562	6.94533	0.0298314	0.594607
FBgn0003401	-0.40607	1.45383	6.93353	0.0299355	0.594607
FBgn0027574	-0.291621	3.67133	6.92272	0.0300313	0.594607
FBgn0052176	-0.387382	2.99963	6.92019	0.0300538	0.594607
FBgn0065100	1.97644	4.26967	7.22681	0.0301518	0.594607
FBgn0262107	-0.456774	3.32339	6.89331	0.0302937	0.594607
FBgn0035520	-0.26869	3.32099	6.88585	0.0303608	0.594607
FBgn0031805	0.280212	2.75531	6.88582	0.0303611	0.594607
FBgn0050421	-0.266668	5.01103	6.8829	0.0303873	0.594607
FBgn0020294	0.315594	4.96243	6.87918	0.0304209	0.594607
FBgn0035083	-0.35474	8.18032	6.87468	0.0304616	0.594607
FBgn0259140	0.262835	5.71466	6.85288	0.0306594	0.594607
FBgn0039835	0.288296	5.33763	6.85203	0.0306671	0.594607
FBgn0039742	1.39462	2.47153	6.98817	0.0306715	0.594607
FBgn0033101	0.335319	6.35385	6.84947	0.0306905	0.594607
FBgn0035750	-1.13849	1.89672	6.86008	0.0307667	0.594607
FBgn0036023	0.84034	4.87026	6.90397	0.0309536	0.594607
FBgn0263934	-1.38961	3.28324	7.03157	0.030987	0.594607
FBgn0259481	0.157741	5.19932	6.81696	0.0309889	0.594607
FBgn0032974	-0.17564	4.54073	6.81587	0.0309989	0.594607
FBgn0015299	-0.266613	4.61643	6.81162	0.0310382	0.594607
FBgn0030630	0.343068	5.03512	6.8074	0.0310774	0.594607
FBgn0010406	-0.332695	4.35667	6.8021	0.0311265	0.594607
FBgn0003189	0.380002	6.31371	6.79731	0.031171	0.594607
FBgn0038260	-1.32482	2.78917	6.94247	0.0312164	0.594607
FBgn0030218	0.329413	4.54053	6.78303	0.0313043	0.594607
FBgn0085478	0.304451	5.0735	6.77959	0.0313365	0.594607
FBgn0037724	0.423216	9.83167	6.77287	0.0313995	0.594607
FBgn0036975	-0.576631	4.87904	6.76482	0.0314752	0.594607
FBgn0034403	-0.644918	0.864998	6.74901	0.0316245	0.594607
FBgn0035553	1.83468	2.72447	6.98852	0.0316983	0.594607
FBgn0028583	1.42913	3.80922	6.98391	0.0317233	0.594607
FBgn0038058	-0.277638	3.76471	6.72	0.031901	0.594607
FBgn0033196	-0.376506	3.44929	6.70872	0.0320093	0.594607
FBgn0053203	-0.614521	1.16187	6.70498	0.0320453	0.594607
FBgn0038365	-0.380709	1.23819	6.69753	0.0321173	0.594607
FBgn0034901	-0.661353	8.32899	6.70737	0.0321255	0.594607
FBgn0039470	0.406998	8.61287	6.69654	0.0321269	0.594607
FBgn0000003	2.11398	6.24299	6.98184	0.0322691	0.594607
FBgn0037083	-0.716342	2.29314	6.67907	0.0322962	0.594607
FBgn0031054	0.319416	4.13484	6.66344	0.0324489	0.594607
FBgn0020506	1.02831	5.84883	6.82957	0.032449	0.594607
FBgn0032856	-2.3852	1.44062	6.88262	0.0325098	0.594607
FBgn0051323	-0.184656	4.09316	6.64262	0.0326535	0.594607
FBgn0034741	-0.698432	2.98707	6.62958	0.0327826	0.594607
FBgn0086906	0.595238	11.7509	6.64905	0.0329387	0.594607
FBgn0038400	0.358536	7.69059	6.61054	0.0329721	0.594607
FBgn0039915	-0.41542	4.48939	6.61017	0.0329757	0.594607
FBgn0035148	-0.651394	3.27591	6.60734	0.0330041	0.594607
FBgn0039882	-0.327211	4.80215	6.60618	0.0330156	0.594607
FBgn0031909	-0.286872	2.97586	6.60584	0.0330191	0.594607
FBgn0036181	0.706879	8.98288	6.65359	0.0330248	0.594607
FBgn0010042	0.916591	0.859624	6.57896	0.0332895	0.594607
FBgn0038507	-0.778576	1.87263	6.56932	0.0333871	0.594607
FBgn0003149	0.375413	10.7394	6.56877	0.0333928	0.594607
FBgn0041182	0.398753	6.88819	6.56421	0.0334391	0.594607
FBgn0261279	-0.219469	6.15763	6.56002	0.0334817	0.594607
FBgn0029715	0.193588	7.00218	6.54808	0.0336037	0.594607
FBgn0265266	1.90279	0.410498	6.59348	0.0337276	0.594607
FBgn0035432	-0.254941	6.07123	6.5346	0.033742	0.594607
FBgn0031777	-0.220896	2.94245	6.53242	0.0337644	0.594607
FBgn0031021	0.204759	6.75255	6.53001	0.0337893	0.594607
FBgn0039451	-0.198295	4.16563	6.52513	0.0338395	0.594607
FBgn0262146	-1.24615	6.38506	6.70381	0.0342247	0.594607
FBgn0051176	-0.568265	4.95753	6.47978	0.0343119	0.594607
FBgn0030529	0.253064	7.18952	6.47565	0.0343554	0.594607
FBgn0028434	-0.463538	0.889642	6.47011	0.0344138	0.594607
FBgn0015541	0.306357	6.23959	6.46693	0.0344474	0.594607
FBgn0033048	-0.383054	2.76649	6.46597	0.0344574	0.594607
FBgn0033661	0.678559	7.13922	6.46944	0.03455	0.594607
FBgn0039671	0.341514	5.44769	6.45261	0.034599	0.594607
FBgn0035742	0.373135	8.83096	6.44565	0.034673	0.594607
FBgn0004903	-0.182109	4.65759	6.43021	0.0348379	0.594607
FBgn0025936	-0.176243	6.50114	6.41929	0.0349551	0.594607
FBgn0051198	0.251788	10.2918	6.41912	0.0349569	0.594607
FBgn0035422	0.196382	9.68571	6.41895	0.0349588	0.594607
FBgn0036433	-0.339085	3.41466	6.41326	0.0350201	0.594607
FBgn0267033	0.764378	6.38778	6.46358	0.0350533	0.594607
FBgn0030625	0.266173	3.77034	6.40303	0.0351307	0.594607
FBgn0037384	-0.270293	2.69438	6.3936	0.035233	0.594607
FBgn0082973	1.31171	2.36079	6.49317	0.0352683	0.594607
FBgn0262736	0.226763	11.9663	6.38476	0.0353292	0.594607
FBgn0037050	-0.568458	0.352748	6.38245	0.0353544	0.594607
FBgn0030816	-0.492796	4.37652	6.38122	0.0353678	0.594607
FBgn0051439	0.873368	6.02811	6.48418	0.0353684	0.594607
FBgn0034479	-0.498157	4.4499	6.3773	0.0354106	0.594607
FBgn0032010	0.337439	5.69608	6.3702	0.0354884	0.594607
FBgn0261618	0.373711	8.43591	6.36705	0.035523	0.594607
FBgn0037973	0.236937	6.67467	6.36687	0.0355249	0.594607
FBgn0028543	0.393258	7.16447	6.34882	0.0357239	0.594607
FBgn0053181	0.503916	4.83257	6.34652	0.0357493	0.594607
FBgn0267580	0.518124	0.822519	6.34442	0.0357726	0.594607
FBgn0085466	0.372558	3.42978	6.33781	0.035846	0.594607
FBgn0029672	0.308932	4.88815	6.33124	0.035919	0.594607
FBgn0034010	-0.519998	5.63833	6.31326	0.0361199	0.594607
FBgn0038146	0.290964	5.94873	6.29513	0.036324	0.594607
FBgn0039685	1.73851	2.5524	6.49827	0.0363393	0.594607
FBgn0001147	-0.643911	0.404105	6.29322	0.0363456	0.594607
FBgn0032169	-0.256351	2.41053	6.28537	0.0364344	0.594607
FBgn0030105	0.875203	1.75134	6.28252	0.0364668	0.594607
FBgn0023416	-0.518709	2.75098	6.27906	0.0365061	0.594607
FBgn0028381	0.229629	5.75924	6.2736	0.0365683	0.594607
FBgn0000044	0.26809	13.292	6.2701	0.0366081	0.594607
FBgn0021814	0.228567	4.49605	6.2672	0.0366412	0.594607
FBgn0000395	0.323571	3.6705	6.26342	0.0366845	0.594607
FBgn0032535	-1.99265	1.2493	6.41294	0.036691	0.594607
FBgn0030311	0.257456	5.6719	6.26135	0.0367081	0.594607
FBgn0030759	0.232129	3.92121	6.2591	0.0367339	0.594607
FBgn0026077	-1.66869	8.39969	6.52714	0.0367363	0.594607
FBgn0061492	-0.337196	6.28015	6.25406	0.0367917	0.594607
FBgn0053653	-0.233255	5.42994	6.25398	0.0367926	0.594607
FBgn0250871	0.25446	7.19698	6.24804	0.0368609	0.594607
FBgn0003137	0.236833	9.70585	6.24785	0.0368631	0.594607
FBgn0004893	-0.218273	5.56271	6.24617	0.0368825	0.594607
FBgn0086451	0.354083	6.41775	6.21991	0.0371864	0.594607
FBgn0082998	-0.701686	0.183705	6.21956	0.0371905	0.594607
FBgn0267384	-0.196	5.77427	6.21765	0.0372127	0.594607
FBgn0051708	-0.559112	0.517247	6.21539	0.0372392	0.594607
FBgn0041630	0.344947	6.0373	6.2141	0.0372541	0.594607
FBgn0045064	-0.387693	3.7441	6.19844	0.0374374	0.594607
FBgn0264272	-1.14217	4.72764	6.38403	0.037455	0.594607
FBgn0029897	0.206162	9.75596	6.1922	0.0375107	0.594607
FBgn0038723	0.319498	4.46028	6.17463	0.0377181	0.594607
FBgn0037342	0.312164	3.22168	6.17367	0.0377296	0.594607
FBgn0051637	-0.704181	5.27391	6.20076	0.0378675	0.594607
FBgn0069969	-0.424681	1.93367	6.15457	0.0379568	0.594607
FBgn0030777	0.820984	5.33598	6.2374	0.0379758	0.594607
FBgn0031037	0.328038	8.47667	6.12976	0.0382546	0.594607
FBgn0052243	-0.553421	2.18887	6.12919	0.0382616	0.594607
FBgn0033240	0.456945	2.91985	6.12277	0.0383391	0.594607
FBgn0005670	0.322307	7.75416	6.11296	0.038458	0.594607
FBgn0037617	-0.49866	2.29927	6.11216	0.0384678	0.594607
FBgn0038418	0.645103	0.532685	6.11104	0.0384814	0.594607
FBgn0031643	0.179891	5.74527	6.10952	0.0384998	0.594607
FBgn0022288	0.324732	5.92057	6.09715	0.0386507	0.594607
FBgn0053156	-0.308004	3.29263	6.09261	0.0387062	0.594607
FBgn0052350	-0.27942	5.18751	6.09109	0.0387248	0.594607
FBgn0038195	-0.253286	6.44078	6.08035	0.0388566	0.594607
FBgn0036928	-0.248636	6.9896	6.05579	0.0391604	0.594607
FBgn0010425	0.240573	10.4549	6.05379	0.0391852	0.594607
FBgn0262353	-0.325912	2.89519	6.04949	0.0392388	0.594607
FBgn0033524	-0.504533	5.40859	6.04927	0.0392415	0.594607
FBgn0001250	0.294647	8.07441	6.04776	0.0392604	0.594607
FBgn0030778	-1.50896	2.05887	6.169	0.0392833	0.594607
FBgn0030572	0.240548	5.28162	6.03576	0.0394104	0.594607
FBgn0040551	-0.27161	5.06126	6.03401	0.0394323	0.594607
FBgn0052438	-0.329205	3.05719	6.03295	0.0394456	0.594607
FBgn0031080	-0.425686	1.37552	6.03024	0.0394796	0.594607
FBgn0031768	-0.28328	3.30587	6.02596	0.0395333	0.594607
FBgn0265081	-0.337496	2.80394	6.01678	0.039649	0.594607
FBgn0022710	0.748025	4.28744	6.05727	0.0396842	0.594607
FBgn0036353	-0.523409	3.71572	6.00677	0.0397756	0.594607
FBgn0038646	-0.242151	4.79393	6.00497	0.0397985	0.594607
FBgn0000157	-0.38983	1.27214	6.00361	0.0398157	0.594607
FBgn0034727	0.241347	5.94093	5.9995	0.0398679	0.594607
FBgn0010774	-0.260981	6.38588	5.99919	0.0398719	0.594607
FBgn0039765	0.33962	4.27082	5.99784	0.0398891	0.594607
FBgn0031579	0.327538	5.14466	5.99729	0.0398961	0.594607
FBgn0033926	0.372131	9.21003	5.9953	0.0399214	0.594607
FBgn0030503	-0.504541	3.96532	5.98893	0.0400026	0.594607
FBgn0032168	-0.198338	3.83289	5.97404	0.0401933	0.594607
FBgn0265991	0.590762	7.18767	5.97379	0.0401965	0.594607
FBgn0033449	-0.326091	1.85304	5.97285	0.0402086	0.594607
FBgn0010043	0.477908	6.80236	5.97277	0.0402096	0.594607
FBgn0053107	-0.431482	1.53845	5.96753	0.040277	0.594607
FBgn0259818	-1.0812	2.61013	6.03076	0.0402897	0.594607
FBgn0030945	0.22943	2.70915	5.9644	0.0403174	0.594607
FBgn0044871	-0.274852	3.51579	5.95734	0.0404085	0.594607
FBgn0263463	0.790078	1.72742	5.95708	0.040412	0.594607
FBgn0019624	0.31475	9.27115	5.95532	0.0404347	0.594607
FBgn0046214	0.201354	8.36231	5.95188	0.0404793	0.594607
FBgn0005586	-0.392164	3.69145	5.94845	0.0405237	0.594607
FBgn0052333	0.372796	3.89544	5.94256	0.0406003	0.594607
FBgn0002626	0.274126	10.034	5.94099	0.0406208	0.594607
FBgn0027654	-0.434717	4.40157	5.92641	0.0408111	0.594607
FBgn0037363	0.339647	5.21473	5.92105	0.0408813	0.594607
FBgn0039731	-0.568184	0.511558	5.92054	0.0408881	0.594607
FBgn0032940	-0.193443	6.80234	5.91878	0.0409112	0.594607
FBgn0038416	0.207639	4.22599	5.91378	0.040977	0.594607
FBgn0031106	0.218879	3.32833	5.90361	0.0411112	0.594607
FBgn0040239	-0.248851	3.89341	5.90005	0.0411582	0.594607
FBgn0004516	-0.383494	4.25459	5.897	0.0411986	0.594607
FBgn0030584	0.409921	5.50676	5.8949	0.0412265	0.594607
FBgn0027111	-0.385903	4.36674	5.89478	0.0412281	0.594607
FBgn0040370	-0.456336	2.4043	5.88458	0.0413636	0.594607
FBgn0032646	0.208282	6.14169	5.88244	0.0413922	0.594607
FBgn0264295	0.951869	1.43385	5.87495	0.0414921	0.594607
FBgn0036919	0.229881	6.34077	5.87413	0.0415031	0.594607
FBgn0020381	-0.32595	4.49774	5.87299	0.0415184	0.594607
FBgn0039271	-0.287355	2.24306	5.86116	0.0416772	0.594607
FBgn0030027	-1.03468	4.0623	5.98743	0.0417785	0.594607
FBgn0051638	-0.224325	3.70636	5.84981	0.0418302	0.594607
FBgn0004369	0.359403	4.11762	5.84937	0.0418362	0.594607
FBgn0037504	0.159159	3.97475	5.84412	0.0419072	0.594607
FBgn0031287	-0.272276	2.44294	5.83915	0.0419746	0.594607
FBgn0264744	-0.443024	0.594288	5.83695	0.0420044	0.594607
FBgn0030603	0.312473	6.38402	5.82204	0.0422076	0.594607
FBgn0085421	-0.3993	3.87464	5.81151	0.0423518	0.594607
FBgn0259742	-0.255058	3.75916	5.80999	0.0423727	0.594607
FBgn0262029	-0.318294	3.61733	5.80885	0.0423884	0.594607
FBgn0036258	0.197488	6.94991	5.80758	0.0424059	0.594607
FBgn0083048	1.14512	4.10294	5.97166	0.0424507	0.594607
FBgn0039631	0.396963	1.9498	5.79846	0.0425315	0.594607
FBgn0011770	0.285305	6.78638	5.79408	0.0425921	0.594607
FBgn0031248	0.411338	5.87487	5.79327	0.0426032	0.594607
FBgn0033302	0.632828	3.14252	5.78597	0.0427044	0.594607
FBgn0035941	-2.02406	0.953083	5.90995	0.0427184	0.594607
FBgn0054056	-0.68769	3.92435	5.78669	0.0429856	0.594607
FBgn0026372	0.319777	8.23239	5.76353	0.0430172	0.594607
FBgn0085414	-0.400539	2.70016	5.75976	0.04307	0.594607
FBgn0011272	0.326122	8.84828	5.75919	0.043078	0.594607
FBgn0029128	-1.54531	6.1693	5.98236	0.043203	0.594607
FBgn0037549	-0.174778	4.34155	5.74396	0.0432923	0.594607
FBgn0003129	-0.635121	0.129298	5.73901	0.0433623	0.594607
FBgn0020503	-0.273933	7.59908	5.73847	0.0433698	0.594607
FBgn0035813	0.921742	4.89644	5.85167	0.0433805	0.594607
FBgn0036662	-0.211499	5.68353	5.73589	0.0434064	0.594607
FBgn0028473	0.297496	7.95369	5.73149	0.0434689	0.594607
FBgn0033904	-0.262945	4.63875	5.73096	0.0434764	0.594607
FBgn0267458	0.804554	0.633475	5.72972	0.043494	0.594607
FBgn0086659	0.890508	6.75131	5.827	0.0435428	0.594607
FBgn0266101	-0.428378	3.4849	5.72592	0.0435479	0.594607
FBgn0004885	0.442732	5.58097	5.71861	0.0436521	0.594607
FBgn0250850	-0.160653	4.92309	5.71167	0.0437512	0.594607
FBgn0053129	-0.264543	8.34084	5.70999	0.0437753	0.594607
FBgn0261451	0.290087	10.4151	5.7072	0.0438153	0.594607
FBgn0020910	0.168775	11.1857	5.70336	0.0438703	0.594607
FBgn0035237	0.282458	6.35958	5.70282	0.0438781	0.594607
FBgn0030467	-0.543456	2.45135	5.70255	0.0438819	0.594607
FBgn0029866	-1.3276	4.09699	5.89671	0.0438916	0.594607
FBgn0003292	-1.75996	4.28327	5.92243	0.0440018	0.594607
FBgn0027084	0.178566	7.40185	5.68402	0.0441491	0.594607
FBgn0043010	-0.191038	4.08253	5.68274	0.0441677	0.594607
FBgn0028996	-0.339333	3.79104	5.68171	0.0441826	0.594607
FBgn0037465	-0.200625	6.18243	5.67785	0.0442386	0.594607
FBgn0015036	0.224839	3.31484	5.66947	0.0443603	0.594607
FBgn0052452	-0.472801	2.02679	5.66665	0.0444015	0.594607
FBgn0000299	0.225034	10.8053	5.66273	0.0444587	0.594607
FBgn0033919	0.230017	6.71805	5.65877	0.0445166	0.594607
FBgn0259985	-0.321783	2.46577	5.65555	0.0445637	0.594607
FBgn0000221	0.284166	2.29945	5.65306	0.0446001	0.594607
FBgn0042137	-0.895346	2.11501	5.6485	0.0446671	0.594607
FBgn0051668	0.35726	2.33131	5.64849	0.0446672	0.594607
FBgn0025874	-0.267289	2.89775	5.64559	0.0447099	0.594607
FBgn0264574	-0.317891	5.12246	5.64268	0.0447527	0.594607
FBgn0027529	-0.375825	6.10286	5.63539	0.0448602	0.594607
FBgn0050479	-0.695548	0.614899	5.62551	0.0450065	0.594607
FBgn0037770	0.211179	4.61866	5.62263	0.0450492	0.594607
FBgn0030788	-0.351989	3.46727	5.62001	0.0450881	0.594607
FBgn0010770	0.286605	4.33485	5.61882	0.0451059	0.594607
FBgn0037976	-0.393931	2.19638	5.61851	0.0451105	0.594607
FBgn0038087	-0.539407	0.968284	5.61299	0.0451927	0.594607
FBgn0030451	-0.304031	4.59424	5.60333	0.045337	0.594607
FBgn0050089	-0.618537	2.60769	5.60182	0.0453597	0.594607
FBgn0051950	0.246835	2.23276	5.60061	0.0453777	0.594607
FBgn0035246	-0.305718	4.00303	5.59899	0.045402	0.594607
FBgn0035877	0.476611	4.17269	5.5938	0.0454799	0.594607
FBgn0032066	1.29826	5.30395	5.77593	0.0457369	0.594607
FBgn0008646	-0.595134	0.248336	5.57665	0.0457386	0.594607
FBgn0013325	0.205432	10.1729	5.57596	0.0457491	0.594607
FBgn0030662	-0.229216	5.09165	5.57441	0.0457726	0.594607
FBgn0034052	0.770318	4.20085	5.62473	0.0458334	0.594607
FBgn0086655	0.425317	3.41436	5.56346	0.045939	0.594607
FBgn0040089	-0.250809	4.00783	5.55772	0.0460265	0.594607
FBgn0034928	-1.33521	2.26521	5.65676	0.0460333	0.594607
FBgn0014417	0.445221	3.68436	5.55388	0.0460851	0.594607
FBgn0020414	0.427721	6.41681	5.54629	0.0462012	0.594607
FBgn0040765	0.335352	4.50732	5.54603	0.0462053	0.594607
FBgn0085822	-3.20338	7.0732	5.76269	0.0462268	0.594607
FBgn0037676	-0.382175	2.02303	5.53996	0.0462986	0.594607
FBgn0032943	-0.453547	2.3991	5.53685	0.0463464	0.594607
FBgn0013683	1.47602	1.62263	5.61268	0.0465517	0.594607
FBgn0011596	0.629499	2.44887	5.52267	0.0465653	0.594607
FBgn0028833	0.265295	7.00014	5.52193	0.0465768	0.594607
FBgn0038581	-0.448554	0.965982	5.50637	0.0468187	0.594607
FBgn0261792	0.249442	3.4277	5.50218	0.0468841	0.594607
FBgn0011710	-0.387941	4.74914	5.49199	0.0470437	0.594607
FBgn0051344	-1.60348	4.31574	5.70204	0.0471098	0.594607
FBgn0082961	0.837687	1.22679	5.48366	0.0471746	0.594607
FBgn0038421	-0.431238	1.86231	5.48338	0.0471791	0.594607
FBgn0034956	-2.33821	1.71482	5.67706	0.0471962	0.594607
FBgn0263916	0.223334	6.37866	5.47926	0.0472441	0.594607
FBgn0052237	0.764292	5.28	5.53878	0.0473348	0.594607
FBgn0026252	0.215057	8.96437	5.47159	0.0473652	0.594607
FBgn0263999	-0.335295	5.11291	5.46348	0.0474938	0.594607
FBgn0034366	-0.268065	2.97749	5.45406	0.0476437	0.594607
FBgn0033185	-0.254292	3.39482	5.45365	0.0476503	0.594607
FBgn0032864	0.279428	5.94116	5.44905	0.0477238	0.594607
FBgn0025390	0.759483	2.15065	5.44714	0.0477543	0.594607
FBgn0035975	-1.42605	4.19905	5.6451	0.047828	0.594607
FBgn0004049	0.274307	4.48875	5.441	0.0478526	0.594607
FBgn0041707	-0.322321	3.48193	5.43711	0.0479151	0.594607
FBgn0031598	-0.168225	4.09593	5.43475	0.047953	0.594607
FBgn0035088	0.193691	4.65926	5.42918	0.0480427	0.594607
FBgn0037446	-0.304305	3.58694	5.42824	0.0480579	0.594607
FBgn0051460	-0.362994	2.28742	5.42545	0.0481028	0.594607
FBgn0030048	-0.281141	3.63682	5.42123	0.048171	0.594607
FBgn0030263	0.200335	6.42505	5.41463	0.048278	0.594607
FBgn0036949	0.20408	8.69655	5.41242	0.0483137	0.594607
FBgn0027539	-0.181348	4.75106	5.40338	0.0484608	0.594607
FBgn0039757	0.169999	10.9383	5.40161	0.0484897	0.594607
FBgn0036428	-0.328823	6.1044	5.38867	0.0487013	0.594607
FBgn0030711	0.388281	3.67681	5.38821	0.0487089	0.594607
FBgn0052054	0.406599	3.66553	5.38629	0.0487404	0.594607
FBgn0050344	-0.473475	4.42343	5.3837	0.0487829	0.594607
FBgn0039290	0.712649	4.22514	5.42062	0.0487847	0.594607
FBgn0031093	0.21582	4.73184	5.38138	0.0488211	0.594607
FBgn0052732	0.17399	5.23186	5.37689	0.0488951	0.594607
FBgn0013720	-0.207478	3.69554	5.37618	0.0489068	0.594607
FBgn0040342	-0.414275	1.21408	5.36928	0.0490206	0.594607
FBgn0039420	-0.501881	1.15579	5.36879	0.0490289	0.594607
FBgn0004362	-0.386203	6.26786	5.36234	0.0491357	0.594607
FBgn0033446	0.188446	7.12335	5.35811	0.0492059	0.594607
FBgn0030345	-0.276521	3.37384	5.35419	0.049271	0.594607
FBgn0000061	-0.451882	2.38765	5.34774	0.0493786	0.594607
FBgn0034276	0.726925	6.08325	5.39422	0.0494494	0.594607
FBgn0263083	1.14842	1.21813	5.34652	0.0495209	0.594607
FBgn0011741	-0.180566	4.13433	5.33746	0.0495506	0.594607
FBgn0039900	-0.362408	3.16597	5.33293	0.0496266	0.594607
FBgn0034419	-0.184449	5.42515	5.32998	0.0496762	0.594607
FBgn0004867	0.152061	10.3684	5.3283	0.0497044	0.594607
FBgn0030425	0.790764	5.49915	5.40459	0.0497263	0.594607
FBgn0042177	0.229474	6.39222	5.32661	0.0497329	0.594607
FBgn0036529	-1.76794	3.33354	5.52212	0.0498612	0.594607
FBgn0016701	-0.212515	5.03728	5.31824	0.0498742	0.594607
FBgn0030723	-0.617406	1.25095	5.31673	0.0498997	0.594607
FBgn0035181	0.347787	4.3594	5.30303	0.0501322	0.594607
FBgn0031307	-0.377504	7.05239	5.29679	0.0502384	0.594607
FBgn0261504	0.956638	5.76266	5.4182	0.0502521	0.594607
FBgn0002789	0.237487	10.375	5.29491	0.0502705	0.594607
FBgn0000317	-0.672577	6.53286	5.32485	0.050326	0.594607
FBgn0039928	-0.223517	8.06167	5.29062	0.0503439	0.594607
FBgn0260768	-0.423854	1.62604	5.28948	0.0503633	0.594607
FBgn0032840	-0.36098	2.72338	5.28802	0.0503883	0.594607
FBgn0005696	0.199847	3.17943	5.28747	0.0503978	0.594607
FBgn0000210	1.0814	4.31167	5.42832	0.050429	0.594607
FBgn0035587	0.277125	4.57451	5.27991	0.0505276	0.594607
FBgn0033194	0.281435	8.39665	5.27865	0.0505492	0.594607
FBgn0267508	-2.89376	1.97908	5.47648	0.0505923	0.594607
FBgn0266710	-1.15363	0.171628	5.27479	0.0506157	0.594607
FBgn0034181	-0.401227	5.90921	5.27478	0.0506158	0.594607
FBgn0022238	-0.553189	4.61799	5.27028	0.0506934	0.594607
FBgn0000261	0.257806	8.54042	5.27015	0.0506956	0.594607
FBgn0031530	-1.16571	6.47763	5.42925	0.0507314	0.594607
FBgn0051475	-1.10014	4.34171	5.40325	0.050894	0.594607
FBgn0039544	-0.221792	3.1388	5.25664	0.0509297	0.594607
FBgn0010039	0.211406	4.47864	5.25619	0.0509374	0.594607
FBgn0038652	-0.436826	6.74104	5.25441	0.0509683	0.594607
FBgn0261436	0.35196	4.87894	5.25276	0.050997	0.594607
FBgn0013688	1.79824	5.73414	5.44978	0.0510264	0.594607
FBgn0266577	-0.74701	-0.0839528	5.24877	0.0510665	0.594607
FBgn0024947	-0.212581	7.11542	5.24861	0.0510692	0.594607
FBgn0013334	-0.316506	6.06398	5.24727	0.0510926	0.594607
FBgn0086669	0.811025	3.50018	5.29527	0.0511114	0.594607
FBgn0266599	0.203602	11.8833	5.2456	0.0511217	0.594607
FBgn0037073	0.228853	6.35991	5.24015	0.0512169	0.594607
FBgn0260648	0.198156	3.69818	5.23844	0.0512469	0.594607
FBgn0031048	0.335993	3.96439	5.23825	0.0512502	0.594607
FBgn0039738	-0.282719	4.26836	5.23813	0.0512523	0.594607
FBgn0037843	0.189113	5.56922	5.23591	0.0512911	0.594607
FBgn0034548	-3.20902	3.68659	5.43249	0.05131	0.594607
FBgn0031776	0.261479	6.14353	5.23333	0.0513364	0.594607
FBgn0030349	0.223352	6.54611	5.22722	0.0514437	0.594607
FBgn0039977	-0.172306	5.20425	5.21743	0.0516163	0.594607
FBgn0036836	-0.671381	2.49486	5.21696	0.0516245	0.594607
FBgn0004449	0.310054	6.38115	5.21683	0.0516268	0.594607
FBgn0035886	0.203945	10.2265	5.21044	0.0517398	0.594607
FBgn0030162	-2.49584	0.797353	5.35806	0.0517535	0.594607
FBgn0040396	0.212057	5.10388	5.20582	0.0518218	0.594607
FBgn0032391	0.365703	1.3677	5.2025	0.0518808	0.594607
FBgn0024289	0.766903	7.10461	5.25779	0.0519373	0.594607
FBgn0083050	0.66143	2.8559	5.19878	0.0519471	0.594607
FBgn0260756	0.303849	1.4037	5.19506	0.0520134	0.594607
FBgn0036761	-0.277492	4.02495	5.19305	0.0520491	0.594607
FBgn0083001	1.75509	4.32347	5.38662	0.0520726	0.594607
FBgn0028982	0.359513	6.41044	5.1913	0.0520804	0.594607
FBgn0028948	-0.295491	3.51028	5.19052	0.0520944	0.594607
FBgn0264953	0.191273	7.70527	5.17831	0.0523131	0.594607
FBgn0037846	-0.244371	5.72484	5.17724	0.0523324	0.594607
FBgn0032484	-0.37634	0.373609	5.21441	0.0524016	0.594607
FBgn0052447	-0.952071	2.3835	5.19654	0.0524888	0.594607
FBgn0032057	-2.6338	2.75287	5.36168	0.0524935	0.594607
FBgn0037762	-1.21724	1.4288	5.19987	0.0524991	0.594607
FBgn0036834	-1.42032	3.27519	5.32884	0.0525545	0.594607
FBgn0086450	0.718562	8.12633	5.20961	0.0526096	0.594607
FBgn0027885	-0.37958	6.10621	5.16119	0.0526219	0.594607
FBgn0039924	-0.175731	5.92951	5.15773	0.0526847	0.594607
FBgn0036550	0.241508	3.1509	5.15693	0.0526992	0.594607
FBgn0262601	0.275348	5.3496	5.15621	0.0527122	0.594607
FBgn0038886	-0.422253	3.11108	5.1512	0.0528031	0.594607
FBgn0027575	-0.383252	3.21257	5.14955	0.0528333	0.594607
FBgn0038499	-0.162015	4.35682	5.14942	0.0528355	0.594607
FBgn0033699	0.295725	10.1006	5.14576	0.0529023	0.594607
FBgn0267001	0.416651	4.16909	5.14553	0.0529063	0.594607
FBgn0040236	0.200718	5.60607	5.14236	0.0529643	0.594607
FBgn0003969	-0.162411	4.63875	5.14045	0.0529991	0.594607
FBgn0036105	-0.309175	2.15958	5.13537	0.053092	0.594607
FBgn0043471	0.319213	6.09793	5.13498	0.0530992	0.594607
FBgn0039908	-0.155691	5.9324	5.13425	0.0531125	0.594607
FBgn0031654	0.273161	9.31954	5.13165	0.0531601	0.594607
FBgn0024558	0.432263	4.97644	5.13103	0.0531716	0.594607
FBgn0035689	-0.292739	2.57814	5.13006	0.0531894	0.594607
FBgn0052017	-0.264876	4.00298	5.12767	0.0532333	0.594607
FBgn0030836	0.506869	6.76204	5.12727	0.0532407	0.594607
FBgn0030645	0.35592	1.74943	5.12666	0.0532517	0.594607
FBgn0010348	-0.168389	9.22201	5.1255	0.0532731	0.594607
FBgn0003041	0.239228	4.99525	5.12232	0.0533317	0.594607
FBgn0032138	0.241046	7.31892	5.11914	0.0533902	0.594607
FBgn0036569	-0.269302	4.24714	5.1188	0.0533966	0.594607
FBgn0026379	-0.167762	4.72669	5.11823	0.0534071	0.594607
FBgn0038876	-0.483466	3.94489	5.11606	0.0534472	0.594607
FBgn0263198	-0.306668	5.14506	5.11292	0.0535052	0.594607
FBgn0030586	1.17478	0.319551	5.10869	0.0535835	0.594607
FBgn0035471	-0.757108	6.96343	5.16296	0.0536359	0.594607
FBgn0039867	0.241033	3.84867	5.093	0.0538751	0.594607
FBgn0085768	-2.64993	2.27816	5.27437	0.0540022	0.594607
FBgn0004426	0.431338	6.61074	5.08534	0.0540183	0.594607
FBgn0043012	-0.218711	4.90114	5.08215	0.0540781	0.594607
FBgn0263220	0.479424	2.64652	5.0812	0.0540958	0.594607
FBgn0030683	-0.913687	3.66831	5.15761	0.0542544	0.594607
FBgn0003463	0.310863	5.50756	5.07008	0.0543049	0.594607
FBgn0053179	-0.699884	0.823035	5.0674	0.0543555	0.594607
FBgn0027602	0.219662	4.81461	5.06621	0.0543778	0.594607
FBgn0011202	0.29241	5.8583	5.06617	0.0543786	0.594607
FBgn0038467	0.26677	5.95786	5.06571	0.0543873	0.594607
FBgn0037721	0.309539	4.45286	5.06194	0.0544585	0.594607
FBgn0259175	-0.332093	7.70143	5.06158	0.0544654	0.594607
FBgn0033377	0.243727	6.23754	5.06123	0.0544719	0.594607
FBgn0265784	0.247256	5.56663	5.05826	0.0545282	0.594607
FBgn0015766	-0.371017	9.24941	5.05629	0.0545655	0.594607
FBgn0030086	0.18491	8.58516	5.05468	0.054596	0.594607
FBgn0086672	0.861113	7.86591	5.14166	0.0546096	0.594607
FBgn0036126	-0.187601	2.83934	5.04363	0.0548062	0.594607
FBgn0032087	0.414698	5.41624	5.03897	0.0548952	0.594607
FBgn0003479	-0.434018	2.44367	5.03775	0.0549185	0.594607
FBgn0010341	0.157913	7.16013	5.03745	0.0549244	0.594607
FBgn0031119	-0.92841	4.19673	5.13516	0.054991	0.594607
FBgn0035914	-0.560128	0.655408	5.02604	0.055143	0.594607
FBgn0032681	-0.946149	2.41902	5.05527	0.0551513	0.594607
FBgn0036953	0.345863	7.21283	5.02438	0.055175	0.594607
FBgn0264834	-0.678562	0.668737	5.02228	0.0552153	0.594607
FBgn0039212	-0.19952	4.54843	5.02118	0.0552366	0.594607
FBgn0034426	0.747902	1.49178	5.02115	0.0552372	0.594607
FBgn0050390	-0.280314	1.85917	5.01263	0.0554015	0.594607
FBgn0030914	0.448828	2.60502	5.01122	0.0554289	0.594607
FBgn0026592	-0.693284	0.0437232	5.00853	0.0554808	0.594607
FBgn0039869	0.279344	4.78891	5.00793	0.0554924	0.594607
FBgn0267035	-0.410828	2.73426	5.00353	0.0555779	0.594607
FBgn0262103	0.31337	4.57483	4.99676	0.0557094	0.594607
FBgn0037164	-0.716125	2.63438	4.99624	0.0557196	0.594607
FBgn0025864	0.230889	6.20524	4.99577	0.0557287	0.594607
FBgn0029712	-0.307437	2.19998	4.9956	0.0557321	0.594607
FBgn0051636	0.603925	0.523566	4.99233	0.0557958	0.594607
FBgn0053531	-0.461001	1.2374	4.98863	0.055868	0.594607
FBgn0086251	-0.50394	1.75635	4.98813	0.0558778	0.594607
FBgn0035718	-0.196928	5.80223	4.98678	0.0559042	0.594607
FBgn0035830	-0.185963	4.7918	4.98574	0.0559244	0.594607
FBgn0035388	-0.648398	5.60659	5.01502	0.0559698	0.594607
FBgn0038643	0.566353	7.89109	4.98281	0.055982	0.594607
FBgn0031432	0.395723	4.83776	4.97812	0.0560738	0.594607
FBgn0034083	0.272927	5.40124	4.9771	0.0560939	0.594607
FBgn0023542	0.273574	5.54046	4.97102	0.0562134	0.594607
FBgn0036368	-0.786055	3.93673	5.02553	0.0562709	0.594607
FBgn0085313	0.261342	4.69384	4.9638	0.0563558	0.594607
FBgn0036341	0.245744	4.8355	4.95713	0.0564879	0.594607
FBgn0003326	0.294579	1.34955	4.9492	0.0566454	0.594607
FBgn0036986	-0.360379	0.95856	4.94411	0.0567468	0.594607
FBgn0038968	0.324602	6.34703	4.94341	0.0567607	0.594607
FBgn0041607	0.397399	5.36365	4.94256	0.0567777	0.594607
FBgn0030991	0.184955	5.35022	4.94192	0.0567904	0.594607
FBgn0032612	-1.35655	1.10365	4.97884	0.0568277	0.594607
FBgn0023179	-0.263854	3.90483	4.93839	0.0568608	0.594607
FBgn0030605	0.241385	6.34217	4.9361	0.0569067	0.594607
FBgn0038681	0.488095	5.89623	4.9329	0.0569708	0.594607
FBgn0003353	-0.469989	1.00263	4.92933	0.0570424	0.594607
FBgn0035413	0.660679	3.12199	4.92764	0.0570764	0.594607
FBgn0033756	-0.480289	0.4273	4.92758	0.0570775	0.594607
FBgn0035293	-0.467626	4.59905	4.92464	0.0571366	0.594607
FBgn0031418	0.505532	7.18646	4.92172	0.0571954	0.594607
FBgn0035189	0.34294	7.02205	4.92157	0.0571984	0.594607
FBgn0052446	-0.204009	5.71414	4.91855	0.0572592	0.594607
FBgn0032281	0.954215	2.10304	4.93752	0.0572907	0.594607
FBgn0021796	0.1716	6.63014	4.91426	0.0573458	0.594607
FBgn0261705	-1.44043	0.946676	4.95694	0.0573589	0.594607
FBgn0024986	0.305315	5.07102	4.91359	0.0573594	0.594607
FBgn0036773	-0.457112	3.84605	4.91335	0.0573643	0.594607
FBgn0027375	-0.278627	4.14237	4.91074	0.0574171	0.594607
FBgn0033379	0.192231	5.51837	4.90583	0.0575165	0.594607
FBgn0040080	0.237469	4.39991	4.90422	0.0575491	0.594607
FBgn0033608	0.239806	6.76645	4.90093	0.057616	0.594607
FBgn0002638	0.16411	6.44642	4.89969	0.0576413	0.594607
FBgn0034500	-0.924571	5.47986	5.00716	0.0576453	0.594607
FBgn0011584	-0.321909	7.36136	4.8908	0.0578223	0.594607
FBgn0262508	0.22881	8.56722	4.88385	0.0579645	0.594607
FBgn0038752	0.576134	4.6895	4.88501	0.0580965	0.594607
FBgn0023495	0.760383	2.41245	4.87694	0.0581063	0.594607
FBgn0033313	-0.341129	6.17766	4.87359	0.058175	0.594607
FBgn0035113	-0.390811	2.36181	4.87327	0.0581817	0.594607
FBgn0033474	-0.188778	4.76072	4.87197	0.0582085	0.594607
FBgn0264691	0.208959	4.31153	4.87038	0.0582412	0.594607
FBgn0039852	-3.51354	5.23449	5.04498	0.0582442	0.594607
FBgn0027579	-0.20581	6.82372	4.86643	0.0583228	0.594607
FBgn0038873	-1.27432	2.97087	4.98854	0.0583591	0.594607
FBgn0037894	0.255186	6.0833	4.8598	0.0584599	0.594607
FBgn0033842	-0.183366	3.23444	4.8577	0.0585033	0.594607
FBgn0037708	0.371641	3.21309	4.85656	0.058527	0.594607
FBgn0051028	-0.535952	4.34678	4.856	0.0585387	0.594607
FBgn0031097	-0.845562	8.74855	4.94966	0.0586072	0.594607
FBgn0003447	-0.864759	4.91216	4.94217	0.0586335	0.594607
FBgn0266918	-0.2843	3.85951	4.84598	0.0587468	0.594607
FBgn0030593	0.521557	7.8515	4.84322	0.0588045	0.594607
FBgn0024293	0.282886	6.03341	4.83997	0.0588722	0.594607
FBgn0000116	0.513665	10.7428	4.84456	0.0590451	0.594607
FBgn0039272	-1.32026	3.7006	4.98692	0.0590596	0.594607
FBgn0003930	1.51542	3.87154	5.00334	0.0590603	0.594607
FBgn0052687	0.268237	7.34919	4.82832	0.0591165	0.594607
FBgn0036397	-0.244481	3.00573	4.82811	0.0591208	0.594607
FBgn0039149	0.306494	1.18734	4.8201	0.0592895	0.594607
FBgn0004066	-0.173839	6.72908	4.80975	0.0595081	0.594607
FBgn0083003	1.05355	4.33559	4.93152	0.0595755	0.594607
FBgn0264785	-0.227736	4.91472	4.80455	0.0596184	0.594607
FBgn0037606	-0.149376	4.41416	4.7999	0.0597172	0.594607
FBgn0031217	-0.275124	5.48199	4.79548	0.0598115	0.594607
FBgn0030245	-0.224321	6.08294	4.79495	0.0598227	0.594607
FBgn0038583	-0.252988	2.12102	4.79458	0.0598307	0.594607
FBgn0043853	0.400655	6.76755	4.79377	0.059848	0.594607
FBgn0087013	0.295518	9.27524	4.79244	0.0598762	0.594607
FBgn0030995	0.400106	1.24125	4.788	0.0599711	0.594607
FBgn0032751	-0.375517	0.942156	4.78558	0.060023	0.594607
FBgn0033121	-0.262935	4.7404	4.7844	0.0600483	0.594607
FBgn0038585	0.305866	4.98962	4.78429	0.0600507	0.594607
FBgn0023527	0.404482	5.12522	4.77483	0.0602538	0.594607
FBgn0034782	-0.431785	1.15371	4.77471	0.0602564	0.594607
FBgn0030587	-2.62958	3.3427	4.94077	0.060315	0.594607
FBgn0003209	0.305807	5.76232	4.7689	0.0603817	0.594607
FBgn0030870	-0.622661	5.57189	4.79526	0.0604129	0.594607
FBgn0037814	-0.217387	3.90815	4.7673	0.0604163	0.594607
FBgn0039626	-0.269019	2.77985	4.76438	0.0604794	0.594607
FBgn0035260	-1.21623	1.86062	4.81554	0.0605605	0.594607
FBgn0032120	-0.26492	6.62516	4.7603	0.0605676	0.594607
FBgn0040393	1.18704	5.78347	4.90894	0.0606492	0.594607
FBgn0025393	0.706618	4.50667	4.79817	0.0607238	0.594607
FBgn0030038	-0.570484	6.63164	4.75913	0.0607373	0.594607
FBgn0263006	0.123333	11.6354	4.75075	0.060775	0.594607
FBgn0037852	-0.98284	4.41809	4.86182	0.0608097	0.594607
FBgn0030099	0.158902	3.37726	4.74632	0.0608715	0.594607
FBgn0032210	-0.203945	4.5424	4.74138	0.0609795	0.594607
FBgn0031580	0.461094	6.58328	4.74011	0.0610072	0.594607
FBgn0261588	0.42865	1.54197	4.73508	0.0611173	0.594607
FBgn0035964	0.297604	6.53879	4.72893	0.0612524	0.594607
FBgn0025641	-1.23607	5.27817	4.88082	0.0613181	0.594607
FBgn0036227	0.296192	8.42706	4.72564	0.0613246	0.594607
FBgn0030968	0.447894	6.47259	4.72491	0.0613407	0.594607
FBgn0031051	0.222661	5.5398	4.72121	0.0614223	0.594607
FBgn0037022	-0.157119	4.01175	4.71869	0.061478	0.594607
FBgn0262035	0.250387	5.76226	4.71787	0.061496	0.594607
FBgn0036646	-0.568601	1.31184	4.71696	0.0615162	0.594607
FBgn0052626	-0.363582	6.69984	4.71537	0.0615514	0.594607
FBgn0032590	0.717965	2.02848	4.70961	0.0616789	0.594607
FBgn0031424	-0.39305	4.53848	4.70944	0.0616827	0.594607
FBgn0037960	0.540319	2.85037	4.70872	0.0616988	0.594607
FBgn0037763	-1.34235	2.35492	4.80041	0.0617964	0.594607
FBgn0035936	-1.01466	6.41517	4.82179	0.0618405	0.594607
FBgn0035542	0.349687	5.22659	4.70201	0.0618478	0.594607
FBgn0010620	-0.190061	5.68883	4.70179	0.0618527	0.594607
FBgn0031568	-1.09552	2.69726	4.77387	0.0619139	0.594607
FBgn0086661	1.78384	7.49718	4.84985	0.0622006	0.594607
FBgn0026533	-0.210736	6.55605	4.6855	0.0622166	0.594607
FBgn0034545	-3.74864	4.43149	4.84792	0.0622414	0.594607
FBgn0038923	0.241924	5.26249	4.68383	0.0622542	0.594607
FBgn0034292	0.220293	5.83827	4.68314	0.0622696	0.594607
FBgn0031456	0.153443	3.99694	4.68305	0.0622715	0.594607
FBgn0036916	0.200123	4.2316	4.68199	0.0622954	0.594607
FBgn0015577	0.334914	6.59438	4.68184	0.0622987	0.594607
FBgn0037044	-1.13449	5.53825	4.82228	0.0623111	0.594607
FBgn0028895	-0.464711	0.780967	4.6796	0.0623491	0.594607
FBgn0010470	-0.894453	7.92152	4.77014	0.0623687	0.594607
FBgn0050377	-0.865551	4.70966	4.7563	0.0626264	0.594607
FBgn0031950	0.177677	6.26826	4.66698	0.0626338	0.594607
FBgn0004363	0.155664	11.1936	4.66192	0.0627483	0.594607
FBgn0000179	0.43699	2.88244	4.65867	0.062822	0.594607
FBgn0032811	-1.04506	3.60457	4.7599	0.0629483	0.594607
FBgn0034110	0.248191	4.76866	4.65173	0.06298	0.594607
FBgn0030447	0.288049	4.9385	4.64054	0.0632355	0.594607
FBgn0043455	-0.324435	3.47543	4.64025	0.0632421	0.594607
FBgn0033188	0.537272	6.36231	4.64011	0.0632453	0.594607
FBgn0037552	0.267965	4.68944	4.63768	0.0633011	0.594607
FBgn0034242	-0.198703	4.43194	4.63607	0.0633381	0.594607
FBgn0032341	-0.182201	5.47087	4.63523	0.0633573	0.594607
FBgn0024509	0.168026	6.61688	4.63286	0.0634116	0.594607
FBgn0037911	-0.298265	4.28558	4.63114	0.0634513	0.594607
FBgn0031713	0.254307	5.72277	4.63052	0.0634655	0.594607
FBgn0050438	-1.35415	4.50508	4.78869	0.0635126	0.594607
FBgn0037099	-2.95584	4.01182	4.78596	0.063572	0.594607
FBgn0021874	0.232724	4.76406	4.62441	0.0636062	0.594607
FBgn0032224	-0.231165	4.28852	4.62169	0.0636691	0.594607
FBgn0034791	-0.181331	4.9056	4.61939	0.0637222	0.594607
FBgn0024362	0.162412	5.19771	4.61694	0.063779	0.594607
FBgn0030805	-2.41004	3.7142	4.76956	0.0639303	0.594607
FBgn0038641	-0.365581	3.19049	4.60286	0.064106	0.594607
FBgn0051523	-0.666822	7.67313	4.63656	0.0641194	0.594607
FBgn0039178	0.589153	3.10629	4.60029	0.0641659	0.594607
FBgn0029718	0.233645	5.91529	4.59781	0.0642238	0.594607
FBgn0266464	-0.264387	5.75026	4.59674	0.0642488	0.594607
FBgn0010611	-0.465183	7.35692	4.59272	0.0643428	0.594607
FBgn0032456	0.264524	8.30923	4.59133	0.0643754	0.594607
FBgn0030993	0.277132	5.22563	4.59052	0.0643943	0.594607
FBgn0038536	0.225554	3.82033	4.58412	0.0645446	0.594607
FBgn0031566	-0.253115	4.3628	4.58116	0.0646142	0.594607
FBgn0264324	0.448485	3.79817	4.58072	0.0646245	0.594607
FBgn0034913	0.319138	4.42262	4.57924	0.0646594	0.594607
FBgn0039111	-0.497789	4.70462	4.57593	0.0647374	0.594607
FBgn0024320	-0.305817	6.28927	4.5718	0.064835	0.594607
FBgn0027329	0.143793	8.11023	4.57101	0.0648536	0.594607
FBgn0266409	-0.186951	4.92608	4.57073	0.0648603	0.594607
FBgn0062442	0.299515	6.95968	4.56724	0.0649428	0.594607
FBgn0023515	-0.381237	1.12756	4.5668	0.0649535	0.594607
FBgn0037956	0.505781	4.6584	4.56637	0.0649635	0.594607
FBgn0263476	1.11128	4.43502	4.69188	0.0650038	0.594607
FBgn0261479	0.264404	5.25222	4.56205	0.0650661	0.594607
FBgn0036316	0.431375	7.14768	4.5591	0.0651363	0.594607
FBgn0035699	-0.321525	1.70426	4.55631	0.0652025	0.594607
FBgn0011818	-0.212953	4.11344	4.5548	0.0652387	0.594607
FBgn0037753	-1.54282	3.41979	4.70945	0.0652666	0.594607
FBgn0028506	-0.239407	3.37028	4.55263	0.0652903	0.594607
FBgn0037537	-0.574965	6.5034	4.5629	0.0653223	0.594607
FBgn0038251	-0.276065	2.79368	4.54964	0.0653617	0.594607
FBgn0027581	-0.715008	1.32308	4.54543	0.0654623	0.594607
FBgn0040066	0.201897	3.89862	4.53849	0.0656288	0.594607
FBgn0031883	-0.281487	5.70647	4.53818	0.0656362	0.594607
FBgn0051559	-1.44164	2.64138	4.65644	0.0656606	0.594607
FBgn0003268	-0.221808	3.14122	4.53579	0.0656936	0.594607
FBgn0028949	-0.430765	3.54099	4.53419	0.0657322	0.594607
FBgn0031461	-0.331305	5.02442	4.53293	0.0657624	0.594607
FBgn0042083	-0.173252	6.27837	4.53087	0.0658121	0.594607
FBgn0030257	0.281527	3.63644	4.52988	0.0658359	0.594607
FBgn0038053	0.556361	3.50817	4.52932	0.0658494	0.594607
FBgn0086355	0.213625	9.26473	4.52893	0.0658589	0.594607
FBgn0023545	0.308231	4.43138	4.52741	0.0658956	0.594607
FBgn0043575	0.437484	4.95549	4.52697	0.0659062	0.594607
FBgn0025463	0.170455	5.18026	4.52519	0.0659493	0.594607
FBgn0034197	0.322698	5.81631	4.52201	0.0660262	0.594607
FBgn0036512	-0.306113	4.96247	4.52132	0.0660427	0.594607
FBgn0002791	-0.174319	4.30371	4.52028	0.066068	0.594607
FBgn0038912	-0.199256	3.79975	4.51535	0.0661876	0.594607
FBgn0045063	-0.403171	4.9442	4.5127	0.0662518	0.594607
FBgn0031872	0.262551	2.63298	4.5082	0.0663613	0.594607
FBgn0017561	-0.264213	3.31437	4.50759	0.0663763	0.594607
FBgn0051713	0.264354	4.13742	4.50728	0.0663837	0.594607
FBgn0264775	-0.336426	3.77472	4.50574	0.0664213	0.594607
FBgn0250814	0.20515	9.10013	4.50176	0.0665185	0.594607
FBgn0001124	0.196248	8.4017	4.50082	0.0665414	0.594607
FBgn0038438	-0.150616	5.06187	4.49739	0.0666253	0.594607
FBgn0000251	-0.254193	4.21214	4.4971	0.0666325	0.594607
FBgn0035607	0.375815	5.55564	4.49425	0.0667023	0.594607
FBgn0032284	0.905701	2.82803	4.53771	0.0667514	0.594607
FBgn0035057	-0.818156	2.40707	4.49867	0.0668163	0.594607
FBgn0023129	-0.380798	6.06284	4.48954	0.066818	0.594607
FBgn0029523	-0.385252	0.740089	4.48878	0.0668367	0.594607
FBgn0037534	-1.95967	7.23326	4.63963	0.066865	0.594607
FBgn0266369	0.218229	8.09705	4.48057	0.067039	0.594607
FBgn0038468	-3.60945	4.94181	4.63131	0.0670588	0.594607
FBgn0014143	-0.630086	-0.00972477	4.47846	0.067091	0.594607
FBgn0037182	-0.207428	6.66745	4.47517	0.0671724	0.594607
FBgn0027082	0.175451	3.66166	4.4738	0.0672061	0.594607
FBgn0036039	-0.19248	4.03929	4.46792	0.0673519	0.594607
FBgn0038143	-0.535714	1.15948	4.46739	0.0673651	0.594607
FBgn0011660	-0.264073	3.50983	4.46656	0.0673859	0.594607
FBgn0030597	0.394761	0.302812	4.46499	0.0674247	0.594607
FBgn0051467	-0.448117	0.382166	4.46404	0.0674484	0.594607
FBgn0033994	-0.385856	1.0394	4.46237	0.0674901	0.594607
FBgn0003308	0.42935	4.64569	4.45481	0.0676786	0.594607
FBgn0039611	0.211643	5.33851	4.45332	0.0677158	0.594607
FBgn0052633	0.270966	7.60867	4.4505	0.0677863	0.594607
FBgn0038925	0.168363	7.1386	4.44854	0.0678354	0.594607
FBgn0004368	0.227849	5.51065	4.44807	0.0678473	0.594607
FBgn0032130	0.377212	4.31047	4.44336	0.0679653	0.594607
FBgn0033427	-0.247025	2.80695	4.44134	0.0680162	0.594607
FBgn0003086	-0.406819	6.21832	4.43868	0.0680831	0.594607
FBgn0030959	-0.224872	3.57984	4.43848	0.0680881	0.594607
FBgn0085311	0.444964	8.69247	4.43692	0.0681274	0.594607
FBgn0030082	0.159604	3.75535	4.43342	0.0682156	0.594607
FBgn0032748	0.298204	3.94791	4.42896	0.0683282	0.594607
FBgn0035522	-3.01557	3.57159	4.57663	0.0683514	0.594607
FBgn0037051	0.229261	7.12832	4.4214	0.0685198	0.594607
FBgn0061198	0.326509	3.49984	4.41602	0.0686567	0.594607
FBgn0086680	-0.696813	5.65539	4.46065	0.0688138	0.594607
FBgn0037203	0.458476	5.50343	4.40793	0.0688629	0.594607
FBgn0035802	-0.640791	4.89426	4.43734	0.0689294	0.594607
FBgn0052594	0.298111	4.79639	4.40496	0.0689387	0.594607
FBgn0003435	-0.508553	5.19654	4.40044	0.0690545	0.594607
FBgn0036427	-2.59572	3.41456	4.54353	0.0691496	0.594607
FBgn0019662	-0.17118	4.62637	4.39465	0.069203	0.594607
FBgn0034734	0.32042	6.06966	4.39243	0.0692602	0.594607
FBgn0004854	-0.472869	0.779725	4.39082	0.0693017	0.594607
FBgn0033981	0.306839	5.58982	4.38654	0.069412	0.594607
FBgn0035229	-0.496782	4.68369	4.38273	0.0695105	0.594607
FBgn0028507	-0.156242	4.36622	4.38272	0.0695108	0.594607
FBgn0032700	-0.193953	3.75754	4.38248	0.0695169	0.594607
FBgn0051100	-0.557363	5.21156	4.39279	0.0695344	0.594607
FBgn0028572	-0.404813	4.1463	4.37391	0.0697389	0.594607
FBgn0265937	-0.542746	0.706941	4.37152	0.069801	0.594607
FBgn0036828	-0.184703	4.69924	4.37033	0.069832	0.594607
FBgn0036615	0.214348	3.77413	4.36815	0.0698889	0.594607
FBgn0043903	0.248455	4.70872	4.36659	0.0699294	0.594607
FBgn0032394	-0.969303	6.3123	4.47126	0.069934	0.594607
FBgn0034553	0.595967	4.73533	4.38538	0.0700021	0.594607
FBgn0037000	-0.484141	5.25434	4.36372	0.0700043	0.594607
FBgn0036134	0.154239	4.72834	4.36355	0.0700087	0.594607
FBgn0036279	0.415457	5.89787	4.36341	0.0700124	0.594607
FBgn0263468	1.01251	3.58843	4.45887	0.0700192	0.594607
FBgn0035438	0.264495	7.15745	4.36246	0.070037	0.594607
FBgn0000499	0.196816	3.36494	4.3617	0.070057	0.594607
FBgn0266450	0.560292	2.7905	4.35973	0.0701085	0.594607
FBgn0033304	0.441502	2.96095	4.35482	0.0702368	0.594607
FBgn0003174	-1.94032	5.14119	4.49156	0.0704278	0.594607
FBgn0031800	0.462155	0.445297	4.3465	0.0704553	0.594607
FBgn0030562	-0.594255	1.21948	4.34619	0.0704635	0.594607
FBgn0038316	0.231751	3.47091	4.34607	0.0704667	0.594607
FBgn0031992	0.214643	6.31187	4.34235	0.0705646	0.594607
FBgn0038271	0.165939	9.87333	4.34202	0.0705733	0.594607
FBgn0086368	-1.52185	4.18196	4.48303	0.0706404	0.594607
FBgn0086558	0.340013	8.01943	4.33946	0.0706407	0.594607
FBgn0052267	-0.271699	5.47887	4.33864	0.0706625	0.594607
FBgn0026370	0.202966	6.71846	4.33839	0.0706692	0.594607
FBgn0026150	0.145158	7.08759	4.33709	0.0707035	0.594607
FBgn0037667	-0.20503	2.99414	4.32773	0.0709512	0.594607
FBgn0042630	-0.610382	1.86001	4.32607	0.0709954	0.594607
FBgn0032172	-0.3385	5.07566	4.32326	0.0710702	0.594607
FBgn0085261	-0.33749	5.5581	4.32317	0.0710725	0.594607
FBgn0034899	-0.923764	6.20063	4.41985	0.0710927	0.594607
FBgn0083940	-0.431241	1.49688	4.31325	0.071337	0.594607
FBgn0014031	0.349735	5.2081	4.308	0.0714777	0.594607
FBgn0026374	-0.565599	4.27294	4.31285	0.0715796	0.594607
FBgn0035666	0.510015	9.141	4.31108	0.0716272	0.594607
FBgn0035401	0.324096	4.65205	4.30184	0.0716428	0.594607
FBgn0034282	-0.183094	6.18711	4.29583	0.0718047	0.594607
FBgn0030763	-0.605464	5.62895	4.31938	0.0718745	0.594607
FBgn0053282	-0.768738	0.579271	4.29075	0.0719418	0.594607
FBgn0001187	0.718632	5.90098	4.34485	0.0719926	0.594607
FBgn0033380	-0.239094	3.47424	4.28826	0.072009	0.594607
FBgn0033753	-1.32395	4.53901	4.42832	0.0720251	0.594607
FBgn0034204	0.681292	6.68211	4.32609	0.0720955	0.594607
FBgn0010621	0.17013	8.24896	4.28485	0.0721014	0.594607
FBgn0025839	0.312061	6.80089	4.27568	0.0723505	0.594607
FBgn0038654	-0.540614	2.46482	4.27552	0.0723548	0.594607
FBgn0039648	-1.22428	2.21782	4.34544	0.0723693	0.594607
FBgn0035323	-0.204337	2.5837	4.27349	0.0724102	0.594607
FBgn0000662	-0.301361	4.83951	4.27292	0.0724257	0.594607
FBgn0031040	0.318161	4.073	4.26986	0.0725091	0.594607
FBgn0264325	-0.21857	3.67407	4.26888	0.0725358	0.594607
FBgn0036369	-0.456246	1.30265	4.26799	0.0725602	0.594607
FBgn0039758	-2.04417	3.83427	4.40704	0.0725734	0.594607
FBgn0029791	0.274662	3.7623	4.26604	0.0726134	0.594607
FBgn0019948	0.272635	5.0362	4.2625	0.0727104	0.594607
FBgn0067779	-0.309551	4.50481	4.26243	0.0727124	0.594607
FBgn0051233	0.319599	9.63212	4.26158	0.0727355	0.594607
FBgn0032022	0.652748	2.65264	4.25572	0.0728965	0.594607
FBgn0013684	-0.920456	8.40836	4.3543	0.0728994	0.594607
FBgn0037838	-1.76252	3.23578	4.39075	0.0729966	0.594607
FBgn0035040	0.162981	4.15029	4.25152	0.0730119	0.594607
FBgn0027785	0.238692	7.16489	4.24871	0.0730893	0.594607
FBgn0039294	-1.51521	0.697554	4.29189	0.0731019	0.594607
FBgn0260450	-0.737737	4.60744	4.29984	0.0732481	0.594607
FBgn0030006	0.347806	2.26213	4.24205	0.0732733	0.594607
FBgn0030354	0.194051	5.56242	4.24091	0.0733048	0.594607
FBgn0037672	-0.414247	1.63012	4.23768	0.0733944	0.594607
FBgn0031980	0.196677	10.3195	4.23557	0.073453	0.594607
FBgn0029002	-0.252656	3.05284	4.23392	0.0734989	0.594607
FBgn0031948	-0.155734	5.19253	4.23386	0.0735004	0.594607
FBgn0037142	-0.261211	4.32842	4.23095	0.0735814	0.594607
FBgn0034389	-0.555045	3.4587	4.22932	0.0736266	0.594607
FBgn0010412	0.127713	9.90587	4.22389	0.0737781	0.594607
FBgn0001083	-0.903595	5.65794	4.32003	0.0737782	0.594607
FBgn0262975	0.273684	7.96256	4.2222	0.0738253	0.594607
FBgn0085426	-0.209669	3.78463	4.22006	0.0738849	0.594607
FBgn0027565	-0.16906	3.85941	4.21722	0.0739645	0.594607
FBgn0261975	0.419565	3.86849	4.21268	0.0740919	0.594607
FBgn0053986	0.56335	2.18092	4.20793	0.0742252	0.594607
FBgn0011737	-0.176311	3.28782	4.1945	0.0746043	0.594607
FBgn0039167	-1.89914	4.77925	4.3285	0.0746446	0.594607
FBgn0036449	0.407889	4.5751	4.19301	0.0746464	0.594607
FBgn0263466	0.57287	0.708206	4.19173	0.0746827	0.594607
FBgn0030558	0.528878	5.81048	4.19728	0.0747539	0.594607
FBgn0013732	-0.285582	1.23639	4.1875	0.0748029	0.594607
FBgn0030854	-0.256079	4.95351	4.18227	0.0749515	0.594607
FBgn0010549	0.234702	5.26625	4.1811	0.0749851	0.594607
FBgn0264699	-0.274154	3.40088	4.17948	0.0750312	0.594607
FBgn0035111	-0.268485	5.25073	4.17841	0.0750618	0.594607
FBgn0029663	-0.375708	1.13043	4.17601	0.0751301	0.594607
FBgn0262730	0.438042	3.74602	4.17453	0.0751726	0.594607
FBgn0052380	-0.324027	3.35496	4.17334	0.0752065	0.594607
FBgn0034753	-0.219184	9.09693	4.17318	0.0752111	0.594607
FBgn0038799	-0.251281	5.9661	4.17123	0.075267	0.594607
FBgn0263109	-2.94342	5.06664	4.30512	0.0752761	0.594607
FBgn0083057	1.0263	2.57953	4.22045	0.0754572	0.594607
FBgn0033504	0.355509	7.52131	4.16359	0.0754863	0.594607
FBgn0040350	0.364549	4.07484	4.16337	0.0754926	0.594607
FBgn0039634	-0.147717	5.12577	4.15946	0.0756052	0.594607
FBgn0029522	0.290144	2.51891	4.15656	0.0756887	0.594607
FBgn0031374	0.239655	6.69472	4.15467	0.0757432	0.594607
FBgn0262477	-0.659815	0.188161	4.15457	0.0757462	0.594607
FBgn0034694	-0.218672	3.79549	4.14589	0.0759973	0.594607
FBgn0031976	-0.863999	0.664033	4.14273	0.0760889	0.594607
FBgn0011236	-1.17499	5.13528	4.26597	0.0761465	0.594607
FBgn0035270	-0.225521	3.53096	4.13781	0.076232	0.594607
FBgn0050418	-0.500622	0.868619	4.13705	0.0762542	0.594607
FBgn0030509	0.395517	4.70145	4.13648	0.0762708	0.594607
FBgn0030747	0.188991	6.8159	4.13614	0.0762808	0.594607
FBgn0035179	-0.469014	0.621889	4.13583	0.0762896	0.594607
FBgn0243514	0.424955	3.21386	4.13562	0.0762959	0.594607
FBgn0262886	-0.444997	1.68217	4.13334	0.0763622	0.594607
FBgn0036640	-0.326232	1.52439	4.12771	0.0765268	0.594607
FBgn0083042	0.72734	1.03968	4.12287	0.0766685	0.594607
FBgn0036978	-0.310508	3.52236	4.12224	0.0766871	0.594607
FBgn0032780	0.457229	1.15516	4.12217	0.0766891	0.594607
FBgn0001311	-0.460785	7.88941	4.11687	0.0768448	0.594607
FBgn0001325	0.653263	3.35475	4.13259	0.0768731	0.594607
FBgn0005666	0.471641	13.2561	4.1366	0.0769024	0.594607
FBgn0024556	0.142758	8.40143	4.11246	0.0769746	0.594607
FBgn0001565	0.301714	5.83011	4.11083	0.0770226	0.594607
FBgn0036789	-0.318841	3.18576	4.10987	0.0770509	0.594607
FBgn0086359	-1.944	5.73161	4.23984	0.0770767	0.594607
FBgn0035547	-2.15271	3.83807	4.23626	0.0771773	0.594607
FBgn0259707	-0.356295	1.78826	4.10495	0.0771965	0.594607
FBgn0001330	0.23472	4.20242	4.10334	0.077244	0.594607
FBgn0031895	-0.37226	2.07149	4.09696	0.0774335	0.594607
FBgn0034853	0.164827	4.31387	4.0969	0.0774352	0.594607
FBgn0267507	-1.63644	0.783914	4.15291	0.0774497	0.594607
FBgn0039207	-0.366343	5.82737	4.09352	0.0775357	0.594607
FBgn0025815	0.221393	4.20446	4.09243	0.0775679	0.594607
FBgn0033629	-0.754162	1.23332	4.08981	0.0776461	0.594607
FBgn0082966	0.88918	3.1972	4.14658	0.077675	0.594607
FBgn0051005	-0.857148	6.87505	4.1638	0.0776997	0.594607
FBgn0052404	-1.5195	2.36934	4.18879	0.0778121	0.594607
FBgn0000346	-0.40038	3.09745	4.08274	0.0778573	0.594607
FBgn0259167	-1.83101	3.05915	4.21198	0.0778626	0.594607
FBgn0032482	-0.139073	7.07317	4.08073	0.0779173	0.594607
FBgn0039110	0.144599	4.86361	4.07935	0.0779589	0.594607
FBgn0032956	-0.167397	6.46763	4.07523	0.0780822	0.594607
FBgn0037678	0.28272	7.30369	4.07251	0.0781642	0.594607
FBgn0263485	0.538411	0.392113	4.07123	0.0782025	0.594607
FBgn0038396	-0.24117	2.41642	4.06964	0.0782505	0.594607
FBgn0035203	-0.619277	5.86738	4.09948	0.0782826	0.594607
FBgn0039381	-0.404218	3.75793	4.06695	0.0783313	0.594607
FBgn0038473	0.196301	6.58572	4.06029	0.0785325	0.594607
FBgn0003607	-0.161973	5.82452	4.05755	0.0786155	0.594607
FBgn0261526	-2.22194	3.66644	4.18214	0.0787158	0.594607
FBgn0031066	0.242276	8.61863	4.05312	0.0787499	0.594607
FBgn0039581	-0.224386	5.42315	4.05238	0.0787723	0.594607
FBgn0263046	0.328132	2.70697	4.05226	0.0787762	0.594607
FBgn0011768	0.138354	7.78133	4.05075	0.0788218	0.594607
FBgn0051665	-0.460639	3.41757	4.04721	0.0789296	0.594607
FBgn0065046	1.09713	4.56383	4.15876	0.0789377	0.594607
FBgn0002031	0.127175	7.78556	4.04484	0.0790016	0.594607
FBgn0261682	0.302564	3.5629	4.04412	0.0790238	0.594607
FBgn0086898	-0.417126	2.94313	4.04037	0.0791383	0.594607
FBgn0024273	-0.490405	5.52972	4.04011	0.0791462	0.594607
FBgn0040395	-0.273513	5.2208	4.0384	0.0791983	0.594607
FBgn0023517	0.1571	4.8993	4.03579	0.0792781	0.594607
FBgn0039896	-0.974418	5.5742	4.13494	0.0793147	0.594607
FBgn0031630	-0.947957	4.45041	4.12535	0.0793551	0.594607
FBgn0037328	0.176522	9.44087	4.02919	0.0794806	0.594607
FBgn0026702	0.342127	3.26786	4.02877	0.0794935	0.594607
FBgn0010381	2.29797	1.09451	4.14111	0.0795566	0.594607
FBgn0028686	-0.260629	6.55836	4.02584	0.0795838	0.594607
FBgn0000409	0.338373	10.0731	4.02203	0.079701	0.594607
FBgn0032082	0.602728	1.48345	4.02162	0.0797136	0.594607
FBgn0019936	0.278798	9.85802	4.02133	0.0797228	0.594607
FBgn0040308	0.149682	5.79899	4.01717	0.0798512	0.594607
FBgn0051102	0.257278	3.32375	4.01298	0.0799807	0.594607
FBgn0086350	-0.444753	0.579489	4.01103	0.0800412	0.594607
FBgn0017579	0.203233	10.088	4.01046	0.0800587	0.594607
FBgn0003134	-0.177669	5.52485	4.01005	0.0800716	0.594607
FBgn0032725	-0.183703	5.76736	4.00627	0.0801888	0.594607
FBgn0034142	-1.18935	7.24846	4.12431	0.0801995	0.594607
FBgn0038207	-1.21096	3.91274	4.12202	0.0802245	0.594607
FBgn0003345	0.216546	5.969	3.99633	0.0804987	0.594607
FBgn0086130	0.130399	4.33443	3.9885	0.0807435	0.594607
FBgn0052057	-0.374385	2.1913	3.98824	0.0807518	0.594607
FBgn0023537	0.275629	9.73784	3.98298	0.0809168	0.594607
FBgn0086778	-0.381818	2.51281	3.98008	0.0810083	0.594607
FBgn0031734	-1.42021	6.41503	4.10369	0.0810183	0.594607
FBgn0039848	-0.749986	0.611958	3.97798	0.0810742	0.594607
FBgn0027498	0.243849	2.9806	3.97729	0.0810959	0.594607
FBgn0051211	-0.337888	4.27851	3.97446	0.0811853	0.594607
FBgn0035707	0.220478	5.44147	3.97314	0.081227	0.594607
FBgn0051832	-0.457586	3.01676	3.97243	0.0812495	0.594607
FBgn0023001	0.259889	4.61734	3.97054	0.0813093	0.594607
FBgn0037146	-0.170879	7.08294	3.96926	0.0813496	0.594607
FBgn0023083	0.217358	6.08983	3.96862	0.0813702	0.594607
FBgn0037341	-0.424053	5.56944	3.96847	0.0813747	0.594607
FBgn0026250	-0.232983	8.40456	3.96501	0.0814846	0.594607
FBgn0026787	-0.151719	4.64643	3.96333	0.0815376	0.594607
FBgn0263782	-0.711816	6.86384	4.00918	0.0816354	0.594607
FBgn0020258	-0.39973	2.1076	3.95742	0.0817258	0.594607
FBgn0039473	0.467389	6.6396	3.95613	0.0817669	0.594607
FBgn0036262	0.58217	6.14336	3.97426	0.0818353	0.594607
FBgn0010397	0.316716	8.04585	3.95166	0.0819093	0.594607
FBgn0031384	-0.289536	1.90324	3.95137	0.0819186	0.594607
FBgn0082919	-0.704005	0.119128	3.95042	0.0819491	0.594607
FBgn0000479	0.39828	6.6052	3.93969	0.0822928	0.594607
FBgn0020416	0.335618	5.23213	3.93879	0.0823217	0.594607
FBgn0052354	-1.80906	3.01273	4.06039	0.0823272	0.594607
FBgn0029824	0.538749	2.68073	3.93713	0.0823753	0.594607
FBgn0052407	1.10788	4.94298	4.04707	0.0824035	0.594607
FBgn0032216	-0.253435	6.7504	3.9355	0.0824276	0.594607
FBgn0038419	-0.222997	3.98728	3.93464	0.0824555	0.594607
FBgn0260407	0.177972	4.95861	3.93382	0.0824819	0.594607
FBgn0011742	-0.230016	6.37421	3.93213	0.0825362	0.594607
FBgn0038292	0.281799	6.74258	3.93112	0.0825687	0.594607
FBgn0261610	-0.411583	2.29521	3.93014	0.0826006	0.594607
FBgn0266418	-0.552704	5.13245	3.94539	0.0826065	0.594607
FBgn0263755	0.246241	2.8574	3.92481	0.0827729	0.594607
FBgn0050005	-0.200135	4.70737	3.9238	0.0828054	0.594607
FBgn0001332	0.253453	4.61029	3.92171	0.0828732	0.594607
FBgn0261999	-0.194477	5.96192	3.91968	0.0829391	0.594607
FBgn0032032	-0.340306	3.23065	3.91831	0.0829835	0.594607
FBgn0036382	-1.79625	3.01066	4.03731	0.0830363	0.594607
FBgn0263470	0.880671	8.49503	4.00215	0.0830452	0.594607
FBgn0266521	-0.188417	4.20753	3.90969	0.0832642	0.594607
FBgn0052641	0.29041	2.63597	3.90305	0.0834811	0.594607
FBgn0051999	-0.212423	5.58334	3.90141	0.0835349	0.594607
FBgn0062449	-0.145954	3.85532	3.90084	0.0835536	0.594607
FBgn0014879	-0.24512	5.33926	3.89801	0.0836463	0.594607
FBgn0050394	-0.267293	4.2799	3.89034	0.0838987	0.594607
FBgn0030672	0.227056	8.05976	3.88896	0.0839441	0.594607
FBgn0000046	0.37346	9.38576	3.88883	0.0839484	0.594607
FBgn0031195	-0.768815	5.35094	3.94925	0.084054	0.594607
FBgn0039089	-0.434415	0.303541	3.88541	0.084061	0.594607
FBgn0027600	-0.342458	6.10219	3.8832	0.0841343	0.594607
FBgn0037186	0.562648	4.27048	3.89717	0.0841721	0.594607
FBgn0260745	-0.577547	6.86952	3.90075	0.0841879	0.594607
FBgn0260959	-0.206774	3.7942	3.87496	0.084407	0.594607
FBgn0039864	-0.549388	0.200747	3.87394	0.084441	0.594607
FBgn0035833	-0.219632	4.80029	3.87282	0.0844782	0.594607
FBgn0261872	-0.165723	4.45964	3.87244	0.0844909	0.594607
FBgn0050404	-0.169703	5.48362	3.87134	0.0845275	0.594607
FBgn0035578	-0.774799	1.05285	3.86889	0.084609	0.594607
FBgn0025621	0.141188	5.33581	3.86685	0.0846769	0.594607
FBgn0001259	0.698523	2.01397	3.86361	0.0847851	0.594607
FBgn0027590	0.315693	7.11676	3.86295	0.0848072	0.594607
FBgn0030925	0.179579	4.3381	3.86294	0.0848077	0.594607
FBgn0002719	-0.331747	9.56561	3.85308	0.0851376	0.594607
FBgn0035523	-0.334948	5.32713	3.85301	0.0851401	0.594607
FBgn0032218	0.134083	6.13501	3.85292	0.085143	0.594607
FBgn0035763	0.141151	5.86784	3.85258	0.0851545	0.594607
FBgn0031773	-0.642636	4.36883	3.88294	0.085196	0.594607
FBgn0027087	0.148297	6.66764	3.8506	0.085221	0.594607
FBgn0266347	-0.19608	3.44779	3.84962	0.0852539	0.594607
FBgn0003257	0.147913	5.57943	3.84949	0.0852582	0.594607
FBgn0031561	0.637845	9.36578	3.89693	0.0852779	0.594607
FBgn0029768	-0.540256	1.57061	3.84858	0.0852889	0.594607
FBgn0087021	-0.320515	1.26541	3.84779	0.0853156	0.594607
FBgn0036996	0.943519	7.46113	3.9312	0.0854117	0.594607
FBgn0019925	-0.298791	7.88583	3.84258	0.0854911	0.594607
FBgn0039359	0.239332	10.2135	3.84202	0.0855101	0.594607
FBgn0051184	-0.2163	4.07603	3.84097	0.0855454	0.594607
FBgn0040907	0.381971	5.21842	3.83896	0.0856134	0.594607
FBgn0004133	0.220054	2.77031	3.83731	0.0856694	0.594607
FBgn0032447	-0.498408	0.591306	3.83699	0.08568	0.594607
FBgn0023479	0.223059	7.85605	3.8369	0.0856832	0.594607
FBgn0262608	0.691569	3.7644	3.86429	0.0859461	0.594607
FBgn0034145	-1.82117	6.00974	3.94495	0.0859555	0.594607
FBgn0036754	0.217079	3.53702	3.82647	0.0860371	0.594607
FBgn0032298	0.21103	5.62814	3.82547	0.0860711	0.594607
FBgn0025687	0.319663	7.38154	3.82507	0.0860848	0.594607
FBgn0036769	-0.736022	4.57547	3.87818	0.0860889	0.594607
FBgn0025373	-0.157524	5.23222	3.82469	0.0860979	0.594607
FBgn0034391	-1.97562	5.43712	3.94023	0.0861082	0.594607
FBgn0028468	-0.334325	4.27651	3.82298	0.0861561	0.594607
FBgn0044030	0.220561	4.06863	3.82137	0.086211	0.594607
FBgn0266098	0.760135	0.80536	3.82054	0.0862394	0.594607
FBgn0027525	0.246747	6.11599	3.8185	0.086309	0.594607
FBgn0003118	0.319609	4.23583	3.81655	0.0863757	0.594607
FBgn0036144	-0.209088	3.90455	3.8138	0.0864698	0.594607
FBgn0034903	-1.09758	4.85621	3.91938	0.0864925	0.594607
FBgn0082954	0.952442	1.27737	3.81664	0.0865141	0.594607
FBgn0035977	0.703204	2.70352	3.81851	0.0866035	0.594607
FBgn0037409	-2.51099	3.85914	3.92484	0.086609	0.594607
FBgn0083973	0.819409	0.212288	3.80957	0.0866147	0.594607
FBgn0040255	-0.926653	1.74755	3.822	0.0866906	0.594607
FBgn0031078	0.145491	6.0062	3.80645	0.0867221	0.594607
FBgn0032014	-0.384872	4.24366	3.80437	0.0867936	0.594607
FBgn0086904	0.146692	9.4311	3.80176	0.0868837	0.594607
FBgn0041582	0.190931	4.83553	3.80009	0.0869412	0.594607
FBgn0037094	-0.294651	5.98272	3.79935	0.0869665	0.594607
FBgn0039277	-0.270748	1.42556	3.79779	0.0870204	0.594607
FBgn0034988	0.203958	4.98023	3.79748	0.0870313	0.594607
FBgn0014029	-0.268872	5.10938	3.79518	0.0871106	0.594607
FBgn0040666	0.292965	4.57578	3.79451	0.087134	0.594607
FBgn0030598	-2.1459	3.35823	3.90854	0.0871432	0.594607
FBgn0034400	0.259361	6.2329	3.79241	0.0872064	0.594607
FBgn0017429	0.135741	5.32885	3.79102	0.0872548	0.594607
FBgn0005564	-0.326436	3.6007	3.78939	0.0873111	0.594607
FBgn0039728	-0.940941	5.75041	3.87946	0.0873163	0.594607
FBgn0020906	0.299085	9.52459	3.7881	0.087356	0.594607
FBgn0011556	0.368236	7.16197	3.78703	0.0873931	0.594607
FBgn0085433	-0.391457	2.96251	3.78535	0.0874514	0.594607
FBgn0027558	-0.911396	4.9103	3.86904	0.087458	0.594607
FBgn0039735	0.251717	7.39687	3.78357	0.0875133	0.594607
FBgn0051935	-0.265096	3.83617	3.78126	0.0875939	0.594607
FBgn0024989	-0.752438	8.97279	3.84762	0.0875945	0.594607
FBgn0040298	-0.21064	2.14689	3.78012	0.0876336	0.594607
FBgn0034974	-1.39235	5.59013	3.886	0.0878896	0.594607
FBgn0037163	0.543775	2.15426	3.77229	0.0879071	0.594607
FBgn0037703	0.165281	3.57812	3.77184	0.0879227	0.594607
FBgn0030776	0.390712	6.94454	3.77093	0.0879545	0.594607
FBgn0004595	0.304263	3.26428	3.77066	0.0879641	0.594607
FBgn0004168	-0.288121	2.06782	3.76712	0.088088	0.594607
FBgn0053143	-0.549093	1.44026	3.76507	0.0881602	0.594607
FBgn0038250	0.34092	4.62748	3.76477	0.0881706	0.594607
FBgn0033649	0.414133	3.21771	3.76305	0.0882313	0.594607
FBgn0032230	-0.301156	3.73333	3.75599	0.0884796	0.594607
FBgn0259230	0.540011	6.17806	3.76607	0.0886278	0.594607
FBgn0032445	-0.21973	3.25441	3.75127	0.0886466	0.594607
FBgn0032480	-0.315088	6.17215	3.74795	0.0887641	0.594607
FBgn0035249	-0.195313	2.81767	3.74788	0.0887667	0.594607
FBgn0031759	0.362535	5.76472	3.74619	0.0888264	0.594607
FBgn0020235	0.18425	9.46619	3.74589	0.088837	0.594607
FBgn0031830	0.265447	8.99927	3.74589	0.0888372	0.594607
FBgn0052656	0.552354	5.21921	3.76197	0.0889068	0.594607
FBgn0087002	0.296169	14.2125	3.74352	0.0889213	0.594607
FBgn0040923	0.424727	3.49211	3.7425	0.0889576	0.594607
FBgn0013676	-0.451546	12.9564	3.76018	0.088986	0.594607
FBgn0039828	0.285093	5.35618	3.7414	0.0889964	0.594607
FBgn0250862	-1.32634	4.53183	3.84828	0.0891572	0.594607
FBgn0034968	0.118852	10.2882	3.73451	0.0892421	0.594607
FBgn0034075	-0.194741	6.77114	3.73448	0.0892429	0.594607
FBgn0036053	-0.207903	5.82823	3.7342	0.0892531	0.594607
FBgn0261830	0.778222	-0.0622813	3.7327	0.0893066	0.594607
FBgn0025643	0.283039	7.6372	3.73224	0.0893232	0.594607
FBgn0033366	0.175052	6.50499	3.73002	0.0894026	0.594607
FBgn0035552	0.94036	7.58293	3.81265	0.0894277	0.594607
FBgn0267519	2.76593	6.04679	3.83989	0.0894424	0.594607
FBgn0030884	-0.875807	5.59137	3.80637	0.0895515	0.594607
FBgn0052226	-0.135661	3.87228	3.72555	0.0895626	0.594607
FBgn0031055	0.390607	4.65574	3.72543	0.0895668	0.594607
FBgn0082995	0.832593	3.14123	3.76915	0.089638	0.594607
FBgn0037941	-0.477941	1.38319	3.72313	0.0896492	0.594607
FBgn0265623	0.236157	3.96202	3.72213	0.0896853	0.594607
FBgn0036680	0.755423	0.594135	3.72124	0.0897173	0.594607
FBgn0014022	0.164131	3.63026	3.71704	0.0898683	0.594607
FBgn0267733	-0.362435	1.42324	3.71458	0.0899567	0.594607
FBgn0260750	0.135281	5.45614	3.71364	0.0899907	0.594607
FBgn0015546	-0.27851	2.71485	3.70613	0.0902621	0.594607
FBgn0027556	0.204207	8.89214	3.70467	0.090315	0.594607
FBgn0037723	0.323121	7.15908	3.70454	0.0903199	0.594607
FBgn0033273	-0.291066	1.55801	3.70164	0.0904249	0.594607
FBgn0036350	-3.1531	3.73599	3.81016	0.0904629	0.594607
FBgn0265836	-1.60184	2.87163	3.80763	0.0905505	0.594607
FBgn0032136	0.26918	10.1363	3.69789	0.0905611	0.594607
FBgn0260856	-0.166388	3.86506	3.69741	0.0905786	0.594607
FBgn0034245	0.431564	8.19663	3.69712	0.0905892	0.594607
FBgn0035985	0.795472	6.78632	3.75691	0.0906662	0.594607
FBgn0031969	0.162242	5.89921	3.69465	0.0906792	0.594607
FBgn0029893	0.195257	5.06572	3.69396	0.0907041	0.594607
FBgn0038407	0.280037	6.47918	3.69034	0.0908363	0.594607
FBgn0023477	0.252609	9.62936	3.6866	0.0909729	0.594607
FBgn0037351	0.129131	10.6212	3.68526	0.091022	0.594607
FBgn0036301	0.228028	3.87417	3.68514	0.0910263	0.594607
FBgn0031249	0.590903	9.12376	3.71774	0.0911006	0.594607
FBgn0265959	-0.25932	2.26157	3.68286	0.0911101	0.594607
FBgn0082994	1.03775	2.27342	3.72654	0.0911654	0.594607
FBgn0264998	1.21388	3.20624	3.77373	0.0911728	0.594607
FBgn0086365	-0.295528	4.19323	3.67852	0.0912694	0.594607
FBgn0000229	-0.186286	5.77865	3.6746	0.0914135	0.594607
FBgn0052091	0.961328	3.05104	3.73489	0.0914294	0.594607
FBgn0043791	-1.17723	2.46325	3.73986	0.0914314	0.594607
FBgn0031401	0.25528	6.21552	3.67387	0.0914402	0.594607
FBgn0033540	0.182309	4.87932	3.67352	0.0914532	0.594607
FBgn0039157	-0.334384	3.83563	3.67264	0.0914855	0.594607
FBgn0032252	-0.338713	4.72279	3.67258	0.0914878	0.594607
FBgn0037754	-0.540431	1.86136	3.67151	0.0915273	0.594607
FBgn0027950	-0.189612	2.63921	3.66899	0.0916203	0.594607
FBgn0037757	-0.277222	4.03015	3.66895	0.0916217	0.594607
FBgn0003392	-0.145451	6.61335	3.66833	0.0916445	0.594607
FBgn0036133	-0.163025	5.91322	3.66558	0.0917463	0.594607
FBgn0250785	-0.294828	5.28171	3.66299	0.0918419	0.594607
FBgn0000636	-0.300631	6.29239	3.6615	0.0918971	0.594607
FBgn0259716	0.302672	4.51451	3.66131	0.0919043	0.594607
FBgn0038273	-0.810235	0.764523	3.66043	0.091937	0.594607
FBgn0083027	1.10364	6.15638	3.7602	0.0920022	0.594607
FBgn0030774	0.326015	6.7774	3.65819	0.09202	0.594607
FBgn0038426	0.256722	4.99447	3.65585	0.092107	0.594607
FBgn0053926	0.571053	2.9342	3.65462	0.0921527	0.594607
FBgn0010113	0.703085	5.27068	3.70242	0.0921936	0.594607
FBgn0052694	-0.832687	6.96224	3.72009	0.0922217	0.594607
FBgn0032516	-0.425335	2.85767	3.65077	0.092296	0.594607
FBgn0032330	0.257806	5.07474	3.65041	0.0923095	0.594607
FBgn0038917	0.372239	1.03557	3.64908	0.0923592	0.594607
FBgn0040778	-0.399045	0.858039	3.6475	0.092418	0.594607
FBgn0031190	1.05103	7.38143	3.73915	0.0924946	0.594607
FBgn0039789	-0.587294	5.59216	3.67154	0.0925109	0.594607
FBgn0086445	-0.347085	1.68289	3.64454	0.0925287	0.594607
FBgn0035878	0.231194	5.8363	3.64123	0.0926525	0.594607
FBgn0051997	-0.27293	7.81003	3.63816	0.0927675	0.594607
FBgn0035425	0.14626	4.72696	3.63755	0.0927905	0.594607
FBgn0010044	0.899618	3.37286	3.69516	0.0929018	0.594607
FBgn0050491	-0.154886	4.37893	3.63375	0.0929333	0.594607
FBgn0040079	-0.310669	3.73417	3.63331	0.0929498	0.594607
FBgn0259170	-0.272876	5.85798	3.63304	0.0929601	0.594607
FBgn0034496	0.201924	4.88516	3.6317	0.0930104	0.594607
FBgn0041164	-0.152661	3.86753	3.63043	0.0930582	0.594607
FBgn0034396	-0.413257	2.09357	3.62908	0.0931092	0.594607
FBgn0026666	-0.214743	4.07031	3.62847	0.0931323	0.594607
FBgn0051156	-0.248239	3.37885	3.62061	0.093429	0.594607
FBgn0026084	-0.315315	6.38488	3.61673	0.0935761	0.594607
FBgn0262109	-0.284414	8.87099	3.61198	0.0937568	0.594607
FBgn0032946	-0.315113	6.35028	3.61176	0.0937651	0.594607
FBgn0031945	-0.190952	2.79631	3.61099	0.0937943	0.594607
FBgn0030617	-2.15723	5.93348	3.71324	0.0938987	0.594607
FBgn0038246	-0.418992	0.616441	3.60807	0.0939054	0.594607
FBgn0035524	0.2629	5.11028	3.60674	0.0939562	0.594607
FBgn0040324	-0.187026	5.96266	3.60663	0.0939606	0.594607
FBgn0039627	0.342849	4.01266	3.60639	0.0939695	0.594607
FBgn0023388	-0.241416	5.48305	3.60426	0.0940511	0.594607
FBgn0001978	0.140657	5.99877	3.60291	0.0941024	0.594607
FBgn0259149	-2.03509	2.63743	3.69775	0.0944635	0.594607
FBgn0033968	-0.267073	6.96843	3.59322	0.094474	0.594607
FBgn0014028	0.125346	7.73911	3.59275	0.0944919	0.594607
FBgn0085737	-1.90608	3.28673	3.69458	0.0945798	0.594607
FBgn0039324	-0.480919	3.80464	3.58833	0.0946619	0.594607
FBgn0262476	-0.249087	3.01871	3.58798	0.0946753	0.594607
FBgn0034540	0.257227	4.04066	3.58616	0.0947457	0.594607
FBgn0032451	0.284742	4.64781	3.58463	0.0948045	0.594607
FBgn0053970	-1.33865	6.14562	3.68836	0.0948083	0.594607
FBgn0031141	0.361436	6.97103	3.58398	0.0948296	0.594607
FBgn0259226	-0.838236	3.85627	3.63939	0.0950283	0.594607
FBgn0051871	-1.77107	4.73627	3.68133	0.0950672	0.594607
FBgn0030797	0.354891	3.10273	3.57713	0.0950944	0.594607
FBgn0032381	-0.92702	1.3141	3.58153	0.0951378	0.594607
FBgn0053196	0.393244	10.1076	3.57584	0.0951445	0.594607
FBgn0052082	-0.481815	5.86954	3.57855	0.095199	0.594607
FBgn0085411	-1.21459	1.031	3.59992	0.0952569	0.594607
FBgn0033766	0.191101	5.40302	3.57104	0.095331	0.594607
FBgn0263507	0.382922	3.29147	3.57098	0.0953334	0.594607
FBgn0051815	0.657368	1.39157	3.57023	0.0953624	0.594607
FBgn0035926	0.479872	10.4748	3.58619	0.0954056	0.594607
FBgn0035610	-0.454866	2.34595	3.56683	0.0954946	0.594607
FBgn0040305	0.159716	4.9293	3.56569	0.0955391	0.594607
FBgn0051522	-0.885242	6.97054	3.63731	0.0956326	0.594607
FBgn0261119	0.156467	5.0184	3.56192	0.0956862	0.594607
FBgn0040389	0.192622	5.13207	3.55973	0.0957718	0.594607
FBgn0085465	0.632393	1.45405	3.55896	0.095802	0.594607
FBgn0038640	-0.194839	2.69897	3.55875	0.0958101	0.594607
FBgn0052676	0.173074	5.80278	3.55617	0.0959111	0.594607
FBgn0035644	0.211971	2.58548	3.55599	0.0959181	0.594607
FBgn0033645	-2.27594	1.97812	3.65766	0.0959468	0.594607
FBgn0039239	1.11146	6.19718	3.65424	0.0959732	0.594607
FBgn0038830	-0.18069	4.98401	3.5522	0.096067	0.594607
FBgn0004878	-0.385867	0.493026	3.55203	0.0960735	0.594607
FBgn0035711	0.526729	3.48164	3.5503	0.0961415	0.594607
FBgn0030688	0.359108	7.29848	3.5498	0.0961613	0.594607
FBgn0036726	0.26328	7.19352	3.54785	0.096238	0.594607
FBgn0004828	0.210131	9.25346	3.54414	0.0963841	0.594607
FBgn0029647	-2.47557	1.41956	3.64508	0.0964184	0.594607
FBgn0037262	-0.213092	3.34005	3.54184	0.0964747	0.594607
FBgn0037427	-2.75332	4.25828	3.64146	0.0965548	0.594607
FBgn0039188	-0.220088	3.54134	3.53745	0.0966483	0.594607
FBgn0033887	-2.47078	1.88286	3.63893	0.0966503	0.594607
FBgn0010235	-0.240909	6.4644	3.53558	0.0967224	0.594607
FBgn0014396	-0.531285	0.175352	3.53364	0.0967993	0.594607
FBgn0030052	0.263509	5.60389	3.53336	0.0968101	0.594607
FBgn0002577	-2.92318	3.33789	3.63428	0.0968258	0.594607
FBgn0001112	-1.04677	4.97135	3.62136	0.0969748	0.594607
FBgn0264305	-0.165011	4.07696	3.52875	0.0969931	0.594607
FBgn0013984	0.427773	5.46396	3.52784	0.0970296	0.594607
FBgn0031252	0.231762	2.10722	3.52454	0.0971607	0.594607
FBgn0052296	0.363072	5.27673	3.52298	0.0972231	0.594607
FBgn0024179	-0.201095	4.25547	3.52273	0.0972332	0.594607
FBgn0016715	0.515814	5.19584	3.53459	0.0972718	0.594607
FBgn0265597	-0.358561	2.65584	3.5199	0.0973458	0.594607
FBgn0036964	-0.233354	4.1167	3.51811	0.0974173	0.594607
FBgn0030853	0.12797	7.65469	3.51701	0.0974614	0.594607
FBgn0010288	-0.151484	5.44607	3.5168	0.0974698	0.594607
FBgn0085803	1.93424	3.48565	3.61429	0.0975861	0.594607
FBgn0020621	-0.172071	6.67663	3.51204	0.0976607	0.594607
FBgn0037716	-0.25678	2.71137	3.51033	0.0977291	0.594607
FBgn0264437	0.666523	2.94261	3.52251	0.0977525	0.594607
FBgn0262867	-1.76417	6.08528	3.60835	0.0978136	0.594607
FBgn0040360	-1.76342	1.61889	3.59418	0.0978331	0.594607
FBgn0022770	0.31677	6.88076	3.50717	0.097856	0.594607
FBgn0039874	-0.259022	4.5493	3.50558	0.09792	0.594607
FBgn0264794	-0.311145	2.23012	3.50554	0.0979218	0.594607
FBgn0052241	1.63141	4.53261	3.60327	0.0980084	0.594607
FBgn0032857	0.401747	3.40506	3.50308	0.0980207	0.594607
FBgn0261341	-0.411076	10.3839	3.50103	0.0981033	0.594607
FBgn0036237	0.187428	6.3212	3.50087	0.0981098	0.594607
FBgn0030504	0.216239	6.63791	3.50054	0.0981232	0.594607
FBgn0001078	-1.46583	6.58594	3.59989	0.0981387	0.594607
FBgn0001253	-2.57504	5.81829	3.59949	0.098154	0.594607
FBgn0250755	-0.468735	1.5016	3.49945	0.0981673	0.594607
FBgn0034783	-0.284138	4.16057	3.49917	0.0981786	0.594607
FBgn0031178	1.13168	1.2487	3.52497	0.0981897	0.594607
FBgn0020767	-0.297626	5.39608	3.49847	0.0982068	0.594607
FBgn0050159	0.129215	5.61871	3.49736	0.0982517	0.594607
FBgn0034887	-2.0178	3.76443	3.59594	0.0982911	0.594607
FBgn0042174	-0.213868	7.44489	3.49511	0.0983426	0.594607
FBgn0050008	-0.899681	1.48955	3.50098	0.0984061	0.594607
FBgn0038147	-0.244086	6.40254	3.49207	0.0984657	0.594607
FBgn0002772	0.316518	11.7891	3.49139	0.0984935	0.594607
FBgn0003654	-0.217987	4.591	3.48953	0.0985689	0.594607
FBgn0035546	1.64872	4.22085	3.58652	0.0986551	0.594607
FBgn0038194	0.547446	6.28024	3.50346	0.0986698	0.594607
FBgn0001125	0.280792	8.60446	3.48662	0.098687	0.594607
FBgn0030466	0.249395	3.75683	3.48464	0.0987674	0.594607
FBgn0034009	-0.182091	4.39874	3.48257	0.098852	0.594607
FBgn0260460	0.201816	5.21801	3.48069	0.0989285	0.594607
FBgn0004427	0.272587	11.4284	3.47974	0.0989672	0.594607
FBgn0039620	-0.446416	6.26723	3.47846	0.0990196	0.594607
FBgn0020655	-0.20079	6.47265	3.47811	0.0990337	0.594607
FBgn0038492	-3.11903	4.50183	3.57573	0.0990748	0.594607
FBgn0037234	-0.226588	4.14394	3.47616	0.0991133	0.594607
FBgn0030429	1.08917	0.595288	3.47896	0.0991435	0.594607
FBgn0031265	0.123235	5.33978	3.47375	0.0992121	0.594607
FBgn0086027	0.895089	1.41212	3.47707	0.0992913	0.594607
FBgn0262515	0.159068	9.25611	3.46196	0.0996962	0.594607
FBgn0031738	-0.302226	6.05754	3.4598	0.0997851	0.594607
FBgn0030976	0.186614	5.57833	3.45949	0.0997982	0.594607
FBgn0034293	0.491761	2.25812	3.45211	0.100103	0.594607
FBgn0265988	0.208092	4.97095	3.45191	0.100112	0.594607
FBgn0039686	-0.97369	1.35198	3.46594	0.100113	0.594607
FBgn0039531	-0.181357	2.87944	3.45095	0.100151	0.594607
FBgn0011225	-0.217896	7.50635	3.45089	0.100154	0.594607
FBgn0038132	-2.50602	5.41761	3.54462	0.100298	0.594607
FBgn0039406	0.170611	7.08757	3.44473	0.10041	0.594607
FBgn0038073	-1.56723	2.872	3.53733	0.100587	0.594607
FBgn0028703	-0.171517	5.05229	3.43995	0.100609	0.594607
FBgn0011706	0.410082	0.351865	3.43916	0.100641	0.594607
FBgn0038610	-1.00955	7.90083	3.52232	0.100699	0.594607
FBgn0038980	-0.297862	2.30628	3.43383	0.100864	0.594607
FBgn0028671	-0.2587	6.37035	3.43315	0.100892	0.594607
FBgn0004197	-0.515088	4.50343	3.44421	0.100899	0.594607
FBgn0031016	0.33064	3.56207	3.43208	0.100937	0.594607
FBgn0083015	0.613717	4.38688	3.46018	0.100942	0.594607
FBgn0265052	0.238344	4.33565	3.43072	0.100994	0.594607
FBgn0013680	1.33656	4.63602	3.52681	0.101007	0.594607
FBgn0039417	0.316265	4.19978	3.43008	0.101021	0.594607
FBgn0027554	-0.268433	5.19801	3.4249	0.101238	0.594607
FBgn0052726	0.654622	0.871961	3.42474	0.101245	0.594607
FBgn0000181	0.159461	9.62674	3.42412	0.101271	0.594607
FBgn0061476	-0.365764	1.22087	3.42331	0.101305	0.594607
FBgn0004435	-0.242165	4.84615	3.42116	0.101396	0.594607
FBgn0020309	0.263013	6.44885	3.42072	0.101414	0.594607
FBgn0083975	-0.439857	1.79582	3.41957	0.101463	0.594607
FBgn0031772	0.308772	3.77692	3.41533	0.101642	0.594607
FBgn0086698	-0.357979	2.57371	3.41457	0.101674	0.594607
FBgn0025800	0.176214	6.81204	3.41376	0.101708	0.594607
FBgn0035151	-0.375901	1.28087	3.41363	0.101714	0.594607
FBgn0261608	0.218215	9.75012	3.40934	0.101895	0.594607
FBgn0031426	-1.45452	3.64469	3.50474	0.101895	0.594607
FBgn0031908	0.161465	9.54272	3.40893	0.101912	0.594607
FBgn0038431	0.170515	3.27639	3.40816	0.101945	0.594607
FBgn0038313	0.244856	3.57356	3.40795	0.101954	0.594607
FBgn0262731	-0.297317	4.16275	3.40669	0.102007	0.594607
FBgn0031873	-0.210076	2.72393	3.40661	0.102011	0.594607
FBgn0036732	-0.508697	5.80889	3.41304	0.102252	0.594607
FBgn0026415	0.15273	9.29374	3.40063	0.102265	0.594607
FBgn0250753	-0.148982	9.44362	3.39646	0.102443	0.594607
FBgn0033728	0.637264	3.11748	3.40758	0.102563	0.594607
FBgn0083951	-1.47071	3.06001	3.48831	0.102563	0.594607
FBgn0010282	-0.146494	5.41825	3.39206	0.102631	0.594607
FBgn0043796	-0.218256	2.37321	3.392	0.102634	0.594607
FBgn0003943	0.335022	8.39903	3.39081	0.102684	0.594607
FBgn0004638	-0.13141	6.40863	3.39021	0.10271	0.594607
FBgn0035947	-0.222829	6.96884	3.38876	0.102772	0.594607
FBgn0026206	0.295871	5.84324	3.38862	0.102778	0.594607
FBgn0013679	-0.775884	9.10319	3.45421	0.102844	0.594607
FBgn0038282	-0.463981	2.88505	3.38519	0.102925	0.594607
FBgn0000473	0.795856	3.87489	3.43707	0.102968	0.594607
FBgn0034380	-0.237517	3.55515	3.3837	0.102989	0.594607
FBgn0033873	-1.52615	5.12745	3.47773	0.102997	0.594607
FBgn0261549	0.270059	4.49737	3.38295	0.103022	0.594607
FBgn0034579	0.227854	5.32504	3.37792	0.103238	0.594607
FBgn0033607	-0.131958	4.3294	3.37757	0.103253	0.594607
FBgn0036320	0.313588	4.2276	3.37672	0.10329	0.594607
FBgn0013263	-0.295986	4.16728	3.37423	0.103397	0.594607
FBgn0036461	-0.203055	4.94995	3.37255	0.10347	0.594607
FBgn0036774	0.244308	5.70027	3.37098	0.103538	0.594607
FBgn0000063	-0.404852	0.334612	3.37077	0.103547	0.594607
FBgn0034565	-2.03975	1.70462	3.46423	0.103553	0.594607
FBgn0052791	0.28196	1.68753	3.36974	0.103592	0.594607
FBgn0051191	-0.603608	0.578899	3.36718	0.103702	0.594607
FBgn0028430	0.252028	3.40341	3.3665	0.103732	0.594607
FBgn0039584	-0.425735	1.6419	3.36591	0.103758	0.594607
FBgn0036317	-0.231569	4.07663	3.36582	0.103762	0.594607
FBgn0265187	-1.06564	5.66516	3.45708	0.103791	0.594607
FBgn0035084	-0.418289	1.51768	3.36472	0.103809	0.594607
FBgn0030891	0.202756	3.80484	3.36414	0.103834	0.594607
FBgn0001092	0.15129	11.375	3.362	0.103928	0.594607
FBgn0038196	0.197395	6.07034	3.36022	0.104005	0.594607
FBgn0052278	-0.154567	4.91165	3.35869	0.104072	0.594607
FBgn0020389	-0.680898	5.76788	3.40371	0.104092	0.594607
FBgn0030114	0.156014	2.77481	3.35745	0.104126	0.594607
FBgn0085317	0.363507	5.17	3.35471	0.104245	0.594607
FBgn0030809	0.301353	6.64175	3.35254	0.10434	0.594607
FBgn0083036	0.52344	0.240011	3.35168	0.104378	0.594607
FBgn0028523	-0.289702	3.26845	3.35098	0.104408	0.594607
FBgn0085799	-2.00593	6.79399	3.44274	0.104446	0.594607
FBgn0029914	0.192944	3.3853	3.34993	0.104454	0.594607
FBgn0034243	0.165684	6.36061	3.3488	0.104504	0.594607
FBgn0010215	-0.144578	6.80285	3.34791	0.104542	0.594607
FBgn0030930	-0.227228	5.13801	3.34785	0.104545	0.594607
FBgn0083010	0.661161	4.94805	3.38543	0.104659	0.594607
FBgn0039415	-1.27579	3.13976	3.4308	0.10473	0.594607
FBgn0033085	0.192034	4.10328	3.34171	0.104815	0.594607
FBgn0001168	0.384731	5.47611	3.34063	0.104862	0.594607
FBgn0086710	0.216609	9.9576	3.33942	0.104916	0.594607
FBgn0015277	0.214489	3.54022	3.33915	0.104927	0.594607
FBgn0024836	0.268209	4.97114	3.33902	0.104933	0.594607
FBgn0085260	-0.293475	1.88934	3.33291	0.105203	0.594607
FBgn0050158	-0.39559	1.04567	3.33215	0.105236	0.594607
FBgn0000115	-0.134446	5.81985	3.3321	0.105239	0.594607
FBgn0262733	-0.191705	4.07762	3.3301	0.105327	0.594607
FBgn0039040	-0.797594	0.317873	3.3298	0.10534	0.594607
FBgn0053519	0.142142	9.74459	3.32762	0.105437	0.594607
FBgn0086601	0.686755	1.43456	3.32725	0.105453	0.594607
FBgn0040786	0.273254	2.0227	3.32673	0.105476	0.594607
FBgn0028577	-0.294729	5.52315	3.324	0.105598	0.594607
FBgn0032690	-0.231435	4.4482	3.32332	0.105628	0.594607
FBgn0029148	0.352736	6.05799	3.32271	0.105655	0.594607
FBgn0250839	-2.42309	4.62797	3.41044	0.105809	0.594607
FBgn0053169	-0.196614	4.95241	3.31865	0.105835	0.594607
FBgn0033574	0.538439	2.64956	3.31852	0.105841	0.594607
FBgn0036882	-0.278136	2.45051	3.3175	0.105887	0.594607
FBgn0037697	0.449303	5.34443	3.3156	0.105971	0.594607
FBgn0260753	0.394027	2.02359	3.3145	0.10602	0.594607
FBgn0036985	-1.6448	6.35455	3.4049	0.106045	0.594607
FBgn0031517	-0.458994	2.49387	3.31334	0.106072	0.594607
FBgn0039238	0.317699	3.15838	3.31309	0.106083	0.594607
FBgn0032231	0.207062	3.54466	3.3129	0.106091	0.594607
FBgn0002775	-0.200996	2.29036	3.31076	0.106187	0.594607
FBgn0267690	-2.62624	1.61169	3.40025	0.106244	0.594607
FBgn0051769	0.319953	5.69686	3.30887	0.106272	0.594607
FBgn0004859	0.194775	5.93833	3.30706	0.106353	0.594607
FBgn0026056	-0.281722	3.6541	3.30418	0.106482	0.594607
FBgn0085428	-0.433051	4.09321	3.30388	0.106495	0.594607
FBgn0033785	-0.502953	3.60292	3.30178	0.10659	0.594607
FBgn0023458	0.201306	7.38472	3.2992	0.106706	0.594607
FBgn0029003	-0.136261	4.05861	3.29751	0.106782	0.594607
FBgn0082997	0.695299	0.803399	3.29606	0.106847	0.594607
FBgn0024841	0.490396	5.58345	3.30476	0.106953	0.594607
FBgn0003159	0.273313	5.8761	3.29159	0.107049	0.594607
FBgn0030847	-0.138868	4.30894	3.28931	0.107152	0.594607
FBgn0065076	0.971474	1.8569	3.31444	0.107185	0.594607
FBgn0032614	-0.327854	5.45224	3.28337	0.107422	0.594607
FBgn0001280	-0.157969	4.74101	3.28258	0.107457	0.594607
FBgn0262518	-0.238034	5.89589	3.28091	0.107533	0.594607
FBgn0032248	0.198252	3.85603	3.27982	0.107583	0.594607
FBgn0034045	0.455556	5.09224	3.28024	0.107622	0.594607
FBgn0260659	-0.151861	5.59632	3.27673	0.107724	0.594607
FBgn0022764	0.424556	6.36155	3.27642	0.107738	0.594607
FBgn0026079	0.152191	5.98424	3.2761	0.107752	0.594607
FBgn0265011	-2.5643	2.80814	3.3626	0.107871	0.594607
FBgn0037856	-0.250056	2.57729	3.27204	0.107937	0.594607
FBgn0044510	-0.239864	6.40255	3.26812	0.108117	0.594607
FBgn0003204	0.224553	6.56566	3.26719	0.10816	0.594607
FBgn0050373	0.231469	4.61094	3.2669	0.108173	0.594607
FBgn0044452	0.171638	5.88777	3.26683	0.108176	0.594607
FBgn0004191	0.721137	7.14735	3.31043	0.108284	0.594607
FBgn0037109	0.177521	4.54715	3.26432	0.108291	0.594607
FBgn0034662	0.179672	10.4276	3.262	0.108397	0.594607
FBgn0039594	-1.18493	7.20497	3.34678	0.108564	0.594607
FBgn0083013	0.991129	3.80178	3.33	0.108578	0.594607
FBgn0031866	-0.498497	2.09356	3.25765	0.108598	0.594607
FBgn0014023	0.127509	6.03243	3.25624	0.108663	0.594607
FBgn0010309	-0.226279	2.91679	3.25604	0.108672	0.594607
FBgn0267668	0.246838	2.1168	3.25422	0.108756	0.594607
FBgn0015396	0.203437	3.47315	3.25365	0.108782	0.594607
FBgn0032362	-2.33934	3.6089	3.34135	0.108804	0.594607
FBgn0036746	0.314698	4.28509	3.24774	0.109055	0.594607
FBgn0035144	0.653888	1.15104	3.24675	0.109101	0.594607
FBgn0038676	-3.00823	4.63843	3.33311	0.109168	0.594607
FBgn0036593	-2.24563	3.51035	3.33049	0.109285	0.594607
FBgn0031972	-0.219137	2.71397	3.24252	0.109298	0.594607
FBgn0035294	-0.20128	3.41335	3.24196	0.109324	0.594607
FBgn0259233	-2.44547	4.72838	3.32737	0.109423	0.594607
FBgn0001098	0.313796	9.9654	3.23896	0.109463	0.594607
FBgn0035807	-0.17736	4.63101	3.23878	0.109471	0.594607
FBgn0035154	0.162706	7.6176	3.23539	0.109629	0.594607
FBgn0032399	-1.51499	3.38808	3.32018	0.109744	0.594607
FBgn0033917	0.135199	6.21466	3.22984	0.109888	0.594607
FBgn0083047	0.838629	4.2271	3.29024	0.10996	0.594607
FBgn0003464	0.193497	3.67738	3.22783	0.109982	0.594607
FBgn0002948	-0.425414	0.565346	3.22737	0.110004	0.594607
FBgn0037482	-0.165134	4.15625	3.22715	0.110014	0.594607
FBgn0038074	0.755916	7.62219	3.27788	0.11002	0.594607
FBgn0262111	-1.86278	4.88442	3.31325	0.110054	0.594607
FBgn0012344	-0.453596	1.90671	3.22482	0.110123	0.594607
FBgn0040571	-0.468787	1.51332	3.22375	0.110174	0.594607
FBgn0015602	-0.143334	4.40747	3.22347	0.110187	0.594607
FBgn0003475	-0.257853	4.26821	3.22284	0.110216	0.594607
FBgn0263741	-3.0927	5.08975	3.30937	0.110228	0.594607
FBgn0034797	-0.867835	6.77007	3.2869	0.110267	0.594607
FBgn0262475	0.231575	5.01704	3.22148	0.11028	0.594607
FBgn0038488	-0.222386	4.48422	3.22052	0.110325	0.594607
FBgn0014391	0.349462	8.28396	3.21859	0.110416	0.594607
FBgn0035041	-0.547234	0.220087	3.21801	0.110443	0.594607
FBgn0015829	-0.17378	3.69095	3.21737	0.110474	0.594607
FBgn0003719	0.391858	0.882508	3.21595	0.11054	0.594607
FBgn0051324	-0.190462	4.12416	3.2144	0.110614	0.594607
FBgn0261014	-0.307774	9.0709	3.21334	0.110663	0.594607
FBgn0011224	0.251618	6.16277	3.21321	0.11067	0.594607
FBgn0037515	0.311716	4.80785	3.21119	0.110765	0.594607
FBgn0035677	-0.292751	1.17431	3.2102	0.110812	0.594607
FBgn0038140	-0.485176	0.425585	3.21013	0.110815	0.594607
FBgn0010435	-0.319597	6.65719	3.20535	0.111042	0.594607
FBgn0031681	-0.478336	6.13473	3.20983	0.111134	0.594607
FBgn0037466	-0.164977	3.82859	3.20314	0.111147	0.594607
FBgn0038306	0.319177	5.08477	3.20218	0.111192	0.594607
FBgn0033528	-0.147731	3.8222	3.20179	0.11121	0.594607
FBgn0030049	0.315702	5.255	3.19803	0.111389	0.594607
FBgn0037521	-0.450991	1.58593	3.19675	0.11145	0.594607
FBgn0039464	0.378665	6.68672	3.19605	0.111484	0.594607
FBgn0000477	0.189088	6.55116	3.19324	0.111618	0.594607
FBgn0034563	-1.70698	2.85532	3.2765	0.111718	0.594607
FBgn0016754	-0.619574	4.32491	3.21947	0.111772	0.594607
FBgn0044020	0.223433	3.05038	3.18896	0.111822	0.594607
FBgn0260866	0.280654	4.4385	3.18841	0.111848	0.594607
FBgn0263219	-0.363332	2.81881	3.18679	0.111926	0.594607
FBgn0035089	-0.825031	8.14494	3.24806	0.111942	0.594607
FBgn0032053	0.288084	5.47438	3.18468	0.112027	0.594607
FBgn0035612	0.943951	9.09307	3.26315	0.11207	0.594607
FBgn0037632	0.129251	7.94886	3.18214	0.112149	0.594607
FBgn0036614	-0.275273	3.72829	3.1815	0.11218	0.594607
FBgn0261989	0.563647	4.50179	3.20159	0.112207	0.594607
FBgn0027052	-0.186962	4.53587	3.17942	0.11228	0.594607
FBgn0263038	-2.51035	5.61899	3.26388	0.112297	0.594607
FBgn0033055	-0.150286	3.66986	3.17889	0.112305	0.594607
FBgn0085453	0.188931	3.18693	3.17663	0.112414	0.594607
FBgn0003896	-0.183738	2.93065	3.1759	0.112449	0.594607
FBgn0037298	0.15611	6.48159	3.17578	0.112455	0.594607
FBgn0260857	-0.189248	4.81941	3.17518	0.112484	0.594607
FBgn0039274	0.300893	4.21524	3.17421	0.112531	0.594607
FBgn0037470	-0.181477	5.22745	3.17336	0.112572	0.594607
FBgn0020378	0.373236	0.701587	3.17104	0.112684	0.594607
FBgn0035888	-0.507099	3.2212	3.16682	0.112888	0.594607
FBgn0034438	-0.208406	5.27587	3.16532	0.112961	0.594607
FBgn0262587	0.607857	4.1293	3.1912	0.112962	0.594607
FBgn0030798	-1.33105	3.5931	3.24947	0.112964	0.594607
FBgn0063485	-0.257308	3.08755	3.16381	0.113034	0.594607
FBgn0016977	0.516273	7.83464	3.1754	0.113081	0.594607
FBgn0086683	-0.165873	4.50524	3.16243	0.113101	0.594607
FBgn0038330	-0.39379	1.26488	3.16211	0.113117	0.594607
FBgn0034582	0.571432	8.24051	3.18569	0.113147	0.594607
FBgn0036553	0.220075	5.63231	3.16083	0.113179	0.594607
FBgn0035039	-0.678762	5.23482	3.20317	0.11318	0.594607
FBgn0032889	0.227956	8.65918	3.16079	0.113181	0.594607
FBgn0034567	-0.516725	0.295907	3.15958	0.11324	0.594607
FBgn0038826	0.569823	7.33144	3.17887	0.113316	0.594607
FBgn0028920	0.378073	8.63883	3.15659	0.113385	0.594607
FBgn0259192	-1.9368	3.9085	3.24028	0.113391	0.594607
FBgn0034551	-3.23201	4.56492	3.24009	0.1134	0.594607
FBgn0037424	-2.63382	7.55381	3.23955	0.113425	0.594607
FBgn0030107	-3.02359	2.94207	3.23728	0.113531	0.594607
FBgn0016061	-0.483779	2.86035	3.1524	0.113589	0.594607
FBgn0031770	-0.616956	0.543129	3.15221	0.113599	0.594607
FBgn0086372	-0.144173	5.72705	3.14818	0.113796	0.594607
FBgn0035254	-0.218412	1.75742	3.14809	0.1138	0.594607
FBgn0004387	0.199673	5.04622	3.148	0.113805	0.594607
FBgn0033481	-2.51573	4.33406	3.23075	0.113837	0.594607
FBgn0010223	0.293831	4.41359	3.14517	0.113943	0.594607
FBgn0033401	-0.132075	4.37795	3.14087	0.114155	0.594607
FBgn0038405	-1.34174	6.33533	3.22344	0.11418	0.594607
FBgn0032987	0.162645	10.6494	3.13864	0.114264	0.594607
FBgn0010747	-0.222303	7.37697	3.13761	0.114315	0.594607
FBgn0033088	-0.251289	2.81195	3.13732	0.114329	0.594607
FBgn0261503	-0.556501	2.39253	3.13723	0.114334	0.594607
FBgn0024329	0.112419	5.68397	3.13682	0.114354	0.594607
FBgn0029689	0.264884	3.13804	3.13544	0.114422	0.594607
FBgn0030720	0.259921	5.09051	3.13515	0.114436	0.594607
FBgn0266636	-0.48872	0.0880507	3.13115	0.114633	0.594607
FBgn0036922	-0.375832	1.30957	3.12843	0.114768	0.594607
FBgn0086662	0.93071	1.84787	3.14942	0.114798	0.594607
FBgn0031464	-0.604481	5.52949	3.15964	0.11481	0.594607
FBgn0038070	-1.07235	2.48485	3.17419	0.114996	0.594607
FBgn0000416	0.139147	8.6025	3.12364	0.115006	0.594607
FBgn0250791	-0.176465	6.48327	3.12121	0.115126	0.594607
FBgn0036825	0.109885	9.88978	3.12055	0.115159	0.594607
FBgn0036395	-0.474139	0.103403	3.11896	0.115238	0.594607
FBgn0032513	0.213879	6.1058	3.1177	0.115301	0.594607
FBgn0036926	-0.239551	3.63048	3.11647	0.115362	0.594607
FBgn0053460	0.335918	1.9271	3.1159	0.115391	0.594607
FBgn0025388	-0.266272	1.79744	3.11575	0.115398	0.594607
FBgn0051778	0.270449	3.17882	3.11496	0.115438	0.594607
FBgn0038339	-2.799	5.41983	3.19453	0.115552	0.594607
FBgn0025640	0.363281	5.18552	3.11008	0.115681	0.594607
FBgn0053983	0.540362	3.61912	3.11835	0.115789	0.594607
FBgn0023522	0.361254	3.96302	3.10765	0.115803	0.594607
FBgn0034360	0.368049	1.5952	3.10406	0.115983	0.594607
FBgn0085450	0.239363	5.50579	3.10103	0.116135	0.594607
FBgn0000075	-2.12517	5.61552	3.17796	0.116349	0.594607
FBgn0032234	-0.177413	3.54932	3.09523	0.116427	0.594607
FBgn0030796	-0.584505	5.18621	3.1218	0.116429	0.594607
FBgn0265998	0.175918	6.8327	3.0946	0.116459	0.594607
FBgn0039056	-0.284596	4.94828	3.09394	0.116492	0.594607
FBgn0261592	0.0960171	10.6283	3.09361	0.116509	0.594607
FBgn0036289	-1.91991	6.56381	3.1741	0.116535	0.594607
FBgn0031629	0.383561	9.88658	3.09266	0.116557	0.594607
FBgn0032895	0.231808	2.18684	3.09257	0.116561	0.594607
FBgn0038958	-2.58585	2.01307	3.17349	0.116564	0.594607
FBgn0031769	-0.171775	4.56958	3.08928	0.116728	0.594607
FBgn0038360	-0.214357	5.10048	3.08627	0.11688	0.594607
FBgn0264816	-0.337112	2.76757	3.08455	0.116968	0.594607
FBgn0011656	0.217951	6.24194	3.08305	0.117044	0.594607
FBgn0037467	-0.234114	6.1636	3.08191	0.117102	0.594607
FBgn0264711	-0.677229	2.32375	3.08192	0.117264	0.594607
FBgn0042105	0.346527	4.47041	3.07724	0.117339	0.594607
FBgn0262512	0.317875	7.68563	3.0766	0.117372	0.594607
FBgn0031360	0.266449	6.04661	3.07438	0.117485	0.594607
FBgn0030081	0.229436	3.49391	3.07407	0.117501	0.594607
FBgn0004910	-0.118447	6.07624	3.07353	0.117529	0.594607
FBgn0262291	0.921792	1.49349	3.08528	0.117607	0.594607
FBgn0038470	-0.305431	2.82335	3.07193	0.11761	0.594607
FBgn0039407	0.344226	2.3209	3.07145	0.117635	0.594607
FBgn0032444	0.182414	8.04165	3.07007	0.117705	0.594607
FBgn0260635	0.277176	7.04353	3.06691	0.117867	0.594607
FBgn0262889	-2.21317	2.18952	3.14604	0.117903	0.594607
FBgn0034728	-0.254247	3.09645	3.06487	0.117972	0.594607
FBgn0263911	0.318456	8.30905	3.06368	0.118033	0.594607
FBgn0265003	0.166843	5.29105	3.06362	0.118036	0.594607
FBgn0030096	0.157449	4.95966	3.06328	0.118053	0.594607
FBgn0035044	0.228825	5.61361	3.06105	0.118168	0.594607
FBgn0003274	0.119892	10.7082	3.05995	0.118225	0.594607
FBgn0052645	-1.79187	5.72625	3.13709	0.118344	0.594607
FBgn0039264	-2.69751	4.55236	3.13505	0.118445	0.594607
FBgn0031378	-0.608508	2.45256	3.05515	0.118472	0.594607
FBgn0261793	0.384187	6.37925	3.05464	0.118498	0.594607
FBgn0033605	-0.170773	3.32627	3.05413	0.118525	0.594607
FBgn0030775	0.283675	7.36986	3.05203	0.118633	0.594607
FBgn0033636	0.337543	5.53992	3.05044	0.118715	0.594607
FBgn0034210	-0.216119	3.68425	3.04992	0.118742	0.594607
FBgn0036515	0.235031	6.49406	3.04797	0.118843	0.594607
FBgn0035533	-0.262194	5.32114	3.04778	0.118853	0.594607
FBgn0032485	-0.121087	4.44421	3.04658	0.118915	0.594607
FBgn0033052	0.238097	5.26887	3.04638	0.118926	0.594607
FBgn0263289	0.178458	7.04001	3.04633	0.118928	0.594607
FBgn0003165	0.292351	5.83951	3.04546	0.118973	0.594607
FBgn0039689	0.138397	4.74727	3.04502	0.118996	0.594607
FBgn0035318	-0.21254	3.52454	3.04433	0.119032	0.594607
FBgn0032997	-0.187484	5.57094	3.04421	0.119038	0.594607
FBgn0266414	0.781808	2.3098	3.05933	0.119043	0.594607
FBgn0038744	-0.178002	4.58155	3.04269	0.119117	0.594607
FBgn0032157	-0.117615	4.9924	3.04261	0.119121	0.594607
FBgn0015756	0.180658	10.4822	3.04173	0.119167	0.594607
FBgn0046879	-0.288928	1.22507	3.03944	0.119287	0.594607
FBgn0029913	0.310814	1.85541	3.03911	0.119304	0.594607
FBgn0262114	-0.192321	5.36185	3.03443	0.119548	0.594607
FBgn0023097	-0.184203	5.20765	3.03342	0.1196	0.594607
FBgn0051076	-0.289168	2.93329	3.03336	0.119603	0.594607
FBgn0262717	-0.813732	7.85609	3.0893	0.119644	0.594607
FBgn0035679	0.280772	5.03373	3.03182	0.119684	0.594607
FBgn0001085	0.181014	3.67586	3.03153	0.119699	0.594607
FBgn0264822	0.733776	1.16669	3.03143	0.119704	0.594607
FBgn0039509	0.29485	3.75111	3.03023	0.119767	0.594607
FBgn0265185	0.155559	7.22481	3.03014	0.119772	0.594607
FBgn0015245	0.134845	10.1275	3.02984	0.119788	0.594607
FBgn0036372	-0.419122	5.60995	3.02935	0.119813	0.594607
FBgn0030459	-2.5829	3.28357	3.10688	0.119848	0.594607
FBgn0259108	0.341149	5.90953	3.02699	0.119937	0.594607
FBgn0031161	0.369101	4.15105	3.0262	0.119979	0.594607
FBgn0032620	0.164524	4.7835	3.02482	0.120051	0.594607
FBgn0033252	-2.06071	5.21398	3.10264	0.120062	0.594607
FBgn0263237	0.176963	3.29791	3.02251	0.120172	0.594607
FBgn0040372	0.248262	4.89224	3.02199	0.120199	0.594607
FBgn0004009	-0.271601	3.01346	3.02138	0.120232	0.594607
FBgn0016726	0.220375	10.0269	3.01952	0.12033	0.594607
FBgn0035743	0.614758	8.1382	3.04996	0.120404	0.594607
FBgn0031689	0.494971	5.65986	3.03009	0.120452	0.594607
FBgn0011708	-0.185772	6.01936	3.01708	0.120458	0.594607
FBgn0013973	-0.353919	1.85926	3.01707	0.120459	0.594607
FBgn0032002	0.326214	5.34074	3.01485	0.120576	0.594607
FBgn0003942	0.120236	11.1479	3.01388	0.120627	0.594607
FBgn0032821	-0.453801	5.34089	3.01688	0.12072	0.594607
FBgn0259722	0.183353	5.05128	3.01055	0.120803	0.594607
FBgn0263461	1.81617	2.85326	3.0849	0.120959	0.594607
FBgn0039559	-0.144944	4.91971	3.00744	0.120968	0.594607
FBgn0032197	-0.126502	5.08226	3.00515	0.121089	0.594607
FBgn0028421	0.178586	4.0424	3.00454	0.121122	0.594607
FBgn0000533	0.157394	4.6895	3.00295	0.121206	0.594607
FBgn0050069	0.353112	8.21232	3.00252	0.121229	0.594607
FBgn0050414	0.43872	3.50353	3.00228	0.121242	0.594607
FBgn0032876	-0.229397	4.21105	3.00172	0.121272	0.594607
FBgn0028515	0.120002	5.67084	3.00104	0.121308	0.594607
FBgn0262972	0.615552	6.80917	3.03147	0.121323	0.594607
FBgn0037270	0.164084	7.24349	3.00055	0.121334	0.594607
FBgn0023519	0.153145	5.13253	2.99978	0.121375	0.594607
FBgn0037395	-2.18478	3.77518	3.07669	0.121378	0.594607
FBgn0036107	0.226715	3.7001	2.9994	0.121395	0.594607
[truncated: 7,993 more rows]

## Sheet: All genes S–W– vs S–Lh T1
Differential expression analysis: Result of edgeR corresponding to the S–W– vs. S–Lh comparision at T1 (24 hours post wasp attack). log2FC is reported
Gene_id	logFC	logCPM	F	PValue	FDR
FBgn0029167	-0.969946	8.20866	118.618	4.73422e-06	0.0407353
FBgn0261560	1.44681	5.83748	102.821	8.0688e-06	0.0407353
FBgn0013672	-2.25908	10.0134	90.7996	1.35758e-05	0.0456917
FBgn0020294	0.655909	5.17847	79.8114	2.05051e-05	0.0517601
FBgn0014033	-1.14874	4.16017	68.665	3.53673e-05	0.0714043
FBgn0029147	-1.1673	3.36496	65.2701	4.2431e-05	0.0714043
FBgn0034880	-2.20529	2.29002	61.1914	5.34269e-05	0.0770645
FBgn0039108	0.933084	4.25944	55.0865	7.75062e-05	0.0916722
FBgn0264343	-1.81952	2.20339	53.6699	8.49377e-05	0.0916722
FBgn0002869	-0.782958	5.51148	52.6591	9.07915e-05	0.0916722
FBgn0036264	1.7537	4.91727	48.9947	0.000118738	0.106968
FBgn0032010	0.463035	5.78539	47.8056	0.000127128	0.106968
FBgn0261362	1.09274	7.83248	44.2895	0.000165382	0.109201
FBgn0261803	0.865328	5.2033	43.0456	0.000182302	0.109201
FBgn0038894	1.26653	3.26499	42.9588	0.000183563	0.109201
FBgn0031033	2.20486	0.948044	42.5933	0.000188989	0.109201
FBgn0040104	-0.9404	3.98224	42.1629	0.00019564	0.109201
FBgn0035623	-1.221	1.52374	40.1893	0.000230179	0.109201
FBgn0038943	1.54259	2.87441	40.1417	0.000231102	0.109201
FBgn0038100	0.668686	5.62306	39.6415	0.000241095	0.109201
FBgn0260768	-1.49412	1.28562	39.5965	0.000242021	0.109201
FBgn0002576	1.58026	0.895472	39.4572	0.000244913	0.109201
FBgn0039801	-0.587687	3.75169	39.2756	0.00024875	0.109201
FBgn0038680	0.840305	4.07192	38.0223	0.000277385	0.116698
FBgn0264437	-3.96456	1.69047	37.7912	0.000325635	0.122806
FBgn0082973	1.20044	2.30884	36.1613	0.000327979	0.122806
FBgn0033756	-1.41296	0.135073	35.4361	0.000350797	0.122806
FBgn0025643	0.743381	7.92535	35.0861	0.000362521	0.122806
FBgn0034394	0.649036	6.1002	34.6936	0.000376257	0.122806
FBgn0004512	0.497768	6.27315	34.5854	0.000380156	0.122806
FBgn0003137	-0.534302	9.35749	33.6833	0.000414738	0.122806
FBgn0053012	-0.547256	5.51759	33.4858	0.000422829	0.122806
FBgn0002733	0.659047	2.81587	33.1211	0.000438293	0.122806
FBgn0001291	0.524607	5.18892	32.6846	0.000457747	0.122806
FBgn0031261	-1.02899	2.54502	32.657	0.000459014	0.122806
FBgn0262993	1.0873	0.891395	32.3528	0.000473264	0.122806
FBgn0004368	0.359888	5.60101	32.1941	0.00048092	0.122806
FBgn0030537	1.87349	5.96285	33.3016	0.000489937	0.122806
FBgn0039804	1.13024	3.76796	31.9828	0.000491352	0.122806
FBgn0263235	0.964338	5.40214	31.8614	0.000497476	0.122806
FBgn0038053	1.48251	4.14264	31.9567	0.000502717	0.122806
FBgn0263046	0.83753	3.02867	31.5939	0.000511306	0.122806
FBgn0034126	-1.00267	1.36722	31.3749	0.000522993	0.122806
FBgn0046687	0.537131	2.66976	30.9339	0.000547554	0.125651
FBgn0000565	1.50059	6.67508	30.814	0.000581264	0.130423
FBgn0039178	1.32057	3.60432	29.8907	0.000611678	0.134263
FBgn0031432	0.625929	4.99035	29.6658	0.000626714	0.134637
FBgn0034221	-1.21298	1.52024	29.4562	0.000641147	0.134868
FBgn0031988	0.382642	5.8222	29.1424	0.000663541	0.135704
FBgn0029824	0.616712	2.74554	29.0273	0.000672	0.135704
FBgn0243514	-1.15778	2.54481	28.3314	0.000726141	0.143762
FBgn0035076	-0.49058	4.66525	28.1346	0.000742432	0.14416
FBgn0053192	-1.55801	6.57756	28.6114	0.000763383	0.145432
FBgn0005660	1.15176	0.331964	27.5423	0.000794307	0.148521
FBgn0003209	0.445599	5.85914	27.2775	0.000818967	0.150347
FBgn0032387	-0.853142	2.31323	26.3916	0.000908765	0.162119
FBgn0262146	-1.78572	6.26278	27.3425	0.000915203	0.162119
FBgn0033724	-0.602807	3.83447	25.869	0.00096756	0.168439
FBgn0004430	1.01631	9.44472	25.6117	0.000998258	0.170837
FBgn0034582	0.929272	8.48275	25.2813	0.00103949	0.174929
FBgn0033367	1.09499	8.22741	24.6779	0.00112046	0.178104
FBgn0083048	1.01462	4.0344	24.6697	0.00112161	0.178104
FBgn0040089	-0.36181	3.97575	24.6495	0.00112446	0.178104
FBgn0033926	0.285305	9.17942	24.6093	0.00113016	0.178104
FBgn0082954	1.06738	1.37878	24.495	0.00114656	0.178104
FBgn0053983	1.09725	3.99275	24.3455	0.00116844	0.178754
FBgn0264815	0.466465	5.04216	24.0537	0.00121271	0.182758
FBgn0033476	0.43018	7.00832	23.8398	0.00124651	0.182921
FBgn0011202	0.328157	5.89586	23.7519	0.00126073	0.182921
FBgn0052107	1.46517	2.50419	23.5016	0.00130238	0.182921
FBgn0030334	-0.711361	3.67205	23.3692	0.0013251	0.182921
FBgn0035877	0.627707	4.28041	23.3209	0.00133351	0.182921
FBgn0262203	1.23079	0.604874	23.2088	0.0013533	0.182921
FBgn0034909	0.772006	4.97699	23.0949	0.00137379	0.182921
FBgn0039069	0.984864	6.25576	23.079	0.00137668	0.182921
FBgn0037906	0.760396	5.0623	23.0229	0.00138694	0.182921
FBgn0026404	0.496543	4.37218	22.8903	0.00141157	0.182921
FBgn0264494	0.614893	5.97719	22.6578	0.00145611	0.182921
FBgn0028430	-0.617019	3.01633	22.6507	0.00145749	0.182921
FBgn0083041	1.0395	3.34948	22.6064	0.00146619	0.182921
FBgn0036667	-0.329978	5.39209	22.5802	0.00147136	0.182921
FBgn0036449	0.653014	4.73733	22.509	0.00148554	0.182921
FBgn0050035	0.382903	7.07346	22.1949	0.00155013	0.18738
FBgn0083050	0.60399	2.84126	22.1537	0.00155887	0.18738
FBgn0083057	1.21488	2.73098	22.0085	0.00159015	0.188891
FBgn0000533	0.455925	4.87168	21.887	0.00161693	0.189839
FBgn0005612	1.06792	3.29067	21.1636	0.00178863	0.207583
FBgn0261509	0.449014	5.98197	21.0767	0.00181076	0.207764
FBgn0028516	-0.390117	3.24292	20.608	0.00193626	0.219668
FBgn0050372	0.332452	5.77424	20.3368	0.00201387	0.225934
FBgn0036940	0.404216	5.76695	20.2589	0.00203689	0.226005
FBgn0000639	1.3333	3.08178	20.14	0.00207694	0.226329
FBgn0031374	0.302409	6.74653	20.1007	0.00208464	0.226329
FBgn0261675	-0.447416	6.59276	20.0067	0.00211367	0.227039
FBgn0032286	0.958029	5.85004	19.8261	0.00217093	0.230736
FBgn0030098	0.933659	5.45582	19.7334	0.00220106	0.231501
FBgn0033665	-0.832428	4.28775	19.6547	0.00222703	0.231818
FBgn0038783	1.35785	4.9807	19.9775	0.0022788	0.234786
FBgn0036949	0.347728	8.79289	19.2006	0.00238479	0.240356
FBgn0047135	-0.332337	8.46753	18.9523	0.00247702	0.240356
FBgn0035678	0.473	1.87542	18.9313	0.00248502	0.240356
FBgn0263750	0.716424	0.267966	18.8862	0.00250231	0.240356
FBgn0051184	-0.378626	4.02158	18.8447	0.00251835	0.240356
FBgn0052982	0.682785	4.73671	18.7837	0.00254217	0.240356
FBgn0052311	0.321249	8.43197	18.7132	0.00257005	0.240356
FBgn0086558	0.4644	8.10839	18.7033	0.00257403	0.240356
FBgn0037387	0.675729	6.53537	18.6429	0.00259825	0.240356
FBgn0003495	-0.361835	4.43422	18.5308	0.002644	0.240356
FBgn0005561	0.540822	1.24848	18.5061	0.00265425	0.240356
FBgn0053056	0.434575	4.17728	18.5034	0.00265538	0.240356
FBgn0029975	-0.287124	6.57282	18.4938	0.00265933	0.240356
FBgn0033600	-0.722327	9.76401	18.4615	0.00267282	0.240356
FBgn0033443	0.930319	4.76302	18.402	0.00269785	0.240356
FBgn0000180	-0.814027	0.100333	18.3646	0.00271374	0.240356
FBgn0003525	-0.465983	3.41413	18.3043	0.0027396	0.240537
FBgn0034612	-0.587375	3.67084	18.0834	0.00283703	0.246944
FBgn0032436	0.942207	2.71264	18.017	0.00286717	0.247263
FBgn0051739	-0.318222	6.1086	17.968	0.00288967	0.247263
FBgn0052576	-0.295197	4.25848	17.8289	0.00295478	0.248721
FBgn0040340	-0.392373	8.44836	17.8263	0.00295598	0.248721
FBgn0030586	1.86787	0.833932	17.6681	0.00303234	0.252894
FBgn0013678	-1.07597	10.6657	17.9747	0.00306406	0.252894
FBgn0041184	0.729276	5.0861	17.5703	0.00308071	0.252894
FBgn0053460	-0.952431	1.37573	17.4584	0.00313732	0.255464
FBgn0038105	0.37369	3.92633	17.2771	0.0032318	0.257561
FBgn0033501	0.294525	3.79984	17.2321	0.00325582	0.257561
FBgn0039290	0.570688	4.15771	17.2134	0.00326586	0.257561
FBgn0036428	-0.369611	6.10397	17.2037	0.00327106	0.257561
FBgn0033789	0.657647	8.30243	17.1533	0.0032984	0.257561
FBgn0034010	-0.616776	5.61696	17.1208	0.00331613	0.257561
FBgn0022709	0.511066	6.79151	16.9884	0.00338977	0.261271
FBgn0035488	0.347035	3.35477	16.9313	0.00342216	0.261769
FBgn0016031	-0.306476	5.98693	16.8803	0.00345139	0.26202
FBgn0037391	0.430296	4.86038	16.7101	0.00355135	0.263933
FBgn0035949	2.21311	2.7625	17.436	0.00355216	0.263933
FBgn0035813	1.50101	5.31733	17.3263	0.00355521	0.263933
FBgn0085194	1.22561	4.52011	16.9995	0.00358115	0.263933
FBgn0039131	1.17565	4.505	16.8644	0.00364741	0.266869
FBgn0034180	0.258874	5.64279	16.3973	0.00374465	0.272012
FBgn0259715	0.460384	4.30562	16.2884	0.00381503	0.275145
FBgn0039742	1.25049	2.38693	16.1632	0.00389798	0.279134
FBgn0033226	0.321853	5.77489	16.0795	0.00395473	0.279812
FBgn0032587	1.194	4.54623	16.3653	0.00397746	0.279812
FBgn0010300	1.11971	6.33555	16.2537	0.00401675	0.279812
FBgn0040491	1.32623	2.5194	15.9875	0.0040183	0.279812
FBgn0033639	0.274083	3.98926	15.6738	0.00424496	0.291807
FBgn0039250	-0.350811	2.53815	15.6542	0.00425962	0.291807
FBgn0041604	0.424215	4.36995	15.5944	0.00430486	0.291807
FBgn0020386	0.332472	6.56867	15.5927	0.00430616	0.291807
FBgn0263706	0.420667	4.90152	15.4908	0.00438456	0.292378
FBgn0035983	0.31107	3.81418	15.4784	0.00439425	0.292378
FBgn0037007	0.676321	5.69289	15.4692	0.00440146	0.292378
FBgn0039091	1.06797	6.95467	15.5514	0.00444934	0.293628
FBgn0001149	0.497965	9.29833	15.3254	0.00451578	0.294826
FBgn0005626	1.36392	7.20332	15.7079	0.0045259	0.294826
FBgn0035344	0.728109	1.74269	15.0582	0.00473835	0.306209
FBgn0040239	-0.333324	3.87304	15.0316	0.00476129	0.306209
FBgn0037996	-0.25477	9.05578	14.9687	0.00481597	0.307663
FBgn0028950	0.443889	7.37224	14.9359	0.00484484	0.307663
FBgn0000115	-0.243671	5.78679	14.8809	0.00489369	0.308237
FBgn0263485	0.816948	0.576499	14.8572	0.00491495	0.308237
FBgn0000414	0.2721	4.6195	14.7242	0.00503636	0.31154
FBgn0035101	0.36671	5.51733	14.7095	0.00504999	0.31154
FBgn0031248	0.701557	6.06459	14.6656	0.00509104	0.31154
FBgn0260635	0.406112	7.1332	14.6575	0.00509866	0.31154
FBgn0039107	-0.354747	3.33781	14.6329	0.00512188	0.31154
FBgn0259237	0.64034	3.57232	14.5826	0.0051698	0.312113
FBgn0037721	0.493862	4.57517	14.5112	0.00523876	0.312113
FBgn0014865	6.89184	5.51372	15.3816	0.00524548	0.312113
FBgn0035679	0.595539	5.23182	14.4946	0.00525496	0.312113
FBgn0030929	1.30888	6.34168	14.7603	0.0053761	0.317441
FBgn0011787	-0.346621	6.00679	14.3178	0.00543136	0.31884
FBgn0040342	0.87714	1.91132	14.2479	0.00550325	0.321192
FBgn0037279	0.321475	5.55576	14.197	0.0055563	0.322425
FBgn0034335	0.698211	5.73186	14.1353	0.00562141	0.324339
FBgn0259714	0.887952	2.5129	14.0938	0.00566587	0.325047
FBgn0041710	0.66553	1.37889	13.8066	0.00598535	0.341435
FBgn0003377	1.1426	0.641035	13.7194	0.00608682	0.345126
FBgn0039073	-0.277486	5.23046	13.6926	0.00611841	0.345126
FBgn0260945	0.35946	5.29155	13.5834	0.00624941	0.347241
FBgn0003863	0.623119	8.43536	13.5829	0.00625003	0.347241
FBgn0041182	0.332151	6.86849	13.5451	0.00629621	0.347241
FBgn0034053	0.842112	3.46936	13.5422	0.00629975	0.347241
FBgn0032243	0.444553	4.85713	13.4965	0.00635621	0.347241
FBgn0262127	0.30515	3.82502	13.4703	0.00638881	0.347241
FBgn0263773	0.377966	5.83492	13.4452	0.0064203	0.347241
FBgn0037989	-0.50265	5.0103	13.4366	0.00643103	0.347241
FBgn0030999	0.734133	6.40485	13.3945	0.00648444	0.348263
FBgn0039593	-0.377461	2.84664	13.2296	0.0066987	0.356927
FBgn0266410	0.271448	7.88748	13.2163	0.00671645	0.356927
FBgn0264449	0.756594	4.01021	13.1611	0.00679039	0.358966
FBgn0036767	0.621862	5.00734	13.025	0.00697725	0.362192
FBgn0038098	-0.316667	6.06023	13.0183	0.00698659	0.362192
FBgn0053926	1.15517	3.32496	13.1917	0.00698828	0.362192
FBgn0261789	-0.223315	4.99276	12.9909	0.00702505	0.362192
FBgn0264776	0.624218	4.09897	12.9624	0.00706531	0.362192
FBgn0264678	-0.752026	0.838286	12.9614	0.00706664	0.362192
FBgn0001301	0.720639	6.02715	12.8602	0.00721216	0.367693
FBgn0052137	0.240717	5.82459	12.8364	0.0072468	0.367693
FBgn0013984	0.513445	5.53225	12.8054	0.00729248	0.368161
FBgn0086346	0.277505	6.65667	12.6868	0.0074701	0.373317
FBgn0033614	0.820566	0.63622	12.6736	0.00749031	0.373317
FBgn0036519	-0.240233	3.55539	12.6636	0.00750554	0.373317
FBgn0026777	-0.22013	6.93585	12.5854	0.00762649	0.376958
FBgn0259740	-0.607336	4.79641	12.5673	0.00765469	0.376958
FBgn0264907	0.461976	5.04676	12.5331	0.00770857	0.376958
FBgn0038740	-0.375505	8.41591	12.4983	0.0077639	0.376958
FBgn0035781	0.489315	8.8161	12.4974	0.0077654	0.376958
FBgn0015569	-0.379231	5.64994	12.4121	0.00790319	0.378066
FBgn0040060	0.565643	8.91004	12.3812	0.00795391	0.378066
FBgn0265104	-0.49962	1.61405	12.3741	0.00796548	0.378066
FBgn0038681	0.697117	6.04	12.3637	0.00798273	0.378066
FBgn0260756	0.524549	1.54577	12.352	0.00800207	0.378066
FBgn0030829	1.70993	1.03488	12.3455	0.00801289	0.378066
FBgn0037163	0.746906	2.29399	12.2922	0.00810202	0.380494
FBgn0035144	0.690547	1.19192	12.2434	0.00818481	0.382602
FBgn0052512	-0.433691	1.96838	12.1919	0.00827331	0.382737
FBgn0046253	1.61802	4.18172	12.7126	0.00829594	0.382737
FBgn0031359	0.243474	4.87114	12.1317	0.00837828	0.382737
FBgn0038744	-0.260144	4.56118	12.1146	0.00840845	0.382737
FBgn0003930	1.64422	3.98834	12.6209	0.00844606	0.382737
FBgn0029003	-0.236206	4.02953	12.0822	0.0084659	0.382737
FBgn0033207	1.5934	2.76775	12.3641	0.00846921	0.382737
FBgn0010638	-0.247644	7.89693	12.0681	0.00849095	0.382737
FBgn0263397	0.23881	5.3117	12.0403	0.0085409	0.38274
FBgn0016978	-0.221018	5.65264	12.0259	0.00856684	0.38274
FBgn0000568	0.850214	6.3364	12.0058	0.00866206	0.38529
FBgn0039099	0.935251	0.365676	11.9192	0.00876248	0.385981
FBgn0039685	1.48084	2.38384	12.0885	0.00880937	0.385981
FBgn0033788	1.1617	7.7361	12.136	0.00882144	0.385981
FBgn0083987	0.733919	7.02065	11.8419	0.00890768	0.385981
FBgn0041721	0.712557	4.85483	11.8419	0.00890768	0.385981
FBgn0085261	-0.542776	5.48899	11.7886	0.00900951	0.385981
FBgn0040817	0.866944	5.1267	11.8299	0.00905545	0.385981
FBgn0038037	0.271602	6.97818	11.7636	0.00905786	0.385981
FBgn0034958	-0.226379	4.66727	11.7521	0.0090802	0.385981
FBgn0035977	0.959186	2.88287	11.7477	0.00908878	0.385981
FBgn0004183	1.09894	2.25713	11.7237	0.00913577	0.385981
FBgn0031929	-0.408847	6.69674	11.7234	0.00913633	0.385981
FBgn0040348	0.460466	1.0009	11.6845	0.00921289	0.386267
FBgn0001168	0.474769	5.54515	11.6772	0.00922743	0.386267
FBgn0039846	-0.208779	5.07751	11.6601	0.00926139	0.386267
FBgn0004187	1.06347	1.54316	11.6427	0.00929612	0.386267
FBgn0032198	-0.401293	8.1338	11.6082	0.00936552	0.386639
FBgn0052557	0.416089	3.11178	11.6003	0.00938165	0.386639
FBgn0002578	0.50944	6.12503	11.5799	0.00942295	0.386762
FBgn0052170	0.469073	3.33993	11.5478	0.00948874	0.387517
FBgn0036116	1.04121	4.10042	11.6787	0.00959804	0.387517
FBgn0039856	0.918974	5.66216	11.6449	0.00959805	0.387517
FBgn0050431	0.934919	2.86312	11.4509	0.0096906	0.387517
FBgn0267073	0.688763	1.21304	11.4467	0.00969938	0.387517
FBgn0040096	-0.613978	1.17676	11.4316	0.00973147	0.387517
FBgn0039124	1.52276	0.792795	11.4298	0.00973516	0.387517
FBgn0053986	0.897318	2.4067	11.385	0.00983097	0.387517
FBgn0035592	-0.268207	5.11106	11.3777	0.00984668	0.387517
FBgn0028519	1.40642	3.7097	11.7355	0.00985097	0.387517
FBgn0263256	0.610509	5.78902	11.3699	0.00986352	0.387517
FBgn0261108	0.236226	4.71154	11.3441	0.00991929	0.388198
FBgn0028948	-0.506542	3.43772	11.3145	0.00998404	0.388602
FBgn0029161	-0.595861	2.74663	11.3042	0.0100066	0.388602
FBgn0034553	1.03771	5.03389	11.4654	0.0100938	0.389227
FBgn0014020	-0.191236	8.31218	11.26	0.0101042	0.389227
FBgn0043005	0.497773	1.25986	11.2285	0.0101747	0.389227
FBgn0263234	0.520415	5.06379	11.2198	0.0101943	0.389227
FBgn0039613	-0.235648	5.34201	11.1891	0.0102637	0.389227
FBgn0263463	0.834226	1.77676	11.1808	0.0102825	0.389227
FBgn0025835	0.864824	4.00057	11.1988	0.0102925	0.389227
FBgn0038842	0.432382	5.84219	11.157	0.0103367	0.389437
FBgn0036680	1.1952	0.893879	11.0824	0.0105094	0.394474
FBgn0044011	0.702689	0.114095	10.9769	0.0107596	0.398695
FBgn0037222	0.828976	4.17751	10.9692	0.0107999	0.398695
FBgn0259211	0.383008	6.38893	10.9451	0.0108365	0.398695
FBgn0030451	-0.397012	4.57165	10.9247	0.0108862	0.398695
FBgn0032087	0.553524	5.51501	10.8855	0.0109826	0.398695
FBgn0030594	0.639747	4.43847	10.8742	0.0110104	0.398695
FBgn0031000	0.395189	8.00769	10.8433	0.0110875	0.398695
FBgn0085466	-0.536288	3.00913	10.8271	0.0111282	0.398695
FBgn0035888	-0.823581	3.11619	10.8239	0.0111362	0.398695
FBgn0034110	0.353796	4.84402	10.8206	0.0111446	0.398695
FBgn0000416	0.232622	8.66986	10.8195	0.0111472	0.398695
FBgn0037102	-0.289658	5.13561	10.8121	0.0111658	0.398695
FBgn0036990	-0.207149	5.61414	10.8021	0.0111912	0.398695
FBgn0034796	0.465538	2.78094	10.7911	0.0112189	0.398695
FBgn0041630	0.328068	6.04597	10.7492	0.0113259	0.398695
FBgn0051431	0.319737	4.38912	10.674	0.0115212	0.398695
FBgn0083003	0.739421	4.15145	10.6442	0.0115999	0.398695
FBgn0038654	-0.766818	2.39367	10.6038	0.0117073	0.398695
FBgn0030052	0.25475	5.61695	10.5865	0.0117538	0.398695
FBgn0035083	-0.32688	8.21006	10.5837	0.0117612	0.398695
FBgn0035006	-0.26296	7.72198	10.5821	0.0117657	0.398695
FBgn0030928	0.627443	5.4693	10.5749	0.0117851	0.398695
FBgn0020236	-0.318682	9.95876	10.5703	0.0117975	0.398695
FBgn0051720	0.503291	3.08245	10.5649	0.0118123	0.398695
FBgn0004838	-0.382539	8.81528	10.5491	0.011855	0.398695
FBgn0031184	-0.375923	4.07429	10.5406	0.0118783	0.398695
FBgn0013733	0.561241	10.7169	10.5371	0.0118876	0.398695
FBgn0015522	0.736625	4.38542	10.5336	0.0118974	0.398695
FBgn0264848	-0.231055	3.97617	10.5326	0.0119002	0.398695
FBgn0012037	0.240378	8.51996	10.5171	0.0119426	0.398695
FBgn0061492	-0.388857	6.27569	10.5153	0.0119476	0.398695
FBgn0003301	0.523741	5.13451	10.5128	0.0119543	0.398695
FBgn0039051	0.222792	7.55456	10.512	0.0119565	0.398695
FBgn0003943	0.523515	8.52596	10.5038	0.0119792	0.398695
FBgn0032693	-0.414523	4.47516	10.4946	0.0120046	0.398695
FBgn0003231	0.653963	7.19756	10.4806	0.0120434	0.398695
FBgn0034293	0.718465	2.41319	10.4602	0.0121	0.398747
FBgn0032284	1.44445	3.21782	10.7504	0.0121239	0.398747
FBgn0032405	1.91353	1.96999	10.6812	0.0122455	0.401438
FBgn0037126	-0.492046	2.9909	10.3457	0.0124252	0.40601
FBgn0010381	3.56501	2.19954	10.8014	0.0125387	0.408397
FBgn0266711	-0.248201	4.94312	10.2862	0.0125985	0.409025
FBgn0034494	0.330191	5.81591	10.262	0.0126698	0.410023
FBgn0003141	-0.217288	5.21106	10.2367	0.0127448	0.410641
FBgn0000097	0.453454	4.28815	10.2212	0.0127912	0.410641
FBgn0030959	-0.327186	3.55097	10.2146	0.0128109	0.410641
FBgn0038700	-0.237565	7.4023	10.1865	0.0128956	0.412047
FBgn0263488	0.750583	4.70483	10.0915	0.013187	0.417913
FBgn0004435	-0.349113	4.81586	10.0687	0.0132581	0.417913
FBgn0011828	-0.32375	6.65511	10.0201	0.0134115	0.417913
FBgn0264695	0.135024	14.2405	9.99215	0.0135008	0.417913
FBgn0034162	1.24953	5.98628	10.2904	0.0136128	0.417913
FBgn0034808	-0.391006	3.54057	9.95585	0.0136178	0.417913
FBgn0003886	0.295788	6.77334	9.95278	0.0136277	0.417913
FBgn0036952	0.345172	9.32941	9.94665	0.0136477	0.417913
FBgn0043470	0.419701	6.90672	9.93422	0.0136881	0.417913
FBgn0032895	0.382818	2.28732	9.92945	0.0137037	0.417913
FBgn0036608	1.63527	6.86329	10.3571	0.0137434	0.417913
FBgn0037374	-0.19452	6.69373	9.91396	0.0137544	0.417913
FBgn0263093	0.94576	1.29872	9.90657	0.0137787	0.417913
FBgn0030305	-0.401061	6.30841	9.89705	0.01381	0.417913
FBgn0020521	0.454753	7.10081	9.89266	0.0138245	0.417913
FBgn0051777	-0.214048	3.50481	9.88657	0.0138446	0.417913
FBgn0030520	0.374865	6.153	9.87419	0.0138857	0.417913
FBgn0030574	-0.308689	6.33987	9.87366	0.0138874	0.417913
FBgn0036240	0.408979	3.30994	9.8664	0.0139116	0.417913
FBgn0030991	-0.187894	5.18206	9.86339	0.0139216	0.417913
FBgn0024945	0.25125	4.26016	9.85225	0.0139588	0.417913
FBgn0082963	0.615979	3.62554	9.83515	0.0140161	0.417913
FBgn0014427	0.558355	6.02133	9.82107	0.0140635	0.417913
FBgn0043578	4.60404	4.50306	10.2743	0.0140725	0.417913
FBgn0266666	-0.304114	5.93313	9.79512	0.0141514	0.417924
FBgn0035336	-0.516059	3.15784	9.78578	0.0141832	0.417924
FBgn0037203	0.616615	5.61413	9.76754	0.0142456	0.417924
FBgn0051198	0.230323	10.2976	9.76662	0.0142488	0.417924
FBgn0000492	-0.502816	1.55212	9.75756	0.0142799	0.417924
FBgn0042175	0.386911	2.00951	9.74289	0.0143305	0.418193
FBgn0035854	-0.287859	3.78828	9.70418	0.014465	0.418632
FBgn0004959	-0.644245	1.62672	9.69027	0.0145138	0.418632
FBgn0034075	-0.301157	6.74048	9.66732	0.0145946	0.418632
FBgn0266448	0.357298	5.99945	9.63353	0.0147147	0.418632
FBgn0266450	0.719583	2.90567	9.63152	0.0147219	0.418632
FBgn0033996	0.237284	4.27174	9.61362	0.0147861	0.418632
FBgn0033205	0.583671	5.87005	9.61043	0.0147975	0.418632
FBgn0052483	-0.232711	6.64001	9.6064	0.0148121	0.418632
FBgn0033592	0.917707	1.97556	9.59762	0.0148437	0.418632
FBgn0033317	-0.283611	6.57747	9.59234	0.0148628	0.418632
FBgn0000244	0.490969	6.47389	9.5898	0.014872	0.418632
FBgn0033927	0.40284	3.80962	9.58664	0.0148835	0.418632
FBgn0032774	0.441097	5.80471	9.58635	0.0148845	0.418632
FBgn0034160	1.58872	6.87053	9.96408	0.0150118	0.421041
FBgn0032407	-0.224002	7.28537	9.51065	0.0151622	0.424078
FBgn0028540	0.235844	5.42193	9.45784	0.0153597	0.427369
FBgn0010348	-0.229509	9.21168	9.44993	0.0153896	0.427369
FBgn0036766	0.388114	7.15975	9.43005	0.015465	0.427369
FBgn0051710	-0.374455	3.10301	9.42622	0.0154795	0.427369
FBgn0030655	0.334957	2.1487	9.40889	0.0155457	0.427369
FBgn0040284	-0.23918	6.45045	9.40822	0.0155483	0.427369
FBgn0000395	0.287405	3.66811	9.40097	0.0155761	0.427369
FBgn0031732	0.290177	4.44397	9.37824	0.0156637	0.428607
FBgn0033500	0.531968	0.351181	9.35459	0.0157554	0.429892
FBgn0038220	0.256989	5.43384	9.34425	0.0157958	0.429892
FBgn0024150	0.332125	4.20213	9.33295	0.01584	0.429937
FBgn0051337	-0.776389	1.15203	9.30392	0.0159543	0.431536
FBgn0266428	0.681227	1.59191	9.29633	0.0159844	0.431536
FBgn0052267	-0.372545	5.45251	9.25793	0.0161376	0.433373
FBgn0014879	-0.511224	5.24188	9.24292	0.016198	0.433373
FBgn0004552	0.458043	0.934011	9.22199	0.0162827	0.433373
FBgn0031959	0.551258	4.76293	9.21579	0.0163079	0.433373
FBgn0037363	0.265735	5.19178	9.21572	0.0163082	0.433373
FBgn0027585	0.347036	6.52875	9.20654	0.0163456	0.433373
FBgn0028622	0.573203	6.04826	9.1926	0.0164026	0.433373
FBgn0052237	0.63485	5.21643	9.18219	0.0164453	0.433373
FBgn0033177	0.273759	2.71474	9.17995	0.0164545	0.433373
FBgn0033437	-0.290311	4.55468	9.17336	0.0164816	0.433373
FBgn0065046	1.37464	4.7765	9.45988	0.0167007	0.437992
FBgn0037230	0.906122	6.37467	9.22882	0.016803	0.438902
FBgn0038861	0.243428	3.20514	9.09178	0.0168223	0.438902
FBgn0038325	0.288849	3.37027	9.07517	0.0168928	0.439604
FBgn0039008	-0.213671	5.1844	9.04439	0.0170243	0.441888
FBgn0034552	1.24561	2.81869	9.16209	0.0171506	0.444024
FBgn0038832	0.49663	5.01857	8.98998	0.01726	0.444816
FBgn0033033	0.276231	7.68475	8.98786	0.0172693	0.444816
FBgn0036951	0.253809	7.47892	8.96958	0.0173495	0.445744
FBgn0033580	0.675648	0.415986	8.94607	0.0174533	0.447273
FBgn0263832	0.239436	3.79764	8.92399	0.0175514	0.448651
FBgn0261990	0.524323	4.97776	8.88797	0.0177131	0.450087
FBgn0030582	-0.259004	4.60286	8.86385	0.0178225	0.450087
FBgn0030148	-0.414821	8.38459	8.848	0.0178948	0.450087
FBgn0037228	-0.469833	4.86681	8.83567	0.0179513	0.450087
FBgn0031389	-0.669702	4.03868	8.8325	0.0179659	0.450087
FBgn0035787	1.23689	4.70086	9.11996	0.0179712	0.450087
FBgn0028426	-0.232569	4.51916	8.83044	0.0179753	0.450087
FBgn0030480	-0.252153	5.3688	8.81591	0.0180423	0.450087
FBgn0028473	0.34937	8.00003	8.81243	0.0180584	0.450087
FBgn0000043	-0.293104	7.54855	8.80214	0.0181061	0.450087
FBgn0010620	-0.242436	5.6818	8.80038	0.0181142	0.450087
FBgn0003965	0.367678	5.55501	8.79429	0.0181426	0.450087
FBgn0036226	0.410473	6.31148	8.78433	0.018189	0.450134
FBgn0001280	-0.227643	4.72649	8.77202	0.0182466	0.450255
FBgn0032261	-0.256176	4.4173	8.76424	0.0182831	0.450255
FBgn0243512	0.234962	5.38542	8.73387	0.0184265	0.452683
FBgn0250871	0.274932	7.22523	8.72297	0.0184783	0.452854
FBgn0033209	-0.174261	5.61344	8.70461	0.018566	0.453902
FBgn0004611	0.262424	5.35668	8.67414	0.0187128	0.455492
FBgn0032005	-0.254166	5.45246	8.67237	0.0187213	0.455492
FBgn0028534	0.702621	7.27184	8.65449	0.0188082	0.455654
FBgn0032281	1.35616	2.3984	8.79378	0.0188183	0.455654
FBgn0040319	-0.338552	7.12078	8.64318	0.0188634	0.455654
FBgn0265274	0.304674	5.96703	8.61361	0.0190086	0.456276
FBgn0004369	0.269714	4.08562	8.61157	0.0190187	0.456276
FBgn0037652	-0.262196	6.12404	8.60749	0.0190389	0.456276
FBgn0036133	-0.274642	5.87996	8.59262	0.0191126	0.456276
FBgn0039312	-0.437819	6.21094	8.59212	0.0191151	0.456276
FBgn0261983	0.240468	4.69356	8.56636	0.0192437	0.458263
FBgn0038886	-0.475717	3.10533	8.53542	0.0193996	0.459111
FBgn0053263	1.63223	4.24372	8.89497	0.0193999	0.459111
FBgn0259481	0.184906	5.23154	8.53224	0.0194157	0.459111
FBgn0263144	-0.300054	6.06055	8.5189	0.0194835	0.459637
FBgn0262588	-0.609164	3.81368	8.48914	0.0196358	0.46033
FBgn0034296	0.28917	7.58164	8.48859	0.0196386	0.46033
FBgn0036665	1.32022	5.23051	8.78537	0.019656	0.46033
FBgn0032721	0.226476	7.97639	8.4776	0.0196952	0.46033
FBgn0031413	0.613109	2.84967	8.45718	0.019801	0.460784
FBgn0264694	-0.219129	6.119	8.45624	0.0198059	0.460784
FBgn0038484	0.910214	6.28297	8.57359	0.0199006	0.461527
FBgn0000003	4.68123	8.58238	8.74356	0.0201329	0.461527
FBgn0033982	-0.239367	3.97449	8.36843	0.0202692	0.461527
FBgn0263607	0.294304	3.70986	8.36539	0.0202855	0.461527
FBgn0033387	1.60747	4.88969	8.69383	0.0203813	0.461527
FBgn0029867	-0.32951	5.12382	8.33955	0.0204246	0.461527
FBgn0082986	0.732745	1.79011	8.33436	0.0204526	0.461527
FBgn0030502	-0.181188	5.0524	8.32847	0.0204845	0.461527
FBgn0032886	-0.301153	4.03081	8.32649	0.0204953	0.461527
FBgn0030763	-0.803112	5.57177	8.42687	0.0205038	0.461527
FBgn0041713	0.36354	5.45591	8.31428	0.0205617	0.461527
FBgn0030788	-0.432196	3.4503	8.31053	0.0205822	0.461527
FBgn0036094	1.43662	0.250607	8.2977	0.0206523	0.461527
FBgn0086666	0.340225	5.68903	8.28684	0.020712	0.461527
FBgn0053465	-1.15602	2.31482	8.35987	0.0207331	0.461527
FBgn0039944	0.439832	0.505252	8.27349	0.0207856	0.461527
FBgn0038180	0.562938	5.93217	8.26893	0.0208108	0.461527
FBgn0051217	0.301559	3.47721	8.26609	0.0208265	0.461527
FBgn0035777	1.30963	6.7598	8.54512	0.0208372	0.461527
FBgn0029929	-0.231031	4.6739	8.25961	0.0208625	0.461527
FBgn0041180	-0.322946	8.23331	8.25152	0.0209075	0.461527
FBgn0014018	0.400177	6.35122	8.25122	0.0209091	0.461527
FBgn0003975	-0.633428	0.174002	8.24903	0.0209213	0.461527
FBgn0001215	-0.237921	6.58458	8.23877	0.0209786	0.461527
FBgn0032916	-0.240483	4.80484	8.23841	0.0209806	0.461527
FBgn0052672	0.513274	6.54244	8.22372	0.0210629	0.462332
FBgn0030571	-0.310429	2.40134	8.1977	0.0212098	0.463773
FBgn0050479	-0.672626	0.640126	8.19125	0.0212464	0.463773
FBgn0035763	0.190757	5.91167	8.17076	0.0213633	0.463773
FBgn0027547	0.233005	6.80534	8.16219	0.0214124	0.463773
FBgn0028949	-0.509181	3.52664	8.16031	0.0214232	0.463773
FBgn0037646	0.523241	4.36459	8.12734	0.0216135	0.463773
FBgn0052594	0.332397	4.83299	8.11815	0.0216669	0.463773
FBgn0027594	0.210604	5.71659	8.11789	0.0216684	0.463773
FBgn0000259	-0.241891	6.50027	8.11672	0.0216753	0.463773
FBgn0036733	-0.209916	3.83604	8.10612	0.0217371	0.463773
FBgn0034289	0.4098	9.28654	8.1015	0.0217642	0.463773
FBgn0041147	-0.251094	2.51794	8.09447	0.0218054	0.463773
FBgn0262624	0.303623	4.83902	8.09255	0.0218167	0.463773
FBgn0036266	-0.327264	2.5192	8.09251	0.0218169	0.463773
FBgn0259170	-0.333697	5.84848	8.08671	0.021851	0.463773
FBgn0034573	0.304281	4.57375	8.08112	0.021884	0.463773
FBgn0038808	-0.242159	5.38494	8.07242	0.0219354	0.463773
FBgn0041579	5.30685	6.39554	8.39591	0.0219554	0.463773
FBgn0035534	-0.235385	4.13923	8.0428	0.0221115	0.463978
FBgn0064237	0.30123	5.74369	8.04271	0.022112	0.463978
FBgn0030321	-0.350246	7.00674	8.04215	0.0221154	0.463978
FBgn0039356	0.479023	0.206202	8.03655	0.0221489	0.463978
FBgn0036257	0.222812	5.34777	8.0131	0.0222899	0.465964
FBgn0033830	0.96054	6.75116	8.13385	0.0223982	0.466223
FBgn0019925	-0.436363	7.84373	7.99	0.0224299	0.466223
FBgn0000551	1.00039	3.81872	8.11607	0.0224787	0.466223
FBgn0040233	-0.209292	6.44365	7.98064	0.0224869	0.466223
FBgn0032699	0.607945	5.26072	7.97019	0.0225509	0.46659
FBgn0004629	0.658237	7.58006	7.95445	0.0226476	0.467151
FBgn0037870	0.574991	2.86499	7.95073	0.0226705	0.467151
FBgn0026576	-0.188935	6.89239	7.94225	0.0227229	0.467276
FBgn0030109	-0.174221	5.45704	7.92274	0.0228439	0.468811
FBgn0038981	0.307325	5.74579	7.90025	0.0229845	0.470519
FBgn0262579	0.191898	8.3969	7.89455	0.0230204	0.470519
FBgn0034032	0.39965	3.33009	7.87773	0.0231264	0.471256
FBgn0016926	0.429971	6.93718	7.87404	0.0231498	0.471256
FBgn0030995	0.447422	1.28456	7.85041	0.0233	0.472636
FBgn0001297	0.299981	6.86347	7.84867	0.0233111	0.472636
FBgn0052579	0.404667	2.67443	7.82994	0.0234312	0.473659
FBgn0036320	0.372437	4.27883	7.81642	0.0235183	0.473659
FBgn0036361	0.273632	6.62414	7.81419	0.0235328	0.473659
FBgn0028886	0.298108	5.14516	7.81165	0.0235492	0.473659
FBgn0030993	0.385213	5.30309	7.80428	0.0235969	0.473674
FBgn0039818	0.371967	4.39089	7.7877	0.0237048	0.474436
FBgn0250757	0.359031	6.27372	7.77842	0.0237655	0.474436
FBgn0010497	0.319584	6.77165	7.77138	0.0238117	0.474436
FBgn0020910	0.150311	11.1937	7.76716	0.0238394	0.474436
FBgn0035193	2.15794	4.71488	8.06404	0.0238978	0.474436
FBgn0037737	-0.349947	3.38991	7.75344	0.0239298	0.474436
FBgn0050339	-0.414911	4.79431	7.74829	0.0239638	0.474436
FBgn0030105	0.961809	1.82895	7.71709	0.0241714	0.477303
FBgn0030160	0.501527	7.14622	7.71172	0.0242073	0.477303
FBgn0038810	-0.407659	6.34802	7.7053	0.0242504	0.477303
FBgn0038428	-0.195812	5.12486	7.69497	0.0243199	0.477739
FBgn0035497	0.360057	5.33633	7.67728	0.0244395	0.479157
FBgn0039316	0.961474	6.93074	7.79724	0.0245221	0.479348
FBgn0039313	-0.32716	7.32164	7.66189	0.0245442	0.479348
FBgn0033649	0.496216	3.28306	7.64246	0.0246771	0.481013
FBgn0259878	0.387606	1.37486	7.62548	0.0247941	0.481402
FBgn0260462	0.352029	6.6578	7.61287	0.0248814	0.481402
FBgn0034061	-0.176938	5.86844	7.60728	0.0249202	0.481402
FBgn0015035	1.5887	1.76006	7.72015	0.0250392	0.481402
FBgn0039611	0.310486	5.41061	7.58602	0.0250686	0.481402
FBgn0037963	0.2407	6.14847	7.57819	0.0251235	0.481402
FBgn0266633	0.515938	1.12187	7.57788	0.0251257	0.481402
FBgn0038505	1.76847	3.65146	7.86788	0.0251505	0.481402
FBgn0004509	0.281168	6.41345	7.57156	0.0251701	0.481402
FBgn0010391	-0.373059	7.25508	7.5555	0.0252835	0.481402
FBgn0010397	0.348828	8.082	7.55425	0.0252924	0.481402
FBgn0029133	-0.198954	7.06879	7.55057	0.0253185	0.481402
FBgn0031238	-0.250434	3.27043	7.54793	0.0253372	0.481402
FBgn0039637	0.212443	5.79693	7.54408	0.0253646	0.481402
FBgn0032797	0.226687	3.88915	7.52578	0.0254951	0.482971
FBgn0044452	0.198761	5.91986	7.51287	0.0255877	0.483818
FBgn0024889	-0.193429	6.26401	7.48037	0.0258227	0.485979
FBgn0051259	-0.238145	5.54899	7.47775	0.0258418	0.485979
FBgn0024293	0.403289	6.11849	7.45754	0.0259894	0.485979
FBgn0053985	0.537596	3.33901	7.44978	0.0260464	0.485979
FBgn0036287	0.55222	2.76694	7.44378	0.0260906	0.485979
FBgn0010039	0.182858	4.48152	7.44037	0.0261157	0.485979
FBgn0035294	-0.288164	3.39118	7.42492	0.0262299	0.485979
FBgn0035473	-0.204982	6.66752	7.42486	0.0262304	0.485979
FBgn0069056	-0.630398	1.40038	7.4181	0.0262806	0.485979
FBgn0042696	-0.295629	5.55068	7.39867	0.0264256	0.485979
FBgn0027550	0.335998	1.58023	7.39705	0.0264378	0.485979
FBgn0035267	0.313388	1.62761	7.38865	0.0265008	0.485979
FBgn0039186	-0.323413	4.88618	7.37846	0.0265775	0.485979
FBgn0015298	-0.252017	5.22542	7.37617	0.0265948	0.485979
FBgn0011509	-0.250568	5.97332	7.37166	0.0266289	0.485979
FBgn0040066	-0.370724	3.63961	7.36569	0.026674	0.485979
FBgn0035980	-0.261744	4.23982	7.3603	0.0267149	0.485979
FBgn0000250	0.15633	7.33133	7.35895	0.0267252	0.485979
FBgn0001075	0.25245	6.10834	7.35895	0.0267252	0.485979
FBgn0035249	-0.297808	2.78856	7.34306	0.0268462	0.485979
FBgn0032022	0.836163	2.78499	7.33861	0.0268802	0.485979
FBgn0015543	-0.395913	1.85135	7.33266	0.0269259	0.485979
FBgn0085478	0.283431	5.0797	7.33223	0.0269291	0.485979
FBgn0031907	0.330047	4.41024	7.32629	0.0269748	0.485979
FBgn0037092	0.266599	4.503	7.32467	0.0269872	0.485979
FBgn0004426	0.325055	6.5675	7.32219	0.0270063	0.485979
FBgn0004066	-0.197174	6.73616	7.31937	0.027028	0.485979
FBgn0038286	0.330443	6.59574	7.31445	0.0270659	0.485979
FBgn0264979	0.978328	4.64824	7.45999	0.0271017	0.485979
FBgn0032101	-0.219529	4.76057	7.3013	0.0271677	0.485979
FBgn0040208	0.269674	4.92977	7.2979	0.027194	0.485979
FBgn0027493	0.343835	8.34473	7.27895	0.0273418	0.487219
FBgn0033170	0.816954	1.38153	7.27315	0.0273871	0.487219
FBgn0035631	-0.179225	6.28901	7.27046	0.0274082	0.487219
FBgn0264488	0.192914	8.76001	7.25615	0.0275207	0.48836
FBgn0031049	-0.300236	6.972	7.23156	0.0277155	0.490485
FBgn0031975	0.490733	5.89485	7.22877	0.0277377	0.490485
FBgn0052549	-0.255222	6.08366	7.21611	0.0278387	0.491349
FBgn0004396	-0.350781	6.22696	7.2075	0.0279077	0.491349
FBgn0032725	-0.22632	5.76565	7.18758	0.0280682	0.491349
FBgn0260940	-0.227646	3.82474	7.17827	0.0281436	0.491349
FBgn0037330	-0.163982	5.80314	7.17754	0.0281494	0.491349
FBgn0030316	0.236081	2.33934	7.17039	0.0282075	0.491349
FBgn0039507	0.168737	4.65456	7.16574	0.0282454	0.491349
FBgn0038416	0.224224	4.25316	7.15629	0.0283225	0.491349
FBgn0034489	1.42726	3.28818	7.37985	0.0283319	0.491349
FBgn0032358	0.353215	3.48385	7.14266	0.0284343	0.491349
FBgn0035357	-0.669131	0.496731	7.14164	0.0284427	0.491349
FBgn0015024	-0.279673	6.49745	7.12866	0.0285496	0.491349
FBgn0051759	-0.228566	3.89026	7.1245	0.028584	0.491349
FBgn0052475	0.21177	4.11162	7.12147	0.028609	0.491349
FBgn0025621	0.182642	5.37537	7.12008	0.0286206	0.491349
FBgn0267384	-0.195561	5.79255	7.11537	0.0286596	0.491349
FBgn0058006	0.24244	5.93259	7.11212	0.0286866	0.491349
FBgn0003162	0.444012	5.41455	7.1116	0.0286909	0.491349
FBgn0083010	0.615571	4.93853	7.10917	0.0287111	0.491349
FBgn0039411	0.566012	0.642003	7.09923	0.0287939	0.491933
FBgn0032727	0.30484	4.27707	7.08388	0.0289225	0.49303
FBgn0030686	-0.27898	5.66964	7.07774	0.0289741	0.49303
FBgn0003507	-0.198605	3.90443	7.07263	0.0290171	0.49303
FBgn0086027	0.72947	1.33508	7.06833	0.0290535	0.49303
FBgn0053129	-0.339102	8.32579	7.05541	0.0291628	0.494055
FBgn0036928	-0.30689	6.98167	7.03537	0.0293335	0.495819
FBgn0039730	-0.514504	2.7987	7.03132	0.0293681	0.495819
FBgn0000057	0.209969	4.10957	7.02209	0.0294473	0.495819
FBgn0038074	0.903632	7.73611	7.12722	0.0294633	0.495819
FBgn0030240	-0.196775	3.68828	7.00638	0.0295826	0.496998
FBgn0045063	-0.482084	4.92864	6.95967	0.0299897	0.501655
FBgn0030206	0.206378	2.62851	6.95784	0.0300057	0.501655
FBgn0036759	0.300301	5.00457	6.9566	0.0300167	0.501655
FBgn0038234	-0.238266	4.6612	6.94988	0.0300759	0.501655
FBgn0050203	0.409735	3.04195	6.94118	0.0301528	0.501655
FBgn0027356	-0.173308	8.39276	6.93784	0.0301824	0.501655
FBgn0026751	-0.308692	2.62293	6.93499	0.0302076	0.501655
FBgn0036948	0.650589	9.12554	6.95899	0.0303193	0.502683
FBgn0034717	-0.161013	5.66337	6.88068	0.0306945	0.507058
FBgn0020255	-0.199036	8.53338	6.87512	0.0307448	0.507058
FBgn0036602	0.9307	2.04364	6.87279	0.030766	0.507058
FBgn0033400	-0.218384	4.41131	6.86981	0.030793	0.507058
FBgn0033919	0.236382	6.73924	6.86528	0.0308343	0.507058
FBgn0040397	0.34777	5.89823	6.85714	0.0309085	0.507141
FBgn0032401	0.860312	2.44176	6.84801	0.030992	0.507141
FBgn0030679	0.264782	5.48994	6.83716	0.0310917	0.507141
FBgn0035957	0.499939	0.690226	6.8267	0.0311882	0.507141
FBgn0034507	1.56982	1.61873	6.93496	0.0311909	0.507141
FBgn0262737	0.362436	5.92963	6.81764	0.0312721	0.507141
FBgn0030749	-0.241398	6.29337	6.81671	0.0312806	0.507141
FBgn0036974	-0.214088	8.10597	6.81518	0.0312949	0.507141
FBgn0039809	0.957409	2.02269	6.81431	0.0313029	0.507141
FBgn0027578	0.25392	6.35465	6.7975	0.0314594	0.507141
FBgn0263831	0.418341	0.945865	6.79193	0.0315115	0.507141
FBgn0038629	0.343317	3.81851	6.79019	0.0315278	0.507141
FBgn0051450	-0.26277	5.79729	6.78673	0.0315602	0.507141
FBgn0265988	0.243564	5.00731	6.77212	0.0316977	0.507141
FBgn0027094	-0.257514	7.80792	6.77047	0.0317133	0.507141
FBgn0042083	-0.186614	6.29013	6.76774	0.031739	0.507141
FBgn0039094	0.337504	6.81485	6.7639	0.0317753	0.507141
FBgn0038167	-0.246516	4.34667	6.76367	0.0317775	0.507141
FBgn0038919	0.708245	3.01189	6.76196	0.0317936	0.507141
FBgn0030719	-0.302365	8.48594	6.74597	0.0319455	0.507599
FBgn0030360	0.256293	4.00296	6.74458	0.0319587	0.507599
FBgn0033971	0.226953	2.8366	6.74307	0.0319731	0.507599
FBgn0031653	0.475916	11.0794	6.73195	0.0320794	0.508486
FBgn0032251	0.281273	2.24561	6.72564	0.0321399	0.508647
FBgn0034894	0.287872	4.26242	6.71606	0.032232	0.509306
FBgn0029766	0.690935	6.40202	6.74262	0.032423	0.511524
FBgn0035358	0.403456	4.67512	6.69058	0.0324787	0.511603
FBgn0085453	0.317165	3.27467	6.6652	0.0327267	0.514278
FBgn0013811	0.50856	0.598656	6.66279	0.0327504	0.514278
FBgn0030717	-0.169767	4.40134	6.65466	0.0328305	0.514735
FBgn0032078	-0.199688	3.86941	6.64897	0.0328866	0.514816
FBgn0004186	0.823012	0.63609	6.64324	0.0329433	0.514905
FBgn0010041	0.738918	4.54359	6.70185	0.0330437	0.51524
FBgn0039609	0.498435	4.75056	6.6308	0.0330668	0.51524
FBgn0032330	0.335944	5.13565	6.62247	0.0331499	0.515467
FBgn0026378	0.215916	3.93411	6.61911	0.0331835	0.515467
FBgn0026376	0.279211	5.73421	6.60316	0.0333434	0.5157
FBgn0083042	0.558214	0.963781	6.60254	0.0333497	0.5157
FBgn0031702	-0.60344	5.38299	6.60457	0.0333517	0.5157
FBgn0083027	0.788815	5.96676	6.68291	0.0334393	0.516014
FBgn0031860	-0.448771	5.32506	6.58562	0.0335204	0.516014
FBgn0039505	-0.24906	3.12389	6.58513	0.0335253	0.516014
FBgn0029769	0.767552	2.34439	6.57746	0.0336031	0.516424
FBgn0039977	-0.164262	5.22609	6.56017	0.0337793	0.51741
FBgn0017558	0.450562	6.34288	6.55672	0.0338146	0.51741
FBgn0083049	0.459376	1.52469	6.55255	0.0338573	0.51741
FBgn0035110	-0.203069	3.98442	6.54324	0.033953	0.51741
FBgn0011016	-0.24154	8.76621	6.542	0.0339658	0.51741
FBgn0034761	-0.586882	2.46634	6.53785	0.0340085	0.51741
FBgn0035245	0.584756	0.670113	6.53616	0.034026	0.51741
FBgn0040238	0.322607	5.38202	6.50354	0.0343647	0.520516
FBgn0037678	0.345999	7.35612	6.49894	0.0344128	0.520516
FBgn0052091	1.26248	3.27543	6.67654	0.0344156	0.520516
FBgn0029763	-0.184294	5.93432	6.49114	0.0344946	0.520516
FBgn0038043	-0.192403	3.77862	6.4868	0.0345403	0.520516
FBgn0035147	0.201284	7.49776	6.48246	0.0345859	0.520516
FBgn0036489	-0.224838	4.40438	6.4807	0.0346044	0.520516
FBgn0264707	0.166602	4.64572	6.47386	0.0346767	0.520516
FBgn0043362	0.260334	4.68566	6.47128	0.034704	0.520516
FBgn0041181	0.350248	6.69174	6.46733	0.0347458	0.520516
FBgn0033710	0.537431	0.749061	6.44024	0.0350344	0.524063
FBgn0030600	0.295754	4.1598	6.42289	0.0352209	0.526072
FBgn0034177	0.176913	3.68886	6.40325	0.0354334	0.528111
FBgn0038873	-0.848616	3.12774	6.45656	0.035462	0.528111
FBgn0264775	-0.357795	3.78309	6.37879	0.0357005	0.530366
FBgn0036272	-0.405774	6.38742	6.37715	0.0357185	0.530366
FBgn0038463	-0.178862	6.22646	6.33116	0.0362278	0.537139
FBgn0015279	0.202334	5.67476	6.3257	0.0362889	0.537232
FBgn0036410	0.7345	2.14962	6.31564	0.0364018	0.537232
FBgn0039702	0.269878	2.0974	6.29623	0.0366208	0.537232
FBgn0033224	0.445736	6.87242	6.29096	0.0366806	0.537232
FBgn0032400	1.04005	9.12064	6.46414	0.0366811	0.537232
FBgn0034470	1.15718	8.78283	6.46833	0.0368055	0.537232
FBgn0035049	0.620812	5.51047	6.30209	0.0368115	0.537232
FBgn0037697	0.632881	5.47122	6.30376	0.0368755	0.537232
FBgn0259998	0.562093	9.19459	6.25919	0.0370457	0.537232
FBgn0037012	0.501513	4.092	6.25625	0.0370774	0.537232
FBgn0038475	0.194632	4.10356	6.25458	0.0370966	0.537232
FBgn0259175	-0.342639	7.71477	6.24918	0.0371588	0.537232
FBgn0030964	0.38563	2.46186	6.24805	0.0371719	0.537232
FBgn0261090	0.431027	1.78472	6.24679	0.0371866	0.537232
FBgn0065064	1.03622	7.94767	6.39121	0.0372327	0.537232
FBgn0039752	0.808384	0.464756	6.24147	0.0372481	0.537232
FBgn0022349	-0.360881	5.82402	6.24118	0.0372514	0.537232
FBgn0039453	0.465567	6.92555	6.2381	0.037287	0.537232
FBgn0265266	1.91907	0.448497	6.31303	0.0373084	0.537232
FBgn0042138	-0.170849	6.92414	6.23549	0.0373173	0.537232
FBgn0045852	-0.357962	4.36431	6.22676	0.0374188	0.537232
FBgn0261882	-0.251121	2.61073	6.21032	0.0376109	0.537232
FBgn0000527	1.76951	4.44883	6.41772	0.0376318	0.537232
FBgn0265003	0.182373	5.31715	6.19876	0.0377467	0.537232
FBgn0039239	1.34318	6.3764	6.39551	0.0378793	0.537232
FBgn0030347	0.303823	3.85719	6.18567	0.0379013	0.537232
FBgn0039258	-0.214532	2.87475	6.18165	0.0379489	0.537232
FBgn0000337	0.312837	2.30019	6.17983	0.0379704	0.537232
FBgn0030970	-0.247934	3.23906	6.16542	0.0381419	0.537232
FBgn0016650	0.251911	3.81902	6.16384	0.0381608	0.537232
FBgn0028969	-0.195851	7.10567	6.16309	0.0381697	0.537232
FBgn0032849	-0.19904	5.03302	6.15954	0.0382122	0.537232
FBgn0029665	-0.254295	5.21804	6.15755	0.038236	0.537232
FBgn0262886	-0.318006	1.75307	6.15107	0.0383135	0.537232
FBgn0033691	-0.26076	6.03059	6.14928	0.0383351	0.537232
FBgn0036302	0.162073	4.44646	6.14482	0.0383887	0.537232
FBgn0035666	0.718666	9.28414	6.21076	0.0384584	0.537232
FBgn0036732	-0.671033	5.76318	6.19011	0.0385	0.537232
FBgn0025185	0.353288	1.72513	6.13546	0.0385015	0.537232
FBgn0029913	0.370069	1.90631	6.13477	0.0385099	0.537232
FBgn0060296	0.191536	4.86213	6.13156	0.0385487	0.537232
FBgn0051262	0.75487	3.57541	6.17821	0.0386075	0.537232
FBgn0027790	0.412218	4.79337	6.1216	0.0386694	0.537232
FBgn0029976	0.176107	3.77442	6.11339	0.0387692	0.537232
FBgn0036111	-0.256437	6.36755	6.10656	0.0388525	0.537232
FBgn0035868	-0.367029	2.02274	6.10372	0.0388873	0.537232
FBgn0261089	0.416065	1.83748	6.10203	0.0389078	0.537232
FBgn0034542	0.190153	5.17973	6.09724	0.0389666	0.537232
FBgn0037078	1.46279	4.76638	6.29759	0.0389954	0.537232
FBgn0035830	-0.171336	4.8162	6.09373	0.0390096	0.537232
FBgn0261279	-0.185568	6.19134	6.09035	0.0390512	0.537232
FBgn0034275	-0.18792	5.91437	6.06918	0.0393126	0.537232
FBgn0039864	-0.478217	0.240611	6.06871	0.0393184	0.537232
FBgn0036877	-0.372771	2.22493	6.06807	0.0393264	0.537232
FBgn0051427	-0.840582	0.872154	6.06383	0.039379	0.537232
FBgn0033268	0.326802	6.42487	6.0583	0.0394478	0.537232
FBgn0038214	-0.351295	4.16872	6.05538	0.0394842	0.537232
FBgn0034629	-0.183523	6.24968	6.05494	0.0394897	0.537232
FBgn0013751	0.301098	1.83368	6.0472	0.0395863	0.537232
FBgn0263852	-0.18137	5.75066	6.04477	0.0396167	0.537232
FBgn0031636	0.379952	3.23036	6.04372	0.0396298	0.537232
FBgn0034392	0.267016	3.79948	6.03697	0.0397145	0.537232
FBgn0264987	1.34	4.19774	6.23598	0.0397196	0.537232
FBgn0035262	0.254818	2.14675	6.03033	0.0397981	0.537232
FBgn0030208	-0.234671	5.11201	6.02753	0.0398333	0.537232
FBgn0027518	0.189597	3.30553	6.02629	0.039849	0.537232
FBgn0028421	0.223899	4.08475	6.02482	0.0398676	0.537232
FBgn0030675	0.321111	2.12223	6.0216	0.0399082	0.537232
FBgn0030802	-0.148839	5.67012	6.01885	0.039943	0.537232
FBgn0038646	-0.20719	4.8276	6.01762	0.0399585	0.537232
FBgn0038528	2.61117	6.3001	6.20485	0.0400921	0.538311
FBgn0015239	0.185385	5.72702	5.98817	0.0403336	0.538912
FBgn0022702	0.542106	4.58596	5.97876	0.0404544	0.538912
FBgn0083015	0.550034	4.36731	5.97762	0.0404691	0.538912
FBgn0030512	-0.315262	5.33036	5.97664	0.0404818	0.538912
FBgn0030291	-0.354484	2.07499	5.97556	0.0404956	0.538912
FBgn0263390	0.449986	5.33357	5.97278	0.0405315	0.538912
FBgn0027348	-0.210073	8.70839	5.96783	0.0405953	0.538912
FBgn0037703	0.164	3.59548	5.96742	0.0406005	0.538912
FBgn0019952	-0.382367	5.39887	5.96614	0.0406172	0.538912
FBgn0004910	-0.197853	6.05649	5.95896	0.0407101	0.539435
FBgn0019948	0.32432	5.08263	5.95395	0.0407751	0.539588
FBgn0037644	-0.186462	4.24186	5.94679	0.0408683	0.540114
FBgn0003149	0.289779	10.7094	5.93434	0.0410309	0.541109
FBgn0082957	0.666503	1.99135	5.93282	0.0410508	0.541109
FBgn0037301	-0.19195	5.49499	5.91883	0.0412346	0.542251
FBgn0259164	1.86537	2.85109	6.11083	0.0412448	0.542251
FBgn0051041	0.544716	4.65014	5.91016	0.041349	0.542914
FBgn0036662	-0.195362	5.70864	5.8977	0.0415143	0.544376
FBgn0053966	-0.160813	5.13456	5.89192	0.0415911	0.544676
FBgn0031043	-0.235031	4.48586	5.87981	0.0417528	0.54579
FBgn0036813	-0.177976	4.37691	5.87383	0.041833	0.54579
FBgn0041094	0.216008	7.36003	5.87297	0.0418446	0.54579
FBgn0036987	0.224931	2.6818	5.86941	0.0418924	0.54579
FBgn0033117	-0.1638	3.61008	5.85574	0.0420767	0.546109
FBgn0002948	0.39222	0.973582	5.85249	0.0421207	0.546109
FBgn0034008	0.276395	2.34657	5.85137	0.0421359	0.546109
FBgn0039787	0.340992	4.50549	5.84505	0.0422216	0.546109
FBgn0037020	-0.134185	5.58824	5.83103	0.0424126	0.546109
FBgn0261504	1.60725	6.24007	6.01748	0.0424323	0.546109
FBgn0030310	0.367992	3.53681	5.82796	0.0424545	0.546109
FBgn0036980	0.270745	4.17745	5.82625	0.0424778	0.546109
FBgn0013269	-0.457812	6.73478	5.82599	0.0424813	0.546109
FBgn0032213	0.358702	6.74701	5.82046	0.0425572	0.546109
FBgn0262699	0.222357	4.65252	5.81568	0.0426228	0.546109
FBgn0051792	-0.347766	5.99761	5.81506	0.0426313	0.546109
FBgn0082998	-0.730273	0.18644	5.81157	0.0426793	0.546109
FBgn0035587	0.325695	4.61903	5.81008	0.0426998	0.546109
FBgn0266464	-0.290806	5.75621	5.80803	0.0427282	0.546109
FBgn0038080	-0.166604	4.83468	5.79401	0.042922	0.547634
FBgn0039774	-0.365039	6.10084	5.78945	0.0429852	0.547634
FBgn0261241	-0.163128	5.0544	5.77793	0.0431457	0.547634
FBgn0051019	1.01838	0.541911	5.77712	0.0431571	0.547634
FBgn0029810	0.312831	2.68021	5.77646	0.0431663	0.547634
FBgn0034784	-0.259149	4.25022	5.77523	0.0431835	0.547634
FBgn0052333	0.32405	3.88633	5.77211	0.0432271	0.547634
FBgn0028871	0.415813	5.75407	5.75414	0.0434795	0.549884
FBgn0086611	0.869711	10.1909	5.88659	0.0435726	0.549884
FBgn0035976	0.243836	4.96847	5.74394	0.0436236	0.549884
FBgn0032194	-0.132565	4.7756	5.74347	0.0436302	0.549884
FBgn0041712	0.443676	4.88267	5.7396	0.0436851	0.549884
FBgn0035490	0.405394	4.90502	5.73527	0.0437465	0.549884
FBgn0033730	1.04796	6.71285	5.87622	0.0438164	0.549884
FBgn0261674	-0.174816	5.38038	5.72867	0.0438404	0.549884
FBgn0083040	0.625235	6.51982	5.73331	0.0441514	0.552037
FBgn0039631	0.304764	1.91762	5.70127	0.044233	0.552037
FBgn0039161	0.89497	2.82014	5.75346	0.0442607	0.552037
FBgn0037922	0.188548	2.97309	5.697	0.0442946	0.552037
FBgn0046880	0.456916	1.9746	5.69611	0.0443075	0.552037
FBgn0036927	-0.397122	7.70126	5.69385	0.0443401	0.552037
FBgn0038649	-0.21658	5.2054	5.67368	0.0446329	0.552919
FBgn0022700	0.983473	4.8651	5.80394	0.0447379	0.552919
FBgn0053503	0.746727	4.02744	5.72487	0.0447538	0.552919
FBgn0002868	-1.1517	5.0388	5.83109	0.0447931	0.552919
FBgn0035947	-0.317931	6.94404	5.66263	0.0447943	0.552919
FBgn0031735	1.45254	1.9453	5.77166	0.0448162	0.552919
FBgn0261953	0.929416	0.613196	5.65688	0.0448787	0.552919
FBgn0065100	1.2965	3.77764	5.83083	0.0448952	0.552919
FBgn0031800	0.552219	0.514542	5.65407	0.0449199	0.552919
FBgn0027088	-0.216239	6.86965	5.65144	0.0449585	0.552919
FBgn0010042	0.858575	0.845231	5.64625	0.0450351	0.553186
FBgn0083047	0.708704	4.16591	5.69147	0.0451666	0.553657
FBgn0002973	0.193937	5.42177	5.63623	0.0451831	0.553657
FBgn0020637	0.599925	9.81858	5.66182	0.0454865	0.55527
FBgn0039006	0.444449	5.07274	5.60806	0.0456026	0.55527
FBgn0046879	0.351079	1.55833	5.60641	0.0456274	0.55527
FBgn0035165	-0.203847	6.96096	5.60607	0.0456324	0.55527
FBgn0037960	0.547988	2.87332	5.60111	0.0457069	0.55527
FBgn0029720	0.417995	4.28229	5.59457	0.0458053	0.55527
FBgn0262679	0.362164	1.29978	5.59223	0.0458406	0.55527
FBgn0015541	0.279313	6.24219	5.59077	0.0458625	0.55527
FBgn0035476	0.470565	1.58609	5.59034	0.045869	0.55527
FBgn0027291	-0.186187	8.96972	5.58884	0.0458917	0.55527
FBgn0259678	0.163983	5.47117	5.58699	0.0459196	0.55527
FBgn0031188	-0.203263	4.48514	5.55337	0.0464315	0.557868
FBgn0036566	-0.228334	6.22536	5.54586	0.0465467	0.557868
FBgn0024183	-0.277927	8.2314	5.54359	0.0465817	0.557868
FBgn0015218	-0.200082	7.68711	5.53999	0.0466372	0.557868
FBgn0032341	-0.226222	5.46859	5.53881	0.0466553	0.557868
FBgn0037973	0.317248	6.73604	5.53746	0.0466761	0.557868
FBgn0038275	-0.343347	3.12931	5.53656	0.0466901	0.557868
FBgn0045823	-0.180526	6.21103	5.53557	0.0467053	0.557868
FBgn0039589	-0.220723	2.96176	5.52773	0.0468266	0.557868
FBgn0034583	0.254057	8.07711	5.52678	0.0468414	0.557868
FBgn0011745	-0.144836	6.4277	5.52549	0.0468614	0.557868
FBgn0033246	-0.196127	10.8709	5.52101	0.046931	0.557868
FBgn0036191	-0.168767	4.45657	5.51882	0.0469649	0.557868
FBgn0261239	0.426607	5.40252	5.51035	0.047097	0.557868
FBgn0086768	0.409078	3.99857	5.50942	0.0471115	0.557868
FBgn0263133	-0.22307	6.7335	5.50848	0.0471261	0.557868
FBgn0013263	-0.369901	4.15236	5.50743	0.0471426	0.557868
FBgn0036897	0.284002	3.76236	5.50425	0.0471923	0.557868
FBgn0034001	-0.192453	4.3248	5.49936	0.0472689	0.557868
FBgn0026190	0.844303	3.42756	5.56553	0.047269	0.557868
FBgn0263745	0.368286	1.20003	5.49481	0.0473404	0.557868
FBgn0010434	0.146447	7.97327	5.49312	0.047367	0.557868
FBgn0001942	0.140493	10.4469	5.48963	0.0474218	0.557868
FBgn0032130	0.261958	4.26467	5.48717	0.0474605	0.557868
FBgn0052278	-0.165023	4.92485	5.48351	0.0475183	0.557898
FBgn0025739	0.371406	1.58262	5.47351	0.0476765	0.559106
FBgn0000996	-0.253404	4.00248	5.46842	0.0477574	0.559404
FBgn0036837	0.383376	7.80635	5.4614	0.0478691	0.560063
FBgn0053523	-0.162997	6.88741	5.45439	0.047981	0.560722
FBgn0026679	-0.214039	3.959	5.44999	0.0480514	0.560896
FBgn0004885	0.434742	5.59449	5.44313	0.0481614	0.56153
FBgn0031562	1.62202	6.65884	5.60339	0.048267	0.562113
FBgn0052452	-0.511972	2.02582	5.42006	0.0485339	0.562212
FBgn0031190	1.27074	7.5505	5.58504	0.0485488	0.562212
FBgn0036824	-0.354944	8.01868	5.41338	0.0486422	0.562212
FBgn0016685	-0.286157	7.21344	5.41204	0.0486642	0.562212
FBgn0261682	0.296493	3.57762	5.41144	0.0486738	0.562212
FBgn0043900	-0.248405	3.60402	5.40714	0.048744	0.562212
FBgn0052707	-0.222659	2.88458	5.40566	0.0487681	0.562212
FBgn0053113	-0.21974	9.74122	5.40461	0.0487852	0.562212
FBgn0037440	-0.179998	7.02916	5.39864	0.0488828	0.562212
FBgn0051229	-0.219677	5.09004	5.39864	0.0488829	0.562212
FBgn0037724	0.456037	9.86867	5.39833	0.048888	0.562212
FBgn0015576	0.520625	4.71934	5.39377	0.0489627	0.56243
FBgn0035589	0.219075	3.6304	5.38775	0.0490615	0.562925
FBgn0013953	0.699426	5.35747	5.44008	0.0491449	0.563082
FBgn0028550	0.430191	4.84833	5.38006	0.0491882	0.563082
FBgn0027090	-0.184281	6.41035	5.37401	0.0492883	0.563082
FBgn0032897	0.615627	5.17003	5.40592	0.0493192	0.563082
FBgn0038658	0.499522	4.4732	5.35833	0.0495485	0.563082
FBgn0032168	-0.194523	3.85226	5.35657	0.0495778	0.563082
FBgn0036986	-0.338948	0.981983	5.35571	0.0495921	0.563082
FBgn0025186	0.329504	3.38766	5.35449	0.0496125	0.563082
FBgn0034475	0.556496	3.42081	5.35441	0.0496138	0.563082
FBgn0028582	0.182112	6.38913	5.35096	0.0496714	0.563082
FBgn0261710	-0.349406	6.3596	5.34838	0.0497145	0.563082
FBgn0031547	-0.359491	2.70403	5.3466	0.0497444	0.563082
FBgn0040799	0.887377	4.619	5.44422	0.0498751	0.563709
FBgn0005694	-0.426875	4.60437	5.33664	0.0499115	0.563709
FBgn0016041	-0.249205	7.53572	5.3265	0.0500823	0.564856
FBgn0030037	-0.267035	4.53068	5.32398	0.0501248	0.564856
FBgn0044324	-0.234919	6.13029	5.3119	0.0503296	0.566531
FBgn0000422	0.836449	5.96093	5.40187	0.0504451	0.566845
FBgn0033574	0.672617	2.74766	5.30366	0.0504698	0.566845
FBgn0037248	-0.33928	5.89044	5.29697	0.0505842	0.567498
FBgn0032910	1.50695	7.4747	5.43962	0.0508606	0.567687
FBgn0039427	-0.147453	4.56927	5.27815	0.0509074	0.567687
FBgn0086711	1.0198	4.48618	5.40799	0.0509276	0.567687
FBgn0004050	-0.174657	3.99268	5.27695	0.050928	0.567687
FBgn0033853	0.337991	5.51739	5.27606	0.0509432	0.567687
FBgn0260484	-0.307828	4.8421	5.2686	0.0510723	0.567687
FBgn0032859	-0.220264	6.61635	5.26733	0.0510943	0.567687
FBgn0010774	-0.291357	6.3899	5.26611	0.0511155	0.567687
FBgn0262743	-0.225458	7.44145	5.26597	0.0511178	0.567687
FBgn0020415	0.430827	7.9333	5.26335	0.0511633	0.567687
FBgn0025626	-0.161051	4.34697	5.25368	0.0513314	0.567955
FBgn0015577	0.336179	6.61294	5.25312	0.0513412	0.567955
FBgn0033787	0.330701	8.60302	5.25226	0.0513562	0.567955
FBgn0001105	-0.189089	7.93227	5.24573	0.0514702	0.56824
FBgn0035968	0.344576	6.38623	5.24408	0.051499	0.56824
FBgn0034985	0.231686	5.90434	5.24004	0.0515698	0.56824
FBgn0036638	1.2532	5.03814	5.39449	0.051607	0.56824
FBgn0039829	-0.41675	2.04284	5.23039	0.0517393	0.569076
FBgn0037156	-0.255776	3.16195	5.22673	0.0518038	0.569165
FBgn0033304	0.317157	2.91035	5.22115	0.0519023	0.569258
FBgn0004103	-0.204868	7.14579	5.21987	0.051925	0.569258
FBgn0030836	0.508748	6.77985	5.20666	0.0521592	0.570065
FBgn0267795	0.47614	5.78716	5.20647	0.0521626	0.570065
FBgn0030628	-0.27292	1.92229	5.20562	0.0521776	0.570065
FBgn0035440	-0.140979	4.07666	5.19901	0.0522954	0.570065
FBgn0262394	0.601718	1.40716	5.19611	0.0523472	0.570065
FBgn0036950	0.403425	5.09976	5.18974	0.0524612	0.570065
FBgn0260440	0.469256	2.24111	5.17978	0.0526401	0.570065
FBgn0036605	1.02231	4.98203	5.30839	0.0526582	0.570065
FBgn0030217	-0.33566	2.95699	5.17855	0.0526622	0.570065
FBgn0265998	0.205128	6.86568	5.17803	0.0526715	0.570065
FBgn0028491	-0.227772	8.40295	5.17095	0.0527992	0.570065
FBgn0023167	-0.448644	3.43059	5.16897	0.0528351	0.570065
FBgn0266376	-0.376792	1.84055	5.16765	0.052859	0.570065
FBgn0031952	0.191187	4.65002	5.16653	0.0528791	0.570065
FBgn0039711	0.285735	2.3108	5.16062	0.0529864	0.570065
FBgn0266518	-0.214725	3.83246	5.159	0.0530157	0.570065
FBgn0013954	-0.13742	8.54918	5.15617	0.0530671	0.570065
FBgn0263118	0.377185	3.98364	5.15472	0.0530936	0.570065
FBgn0024989	-0.915473	8.93255	5.26971	0.0531599	0.570065
FBgn0263398	0.159513	4.85427	5.14947	0.0531892	0.570065
FBgn0039022	-0.253206	3.64084	5.14718	0.0532309	0.570065
FBgn0028399	0.255893	5.79997	5.1445	0.0532799	0.570065
FBgn0263396	-0.280928	9.15601	5.14118	0.0533406	0.570065
FBgn0035909	-0.217567	8.5189	5.1348	0.0534576	0.570065
FBgn0032465	-0.138502	5.37115	5.1319	0.0535109	0.570065
FBgn0033382	-0.316814	4.40613	5.12427	0.0536513	0.570065
FBgn0053051	-0.291347	2.41021	5.12359	0.0536639	0.570065
FBgn0028940	1.04474	6.18151	5.25083	0.0537691	0.570065
FBgn0033980	0.597715	4.3252	5.13694	0.0538083	0.570065
FBgn0039441	1.79055	9.94105	5.26531	0.0538236	0.570065
FBgn0052221	0.359643	3.48683	5.11359	0.0538487	0.570065
FBgn0031688	-0.66155	6.7534	5.15816	0.053857	0.570065
FBgn0086663	-0.626957	0.309556	5.11063	0.0539036	0.570065
FBgn0000556	-0.151889	13.5601	5.10937	0.053927	0.570065
FBgn0028990	0.273973	5.76596	5.10499	0.0540083	0.570065
FBgn0036688	0.154873	5.07121	5.10376	0.0540311	0.570065
FBgn0261383	-0.287083	4.64536	5.09838	0.0541313	0.570518
FBgn0001296	0.47256	2.82502	5.09364	0.0542198	0.570518
FBgn0030943	-0.251768	3.85905	5.09014	0.0542854	0.570518
FBgn0023541	0.829566	4.3961	5.16961	0.0543616	0.570518
FBgn0043841	0.628506	7.01979	5.11341	0.0544189	0.570518
FBgn0040349	0.432703	6.71991	5.08188	0.0544403	0.570518
FBgn0267408	0.245458	7.321	5.07853	0.0545033	0.570518
FBgn0035715	0.249618	4.89949	5.07731	0.0545261	0.570518
FBgn0262870	-0.253126	4.98173	5.06965	0.0546707	0.570929
FBgn0037018	-0.170551	4.67723	5.06697	0.0547214	0.570929
FBgn0010282	-0.244635	5.39033	5.06624	0.054735	0.570929
FBgn0010241	1.02197	4.98083	5.17172	0.0550886	0.573232
FBgn0040211	0.561816	4.76475	5.0577	0.0551187	0.573232
FBgn0051357	0.305025	3.19189	5.04382	0.0551614	0.573232
FBgn0026400	-0.187898	4.34423	5.04269	0.0551828	0.573232
FBgn0259139	-0.471203	5.71297	5.03501	0.0553301	0.573625
FBgn0051148	0.371071	4.09017	5.02392	0.0555431	0.573625
FBgn0026879	-0.173103	6.48529	5.02368	0.0555478	0.573625
FBgn0051104	0.544353	4.03821	5.01313	0.0557518	0.573625
FBgn0036046	0.360564	2.19653	5.01105	0.0557921	0.573625
FBgn0031558	0.681463	5.95854	5.06521	0.0557961	0.573625
FBgn0083124	-0.355482	3.55424	5.01032	0.0558061	0.573625
FBgn0032193	0.295971	2.80085	5.00871	0.0558374	0.573625
FBgn0035187	0.337285	1.25932	5.00733	0.0558642	0.573625
FBgn0262794	1.23669	1.94881	5.07415	0.0558668	0.573625
FBgn0050342	-0.193333	3.45707	5.00685	0.0558735	0.573625
FBgn0259236	0.132538	4.24942	5.00536	0.0559025	0.573625
FBgn0036727	0.251852	5.01615	4.99783	0.0560491	0.574545
FBgn0083058	0.457478	7.00918	4.98725	0.0562559	0.576081
FBgn0020238	-0.178998	9.22828	4.984	0.0563195	0.576148
FBgn0029079	-0.2765	3.68024	4.97938	0.0564104	0.57639
FBgn0030060	0.249769	6.31875	4.97689	0.0564593	0.57639
FBgn0034480	0.526398	4.60786	4.97378	0.0565206	0.57639
FBgn0025390	0.559896	2.0513	4.96871	0.0566207	0.57639
FBgn0000099	-0.389425	4.08683	4.9661	0.0566721	0.57639
FBgn0031882	0.241597	3.92874	4.96542	0.0566857	0.57639
FBgn0026630	-0.291494	6.49965	4.95845	0.0568238	0.576623
FBgn0051371	1.73565	2.47597	5.09955	0.0568524	0.576623
FBgn0032202	0.514643	3.45959	4.95253	0.0569414	0.576623
FBgn0030326	1.27794	3.24947	5.08475	0.0569762	0.576623
FBgn0038432	-0.172577	4.44043	4.94988	0.0569941	0.576623
FBgn0086659	0.809696	6.71703	5.01783	0.0571633	0.577405
FBgn0037627	0.450536	1.73041	4.94028	0.0571858	0.577405
FBgn0000592	-0.310205	5.73153	4.93614	0.0572687	0.577665
FBgn0039436	1.34104	9.00566	5.07435	0.0573322	0.577728
FBgn0028648	-0.161023	4.74308	4.92293	0.0575344	0.579187
FBgn0013753	0.15454	2.8897	4.91849	0.057624	0.579512
FBgn0086448	0.297513	2.47466	4.91527	0.0576891	0.579589
FBgn0033115	0.631532	1.95434	4.91185	0.0577583	0.579707
FBgn0027872	-0.188743	4.01147	4.90882	0.0578197	0.579748
FBgn0026077	-1.41637	8.48345	5.04519	0.0578939	0.579916
FBgn0003464	0.168479	3.68185	4.89253	0.0581516	0.580486
FBgn0031910	0.198796	6.78566	4.88359	0.0583348	0.580486
FBgn0036876	0.583277	4.76143	4.90744	0.0583687	0.580486
FBgn0004169	-0.185144	10.6645	4.88182	0.058371	0.580486
FBgn0035959	-0.168718	4.11008	4.87909	0.0584271	0.580486
FBgn0031696	-0.165189	4.19036	4.87904	0.0584282	0.580486
FBgn0035985	0.96665	6.91587	4.98284	0.0585358	0.580486
FBgn0036953	0.356412	7.2358	4.87272	0.0585583	0.580486
FBgn0037607	-0.199198	10.1507	4.87157	0.0585821	0.580486
FBgn0266346	0.612676	4.22428	4.90047	0.0585879	0.580486
FBgn0039126	-0.149518	4.65649	4.87096	0.0585946	0.580486
FBgn0033159	0.333073	5.04063	4.85881	0.0588462	0.580486
FBgn0053128	0.404585	8.62767	4.8576	0.0588712	0.580486
FBgn0032763	0.277984	1.58799	4.85522	0.0589207	0.580486
FBgn0014163	-0.325895	5.90423	4.85458	0.058934	0.580486
FBgn0035986	-0.269931	2.82878	4.85443	0.0589371	0.580486
FBgn0043455	-0.215391	3.54237	4.85256	0.0589761	0.580486
FBgn0032779	0.167973	5.96594	4.8521	0.0589857	0.580486
FBgn0032231	0.305973	3.6161	4.84865	0.0590575	0.580577
FBgn0034242	-0.213936	4.44283	4.8452	0.0591295	0.580577
FBgn0035753	0.157347	9.51097	4.84338	0.0591675	0.580577
FBgn0031777	-0.2251	2.95804	4.84041	0.0592296	0.580623
FBgn0031392	-0.232567	6.70834	4.83207	0.0594045	0.581355
FBgn0083121	-0.569879	0.959071	4.83112	0.0594245	0.581355
FBgn0036271	-0.156642	5.70173	4.82862	0.059477	0.581355
FBgn0016920	0.238145	3.14733	4.8218	0.0596209	0.582197
FBgn0036691	-0.144003	4.15802	4.81153	0.0598381	0.582916
FBgn0038070	-1.13805	2.47928	4.8842	0.0599243	0.582916
FBgn0028406	0.342197	2.48139	4.79525	0.0601846	0.582916
FBgn0033582	0.30361	4.51822	4.79191	0.060256	0.582916
FBgn0004919	0.769829	4.77329	4.85865	0.0602753	0.582916
FBgn0035553	1.12448	2.23372	4.85142	0.0603113	0.582916
FBgn0052251	-0.337986	2.78983	4.78867	0.0603254	0.582916
FBgn0015903	0.320843	4.3382	4.78673	0.0603669	0.582916
FBgn0002174	-0.183092	5.91413	4.78597	0.0603833	0.582916
FBgn0037796	0.280929	5.61412	4.77569	0.0606043	0.582916
FBgn0031307	-0.301694	7.10352	4.77447	0.0606306	0.582916
FBgn0036039	-0.20208	4.05236	4.76945	0.0607389	0.582916
FBgn0036402	-0.163052	3.6556	4.7686	0.0607573	0.582916
FBgn0036501	0.393066	5.69416	4.76655	0.0608018	0.582916
FBgn0043010	-0.170776	4.10932	4.76649	0.060803	0.582916
FBgn0010223	0.261687	4.41403	4.76309	0.0608767	0.582916
FBgn0032029	-0.215656	6.09737	4.75004	0.0611605	0.582916
FBgn0031607	0.19637	3.40933	4.74855	0.061193	0.582916
FBgn0083014	0.898788	3.08039	4.80467	0.0612473	0.582916
FBgn0034897	-0.36333	6.309	4.74282	0.0613181	0.582916
FBgn0010877	0.172708	4.93753	4.73998	0.0613804	0.582916
FBgn0000078	1.3225	2.9133	4.85653	0.0613923	0.582916
FBgn0030494	0.456298	1.02052	4.73925	0.0613963	0.582916
FBgn0033541	0.250968	8.65657	4.7379	0.0614259	0.582916
FBgn0030558	0.629885	5.88937	4.78087	0.0614467	0.582916
FBgn0038686	0.173658	4.29291	4.73325	0.0615279	0.582916
FBgn0028717	0.184857	4.52201	4.73316	0.0615299	0.582916
FBgn0010421	-0.241909	3.27997	4.73308	0.0615318	0.582916
FBgn0001220	-0.194006	9.42124	4.73111	0.061575	0.582916
FBgn0038632	0.344344	2.51927	4.7308	0.0615818	0.582916
FBgn0046685	0.376682	3.38537	4.72626	0.0616819	0.582916
FBgn0038316	0.168329	3.45488	4.72424	0.0617264	0.582916
FBgn0260456	-0.309395	4.6012	4.72195	0.061777	0.582916
FBgn0262468	-0.232749	6.71476	4.72171	0.0617823	0.582916
FBgn0033122	0.21546	3.04122	4.71883	0.0618461	0.582916
FBgn0034543	-0.252518	4.53672	4.71101	0.0620192	0.582916
FBgn0086917	-0.396687	1.92796	4.70918	0.06206	0.582916
FBgn0035438	0.277617	7.18222	4.70881	0.0620681	0.582916
FBgn0019890	0.288944	6.08982	4.70842	0.0620768	0.582916
FBgn0031662	-0.156259	6.98148	4.70317	0.0621937	0.582916
FBgn0026259	-0.323463	7.25705	4.69915	0.0622833	0.582916
FBgn0083016	0.492603	0.409673	4.69892	0.0622884	0.582916
FBgn0261635	2.18865	3.12089	4.82807	0.0623099	0.582916
FBgn0038337	0.654958	5.5214	4.73212	0.0626038	0.582916
FBgn0086665	0.327413	3.08676	4.67842	0.0627484	0.582916
FBgn0051320	-0.188548	2.75092	4.67608	0.0628012	0.582916
FBgn0025625	0.317968	1.98865	4.67135	0.0629079	0.582916
FBgn0035547	-2.06685	3.8721	4.79642	0.0629898	0.582916
FBgn0038072	0.252633	4.79825	4.66717	0.0630025	0.582916
FBgn0051460	-0.32391	2.32149	4.66156	0.0631298	0.582916
FBgn0035360	-0.132378	5.35505	4.66104	0.0631417	0.582916
FBgn0034802	-0.536391	7.86368	4.661	0.0631574	0.582916
FBgn0024510	0.204965	4.49805	4.65805	0.0632096	0.582916
FBgn0037562	0.459223	2.26946	4.65743	0.0632237	0.582916
FBgn0039326	0.711224	5.66785	4.70649	0.0634108	0.582916
FBgn0261380	-0.198458	5.73733	4.64872	0.0634224	0.582916
FBgn0052831	0.189848	2.38089	4.64789	0.0634413	0.582916
FBgn0260859	0.16695	3.58774	4.64372	0.0635367	0.582916
FBgn0020443	-0.299184	8.40114	4.64311	0.0635506	0.582916
FBgn0263602	0.227166	2.74958	4.6423	0.0635691	0.582916
FBgn0038421	-0.372142	1.90302	4.63488	0.0637396	0.582916
FBgn0030777	0.556057	5.18991	4.65433	0.0637734	0.582916
FBgn0039385	-0.225612	2.72683	4.62793	0.0638997	0.582916
FBgn0029526	0.600126	0.54168	4.62602	0.0639437	0.582916
FBgn0259748	0.793462	2.03748	4.626	0.0639442	0.582916
FBgn0030956	-0.266827	3.54994	4.62574	0.0639501	0.582916
FBgn0028487	0.186184	3.70038	4.62426	0.0639844	0.582916
FBgn0039538	0.428216	3.78597	4.62335	0.0640054	0.582916
FBgn0038547	0.252889	1.63727	4.6224	0.0640275	0.582916
FBgn0033973	0.266177	2.66341	4.62239	0.0640277	0.582916
FBgn0033970	0.798377	4.36563	4.68639	0.0642082	0.582916
FBgn0036993	0.362109	3.22312	4.61442	0.0642122	0.582916
FBgn0037750	0.21015	4.80708	4.61413	0.0642191	0.582916
FBgn0024326	-0.171668	5.9388	4.61273	0.0642516	0.582916
FBgn0040099	0.986063	0.19076	4.61257	0.0642553	0.582916
FBgn0002021	-0.144209	5.65915	4.60907	0.0643366	0.582916
FBgn0050489	0.802331	3.46959	4.66184	0.064405	0.582916
FBgn0036514	-0.374936	4.0108	4.60335	0.0644699	0.582916
FBgn0032030	0.163473	3.85714	4.60187	0.0645046	0.582916
FBgn0260954	-0.553179	6.03157	4.62281	0.064554	0.582916
FBgn0013750	-0.212363	6.17065	4.59855	0.0645822	0.582916
FBgn0027525	0.263014	6.1424	4.59625	0.0646359	0.582916
FBgn0035425	0.155597	4.74937	4.59286	0.0647154	0.582916
FBgn0052448	-0.231956	3.82879	4.59125	0.0647532	0.582916
FBgn0029990	0.485728	8.376	4.58249	0.0649592	0.582916
FBgn0030757	0.354555	2.10002	4.58137	0.0649855	0.582916
FBgn0034269	-0.151697	4.54742	4.5813	0.0649871	0.582916
FBgn0033187	-0.166	4.56068	4.57734	0.0650806	0.582916
FBgn0263468	0.717571	3.41797	4.61584	0.0650993	0.582916
FBgn0033388	0.480787	0.903646	4.57638	0.0651033	0.582916
FBgn0036569	-0.26763	4.26599	4.57628	0.0651057	0.582916
FBgn0039419	0.214842	5.01996	4.57396	0.0651606	0.582916
FBgn0039209	0.311916	5.89698	4.57072	0.0652373	0.582916
FBgn0031143	-0.23374	7.20298	4.5703	0.0652471	0.582916
FBgn0039807	0.582574	3.76183	4.58175	0.0652688	0.582916
FBgn0028855	0.474665	8.12976	4.56821	0.0652968	0.582916
FBgn0005777	-0.192439	5.21703	4.56754	0.0653125	0.582916
FBgn0028533	0.353074	8.77424	4.56587	0.0653522	0.582916
FBgn0036225	0.417442	6.44211	4.56231	0.0654368	0.583033
FBgn0086662	0.781178	1.77645	4.55898	0.065516	0.583033
FBgn0264087	0.203826	2.87132	4.55592	0.065589	0.583033
FBgn0034918	-0.239166	2.75325	4.55423	0.0656295	0.583033
FBgn0027066	-0.162271	7.1091	4.55155	0.0656934	0.583033
FBgn0039296	0.197778	3.83205	4.54804	0.0657774	0.583033
FBgn0030007	-0.187346	6.48495	4.53984	0.0659743	0.583033
FBgn0032391	0.239679	1.31824	4.69959	0.0660038	0.583033
FBgn0034137	-0.186949	3.55576	4.53837	0.0660095	0.583033
FBgn0030974	-0.30568	4.2652	4.53795	0.0660197	0.583033
FBgn0032282	0.407927	9.42063	4.53779	0.0660235	0.583033
FBgn0065058	1.11189	0.523339	4.53635	0.0660582	0.583033
FBgn0030006	0.334611	2.27214	4.53287	0.066142	0.583262
FBgn0031945	0.399571	3.1177	4.52289	0.0663833	0.583796
FBgn0037684	-0.276051	5.44463	4.5228	0.0663855	0.583796
FBgn0025684	-0.157241	5.28218	4.51935	0.066469	0.583796
FBgn0028920	0.392906	8.66471	4.51032	0.0666886	0.583796
FBgn0010803	-0.239231	5.695	4.50941	0.0667109	0.583796
FBgn0029860	0.255034	2.70901	4.50837	0.0667362	0.583796
FBgn0033494	-0.210151	4.83193	4.50689	0.0667724	0.583796
FBgn0040732	0.335266	6.37736	4.50312	0.0668644	0.583796
FBgn0030234	-0.144874	6.4132	4.503	0.0668675	0.583796
FBgn0031895	-0.275914	2.13081	4.50205	0.0668907	0.583796
FBgn0260960	-0.41254	8.17093	4.50155	0.0669028	0.583796
FBgn0085432	0.15724	5.96719	4.50125	0.0669102	0.583796
FBgn0035788	0.891591	7.19081	4.5867	0.0669542	0.583796
FBgn0034804	-0.483052	1.65287	4.48861	0.0672206	0.585613
FBgn0033062	-0.321005	6.00499	4.47142	0.0676454	0.588807
FBgn0086668	0.531273	2.73154	4.46507	0.0678033	0.589518
FBgn0036606	1.01814	3.06785	4.54467	0.0678439	0.589518
FBgn0022343	-0.171139	6.74032	4.45656	0.0680158	0.590103
FBgn0053127	0.379825	7.04201	4.45286	0.0681082	0.590103
FBgn0032596	-0.178248	6.36343	4.45259	0.0681151	0.590103
FBgn0039078	0.422762	3.3674	4.44998	0.0681804	0.590103
FBgn0028327	-0.394195	8.67775	4.44906	0.0682034	0.590103
FBgn0263241	0.287081	4.7362	4.44281	0.0683605	0.590955
FBgn0031450	0.197503	4.17815	4.43658	0.0685175	0.591375
FBgn0263999	-0.338607	5.12939	4.43149	0.0686461	0.591375
FBgn0035311	-0.593401	0.773918	4.4289	0.0687117	0.591375
FBgn0034046	-0.217145	2.49654	4.42307	0.0688596	0.591375
FBgn0037003	0.348793	0.267633	5.07367	0.0688746	0.591375
FBgn0038829	-0.126268	6.99071	4.42226	0.0688801	0.591375
FBgn0036853	-0.167232	5.02176	4.41613	0.0690361	0.591375
FBgn0040389	-0.161256	4.97235	4.41565	0.0690483	0.591375
FBgn0011571	-0.282418	5.37944	4.41312	0.0691129	0.591375
FBgn0037131	1.77679	7.89289	4.52814	0.0691609	0.591375
FBgn0038076	-1.08119	3.42216	4.50757	0.0692191	0.591375
FBgn0024991	-0.217253	2.74709	4.40852	0.0692302	0.591375
FBgn0021795	-0.210852	7.93224	4.40709	0.0692669	0.591375
FBgn0038631	0.740633	0.46721	4.40632	0.0692867	0.591375
FBgn0031762	0.198961	2.687	4.40594	0.0692963	0.591375
FBgn0035670	0.337279	9.23948	4.40399	0.0693462	0.591375
FBgn0031260	-0.234495	7.46067	4.39985	0.0694524	0.591781
FBgn0032877	0.295145	1.01909	4.39553	0.0695637	0.591919
FBgn0036754	-0.26719	3.31599	4.39467	0.0695858	0.591919
FBgn0050049	-0.168567	4.4073	4.39223	0.0696485	0.591954
FBgn0266053	-0.268574	5.48236	4.38446	0.0698493	0.592653
FBgn0082997	-0.564351	0.205212	4.38367	0.0698696	0.592653
FBgn0038404	0.232558	2.87403	4.3756	0.0700788	0.592653
FBgn0000667	0.141096	10.2645	4.37482	0.0700991	0.592653
FBgn0037176	0.309772	3.42758	4.37081	0.0702035	0.592653
FBgn0040653	2.67555	1.11948	4.48573	0.0702077	0.592653
FBgn0037515	0.338548	4.84058	4.37015	0.0702206	0.592653
FBgn0263472	0.471397	0.124481	4.36942	0.0702397	0.592653
FBgn0038453	-0.176531	4.29211	4.36867	0.0702591	0.592653
FBgn0032474	0.29258	4.2883	4.36161	0.0704435	0.592967
FBgn0025700	-0.212846	8.09595	4.35729	0.0705566	0.592967
FBgn0037519	-0.345332	0.819651	4.35688	0.0705674	0.592967
FBgn0037182	-0.274831	6.65457	4.35627	0.0705832	0.592967
FBgn0031579	0.254132	5.1222	4.35531	0.0706084	0.592967
FBgn0031635	0.150247	4.13299	4.35334	0.0706601	0.592967
FBgn0000071	0.224697	2.40912	4.35027	0.0707409	0.592967
FBgn0016970	0.334685	1.94488	4.34923	0.0707682	0.592967
FBgn0031534	-0.149479	5.37899	4.34326	0.0709255	0.592967
FBgn0260005	0.325833	3.51283	4.34256	0.0709441	0.592967
FBgn0038437	-0.168343	4.07802	4.34211	0.0709559	0.592967
FBgn0027567	-0.253364	6.01598	4.33931	0.0710297	0.592967
FBgn0263077	0.15843	6.33517	4.33764	0.0710741	0.592967
FBgn0262728	0.192128	3.98634	4.33567	0.0711261	0.592967
FBgn0004957	0.216607	2.58377	4.33374	0.0711771	0.592967
FBgn0004650	-1.80523	1.166	4.41896	0.0713541	0.593211
FBgn0263027	0.478787	0.819728	4.32632	0.0713741	0.593211
FBgn0250835	0.78091	0.449779	4.326	0.0713827	0.593211
FBgn0034279	0.301546	2.22433	4.31722	0.0716168	0.594457
FBgn0041183	-0.47288	3.20375	4.31589	0.0716523	0.594457
FBgn0261794	-0.274102	7.60387	4.31376	0.0717093	0.594457
FBgn0262975	0.153253	7.91612	4.30864	0.0718465	0.595106
FBgn0053267	1.5706	-0.00916399	4.32974	0.0719619	0.595451
FBgn0004854	-0.436575	0.808834	4.3027	0.0720061	0.595451
FBgn0039741	-0.180433	5.25728	4.29541	0.0722025	0.596587
FBgn0015299	-0.180031	4.67445	4.2887	0.0723839	0.59711
FBgn0027587	-0.199036	5.0138	4.28552	0.0724703	0.59711
FBgn0266446	0.195016	8.01979	4.2854	0.0724734	0.59711
FBgn0263864	0.227007	4.6757	4.28219	0.0725606	0.59711
FBgn0038211	1.25867	0.996959	4.31589	0.0726077	0.59711
FBgn0261628	-0.534972	1.46392	4.27817	0.0726698	0.59711
FBgn0086672	0.526545	7.67701	4.2819	0.0726798	0.59711
FBgn0036532	1.01132	7.68511	4.366	0.0729385	0.598041
FBgn0262476	-0.243674	3.03848	4.26738	0.0729644	0.598041
FBgn0010602	-0.139546	5.96525	4.26715	0.0729708	0.598041
FBgn0030066	-0.192577	2.36427	4.26451	0.073043	0.598147
FBgn0039636	0.166148	4.00366	4.26043	0.0731549	0.598228
FBgn0016694	-0.301396	7.23961	4.25983	0.0731714	0.598228
FBgn0032702	0.163885	4.64043	4.25692	0.0732513	0.598397
FBgn0034368	-0.17796	6.7687	4.25137	0.0734041	0.598743
FBgn0028546	0.22327	5.7181	4.24948	0.0734562	0.598743
FBgn0038957	0.975259	0.462047	4.24893	0.0734716	0.598743
FBgn0050496	-0.213054	3.37338	4.24555	0.0735649	0.59902
FBgn0030747	0.151676	6.81362	4.23647	0.0738165	0.599314
FBgn0261602	0.119891	10.5351	4.23398	0.0738857	0.599314
FBgn0041775	-0.239615	6.64868	4.2323	0.0739326	0.599314
FBgn0050045	0.827597	0.0233135	4.23151	0.0739545	0.599314
FBgn0035142	0.217746	6.32227	4.23107	0.0739667	0.599314
FBgn0051954	0.707679	2.5685	4.23684	0.0739723	0.599314
FBgn0035725	0.221951	2.226	4.22648	0.0740947	0.599314
FBgn0027835	-0.247749	10.3912	4.22634	0.0740986	0.599314
FBgn0052554	-0.34554	1.22927	4.22503	0.0741352	0.599314
FBgn0051361	-0.356687	1.44616	4.22229	0.0742119	0.599454
FBgn0037728	-0.175944	8.53026	4.21816	0.0743274	0.599854
FBgn0000032	-0.239301	4.81594	4.21452	0.0744294	0.599854
FBgn0035036	0.198329	2.11088	4.2138	0.0744497	0.599854
FBgn0038942	0.883556	0.706594	4.21019	0.0745513	0.599854
FBgn0028743	-0.226206	3.93425	4.20821	0.0746069	0.599854
FBgn0020496	-0.24221	7.23757	4.20782	0.0746178	0.599854
FBgn0004644	0.472385	1.50953	4.2012	0.0748048	0.600878
FBgn0033402	0.133204	5.46315	4.19054	0.0751067	0.60181
FBgn0067102	0.336229	3.70476	4.18892	0.0751526	0.60181
FBgn0032720	-0.163737	4.45682	4.18829	0.0751707	0.60181
FBgn0035452	0.396808	6.53819	4.18761	0.0751899	0.60181
FBgn0085485	0.581295	1.07309	4.18533	0.0752549	0.60181
FBgn0039159	-0.145603	4.90762	4.1845	0.0752783	0.60181
FBgn0022959	-0.184306	8.36905	4.18186	0.0753536	0.601935
FBgn0260393	0.324511	4.96716	4.17843	0.0754515	0.60224
FBgn0005674	-0.372332	8.22644	4.17541	0.0755379	0.60244
FBgn0263289	0.152146	7.04364	4.17327	0.0755994	0.60244
FBgn0046214	-0.225065	8.16814	4.17122	0.0756581	0.60244
FBgn0040351	-0.332661	0.665905	4.16246	0.0759098	0.60244
FBgn0025724	-0.265938	7.72218	4.16242	0.075911	0.60244
FBgn0039439	1.32363	8.09812	4.26699	0.0759488	0.60244
FBgn0032169	-0.260188	2.42591	4.15957	0.0759931	0.60244
FBgn0264794	0.248503	2.52158	4.15644	0.0760834	0.60244
FBgn0034599	-0.214574	2.4364	4.15453	0.0761385	0.60244
FBgn0035856	1.24596	6.18897	4.25957	0.076154	0.60244
FBgn0039052	-0.308159	5.29121	4.15121	0.0762346	0.60244
FBgn0033760	0.347571	6.81283	4.15039	0.0762584	0.60244
FBgn0000412	-0.24322	5.9489	4.1497	0.0762782	0.60244
FBgn0034087	-0.198226	8.06482	4.1468	0.0763623	0.60244
FBgn0036610	0.759281	2.69916	4.17094	0.0764334	0.60244
FBgn0086671	0.831737	4.19518	4.21673	0.0764699	0.60244
FBgn0266095	0.601509	1.44853	4.14068	0.0765402	0.60244
FBgn0033241	-0.128227	7.02931	4.13664	0.076658	0.60244
FBgn0025802	0.15319	5.55851	4.13587	0.0766804	0.60244
FBgn0263476	1.09864	4.44383	4.23689	0.0767862	0.60244
FBgn0020508	0.444539	10.1699	4.13781	0.0767869	0.60244
FBgn0039665	0.34384	2.68627	4.13071	0.0768311	0.60244
FBgn0031229	-0.190392	5.27184	4.13011	0.0768489	0.60244
FBgn0033587	1.27791	3.22063	4.22723	0.0770575	0.603335
FBgn0003450	0.519842	1.41013	4.12214	0.0770825	0.603335
FBgn0033051	0.222218	4.00306	4.11898	0.0771752	0.603355
FBgn0035625	2.20566	2.6205	4.22161	0.0772161	0.603355
FBgn0030090	-0.274055	2.46956	4.11595	0.0772643	0.603355
FBgn0010438	-0.225704	5.05694	4.1107	0.0774192	0.603951
FBgn0265630	-0.143703	5.34163	4.10776	0.0775062	0.603951
FBgn0053514	0.262126	5.16877	4.10729	0.0775202	0.603951
FBgn0021800	-0.377895	2.5643	4.09962	0.0777475	0.60428
FBgn0039450	-0.207303	5.81442	4.09888	0.0777696	0.60428
FBgn0015038	0.482689	2.41995	4.09818	0.0777904	0.60428
FBgn0024188	-0.142368	4.95486	4.0978	0.0778017	0.60428
FBgn0025624	0.262198	3.28371	4.09416	0.0779099	0.604551
FBgn0052571	0.252105	8.45722	4.09233	0.0779645	0.604551
FBgn0039875	-0.150736	5.72837	4.0876	0.0781055	0.604551
FBgn0263594	-0.184332	9.45495	4.08681	0.0781291	0.604551
FBgn0030341	-0.187604	6.02821	4.0855	0.0781683	0.604551
FBgn0028394	0.336809	4.83918	4.08458	0.0781959	0.604551
FBgn0038380	0.291094	2.26572	4.07028	0.0786254	0.604764
FBgn0259176	0.220994	7.4862	4.06706	0.0787222	0.604764
FBgn0086377	0.14393	5.18293	4.06597	0.0787553	0.604764
FBgn0265185	0.231307	7.28339	4.06523	0.0787776	0.604764
FBgn0023495	1.00556	2.58806	4.1188	0.078835	0.604764
FBgn0010015	-0.158753	5.01714	4.06085	0.07891	0.604764
FBgn0030053	0.283722	3.69335	4.06048	0.0789213	0.604764
FBgn0035498	0.141949	7.00087	4.05684	0.0790316	0.604764
FBgn0034819	0.874788	5.81959	4.14158	0.0790581	0.604764
FBgn0029719	0.582356	0.527039	4.05567	0.0790673	0.604764
FBgn0013679	-0.793551	9.1152	4.13238	0.0791212	0.604764
FBgn0261625	-0.216721	6.50353	4.05301	0.0791478	0.604764
FBgn0086442	0.145724	5.31922	4.052	0.0791784	0.604764
FBgn0024360	-0.18404	4.33046	4.05118	0.0792035	0.604764
FBgn0085736	-0.243786	2.42152	4.05002	0.0792387	0.604764
FBgn0021944	-0.218781	4.9592	4.04967	0.0792496	0.604764
FBgn0002736	-0.174056	5.85396	4.04789	0.0793038	0.604764
FBgn0003392	-0.135869	6.63576	4.04786	0.0793046	0.604764
FBgn0036756	0.381352	4.73502	4.04491	0.0793945	0.604764
FBgn0051102	0.23724	3.3317	4.042	0.0794835	0.604764
FBgn0036789	-0.287564	3.21663	4.0411	0.079511	0.604764
FBgn0021814	0.198552	4.49775	4.03786	0.0796101	0.604764
FBgn0032339	0.190089	3.63403	4.03626	0.0796591	0.604764
FBgn0031117	-0.314532	4.58638	4.0362	0.0796609	0.604764
FBgn0032393	-0.186936	5.69037	4.03376	0.0797359	0.604878
FBgn0030343	-0.217597	6.21115	4.02713	0.0799394	0.605967
FBgn0010551	-0.139214	8.25144	4.02265	0.0800777	0.606215
FBgn0037478	-0.235116	2.6604	4.02076	0.080136	0.606215
FBgn0004177	-0.132246	7.36	4.02023	0.0801522	0.606215
FBgn0036536	-0.247929	2.24226	4.01796	0.0802223	0.606291
FBgn0037934	1.03269	6.16072	4.11093	0.0804251	0.607369
FBgn0022774	-0.230837	6.27591	4.00552	0.0806085	0.607473
FBgn0039817	0.975727	0.968087	4.0045	0.0806523	0.607473
FBgn0033124	0.361255	4.91193	4.00385	0.0806604	0.607473
FBgn0036249	0.22774	2.3912	4.00323	0.0806795	0.607473
FBgn0039509	0.349273	3.79968	3.99656	0.0808878	0.608192
FBgn0051658	0.603738	0.00464601	3.99435	0.080957	0.608192
FBgn0010333	-0.19042	5.92592	3.99278	0.081006	0.608192
FBgn0036529	-1.47862	3.42143	4.08672	0.0811503	0.608192
FBgn0039440	1.17165	7.81992	4.08538	0.0811906	0.608192
FBgn0029941	-0.177581	5.876	3.98643	0.0812053	0.608192
FBgn0035254	-0.304467	1.73526	3.98521	0.0812436	0.608192
FBgn0263593	0.207917	7.28217	3.9836	0.0812942	0.608192
FBgn0034197	0.316068	5.83076	3.98287	0.0813172	0.608192
FBgn0264574	-0.210138	5.18903	3.97964	0.0814191	0.608393
FBgn0036099	-0.193815	6.43364	3.97819	0.0814646	0.608393
FBgn0031030	-0.193332	6.38748	3.97186	0.0816649	0.608882
FBgn0031611	0.193318	3.06064	3.96839	0.0817747	0.608882
FBgn0086357	-0.344106	9.81979	3.96659	0.0818318	0.608882
FBgn0031652	0.377301	2.42901	3.9665	0.0818347	0.608882
FBgn0014031	0.322685	5.21146	3.96446	0.0818993	0.608882
FBgn0035121	-0.396152	9.70322	3.96426	0.0819058	0.608882
FBgn0029833	-0.134681	5.44457	3.96217	0.0819722	0.608882
FBgn0020414	0.399624	6.41897	3.9605	0.0820254	0.608882
FBgn0083001	1.14682	3.90003	4.05633	0.0820727	0.608882
FBgn0030034	-0.266459	4.44466	3.95281	0.0822706	0.609902
FBgn0031530	-0.95381	6.56515	4.03055	0.0825769	0.611455
FBgn0033741	-0.429056	5.34746	3.94248	0.0826013	0.611455
FBgn0260855	-0.347941	6.18919	3.93803	0.0827446	0.611675
FBgn0031515	0.56462	3.32804	3.94294	0.082752	0.611675
FBgn0034420	0.145296	7.65762	3.93011	0.083	0.612784
FBgn0039437	0.988625	8.94721	4.02411	0.0830657	0.612784
FBgn0038767	0.206781	1.91733	3.92696	0.0831017	0.612784
FBgn0050055	0.284678	3.65921	3.92563	0.0831449	0.612784
FBgn0003134	-0.182691	5.54044	3.92101	0.0832946	0.61284
FBgn0266668	0.128914	4.40428	3.92012	0.0833236	0.61284
FBgn0034642	-0.179842	4.04952	3.91978	0.0833345	0.61284
FBgn0038722	-0.173124	3.10608	3.91751	0.0834083	0.612936
FBgn0010747	-0.271038	7.3731	3.91464	0.0835018	0.613176
FBgn0039163	-0.158593	5.64233	3.9088	0.0836925	0.613848
FBgn0261999	-0.171419	5.99092	3.90751	0.0837346	0.613848
FBgn0039848	-0.691472	0.64693	3.90625	0.0837756	0.613848
FBgn0003996	-0.170184	4.56941	3.90155	0.0839295	0.614348
FBgn0034744	0.169758	4.44988	3.90046	0.0839655	0.614348
FBgn0034181	-0.385249	5.93454	3.89799	0.0840464	0.614494
FBgn0011802	-0.390136	3.09557	3.89207	0.0842411	0.614761
FBgn0035545	0.630518	7.83496	3.92337	0.084302	0.614761
FBgn0261503	-0.628184	2.38041	3.88587	0.0844457	0.614761
FBgn0030196	-0.33198	2.29945	3.88584	0.0844469	0.614761
FBgn0038652	-0.357095	6.79158	3.88498	0.0844753	0.614761
FBgn0038870	-0.138904	5.41364	3.8784	0.084693	0.614761
FBgn0037647	0.173737	4.16247	3.87746	0.0847244	0.614761
FBgn0032935	0.318795	3.9972	3.8734	0.0848593	0.614761
FBgn0053774	-0.227587	4.82	3.87293	0.084875	0.614761
FBgn0004397	0.12643	6.24968	3.87216	0.0849006	0.614761
FBgn0036183	0.553658	2.69368	3.87129	0.0849296	0.614761
FBgn0031629	0.454027	9.9433	3.88119	0.0849964	0.614761
FBgn0027836	0.376228	5.29532	3.86746	0.0850572	0.614761
FBgn0259834	0.220338	5.28192	3.86698	0.0850732	0.614761
FBgn0037974	0.331969	3.70667	3.86656	0.0850869	0.614761
FBgn0035607	0.169081	5.46009	3.86305	0.0852043	0.614761
FBgn0023519	-0.117479	5.01438	3.86273	0.085215	0.614761
FBgn0040339	-0.255088	2.7628	3.86174	0.0852481	0.614761
FBgn0028371	0.1699	7.85213	3.86115	0.0852679	0.614761
FBgn0266449	-0.167484	7.01345	3.85917	0.085334	0.614761
FBgn0011204	-0.196759	6.72708	3.85737	0.0853945	0.614761
FBgn0030629	0.411526	0.934189	3.85654	0.0854223	0.614761
FBgn0243486	0.349805	2.28698	3.85213	0.0855704	0.615388
FBgn0032437	0.388907	1.51637	3.8431	0.0858747	0.616425
FBgn0027081	-0.149068	7.92963	3.84212	0.0859077	0.616425
FBgn0037370	-0.130745	5.19913	3.84194	0.085914	0.616425
FBgn0032876	-0.290439	4.20095	3.84018	0.0859734	0.616425
FBgn0264542	0.212126	2.89083	3.83345	0.0862015	0.616425
FBgn0001145	-0.207141	7.81392	3.83212	0.0862467	0.616425
FBgn0021895	-0.305516	3.95577	3.83009	0.0863157	0.616425
FBgn0039684	1.82992	1.67833	3.92185	0.0863242	0.616425
FBgn0035734	-0.285529	2.02471	3.82929	0.0863428	0.616425
FBgn0033913	-0.187397	7.53388	3.82749	0.0864042	0.616425
FBgn0037778	-0.183644	2.8455	3.82599	0.086455	0.616425
FBgn0043002	-0.234186	2.58827	3.82144	0.0866102	0.616425
FBgn0031263	0.390268	6.56778	3.82032	0.0866487	0.616425
FBgn0261575	0.820438	4.74472	3.89244	0.0866504	0.616425
FBgn0032884	-0.119689	6.16166	3.81891	0.0866968	0.616425
FBgn0264296	0.285183	4.64212	3.81832	0.0867168	0.616425
FBgn0025457	-0.241974	4.1219	3.81625	0.0867877	0.616425
FBgn0004191	0.685596	7.1424	3.85349	0.0868992	0.616425
FBgn0037672	-0.407681	1.64985	3.81242	0.086919	0.616425
FBgn0031568	-0.92367	2.77017	3.86121	0.0869357	0.616425
FBgn0020655	-0.190325	6.49556	3.80946	0.0870209	0.616596
FBgn0028375	-0.164646	5.55956	3.80525	0.0871654	0.617188
FBgn0032192	0.368179	3.81638	3.79169	0.087634	0.618997
FBgn0039238	0.347375	3.19288	3.7915	0.0876408	0.618997
FBgn0002283	0.166946	3.27156	3.7908	0.0876649	0.618997
FBgn0263470	0.826027	8.47617	3.86199	0.0876662	0.618997
FBgn0011826	-0.302507	4.90625	3.78646	0.0878158	0.619079
FBgn0043799	-0.254916	2.21837	3.78329	0.0879259	0.619079
FBgn0065055	0.649552	1.85462	3.78241	0.0879568	0.619079
FBgn0038387	-0.177263	4.82382	3.78203	0.08797	0.619079
FBgn0038431	0.372737	3.404	3.77997	0.0880417	0.619079
FBgn0038354	0.394195	3.89283	3.7775	0.0881278	0.619079
FBgn0037972	0.76089	2.36953	3.79553	0.0881618	0.619079
FBgn0023549	-0.268383	4.3987	3.7753	0.0882049	0.619079
FBgn0029848	-0.372444	2.1251	3.77459	0.0882296	0.619079
FBgn0033821	0.270805	4.63074	3.7712	0.0883484	0.619482
FBgn0015351	0.153101	2.68709	3.76868	0.0884366	0.61967
FBgn0030456	-0.234617	4.43766	3.76381	0.0886079	0.620029
FBgn0034179	0.166655	5.30926	3.76248	0.0886546	0.620029
FBgn0003057	1.0412	6.7293	3.84992	0.0887174	0.620029
FBgn0032217	-0.222566	6.91916	3.75837	0.0887994	0.620029
FBgn0030391	-0.230474	2.21306	3.75813	0.0888077	0.620029
FBgn0026575	-0.220026	5.26151	3.75626	0.0888738	0.620029
FBgn0030403	-0.134656	6.11147	3.75502	0.0889177	0.620029
FBgn0038737	-0.196137	2.64004	3.75109	0.0890565	0.620568
FBgn0027506	0.184408	4.24355	3.74688	0.0892058	0.621098
FBgn0031822	-0.17559	3.77346	3.74548	0.0892555	0.621098
FBgn0038790	-1.01022	1.46152	3.76454	0.0895352	0.621883
FBgn0032378	-0.213078	5.06857	3.73663	0.0895707	0.621883
FBgn0026479	-0.181812	6.49398	3.73301	0.0896997	0.621883
FBgn0037956	0.467565	4.65388	3.73334	0.089742	0.621883
FBgn0033816	-0.247026	6.21168	3.73173	0.0897456	0.621883
FBgn0031752	0.15175	5.12824	3.72483	0.0899927	0.621883
FBgn0038065	-0.140053	5.17504	3.72147	0.0901136	0.621883
FBgn0026602	0.125196	3.59569	3.71896	0.0902038	0.621883
FBgn0013684	-0.834536	8.45665	3.78606	0.0903193	0.621883
FBgn0243511	-0.179361	5.28499	3.71247	0.0904377	0.621883
FBgn0034933	-0.219052	4.19404	3.71155	0.0904711	0.621883
FBgn0030038	-0.477028	6.68827	3.71355	0.090498	0.621883
FBgn0030692	-0.166848	7.14698	3.7086	0.0905777	0.621883
FBgn0041629	0.378351	3.63508	3.70158	0.0908321	0.621883
FBgn0035772	-0.239478	6.77938	3.6924	0.0911665	0.621883
FBgn0028497	0.131671	4.24657	3.69187	0.0911857	0.621883
FBgn0034602	0.224356	3.67941	3.68855	0.0913072	0.621883
FBgn0259171	0.265841	4.49173	3.68783	0.0913334	0.621883
FBgn0031384	-0.245859	1.94004	3.68692	0.0913669	0.621883
FBgn0034512	1.13367	2.86494	3.75954	0.0913756	0.621883
FBgn0027287	-0.204465	6.23443	3.68593	0.091403	0.621883
FBgn0262840	0.772182	1.15873	3.68564	0.0914138	0.621883
FBgn0035806	1.01034	2.02942	3.72334	0.091433	0.621883
FBgn0034447	-0.274726	4.80584	3.68449	0.0914556	0.621883
FBgn0038020	0.256008	5.19999	3.68293	0.0915131	0.621883
FBgn0052772	0.179231	3.33001	3.67905	0.0916553	0.621883
FBgn0027560	0.237744	7.98706	3.67729	0.09172	0.621883
FBgn0036685	-0.161764	5.00003	3.67721	0.0917232	0.621883
FBgn0033792	0.754599	3.73452	3.72554	0.0917392	0.621883
FBgn0034315	0.103176	5.60023	3.67499	0.0918049	0.621883
FBgn0046875	-0.527784	6.92455	3.68783	0.0919497	0.621883
FBgn0004648	-0.261573	7.10023	3.66914	0.0920207	0.621883
FBgn0038295	0.327545	0.536197	3.66706	0.0920975	0.621883
FBgn0004049	0.19562	4.46381	3.66589	0.0921408	0.621883
FBgn0040071	-0.174186	4.58381	3.66486	0.0921788	0.621883
FBgn0063497	0.257622	7.41564	3.66485	0.0921792	0.621883
FBgn0035546	1.55115	4.16872	3.74811	0.0922563	0.621883
FBgn0033203	1.18224	1.41894	3.69854	0.0923317	0.621883
FBgn0050101	-2.10711	5.66447	3.74584	0.0923372	0.621883
FBgn0035227	0.157881	4.60825	3.65975	0.0923684	0.621883
FBgn0032123	0.135684	6.57407	3.65951	0.0923771	0.621883
FBgn0027619	-0.139238	7.93272	3.65862	0.0924104	0.621883
FBgn0036332	0.222288	3.04017	3.6527	0.0926305	0.621883
FBgn0027524	-0.148349	4.2401	3.65074	0.0927034	0.621883
FBgn0003205	-0.124912	5.63228	3.6499	0.0927349	0.621883
FBgn0035374	-0.203041	5.84703	3.64972	0.0927417	0.621883
FBgn0037122	1.3988	4.67147	3.73449	0.0927436	0.621883
FBgn0030941	0.194724	4.23271	3.64797	0.0928071	0.621883
FBgn0002774	-0.268739	4.37529	3.6476	0.0928209	0.621883
FBgn0030519	-0.182117	8.42393	3.64616	0.0928747	0.621883
FBgn0035449	-0.136268	4.41536	3.64586	0.0928859	0.621883
FBgn0265533	0.485318	0.736172	3.64558	0.0928964	0.621883
FBgn0039203	0.450824	5.01646	3.64291	0.0930088	0.621883
FBgn0051548	0.151465	6.40432	3.64227	0.0930202	0.621883
FBgn0038233	-0.215019	3.55084	3.63953	0.093123	0.621883
FBgn0039836	-0.136918	3.65002	3.63885	0.0931483	0.621883
FBgn0026079	-0.193025	5.83089	3.63862	0.0931572	0.621883
FBgn0000426	-0.195682	4.21628	3.63769	0.0931921	0.621883
FBgn0026169	0.820679	8.27239	3.70372	0.0932072	0.621883
FBgn0023512	-0.170532	5.35724	3.63702	0.0932173	0.621883
FBgn0033928	-0.199264	3.07946	3.63319	0.0933614	0.621883
FBgn0036125	0.608985	2.3996	3.63275	0.0933777	0.621883
FBgn0037125	1.94302	6.84298	3.71668	0.093386	0.621883
FBgn0086447	-0.326023	2.79971	3.63219	0.093399	0.621883
FBgn0037580	-0.251179	7.92658	3.63067	0.0934561	0.621883
FBgn0029820	0.619424	5.62396	3.66532	0.0935537	0.621883
FBgn0016075	-0.136405	10.6993	3.62785	0.0935625	0.621883
FBgn0038331	-0.121843	5.43037	3.62762	0.093571	0.621883
FBgn0034638	0.811491	6.01496	3.69546	0.0936181	0.621883
FBgn0038438	-0.117925	5.09542	3.62286	0.093751	0.622211
FBgn0000042	-0.0829992	11.9844	3.61937	0.0938834	0.622211
FBgn0259228	-0.22011	6.33724	3.61853	0.0939151	0.622211
FBgn0036639	1.96758	6.41975	3.69792	0.0940694	0.622211
FBgn0037218	-0.215829	5.16495	3.60978	0.094248	0.622211
FBgn0033240	0.317161	2.8589	3.60976	0.0942486	0.622211
FBgn0082994	0.945994	2.23678	3.64609	0.0942707	0.622211
FBgn0030826	1.44782	0.50905	3.64094	0.0943811	0.622211
FBgn0033775	0.278514	3.09539	3.60338	0.094492	0.622211
FBgn0032484	0.305577	0.711492	3.60223	0.094536	0.622211
FBgn0250874	-0.106749	5.98689	3.60217	0.0945386	0.622211
FBgn0040726	0.36008	2.64214	3.59974	0.0946315	0.622211
FBgn0051522	-0.805232	7.01706	3.66234	0.0946495	0.622211
FBgn0053346	0.476892	0.47341	3.59513	0.0948084	0.622211
FBgn0035593	-0.163221	4.03302	3.59496	0.0948147	0.622211
FBgn0037683	0.296812	4.63811	3.59493	0.0948161	0.622211
FBgn0035829	-0.18774	3.67971	3.5935	0.094871	0.622211
FBgn0032050	-0.307619	5.63621	3.59349	0.0948713	0.622211
FBgn0003502	0.282154	6.08738	3.58898	0.095045	0.622211
FBgn0001089	0.33753	4.10746	3.58831	0.0950708	0.622211
FBgn0030073	0.391549	6.33179	3.58698	0.0951221	0.622211
FBgn0030813	0.267036	1.27186	3.58579	0.0951677	0.622211
FBgn0031868	-0.206551	5.24119	3.58124	0.0953436	0.622211
FBgn0039454	0.748423	3.10054	3.60681	0.095675	0.622211
FBgn0039758	-1.61253	3.94788	3.65358	0.0957104	0.622211
FBgn0262125	-0.227225	7.97659	3.57141	0.0957248	0.622211
FBgn0032292	-0.191524	5.46845	3.5699	0.0957837	0.622211
FBgn0011710	-0.296324	4.80722	3.56758	0.095874	0.622211
FBgn0004868	-0.162055	8.41122	3.56734	0.0958832	0.622211
FBgn0086359	-1.65432	5.81551	3.64637	0.0959808	0.622211
FBgn0011217	-0.139026	8.90671	3.56483	0.0959812	0.622211
FBgn0010470	-0.72652	8.00109	3.61385	0.0959892	0.622211
FBgn0052485	0.304322	3.4516	3.56009	0.0961663	0.622211
FBgn0032703	-0.194154	4.54351	3.55423	0.0963962	0.622211
FBgn0026533	-0.271542	6.54646	3.55349	0.0964249	0.622211
FBgn0261439	-0.116883	8.99286	3.55323	0.0964352	0.622211
FBgn0031632	-0.217044	1.73229	3.55293	0.0964471	0.622211
FBgn0023524	0.269398	0.948899	3.55222	0.0964749	0.622211
FBgn0053080	-0.179275	6.13344	3.54994	0.0965647	0.622211
FBgn0043012	-0.161715	4.94572	3.54979	0.0965705	0.622211
FBgn0011705	0.310131	3.69146	3.54846	0.0966229	0.622211
FBgn0029851	0.221101	5.09252	3.54825	0.0966312	0.622211
FBgn0085195	1.08746	6.04197	3.62797	0.0966754	0.622211
FBgn0037166	0.28779	2.99283	3.546	0.0967197	0.622211
FBgn0029067	-0.23177	5.07594	3.54472	0.09677	0.622211
FBgn0031118	-0.421853	5.33889	3.54141	0.0969009	0.622211
FBgn0051133	-0.186473	3.79347	3.5414	0.0969011	0.622211
FBgn0036749	-0.381131	4.68698	3.541	0.0969171	0.622211
FBgn0035293	0.345674	5.01343	3.5396	0.0969722	0.622211
FBgn0036998	-0.213299	4.23636	3.53854	0.0970142	0.622211
FBgn0262423	0.511582	2.00832	3.53722	0.0970666	0.622211
FBgn0063493	0.547729	5.21344	3.56167	0.0971059	0.622211
FBgn0039212	-0.189722	4.57072	3.53623	0.0971059	0.622211
FBgn0086694	-0.271078	4.42078	3.53357	0.0972113	0.622211
FBgn0015737	-0.50418	6.68223	3.54592	0.0973075	0.622211
FBgn0010340	-0.129409	3.94894	3.5295	0.0973728	0.622211
FBgn0039626	-0.283892	2.79084	3.52766	0.0974462	0.622211
FBgn0032049	1.49577	5.72227	3.607	0.0974751	0.622211
FBgn0034493	0.576506	3.22303	3.53892	0.0974773	0.622211
FBgn0034346	-0.21292	5.37385	3.52175	0.0976817	0.622211
FBgn0002773	0.20329	13.0919	3.52005	0.0977496	0.622211
FBgn0050054	-0.265879	1.73933	3.51789	0.097836	0.622211
FBgn0035807	-0.130991	4.67046	3.51706	0.0978693	0.622211
FBgn0037709	-0.173104	6.74348	3.50935	0.0981783	0.622211
FBgn0052190	0.139481	6.97048	3.509	0.0981925	0.622211
FBgn0266549	-0.287399	3.22847	3.50635	0.0982992	0.622211
FBgn0015359	0.138305	3.61928	3.50551	0.098333	0.622211
FBgn0051626	-1.84695	6.57042	3.58175	0.0984496	0.622211
FBgn0085220	-0.168774	5.4182	3.50168	0.0984871	0.622211
FBgn0037124	1.77978	6.7277	3.58053	0.0984974	0.622211
FBgn0027499	-0.310498	4.9679	3.50044	0.0985373	0.622211
FBgn0263391	-0.186566	8.39581	3.49872	0.098607	0.622211
FBgn0032456	0.237082	8.31213	3.49572	0.0987281	0.622211
FBgn0015754	0.123443	6.31578	3.49504	0.0987558	0.622211
FBgn0020618	0.106339	10.6893	3.49375	0.0988078	0.622211
FBgn0037680	0.186531	4.03173	3.49289	0.098843	0.622211
FBgn0023213	-0.213496	10.1642	3.49267	0.0988517	0.622211
FBgn0260439	0.107516	7.59664	3.49188	0.0988838	0.622211
FBgn0035402	-0.234884	5.90709	3.49084	0.0989259	0.622211
FBgn0000454	-0.135869	8.12209	3.48903	0.0989995	0.622211
FBgn0086913	0.281706	0.671839	3.48671	0.0990937	0.622211
FBgn0032601	0.420105	5.80386	3.48463	0.0991785	0.622211
FBgn0030833	-0.249818	2.99725	3.48343	0.0992272	0.622211
FBgn0039315	0.669281	4.89861	3.52658	0.0992559	0.622211
FBgn0034978	0.313778	1.34619	3.48169	0.099298	0.622211
FBgn0036817	2.90151	5.53208	3.55961	0.0993151	0.622211
FBgn0000384	-0.155948	4.49117	3.48006	0.0993647	0.622211
FBgn0038161	0.357568	3.72652	3.47829	0.0994372	0.622211
FBgn0040729	0.32454	3.23033	3.47517	0.0995647	0.622211
FBgn0040299	-0.199641	6.23314	3.47363	0.0996277	0.622211
FBgn0028691	-0.175311	6.66337	3.47151	0.0997146	0.622211
FBgn0026582	0.251046	2.35171	3.47097	0.0997367	0.622211
FBgn0250848	0.124147	7.47153	3.47038	0.0997609	0.622211
FBgn0039023	-0.322104	1.27854	3.46858	0.099835	0.622211
FBgn0263469	0.557316	0.663016	3.46852	0.0998371	0.622211
FBgn0030882	-1.21099	1.86715	3.52282	0.0998855	0.622211
FBgn0263199	-0.129096	6.14586	3.4643	0.100011	0.622211
FBgn0033590	1.10734	4.67158	3.54097	0.100051	0.622211
FBgn0037764	-0.384955	0.837272	3.46234	0.100092	0.622211
FBgn0033502	-0.225341	3.31884	3.46109	0.100143	0.622211
FBgn0004779	1.12599	7.01888	3.53635	0.100235	0.622211
FBgn0038083	1.01759	6.56759	3.5319	0.100412	0.622211
FBgn0040699	0.693293	2.21843	3.45796	0.100519	0.622211
FBgn0035901	-0.298688	4.4639	3.45069	0.100573	0.622211
FBgn0016076	1.07311	4.14951	3.52784	0.100574	0.622211
FBgn0030063	-0.23041	3.33527	3.44987	0.100607	0.622211
FBgn0037835	0.279535	4.0096	3.44934	0.100629	0.622211
FBgn0262951	-0.416659	2.05394	3.44905	0.100641	0.622211
FBgn0030306	-0.186254	6.75301	3.44827	0.100674	0.622211
FBgn0027497	-0.132431	5.28806	3.44571	0.10078	0.622211
FBgn0045038	0.192442	3.18856	3.44535	0.100795	0.622211
FBgn0032293	-0.202531	2.15388	3.44532	0.100796	0.622211
FBgn0037566	-0.156156	5.65937	3.44376	0.100861	0.622211
FBgn0083008	0.364131	1.99234	3.44211	0.10093	0.622211
FBgn0261584	-0.170654	4.61804	3.44152	0.100954	0.622211
FBgn0262717	-0.772418	7.88894	3.49673	0.100963	0.622211
FBgn0036023	0.549459	4.71066	3.46382	0.101047	0.622211
FBgn0043364	0.35988	5.88962	3.43614	0.101179	0.622211
FBgn0036454	0.968542	5.53232	3.51169	0.101222	0.622211
FBgn0261086	0.369677	0.902497	3.43383	0.101275	0.622211
FBgn0027086	-0.197629	8.11593	3.43093	0.101397	0.622211
FBgn0265187	-0.950689	5.72158	3.50673	0.101423	0.622211
FBgn0028646	-0.208848	7.79011	3.42988	0.101441	0.622211
FBgn0032477	0.140441	4.66138	3.42805	0.101518	0.622211
FBgn0013674	-0.393448	14.0185	3.45347	0.101538	0.622211
FBgn0002787	-0.2573	6.46207	3.42553	0.101624	0.622211
FBgn0022985	-0.167131	5.34736	3.42507	0.101643	0.622211
FBgn0037518	0.390883	2.92235	3.42281	0.101738	0.622211
FBgn0034565	-1.61954	1.8138	3.49749	0.101797	0.622211
FBgn0033378	-0.205803	5.31889	3.42079	0.101823	0.622211
FBgn0261995	0.162649	5.44868	3.42036	0.101841	0.622211
FBgn0034141	0.31931	4.97155	3.41984	0.101863	0.622211
FBgn0034709	0.574824	6.79678	3.44564	0.101863	0.622211
FBgn0030048	-0.142843	3.71811	3.41553	0.102045	0.622484
FBgn0036008	-0.194174	3.55292	3.41431	0.102097	0.622484
FBgn0030041	-0.263379	7.99009	3.41345	0.102133	0.622484
FBgn0265705	-0.644238	0.471638	3.41264	0.102167	0.622484
FBgn0034634	0.280037	1.39715	3.41148	0.102216	0.622484
FBgn0063492	0.344307	5.77594	3.40824	0.102354	0.622574
FBgn0262801	-0.232482	7.25749	3.40804	0.102362	0.622574
FBgn0037853	0.720177	3.79778	3.44872	0.102456	0.622574
FBgn0038772	-0.228644	2.74058	3.4042	0.102526	0.622574
FBgn0038151	0.824133	5.25064	3.46758	0.102539	0.622574
FBgn0002565	0.656951	2.80029	3.41557	0.102768	0.623272
FBgn0031020	-0.196391	7.35997	3.39827	0.102778	0.623272
FBgn0083123	-0.417303	5.13869	3.39532	0.102904	0.623504
FBgn0030511	-0.148076	4.45903	3.39448	0.10294	0.623504
FBgn0031535	0.545319	4.37169	3.41351	0.103128	0.624268
FBgn0267378	-0.178955	6.5982	3.38707	0.103257	0.62433
FBgn0010417	0.188751	3.79702	3.38467	0.10336	0.62433
FBgn0085465	-0.551591	0.88863	3.38387	0.103395	0.62433
FBgn0000079	1.60819	2.5214	3.4577	0.10343	0.62433
FBgn0053302	0.800608	6.71447	3.44094	0.103508	0.62433
FBgn0037920	-0.232422	2.25776	3.38122	0.103509	0.62433
FBgn0035282	0.429491	1.08563	3.37726	0.103679	0.624986
FBgn0002930	0.210199	4.12608	3.37062	0.103966	0.625654
FBgn0051648	-0.128292	4.15529	3.36963	0.104009	0.625654
FBgn0004574	0.114637	6.70365	3.36767	0.104094	0.625654
FBgn0030189	0.344078	1.98904	3.36636	0.104151	0.625654
FBgn0034883	-0.287644	4.74571	3.36553	0.104187	0.625654
FBgn0259227	0.190119	5.75778	3.36254	0.104317	0.625654
FBgn0033677	0.678285	3.78127	3.3958	0.104384	0.625654
FBgn0036593	-2.19098	3.53675	3.43216	0.104496	0.625654
FBgn0011741	-0.163834	4.15957	3.35767	0.104529	0.625654
FBgn0003334	-0.197388	4.82352	3.35757	0.104534	0.625654
FBgn0031097	-0.754442	8.80029	3.41564	0.104534	0.625654
FBgn0038001	0.68834	0.911664	3.35756	0.104534	0.625654
FBgn0030837	0.171815	5.85771	3.35421	0.10468	0.62616
FBgn0035024	-0.121454	5.3755	3.35096	0.104823	0.626639
FBgn0035842	-0.27675	3.11825	3.34885	0.104915	0.626819
FBgn0037174	-0.226888	2.82686	3.34547	0.105063	0.627333
FBgn0015039	0.817625	7.20708	3.39987	0.105244	0.627439
FBgn0259818	-0.772338	2.7337	3.36781	0.105331	0.627439
FBgn0015794	0.177832	4.76057	3.33583	0.105487	0.627439
FBgn0039219	-0.119759	5.87921	3.33524	0.105513	0.627439
FBgn0036488	-0.166998	5.68694	3.33214	0.10565	0.627439
FBgn0035850	0.186864	4.85917	3.32995	0.105747	0.627439
FBgn0085277	1.61639	3.06537	3.40258	0.10575	0.627439
FBgn0032144	0.187788	9.37529	3.32932	0.105775	0.627439
FBgn0050296	0.129113	6.60682	3.32916	0.105782	0.627439
FBgn0030358	0.324713	1.06064	3.3284	0.105816	0.627439
FBgn0020392	-0.20158	6.37302	3.32716	0.105871	0.627439
FBgn0033749	0.243806	2.35966	3.32589	0.105927	0.627439
FBgn0052428	-0.192509	4.52345	3.32265	0.106071	0.627439
FBgn0051721	0.257525	3.09224	3.32159	0.106118	0.627439
FBgn0036136	-0.115878	5.00148	3.32138	0.106127	0.627439
FBgn0036007	0.151882	6.77709	3.32057	0.106164	0.627439
FBgn0024248	0.150703	5.23832	3.3193	0.10622	0.627439
FBgn0011581	0.276352	2.5409	3.31926	0.106222	0.627439
FBgn0035630	-0.164464	9.01004	3.31675	0.106334	0.627439
FBgn0040363	0.150189	3.45922	3.31429	0.106444	0.627439
FBgn0039966	0.220298	2.80163	3.31415	0.10645	0.627439
FBgn0034718	-0.17336	7.36088	3.31335	0.106486	0.627439
FBgn0262720	0.773271	5.48615	3.37174	0.106525	0.627439
FBgn0002914	-0.136742	5.37826	3.31142	0.106572	0.627439
FBgn0262029	-0.250696	3.66506	3.30497	0.106861	0.628772
FBgn0010591	-0.180154	7.39839	3.29886	0.107136	0.629255
FBgn0050354	-0.322063	1.49627	3.29877	0.10714	0.629255
FBgn0263659	-0.403887	5.55862	3.29711	0.107215	0.629255
FBgn0037574	-0.198101	3.18118	3.29539	0.107292	0.629255
FBgn0003567	-0.310655	5.06272	3.29532	0.107295	0.629255
FBgn0037606	-0.139674	4.43647	3.29409	0.107351	0.629255
FBgn0035432	-0.170835	6.12761	3.29143	0.107471	0.629255
FBgn0263413	-0.172273	4.98967	3.29071	0.107504	0.629255
FBgn0040798	1.15136	6.16187	3.36171	0.107515	0.629255
FBgn0039282	0.213511	1.31571	3.71629	0.107566	0.629255
FBgn0263198	-0.264766	5.18207	3.28733	0.107656	0.629418
FBgn0085440	0.33486	0.556575	3.28143	0.107924	0.630505
FBgn0040797	1.11828	4.94057	3.34709	0.108155	0.630505
FBgn0033598	1.39879	6.28372	3.34574	0.108215	0.630505
FBgn0031906	1.06369	2.12999	3.32055	0.108271	0.630505
FBgn0023529	-0.313125	8.73565	3.27242	0.108335	0.630505
FBgn0263492	1.62071	1.67528	3.34181	0.108388	0.630505
FBgn0039929	-0.162123	6.3301	3.27086	0.108406	0.630505
FBgn0032225	0.237818	1.63038	3.2676	0.108556	0.630505
FBgn0042101	0.521531	3.15947	3.26503	0.108729	0.630505
FBgn0043903	0.18478	4.69179	3.26362	0.108738	0.630505
FBgn0083972	0.56881	4.70468	3.29044	0.108755	0.630505
FBgn0028518	-0.135831	5.29172	3.26313	0.108761	0.630505
FBgn0000157	-0.298532	1.32662	3.26073	0.108871	0.630505
FBgn0034750	-0.132185	3.49746	3.26008	0.108901	0.630505
FBgn0028370	0.441364	0.787191	3.26	0.108905	0.630505
FBgn0051370	0.434559	4.8331	3.26004	0.108958	0.630505
FBgn0261722	-0.124775	6.14222	3.25606	0.109086	0.630505
FBgn0085356	0.610708	0.304753	3.25324	0.109216	0.630505
FBgn0032748	0.157135	3.88975	3.25168	0.109288	0.630505
FBgn0039779	-0.381714	3.99535	3.24848	0.109436	0.630505
FBgn0029962	0.359916	0.341149	3.2425	0.109714	0.630505
FBgn0033601	1.71638	2.4925	3.31107	0.109756	0.630505
FBgn0011241	0.225156	3.06062	3.23953	0.109851	0.630505
FBgn0040337	-0.11886	3.82143	3.23925	0.109865	0.630505
FBgn0038787	-0.151629	5.15667	3.23846	0.109902	0.630505
FBgn0038774	0.184789	7.68223	3.23782	0.109931	0.630505
FBgn0052204	0.441023	1.00109	3.23712	0.109964	0.630505
FBgn0027794	-0.166374	5.1165	3.23649	0.109993	0.630505
FBgn0267495	-0.556394	3.00998	3.24177	0.109996	0.630505
FBgn0030812	-0.239217	4.32536	3.23589	0.110021	0.630505
FBgn0031057	-0.186836	7.238	3.23579	0.110026	0.630505
FBgn0046704	-0.171639	5.97119	3.23481	0.110072	0.630505
FBgn0086686	0.147738	5.21164	3.23315	0.110149	0.630505
FBgn0001974	-0.347223	3.61566	3.23164	0.11022	0.630505
FBgn0036052	0.15778	3.04057	3.23015	0.110289	0.630505
FBgn0033667	0.788096	5.81721	3.28824	0.110301	0.630505
FBgn0083000	0.681694	1.62824	3.22974	0.110308	0.630505
FBgn0039757	0.111962	10.9256	3.22932	0.110328	0.630505
FBgn0038462	-0.24785	5.06524	3.2247	0.110545	0.630505
FBgn0033129	0.463751	2.35767	3.22446	0.110556	0.630505
FBgn0039305	-0.114579	4.55854	3.22377	0.110588	0.630505
FBgn0039141	0.120685	3.88554	3.22311	0.110619	0.630505
FBgn0032322	-0.254945	4.81943	3.22306	0.110621	0.630505
FBgn0025865	-0.178147	6.02699	3.22241	0.110652	0.630505
FBgn0033289	0.695006	3.36674	3.25034	0.110772	0.630505
FBgn0027084	-0.147713	7.25577	3.21964	0.110782	0.630505
FBgn0082953	-0.386317	0.884915	3.21926	0.1108	0.630505
FBgn0030183	0.333887	1.6761	3.218	0.11086	0.630505
FBgn0004462	0.167995	3.99259	3.21539	0.110982	0.630505
FBgn0014411	-0.182587	5.50638	3.21403	0.111047	0.630505
FBgn0030735	0.128301	5.31881	3.21231	0.111128	0.630505
FBgn0000146	0.347938	2.18326	3.21215	0.111135	0.630505
FBgn0004133	0.18838	2.772	3.21055	0.111211	0.630505
FBgn0031256	-0.170748	6.16574	3.21012	0.111232	0.630505
FBgn0034884	-0.384212	2.00062	3.20881	0.111293	0.630505
FBgn0038332	0.207081	1.61091	3.20785	0.111339	0.630505
FBgn0010038	0.425534	6.42383	3.20366	0.11155	0.631034
FBgn0034893	-0.13503	5.01893	3.20193	0.11162	0.631034
FBgn0039861	-0.182286	3.73272	3.20069	0.111679	0.631034
FBgn0003607	-0.143475	5.85141	3.20061	0.111682	0.631034
FBgn0004636	-0.182073	5.55339	3.19826	0.111794	0.631312
FBgn0051635	0.153777	5.55727	3.19563	0.111919	0.63161
FBgn0033703	1.87976	5.66672	3.2609	0.112038	0.63161
FBgn0086661	1.57085	7.35063	3.2607	0.112047	0.63161
FBgn0266000	-0.21517	5.63944	3.19191	0.112097	0.63161
FBgn0028541	-0.105484	5.9328	3.18882	0.112245	0.631765
FBgn0051075	0.239281	6.32139	3.18515	0.112421	0.631765
FBgn0004237	-0.436192	6.65284	3.18553	0.112452	0.631765
FBgn0052528	0.286629	6.0259	3.18385	0.112483	0.631765
FBgn0010228	-0.291581	7.24726	3.18234	0.112555	0.631765
FBgn0035246	0.158294	4.24567	3.18154	0.112594	0.631765
FBgn0036135	-0.126379	5.8678	3.18081	0.112629	0.631765
FBgn0037185	-0.239523	2.45967	3.18052	0.112643	0.631765
FBgn0039733	-0.21238	2.02473	3.17933	0.1127	0.631765
FBgn0014343	-0.264211	2.85533	3.1771	0.112808	0.631765
FBgn0000499	0.146808	3.35694	3.17699	0.112813	0.631765
FBgn0015011	0.311691	5.95443	3.17535	0.112892	0.631857
FBgn0086655	0.278234	3.35074	3.17245	0.113032	0.632292
FBgn0020429	-0.291959	2.77847	3.16811	0.113242	0.633116
FBgn0050360	0.332652	7.07024	3.16335	0.113473	0.633726
FBgn0067629	-0.268062	2.95891	3.16264	0.113507	0.633726
FBgn0263231	-0.275272	6.67114	3.16197	0.11354	0.633726
FBgn0023515	-0.361866	1.15312	3.15844	0.113711	0.634172
FBgn0020279	-0.219215	7.32912	3.15709	0.113777	0.634172
FBgn0000352	-0.19963	3.99452	3.15532	0.113863	0.634172
FBgn0032075	0.229554	8.02707	3.15181	0.114035	0.634172
FBgn0034201	0.592171	6.64166	3.17976	0.114069	0.634172
FBgn0022787	-0.211185	5.66793	3.15109	0.11407	0.634172
FBgn0025592	-0.112579	6.81221	3.14868	0.114188	0.634172
FBgn0030000	-0.184872	3.82399	3.14842	0.114201	0.634172
FBgn0035858	0.844717	5.51937	3.20991	0.114263	0.634172
FBgn0260856	-0.177559	3.87772	3.14644	0.114298	0.634172
FBgn0013710	-0.811042	1.8514	3.16268	0.114368	0.634172
FBgn0031249	0.520572	9.09879	3.16778	0.114396	0.634172
FBgn0037719	0.169989	4.22321	3.13964	0.114632	0.634172
FBgn0010425	0.171922	10.436	3.13859	0.114683	0.634172
FBgn0014870	-0.280773	5.25363	3.1378	0.114722	0.634172
FBgn0033065	0.501753	4.57706	3.15443	0.114846	0.634172
FBgn0035070	1.86012	3.72439	3.19855	0.114963	0.634172
FBgn0031360	0.239726	6.0497	3.13265	0.114976	0.634172
FBgn0085411	-1.22612	1.03674	3.16299	0.114978	0.634172
FBgn0039554	-0.166677	4.23152	3.13248	0.114985	0.634172
FBgn0033482	-0.252626	7.83467	3.1305	0.115083	0.634172
FBgn0031314	0.168883	2.90794	3.13016	0.115099	0.634172
FBgn0032940	-0.133573	6.84852	3.12931	0.115142	0.634172
FBgn0261612	0.791779	3.49074	3.17497	0.115224	0.634172
FBgn0086707	-0.25744	5.045	3.12757	0.115228	0.634172
FBgn0025595	-0.344419	4.77963	3.12707	0.115253	0.634172
FBgn0034598	-0.193739	4.97498	3.12347	0.115431	0.634429
FBgn0000150	-0.129173	9.8694	3.1223	0.115489	0.634429
FBgn0261552	-0.340621	8.14044	3.12109	0.115549	0.634429
FBgn0003028	0.33916	4.42321	3.12106	0.115551	0.634429
FBgn0015372	0.23564	2.83989	3.11743	0.115731	0.634701
FBgn0013676	-0.38411	13.0031	3.13738	0.115751	0.634701
FBgn0023175	-0.17917	6.61488	3.11456	0.115874	0.634701
FBgn0011708	-0.179902	6.04026	3.11422	0.115892	0.634701
FBgn0038876	-0.362026	4.01437	3.112	0.116002	0.634701
FBgn0264712	-0.292183	2.90763	3.11167	0.116019	0.634701
FBgn0034919	-0.158085	4.20211	3.11124	0.11604	0.634701
FBgn0052405	0.664952	7.29512	3.14171	0.116327	0.635736
FBgn0082980	0.461272	0.867992	3.10376	0.116415	0.635736
FBgn0028936	-0.269024	4.06337	3.10298	0.116454	0.635736
FBgn0038524	0.20234	4.20111	3.10041	0.116584	0.635736
FBgn0030973	-0.139417	4.46011	3.09903	0.116653	0.635736
FBgn0034736	-0.263635	3.64333	3.09687	0.116762	0.635736
FBgn0026261	-0.191081	6.1818	3.09653	0.116779	0.635736
FBgn0261609	-0.17454	7.68349	3.09642	0.116785	0.635736
FBgn0033166	-0.243609	4.84968	3.09529	0.116841	0.635736
FBgn0028688	-0.165485	6.50955	3.09393	0.11691	0.635736
FBgn0030529	0.190966	7.17377	3.09369	0.116922	0.635736
FBgn0029687	-0.145755	7.97512	3.08996	0.117111	0.636363
FBgn0034943	0.174637	4.31168	3.08892	0.117163	0.636363
FBgn0038196	-0.189235	5.89546	3.08398	0.117414	0.637141
FBgn0020639	0.403345	10.6093	3.09611	0.117433	0.637141
FBgn0003944	-0.19602	3.68374	3.08151	0.117539	0.637375
FBgn0053082	-0.324536	0.795876	3.07977	0.117628	0.637411
FBgn0001995	-0.111875	5.68274	3.07821	0.117707	0.637411
FBgn0262508	0.134438	8.53478	3.07653	0.117793	0.637411
FBgn0036640	0.25501	1.82209	3.07536	0.117853	0.637411
FBgn0036935	0.49349	2.6752	3.07409	0.117918	0.637411
FBgn0029895	0.159243	4.9018	3.07395	0.117924	0.637411
FBgn0260659	-0.220581	5.58208	3.06671	0.118295	0.639071
FBgn0264560	-0.194773	7.42399	3.06347	0.118461	0.639628
FBgn0030541	-2.30102	5.70142	3.1223	0.118679	0.640166
FBgn0031090	-0.161806	4.49473	3.05725	0.118782	0.640166
FBgn0015622	-0.191269	8.06257	3.05685	0.118802	0.640166
FBgn0263120	-0.146162	9.44968	3.05653	0.118818	0.640166
FBgn0015818	-0.397658	2.61967	3.05486	0.118905	0.640166
FBgn0040305	0.142088	4.9379	3.05368	0.118966	0.640166
FBgn0036601	1.11885	6.40183	3.11577	0.119005	0.640166
FBgn0264305	-0.136284	4.10795	3.05063	0.119123	0.640462
FBgn0260430	0.776731	3.18843	3.0873	0.119237	0.640652
FBgn0042092	-0.257739	3.09598	3.04686	0.119319	0.640652
FBgn0032059	0.218012	5.07524	3.04628	0.119349	0.640652
FBgn0004924	-0.217243	6.76508	3.04295	0.119522	0.641018
FBgn0002622	0.111251	10.7503	3.04252	0.119544	0.641018
FBgn0033859	-0.14378	4.68248	3.04113	0.119616	0.641065
FBgn0005771	-0.113248	5.84631	3.03681	0.119841	0.641475
FBgn0045866	-0.115419	6.9195	3.03302	0.120039	0.641475
FBgn0038965	0.123098	4.27115	3.03244	0.12007	0.641475
FBgn0032713	0.54504	4.28208	3.05337	0.120116	0.641475
FBgn0037746	0.158514	2.37572	3.03085	0.120153	0.641475
FBgn0000152	0.156965	4.38231	3.03046	0.120173	0.641475
FBgn0033960	0.323225	1.30076	3.03005	0.120195	0.641475
FBgn0035601	-0.134074	7.20244	3.02972	0.120212	0.641475
FBgn0033653	0.127684	3.93074	3.02791	0.120307	0.641475
FBgn0033943	0.323224	1.58016	3.0275	0.120328	0.641475
FBgn0000246	1.01187	2.28476	3.06868	0.120409	0.641568
FBgn0035542	0.269105	5.19935	3.02343	0.120542	0.641756
FBgn0026250	-0.225661	8.4261	3.02279	0.120576	0.641756
FBgn0031458	0.21416	3.38961	3.02166	0.120635	0.641756
FBgn0011822	0.207246	5.12093	3.0162	0.120923	0.642946
FBgn0050404	-0.165945	5.50311	3.01398	0.12104	0.643176
FBgn0033728	0.593467	3.10865	3.0302	0.12113	0.643176
FBgn0062978	0.239771	5.34393	3.01177	0.121157	0.643176
FBgn0032216	-0.256523	6.76737	3.00983	0.121259	0.643382
FBgn0022238	-0.449474	4.67919	3.01708	0.121344	0.643439
FBgn0038725	0.310906	1.75801	3.00712	0.121403	0.643439
FBgn0038678	-0.183604	4.49522	3.00541	0.121494	0.643439
FBgn0027496	-0.130463	6.01049	3.00482	0.121525	0.643439
FBgn0051439	0.445293	5.78403	3.01117	0.121823	0.644462
FBgn0021750	-0.156864	4.3625	2.99661	0.121963	0.644462
FBgn0019932	0.379276	5.47412	2.99648	0.12197	0.644462
FBgn0031119	-0.578612	4.34499	3.02166	0.122031	0.644462
FBgn0011706	0.307629	0.31633	2.99474	0.122062	0.644462
FBgn0030798	-1.14265	3.66707	3.05342	0.122175	0.644462
FBgn0029662	-0.468833	5.51183	3.00779	0.122217	0.644462
FBgn0028436	-0.170646	3.38198	2.98954	0.122341	0.644462
FBgn0038476	-0.204028	3.87065	2.98804	0.122421	0.644462
FBgn0004009	-0.291763	3.02057	2.9861	0.122525	0.644462
FBgn0038828	-0.318772	0.770684	2.98465	0.122603	0.644462
FBgn0050289	-0.291125	4.0358	2.98446	0.122613	0.644462
FBgn0037780	0.156601	4.01018	2.98382	0.122648	0.644462
FBgn0035039	-0.641582	5.26745	3.02173	0.122679	0.644462
FBgn0039325	-0.31989	5.45913	2.98283	0.122701	0.644462
FBgn0033236	-0.133775	4.68252	2.98211	0.12274	0.644462
FBgn0038465	0.432362	6.37645	2.98585	0.122841	0.644654
FBgn0262734	-0.220481	6.9032	2.97906	0.122904	0.644654
FBgn0038809	0.104999	4.86206	2.97692	0.123019	0.644803
FBgn0040382	0.241608	4.80194	2.97548	0.123097	0.644803
FBgn0036763	-0.120632	5.35546	2.97499	0.123124	0.644803
FBgn0027091	-0.180371	6.22063	2.97204	0.123283	0.645304
FBgn0010380	-0.163104	6.57547	2.96754	0.123527	0.646246
FBgn0037710	-0.151374	4.85348	2.96506	0.123662	0.646495
FBgn0010905	-0.268473	6.02068	2.96307	0.12377	0.646495
FBgn0028734	-0.323523	5.72574	2.96016	0.123929	0.646495
FBgn0005278	0.250208	8.85756	2.95844	0.124022	0.646495
FBgn0025725	-0.223479	7.78007	2.95731	0.124084	0.646495
FBgn0010358	0.234146	8.70455	2.95697	0.124103	0.646495
FBgn0031492	-0.23023	4.54283	2.95689	0.124107	0.646495
FBgn0020312	-0.144618	4.46849	2.95677	0.124113	0.646495
FBgn0037472	0.148494	4.00759	2.95539	0.124189	0.646495
FBgn0039648	-0.973533	2.31283	2.99458	0.124226	0.646495
FBgn0035872	-0.232963	5.84325	2.95188	0.124381	0.646495
FBgn0001565	0.247327	5.81754	2.95162	0.124395	0.646495
FBgn0004782	0.615082	4.29447	2.97997	0.124474	0.646495
FBgn0001122	-0.232779	4.92419	2.9484	0.124572	0.646495
FBgn0035771	-0.223294	7.49354	2.94793	0.124597	0.646495
FBgn0264978	-0.168628	6.069	2.9479	0.124599	0.646495
FBgn0033134	0.476192	5.60007	2.96388	0.124702	0.646674
FBgn0039581	-0.208909	5.44824	2.94449	0.124787	0.646674
FBgn0016693	-0.119345	7.82163	2.94378	0.124826	0.646674
FBgn0029894	-0.191369	3.45481	2.94204	0.124922	0.646838
FBgn0032361	0.149271	3.44087	2.93737	0.125179	0.647722
FBgn0039943	-0.19609	4.01781	2.93662	0.125221	0.647722
FBgn0261955	-0.233193	8.64336	2.93522	0.125298	0.647791
FBgn0027079	-0.280905	7.46286	2.93298	0.125422	0.648098
FBgn0031034	0.607773	7.05603	2.95678	0.125609	0.64859
FBgn0261524	-0.16997	5.03341	2.92895	0.125646	0.64859
FBgn0011824	-0.25764	4.47731	2.92713	0.125747	0.64876
FBgn0034288	0.384902	8.66012	2.92605	0.125807	0.64876
FBgn0029523	0.216743	1.03694	3.25545	0.1263	0.649946
FBgn0015036	-0.172529	3.13326	2.91639	0.126345	0.649946
FBgn0085364	0.713167	9.19046	2.96514	0.126356	0.649946
FBgn0261593	0.146853	9.47969	2.91582	0.126377	0.649946
FBgn0040262	-0.222584	4.66221	2.91508	0.126419	0.649946
FBgn0035674	0.30959	5.08939	2.91474	0.126437	0.649946
FBgn0033983	-0.586064	1.73228	2.91223	0.126578	0.649946
FBgn0024734	-0.137127	7.86674	2.91179	0.126603	0.649946
FBgn0266581	-0.247073	5.79126	2.90999	0.126703	0.649946
FBgn0038376	-0.0974275	6.39385	2.90843	0.126791	0.649946
FBgn0260026	0.250946	2.93252	2.90801	0.126815	0.649946
FBgn0004003	0.462696	4.27457	2.91821	0.126879	0.649946
FBgn0082966	0.698998	3.0966	2.93135	0.126947	0.649946
FBgn0038788	0.154292	4.48694	2.90531	0.126967	0.649946
FBgn0261341	-0.415835	10.3993	2.91858	0.127091	0.649946
FBgn0250786	-0.152129	6.31668	2.9028	0.127108	0.649946
FBgn0033079	-0.259673	5.95359	2.90138	0.127188	0.649946
FBgn0027080	-0.139481	6.77649	2.90125	0.127196	0.649946
FBgn0030693	0.103766	5.85948	2.89764	0.127399	0.65031
FBgn0263466	0.424008	0.645956	2.89576	0.127505	0.65031
FBgn0004852	-0.135544	6.74309	2.89569	0.12751	0.65031
FBgn0034389	-0.439925	3.52321	2.89489	0.127555	0.65031
FBgn0083007	0.563333	3.55833	2.91374	0.127589	0.65031
FBgn0037753	-1.10128	3.56324	2.94918	0.127732	0.650408
FBgn0036627	0.210869	2.98232	2.89168	0.127737	0.650408
FBgn0265629	-0.284793	0.48769	2.8847	0.128134	0.65138
FBgn0031266	-0.177147	5.92555	2.88387	0.128181	0.65138
FBgn0035632	-0.0944223	5.80713	2.88356	0.128199	0.65138
FBgn0040250	0.226939	3.17704	2.88003	0.1284	0.65138
FBgn0029755	-0.16061	4.00416	2.87992	0.128406	0.65138
FBgn0033989	-0.120761	6.09547	2.87987	0.128409	0.65138
FBgn0032911	0.371753	1.48848	2.87807	0.128512	0.65138
FBgn0035370	-0.184749	5.86148	2.87777	0.128529	0.65138
FBgn0032195	-0.14816	4.71557	2.87664	0.128594	0.65138
FBgn0036872	1.03132	6.12481	2.93017	0.128781	0.65138
FBgn0052284	0.731965	4.26847	2.91636	0.128881	0.65138
FBgn0036336	0.14518	3.75902	2.87081	0.128928	0.65138
FBgn0033351	-0.154171	5.28584	2.87055	0.128943	0.65138
FBgn0015799	-0.17965	5.58764	2.8704	0.128952	0.65138
FBgn0040394	-0.137152	4.69169	2.86867	0.129051	0.65138
[truncated: 8,099 more rows]

## Sheet: All genes S–Lh vs. S+Lh T1
Differential expression analysis: Result of edgeR corresponding to the S–Lh vs. S+Lh comparision at T1 (24 hours post wasp attack). log2FC is reported
Gene_id	logFC	logCPM	F	PValue	FDR
FBgn0019660	-8.87504	5.87506	644.338	9.25824e-09	9.336e-05
FBgn0036809	-6.53935	0.696312	235.15	3.99562e-07	0.00201459
FBgn0030667	-5.29601	0.740603	141.411	2.8778e-06	0.00638935
FBgn0083058	-2.0494	6.54655	138.175	2.92373e-06	0.00638935
FBgn0038277	-2.81741	1.55206	133.342	3.33937e-06	0.00638935
FBgn0031296	-5.51646	1.47376	131.899	3.85199e-06	0.00638935
FBgn0034837	-6.32179	1.90274	126.941	4.43529e-06	0.00638935
FBgn0035608	-5.11915	1.97067	117.931	5.81078e-06	0.00649
FBgn0019661	-2.44393	8.52691	114.005	5.97618e-06	0.00649
FBgn0262104	-6.95706	-0.0740654	112.658	6.72605e-06	0.00649
FBgn0034435	-7.09851	1.59152	111.73	7.07953e-06	0.00649
FBgn0086666	-1.44294	5.31589	100.042	9.6711e-06	0.0077035
FBgn0083015	-1.50401	4.06766	99.3213	9.93112e-06	0.0077035
FBgn0038612	-2.77576	-0.0548957	91.3921	1.34633e-05	0.0095723
FBgn0034998	-5.1051	-0.0215738	91.6756	1.42388e-05	0.0095723
FBgn0028852	-8.23937	-0.341185	277.082	1.81475e-05	0.0104261
FBgn0082963	-1.64149	3.31719	83.7839	1.84663e-05	0.0104261
FBgn0083041	-2.05785	3.10351	84.3051	1.86106e-05	0.0104261
FBgn0013813	-2.77807	0.101673	79.5508	2.22744e-05	0.0118219
FBgn0034822	-8.85013	0.223129	244.196	2.4909e-05	0.0121703
FBgn0265089	-6.16397	-0.10398	77.7763	2.61586e-05	0.0121703
FBgn0026175	-5.28466	-0.136643	77.3892	2.65516e-05	0.0121703
FBgn0035727	-4.14044	0.121248	76.1094	2.77695e-05	0.0121751
FBgn0029754	-3.7215	-0.0583702	74.0684	3.00219e-05	0.0122983
FBgn0083040	-2.04256	6.1265	73.2853	3.13957e-05	0.0122983
FBgn0086672	-1.64331	7.33225	71.3723	3.2891e-05	0.0122983
FBgn0002962	-2.5425	0.062586	71.3494	3.29288e-05	0.0122983
FBgn0039129	-3.24164	0.932075	61.1646	6.09974e-05	0.0219678
FBgn0038191	-2.68656	0.305222	57.5537	7.22745e-05	0.0251316
FBgn0082922	-1.53837	6.0515	51.4213	0.000106795	0.0357283
FBgn0052259	-4.11787	0.227029	51.5863	0.000109835	0.0357283
FBgn0030647	-5.01462	0.73941	50.9645	0.000114484	0.0360767
FBgn0086669	-1.43324	2.82328	49.3319	0.000120756	0.0369001
FBgn0267520	-11.7219	12.3878	48.275	0.000137695	0.0408387
FBgn0036224	-8.63189	0.0170385	120.677	0.000147392	0.0424658
FBgn0035571	-3.66346	0.54604	45.2942	0.000170799	0.0478022
FBgn0083010	-1.26809	4.72949	44.2389	0.000175395	0.0478022
FBgn0083005	-1.6024	2.64712	43.5828	0.000188583	0.0500439
FBgn0262598	-3.5819	0.080471	43.6011	0.00019411	0.05019
FBgn0000146	-1.8865	1.71313	42.6943	0.000202989	0.0511736
FBgn0083008	-1.58327	1.59983	41.7792	0.000212663	0.0523048
FBgn0031623	-1.84112	1.01209	40.7155	0.000233769	0.0561267
FBgn0263488	-1.87758	4.39458	40.6749	0.000244703	0.0573856
FBgn0085737	-7.06851	2.27194	40.1395	0.000255691	0.0585997
FBgn0083003	-1.25518	3.99384	35.5665	0.000369823	0.0828732
FBgn0083000	-1.64726	1.34716	33.2776	0.00045797	0.100395
FBgn0013685	4.44698	5.24791	32.1016	0.000529264	0.113555
FBgn0083047	-1.22017	4.00724	31.542	0.000548169	0.114051
FBgn0083004	-1.70416	4.05326	31.6422	0.000554194	0.114051
FBgn0040534	-0.708237	4.50183	30.2039	0.000614794	0.123992
FBgn0029866	0.586833	4.36837	29.3745	0.000671849	0.132842
FBgn0052971	-4.19379	0.150635	28.7864	0.000747438	0.144945
FBgn0013688	3.00138	8.0043	28.5867	0.000763911	0.145345
FBgn0263974	-1.22743	1.14268	27.8514	0.000795093	0.148476
FBgn0025641	0.734837	5.50589	27.395	0.000837459	0.152842
FBgn0013683	5.19834	5.19789	27.6253	0.000849994	0.152842
FBgn0266139	-1.14599	0.260147	27.1242	0.000863941	0.152842
FBgn0013672	2.50344	10.2328	27.2941	0.00088245	0.153425
FBgn0013681	3.59634	4.524	26.8578	0.000927624	0.158545
FBgn0083121	-1.30636	0.18849	25.955	0.000991127	0.164298
FBgn0032089	-2.3432	0.545531	26.2643	0.000993868	0.164298
FBgn0082954	-0.993732	1.41313	25.7756	0.00101267	0.164706
FBgn0086658	-1.196	3.48821	25.7587	0.00104304	0.166952
FBgn0086665	-0.776025	2.92066	24.9689	0.00111717	0.176025
FBgn0083054	-1.05844	3.34616	24.4569	0.00120757	0.187341
FBgn0037742	-1.44955	0.738564	24.2068	0.00123791	0.189137
FBgn0026169	-1.38697	8.10796	24.1345	0.00126838	0.190901
FBgn0010258	-3.15717	0.483637	24.0892	0.00129402	0.191895
FBgn0020907	-0.560063	4.66055	23.511	0.00134287	0.196254
FBgn0266710	-1.65297	0.398305	23.0147	0.00146023	0.210356
FBgn0086671	-1.62719	3.97082	22.9485	0.00149742	0.212676
FBgn0004183	-1.35202	2.19238	22.1354	0.00165477	0.230449
FBgn0013684	2.35232	9.60421	22.1317	0.00166827	0.230449
FBgn0004191	-1.35881	6.93535	21.8548	0.00172676	0.233521
FBgn0083039	-0.901987	2.08997	21.5848	0.00173682	0.233521
FBgn0030195	1.03886	0.299841	21.197	0.00183303	0.243215
FBgn0082973	-1.23844	2.30956	21.0543	0.00191163	0.250349
FBgn0083027	-1.13853	5.86267	20.945	0.00195388	0.252601
FBgn0040007	-0.995338	9.59574	20.4958	0.00202464	0.258436
FBgn0001253	1.25794	6.00079	19.9861	0.00225011	0.283626
FBgn0082983	-1.21881	2.86514	19.8455	0.00229051	0.285154
FBgn0032681	0.735005	2.83408	19.4558	0.00235771	0.288821
FBgn0086601	-0.900627	0.725871	19.3346	0.00240086	0.288821
FBgn0013680	3.39021	6.94679	19.4962	0.00241737	0.288821
FBgn0083120	-0.855975	1.34996	19.242	0.00243453	0.288821
FBgn0002534	-1.34502	9.47146	19.2778	0.0024801	0.29
FBgn0082974	-1.27769	0.77337	19.1048	0.00250198	0.29
FBgn0085822	-4.73657	5.48924	18.9475	0.0026238	0.300664
FBgn0082979	-1.2169	2.68354	18.7358	0.00270555	0.306548
FBgn0005616	-0.873237	3.5885	18.107	0.00292983	0.328272
FBgn0263459	-1.06098	2.77071	17.7188	0.00314277	0.34826
FBgn0083035	-1.64753	0.655628	17.5594	0.00325391	0.353625
FBgn0051810	-1.13985	0.487332	17.3717	0.00326132	0.353625
FBgn0083042	-1.45539	0.689	17.2162	0.0034124	0.364448
FBgn0262952	2.15663	9.14135	17.1906	0.00345371	0.364448
FBgn0082999	-1.12944	2.24006	17.1082	0.00346956	0.364448
FBgn0083049	-1.05587	1.32025	16.885	0.00354159	0.368179
FBgn0037852	0.434508	4.58868	16.7644	0.00360388	0.370832
FBgn0082997	0.763558	0.333092	16.679	0.00365562	0.372356
FBgn0083011	-1.17783	1.63751	16.5627	0.00378765	0.381947
FBgn0039091	-0.791534	7.06464	16.2893	0.00390398	0.384836
FBgn0085799	-4.31911	6.96685	16.4318	0.00391382	0.384836
FBgn0036485	-0.620329	2.57762	16.2491	0.00393079	0.384836
FBgn0083053	-0.970217	2.69169	16.0429	0.00412938	0.400391
FBgn0083009	-0.937782	0.738557	15.6334	0.00437193	0.419872
FBgn0030660	-0.782003	1.98979	15.522	0.00445828	0.422828
FBgn0032821	0.479779	5.51048	15.4572	0.00450952	0.422828
FBgn0250816	-0.853879	1.98694	15.4067	0.00454989	0.422828
FBgn0259936	-0.884036	3.41054	15.4623	0.00457043	0.422828
FBgn0038761	-0.629818	2.69505	15.0752	0.00482698	0.442502
FBgn0085813	-7.07306	7.46233	15.048	0.00497151	0.451646
FBgn0042092	-0.657068	2.68882	14.8434	0.00503343	0.453189
FBgn0085758	-2.21455	1.80204	14.5187	0.0054703	0.484629
FBgn0023170	-0.920321	10.0154	14.3998	0.00547874	0.484629
FBgn0085192	-0.666462	3.62778	14.2211	0.00564538	0.490192
FBgn0039740	0.608486	1.18749	14.192	0.00567616	0.490192
FBgn0004186	-0.972998	0.589537	14.1814	0.00568747	0.490192
FBgn0031033	-1.61927	1.07214	14.139	0.00586757	0.501429
FBgn0083018	-1.78812	1.60671	14.059	0.00595577	0.504689
FBgn0052529	0.542883	5.66552	13.5941	0.00635972	0.532851
FBgn0039316	-1.11125	6.89638	13.6832	0.00639379	0.532851
FBgn0261791	-0.395281	4.62206	13.3454	0.00667454	0.551689
FBgn0013678	1.29138	10.8291	13.3035	0.00687835	0.561131
FBgn0264449	0.597856	4.6809	13.1761	0.00690006	0.561131
FBgn0027495	0.4676	4.00749	13.0623	0.007057	0.566674
FBgn0051104	-0.902914	3.91771	13.1015	0.0071479	0.566674
FBgn0263481	-1.00764	0.409301	12.9767	0.00717808	0.566674
FBgn0052071	-3.1434	1.66269	13.0746	0.007193	0.566674
FBgn0030925	0.625893	4.72891	12.9135	0.00726924	0.56824
FBgn0004198	0.822253	5.11423	12.9085	0.00737421	0.572012
FBgn0265590	0.818325	2.02527	12.7688	0.00749565	0.574647
FBgn0003396	0.65548	6.07509	12.7431	0.00752216	0.574647
FBgn0083050	-0.534076	2.88249	12.6141	0.007721	0.585403
FBgn0038928	-0.402127	2.83648	12.3987	0.00806824	0.603224
FBgn0086603	-1.45918	4.87175	12.4606	0.0081318	0.603224
FBgn0034071	0.44699	5.32032	12.3531	0.0081442	0.603224
FBgn0050089	0.974762	3.1226	12.4223	0.00819532	0.603224
FBgn0083007	-1.0059	3.41083	12.2568	0.00847718	0.617007
FBgn0002941	0.742777	0.496253	12.1183	0.00855015	0.617007
FBgn0039315	-1.15391	4.74617	12.1802	0.00861195	0.617007
FBgn0086027	-1.15623	1.20499	12.15	0.00862733	0.617007
FBgn0267336	0.721433	6.36822	12.0245	0.00874816	0.621242
FBgn0065064	-1.29131	7.88458	11.8568	0.00921103	0.649539
FBgn0031054	0.401391	4.09793	11.6715	0.00939557	0.65559
FBgn0001122	0.698957	5.20808	11.6534	0.00948997	0.65559
FBgn0015299	-0.39711	4.41222	11.5672	0.00960805	0.65559
FBgn0264270	0.784711	6.972	11.5841	0.00961803	0.65559
FBgn0032286	0.661537	6.63286	11.5605	0.00962191	0.65559
FBgn0031361	-0.349989	3.53124	11.3763	0.0100128	0.677531
FBgn0267505	2.47689	0.846701	11.4331	0.0100783	0.677531
FBgn0010620	0.349858	5.75569	11.2346	0.0103271	0.686489
FBgn0031887	-0.720056	0.0633122	11.2255	0.0103477	0.686489
FBgn0082978	-1.16407	3.17229	11.1687	0.010672	0.703378
FBgn0025111	-0.749025	2.13624	11.0386	0.0107981	0.707067
FBgn0025633	0.910358	5.36751	11.0547	0.0109417	0.710939
FBgn0082967	-1.12682	3.60911	11.0313	0.0109983	0.710939
FBgn0086662	-0.977253	1.72011	10.9715	0.0110836	0.711892
FBgn0003390	1.06122	3.28267	10.9157	0.0112823	0.719225
FBgn0063497	-0.430142	7.35401	10.8124	0.0113404	0.719225
FBgn0038680	-0.433843	4.24509	10.7277	0.0115587	0.723813
FBgn0022768	0.37096	5.09472	10.7162	0.0115886	0.723813
FBgn0261090	-0.593349	1.73193	10.6798	0.0116844	0.723813
FBgn0015558	0.468001	3.7556	10.674	0.0116999	0.723813
FBgn0267516	-1.8491	2.02438	10.724	0.0117743	0.723978
FBgn0263485	-0.885639	0.560933	10.511	0.012147	0.738671
FBgn0023541	-1.45201	4.21633	10.5808	0.0121598	0.738671
FBgn0038451	-1.73601	0.994075	10.5054	0.0123693	0.741714
FBgn0261244	0.346091	4.47164	10.3793	0.012514	0.741714
FBgn0004426	-0.533082	6.4937	10.2614	0.01286	0.741714
FBgn0002939	-1.40011	6.02422	10.2373	0.0131517	0.741714
FBgn0082994	-1.27424	2.14574	10.0997	0.0135775	0.741714
FBgn0034570	0.650727	4.20752	10.0428	0.0136185	0.741714
FBgn0034958	0.59894	4.89407	9.91185	0.0139765	0.741714
FBgn0036847	-0.377265	4.58705	9.81997	0.0142669	0.741714
FBgn0003255	0.69247	1.93872	9.81963	0.014268	0.741714
FBgn0037100	-0.588276	1.26507	9.8029	0.0143251	0.741714
FBgn0083973	0.908106	0.638931	9.79459	0.0143948	0.741714
FBgn0262740	0.841187	5.02238	9.66712	0.0150355	0.741714
FBgn0037008	-0.596181	3.78419	9.61213	0.0150404	0.741714
FBgn0263504	1.10776	0.486589	9.64034	0.0150646	0.741714
FBgn0082981	-0.929701	0.489674	9.48161	0.0155279	0.741714
FBgn0065055	-0.859404	1.78964	9.49844	0.0155525	0.741714
FBgn0038646	0.478571	4.99361	9.45726	0.0155714	0.741714
FBgn0265652	-1.13275	3.50466	9.49708	0.0156627	0.741714
FBgn0031118	0.807018	5.58584	9.47703	0.0157389	0.741714
FBgn0036964	-0.399498	3.94491	9.39174	0.0158229	0.741714
FBgn0030330	0.474251	4.01743	9.3362	0.0160401	0.741714
FBgn0029840	0.429118	4.97032	9.33206	0.0160565	0.741714
FBgn0024985	0.823187	4.1118	9.2602	0.0165929	0.741714
FBgn0085819	-4.90942	8.19829	9.2428	0.0166639	0.741714
FBgn0043903	0.512556	5.07354	9.15899	0.0167589	0.741714
FBgn0029801	0.636426	4.26812	9.17457	0.0168032	0.741714
FBgn0261933	-0.391623	4.699	9.11861	0.0169284	0.741714
FBgn0052676	0.712932	6.18903	9.15437	0.0169363	0.741714
FBgn0033458	0.620311	3.02609	9.05816	0.0172282	0.741714
FBgn0263468	-0.859667	3.37932	9.04563	0.0174967	0.741714
FBgn0034598	0.488238	5.15356	8.96594	0.017589	0.741714
FBgn0263934	1.02999	3.95664	9.01648	0.0176243	0.741714
FBgn0030625	0.386562	3.81847	8.92365	0.0177778	0.741714
FBgn0031568	0.918638	2.78267	8.95692	0.0178886	0.741714
FBgn0030545	0.679537	3.83551	8.87781	0.0181698	0.741714
FBgn0036714	-0.60551	3.87262	8.82916	0.0183082	0.741714
FBgn0053774	-0.522106	4.47999	8.79562	0.018365	0.741714
FBgn0032450	-0.433216	3.79754	8.78433	0.018418	0.741714
FBgn0261570	0.744277	5.64115	8.72924	0.0189409	0.741714
FBgn0003963	0.674885	3.72399	8.6836	0.0190884	0.741714
FBgn0085807	-3.99445	2.39127	8.62641	0.0194504	0.741714
FBgn0263873	0.490121	5.33211	8.57084	0.0194568	0.741714
FBgn0035896	-0.552041	5.22731	8.54454	0.0196115	0.741714
FBgn0262567	-0.664048	2.26772	8.52443	0.0197323	0.741714
FBgn0082995	-1.04274	2.93222	8.56207	0.0197744	0.741714
FBgn0265575	1.94041	5.19391	8.55653	0.0198025	0.741714
FBgn0262526	-1.55567	0.0593577	8.54953	0.0198383	0.741714
FBgn0259734	0.341127	5.26219	8.48473	0.0198967	0.741714
FBgn0261790	-0.501217	4.53982	8.45918	0.0200297	0.741714
FBgn0039240	0.463484	5.14817	8.43978	0.0201314	0.741714
FBgn0014343	0.516905	3.01192	8.43934	0.0201338	0.741714
FBgn0053977	-0.445756	3.33436	8.38013	0.0204483	0.741714
FBgn0052656	1.19779	5.78206	8.41655	0.0205327	0.741714
FBgn0004102	0.541576	2.77372	8.26033	0.0211039	0.741714
FBgn0027621	0.535695	4.61947	8.23475	0.0212645	0.741714
FBgn0003377	9.87584	9.92838	8.25611	0.021412	0.741714
FBgn0015277	0.684956	3.94696	8.24373	0.0214306	0.741714
FBgn0086668	-0.555641	2.73529	8.19242	0.0214875	0.741714
FBgn0031850	0.428417	4.03611	8.16176	0.0216635	0.741714
FBgn0260226	10.0776	9.65752	8.18936	0.021792	0.741714
FBgn0264562	1.43208	5.19228	8.16607	0.0219265	0.741714
FBgn0052296	0.406036	5.37054	8.11241	0.0219507	0.741714
FBgn0262021	-0.67162	3.15203	8.13411	0.0220046	0.741714
FBgn0034946	0.33731	3.5722	8.09687	0.0220421	0.741714
FBgn0031816	0.405143	4.65948	8.07473	0.0221733	0.741714
FBgn0027343	0.557462	3.22209	8.07526	0.0221952	0.741714
FBgn0029924	0.751529	5.4173	8.11659	0.022216	0.741714
FBgn0264502	0.937692	2.84727	8.10709	0.0222721	0.741714
FBgn0039296	-0.653966	3.65279	8.05889	0.0224732	0.741714
FBgn0039299	7.17141	6.91406	8.04361	0.0226518	0.741714
FBgn0039319	-1.37295	4.59165	8.01789	0.022808	0.741714
FBgn0051344	0.360534	4.49829	7.96978	0.0228084	0.741714
FBgn0002565	9.59148	11.6841	8.00679	0.0228758	0.741714
FBgn0038721	-0.899943	4.01651	7.99677	0.0229373	0.741714
FBgn0038874	0.970882	2.01603	7.99501	0.0229481	0.741714
FBgn0042650	0.694802	3.38276	7.94945	0.0231644	0.741714
FBgn0029893	0.507344	5.17987	7.90884	0.0231878	0.741714
FBgn0266411	0.450355	7.28575	7.90707	0.023199	0.741714
FBgn0000640	9.34868	10.1689	7.91489	0.0234473	0.741714
FBgn0031488	0.416496	2.99417	7.84862	0.0235706	0.741714
FBgn0050055	-0.610553	3.53678	7.80726	0.0239993	0.741714
FBgn0082966	-1.02034	2.99695	7.81946	0.0240601	0.741714
FBgn0086600	-0.594493	1.62947	7.76039	0.0241461	0.741714
FBgn0035675	-0.440025	3.47085	7.7601	0.024148	0.741714
FBgn0083987	-0.883624	6.98151	7.7923	0.0242383	0.741714
FBgn0034856	4.96362	5.37208	7.72854	0.0246631	0.741714
FBgn0033749	-0.615069	2.21707	7.67388	0.0247518	0.741714
FBgn0026679	0.343573	4.04447	7.64215	0.0249456	0.741714
FBgn0023506	0.603568	2.77013	7.64258	0.0250178	0.741714
FBgn0040958	-0.617577	7.6746	7.60614	0.0252124	0.741714
FBgn0086667	-1.12349	5.46918	7.63018	0.0253371	0.741714
FBgn0031168	1.13507	0.672443	7.62911	0.0253446	0.741714
FBgn0034693	0.561161	5.47854	7.55092	0.025703	0.741714
FBgn0263490	0.420322	5.28816	7.53386	0.0257075	0.741714
FBgn0027586	-0.959395	4.17612	7.56764	0.0257779	0.741714
FBgn0085789	-0.717833	0.214586	7.51597	0.0258361	0.741714
FBgn0261383	0.589903	4.83346	7.51969	0.0259449	0.741714
FBgn0039428	-0.656576	2.59639	7.5133	0.0260061	0.741714
FBgn0038462	-0.522399	4.71387	7.49445	0.0260166	0.741714
FBgn0039124	-1.6171	0.783711	7.52411	0.0260906	0.741714
FBgn0000639	9.50453	12.1071	7.50865	0.0262027	0.741714
FBgn0030048	-0.371176	3.48716	7.45803	0.0262586	0.741714
FBgn0010041	-1.32843	4.3651	7.48679	0.0263624	0.741714
FBgn0003375	9.43669	9.30758	7.47147	0.0264751	0.741714
FBgn0263346	0.394432	6.75342	7.42225	0.0265239	0.741714
FBgn0004050	0.436962	4.15159	7.41547	0.0265745	0.741714
FBgn0260008	-1.17554	8.02946	7.45435	0.0266017	0.741714
FBgn0028664	0.355384	4.09188	7.38828	0.0267789	0.741714
FBgn0040985	0.438844	5.12555	7.38658	0.0267917	0.741714
FBgn0004655	0.586823	4.9188	7.40438	0.0268043	0.741714
FBgn0000221	0.389459	2.38028	7.37905	0.0268487	0.741714
FBgn0015024	0.556025	6.66978	7.32847	0.0272542	0.741714
FBgn0033500	-0.660031	0.31048	7.31667	0.0273267	0.741714
FBgn0032032	-0.336754	3.26998	7.27753	0.0276321	0.741714
FBgn0037876	0.442076	1.28525	7.26621	0.0277213	0.741714
FBgn0034624	-1.70744	0.709016	7.29274	0.0278355	0.741714
FBgn0262945	-0.787592	4.24481	7.27503	0.0279751	0.741714
FBgn0265726	4.56709	5.84191	7.27447	0.0279795	0.741714
FBgn0017581	0.575712	8.46949	7.23109	0.0280002	0.741714
FBgn0000003	-4.50753	8.61317	7.26589	0.0280476	0.741714
FBgn0261461	0.760431	5.03801	7.25061	0.0281691	0.741714
FBgn0037313	0.386223	5.45543	7.1806	0.0284075	0.741714
FBgn0029912	0.390517	4.30958	7.17027	0.0284918	0.741714
FBgn0030608	0.45318	7.13699	7.16938	0.028499	0.741714
FBgn0265512	1.73612	3.95947	7.20591	0.0285286	0.741714
FBgn0025681	0.336998	5.5303	7.11904	0.0289143	0.741714
FBgn0031683	-0.32539	4.51766	7.09206	0.02914	0.741714
FBgn0037083	4.30315	5.72	7.11796	0.0292532	0.741714
FBgn0030266	0.894076	4.94644	7.1155	0.0292738	0.741714
FBgn0038065	0.655115	5.48174	7.09004	0.0294529	0.741714
FBgn0016726	-0.59656	9.81713	7.04195	0.0295653	0.741714
FBgn0002562	7.74631	10.6313	7.07589	0.0296081	0.741714
FBgn0052666	0.295395	5.71571	7.03636	0.0296132	0.741714
FBgn0058002	-0.888032	4.6553	7.07483	0.0296171	0.741714
FBgn0033137	5.51303	4.69361	7.072	0.0296412	0.741714
FBgn0036410	3.26341	4.86918	7.06487	0.029702	0.741714
FBgn0053144	0.82275	5.5352	7.04852	0.0298419	0.741714
FBgn0263002	-1.12564	2.78735	7.04073	0.0299089	0.741714
FBgn0029885	-0.375636	4.15112	7.00085	0.0299199	0.741714
FBgn0030503	0.454056	4.3075	6.99753	0.0299488	0.741714
FBgn0039685	7.97491	9.91485	7.02798	0.0300189	0.741714
FBgn0027334	0.525522	1.78054	6.97963	0.0301051	0.741714
FBgn0033872	-0.562778	4.47336	6.98683	0.0301873	0.741714
FBgn0038717	-1.25271	2.40127	6.99779	0.0302816	0.741714
FBgn0022029	0.678554	6.00975	6.98998	0.0303378	0.741714
FBgn0030049	0.498696	5.36723	6.95415	0.0303628	0.741714
FBgn0038080	-0.29674	4.62359	6.9502	0.0303645	0.741714
FBgn0052407	-1.16238	3.89347	6.98695	0.0303766	0.741714
FBgn0034804	0.829507	1.8752	6.97932	0.0304277	0.741714
FBgn0085443	0.676942	5.68407	6.96765	0.0305467	0.741714
FBgn0033205	-0.653761	5.85718	6.93138	0.0308412	0.741714
FBgn0030101	0.320388	4.1219	6.8941	0.0308667	0.741714
FBgn0030645	0.359071	1.73173	6.87804	0.0310125	0.741714
FBgn0264443	0.516775	3.126	6.8801	0.0310203	0.741714
FBgn0032433	-0.421601	6.21666	6.86806	0.0311034	0.741714
FBgn0031377	0.596208	2.96558	6.87909	0.0311562	0.741714
FBgn0015321	0.603873	4.57367	6.88078	0.0312085	0.741714
FBgn0004370	0.405482	6.78651	6.85496	0.0312234	0.741714
FBgn0034643	0.300609	5.32578	6.80051	0.0317284	0.741714
FBgn0030362	-0.466076	8.99422	6.7971	0.0317604	0.741714
FBgn0015402	0.541774	4.17414	6.8048	0.0318341	0.741714
FBgn0025455	0.730968	5.23322	6.80707	0.0320103	0.741714
FBgn0000210	4.42432	7.41819	6.79396	0.0321336	0.741714
FBgn0259242	0.389893	1.67642	6.75562	0.0321525	0.741714
FBgn0032775	-0.356879	3.88608	6.7385	0.0323162	0.741714
FBgn0036320	-0.786906	4.12783	6.76559	0.0324028	0.741714
FBgn0033725	4.04783	8.72056	6.71691	0.0328713	0.741714
FBgn0039733	0.632339	2.27635	6.68282	0.0329872	0.741714
FBgn0263144	0.282531	6.06531	6.64928	0.0331864	0.741714
FBgn0053558	0.347525	4.55278	6.6452	0.033227	0.741714
FBgn0065035	-0.308941	3.56711	6.62652	0.0334132	0.741714
FBgn0041780	-0.660921	0.24826	6.62203	0.0334581	0.741714
FBgn0085320	-0.761109	8.44161	6.63469	0.0336044	0.741714
FBgn0037345	-0.403635	1.40735	6.60682	0.033611	0.741714
FBgn0016641	0.395256	4.30774	6.60177	0.033662	0.741714
FBgn0065046	-0.915414	4.93318	6.63339	0.0336954	0.741714
FBgn0030913	0.96958	0.29907	6.60713	0.0338817	0.741714
FBgn0265499	-0.524749	0.973312	6.57441	0.0339398	0.741714
FBgn0038083	-0.931034	6.61204	6.60615	0.03397	0.741714
FBgn0032663	-0.376016	2.82786	6.56636	0.0340221	0.741714
FBgn0039688	1.33031	5.7921	6.59697	0.0340631	0.741714
FBgn0034292	0.263331	5.85825	6.55249	0.0341645	0.741714
FBgn0050343	-0.632588	0.169772	6.54078	0.0342853	0.741714
FBgn0010040	-1.30298	2.97444	6.57104	0.034328	0.741714
FBgn0028396	4.8213	4.62182	6.53671	0.0346826	0.741714
FBgn0262028	-0.331015	2.77518	6.49404	0.034773	0.741714
FBgn0063127	3.65615	2.83723	6.51427	0.034917	0.741714
FBgn0052249	5.68675	5.52927	6.50038	0.0350631	0.741714
FBgn0053116	-0.452826	4.45545	6.46306	0.0351011	0.741714
FBgn0000376	1.03584	2.29261	6.48893	0.0351841	0.741714
FBgn0085430	1.31461	5.87759	6.48253	0.0352521	0.741714
FBgn0030183	3.25462	4.21793	6.47874	0.0352923	0.741714
FBgn0039044	-0.392844	2.65275	6.43495	0.0354023	0.741714
FBgn0035975	0.633649	4.22201	6.45983	0.0354773	0.741714
FBgn0029131	0.274248	3.78681	6.42583	0.0355006	0.741714
FBgn0040817	-0.619264	5.23373	6.44828	0.0355611	0.741714
FBgn0013749	-0.515876	7.04782	6.40757	0.0356987	0.741714
FBgn0004595	3.28759	5.57989	6.42535	0.035866	0.741714
FBgn0027508	0.304263	5.57391	6.38438	0.0359523	0.741714
FBgn0004648	0.49253	7.24557	6.36758	0.0361374	0.741714
FBgn0023171	-0.358156	3.72714	6.3573	0.0362514	0.741714
FBgn0030798	1.12017	3.66694	6.38123	0.0363491	0.741714
FBgn0016672	0.704903	2.26413	6.36852	0.0364092	0.741714
FBgn0030671	0.48236	3.6426	6.33553	0.0365471	0.741714
FBgn0039808	0.789444	1.48438	6.35038	0.036611	0.741714
FBgn0037015	-0.41487	1.19128	6.32333	0.036631	0.741714
FBgn0085427	0.512564	5.65944	6.32965	0.0366973	0.741714
FBgn0037368	-0.405386	1.74987	6.28835	0.0370271	0.741714
FBgn0030114	2.94527	4.94029	6.31216	0.0371221	0.741714
FBgn0015039	-0.910237	7.1889	6.30368	0.0372185	0.741714
FBgn0032343	0.753209	1.44713	6.29162	0.0372189	0.741714
FBgn0003888	1.70912	5.00007	6.30275	0.037229	0.741714
FBgn0031022	0.49898	1.97848	6.26617	0.0372812	0.741714
FBgn0082969	-0.915814	0.494597	6.29064	0.0372859	0.741714
FBgn0086695	-0.417124	2.051	6.25286	0.0374348	0.741714
FBgn0039804	-0.451496	4.02953	6.25	0.0374885	0.741714
FBgn0038735	-0.331967	4.68414	6.24618	0.0375121	0.741714
FBgn0005198	0.316518	5.31433	6.2231	0.037781	0.741714
FBgn0261549	0.608217	4.78315	6.24675	0.0377919	0.741714
FBgn0031016	1.65313	4.45986	6.24997	0.0378363	0.741714
FBgn0034903	2.47236	6.20854	6.24971	0.0378392	0.741714
FBgn0035132	0.387716	5.0854	6.21427	0.0378845	0.741714
FBgn0259482	-0.358235	3.69304	6.21338	0.0378949	0.741714
FBgn0035145	0.410245	5.55778	6.19804	0.0380757	0.741714
FBgn0266019	1.41924	6.43699	6.22923	0.0380783	0.741714
FBgn0085408	0.732197	5.57099	6.22234	0.0381591	0.741714
FBgn0030991	0.268757	5.24028	6.18509	0.0382291	0.741714
FBgn0038980	-0.349974	2.41135	6.18406	0.0382414	0.741714
FBgn0261641	0.659259	4.546	6.21497	0.0382459	0.741714
FBgn0014024	0.607226	3.12577	6.19541	0.0383719	0.741714
FBgn0250868	-0.486347	5.07547	6.16742	0.038502	0.741714
FBgn0039633	1.33543	5.43767	6.16912	0.0387911	0.741714
FBgn0014037	0.510826	6.5206	6.13784	0.0388248	0.741714
FBgn0036812	-0.423915	1.79653	6.10967	0.0391385	0.741714
FBgn0263108	0.575048	5.35072	6.12856	0.0391755	0.741714
FBgn0024836	1.1271	5.51187	6.11711	0.0394217	0.741714
FBgn0031023	0.735979	5.5363	6.08851	0.039774	0.741714
FBgn0033460	0.438729	5.96641	6.05115	0.0398633	0.741714
FBgn0000615	-0.613093	3.9309	6.0743	0.0399369	0.741714
FBgn0263476	-0.949261	4.50758	6.0684	0.0400242	0.741714
FBgn0053513	0.499033	1.73227	6.0377	0.0400322	0.741714
FBgn0052251	0.427081	2.85413	6.03438	0.040074	0.741714
FBgn0082986	-0.843886	1.76063	6.05976	0.0401323	0.741714
FBgn0011826	0.364744	4.95531	6.02914	0.0401403	0.741714
FBgn0031107	0.779459	5.87036	6.05285	0.040219	0.741714
FBgn0035150	-0.366211	3.67083	6.02149	0.0402371	0.741714
FBgn0027572	-0.376259	6.85702	6.01339	0.0403399	0.741714
FBgn0039760	-0.42258	7.14631	6.01238	0.0403529	0.741714
FBgn0025456	3.48428	6.25292	6.04126	0.040365	0.741714
FBgn0261617	0.869566	6.5632	6.02586	0.04056	0.741714
FBgn0061356	0.452933	5.68606	5.98881	0.0406839	0.741714
FBgn0052365	0.542901	0.839908	5.96916	0.0409077	0.741714
FBgn0002531	5.11425	7.8898	5.99354	0.0409733	0.741714
FBgn0259789	1.21031	3.98959	5.98156	0.0411279	0.741714
FBgn0035106	0.766949	5.83699	5.97907	0.04116	0.741714
FBgn0003415	1.01031	5.78557	5.96976	0.0412808	0.741714
FBgn0033636	1.17556	6.10309	5.96414	0.0413538	0.741714
FBgn0004192	-1.47869	1.28213	5.9539	0.0414874	0.741714
FBgn0262127	0.594578	4.30936	5.93728	0.0416522	0.741714
FBgn0263994	0.623761	2.89597	5.92063	0.0418403	0.741714
FBgn0029834	0.681963	2.03716	5.91579	0.041872	0.741714
FBgn0030586	3.61901	4.17135	5.91609	0.0419857	0.741714
FBgn0025864	0.554188	6.37445	5.89874	0.0420136	0.741714
FBgn0038470	-0.396303	2.92916	5.87894	0.0420977	0.741714
FBgn0038951	-0.369184	2.32623	5.87105	0.0422039	0.741714
FBgn0085757	-3.26978	2.25489	5.89892	0.0422145	0.741714
FBgn0016754	0.779157	4.69301	5.8881	0.0423594	0.741714
FBgn0264712	1.32192	3.57087	5.88796	0.0423614	0.741714
FBgn0032638	2.27555	5.41211	5.86568	0.042662	0.741714
FBgn0026088	-0.296367	5.75294	5.83615	0.0426775	0.741714
FBgn0004577	2.68742	5.77065	5.86389	0.0426862	0.741714
FBgn0030693	-0.233299	5.81324	5.82083	0.0428876	0.741714
FBgn0030519	-0.361397	8.17542	5.81051	0.0430298	0.741714
FBgn0020378	2.29156	1.95542	5.83197	0.043122	0.741714
FBgn0087008	0.666409	5.96552	5.83023	0.0431458	0.741714
FBgn0038246	0.58535	1.03848	5.80034	0.0431706	0.741714
FBgn0024285	0.373665	5.23322	5.78979	0.0433173	0.741714
FBgn0032597	-0.299859	4.67377	5.78964	0.0433194	0.741714
FBgn0027843	0.442131	5.50968	5.78294	0.0434434	0.741714
FBgn0032069	-1.38659	8.21078	5.80839	0.0434475	0.741714
FBgn0030077	0.48971	3.04637	5.76826	0.0436754	0.741714
FBgn0259171	0.646414	4.9906	5.791	0.0436895	0.741714
FBgn0037975	2.87923	3.24457	5.78136	0.0438246	0.741714
FBgn0083012	-0.599013	0.859623	5.75008	0.0438751	0.741714
FBgn0063449	-0.602345	3.39447	5.76656	0.0439783	0.741714
FBgn0065047	-2.50707	2.32736	5.76339	0.0440775	0.741714
FBgn0032639	2.69091	4.14858	5.75631	0.0441777	0.741714
FBgn0004606	1.38176	3.19848	5.75337	0.0442194	0.741714
FBgn0030756	4.2825	4.61904	5.74269	0.0443712	0.741714
FBgn0031258	0.508118	4.01786	5.72543	0.0444355	0.741714
FBgn0083940	1.58152	2.66848	5.72561	0.0446155	0.741714
FBgn0010303	0.429487	5.55426	5.695	0.0446822	0.741714
FBgn0041582	0.29409	4.92037	5.69017	0.0447342	0.741714
FBgn0083123	-0.76162	4.59917	5.71461	0.0447737	0.741714
FBgn0262109	0.652485	9.51692	5.69799	0.0448311	0.741714
FBgn0032234	-0.272099	3.46549	5.6788	0.0448996	0.741714
FBgn0260745	0.292871	7.14085	5.67751	0.0449184	0.741714
FBgn0265464	0.411645	3.78348	5.67153	0.0450058	0.741714
FBgn0030012	0.40667	1.46166	5.66533	0.0450966	0.741714
FBgn0265937	-0.685196	0.311281	5.66588	0.0451107	0.741714
FBgn0021800	0.983888	2.94791	5.68655	0.0451806	0.741714
FBgn0031976	0.755499	1.25546	5.67296	0.0452767	0.741714
FBgn0023550	1.47225	3.12492	5.67044	0.0454164	0.741714
FBgn0040001	1.59883	7.48356	5.66922	0.0454344	0.741714
FBgn0025639	1.1058	5.20853	5.66689	0.0454686	0.741714
FBgn0043884	0.701291	7.79321	5.66033	0.0454773	0.741714
FBgn0037222	-0.429525	4.34832	5.62627	0.0456878	0.741714
FBgn0033978	-1.45422	7.11467	5.6425	0.045829	0.741714
FBgn0037288	-1.04117	1.98422	5.64	0.0458662	0.741714
FBgn0003463	0.380673	5.54632	5.61127	0.0458985	0.741714
FBgn0051158	0.3934	5.59136	5.60847	0.0459406	0.741714
FBgn0035756	0.423113	2.52902	5.60491	0.045994	0.741714
FBgn0037936	-0.495085	5.1731	5.61366	0.0460124	0.741714
FBgn0262582	0.625007	6.18697	5.62609	0.0460618	0.741714
FBgn0010905	0.804877	6.3524	5.60861	0.0463359	0.741714
FBgn0015600	0.263338	5.50209	5.5804	0.0463647	0.741714
FBgn0033204	-1.80962	3.22729	5.59873	0.0464851	0.741714
FBgn0044047	2.52183	3.77582	5.59164	0.0465926	0.741714
FBgn0035415	-0.450244	3.45236	5.5566	0.0467598	0.741714
FBgn0035793	0.349907	6.063	5.55387	0.04677	0.741714
FBgn0083045	-0.914574	1.09919	5.57609	0.0468291	0.741714
FBgn0037730	3.43056	3.5558	5.57108	0.0469058	0.741714
FBgn0035574	0.951731	5.66661	5.569	0.0469376	0.741714
FBgn0259212	0.713807	5.96773	5.56528	0.0469947	0.741714
FBgn0034797	0.591595	6.81914	5.54979	0.0470681	0.741714
FBgn0010575	0.94696	5.82602	5.55403	0.0471676	0.741714
FBgn0038943	3.74428	6.29773	5.55332	0.0471785	0.741714
FBgn0040056	-0.321789	5.60553	5.52221	0.0472598	0.741714
FBgn0000382	0.616687	5.23752	5.53654	0.0474381	0.741714
FBgn0036985	2.02691	6.77744	5.53519	0.0474591	0.741714
FBgn0015777	-0.341692	6.20838	5.49397	0.0477023	0.741714
FBgn0085451	0.427115	6.28408	5.48803	0.0477959	0.741714
FBgn0053265	0.884966	4.90163	5.49866	0.048031	0.741714
FBgn0023130	0.720707	2.5109	5.49823	0.0480378	0.741714
FBgn0083025	-0.822254	0.396243	5.48555	0.0480874	0.741714
FBgn0019985	-0.275244	2.92486	5.46864	0.0481035	0.741714
FBgn0266098	0.764002	1.00543	5.48289	0.0481624	0.741714
FBgn0040066	0.433938	3.69033	5.46653	0.0481688	0.741714
FBgn0000542	1.00953	4.84142	5.4864	0.0482249	0.741714
FBgn0053217	-0.643939	4.61071	5.48605	0.0482304	0.741714
FBgn0037563	-0.5293	4.94229	5.4678	0.0483639	0.741714
FBgn0266046	0.611028	0.314539	5.44904	0.0484171	0.741714
FBgn0034251	0.66073	0.70388	5.44818	0.0484879	0.741714
FBgn0005631	1.26072	3.84195	5.46624	0.0485459	0.741714
FBgn0020930	0.33704	4.59463	5.4343	0.0486546	0.741714
FBgn0022349	0.427923	5.87631	5.43111	0.0487296	0.741714
FBgn0264341	-0.676165	2.68482	5.45014	0.0488042	0.741714
FBgn0026411	0.970431	1.98116	5.448	0.0488388	0.741714
FBgn0034049	0.399896	5.07365	5.41014	0.0490471	0.741714
FBgn0031214	0.818104	1.32361	5.42571	0.0491996	0.741714
FBgn0004656	0.658132	6.94185	5.41744	0.0492777	0.741714
FBgn0030799	1.15887	1.14705	5.41898	0.0493093	0.741714
FBgn0023095	0.319394	6.08706	5.392	0.0493446	0.741714
FBgn0030812	0.603217	4.5473	5.41364	0.0493879	0.741714
FBgn0052698	3.16946	3.16349	5.40586	0.049524	0.741714
FBgn0000346	-0.415727	3.28356	5.37794	0.0495766	0.741714
FBgn0003321	0.474421	4.77803	5.38295	0.0496132	0.741714
FBgn0023549	1.92066	5.52896	5.39914	0.0496344	0.741714
FBgn0265104	0.575519	1.6735	5.36938	0.0497858	0.741714
FBgn0262475	0.274505	5.02001	5.36529	0.0497867	0.741714
FBgn0031048	0.388036	4.1415	5.36468	0.0497968	0.741714
FBgn0033065	-0.513978	4.58599	5.36978	0.049943	0.741714
FBgn0033934	-0.249711	5.10026	5.3545	0.0499667	0.741714
FBgn0031285	0.652832	6.52188	5.3742	0.0500383	0.741714
FBgn0031220	2.26148	4.5403	5.37077	0.050104	0.741714
FBgn0034720	0.358586	3.43023	5.34401	0.0501424	0.741714
FBgn0039043	0.428308	4.14357	5.34462	0.0501643	0.741714
FBgn0041723	0.547939	2.372	5.35087	0.0501732	0.741714
FBgn0028500	0.324328	5.23862	5.34034	0.0502042	0.741714
FBgn0030863	0.49779	4.45781	5.34809	0.0502916	0.741714
FBgn0052677	0.603255	2.94164	5.33796	0.0505948	0.741714
FBgn0261847	-1.10697	3.45668	5.32705	0.0508388	0.741714
FBgn0039241	2.86366	7.92189	5.30981	0.0511324	0.741714
FBgn0029899	0.627226	5.6055	5.30449	0.0512235	0.741714
FBgn0036782	3.43609	2.62154	5.30436	0.0512257	0.741714
FBgn0030494	2.62673	3.04849	5.30026	0.0512961	0.741714
FBgn0036671	0.366779	3.70116	5.27535	0.0513131	0.741714
FBgn0051778	2.3463	4.8901	5.29698	0.0513525	0.741714
FBgn0036036	-0.41112	2.18847	5.27232	0.0513656	0.741714
FBgn0052133	0.689965	4.11046	5.29531	0.051381	0.741714
FBgn0003366	0.910296	5.09082	5.2805	0.0516366	0.741714
FBgn0003046	3.88424	6.21952	5.27772	0.0516849	0.741714
FBgn0000153	2.53668	3.94788	5.27214	0.0517816	0.741714
FBgn0029082	0.437061	4.23622	5.2374	0.052038	0.741714
FBgn0035260	0.582151	1.93168	5.24245	0.0520426	0.741714
FBgn0032725	-0.272639	5.53336	5.23255	0.0520605	0.741714
FBgn0264089	0.839395	5.48002	5.25574	0.0520675	0.741714
FBgn0037448	1.24913	3.05078	5.25559	0.0520702	0.741714
FBgn0004861	0.860894	4.30666	5.25431	0.0520926	0.741714
FBgn0051370	-0.412496	4.85785	5.23064	0.0520943	0.741714
FBgn0026575	0.840977	5.64184	5.2529	0.0521173	0.741714
FBgn0037121	-0.404071	4.45887	5.22413	0.0522092	0.741714
FBgn0038926	0.589989	0.826147	5.22361	0.0522184	0.741714
FBgn0016984	0.36206	5.89468	5.21845	0.0523099	0.741714
FBgn0264343	-0.788003	0.742247	5.23285	0.0523778	0.741714
FBgn0035495	0.42355	4.13905	5.21398	0.0524217	0.741714
FBgn0028697	-0.388678	10.5804	5.21121	0.0524384	0.741714
FBgn0265523	0.596157	6.94301	5.22574	0.0524405	0.741714
FBgn0035308	0.381892	5.47968	5.21081	0.0524456	0.741714
FBgn0037906	-0.382662	5.22909	5.20981	0.0524634	0.741714
FBgn0039668	0.539883	5.48442	5.22049	0.0525967	0.741714
FBgn0046696	-0.62872	10.3304	5.21343	0.0526211	0.741714
FBgn0000567	1.42999	6.25908	5.22318	0.0526412	0.741714
FBgn0259216	-0.374675	6.37815	5.19807	0.0526728	0.741714
FBgn0041711	2.14716	4.84158	5.21773	0.052738	0.741714
FBgn0003285	0.459236	4.62876	5.19607	0.0528104	0.741714
FBgn0000071	3.11742	4.79051	5.20099	0.053037	0.741714
FBgn0039007	-0.426188	0.358493	5.17772	0.0530386	0.741714
FBgn0041710	2.96445	3.79205	5.1981	0.0530887	0.741714
FBgn0040071	0.69107	4.8943	5.19697	0.053109	0.741714
FBgn0035300	1.96156	3.53853	5.18931	0.0532466	0.741714
FBgn0032817	0.44565	5.85429	5.1681	0.0532894	0.741714
FBgn0003048	0.963347	5.72778	5.18586	0.0533088	0.741714
FBgn0030876	2.73508	6.01321	5.18427	0.0533376	0.741714
FBgn0038653	0.548762	3.13488	5.17564	0.0533668	0.741714
FBgn0000179	1.19118	3.38936	5.18175	0.0533831	0.741714
FBgn0036627	-0.364022	2.928	5.15187	0.0535078	0.741714
FBgn0003512	0.304112	3.9758	5.13738	0.0537733	0.741714
FBgn0030808	0.376266	4.97294	5.1362	0.0537949	0.741714
FBgn0000546	1.53719	6.73454	5.15739	0.0538255	0.741714
FBgn0029944	0.62634	4.20088	5.15141	0.0539348	0.741714
FBgn0036556	0.319181	5.52806	5.1244	0.0540123	0.741714
FBgn0030326	3.87359	6.72401	5.14549	0.0540433	0.741714
FBgn0035082	-0.269831	4.06472	5.11127	0.0542558	0.741714
FBgn0085446	0.949248	8.67596	5.12955	0.0543369	0.741714
FBgn0030030	-0.23916	3.88093	5.09826	0.0544982	0.741714
FBgn0051955	-0.585831	2.6326	5.09486	0.0548631	0.741714
FBgn0038471	-0.470601	4.15976	5.08091	0.0550065	0.741714
FBgn0011290	0.355228	2.78444	5.06956	0.0550381	0.741714
FBgn0033005	-0.423503	7.29577	5.06833	0.0550613	0.741714
FBgn0261710	0.854474	6.67816	5.08937	0.055086	0.741714
FBgn0022787	0.504407	5.84688	5.07973	0.0551091	0.741714
FBgn0022935	0.513501	3.87355	5.07991	0.0551395	0.741714
FBgn0000037	0.325154	1.67917	5.06124	0.0551957	0.741714
FBgn0262103	0.910098	5.00448	5.08316	0.055203	0.741714
FBgn0000017	1.01648	4.85296	5.08105	0.0552428	0.741714
FBgn0030556	0.251622	5.40015	5.03402	0.055716	0.741714
FBgn0034909	-0.405621	5.13743	5.03087	0.0557768	0.741714
FBgn0023509	0.3698	4.85159	5.02954	0.0558022	0.741714
FBgn0031907	2.71494	6.49649	5.04988	0.0558353	0.741714
FBgn0263081	-0.713523	3.16587	5.04922	0.055848	0.741714
FBgn0003460	0.395285	2.42082	5.02589	0.0558726	0.741714
FBgn0034639	-0.393603	2.37897	5.02317	0.0559253	0.741714
FBgn0033656	0.260366	3.80101	5.02278	0.0559327	0.741714
FBgn0051072	1.91553	6.08025	5.0405	0.0560153	0.741714
FBgn0037672	2.10837	2.83842	5.03712	0.0560802	0.741714
FBgn0036814	0.917385	5.27595	5.03117	0.056195	0.741714
FBgn0052654	0.369569	7.43774	5.00861	0.0562075	0.741714
FBgn0051151	0.452617	5.51599	5.01218	0.0562893	0.741714
FBgn0034010	0.599384	5.62206	5.02571	0.0563005	0.741714
FBgn0015380	2.07365	2.52211	5.02339	0.0563453	0.741714
FBgn0052026	1.46206	1.0345	5.02184	0.0563753	0.741714
FBgn0036028	-0.254081	3.58932	4.99381	0.0564962	0.741714
FBgn0036877	2.0071	3.35737	5.00398	0.0567227	0.741714
FBgn0030100	0.460544	1.78301	4.98156	0.0567367	0.741714
FBgn0265962	-0.774881	0.185217	4.9928	0.0567436	0.741714
FBgn0261362	-0.460349	8.07994	4.97751	0.0568165	0.741714
FBgn0038432	-0.259895	4.24258	4.97142	0.0569368	0.741714
FBgn0263462	-0.921755	3.20051	4.98811	0.0570339	0.741714
FBgn0034999	2.5953	5.95749	4.98091	0.0571757	0.741714
FBgn0036398	0.786467	6.10569	4.97832	0.0572268	0.741714
FBgn0035959	1.71973	5.1371	4.97158	0.0573603	0.741714
FBgn0266557	0.92179	8.59796	4.97006	0.0573902	0.741714
FBgn0083124	-0.447443	3.17705	4.94917	0.0574411	0.741714
FBgn0034899	-1.92211	6.22965	4.96096	0.0575711	0.741714
FBgn0026239	0.836697	5.05278	4.95873	0.0576156	0.741714
FBgn0000157	1.62827	2.19853	4.95857	0.0576187	0.741714
FBgn0040060	0.495176	9.44928	4.92556	0.0578527	0.741714
FBgn0030017	0.785065	1.83665	4.94514	0.0578871	0.741714
FBgn0039213	0.375179	6.81629	4.92279	0.0579087	0.741714
FBgn0046247	0.442499	3.95775	4.92291	0.0580392	0.741714
FBgn0038783	-0.624376	5.24151	4.93713	0.0580481	0.741714
FBgn0038260	1.00836	3.32746	4.93623	0.0580662	0.741714
FBgn0036374	0.643186	4.05696	4.93206	0.0581501	0.741714
FBgn0043005	-0.455457	1.28727	4.89786	0.0584151	0.741714
FBgn0039099	2.68288	2.59449	4.91839	0.0584267	0.741714
FBgn0030141	0.274235	4.82994	4.88571	0.0586641	0.741714
FBgn0037665	1.91191	1.30138	4.90269	0.0587464	0.741714
FBgn0029894	0.572736	3.68356	4.89912	0.0588194	0.741714
FBgn0063498	-0.567993	0.916583	4.86704	0.0590599	0.741714
FBgn0045063	0.295037	4.83767	4.86504	0.0590909	0.741714
FBgn0000719	0.6999	4.8086	4.88186	0.059174	0.741714
FBgn0039381	0.642558	4.20109	4.86675	0.0594867	0.741714
FBgn0036004	0.738174	5.75281	4.86634	0.0594951	0.741714
FBgn0000524	1.01789	3.48065	4.86487	0.0595257	0.741714
FBgn0000492	0.931247	1.82805	4.86234	0.0595784	0.741714
FBgn0035532	-0.376193	3.5919	4.84019	0.0596089	0.741714
FBgn0033196	0.269723	3.70319	4.83665	0.0596834	0.741714
FBgn0039787	-0.269526	4.55173	4.83644	0.0596877	0.741714
FBgn0053346	3.38233	3.15603	4.85269	0.0597796	0.741714
FBgn0003310	0.604714	4.2824	4.85269	0.0597796	0.741714
FBgn0030894	0.685181	3.03516	4.84959	0.0598444	0.741714
FBgn0038617	0.506222	3.73903	4.84131	0.0599044	0.741714
FBgn0030328	0.696576	5.52103	4.84428	0.0599556	0.741714
FBgn0004864	0.495394	4.70528	4.83505	0.0599715	0.741714
FBgn0033627	1.65661	1.61446	4.8426	0.059991	0.741714
FBgn0000497	1.20814	5.97961	4.84157	0.0600126	0.741714
FBgn0041096	0.339868	4.62208	4.81793	0.0600781	0.741714
FBgn0086901	0.617701	7.10115	4.83259	0.0601054	0.741714
FBgn0030351	-0.59618	1.62444	4.81779	0.0602681	0.741714
FBgn0034948	-0.226414	5.15017	4.80893	0.0602692	0.741714
FBgn0037636	0.841542	6.84124	4.82605	0.0603396	0.741714
FBgn0033638	1.62712	5.86234	4.82036	0.0604601	0.741714
FBgn0003870	0.496684	5.53859	4.81293	0.0604795	0.741714
FBgn0264324	0.759294	4.16587	4.81907	0.0604874	0.741714
FBgn0004569	0.48765	2.19226	4.79744	0.0605483	0.741714
FBgn0034861	-0.478121	1.49198	4.79037	0.0606656	0.741714
FBgn0033153	-0.529903	2.74941	4.79343	0.0608461	0.741714
FBgn0033875	3.12951	2.99402	4.80084	0.0608759	0.741714
FBgn0037613	-0.324256	2.8969	4.777	0.0609533	0.741714
FBgn0052533	0.33281	3.7705	4.7752	0.0609921	0.741714
FBgn0034512	1.93476	4.59768	4.79451	0.0610115	0.741714
FBgn0030357	2.10163	5.87967	4.79406	0.0610212	0.741714
FBgn0085436	0.674079	8.66425	4.78666	0.0611196	0.741714
FBgn0262577	-0.946201	5.25465	4.78328	0.0612531	0.741714
FBgn0034075	0.313386	6.76151	4.75629	0.0614022	0.741714
FBgn0261548	1.43666	5.47711	4.76841	0.0615747	0.741714
FBgn0026577	0.820424	5.00863	4.76801	0.0615833	0.741714
FBgn0052073	-1.71536	3.82263	4.76727	0.0615994	0.741714
FBgn0047114	-0.390809	2.7007	4.74433	0.0616636	0.741714
FBgn0052767	0.875629	5.11664	4.75828	0.0617951	0.741714
FBgn0003507	0.882209	4.32221	4.7569	0.0618253	0.741714
FBgn0265623	0.508729	4.32893	4.74889	0.0619033	0.741714
FBgn0046689	2.50977	1.89167	4.75189	0.0619347	0.741714
FBgn0002917	0.543201	1.9154	4.73759	0.0619395	0.741714
FBgn0042178	-0.787379	3.0445	4.73915	0.0622142	0.741714
FBgn0085825	-1.68063	3.38251	4.73882	0.0622215	0.741714
FBgn0261954	0.60656	6.52472	4.73096	0.0623817	0.741714
FBgn0051301	-0.321749	4.86858	4.71032	0.0624143	0.741714
FBgn0035146	1.00669	6.47641	4.7297	0.0624225	0.741714
FBgn0040256	-1.16326	6.99106	4.72786	0.0624632	0.741714
FBgn0263617	3.02995	3.72209	4.7273	0.0624757	0.741714
FBgn0038139	0.672801	3.34809	4.72493	0.062528	0.741714
FBgn0266418	0.694211	5.36094	4.71831	0.0626749	0.741714
FBgn0031376	-0.359016	5.84149	4.69276	0.0628067	0.741714
FBgn0051323	-0.302366	3.9687	4.69162	0.0628322	0.741714
FBgn0015591	-0.391293	2.78066	4.68992	0.0628704	0.741714
FBgn0051221	-0.432585	4.41295	4.69088	0.0629586	0.741714
FBgn0032652	1.07525	3.79781	4.69599	0.063173	0.741714
FBgn0024189	0.364655	4.12831	4.67155	0.0632846	0.741714
FBgn0052512	0.761711	2.17807	4.68997	0.0633085	0.741714
FBgn0264090	0.851672	4.35198	4.68693	0.0633769	0.741714
FBgn0003449	0.227122	5.06298	4.65445	0.0636733	0.741714
FBgn0032921	-0.357389	2.62187	4.64851	0.0638091	0.741714
FBgn0267001	1.44987	5.14836	4.66041	0.063978	0.741714
FBgn0027660	0.474405	6.01798	4.6473	0.0640727	0.741714
FBgn0033438	1.89067	3.82424	4.65474	0.0641076	0.741714
FBgn0260856	-0.351461	3.63715	4.63501	0.0641191	0.741714
FBgn0261267	0.409805	0.261763	4.63494	0.0641209	0.741714
FBgn0010488	1.13006	8.06553	4.65254	0.0641578	0.741714
FBgn0261588	1.6946	2.5287	4.646	0.0643077	0.741714
FBgn0038071	3.15322	3.42552	4.64197	0.0644005	0.741714
FBgn0265082	0.523855	6.86738	4.62679	0.0645215	0.741714
FBgn0085773	-1.4457	3.21813	4.63661	0.0645238	0.741714
FBgn0029864	0.357168	2.01375	4.61735	0.0645276	0.741714
FBgn0040099	2.80823	2.53673	4.63398	0.0645845	0.741714
FBgn0003319	0.740143	2.00866	4.62642	0.0647593	0.741714
FBgn0086444	0.305828	3.60817	4.60623	0.0647864	0.741714
FBgn0052758	1.42728	4.93589	4.62313	0.0648357	0.741714
FBgn0000448	0.527062	3.2208	4.61504	0.0649254	0.741714
FBgn0003274	-0.383844	10.4734	4.59774	0.0649852	0.741714
FBgn0026197	2.65424	5.20881	4.61218	0.0650904	0.741714
FBgn0002643	0.900244	5.07977	4.61036	0.0651329	0.741714
FBgn0261444	0.751213	5.36592	4.60863	0.0651733	0.741714
FBgn0085412	0.654964	5.50347	4.60837	0.0651793	0.741714
FBgn0039293	-0.301584	5.35816	4.58809	0.0652117	0.741714
FBgn0261885	0.682036	6.63605	4.60551	0.0652461	0.741714
FBgn0051121	0.482458	4.16141	4.59631	0.0653118	0.741714
FBgn0263463	-0.975106	1.73925	4.59899	0.0653989	0.741714
FBgn0030309	0.363005	6.03887	4.57349	0.0655566	0.741714
FBgn0029825	-0.468451	3.37624	4.57645	0.0657226	0.741714
FBgn0039403	-0.450059	2.06533	4.56637	0.0657254	0.741714
FBgn0031049	-0.601132	6.55931	4.58323	0.0657607	0.741714
FBgn0030582	0.400402	4.69594	4.56427	0.0658028	0.741714
FBgn0039818	-0.298209	4.43777	4.56063	0.0658621	0.741714
FBgn0034400	0.818494	6.67203	4.57881	0.0658746	0.741714
FBgn0000499	0.559539	3.74725	4.56524	0.066197	0.741714
FBgn0050359	1.93702	6.31718	4.5578	0.0663746	0.741714
FBgn0036155	1.41978	1.3339	4.555	0.0664416	0.741714
FBgn0046876	1.79997	3.05257	4.55307	0.0664878	0.741714
FBgn0052085	0.603415	1.64454	4.54452	0.0664999	0.741714
FBgn0033302	0.909827	3.13583	4.55073	0.066544	0.741714
FBgn0032935	1.14358	4.84193	4.54344	0.0667192	0.741714
FBgn0263258	0.279642	5.81743	4.52198	0.0667921	0.741714
FBgn0029161	-0.932726	2.05105	4.53998	0.0668025	0.741714
FBgn0031384	1.7515	2.94021	4.53649	0.0668869	0.741714
FBgn0265988	1.12261	5.80518	4.53558	0.0669089	0.741714
FBgn0085440	-0.467723	0.51283	4.51578	0.0669428	0.741714
FBgn0031939	1.96029	4.31624	4.5271	0.0671141	0.741714
FBgn0052218	0.63009	3.15824	4.51819	0.0673307	0.741714
FBgn0037553	2.00339	2.34648	4.51764	0.0673442	0.741714
FBgn0263772	0.593579	1.23435	4.50038	0.0674877	0.741714
FBgn0000152	0.383084	4.67677	4.49342	0.06749	0.741714
FBgn0086472	-0.457997	10.1541	4.49287	0.0675036	0.741714
FBgn0037375	0.48091	0.966015	4.49265	0.0675091	0.741714
FBgn0038938	-0.433532	4.76359	4.49538	0.0675731	0.741714
FBgn0260794	0.834512	8.07638	4.50628	0.0676218	0.741714
FBgn0040153	0.995771	4.19901	4.50586	0.067632	0.741714
FBgn0004854	0.944159	1.12417	4.50071	0.0677584	0.741714
FBgn0004959	1.25981	2.0396	4.49842	0.0678146	0.741714
FBgn0003656	0.541637	5.01788	4.49629	0.0678509	0.741714
FBgn0051249	-0.256854	3.71244	4.47839	0.0678613	0.741714
FBgn0027655	0.780015	5.6771	4.4952	0.0678938	0.741714
FBgn0002552	0.330261	3.91794	4.47241	0.0680095	0.741714
FBgn0039110	0.368775	4.95333	4.47151	0.0680319	0.741714
FBgn0015919	0.538346	3.3615	4.48686	0.0680617	0.741714
FBgn0263289	0.393649	7.34248	4.4698	0.0680744	0.741714
FBgn0029514	-0.344307	3.07252	4.46712	0.0681411	0.741714
FBgn0035267	1.20371	2.49762	4.48118	0.0682402	0.741714
FBgn0046225	1.18124	1.52205	4.47605	0.0683675	0.741714
FBgn0039764	-0.349935	2.7046	4.45719	0.0683891	0.741714
FBgn0037098	0.367061	6.57876	4.45487	0.0684473	0.741714
FBgn0020304	0.860917	5.99629	4.4717	0.0684756	0.741714
FBgn0002707	0.408517	2.98564	4.45389	0.0684871	0.741714
FBgn0029663	-0.408129	1.35891	4.45176	0.0685252	0.741714
FBgn0010220	-0.343795	4.15961	4.45146	0.0685327	0.741714
FBgn0030011	-0.306392	2.34474	4.44937	0.0685851	0.741714
FBgn0053107	-0.384905	1.73724	4.44649	0.0686576	0.741714
FBgn0000053	2.16507	6.98869	4.46432	0.0686597	0.741714
FBgn0086655	1.63868	4.53167	4.46375	0.0686741	0.741714
FBgn0035131	-0.310669	5.30882	4.44361	0.0687301	0.741714
FBgn0024947	-0.473478	7.12119	4.44181	0.0688386	0.741714
FBgn0085319	-0.801733	2.25377	4.45613	0.0688648	0.741714
FBgn0259735	0.423904	6.13401	4.4402	0.0688988	0.741714
FBgn0051224	0.839632	5.98683	4.45336	0.0689343	0.741714
FBgn0038651	0.921014	6.64888	4.45244	0.0689575	0.741714
FBgn0033431	0.616091	3.65888	4.45132	0.0689857	0.741714
FBgn0036493	2.06001	5.8841	4.44889	0.0690467	0.741714
FBgn0031484	0.382669	4.23756	4.43143	0.0690639	0.741714
FBgn0030082	0.446328	3.77186	4.43753	0.069124	0.741714
FBgn0266377	0.321083	5.79162	4.42165	0.069286	0.741714
FBgn0001142	0.479378	8.97689	4.42157	0.0693126	0.741714
FBgn0019940	0.327005	2.24311	4.41751	0.0693915	0.741714
FBgn0032783	0.792944	5.95415	4.43338	0.0694384	0.741714
FBgn0035769	0.439109	3.72914	4.42332	0.0694388	0.741714
FBgn0053208	1.12088	7.67664	4.43282	0.0694528	0.741714
FBgn0039475	3.81985	3.88162	4.42886	0.0695533	0.741714
FBgn0036205	0.271781	4.8342	4.41058	0.0695686	0.741714
FBgn0028663	-0.453646	7.93861	4.40918	0.0696043	0.741714
FBgn0262519	0.442806	7.04645	4.40876	0.0696272	0.741714
FBgn0262636	1.29825	1.7188	4.42381	0.0696818	0.741714
FBgn0041092	0.567624	6.87072	4.4154	0.0697961	0.741714
FBgn0030674	0.745808	7.92963	4.417	0.0698555	0.741714
FBgn0031698	0.672044	5.30788	4.41367	0.0699406	0.741714
FBgn0034126	0.962633	1.3558	4.41291	0.06996	0.741714
FBgn0034221	2.22382	2.29718	4.41215	0.0699795	0.741714
FBgn0003371	0.508851	6.96696	4.40002	0.0700314	0.741714
FBgn0030243	0.422579	5.25668	4.39492	0.0701032	0.741714
FBgn0041713	1.44499	6.53634	4.40602	0.0701366	0.741714
FBgn0031759	0.555445	6.03605	4.40469	0.0701707	0.741714
FBgn0005677	1.73309	3.05778	4.40099	0.0702659	0.741714
FBgn0024994	-0.321612	4.9135	4.38256	0.0702901	0.741714
FBgn0267461	-1.05521	1.47004	4.39999	0.0702918	0.741714
FBgn0037935	-0.463438	5.4433	4.38564	0.0704793	0.741714
FBgn0004514	-0.493053	2.12315	4.37739	0.0705076	0.741714
FBgn0031770	0.33587	0.832081	4.37133	0.0705822	0.741714
FBgn0004838	0.383957	8.83031	4.36167	0.0708347	0.741714
FBgn0050091	2.10665	1.33927	4.37844	0.0708496	0.741714
FBgn0030105	3.51509	4.85223	4.37422	0.0709595	0.741714
FBgn0010113	1.40173	5.84693	4.37113	0.0710402	0.741714
FBgn0030051	1.34281	5.29659	4.36895	0.071097	0.741714
FBgn0035001	0.262156	7.29835	4.34824	0.0711875	0.741714
FBgn0262029	1.21912	4.28098	4.35927	0.0713507	0.741714
FBgn0035393	-0.352972	2.91354	4.34146	0.0713663	0.741714
FBgn0261562	0.353294	3.38963	4.3413	0.0713707	0.741714
FBgn0265598	0.672093	2.27847	4.35829	0.0713764	0.741714
FBgn0031053	1.88702	1.28062	4.35231	0.0715338	0.741714
FBgn0030089	0.236801	6.44822	4.33399	0.0715642	0.741714
FBgn0039030	1.57104	3.00647	4.34789	0.0716504	0.741714
FBgn0027951	0.664473	5.37148	4.34712	0.0716707	0.741714
FBgn0036820	-0.449452	6.18298	4.33658	0.0716719	0.741714
FBgn0259704	-0.25963	3.09035	4.32964	0.0716799	0.741714
FBgn0263993	0.579609	5.71817	4.34307	0.0717776	0.741714
FBgn0032684	1.97625	5.82709	4.34275	0.0717862	0.741714
FBgn0051044	1.11796	2.90187	4.34234	0.0717969	0.741714
FBgn0034491	0.358571	4.34065	4.32416	0.0718256	0.741714
FBgn0024754	-0.212119	5.92343	4.31701	0.0720167	0.741714
FBgn0015336	0.296931	2.27257	4.31279	0.0721297	0.741714
FBgn0038881	1.22533	5.98654	4.32367	0.0722934	0.741714
FBgn0263239	1.10895	2.41693	4.32305	0.07231	0.741714
FBgn0038586	-0.30579	3.63708	4.30583	0.0723166	0.741714
FBgn0004875	0.461925	5.44882	4.31138	0.0724469	0.741714
FBgn0023518	0.438301	4.72906	4.30706	0.0724553	0.741714
FBgn0015774	0.438484	4.59686	4.30548	0.0725084	0.741714
FBgn0030809	0.842504	6.98095	4.31411	0.0725494	0.741714
FBgn0263489	-0.893862	1.6075	4.31166	0.0726151	0.741714
FBgn0032785	1.29381	4.48182	4.3085	0.0727001	0.741714
FBgn0039593	2.01056	3.98353	4.3034	0.0728375	0.741714
FBgn0001965	0.50806	4.39881	4.29899	0.0728929	0.741714
FBgn0003312	1.69548	1.36727	4.29415	0.0730874	0.741714
FBgn0026713	0.273047	5.19473	4.26864	0.0733257	0.741714
FBgn0014163	1.60251	6.75879	4.28148	0.0734318	0.741714
FBgn0261934	0.573064	5.78384	4.28029	0.0734642	0.741714
FBgn0036549	1.93926	4.05541	4.27966	0.0734813	0.741714
FBgn0036451	0.574467	6.32717	4.27762	0.073537	0.741714
FBgn0000562	0.251645	6.37405	4.25889	0.0735933	0.741714
FBgn0265276	1.43775	4.85976	4.2744	0.073625	0.741714
FBgn0035537	-0.410999	1.69984	4.25237	0.0737731	0.741714
FBgn0036667	-0.380884	5.05529	4.25261	0.0737912	0.741714
FBgn0029091	0.351422	3.66044	4.24925	0.0738593	0.741714
FBgn0017550	0.691101	5.1653	4.26376	0.0739167	0.741714
FBgn0040491	-0.630415	2.76437	4.26329	0.0739295	0.741714
FBgn0039026	0.476224	6.43959	4.25453	0.0739338	0.741714
FBgn0082980	-0.576691	0.835961	4.24898	0.0739461	0.741714
FBgn0025394	0.485641	4.9148	4.25696	0.073974	0.741714
FBgn0029094	-0.262682	4.9576	4.24327	0.0740248	0.741714
FBgn0031872	1.52121	3.56407	4.25943	0.0740357	0.741714
FBgn0082931	-0.615538	0.700868	4.24557	0.0741031	0.741714
FBgn0034422	-0.471383	3.63393	4.24864	0.0741934	0.741714
FBgn0051715	-0.254549	5.96969	4.23421	0.0742766	0.741714
FBgn0025742	0.363698	4.86259	4.23313	0.0743065	0.741714
FBgn0083984	-0.338246	2.59188	4.23213	0.0743344	0.741714
FBgn0260486	0.603597	4.64893	4.24573	0.0744145	0.741714
FBgn0033654	1.05261	2.69094	4.24387	0.074466	0.741714
FBgn0004394	0.336916	1.99627	4.22437	0.0745512	0.741714
FBgn0267435	1.31228	0.684305	4.24042	0.0745617	0.741714
FBgn0043362	1.38663	5.67643	4.23985	0.0745778	0.741714
FBgn0029093	1.50987	8.17697	4.23919	0.0745961	0.741714
FBgn0082960	-0.650107	0.611622	4.22909	0.0746211	0.741714
FBgn0051075	2.32919	8.04119	4.23519	0.0747073	0.741714
FBgn0033639	1.60828	5.14837	4.23227	0.0747888	0.741714
FBgn0051495	0.46402	1.69697	4.21417	0.0748372	0.741714
FBgn0265081	-0.497596	2.77543	4.22376	0.074838	0.741714
FBgn0020307	0.30048	3.99811	4.20999	0.0749549	0.741714
FBgn0022710	0.938211	4.5606	4.2237	0.0750284	0.741714
FBgn0023441	0.302445	5.82518	4.20735	0.0750293	0.741714
FBgn0039214	0.611334	6.37147	4.21659	0.0752281	0.741714
FBgn0037659	0.533936	4.67971	4.21262	0.0753303	0.741714
FBgn0027567	0.342649	6.0795	4.19651	0.0753357	0.741714
FBgn0040382	0.32769	5.10475	4.19314	0.0754315	0.741714
FBgn0259677	0.496485	2.22432	4.19879	0.0754382	0.741714
FBgn0263470	-0.600192	8.57681	4.20411	0.0754767	0.741714
FBgn0041111	0.598814	5.55348	4.20772	0.075478	0.741714
FBgn0004583	0.764872	5.22875	4.20739	0.0754874	0.741714
FBgn0264075	0.74515	3.47873	4.20472	0.0755628	0.741714
FBgn0037819	-0.342576	6.22497	4.18781	0.075583	0.741714
FBgn0261068	-0.224449	4.10796	4.18632	0.0756255	0.741714
FBgn0030803	-0.279384	3.44119	4.18603	0.0756337	0.741714
FBgn0028988	1.71072	2.64004	4.20077	0.0756748	0.741714
FBgn0034408	0.360939	4.48745	4.18227	0.0757409	0.741714
FBgn0023534	-0.338502	1.00589	4.18218	0.0757436	0.741714
FBgn0003086	-0.363747	6.13266	4.17524	0.075942	0.741714
FBgn0036266	-0.297249	2.22439	4.17251	0.0760204	0.741714
FBgn0085736	-0.792944	1.97343	4.18788	0.076041	0.741714
FBgn0031061	0.310598	3.53708	4.16929	0.0761126	0.741714
FBgn0028953	0.860474	4.5508	4.18317	0.0761755	0.741714
FBgn0085195	2.87643	8.5611	4.178	0.0763235	0.741714
FBgn0029996	1.05799	5.66874	4.17774	0.0763309	0.741714
FBgn0002945	0.943526	3.80577	4.17663	0.0763628	0.741714
FBgn0023094	1.77867	1.84186	4.17364	0.0764486	0.741714
FBgn0003464	0.638152	4.12989	4.17192	0.0764981	0.741714
FBgn0266227	-0.574515	2.38231	4.16902	0.0765112	0.741714
FBgn0004373	0.397106	6.75907	4.14871	0.076707	0.741714
FBgn0051163	1.3208	4.36501	4.16131	0.0768035	0.741714
FBgn0260003	0.367782	7.62908	4.13426	0.0771281	0.741714
FBgn0026320	2.17072	2.01654	4.1501	0.0771282	0.741714
FBgn0039530	0.293308	2.17217	4.13264	0.0771755	0.741714
FBgn0010825	0.55781	6.37863	4.14564	0.0772483	0.741714
FBgn0033809	1.63788	1.88356	4.14086	0.0773974	0.741714
FBgn0036196	0.750293	4.61419	4.13619	0.0775335	0.741714
FBgn0039169	0.558963	2.20437	4.12912	0.0776067	0.741714
FBgn0052549	0.701398	6.35786	4.12997	0.077716	0.741714
FBgn0033988	0.492829	4.76957	4.12458	0.0777714	0.741714
FBgn0031065	0.327918	2.09812	4.10794	0.0779024	0.741714
FBgn0030976	-0.306227	5.30193	4.10711	0.077927	0.741714
FBgn0023197	0.340766	9.36399	4.10571	0.0779685	0.741714
FBgn0082958	-0.42803	2.00154	4.1046	0.0780014	0.741714
FBgn0031006	0.400283	4.52211	4.10583	0.0780499	0.741714
FBgn0037218	0.361945	5.25964	4.09858	0.0781802	0.741714
FBgn0261671	0.974117	7.42897	4.11355	0.0781994	0.741714
FBgn0028490	0.332777	7.03505	4.09588	0.0782607	0.741714
FBgn0004607	0.866247	6.09623	4.10802	0.0783632	0.741714
FBgn0010473	0.771186	4.32187	4.10703	0.0783924	0.741714
FBgn0003742	-0.226007	4.21225	4.09	0.0784361	0.741714
FBgn0036038	0.25006	3.51982	4.08515	0.078581	0.741714
FBgn0033159	0.740854	5.62785	4.10028	0.0785929	0.741714
FBgn0036372	0.286066	5.83618	4.08451	0.0786	0.741714
FBgn0052267	-0.773069	4.9344	4.09983	0.0786065	0.741714
FBgn0041707	-0.240717	3.6993	4.0841	0.0786126	0.741714
FBgn0022224	-0.477388	4.328	4.09608	0.0786151	0.741714
FBgn0035690	0.348483	3.32844	4.08306	0.0786436	0.741714
FBgn0050296	-0.5064	6.45359	4.09308	0.0786704	0.741714
FBgn0259685	0.468683	6.62411	4.08832	0.0786721	0.741714
FBgn0027279	0.519893	6.69088	4.09192	0.0786985	0.741714
FBgn0001994	0.45658	5.41926	4.08981	0.0787319	0.741714
FBgn0085397	1.12863	3.74328	4.09247	0.078826	0.741714
FBgn0029878	0.781936	4.92102	4.09126	0.078862	0.741714
FBgn0265434	0.899106	8.38384	4.09016	0.0788948	0.741714
FBgn0033166	0.259962	4.87315	4.0599	0.0793419	0.741714
FBgn0031182	2.26254	1.44952	4.07234	0.0794304	0.741714
FBgn0000394	0.300914	4.61591	4.05534	0.0794802	0.741714
FBgn0266129	0.52579	1.12527	4.05605	0.0794995	0.741714
FBgn0039023	1.19848	1.82861	4.06769	0.0795707	0.741714
FBgn0263706	0.903958	5.63131	4.06375	0.0796899	0.741714
FBgn0039305	-0.344233	4.35365	4.04844	0.0796902	0.741714
FBgn0027497	0.291451	5.38792	4.0459	0.0797677	0.741714
FBgn0036277	-0.225673	2.88117	4.04444	0.0798124	0.741714
FBgn0000422	1.5716	7.32386	4.0582	0.0798583	0.741714
FBgn0033667	-0.31033	6.02569	4.04146	0.0799036	0.741714
FBgn0262854	1.89135	1.41275	4.05481	0.0799616	0.741714
FBgn0003862	0.698041	6.60449	4.05299	0.0800168	0.741714
FBgn0050115	0.626637	5.51416	4.05272	0.0800252	0.741714
FBgn0039081	-0.433772	6.2035	4.04171	0.0800715	0.741714
FBgn0263929	0.425235	6.6478	4.03707	0.0800924	0.741714
FBgn0001226	1.54558	6.57501	4.04429	0.0802826	0.741714
FBgn0041194	1.99189	5.33151	4.03902	0.0804441	0.741714
FBgn0038608	-0.36591	3.07002	4.02287	0.0804751	0.741714
FBgn0015268	-0.416142	8.33606	4.02259	0.0804836	0.741714
FBgn0031106	0.327477	3.48595	4.01882	0.0806003	0.741714
FBgn0262870	0.519059	5.14668	4.03289	0.0806224	0.741714
FBgn0265182	0.428468	1.66663	4.01371	0.0807584	0.741714
FBgn0029835	0.534719	4.487	4.02766	0.0807934	0.741714
FBgn0063493	-0.480868	5.25452	4.02421	0.0807962	0.741714
FBgn0034997	1.06827	6.01417	4.02505	0.0808738	0.741714
FBgn0050344	1.00296	5.06417	4.02207	0.0809659	0.741714
FBgn0065073	-0.442056	0.0949251	4.00504	0.0810283	0.741714
FBgn0036454	1.19446	6.66775	4.01997	0.0810309	0.741714
FBgn0039006	-0.332319	5.13573	4.00379	0.081067	0.741714
FBgn0033059	-0.509429	4.67644	4.01307	0.0812228	0.741714
FBgn0262473	0.385271	6.25916	3.99787	0.0812782	0.741714
FBgn0001404	0.490706	5.85538	4.0031	0.0814904	0.741714
FBgn0030788	0.570418	3.54571	4.00198	0.0815906	0.741714
FBgn0034310	-0.260987	4.62366	3.9866	0.0816054	0.741714
FBgn0046879	-0.617112	1.46276	3.99752	0.0816171	0.741714
FBgn0015399	1.45951	3.15655	4.00016	0.0816474	0.741714
FBgn0086898	0.368122	3.2799	3.9841	0.081684	0.741714
FBgn0010328	0.354534	6.52781	3.97844	0.0818624	0.741714
FBgn0030391	0.45708	2.35199	3.98016	0.0819026	0.741714
FBgn0031635	0.322893	4.3904	3.97425	0.0819949	0.741714
FBgn0250786	0.239477	6.37785	3.96932	0.082151	0.741714
FBgn0052707	0.263695	2.92112	3.95974	0.0824557	0.741714
FBgn0085305	2.1985	2.7606	3.97277	0.0825099	0.741714
FBgn0263197	0.319432	6.69474	3.95773	0.0825196	0.741714
FBgn0259246	0.400018	3.91667	3.96083	0.0825879	0.741714
FBgn0260938	0.706216	5.35333	3.97009	0.0825949	0.741714
FBgn0039632	1.29377	4.4155	3.9699	0.0826008	0.741714
FBgn0033791	0.576968	1.2858	3.95841	0.0827479	0.741714
FBgn0034443	2.33546	5.87061	3.96321	0.0828135	0.741714
FBgn0031399	0.396091	3.76796	3.94721	0.0830017	0.741714
FBgn0037061	-0.489156	3.60592	3.95437	0.0830306	0.741714
FBgn0016977	0.787419	8.2116	3.95503	0.0830747	0.741714
FBgn0030354	0.214213	5.4928	3.93691	0.0831875	0.741714
FBgn0034476	0.848098	4.90695	3.94714	0.0833275	0.741714
FBgn0003996	0.473691	4.75226	3.943	0.0833563	0.741714
FBgn0024698	-0.265739	5.10988	3.93093	0.0833806	0.741714
FBgn0036846	1.46575	4.82935	3.94515	0.0833916	0.741714
FBgn0031632	1.14455	2.30778	3.94463	0.0834081	0.741714
FBgn0000659	0.863079	3.3887	3.94031	0.0835474	0.741714
FBgn0003748	0.321143	6.45026	3.92552	0.0835556	0.741714
FBgn0260944	-0.305704	5.39262	3.92307	0.0836353	0.741714
FBgn0035173	0.657567	6.3346	3.93634	0.0836754	0.741714
FBgn0260935	0.453262	4.44549	3.93089	0.083693	0.741714
FBgn0000045	0.869045	0.439566	3.93281	0.0837892	0.741714
FBgn0053143	1.41559	2.46194	3.92959	0.0838935	0.741714
FBgn0031239	0.557912	2.4274	3.92746	0.0838972	0.741714
FBgn0035916	0.483936	3.90916	3.92408	0.0840325	0.741714
FBgn0000414	0.567082	5.07363	3.92093	0.0841747	0.741714
FBgn0033653	-0.22916	3.8979	3.90572	0.0842009	0.741714
FBgn0035271	-0.216985	3.44326	3.9036	0.0842703	0.741714
FBgn0037562	-0.689754	2.19186	3.91733	0.0842919	0.741714
FBgn0000137	0.385533	1.27022	3.90047	0.084373	0.741714
FBgn0261808	-0.231936	5.5958	3.8986	0.0844344	0.741714
FBgn0262719	0.72271	4.74614	3.91028	0.0845221	0.741714
FBgn0017418	0.411968	5.71061	3.9013	0.0845499	0.741714
FBgn0031264	-0.432873	4.87691	3.9007	0.0846172	0.741714
FBgn0026317	0.230704	4.68061	3.89156	0.0846664	0.741714
FBgn0266801	0.346819	3.59837	3.88752	0.0847997	0.741714
FBgn0035237	0.423876	6.48805	3.88986	0.0848173	0.741714
FBgn0032209	-0.342281	2.67326	3.88654	0.0848321	0.741714
FBgn0005612	2.08433	5.12434	3.9006	0.0848396	0.741714
FBgn0085450	0.470949	5.76332	3.89672	0.0848626	0.741714
FBgn0261931	0.524428	4.24977	3.89958	0.084873	0.741714
FBgn0038414	-0.342962	4.49138	3.88489	0.0848867	0.741714
FBgn0029903	1.23033	5.91351	3.89888	0.0848959	0.741714
FBgn0039451	0.307071	4.31637	3.88234	0.0849713	0.741714
FBgn0033813	0.33225	2.84085	3.88127	0.0850065	0.741714
FBgn0034703	-0.222324	2.99483	3.87763	0.0851275	0.741714
FBgn0032693	-0.34421	4.10704	3.87751	0.0851313	0.741714
FBgn0043853	-0.357706	6.70614	3.87741	0.0851348	0.741714
FBgn0037031	-0.268687	2.69066	3.87671	0.085158	0.741714
FBgn0264273	1.65783	3.95439	3.88622	0.085314	0.741714
FBgn0034440	-1.19923	4.98277	3.88045	0.0855052	0.741714
FBgn0000566	-0.240786	7.80458	3.86601	0.0855144	0.741714
FBgn0032703	-0.370225	4.28541	3.86737	0.0855181	0.741714
FBgn0053196	0.491258	10.5078	3.86822	0.0855394	0.741714
FBgn0031081	0.299309	4.35948	3.86198	0.0856494	0.741714
FBgn0037592	1.58166	5.26226	3.87546	0.0856709	0.741714
FBgn0028956	-0.244653	6.57937	3.85738	0.0858036	0.741714
FBgn0265140	0.4951	5.38793	3.86866	0.0858807	0.741714
FBgn0037007	1.87545	7.22887	3.8668	0.08596	0.741714
FBgn0266717	0.421722	8.41649	3.8518	0.085991	0.741714
FBgn0041604	0.372452	4.77782	3.84945	0.0861073	0.741714
FBgn0033951	0.469196	2.38635	3.85011	0.0862259	0.741714
FBgn0050016	-0.393125	3.07231	3.84561	0.0862549	0.741714
FBgn0085400	1.40753	3.21354	3.85788	0.086259	0.741714
FBgn0035900	0.302433	3.37997	3.8431	0.0862844	0.741714
FBgn0011785	0.537485	5.5257	3.85313	0.0864186	0.741714
FBgn0026428	0.741497	6.53777	3.85148	0.0864743	0.741714
FBgn0033475	-0.266423	3.97803	3.83663	0.0865037	0.741714
FBgn0030521	1.34101	7.20569	3.84884	0.0865631	0.741714
FBgn0031580	-0.398608	6.47831	3.83327	0.0866547	0.741714
FBgn0025525	0.7045	5.10326	3.84122	0.0868208	0.741714
FBgn0036285	0.839193	0.72941	3.83828	0.0869205	0.741714
FBgn0013949	0.41331	4.43313	3.82985	0.086939	0.741714
FBgn0003345	0.272471	6.05636	3.82368	0.0869443	0.741714
FBgn0262617	0.242355	6.40055	3.82192	0.0870043	0.741714
FBgn0086670	-0.720628	4.01853	3.83412	0.0870616	0.741714
FBgn0085414	0.264463	3.01805	3.81706	0.0871706	0.741714
FBgn0264078	0.265854	5.13552	3.81682	0.0871788	0.741714
FBgn0038872	0.438965	4.26371	3.82273	0.0872728	0.741714
FBgn0022702	0.451386	5.08838	3.823	0.0872897	0.741714
FBgn0037815	-0.514667	3.35517	3.82668	0.0873084	0.741714
FBgn0032068	-1.10845	7.52824	3.82525	0.087364	0.741714
FBgn0037623	1.07791	4.3821	3.82315	0.0874358	0.741714
FBgn0000617	0.294047	2.80085	3.80751	0.0874986	0.741714
FBgn0051849	0.808518	0.99345	3.82102	0.0875085	0.741714
FBgn0035164	-0.243623	2.91322	3.804	0.0876193	0.741714
FBgn0039730	0.38697	2.74125	3.79779	0.0878419	0.741714
FBgn0039186	0.317581	4.89736	3.79312	0.0879957	0.741714
FBgn0037171	0.853077	0.719185	3.80465	0.088071	0.741714
FBgn0038427	0.202111	4.54465	3.78991	0.0881071	0.741714
FBgn0053301	-0.527035	3.99325	3.7994	0.0882524	0.741714
FBgn0000416	1.11347	9.45798	3.79607	0.0883679	0.741714
FBgn0030960	0.307343	3.96223	3.7814	0.0884032	0.741714
FBgn0039130	1.3731	5.21104	3.79253	0.0884907	0.741714
FBgn0250869	1.69201	2.72221	3.79168	0.08852	0.741714
FBgn0085465	1.47104	1.49488	3.79154	0.0885247	0.741714
FBgn0038348	-0.576951	3.9388	3.78695	0.0886846	0.741714
FBgn0003159	0.488915	6.08251	3.78489	0.088691	0.741714
FBgn0052447	0.957888	3.08754	3.78546	0.0887366	0.741714
FBgn0010421	0.335443	3.34576	3.77186	0.0887371	0.741714
FBgn0033884	0.521704	1.88776	3.77902	0.0887402	0.741714
FBgn0010265	-0.365731	10.0552	3.76676	0.0889159	0.741714
FBgn0032336	-0.411822	2.83488	3.76882	0.0889311	0.741714
FBgn0050414	0.661906	3.69555	3.77719	0.0890253	0.741714
FBgn0037360	0.228064	5.67889	3.76312	0.089044	0.741714
FBgn0010223	-0.36905	4.38072	3.76114	0.089174	0.741714
FBgn0086694	0.415301	4.51574	3.7638	0.0892395	0.741714
FBgn0029831	1.63954	5.24712	3.7683	0.089337	0.741714
FBgn0043575	1.44951	5.68493	3.76798	0.0893483	0.741714
FBgn0033313	1.15401	7.03998	3.76648	0.0894009	0.741714
FBgn0011230	0.70364	9.18636	3.76648	0.0894011	0.741714
FBgn0032727	1.03182	5.04016	3.76441	0.089474	0.741714
FBgn0011817	1.00217	4.81722	3.76389	0.0894922	0.741714
FBgn0042179	-0.33078	4.4907	3.74999	0.0895079	0.741714
FBgn0037758	0.577209	5.74593	3.7625	0.0895412	0.741714
FBgn0000212	0.776623	5.16688	3.76174	0.0895681	0.741714
FBgn0003741	0.729559	1.7521	3.76027	0.0896198	0.741714
FBgn0038421	-0.507269	1.49822	3.74902	0.0896615	0.741714
FBgn0039486	-0.771082	3.98455	3.75822	0.0896923	0.741714
FBgn0031413	-0.500585	2.90845	3.75483	0.0897065	0.741714
FBgn0037485	0.280077	2.76675	3.74426	0.0897116	0.741714
FBgn0010194	1.00693	2.85238	3.7531	0.0898735	0.741714
FBgn0053543	-0.41229	1.86628	3.73843	0.0899192	0.741714
FBgn0053460	0.486305	1.10955	3.73692	0.0899947	0.741714
FBgn0262116	-0.591602	7.10914	3.74643	0.0901103	0.741714
FBgn0003053	0.436005	5.38784	3.73778	0.0902401	0.741714
FBgn0029957	0.494841	3.34681	3.74168	0.0902497	0.741714
FBgn0026375	0.705901	5.5623	3.74134	0.0902914	0.741714
FBgn0034262	-0.32393	3.0908	3.728	0.0902921	0.741714
FBgn0024941	0.332613	2.14479	3.72587	0.0903685	0.741714
FBgn0003475	0.260225	4.51575	3.72353	0.0904525	0.741714
FBgn0029002	1.37296	3.86097	3.73598	0.0904825	0.741714
FBgn0027601	1.3487	6.42707	3.73388	0.0905577	0.741714
FBgn0040765	0.320195	4.67113	3.71808	0.0906487	0.741714
FBgn0015904	0.691403	2.99924	3.72993	0.0906994	0.741714
FBgn0261797	0.352577	8.62761	3.71485	0.0907651	0.741714
FBgn0034789	0.6559	1.84217	3.72806	0.0907663	0.741714
FBgn0030451	-0.679262	4.07568	3.7229	0.0909517	0.741714
FBgn0041210	0.194365	5.93045	3.70956	0.0909563	0.741714
FBgn0037363	0.706391	5.72847	3.72243	0.0909687	0.741714
FBgn0039778	-0.704391	8.3455	3.71892	0.0910953	0.741714
FBgn0028982	0.410177	6.42477	3.70809	0.0911057	0.741714
FBgn0030486	0.469951	4.62995	3.71366	0.0911791	0.741714
FBgn0028687	0.603424	6.82235	3.70851	0.0914716	0.741714
FBgn0003719	1.54308	1.76079	3.70705	0.0915246	0.741714
FBgn0026059	0.328667	6.9526	3.69346	0.0915418	0.741714
FBgn0034612	1.29912	4.15157	3.70649	0.0915449	0.741714
FBgn0039229	0.352186	5.30388	3.69322	0.0915775	0.741714
FBgn0034636	1.77215	1.87695	3.7038	0.0916423	0.741714
FBgn0044452	0.747798	6.45203	3.7035	0.0916534	0.741714
FBgn0262160	1.18135	7.10899	3.69202	0.0920717	0.741714
FBgn0025634	0.406006	3.25087	3.68358	0.0920769	0.741714
FBgn0000576	0.894491	0.962052	3.69047	0.0921284	0.741714
FBgn0030837	0.527991	6.2437	3.69028	0.0921355	0.741714
FBgn0023169	0.229688	6.50248	3.67512	0.0922143	0.741714
FBgn0000635	0.335154	6.55519	3.67423	0.0922472	0.741714
FBgn0039714	0.896461	5.19181	3.6858	0.0922996	0.741714
FBgn0026206	0.464821	6.01224	3.68086	0.0923749	0.741714
FBgn0046296	0.445907	3.57267	3.67718	0.0924807	0.741714
FBgn0264491	0.654791	5.37688	3.67834	0.0925738	0.741714
FBgn0031450	1.13502	4.9621	3.6779	0.0925902	0.741714
FBgn0037897	1.06159	5.5027	3.67673	0.0926331	0.741714
FBgn0036373	0.533099	3.80285	3.6724	0.092793	0.741714
FBgn0086690	0.54211	6.11406	3.67039	0.0928673	0.741714
FBgn0053182	0.511681	2.14944	3.66451	0.0928994	0.741714
FBgn0034046	0.497053	2.66603	3.66451	0.0929655	0.741714
FBgn0034706	1.21471	4.22278	3.66001	0.0932519	0.741714
FBgn0243486	0.906257	2.98069	3.657	0.0933639	0.741714
FBgn0262614	0.647879	6.81757	3.65404	0.0934743	0.741714
FBgn0033949	-0.408427	5.21406	3.64597	0.0935275	0.741714
FBgn0011592	0.93433	4.95919	3.65235	0.0935372	0.741714
FBgn0029941	0.358062	5.989	3.6401	0.0935545	0.741714
FBgn0003984	0.263578	3.79262	3.63865	0.0935713	0.741714
FBgn0036576	1.31357	4.01869	3.65105	0.0935857	0.741714
FBgn0038088	0.890092	4.7578	3.64859	0.0936778	0.741714
FBgn0030505	0.48271	6.52696	3.64452	0.0936855	0.741714
FBgn0263198	0.346912	5.24203	3.63597	0.0936884	0.741714
FBgn0037760	0.802811	5.53434	3.64792	0.0937028	0.741714
FBgn0038966	1.90579	3.22771	3.64689	0.0937413	0.741714
FBgn0039590	0.991955	4.69998	3.64414	0.0938445	0.741714
FBgn0260965	0.421702	3.84682	3.63879	0.0938658	0.741714
FBgn0263005	0.377759	4.59329	3.63275	0.0938814	0.741714
FBgn0036913	0.222732	5.41885	3.62535	0.0940726	0.741714
FBgn0039747	-0.317867	3.55696	3.62341	0.094146	0.741714
FBgn0261648	0.69004	3.14389	3.63526	0.0941781	0.741714
FBgn0052404	1.4527	2.70116	3.6344	0.0942105	0.741714
FBgn0029873	0.350215	3.67935	3.62015	0.0943072	0.741714
FBgn0061492	-0.36298	5.91313	3.61994	0.0943346	0.741714
FBgn0023510	0.235181	6.17268	3.61742	0.0943732	0.741714
FBgn0259481	0.615821	5.67534	3.62695	0.0944916	0.741714
FBgn0033887	0.436348	1.97837	3.61406	0.0945385	0.741714
FBgn0053512	-0.326891	1.6556	3.60817	0.0947253	0.741714
FBgn0031248	1.86037	7.59774	3.62041	0.0947394	0.741714
FBgn0036035	-0.436164	4.25894	3.61656	0.0947467	0.741714
FBgn0085483	-1.03756	2.54889	3.61936	0.0947793	0.741714
FBgn0013726	0.638371	5.53243	3.61878	0.0948014	0.741714
FBgn0033249	0.387789	0.870568	3.60603	0.0948073	0.741714
FBgn0031227	-0.47127	3.47926	3.61606	0.0948377	0.741714
FBgn0034901	-0.545871	8.01852	3.61131	0.0949438	0.741714
FBgn0085300	-1.00625	3.21002	3.61199	0.0950596	0.741714
FBgn0010313	0.982608	4.90387	3.61187	0.0950644	0.741714
FBgn0038542	0.351512	3.137	3.59591	0.0951949	0.741714
FBgn0032467	1.14744	6.7776	3.60825	0.0952026	0.741714
FBgn0031062	-0.366358	4.11478	3.59671	0.0952524	0.741714
FBgn0040236	0.595793	5.87769	3.60599	0.0952888	0.741714
FBgn0050495	-0.416921	2.98805	3.59303	0.0954866	0.741714
FBgn0041184	-0.33232	5.2631	3.58388	0.0956586	0.741714
FBgn0264542	0.491983	3.27057	3.59365	0.0957393	0.741714
FBgn0005638	1.46192	3.85663	3.59237	0.0958113	0.741714
FBgn0039016	0.292852	4.87439	3.57961	0.0958238	0.741714
FBgn0036040	0.625075	0.684672	3.58442	0.0959366	0.741714
FBgn0052372	0.39465	5.45236	3.58001	0.0960124	0.741714
FBgn0263392	1.00104	6.16867	3.58628	0.0960462	0.741714
FBgn0034396	0.801075	2.9545	3.58498	0.0960967	0.741714
FBgn0038156	0.415783	3.19825	3.57786	0.0960998	0.741714
FBgn0038878	-0.647581	4.0773	3.58296	0.0961746	0.741714
FBgn0029003	0.699966	4.31229	3.57897	0.0963295	0.741714
FBgn0038082	-1.77956	5.28088	3.57873	0.0963387	0.741714
FBgn0004865	1.71225	4.97347	3.57792	0.0963701	0.741714
FBgn0031299	0.273794	3.05674	3.56381	0.0964385	0.741714
FBgn0263968	0.322289	5.93884	3.56133	0.0965355	0.741714
FBgn0020513	1.54425	6.96894	3.57139	0.0966237	0.741714
FBgn0034313	0.393446	4.71325	3.56345	0.0966313	0.741714
FBgn0262815	-0.786092	1.52816	3.56863	0.0967314	0.741714
FBgn0030090	0.667182	2.70967	3.56416	0.0969061	0.741714
FBgn0011656	0.25168	6.27195	3.54613	0.0971323	0.741714
FBgn0037728	-0.260552	8.32985	3.54533	0.0971639	0.741714
FBgn0036732	0.594072	5.7314	3.55686	0.0971919	0.741714
FBgn0028481	0.479201	2.57434	3.55078	0.0972507	0.741714
FBgn0085294	-0.383414	0.377496	3.54084	0.0973412	0.741714
FBgn0003447	0.976021	5.46166	3.55301	0.0973429	0.741714
FBgn0027932	1.55512	6.35327	3.55296	0.0973451	0.741714
FBgn0034293	-0.400856	2.55359	3.5402	0.097408	0.741714
FBgn0051374	0.577521	5.65159	3.54823	0.0975313	0.741714
FBgn0038172	0.839197	4.51305	3.5463	0.0976073	0.741714
FBgn0015524	-0.221748	3.77587	3.53293	0.0976546	0.741714
FBgn0260758	1.00561	0.761225	3.54244	0.0977597	0.741714
FBgn0041156	0.360265	2.07153	3.52791	0.0978544	0.741714
FBgn0028331	0.705509	7.20502	3.53932	0.0978834	0.741714
FBgn0011638	-0.549256	7.21862	3.5376	0.0978842	0.741714
FBgn0265778	0.719169	4.89602	3.53688	0.09798	0.741714
FBgn0034140	0.846922	7.04758	3.53667	0.0979883	0.741714
FBgn0086899	0.513292	6.0937	3.53472	0.0980659	0.741714
FBgn0035539	1.09116	3.3626	3.53297	0.0981352	0.741714
FBgn0262569	-0.671932	0.116618	3.52752	0.0981459	0.741714
FBgn0033089	-0.25	3.22057	3.51865	0.0982241	0.741714
FBgn0033132	1.48329	2.53158	3.5289	0.0982971	0.741714
FBgn0267792	1.3976	4.50027	3.52604	0.0984113	0.741714
FBgn0053988	0.370989	2.98042	3.51461	0.0984234	0.741714
FBgn0020279	0.463985	7.48038	3.51484	0.0985518	0.741714
FBgn0003997	1.67242	2.02162	3.52191	0.0985759	0.741714
FBgn0086686	0.595758	5.62594	3.52139	0.0985969	0.741714
FBgn0083057	-0.496831	2.99753	3.51916	0.0986455	0.741714
FBgn0263039	0.337966	4.67925	3.50546	0.0987535	0.741714
FBgn0052537	0.341417	2.20843	3.50364	0.0988269	0.741714
FBgn0022764	0.720838	6.51778	3.51486	0.0988583	0.741714
FBgn0260744	1.20425	5.52049	3.51137	0.0989983	0.741714
FBgn0030932	0.397376	5.22654	3.50179	0.0991107	0.741714
FBgn0261260	0.495427	7.95934	3.50213	0.0991204	0.741714
FBgn0028516	0.221093	3.16473	3.4943	0.0992044	0.741714
FBgn0002567	0.663454	5.44627	3.50558	0.0992314	0.741714
FBgn0013954	-0.339251	8.33399	3.4936	0.0992328	0.741714
FBgn0263027	-0.433255	0.847799	3.48982	0.0993865	0.741714
FBgn0042103	-0.301982	1.90405	3.48952	0.0993985	0.741714
FBgn0051251	-0.299464	1.00086	3.48881	0.0994273	0.741714
FBgn0261703	0.211478	5.63728	3.48807	0.0994575	0.741714
FBgn0037344	0.499459	6.24562	3.4994	0.0994708	0.741714
FBgn0037315	0.404831	5.65358	3.4908	0.0996201	0.741714
FBgn0023524	0.575637	1.39098	3.49208	0.0996349	0.741714
FBgn0030097	1.13833	5.48414	3.49546	0.0996407	0.741714
FBgn0051076	1.65779	4.08817	3.49487	0.0996646	0.741714
FBgn0261545	0.350148	5.22759	3.48227	0.0997318	0.741714
FBgn0011746	0.759354	1.46125	3.48968	0.0998753	0.741714
FBgn0036342	-0.474306	3.26256	3.48329	0.100068	0.741714
FBgn0036935	-0.524696	2.67642	3.484	0.100089	0.741714
FBgn0020278	0.845626	5.3092	3.48333	0.100134	0.741714
FBgn0037705	0.671694	5.54039	3.48101	0.100229	0.741714
FBgn0035469	0.375877	3.79869	3.47058	0.100355	0.741714
FBgn0030274	0.88503	4.15528	3.47703	0.100391	0.741714
FBgn0011571	-0.289116	5.10907	3.46407	0.10044	0.741714
FBgn0032048	-0.515687	3.21881	3.47568	0.100447	0.741714
FBgn0035617	0.888887	3.88212	3.47308	0.100554	0.741714
FBgn0026083	0.362877	7.01613	3.45907	0.100646	0.741714
FBgn0259224	0.582524	4.46786	3.4679	0.100766	0.741714
FBgn0028979	0.458232	2.77055	3.45808	0.10099	0.741714
FBgn0038179	0.60398	3.30965	3.45943	0.101115	0.741714
FBgn0004647	1.04883	6.42895	3.45673	0.101227	0.741714
FBgn0040837	-0.578695	1.91007	3.45593	0.101237	0.741714
FBgn0000097	0.646982	4.86886	3.45633	0.101244	0.741714
FBgn0050015	0.388051	5.75079	3.44749	0.101336	0.741714
FBgn0030763	0.547519	5.43048	3.45409	0.101337	0.741714
FBgn0034264	0.715978	2.56326	3.45322	0.101373	0.741714
FBgn0036899	0.590314	1.44925	3.44798	0.101483	0.741714
FBgn0021764	0.714689	6.1421	3.44695	0.101633	0.741714
FBgn0040850	1.54355	3.44355	3.44673	0.101642	0.741714
FBgn0033017	-0.244663	5.8367	3.43333	0.101717	0.741714
FBgn0031682	0.582926	3.85783	3.44373	0.101767	0.741714
FBgn0011596	0.955662	3.00236	3.44	0.101922	0.741714
FBgn0259716	1.59512	5.60685	3.43903	0.101963	0.741714
FBgn0033754	-0.56	3.57044	3.43682	0.102055	0.741714
FBgn0038129	1.25506	4.61692	3.43631	0.102077	0.741714
FBgn0011725	0.372235	5.18169	3.42687	0.102115	0.741714
FBgn0052227	1.17783	2.156	3.43393	0.102176	0.741714
FBgn0052206	0.325392	2.26031	3.42043	0.102259	0.741714
FBgn0000625	0.672062	1.64922	3.43122	0.10229	0.741714
FBgn0000014	0.77016	5.07717	3.42677	0.102477	0.741714
FBgn0019947	0.5119	5.36695	3.42359	0.102611	0.741714
FBgn0000307	0.695005	5.28549	3.42081	0.102728	0.741714
FBgn0264495	0.836327	5.46071	3.41917	0.102797	0.741714
FBgn0261789	-0.191545	4.7993	3.4064	0.102853	0.741714
FBgn0003598	0.655333	3.85244	3.41482	0.102981	0.741714
FBgn0086698	0.434263	2.97435	3.40778	0.103069	0.741714
FBgn0030318	0.433549	5.10583	3.40782	0.103148	0.741714
FBgn0031059	0.371143	2.1173	3.39932	0.103154	0.741714
FBgn0035041	0.698254	0.771987	3.40971	0.103198	0.741714
FBgn0022724	0.507432	1.78249	3.40429	0.103202	0.741714
FBgn0028475	-0.256788	6.38822	3.39808	0.103207	0.741714
FBgn0005632	0.301156	7.99923	3.39611	0.103291	0.741714
FBgn0013469	0.755864	2.46963	3.40743	0.103295	0.741714
FBgn0266452	-0.318718	5.75513	3.39521	0.10333	0.741714
FBgn0030600	0.793053	4.76257	3.40329	0.10347	0.741714
FBgn0027339	0.797867	6.29812	3.40177	0.103535	0.741714
FBgn0031161	0.766137	4.57816	3.39862	0.10367	0.741714
FBgn0034552	-0.779325	2.98643	3.39228	0.103941	0.741714
FBgn0038449	1.79183	1.60209	3.39155	0.103972	0.741714
FBgn0032934	0.94178	2.8462	3.39002	0.104038	0.741714
FBgn0030974	0.373105	4.31732	3.38005	0.104154	0.741714
FBgn0002592	1.44302	1.16679	3.38696	0.104169	0.741714
FBgn0034067	0.35477	6.27297	3.37516	0.104219	0.741714
FBgn0039207	0.643647	6.2491	3.38561	0.104227	0.741714
FBgn0031971	1.11042	5.81113	3.38344	0.10432	0.741714
FBgn0039311	-0.230561	6.67997	3.37098	0.104373	0.741714
FBgn0082962	-0.625657	0.284127	3.37622	0.104406	0.741714
FBgn0037757	0.300381	4.14572	3.36944	0.104439	0.741714
FBgn0086856	-0.56893	4.38202	3.38064	0.104441	0.741714
FBgn0030766	0.42635	4.4366	3.37384	0.104594	0.741714
FBgn0033889	0.641688	5.40795	3.37486	0.104691	0.741714
FBgn0038087	-0.302493	1.1078	3.36308	0.104715	0.741714
FBgn0262954	-0.295199	3.95424	3.3629	0.104723	0.741714
FBgn0035294	0.308873	3.41727	3.36191	0.104766	0.741714
FBgn0053971	0.530324	1.48475	3.36817	0.104769	0.741714
FBgn0031515	1.4522	4.49317	3.36932	0.104931	0.741714
FBgn0266696	0.280714	8.18526	3.35796	0.104938	0.741714
FBgn0002533	2.93429	7.24384	3.36566	0.10509	0.741714
FBgn0031791	0.706722	5.09298	3.36319	0.105197	0.741714
FBgn0262081	0.384828	6.20675	3.35481	0.105223	0.741714
FBgn0032670	-0.49065	2.13724	3.35654	0.105299	0.741714
FBgn0019952	1.06995	5.84054	3.36046	0.105316	0.741714
FBgn0030955	1.06804	6.85379	3.35876	0.10539	0.741714
FBgn0031091	-0.392735	1.73251	3.34358	0.105568	0.741714
FBgn0027578	0.497092	6.76054	3.35212	0.105572	0.741714
FBgn0024250	0.937861	3.26086	3.35371	0.105611	0.741714
FBgn0031250	0.750341	4.81715	3.35361	0.105615	0.741714
FBgn0030502	0.376351	5.17388	3.34637	0.105623	0.741714
FBgn0030093	0.471853	4.6039	3.3516	0.105693	0.741714
FBgn0037539	0.644295	3.58024	3.35155	0.105705	0.741714
FBgn0035533	0.346711	5.42384	3.33941	0.105817	0.741714
FBgn0032256	-0.252776	2.92895	3.33692	0.105862	0.741714
FBgn0001079	0.652546	3.17852	3.34575	0.105959	0.741714
FBgn0030098	1.46491	6.77233	3.34414	0.10603	0.741714
FBgn0001324	0.60566	5.20223	3.33422	0.106468	0.741714
FBgn0041188	0.514803	5.69616	3.33188	0.106571	0.741714
FBgn0042175	0.884565	2.70181	3.33107	0.106607	0.741714
FBgn0265998	0.420607	7.20446	3.30951	0.10717	0.741714
FBgn0035033	0.798191	2.32242	3.31739	0.107215	0.741714
FBgn0028341	0.58308	5.91099	3.31697	0.107234	0.741714
FBgn0038638	0.257343	5.55285	3.30549	0.107261	0.741714
FBgn0034925	-0.219781	4.411	3.3049	0.107287	0.741714
FBgn0019972	1.22124	4.96824	3.31222	0.107446	0.741714
FBgn0027791	0.243071	3.87214	3.30107	0.107459	0.741714
FBgn0031977	-0.207723	5.29078	3.29832	0.107583	0.741714
FBgn0011648	0.381869	4.99772	3.30005	0.107689	0.741714
FBgn0035346	0.428422	3.28436	3.3018	0.107758	0.741714
FBgn0051864	-0.388484	0.60131	3.29387	0.107784	0.741714
FBgn0004177	0.257549	7.44137	3.29152	0.10789	0.741714
FBgn0040372	0.43213	5.08913	3.29974	0.107898	0.741714
FBgn0259984	0.886697	5.50666	3.30201	0.107904	0.741714
FBgn0026749	0.768064	3.32016	3.29888	0.108046	0.741714
FBgn0030038	0.219094	6.55904	3.28736	0.108078	0.741714
FBgn0030412	0.403426	5.35024	3.29337	0.108096	0.741714
FBgn0034921	0.219064	3.95186	3.28514	0.108179	0.741714
FBgn0032517	0.474854	3.67449	3.29426	0.108254	0.741714
FBgn0039946	0.487635	1.38016	3.2861	0.108283	0.741714
FBgn0040322	0.747363	1.74681	3.29069	0.108416	0.741714
FBgn0022936	0.214116	3.08349	3.27824	0.108493	0.741714
FBgn0039868	-0.502562	4.13495	3.28821	0.108528	0.741714
FBgn0026084	1.40855	7.24028	3.28744	0.108563	0.741714
FBgn0023528	0.943952	4.98559	3.28577	0.108638	0.741714
FBgn0003277	0.497528	6.3747	3.28466	0.108678	0.741714
FBgn0029911	0.93941	4.3019	3.28419	0.10871	0.741714
FBgn0028695	0.702298	7.41012	3.28306	0.108762	0.741714
FBgn0029712	-0.640931	2.06649	3.28036	0.108884	0.741714
FBgn0062449	-0.192109	3.8653	3.26961	0.108887	0.741714
FBgn0030286	0.34915	4.99549	3.26975	0.108949	0.741714
FBgn0032751	0.451283	1.27622	3.26892	0.108957	0.741714
FBgn0000618	0.274195	3.00478	3.26763	0.108978	0.741714
FBgn0036448	0.917241	6.294	3.27244	0.109246	0.741714
FBgn0261113	-0.291569	8.06445	3.2602	0.109319	0.741714
FBgn0034970	0.379083	4.05451	3.2596	0.109582	0.741714
FBgn0030228	0.270957	3.23534	3.25169	0.109711	0.741714
FBgn0046685	0.44886	3.81504	3.26112	0.109747	0.741714
FBgn0027504	0.543848	4.46476	3.25915	0.109856	0.741714
FBgn0262730	0.766017	4.22398	3.25904	0.109861	0.741714
FBgn0000504	1.46039	2.45708	3.25876	0.109874	0.741714
FBgn0029644	-1.72908	0.831014	3.25783	0.109916	0.741714
FBgn0038582	0.428418	2.02824	3.24796	0.109974	0.741714
FBgn0050069	0.380786	8.30408	3.24303	0.110113	0.741714
FBgn0264386	0.324741	4.07476	3.2414	0.110215	0.741714
FBgn0030400	0.327255	4.75291	3.24004	0.110252	0.741714
FBgn0261854	0.333096	5.63071	3.23866	0.110354	0.741714
FBgn0243516	0.504104	4.65581	3.24671	0.110431	0.741714
FBgn0260462	0.881637	7.34517	3.24362	0.110574	0.741714
FBgn0051357	0.811713	3.80862	3.24253	0.110625	0.741714
FBgn0024956	0.359694	2.54592	3.23137	0.110657	0.741714
FBgn0004449	0.848541	6.59615	3.2397	0.110757	0.741714
FBgn0030653	1.0485	4.7982	3.23869	0.110804	0.741714
FBgn0266521	1.38667	5.18529	3.23822	0.110826	0.741714
FBgn0038455	-0.350462	4.35624	3.22646	0.110976	0.741714
FBgn0036046	-0.451439	2.17095	3.22895	0.110982	0.741714
FBgn0038312	0.859452	3.09511	3.23463	0.110993	0.741714
FBgn0029736	0.487767	4.53167	3.23441	0.111003	0.741714
FBgn0051935	0.698073	4.21237	3.23312	0.111064	0.741714
FBgn0036773	0.42932	4.11245	3.23014	0.111116	0.741714
FBgn0265042	-0.210756	5.90011	3.21856	0.111258	0.741714
FBgn0013756	0.44058	7.00325	3.22177	0.111319	0.741714
FBgn0035112	0.376961	0.749072	3.21626	0.111366	0.741714
FBgn0024179	0.450746	4.49857	3.22402	0.111457	0.741714
FBgn0264750	-0.368808	7.52648	3.21007	0.111658	0.741714
FBgn0031717	1.4606	5.61431	3.21932	0.111711	0.741714
FBgn0036483	0.387251	3.60176	3.21171	0.111842	0.741714
FBgn0038533	0.496454	4.82046	3.21618	0.111859	0.741714
FBgn0029795	1.08453	3.69329	3.21563	0.111885	0.741714
FBgn0052685	0.332623	6.22786	3.20221	0.112031	0.741714
FBgn0037435	-0.357064	2.65065	3.20095	0.112091	0.741714
FBgn0082968	-0.748709	0.132445	3.21056	0.112118	0.741714
FBgn0020257	1.1315	4.6724	3.20971	0.112165	0.741714
FBgn0023458	0.254811	7.54811	3.19827	0.112218	0.741714
FBgn0085409	1.00382	3.24459	3.20719	0.112284	0.741714
FBgn0004428	0.299576	4.70641	3.1961	0.112322	0.741714
FBgn0030196	-0.327969	1.9895	3.19493	0.112378	0.741714
FBgn0001149	-0.260743	9.4167	3.19342	0.11245	0.741714
FBgn0262167	1.07102	2.83461	3.20304	0.112481	0.741714
FBgn0031189	-0.265325	3.05892	3.18502	0.112852	0.741714
FBgn0050403	-0.603479	4.11133	3.19364	0.112929	0.741714
FBgn0051360	-0.25186	2.62061	3.18198	0.112998	0.741714
FBgn0029935	0.916557	2.72633	3.19159	0.113027	0.741714
FBgn0035699	1.16874	2.57429	3.18855	0.113173	0.741714
FBgn0040285	0.482796	6.02446	3.18783	0.113207	0.741714
FBgn0039161	0.685944	3.59012	3.18765	0.113216	0.741714
FBgn0016715	0.693838	5.65084	3.18739	0.113228	0.741714
FBgn0267390	0.46644	6.31397	3.18592	0.11323	0.741714
FBgn0040068	0.232178	4.81537	3.17646	0.113264	0.741714
FBgn0266429	-0.636781	0.454713	3.18331	0.113293	0.741714
FBgn0036958	0.479733	4.79905	3.18559	0.113314	0.741714
FBgn0013764	0.346047	4.51395	3.17549	0.113382	0.741714
FBgn0038769	0.372982	2.15385	3.17363	0.1134	0.741714
FBgn0028527	0.309479	4.81256	3.17252	0.113454	0.741714
FBgn0013772	-0.526731	3.98835	3.18267	0.113455	0.741714
FBgn0051522	0.257746	6.70922	3.17101	0.113527	0.741714
FBgn0038647	-0.595088	7.64323	3.18088	0.113541	0.741714
FBgn0002441	0.207544	4.71225	3.16794	0.113675	0.741714
FBgn0033999	2.64155	4.46577	3.17423	0.113861	0.741714
FBgn0050345	1.32334	4.70672	3.17147	0.113995	0.741714
FBgn0052198	-0.694587	7.05779	3.17043	0.114045	0.741714
FBgn0060296	0.36869	5.16477	3.164	0.114051	0.741714
FBgn0052423	0.701452	7.47406	3.16911	0.114109	0.741714
FBgn0031011	0.64981	5.79186	3.16884	0.114122	0.741714
FBgn0260970	0.388838	6.89267	3.15921	0.114168	0.741714
FBgn0003651	0.393594	4.39485	3.1637	0.114169	0.741714
FBgn0011289	0.278662	5.60629	3.15744	0.114185	0.741714
FBgn0267431	1.01642	2.30251	3.16559	0.11428	0.741714
FBgn0037297	0.309839	3.17807	3.1555	0.11428	0.741714
FBgn0027363	0.940243	5.36538	3.16495	0.11431	0.741714
FBgn0037094	0.896581	6.56421	3.16494	0.114311	0.741714
FBgn0004860	0.716791	3.68534	3.16315	0.114398	0.741714
FBgn0036501	-0.237831	5.77791	3.1486	0.114617	0.741714
FBgn0033981	-0.366446	5.42052	3.15175	0.114648	0.741714
FBgn0035065	0.707046	3.88654	3.15762	0.114667	0.741714
FBgn0003391	0.814486	6.08841	3.15756	0.11467	0.741714
FBgn0037515	0.637578	5.36731	3.15719	0.114688	0.741714
FBgn0031821	-0.263717	3.98367	3.14571	0.114759	0.741714
FBgn0035283	0.851135	3.58121	3.15203	0.11494	0.741714
FBgn0263864	0.848602	5.28372	3.1514	0.114971	0.741714
FBgn0025815	0.236169	4.1418	3.14056	0.115012	0.741714
FBgn0003308	0.741923	4.73882	3.14937	0.11507	0.741714
FBgn0034162	-0.252737	6.3735	3.13898	0.11509	0.741714
FBgn0001227	1.55313	3.95488	3.14886	0.115095	0.741714
FBgn0036007	-0.352482	6.70018	3.13858	0.115109	0.741714
FBgn0037109	0.447082	4.76818	3.13699	0.115637	0.741714
FBgn0039025	0.362458	3.24574	3.12985	0.115651	0.741714
FBgn0028688	0.488076	6.70367	3.1358	0.115669	0.741714
FBgn0033358	-0.322048	0.60305	3.1264	0.115711	0.741714
FBgn0040777	0.535029	6.407	3.13446	0.115803	0.741714
FBgn0015521	-0.382974	8.97161	3.12169	0.115945	0.741714
FBgn0264895	0.283474	5.77077	3.12011	0.116024	0.741714
FBgn0033352	0.610051	5.67727	3.12934	0.116056	0.741714
FBgn0051633	-0.389202	3.58697	3.12443	0.11609	0.741714
FBgn0039538	-0.384881	3.81904	3.12436	0.116101	0.741714
FBgn0005636	0.382197	2.97005	3.12159	0.116102	0.741714
FBgn0024291	0.231071	5.64153	3.11799	0.116129	0.741714
FBgn0038039	0.248576	4.52509	3.11557	0.11625	0.741714
FBgn0261793	0.677934	6.60544	3.12525	0.116259	0.741714
FBgn0027605	0.302528	5.82279	3.11308	0.116374	0.741714
FBgn0259745	0.640723	4.05801	3.12131	0.116455	0.741714
FBgn0250819	-0.266233	6.64774	3.11026	0.116515	0.741714
FBgn0044871	0.30455	3.70071	3.1096	0.116548	0.741714
FBgn0037153	0.858212	4.15805	3.11561	0.116739	0.741714
FBgn0016081	0.493954	6.62979	3.11506	0.116743	0.741714
FBgn0036896	0.214251	5.69488	3.10513	0.116772	0.741714
FBgn0038302	-0.423204	4.12137	3.11308	0.116794	0.741714
FBgn0035949	-0.665413	3.19498	3.11345	0.116847	0.741714
FBgn0034356	1.63125	5.12649	3.11315	0.116862	0.741714
FBgn0038108	0.602314	5.64147	3.11026	0.117006	0.741714
FBgn0034366	1.32262	3.99295	3.10844	0.117097	0.741714
FBgn0034782	-0.81649	0.874893	3.10531	0.117254	0.741714
FBgn0029891	0.240279	6.46355	3.09461	0.117302	0.741714
FBgn0035249	0.2391	2.77164	3.09417	0.117324	0.741714
FBgn0265274	0.586385	6.4481	3.10216	0.117413	0.741714
FBgn0003969	0.753448	5.1738	3.10208	0.117417	0.741714
FBgn0038166	0.536641	4.06544	3.10195	0.117423	0.741714
FBgn0030035	0.199752	4.97654	3.08731	0.117671	0.741714
FBgn0052369	0.428544	6.16509	3.09242	0.117795	0.741714
FBgn0031256	-0.420478	5.89778	3.09191	0.11782	0.741714
FBgn0029939	0.829778	3.2649	3.09138	0.117957	0.741714
FBgn0086674	0.55798	5.17695	3.08991	0.118031	0.741714
FBgn0032873	-0.243363	4.64823	3.07892	0.118097	0.741714
FBgn0038165	0.719726	1.96894	3.08796	0.118129	0.741714
FBgn0265194	0.302489	5.82255	3.07244	0.118428	0.741714
FBgn0035978	-0.465454	7.30446	3.07635	0.118521	0.741714
FBgn0028343	0.787929	5.13084	3.07974	0.118547	0.741714
FBgn0243514	1.59575	2.87383	3.07915	0.118577	0.741714
FBgn0038429	-0.35491	2.69563	3.06734	0.118717	0.741714
FBgn0039150	0.359295	4.57337	3.06773	0.118825	0.741714
FBgn0262114	0.915241	6.0714	3.07174	0.118955	0.741714
FBgn0015577	-0.244932	6.66846	3.06122	0.119004	0.741714
FBgn0086602	-0.599196	1.99857	3.07036	0.119026	0.741714
FBgn0034628	-0.364382	6.04907	3.06299	0.119098	0.741714
FBgn0039938	0.915499	2.61505	3.06894	0.119099	0.741714
FBgn0034573	0.803031	5.18799	3.06709	0.119194	0.741714
FBgn0031834	-0.284073	2.99822	3.05386	0.119383	0.741714
FBgn0034232	-0.377879	4.42534	3.0587	0.119396	0.741714
FBgn0262531	-0.662113	2.59766	3.06201	0.119455	0.741714
FBgn0034715	1.67519	2.88126	3.06129	0.119492	0.741714
FBgn0266569	1.45362	2.6255	3.0594	0.119589	0.741714
FBgn0085382	0.551976	2.51027	3.05739	0.119692	0.741714
FBgn0033074	0.517828	1.07212	3.05226	0.119702	0.741714
FBgn0029791	0.305311	3.92372	3.04761	0.119706	0.741714
FBgn0036746	0.489998	4.44556	3.05615	0.119757	0.741714
FBgn0014133	0.520946	6.05291	3.05589	0.11977	0.741714
FBgn0013272	0.268538	9.16432	3.04534	0.119824	0.741714
FBgn0035165	0.273004	7.01316	3.04502	0.119841	0.741714
FBgn0264987	-1.34336	4.21242	3.05386	0.119875	0.741714
FBgn0265377	-0.673152	0.121751	3.05045	0.119942	0.741714
FBgn0033194	0.278988	8.54951	3.04012	0.120096	0.741714
FBgn0038173	-0.874789	3.14899	3.04955	0.120098	0.741714
FBgn0052813	0.211823	4.47332	3.03691	0.120263	0.741714
FBgn0029092	1.00905	7.00228	3.04388	0.120392	0.741714
FBgn0030737	-0.427741	7.72307	3.03586	0.120447	0.741714
FBgn0029820	0.649103	6.27588	3.03805	0.120696	0.741714
FBgn0032429	0.477408	3.61897	3.03722	0.120739	0.741714
FBgn0034398	1.1738	7.38361	3.03699	0.120751	0.741714
FBgn0003165	0.623853	6.21918	3.0367	0.120766	0.741714
FBgn0003162	1.08597	6.27594	3.03439	0.120887	0.741714
FBgn0024245	0.973132	2.25281	3.03301	0.120959	0.741714
FBgn0035995	0.648907	5.49436	3.03151	0.121037	0.741714
FBgn0001085	0.647632	4.08083	3.03106	0.121061	0.741714
FBgn0015791	0.502461	4.17819	3.03027	0.121102	0.741714
FBgn0040259	-0.544016	5.59487	3.02804	0.121219	0.741714
FBgn0038846	0.460467	2.72269	3.02538	0.121249	0.741714
FBgn0266518	0.226386	3.85328	3.01482	0.121423	0.741714
FBgn0085391	0.504309	3.40865	3.02344	0.121461	0.741714
FBgn0033388	-0.399067	0.948603	3.01398	0.121467	0.741714
FBgn0034354	-0.268747	4.86606	3.01179	0.121583	0.741714
FBgn0031114	0.31533	2.99531	3.01006	0.121675	0.741714
FBgn0035409	1.01795	2.83384	3.01912	0.121688	0.741714
FBgn0025697	1.51757	4.35887	3.01856	0.121718	0.741714
FBgn0030522	0.367833	2.45523	3.00837	0.121803	0.741714
FBgn0030996	0.598554	4.30728	3.01657	0.121822	0.741714
FBgn0053099	0.655182	3.91426	3.01627	0.121838	0.741714
FBgn0023508	0.211038	4.87855	3.00686	0.121844	0.741714
FBgn0250815	0.285879	11.6386	3.00671	0.121852	0.741714
FBgn0016080	-0.358727	1.41543	3.00635	0.121871	0.741714
FBgn0013751	-0.267681	1.86129	3.00506	0.12194	0.741714
FBgn0023000	0.872288	4.35192	3.0143	0.121942	0.741714
FBgn0001961	0.221864	6.81476	3.00278	0.122061	0.741714
FBgn0035262	0.547698	2.57605	3.01125	0.122104	0.741714
FBgn0029826	0.284637	4.47816	3.00191	0.122107	0.741714
FBgn0259166	0.199325	4.4481	3.00095	0.122158	0.741714
FBgn0016794	0.44687	4.02122	3.01012	0.122163	0.741714
FBgn0036290	-0.211022	5.85081	2.99994	0.122212	0.741714
FBgn0085755	-0.623897	1.07376	3.0092	0.122212	0.741714
FBgn0034617	0.343061	2.81269	2.9999	0.122232	0.741714
FBgn0037931	0.349038	2.58586	2.99669	0.122386	0.741714
FBgn0023097	0.440831	5.5014	3.00487	0.122432	0.741714
FBgn0005624	0.752284	3.5524	3.00483	0.122444	0.741714
FBgn0020762	0.583919	5.41235	3.00205	0.122592	0.741714
FBgn0004403	-0.287502	9.24391	2.99228	0.122621	0.741714
FBgn0000482	0.393635	4.25958	2.99833	0.122639	0.741714
FBgn0037046	-0.606321	1.44311	2.99852	0.12278	0.741714
FBgn0001977	0.786011	5.17758	2.99712	0.122855	0.741714
FBgn0053111	0.401536	4.63831	2.99003	0.123077	0.741714
FBgn0038989	-0.486096	4.89383	2.99213	0.123122	0.741714
FBgn0029848	0.233835	2.0651	2.98165	0.123192	0.741714
FBgn0038861	-0.214498	3.23245	2.98133	0.123209	0.741714
FBgn0034794	-0.262059	4.02206	2.97957	0.123304	0.741714
FBgn0259168	1.04609	5.75712	2.98747	0.123371	0.741714
FBgn0035016	0.470508	4.70925	2.9873	0.123381	0.741714
FBgn0011766	0.488267	5.73421	2.98722	0.123385	0.741714
FBgn0034606	0.766965	3.92985	2.98678	0.123409	0.741714
FBgn0037541	0.226847	7.28005	2.97762	0.123409	0.741714
FBgn0052196	-0.377733	2.94609	2.98033	0.123438	0.741714
FBgn0267668	1.56851	3.13984	2.98409	0.123553	0.741714
FBgn0263973	0.267234	4.29473	2.97465	0.12357	0.741714
FBgn0011758	0.859272	0.714947	2.98295	0.123614	0.741714
FBgn0011474	0.494346	4.0603	2.98219	0.123655	0.741714
FBgn0040717	-0.608444	5.76123	2.97781	0.123891	0.741714
FBgn0085307	-0.703042	5.77641	2.97757	0.123904	0.741714
FBgn0266918	0.384228	4.3586	2.9734	0.12394	0.741714
FBgn0025578	-1.06474	9.52968	2.97687	0.123942	0.741714
FBgn0015609	0.805966	5.7499	2.97111	0.124254	0.741714
FBgn0035142	0.532778	6.73205	2.96703	0.124475	0.741714
FBgn0003520	0.591862	5.24617	2.96688	0.124483	0.741714
FBgn0029913	1.16757	2.77985	2.9655	0.124559	0.741714
FBgn0003175	0.549954	5.6216	2.96518	0.124576	0.741714
FBgn0033264	-0.251893	5.37418	2.95491	0.124643	0.741714
FBgn0027109	-0.48416	1.40435	2.95769	0.124713	0.741714
FBgn0052626	0.626751	7.14797	2.95985	0.124866	0.741714
FBgn0038389	0.17923	3.52594	2.9506	0.124879	0.741714
FBgn0000099	0.708646	4.28997	2.95905	0.124909	0.741714
FBgn0022238	0.410548	4.67132	2.95695	0.124915	0.741714
FBgn0013799	0.381921	3.72848	2.95452	0.124972	0.741714
FBgn0046258	1.7529	2.26253	2.95738	0.125001	0.741714
FBgn0051183	0.861003	4.41334	2.95583	0.125086	0.741714
FBgn0261801	0.411531	2.87233	2.95122	0.125135	0.741714
FBgn0037944	0.742601	3.38671	2.95123	0.125337	0.741714
FBgn0031261	0.613637	2.2994	2.94989	0.125411	0.741714
FBgn0000289	0.357593	5.72222	2.94356	0.125479	0.741714
FBgn0038826	1.58767	7.93339	2.94861	0.125481	0.741714
FBgn0015513	0.199118	6.25932	2.93917	0.125508	0.741714
FBgn0051441	0.314247	0.848958	2.93751	0.125599	0.741714
FBgn0020645	-1.02077	6.04165	2.94538	0.125658	0.741714
FBgn0026147	-0.321326	5.24867	2.93625	0.125708	0.741714
FBgn0034567	-0.288694	0.655492	2.9351	0.125733	0.741714
FBgn0035743	-0.626893	7.48319	2.93969	0.125972	0.741714
FBgn0033713	0.202153	4.26762	2.93022	0.126003	0.741714
FBgn0030364	0.174632	5.53509	2.92839	0.126104	0.741714
FBgn0086661	-1.02981	7.5237	2.93698	0.126122	0.741714
FBgn0010909	0.404706	7.26045	2.92969	0.126155	0.741714
FBgn0259244	0.546696	4.08127	2.93626	0.126161	0.741714
FBgn0035850	0.599666	5.29446	2.93624	0.126162	0.741714
FBgn0040370	-0.27719	2.48102	2.92461	0.126315	0.741714
FBgn0039589	0.325736	3.03335	2.92435	0.126329	0.741714
FBgn0261811	0.820101	4.94773	2.93289	0.126348	0.741714
FBgn0265784	0.209831	5.55895	2.92386	0.126356	0.741714
FBgn0042105	-0.42114	4.19585	2.9297	0.126483	0.741714
FBgn0038809	0.883151	5.43533	2.93034	0.126489	0.741714
FBgn0045800	-0.414879	3.4575	2.92806	0.126506	0.741714
FBgn0038295	-0.484896	0.482652	2.91884	0.126674	0.741714
FBgn0085224	-0.258651	2.50728	2.9178	0.126694	0.741714
FBgn0051636	1.9529	1.64807	2.92196	0.126955	0.741714
FBgn0029979	0.64655	6.43005	2.92143	0.126985	0.741714
FBgn0259876	0.688071	3.93837	2.91789	0.127182	0.741714
FBgn0029006	0.241338	5.65805	2.90874	0.127202	0.741714
FBgn0034009	0.442405	4.6928	2.91733	0.127203	0.741714
FBgn0039560	0.391876	3.85065	2.91375	0.127288	0.741714
FBgn0052576	-0.309688	3.9728	2.90645	0.127365	0.741714
FBgn0036032	0.402143	3.92595	2.91211	0.127396	0.741714
FBgn0002641	-0.280094	4.33057	2.90413	0.127461	0.741714
FBgn0002543	1.05757	4.04337	2.91138	0.127546	0.741714
FBgn0008646	0.953003	1.01662	2.91137	0.127547	0.741714
FBgn0032187	-0.367623	6.26539	2.90562	0.127563	0.741714
FBgn0031888	1.04442	1.65895	2.91059	0.127591	0.741714
FBgn0000117	0.446041	7.72636	2.9053	0.127633	0.741714
FBgn0010452	0.843136	3.35365	2.90934	0.127661	0.741714
FBgn0041183	1.40598	3.8276	2.90641	0.127826	0.741714
FBgn0003892	0.643666	3.66495	2.90507	0.127901	0.741714
FBgn0031571	0.48085	6.69076	2.90315	0.127992	0.741714
FBgn0002571	-0.774626	7.5394	2.90285	0.128026	0.741714
FBgn0029823	0.810541	7.67473	2.90257	0.128042	0.741714
FBgn0261649	0.789503	3.27151	2.9025	0.128046	0.741714
FBgn0036666	0.493955	4.99258	2.90075	0.128145	0.741714
FBgn0037602	-0.464042	3.26695	2.89941	0.128221	0.741714
FBgn0035027	0.186793	3.32259	2.89046	0.128234	0.741714
FBgn0005660	-0.378065	0.608493	2.88908	0.128312	0.741714
FBgn0063923	0.534015	3.67546	2.89714	0.128349	0.741714
FBgn0039489	-0.232947	2.35958	2.88678	0.128443	0.741714
FBgn0266282	-0.23174	3.62582	2.88522	0.128532	0.741714
FBgn0028899	1.03411	1.42329	2.89171	0.128657	0.741714
FBgn0039776	-0.323616	6.32154	2.88233	0.128697	0.741714
FBgn0261277	0.314169	3.59766	2.88116	0.128802	0.741714
FBgn0011723	0.392459	1.74286	2.88067	0.128818	0.741714
FBgn0011710	0.711559	5.06485	2.88871	0.128827	0.741714
FBgn0028743	0.464489	4.08124	2.88841	0.128844	0.741714
FBgn0036228	-0.367363	3.16814	2.88241	0.128878	0.741714
FBgn0263072	0.856741	2.46998	2.88672	0.12894	0.741714
FBgn0020445	1.62075	5.11993	2.88618	0.128971	0.741714
FBgn0029976	0.659512	4.23911	2.88556	0.129006	0.741714
FBgn0004391	0.324379	4.52868	2.87767	0.129014	0.741714
FBgn0033221	-0.251104	6.23937	2.87646	0.129032	0.741714
FBgn0031381	0.751969	5.67013	2.88446	0.129069	0.741714
FBgn0265102	1.01662	1.17736	2.88339	0.12913	0.741714
FBgn0267035	-0.599939	2.7016	2.88272	0.129168	0.741714
FBgn0039690	-0.289922	6.34581	2.87271	0.129247	0.741714
FBgn0267029	0.888571	0.855148	2.88038	0.129301	0.741714
FBgn0031485	-0.339654	3.31748	2.86741	0.129643	0.741714
FBgn0032131	-0.99871	4.0415	2.86918	0.129943	0.741714
FBgn0035497	-0.406677	5.33083	2.86631	0.129999	0.741714
FBgn0053087	0.794787	7.47849	2.86791	0.130016	0.741714
FBgn0037370	0.909922	5.67191	2.86495	0.130187	0.741714
FBgn0041203	0.457005	4.24788	2.86486	0.130192	0.741714
FBgn0038070	0.623653	2.16494	2.86418	0.130231	0.741714
FBgn0043458	0.249784	5.43485	2.85322	0.130372	0.741714
FBgn0001147	0.346868	0.599787	2.85259	0.130408	0.741714
FBgn0026634	-0.249063	4.71147	2.84616	0.130782	0.741714
FBgn0028837	0.223572	4.37657	2.84582	0.130802	0.741714
FBgn0260943	0.667729	4.15507	2.85363	0.130841	0.741714
FBgn0034914	0.725107	6.74682	2.85311	0.130872	0.741714
FBgn0037933	1.08106	4.51435	2.85062	0.131016	0.741714
FBgn0000287	0.788521	2.76364	2.84995	0.131055	0.741714
FBgn0054034	-0.518279	0.236841	2.84145	0.131134	0.741714
FBgn0031424	-0.221149	4.70357	2.83978	0.131155	0.741714
FBgn0001189	0.305178	4.5231	2.83977	0.131155	0.741714
FBgn0034045	-0.645785	4.99834	2.84752	0.131197	0.741714
FBgn0038584	-0.241647	4.37671	2.83875	0.131215	0.741714
FBgn0263466	-0.3727	0.67679	2.83821	0.131246	0.741714
FBgn0036141	0.702213	3.79577	2.84607	0.131281	0.741714
FBgn0035193	-0.703464	5.12775	2.84599	0.131286	0.741714
FBgn0029867	0.236989	5.08788	2.83686	0.131326	0.741714
FBgn0034803	-0.417477	4.32327	2.84409	0.131354	0.741714
FBgn0031678	-0.194253	4.01655	2.83469	0.131453	0.741714
FBgn0023215	0.82001	5.11236	2.84158	0.131543	0.741714
FBgn0266756	0.298535	7.34679	2.83118	0.131659	0.741714
FBgn0040752	0.624684	6.34144	2.83859	0.131718	0.741714
FBgn0051729	0.223017	7.05742	2.82839	0.131823	0.741714
FBgn0039501	0.903833	0.56524	2.8333	0.132028	0.741714
FBgn0004888	-0.345451	8.66418	2.8241	0.132076	0.741714
FBgn0034819	-0.501765	5.97625	2.83071	0.13218	0.741714
FBgn0000527	1.42654	5.97296	2.83064	0.132184	0.741714
FBgn0037050	-0.352728	0.55926	2.81921	0.132365	0.741714
FBgn0039218	-0.376458	4.77192	2.82382	0.132376	0.741714
FBgn0259219	0.652796	3.32977	2.82346	0.132607	0.741714
FBgn0030858	0.201196	4.88013	2.81295	0.132737	0.741714
FBgn0262801	-0.275612	7.02004	2.81079	0.132865	0.741714
FBgn0001296	0.979228	3.62132	2.81817	0.13292	0.741714
FBgn0259676	-0.301465	2.92179	2.80938	0.132949	0.741714
FBgn0041607	-0.386858	5.0051	2.8126	0.133089	0.741714
FBgn0035986	0.884307	3.20767	2.81215	0.133278	0.741714
FBgn0015801	0.435771	5.42046	2.8119	0.133292	0.741714
FBgn0035964	0.999033	7.21581	2.80839	0.133501	0.741714
FBgn0030791	0.455263	5.22036	2.80514	0.133695	0.741714
FBgn0038337	-0.316142	5.67716	2.79667	0.133778	0.741714
FBgn0035484	-0.306834	6.83544	2.7943	0.133851	0.741714
FBgn0033466	0.454574	5.75604	2.80092	0.133947	0.741714
FBgn0027287	0.282223	6.29118	2.79239	0.133966	0.741714
FBgn0032409	0.374414	4.01002	2.79645	0.134041	0.741714
FBgn0036956	-0.442873	3.74207	2.79667	0.134202	0.741714
FBgn0031494	-0.620796	3.12958	2.79597	0.134244	0.741714
FBgn0030638	0.265583	2.88826	2.78724	0.134276	0.741714
FBgn0040571	-0.60132	1.56487	2.7945	0.134332	0.741714
FBgn0030341	-0.279136	5.8133	2.78625	0.134336	0.741714
FBgn0030054	0.365503	2.88405	2.7868	0.134456	0.741714
FBgn0004597	-0.179594	3.66458	2.78392	0.134476	0.741714
FBgn0039350	0.44138	3.96005	2.79114	0.134535	0.741714
FBgn0044323	0.413891	5.87252	2.79037	0.134537	0.741714
FBgn0032330	0.649026	5.66787	2.79098	0.134544	0.741714
FBgn0087039	0.420062	3.12665	2.78794	0.134618	0.741714
FBgn0034564	-0.288713	4.31249	2.77858	0.1348	0.741714
FBgn0261396	0.595996	6.85224	2.7846	0.134929	0.741714
FBgn0031998	-0.225361	4.54151	2.77533	0.134997	0.741714
FBgn0038815	1.22499	0.964762	2.78263	0.135048	0.741714
FBgn0053969	-0.184759	3.26869	2.77323	0.135125	0.741714
FBgn0030555	0.469074	3.78844	2.78074	0.135163	0.741714
FBgn0039135	0.739984	4.51753	2.77508	0.135506	0.741714
FBgn0035309	-0.59561	4.36442	2.77486	0.135519	0.741714
FBgn0004512	-0.25767	6.39216	2.7667	0.135523	0.741714
FBgn0263930	0.391798	6.14297	2.77062	0.13562	0.741714
FBgn0045761	0.702738	5.12215	2.77226	0.135678	0.741714
FBgn0086664	-0.39333	1.22459	2.76178	0.135824	0.741714
FBgn0086768	0.446082	4.44152	2.76941	0.135851	0.741714
FBgn0000578	0.641538	4.7514	2.76933	0.135856	0.741714
FBgn0004360	0.737389	1.61359	2.76915	0.135867	0.741714
FBgn0030963	0.307522	1.54317	2.76036	0.135911	0.741714
FBgn0000633	0.47563	2.5615	2.7677	0.135941	0.741714
FBgn0011704	-0.244418	6.07832	2.75951	0.135963	0.741714
FBgn0032733	0.72833	4.00776	2.76511	0.136114	0.741714
FBgn0031997	-0.216115	3.2281	2.75683	0.136127	0.741714
FBgn0020644	-1.17927	1.66746	2.7639	0.136188	0.741714
FBgn0023172	0.56144	7.13735	2.76382	0.136193	0.741714
FBgn0029148	-0.501521	5.69093	2.76366	0.136203	0.741714
FBgn0028990	0.176952	6.0022	2.75292	0.136368	0.741714
FBgn0015905	-0.310106	3.70875	2.74967	0.136611	0.741714
FBgn0030034	0.544558	4.61699	2.75685	0.13662	0.741714
FBgn0001276	0.402503	2.39327	2.75149	0.136669	0.741714
FBgn0035542	0.923619	5.87601	2.75595	0.136676	0.741714
FBgn0260959	0.640944	4.10604	2.755	0.136734	0.741714
FBgn0004629	-0.420327	7.69142	2.74867	0.136816	0.741714
FBgn0004197	0.535036	4.69724	2.75269	0.136876	0.741714
FBgn0264699	-0.351962	3.21462	2.74591	0.13698	0.741714
FBgn0261574	0.545542	6.9905	2.75082	0.136991	0.741714
FBgn0263608	-0.51378	0.13945	2.73883	0.137309	0.741714
FBgn0030347	-0.514948	3.78143	2.74489	0.137357	0.741714
FBgn0032221	-0.254429	1.8383	2.73461	0.137502	0.741714
FBgn0030946	0.247293	4.83353	2.73424	0.137525	0.741714
FBgn0039844	0.537403	6.62391	2.74214	0.137528	0.741714
FBgn0039817	1.00062	1.94315	2.74204	0.137534	0.741714
FBgn0037883	-0.540152	3.21488	2.74136	0.137576	0.741714
FBgn0030398	-0.966943	4.67426	2.74118	0.137588	0.741714
FBgn0029114	0.631519	5.39538	2.74002	0.13766	0.741714
FBgn0036134	0.177919	4.84459	2.73158	0.137691	0.741714
FBgn0015351	-0.230683	2.66512	2.73091	0.137733	0.741714
FBgn0030654	0.282632	1.80339	2.73072	0.137745	0.741714
FBgn0035424	0.437933	7.08266	2.73433	0.137828	0.741714
FBgn0051538	0.579668	1.80623	2.73679	0.13786	0.741714
FBgn0051278	-0.351606	2.80909	2.72991	0.137886	0.741714
FBgn0014342	-0.270121	1.88832	2.72773	0.137932	0.741714
FBgn0032774	0.495873	6.29177	2.73382	0.138045	0.741714
FBgn0069242	-0.273868	6.15092	2.72566	0.138061	0.741714
FBgn0028425	-0.199949	4.87585	2.72495	0.138105	0.741714
FBgn0026179	0.429898	6.44918	2.72856	0.138263	0.741714
FBgn0259145	0.274809	2.36187	2.72194	0.138294	0.741714
FBgn0051217	0.400534	3.84646	2.72856	0.138304	0.741714
FBgn0030466	0.678312	4.04605	2.72936	0.138323	0.741714
FBgn0028422	-0.391181	3.94038	2.72679	0.138374	0.741714
FBgn0031092	0.515285	5.86033	2.72801	0.138408	0.741714
FBgn0000577	0.920872	1.92417	2.72623	0.138519	0.741714
FBgn0039476	1.77272	1.36843	2.72338	0.138697	0.741714
FBgn0037980	0.385833	2.92261	2.71933	0.138722	0.741714
FBgn0036516	0.534692	5.67953	2.72112	0.138839	0.741714
FBgn0039766	-0.215334	2.21025	2.71322	0.138843	0.741714
FBgn0037074	0.535112	5.76574	2.71991	0.138915	0.741714
FBgn0004556	-0.403822	4.04186	2.71792	0.138999	0.741714
FBgn0260399	0.801096	1.61715	2.71677	0.139112	0.741714
FBgn0061469	0.826824	4.61849	2.71541	0.139198	0.741714
FBgn0031752	0.544227	5.51378	2.71412	0.13928	0.741714
FBgn0033051	0.314096	4.28886	2.70714	0.139299	0.741714
FBgn0039705	-0.192074	4.80222	2.70198	0.139554	0.741714
FBgn0023531	0.459978	3.47113	2.70911	0.139596	0.741714
FBgn0052150	-0.475365	-0.0785139	2.70023	0.139665	0.741714
FBgn0045064	1.38188	4.78407	2.70143	0.140082	0.741714
FBgn0030530	0.612331	3.93388	2.70131	0.14009	0.741714
FBgn0028582	0.974854	7.05972	2.70092	0.140115	0.741714
FBgn0005427	0.649381	4.62906	2.70039	0.140148	0.741714
FBgn0037697	-0.306728	5.62231	2.69332	0.140157	0.741714
FBgn0019637	0.49768	4.5514	2.70013	0.140166	0.741714
FBgn0030915	0.310362	1.97499	2.69234	0.140168	0.741714
FBgn0030258	0.353151	0.795856	2.69193	0.140194	0.741714
FBgn0038235	-0.244456	2.41096	2.69113	0.140245	0.741714
FBgn0039459	0.36721	1.55688	2.69027	0.1403	0.741714
FBgn0038416	-0.377097	4.19953	2.69285	0.140491	0.741714
FBgn0085485	-0.518312	1.10701	2.69199	0.140523	0.741714
FBgn0010497	-0.295397	6.79682	2.68577	0.140589	0.741714
FBgn0032077	-0.869777	3.46138	2.69345	0.14059	0.741714
FBgn0016684	-0.350644	5.5557	2.68968	0.140602	0.741714
FBgn0030053	0.474291	4.09724	2.69262	0.140644	0.741714
FBgn0003866	0.480194	5.15332	2.69086	0.140756	0.741714
FBgn0034599	0.254303	2.47182	2.68146	0.140865	0.741714
FBgn0035631	0.304992	6.37196	2.68114	0.140886	0.741714
FBgn0039274	-0.35546	4.02139	2.68505	0.140914	0.741714
FBgn0262964	-1.00627	4.79427	2.68727	0.140986	0.741714
FBgn0031820	0.422449	5.02413	2.68562	0.141081	0.741714
FBgn0261020	-0.240487	5.94966	2.67799	0.141088	0.741714
FBgn0013762	0.28207	3.78672	2.67757	0.141115	0.741714
FBgn0026323	0.294278	5.59692	2.67547	0.141278	0.741714
FBgn0002284	0.378991	6.61627	2.67731	0.14133	0.741714
FBgn0032895	-0.203308	2.37993	2.6722	0.141462	0.741714
FBgn0036615	-0.228505	3.68498	2.67139	0.141515	0.741714
FBgn0004456	0.179464	6.21653	2.66919	0.141657	0.741714
FBgn0038476	1.01777	4.37452	2.67575	0.141726	0.741714
FBgn0029123	0.691693	3.89569	2.67518	0.141763	0.741714
FBgn0038366	1.5824	4.41539	2.67228	0.141951	0.741714
FBgn0264857	0.423001	1.38571	2.66597	0.141957	0.741714
FBgn0000286	0.571221	4.52455	2.67171	0.141988	0.741714
FBgn0032298	-0.440874	5.28239	2.67086	0.142043	0.741714
FBgn0033926	0.626674	9.67693	2.66761	0.142253	0.741714
FBgn0260400	0.426705	5.67633	2.66597	0.14236	0.741714
FBgn0044510	-0.523641	6.18034	2.66455	0.142451	0.741714
FBgn0035983	1.15646	4.6638	2.66241	0.142591	0.741714
FBgn0038140	0.456827	0.555816	2.65469	0.142639	0.741714
FBgn0016038	0.195026	4.6734	2.65343	0.142683	0.741714
FBgn0085803	-0.731512	2.04519	2.66044	0.142719	0.741714
FBgn0032000	0.43988	4.35104	2.66002	0.142747	0.741714
FBgn0024321	0.463055	3.40976	2.65948	0.142781	0.741714
FBgn0036518	0.407065	4.76201	2.6572	0.142861	0.741714
FBgn0032741	0.861303	0.861848	2.65621	0.142995	0.741714
FBgn0004839	0.982408	3.41842	2.65548	0.143043	0.741714
FBgn0031603	0.277021	1.83162	2.64774	0.143056	0.741714
FBgn0025626	0.234782	4.40076	2.64774	0.143056	0.741714
FBgn0032348	0.544623	4.31576	2.65462	0.143099	0.741714
FBgn0039755	0.420359	3.68895	2.65412	0.143131	0.741714
FBgn0250754	0.707016	6.11099	2.65315	0.143195	0.741714
FBgn0039492	0.510974	5.92146	2.65293	0.143209	0.741714
FBgn0030816	0.564851	4.66041	2.65194	0.143274	0.741714
FBgn0032281	1.23366	3.66878	2.65074	0.143353	0.741714
FBgn0034110	0.754966	5.44989	2.65041	0.143374	0.741714
FBgn0036804	-0.186413	3.20987	2.64282	0.143379	0.741714
FBgn0027948	0.473129	6.57102	2.64988	0.143409	0.741714
FBgn0051759	-0.323993	3.63465	2.64386	0.143441	0.741714
FBgn0030485	0.510748	2.43748	2.64873	0.143484	0.741714
FBgn0036364	0.596264	4.74838	2.64698	0.143599	0.741714
FBgn0022338	-0.264389	4.21117	2.63924	0.143615	0.741714
FBgn0024734	-0.237074	7.69733	2.63856	0.14366	0.741714
FBgn0037235	0.750768	4.29747	2.6455	0.143696	0.741714
FBgn0037339	0.766724	4.86012	2.64418	0.143783	0.741714
FBgn0037128	-0.723676	6.99822	2.643	0.143861	0.741714
FBgn0015795	0.582678	6.63396	2.64297	0.143863	0.741714
FBgn0051739	0.199732	6.0586	2.63436	0.143938	0.741714
FBgn0260749	0.754726	4.477	2.64169	0.143947	0.741714
FBgn0030558	-0.319679	6.03319	2.6342	0.144039	0.741714
FBgn0032683	0.345933	5.1749	2.63451	0.144149	0.741714
FBgn0262731	-0.320811	4.2109	2.63303	0.144155	0.741714
FBgn0013720	0.37684	3.93899	2.63605	0.14421	0.741714
FBgn0259234	0.318798	4.71301	2.63107	0.144232	0.741714
FBgn0263398	-0.166383	4.86561	2.62988	0.144234	0.741714
FBgn0082831	0.495457	5.15087	2.63705	0.144253	0.741714
FBgn0261437	-0.183753	3.93575	2.62893	0.144298	0.741714
FBgn0010051	0.362422	6.32887	2.63144	0.144344	0.741714
FBgn0028647	0.510899	3.49059	2.63541	0.144362	0.741714
FBgn0038597	-0.354128	4.66835	2.63048	0.144459	0.741714
FBgn0031702	0.360291	5.25689	2.63076	0.144466	0.741714
FBgn0021776	0.26121	2.81974	2.62353	0.144657	0.741714
FBgn0039637	0.492643	6.18088	2.63064	0.144677	0.741714
FBgn0028399	0.715022	6.33799	2.63019	0.144707	0.741714
FBgn0034761	0.362344	2.35188	2.62312	0.144756	0.741714
FBgn0030680	0.306455	3.9824	2.6204	0.144935	0.741714
FBgn0033000	-0.251824	4.69839	2.61871	0.144978	0.741714
FBgn0032668	-0.379825	2.50583	2.62141	0.144984	0.741714
FBgn0025678	-0.417622	8.08144	2.62111	0.145004	0.741714
FBgn0003575	0.247658	5.8145	2.61743	0.145064	0.741714
FBgn0029756	0.326885	2.69686	2.61607	0.145182	0.741714
FBgn0264357	0.290065	6.85236	2.61531	0.145206	0.741714
FBgn0053505	-0.475091	4.00126	2.62228	0.145234	0.741714
FBgn0031497	-0.394477	7.05053	2.61758	0.145257	0.741714
FBgn0032196	-0.273397	4.52919	2.61432	0.145272	0.741714
FBgn0262866	0.258224	4.14959	2.61421	0.14528	0.741714
FBgn0011802	0.421165	3.12832	2.61933	0.145389	0.741714
FBgn0005658	0.989854	0.865649	2.61901	0.145452	0.741714
FBgn0002638	-0.340684	6.13675	2.61417	0.145468	0.741714
FBgn0029709	-0.233993	6.83091	2.61097	0.145496	0.741714
FBgn0034240	0.403115	5.88793	2.61685	0.145554	0.741714
FBgn0033212	0.699458	6.59538	2.61679	0.1456	0.741714
FBgn0010105	0.544749	1.55599	2.61512	0.145711	0.741714
FBgn0260941	0.510295	5.15287	2.61505	0.145717	0.741714
FBgn0262714	0.398866	5.15849	2.61264	0.145809	0.741714
FBgn0034786	0.821928	5.55162	2.61365	0.14581	0.741714
FBgn0038816	0.459506	4.56611	2.61308	0.145848	0.741714
FBgn0052580	1.09842	1.11333	2.61299	0.145855	0.741714
FBgn0040493	0.721702	6.77059	2.61081	0.146	0.741714
FBgn0262937	0.655675	3.60556	2.60796	0.146192	0.741714
FBgn0052726	0.507872	1.05254	2.60111	0.146469	0.741714
FBgn0086361	-0.231127	6.88715	2.5956	0.146533	0.741714
FBgn0036697	-0.27736	5.2062	2.59489	0.146581	0.741714
FBgn0040729	-0.584583	3.13559	2.6021	0.146586	0.741714
FBgn0030137	-0.315487	2.10437	2.59313	0.146701	0.741714
FBgn0027793	-0.440127	2.06183	2.59708	0.146742	0.741714
FBgn0035603	-0.404697	5.28757	2.59879	0.146787	0.741714
FBgn0031457	0.758444	2.69738	2.59876	0.146812	0.741714
FBgn0030245	0.444668	6.48769	2.59745	0.146883	0.741714
FBgn0027561	0.446478	5.28013	2.59641	0.146971	0.741714
FBgn0052107	-0.619186	2.79011	2.59625	0.146982	0.741714
FBgn0032482	-0.273899	7.12991	2.5876	0.147077	0.741714
FBgn0004509	0.24043	6.68697	2.58564	0.147211	0.741714
FBgn0030607	1.1589	1.57501	2.59084	0.14735	0.741714
FBgn0024806	0.543432	6.00541	2.59074	0.147356	0.741714
FBgn0020414	0.312764	6.78454	2.58303	0.147389	0.741714
FBgn0026181	0.525776	6.17033	2.59015	0.147396	0.741714
FBgn0031286	-0.261321	3.40787	2.58287	0.1474	0.741714
FBgn0028906	0.423588	1.78489	2.58581	0.147401	0.741714
FBgn0033781	0.312863	3.23224	2.58315	0.147419	0.741714
FBgn0263260	-0.51638	7.07424	2.58935	0.147451	0.741714
FBgn0034814	-0.233165	3.52787	2.58044	0.147566	0.741714
FBgn0035763	0.487866	6.28285	2.58708	0.147605	0.741714
FBgn0001206	0.458826	2.43435	2.58582	0.14765	0.741714
FBgn0035523	0.188403	5.45739	2.57749	0.147767	0.741714
FBgn0034626	0.350449	1.69408	2.57636	0.147845	0.741714
FBgn0017551	0.738804	2.05812	2.58255	0.147914	0.741714
FBgn0035421	0.163422	4.85988	2.57374	0.148025	0.741714
FBgn0030851	-0.391586	3.69743	2.5797	0.14804	0.741714
FBgn0036827	0.348617	2.89797	2.57397	0.148153	0.741714
FBgn0033062	0.213061	5.96054	2.57142	0.148184	0.741714
FBgn0026250	-0.245998	8.20573	2.57109	0.148207	0.741714
FBgn0262742	0.530851	5.41058	2.57813	0.148216	0.741714
FBgn0033391	-0.607607	0.343026	2.57677	0.148228	0.741714
FBgn0034959	0.32503	1.99952	2.57024	0.148265	0.741714
FBgn0085407	0.740264	2.83173	2.5755	0.148397	0.741714
FBgn0038577	0.383339	5.03112	2.57328	0.14844	0.741714
FBgn0013759	0.269049	5.37119	2.5656	0.148585	0.741714
FBgn0002921	0.231586	8.59417	2.56487	0.148635	0.741714
FBgn0015570	-0.252369	5.19049	2.56388	0.148704	0.741714
FBgn0029133	-0.268945	6.85245	2.56284	0.148776	0.741714
FBgn0000052	0.869106	6.34148	2.56975	0.148792	0.741714
FBgn0040929	0.293337	2.0171	2.56243	0.148805	0.741714
FBgn0036423	-0.423415	0.0801699	2.56194	0.148838	0.741714
FBgn0085339	-0.62697	3.07141	2.56901	0.148843	0.741714
FBgn0042174	0.591216	8.02336	2.56662	0.149008	0.741714
FBgn0052075	-0.320057	4.1841	2.56117	0.149045	0.741714
FBgn0023407	0.61584	5.56264	2.56425	0.149171	0.741714
FBgn0029157	0.412997	5.29045	2.56247	0.149294	0.741714
FBgn0261530	-0.204186	3.60522	2.55407	0.149384	0.741714
FBgn0050438	0.419454	4.35853	2.55956	0.149495	0.741714
FBgn0033915	-0.223263	5.15373	2.55239	0.149501	0.741714
FBgn0260793	0.396977	2.83263	2.55652	0.149546	0.741714
[truncated: 8,086 more rows]

## Sheet: All genes S–W– vs. S–Lh T2
Differential expression analysis: Result of edgeR corresponding to the S–W– vs. S–Lh comparision at T2 (72 hours post wasp attack). log2FC is reported
Gene_id	logFC	logCPM	F	PValue	FDR
FBgn0267111	3.2522	3.37648	159.285	2.77609e-06	0.0152727
FBgn0037684	1.67683	5.07876	139.998	4.39232e-06	0.0152727
FBgn0039073	-1.83194	5.86243	113.257	9.27645e-06	0.0152727
FBgn0040319	1.29342	6.32804	110.848	1.00026e-05	0.0152727
FBgn0037280	1.934	1.72991	103.147	1.28661e-05	0.0152727
FBgn0046114	1.47964	6.35868	101.31	1.36983e-05	0.0152727
FBgn0001325	1.33317	5.00081	93.5297	1.80851e-05	0.0152727
FBgn0037665	-2.47262	3.17562	93.4071	1.81675e-05	0.0152727
FBgn0085325	-2.8904	5.77009	91.0252	1.98684e-05	0.0152727
FBgn0052170	1.1871	3.33648	86.5977	2.36047e-05	0.0152727
FBgn0033708	1.52953	4.92474	83.6046	2.6646e-05	0.0152727
FBgn0035859	1.74821	1.19903	80.975	2.97398e-05	0.0152727
FBgn0051781	1.01285	4.72194	79.3151	3.19298e-05	0.0152727
FBgn0026077	1.9017	6.79037	78.6148	3.2915e-05	0.0152727
FBgn0037742	-1.17394	3.00784	77.7693	3.41565e-05	0.0152727
FBgn0015520	-0.925034	4.50805	77.4993	3.45654e-05	0.0152727
FBgn0010263	1.22601	6.91382	76.8836	3.55215e-05	0.0152727
FBgn0035186	1.24705	2.94396	76.4013	3.6294e-05	0.0152727
FBgn0264746	-2.26789	1.85593	75.9493	3.70373e-05	0.0152727
FBgn0034500	-0.790306	3.72537	74.9081	3.88247e-05	0.0152727
FBgn0030065	0.751376	5.661	73.9638	4.05416e-05	0.0152727
FBgn0029690	1.73126	3.54407	73.4773	4.14637e-05	0.0152727
FBgn0039593	-2.51512	6.60312	71.9778	4.44788e-05	0.0152727
FBgn0083972	1.30124	5.00634	71.7209	4.50228e-05	0.0152727
FBgn0033387	1.8582	2.57394	71.5735	4.5339e-05	0.0152727
FBgn0032010	1.22087	5.40356	71.2043	4.61431e-05	0.0152727
FBgn0028988	-1.21687	4.65902	70.6548	4.73736e-05	0.0152727
FBgn0034784	0.916094	4.89415	70.4053	4.7946e-05	0.0152727
FBgn0051642	-1.45945	4.02632	70.3073	4.81734e-05	0.0152727
FBgn0027654	0.734765	4.81017	69.9834	4.89341e-05	0.0152727
FBgn0039886	-1.07456	3.81876	69.9195	4.9086e-05	0.0152727
FBgn0037553	-1.24448	4.7065	69.3886	5.03719e-05	0.0152727
FBgn0030607	0.990068	3.22348	69.3796	5.03938e-05	0.0152727
FBgn0032156	1.17195	6.46171	69.0071	5.13221e-05	0.0152727
FBgn0031069	1.11516	6.0486	68.2078	5.3388e-05	0.0152727
FBgn0035623	-1.14121	2.88885	67.8057	5.44675e-05	0.0152727
FBgn0050118	1.19368	5.10295	67.4171	5.5537e-05	0.0152727
FBgn0030586	-2.17741	6.08044	66.9996	5.67158e-05	0.0152727
FBgn0034221	-2.39101	4.93716	66.3353	5.86581e-05	0.0152727
FBgn0033458	2.30439	4.22376	66.1302	5.92745e-05	0.0152727
FBgn0040102	-1.68662	3.79502	65.9274	5.98926e-05	0.0152727
FBgn0037396	-4.76431	5.28462	66.0251	6.58236e-05	0.0152727
FBgn0038874	1.51687	3.05387	63.9874	6.62372e-05	0.0152727
FBgn0038391	1.03014	4.48194	63.5924	6.76322e-05	0.0152727
FBgn0052243	-0.987014	4.67782	63.5272	6.78658e-05	0.0152727
FBgn0261446	1.19693	5.81208	63.3624	6.84615e-05	0.0152727
FBgn0039778	1.61719	8.26525	63.3209	6.86123e-05	0.0152727
FBgn0025620	1.85758	7.40655	63.1255	6.93294e-05	0.0152727
FBgn0010223	1.19744	4.22805	62.892	7.01984e-05	0.0152727
FBgn0010381	-3.00096	5.54123	62.8874	7.02158e-05	0.0152727
FBgn0015766	1.35215	9.08758	62.7233	7.08351e-05	0.0152727
FBgn0031548	1.26729	4.26654	62.5239	7.15969e-05	0.0152727
FBgn0033439	-3.01001	6.12041	61.1184	7.72732e-05	0.0152727
FBgn0037503	1.94226	2.08262	60.7288	7.8947e-05	0.0152727
FBgn0044812	2.91926	0.593471	60.706	7.9046e-05	0.0152727
FBgn0027341	0.963131	8.11344	60.1715	8.1422e-05	0.0152727
FBgn0034914	-1.74944	8.05797	59.6951	8.36163e-05	0.0152727
FBgn0030927	-1.79716	2.98409	58.8402	8.77463e-05	0.0152727
FBgn0035041	-1.59554	2.42284	58.7715	8.80893e-05	0.0152727
FBgn0053120	0.956309	5.66611	58.6469	8.87156e-05	0.0152727
FBgn0036769	0.839977	4.51905	57.5961	9.42302e-05	0.0152727
FBgn0033635	-1.46267	6.64179	57.5665	9.4392e-05	0.0152727
FBgn0003295	-1.86828	1.01152	57.3982	9.53169e-05	0.0152727
FBgn0030334	-1.02173	4.53797	57.2654	9.60552e-05	0.0152727
FBgn0053080	1.3303	6.22201	57.1035	9.69652e-05	0.0152727
FBgn0026787	0.62452	5.36618	57.0697	9.71567e-05	0.0152727
FBgn0086558	-1.06994	10.2298	57.038	9.73363e-05	0.0152727
FBgn0040850	-1.30421	5.06052	56.9576	9.77946e-05	0.0152727
FBgn0033820	1.40987	4.84671	56.6907	9.9335e-05	0.0152727
FBgn0259878	-1.69161	2.73945	56.6385	9.96404e-05	0.0152727
FBgn0266742	0.93581	3.60636	55.4221	0.000107094	0.0152727
FBgn0259140	1.36866	5.9975	55.1894	0.0001086	0.0152727
FBgn0029723	1.17713	3.01792	55.0218	0.000109701	0.0152727
FBgn0035398	1.44657	7.39543	54.7928	0.000111229	0.0152727
FBgn0030608	0.811705	7.50955	54.7121	0.000111774	0.0152727
FBgn0086358	0.651439	5.31035	54.6258	0.00011236	0.0152727
FBgn0038877	0.627447	6.37904	54.3262	0.000114427	0.0152727
FBgn0260474	-3.04578	6.15564	54.1657	0.000115553	0.0152727
FBgn0036587	-2.62533	5.36232	54.1606	0.000115589	0.0152727
FBgn0036765	0.936866	4.52869	54.1563	0.00011562	0.0152727
FBgn0032280	2.47003	9.06962	54.0671	0.000116253	0.0152727
FBgn0041342	1.0018	6.12789	53.9584	0.00011703	0.0152727
FBgn0260653	1.06499	7.39813	53.9524	0.000117072	0.0152727
FBgn0260768	-2.40671	1.56751	53.5665	0.000119886	0.0152727
FBgn0037975	-1.78808	5.53532	53.2745	0.000122073	0.0152727
FBgn0034505	-1.69008	1.85587	52.677	0.000126706	0.0152727
FBgn0001083	1.05482	5.6773	52.5973	0.000127342	0.0152727
FBgn0030326	-3.52243	9.55227	52.5785	0.000127492	0.0152727
FBgn0001967	-2.30269	2.15932	52.5046	0.000128085	0.0152727
FBgn0038237	1.852	4.24239	52.4945	0.000128167	0.0152727
FBgn0263776	1.05969	4.43573	52.304	0.000129713	0.0152727
FBgn0051777	-2.61579	3.30134	52.2334	0.000130292	0.0152727
FBgn0030679	0.81613	5.5365	51.8698	0.000133328	0.0152727
FBgn0033667	1.75981	5.8756	51.7489	0.000134357	0.0152727
FBgn0035290	-1.52817	4.74228	51.7162	0.000134637	0.0152727
FBgn0004516	1.69827	2.86135	51.5694	0.000135904	0.0152727
FBgn0034462	-2.48766	2.78364	51.5363	0.000136191	0.0152727
FBgn0005659	1.27101	4.16014	51.1391	0.000139705	0.0152727
FBgn0259143	0.83971	5.6289	51.0648	0.000140375	0.0152727
FBgn0030102	-2.25091	6.7687	51.0409	0.000140592	0.0152727
FBgn0034417	0.896837	3.68721	51.0347	0.000140647	0.0152727
FBgn0040382	0.707032	5.29512	50.9408	0.000141502	0.0152727
FBgn0032402	-1.9018	4.69223	50.9239	0.000141657	0.0152727
FBgn0038247	-1.76603	1.94852	50.5755	0.000144891	0.0152727
FBgn0038079	-1.16527	5.53866	50.5559	0.000145074	0.0152727
FBgn0035777	1.99499	1.78545	50.4253	0.000146313	0.0152727
FBgn0037612	-1.87878	5.85547	50.252	0.000147977	0.0152727
FBgn0036428	1.24704	7.00266	50.1821	0.000148655	0.0152727
FBgn0039130	-1.73638	7.17152	50.1197	0.000149263	0.0152727
FBgn0034025	0.824073	6.25833	49.8989	0.000151442	0.0152727
FBgn0038348	2.53479	4.63345	49.8446	0.000151984	0.0152727
FBgn0032779	1.33144	4.64819	49.7275	0.000153162	0.0152727
FBgn0264748	-2.80205	1.94899	49.7099	0.000153339	0.0152727
FBgn0001229	-2.48858	6.27938	49.6953	0.000153487	0.0152727
FBgn0041710	-2.2999	6.39699	49.6044	0.000154411	0.0152727
FBgn0036713	0.770661	3.18936	49.5114	0.000155365	0.0152727
FBgn0033483	0.761793	5.89047	49.4971	0.000155511	0.0152727
FBgn0025680	1.14666	3.37343	49.3441	0.000157098	0.0152727
FBgn0033437	-0.853819	5.37918	49.0348	0.000160367	0.0152727
FBgn0032613	1.52537	1.39411	48.7763	0.000163167	0.0152727
FBgn0030183	-1.48416	6.6872	48.7454	0.000163506	0.0152727
FBgn0034761	-0.975323	3.07096	48.6723	0.00016431	0.0152727
FBgn0038151	1.39577	4.52957	48.6377	0.000164692	0.0152727
FBgn0038866	1.53433	4.64347	48.4919	0.000166318	0.0152727
FBgn0035781	1.17688	8.76832	48.4046	0.000167301	0.0152727
FBgn0033851	-4.13661	1.10504	48.3746	0.000167641	0.0152727
FBgn0035144	-1.66233	3.3967	48.1902	0.000169747	0.0152727
FBgn0035358	0.661133	4.11101	48.0806	0.000171015	0.0152727
FBgn0005278	1.27472	8.26186	47.8403	0.000173836	0.0152727
FBgn0266887	3.15126	2.56986	47.7643	0.000174741	0.0152727
FBgn0039787	0.870137	4.53343	47.7405	0.000175025	0.0152727
FBgn0004431	-3.19223	6.33094	47.655	0.000176052	0.0152727
FBgn0020445	-2.16515	6.95054	47.6299	0.000176356	0.0152727
FBgn0030051	-2.06463	6.82353	47.6139	0.000176548	0.0152727
FBgn0011829	0.75454	3.55276	47.4889	0.00017807	0.0152903
FBgn0030341	0.574014	5.4391	47.1454	0.000182335	0.0154504
FBgn0032350	-2.10552	7.52874	46.9898	0.00018431	0.0154504
FBgn0262141	-2.37807	1.65687	46.9098	0.000185336	0.0154504
FBgn0032685	2.13173	7.6321	46.798	0.000186782	0.0154504
FBgn0012051	0.609305	5.85039	46.7187	0.000187817	0.0154504
FBgn0031089	1.13495	5.12275	46.5336	0.000190259	0.0154504
FBgn0027572	0.79634	6.87147	46.3496	0.000192729	0.0154504
FBgn0050161	-1.68785	0.129829	46.3417	0.000192834	0.0154504
FBgn0033638	-1.78763	7.66812	46.3273	0.00019303	0.0154504
FBgn0046763	-0.908096	4.65323	46.31	0.000193264	0.0154504
FBgn0052161	-1.40601	0.864023	46.0576	0.000196729	0.0156198
FBgn0000442	1.5078	3.448	45.9174	0.000198689	0.015668
FBgn0267581	-1.75012	1.91707	45.769	0.000200789	0.0157267
FBgn0031939	-1.38741	6.69061	45.5856	0.000203423	0.01573
FBgn0036678	-2.56372	3.66959	45.5353	0.000204154	0.01573
FBgn0001254	-3.16427	7.55042	45.4256	0.000205758	0.01573
FBgn0053143	-2.69096	4.63639	45.261	0.000208195	0.01573
FBgn0046876	-2.91779	5.10477	45.2381	0.000208538	0.01573
FBgn0036782	0.925754	6.4104	45.1832	0.00020936	0.01573
FBgn0083956	1.99781	6.79687	45.0268	0.000211726	0.01573
FBgn0028900	-1.45914	1.24372	44.6313	0.000217865	0.01573
FBgn0038919	0.964252	4.02473	44.6142	0.000218135	0.01573
FBgn0020545	1.1122	5.49994	44.5496	0.000219161	0.01573
FBgn0037323	-2.1949	2.88238	44.4081	0.000221429	0.01573
FBgn0050154	1.02037	3.59567	44.395	0.00022164	0.01573
FBgn0051728	-1.03101	6.06289	44.3315	0.000222669	0.01573
FBgn0039732	-0.6821	3.61315	44.2294	0.000224336	0.01573
FBgn0259175	0.986246	6.67112	44.1454	0.00022572	0.01573
FBgn0260429	0.66292	4.9853	44.0713	0.000226948	0.01573
FBgn0015034	1.62153	1.18251	43.8906	0.000229983	0.01573
FBgn0029091	0.839551	3.85485	43.8881	0.000230025	0.01573
FBgn0036364	-1.81579	5.80021	43.8427	0.000230795	0.01573
FBgn0038641	0.94868	2.57494	43.7676	0.000232076	0.01573
FBgn0027375	0.649515	4.74537	43.4905	0.000236884	0.01573
FBgn0031970	-4.45784	3.38508	44.5085	0.00023789	0.01573
FBgn0085426	-1.95958	4.98839	43.3712	0.000238992	0.01573
FBgn0051475	1.49372	3.87424	43.3155	0.000239985	0.01573
FBgn0014417	0.612599	4.80378	43.2956	0.00024034	0.01573
FBgn0262112	-1.15537	4.75366	43.2758	0.000240696	0.01573
FBgn0263400	-2.00182	2.74647	43.2479	0.000241197	0.01573
FBgn0033668	1.38952	5.65818	43.2169	0.000241755	0.01573
FBgn0031182	0.962774	3.90098	43.2103	0.000241874	0.01573
FBgn0043362	-1.1825	7.42494	43.1726	0.000242556	0.01573
FBgn0266005	0.954116	3.28335	43.1538	0.000242897	0.01573
FBgn0004003	-1.32416	5.47441	42.9386	0.000246841	0.0158225
FBgn0050394	0.540114	4.73183	42.9271	0.000247055	0.0158225
FBgn0030999	1.13857	7.46001	42.8151	0.000249142	0.0158448
FBgn0066101	0.828286	5.03024	42.7621	0.000250138	0.0158448
FBgn0265146	3.25694	3.95918	43.5806	0.00025439	0.0160265
FBgn0041181	1.2519	6.56299	42.4103	0.000256876	0.0160402
FBgn0266579	0.590116	4.39971	42.2315	0.00026039	0.0160402
FBgn0050147	0.651557	4.87749	42.1609	0.000261794	0.0160402
FBgn0261625	1.16139	5.82073	42.0948	0.000263118	0.0160402
FBgn0031012	0.898224	4.39254	42.0611	0.000263796	0.0160402
FBgn0037448	-1.55614	4.5239	41.8589	0.000267911	0.0160402
FBgn0050021	0.804858	3.85197	41.7791	0.000269557	0.0160402
FBgn0039151	0.694641	6.66067	41.7774	0.000269593	0.0160402
FBgn0031220	-1.31908	6.91839	41.6931	0.000271346	0.0160402
FBgn0262794	-3.49345	1.81063	41.6397	0.000272463	0.0160402
FBgn0001142	-1.9687	9.64639	41.5055	0.000275299	0.0160402
FBgn0029863	-2.3046	3.42064	41.4956	0.000275511	0.0160402
FBgn0035737	-2.12386	0.62227	41.4729	0.000275995	0.0160402
FBgn0037720	0.718593	5.73012	41.4573	0.000276328	0.0160402
FBgn0039527	1.33074	4.80999	41.4498	0.000276489	0.0160402
FBgn0265048	-0.686002	6.20417	41.4377	0.000276746	0.0160402
FBgn0033968	1.3446	6.02503	41.2801	0.000280148	0.0160894
FBgn0031747	-2.31537	8.54915	41.158	0.000282819	0.0160894
FBgn0034705	-1.57522	3.57545	41.1081	0.00028392	0.0160894
FBgn0031894	-1.30045	2.96481	41.0753	0.000284647	0.0160894
FBgn0025574	-1.37032	7.50088	41.0394	0.000285447	0.0160894
FBgn0086711	1.03324	3.38215	40.9116	0.000288311	0.0160894
FBgn0028496	1.02461	3.3645	40.842	0.000289887	0.0160894
FBgn0039704	-1.75733	4.85837	40.7951	0.000290954	0.0160894
FBgn0051861	-1.30067	1.3195	40.7274	0.000292504	0.0160894
FBgn0030638	0.985859	3.26341	40.7077	0.000292956	0.0160894
FBgn0011576	1.38521	5.44646	40.6601	0.000294054	0.0160894
FBgn0025624	0.549453	4.49279	40.6517	0.000294251	0.0160894
FBgn0038350	2.08501	0.691253	40.5562	0.000296471	0.0161347
FBgn0031649	1.47291	4.2052	40.2435	0.000303894	0.0164381
FBgn0051410	-1.48044	5.44743	40.1974	0.00030501	0.0164381
FBgn0038412	1.02531	4.82003	40.1443	0.0003063	0.0164381
FBgn0005672	-0.841286	5.91106	40.0425	0.000308792	0.0164955
FBgn0033426	0.680116	4.11775	39.8761	0.000312922	0.0165828
FBgn0036144	-1.22646	5.44842	39.7769	0.000315419	0.0165828
FBgn0265726	-2.93929	8.69531	39.6659	0.00031824	0.0165828
FBgn0262984	-1.3848	0.37764	39.5626	0.000320896	0.0165828
FBgn0038252	-1.42785	1.70954	39.4627	0.000323491	0.0165828
FBgn0001112	-1.75644	6.82744	39.4568	0.000323646	0.0165828
FBgn0261436	0.912712	4.77876	39.4112	0.000324839	0.0165828
FBgn0031327	-0.556917	5.73895	39.3579	0.000326242	0.0165828
FBgn0052354	-1.5584	3.07038	39.3337	0.000326881	0.0165828
FBgn0031306	0.843648	3.65785	39.278	0.000328361	0.0165828
FBgn0016032	-1.49657	4.46358	39.156	0.000331628	0.0165828
FBgn0023179	0.514516	3.96631	39.1042	0.000333025	0.0165828
FBgn0035770	1.26589	7.94208	39.1018	0.000333091	0.0165828
FBgn0038790	1.42544	1.06711	38.9987	0.0003359	0.0165828
FBgn0037962	-1.35252	1.57905	38.9591	0.000336987	0.0165828
FBgn0033598	1.73128	3.3467	38.9589	0.000336993	0.0165828
FBgn0053169	1.06162	3.3184	38.9585	0.000337004	0.0165828
FBgn0086917	-0.625526	4.10392	38.9314	0.00033775	0.0165828
FBgn0033724	-1.80718	5.83498	38.8873	0.000338969	0.0165828
FBgn0032940	0.821214	6.74654	38.8848	0.000339038	0.0165828
FBgn0038012	-1.71693	0.319885	38.7027	0.000344134	0.0166629
FBgn0034688	-1.51043	5.97579	38.65	0.000345624	0.0166629
FBgn0020762	-1.21217	6.30785	38.6426	0.000345836	0.0166629
FBgn0263117	-1.36432	3.95094	38.6218	0.000346426	0.0166629
FBgn0260758	-1.01	3.39135	38.2711	0.000356602	0.0168115
FBgn0036801	0.672246	5.22665	38.1667	0.000359703	0.0168115
FBgn0000071	-2.32765	7.637	38.1659	0.000359728	0.0168115
FBgn0039788	-1.48173	4.36199	38.1033	0.000361603	0.0168115
FBgn0039269	-1.08006	5.32876	38.065	0.00036276	0.0168115
FBgn0052447	-1.68248	4.51817	38.0545	0.000363076	0.0168115
FBgn0012034	1.4022	7.18517	38.0355	0.00036365	0.0168115
FBgn0025684	0.861186	4.66605	37.9597	0.000365955	0.0168115
FBgn0266994	1.85399	1.81445	37.945	0.000366406	0.0168115
FBgn0262717	1.29777	5.78221	37.9422	0.000366492	0.0168115
FBgn0035244	0.899091	5.03297	37.9178	0.000367238	0.0168115
FBgn0036846	-2.05726	6.93595	37.8776	0.000368473	0.0168115
FBgn0019952	-1.81211	7.23071	37.8412	0.000369598	0.0168115
FBgn0052745	-2.6115	0.554695	37.834	0.000369819	0.0168115
FBgn0034053	1.50303	1.85002	37.6106	0.000376817	0.0168706
FBgn0032946	0.867409	5.44614	37.5284	0.000379432	0.0168706
FBgn0034366	-2.1957	6.15274	37.4632	0.000381527	0.0168706
FBgn0025456	-1.42514	8.98704	37.4131	0.000383143	0.0168706
FBgn0086687	1.44871	8.95373	37.3787	0.00038426	0.0168706
FBgn0028939	-2.15265	8.37962	37.2868	0.00038726	0.0168706
FBgn0040233	0.532245	6.35425	37.2564	0.000388257	0.0168706
FBgn0015569	1.8208	3.95457	37.232	0.000389061	0.0168706
FBgn0015576	2.17314	4.57344	37.2119	0.000389726	0.0168706
FBgn0263380	-2.16787	3.9956	37.203	0.00039002	0.0168706
FBgn0039851	-2.36068	3.73484	37.1638	0.000391323	0.0168706
FBgn0051453	-0.770589	4.71969	37.1438	0.000391988	0.0168706
FBgn0033744	1.10222	3.89393	36.9001	0.000400218	0.0168706
FBgn0040606	2.15538	1.39973	36.8574	0.00040168	0.0168706
FBgn0000043	-1.05454	8.94809	36.8398	0.000402285	0.0168706
FBgn0052207	-0.939264	3.13044	36.8256	0.000402776	0.0168706
FBgn0033785	-1.2986	4.38249	36.7886	0.000404053	0.0168706
FBgn0035833	0.57117	4.94876	36.7531	0.000405285	0.0168706
FBgn0035461	-0.81971	3.41569	36.747	0.000405498	0.0168706
FBgn0038366	1.18174	6.72982	36.7186	0.000406486	0.0168706
FBgn0035666	1.21516	9.51584	36.6418	0.000409178	0.0168706
FBgn0029924	-0.876004	6.31186	36.6283	0.000409654	0.0168706
FBgn0043578	-3.64425	4.76619	37.4332	0.000410499	0.0168706
FBgn0266252	2.72087	0.27507	36.6041	0.000410508	0.0168706
FBgn0038645	1.25104	4.84868	36.5872	0.000411106	0.0168706
FBgn0033928	1.22212	3.02274	36.5846	0.000411199	0.0168706
FBgn0036677	-2.53295	2.24067	36.5755	0.00041152	0.0168706
FBgn0266974	-1.24108	1.6127	36.5118	0.000413786	0.0168706
FBgn0032733	1.24488	5.4248	36.4597	0.000415651	0.0168706
FBgn0030805	-0.835586	3.53241	36.4436	0.00041623	0.0168706
FBgn0033875	-1.40661	5.94209	36.4434	0.000416236	0.0168706
FBgn0028667	-1.8181	0.887531	36.344	0.000419832	0.0169571
FBgn0004106	-0.597089	5.03549	36.2626	0.000422803	0.0169669
FBgn0033133	-1.21362	6.65385	36.2572	0.000423001	0.0169669
FBgn0038535	-1.25783	8.7718	36.1812	0.000425803	0.0170204
FBgn0031195	0.898062	3.54233	36.0058	0.000432359	0.0171839
FBgn0051352	0.744644	5.18535	35.9681	0.000433786	0.0171839
FBgn0052687	1.28828	7.78859	35.9534	0.000434342	0.0171839
FBgn0037538	-1.49845	6.37455	35.8455	0.000438465	0.0172401
FBgn0035767	-1.46835	5.91878	35.8254	0.000439237	0.0172401
FBgn0262951	2.49499	1.6902	35.7998	0.000440223	0.0172401
FBgn0046258	-1.56173	4.70663	35.6674	0.000445376	0.0173283
FBgn0050104	0.962397	4.40224	35.5937	0.000448273	0.0173283
FBgn0052702	0.870075	7.11732	35.59	0.000448419	0.0173283
FBgn0050098	-5.40229	0.239571	35.5466	0.00045014	0.0173283
FBgn0031417	1.13696	2.97751	35.5386	0.000450459	0.0173283
FBgn0262481	-0.727318	3.42577	35.4609	0.000453563	0.0173283
FBgn0030141	0.464112	5.094	35.4462	0.000454153	0.0173283
FBgn0034264	-0.802728	3.614	35.4104	0.000455592	0.0173283
FBgn0052695	0.662751	4.60826	35.3619	0.000457554	0.0173283
FBgn0029843	1.28709	3.92097	35.2809	0.000460855	0.0173283
FBgn0266432	-1.83224	0.921821	35.2699	0.000461303	0.0173283
FBgn0034985	0.797027	5.86377	35.2354	0.00046272	0.0173283
FBgn0003255	-1.60167	2.65345	35.2259	0.00046311	0.0173283
FBgn0025682	-1.32995	6.4898	35.2188	0.000463403	0.0173283
FBgn0052971	-1.3013	1.68023	35.1752	0.000465206	0.0173398
FBgn0036264	-3.56287	7.47519	35.8856	0.000467993	0.0173582
FBgn0027570	-1.9522	8.17188	35.0731	0.000469459	0.0173582
FBgn0028563	0.897475	5.0551	34.9756	0.000473567	0.0173582
FBgn0261566	-6.36479	1.12842	34.9005	0.000476762	0.0173582
FBgn0003162	-2.1316	8.72046	34.8675	0.000478177	0.0173582
FBgn0033919	0.659624	7.16023	34.8489	0.000478973	0.0173582
FBgn0028940	2.00299	7.07791	34.8472	0.000479049	0.0173582
FBgn0031646	-1.20505	1.29221	34.8452	0.000479131	0.0173582
FBgn0037933	-1.71756	6.7889	34.8252	0.000479995	0.0173582
FBgn0267727	-0.761796	7.02349	34.8094	0.000480674	0.0173582
FBgn0005778	-1.6818	1.09249	34.7138	0.000484824	0.0174102
FBgn0038629	2.04273	2.73992	34.7071	0.00048512	0.0174102
FBgn0036433	-1.04386	3.75399	34.5982	0.000489906	0.0174609
FBgn0052100	-1.42171	4.75441	34.5691	0.000491193	0.0174609
FBgn0261258	0.858291	5.52796	34.5288	0.00049299	0.0174609
FBgn0261113	0.995843	8.16487	34.5017	0.000494197	0.0174609
FBgn0004580	1.01569	3.71838	34.3706	0.000500103	0.0174609
FBgn0051133	0.735173	2.83839	34.2781	0.00050433	0.0174609
FBgn0034904	-2.02067	2.32128	34.2096	0.000507483	0.0174609
FBgn0052392	-1.62331	2.12662	34.1622	0.000509684	0.0174609
FBgn0034253	0.922759	6.8075	34.0686	0.000514061	0.0174609
FBgn0010350	0.596231	6.5556	34.024	0.000516163	0.0174609
FBgn0026376	0.552931	5.63893	33.9842	0.000518049	0.0174609
FBgn0033112	1.27781	3.20808	33.9786	0.000518315	0.0174609
FBgn0038349	0.944853	7.4423	33.963	0.000519057	0.0174609
FBgn0037487	1.06186	6.32729	33.9159	0.000521303	0.0174609
FBgn0267153	-2.77324	2.22591	33.8631	0.000523838	0.0174609
FBgn0264353	-1.70452	-0.237299	33.8092	0.000526442	0.0174609
FBgn0035964	-1.71988	8.71674	33.7732	0.000528194	0.0174609
FBgn0261509	0.81895	5.62908	33.771	0.0005283	0.0174609
FBgn0030587	-3.29173	-0.0889447	33.7539	0.00052913	0.0174609
FBgn0038761	1.07625	2.42488	33.7082	0.000531367	0.0174609
FBgn0037613	-0.678641	3.2472	33.7054	0.000531503	0.0174609
FBgn0035568	-1.50649	2.40274	33.7006	0.000531741	0.0174609
FBgn0031463	-1.08968	2.49711	33.6956	0.000531984	0.0174609
FBgn0039856	1.98611	4.18709	33.6278	0.000535331	0.0174609
FBgn0039486	1.74323	2.91636	33.6258	0.000535427	0.0174609
FBgn0001145	-1.03182	8.51135	33.5936	0.000537027	0.0174609
FBgn0039747	0.710604	3.51267	33.5738	0.00053801	0.0174609
FBgn0035187	1.86488	0.0517798	33.548	0.000539299	0.0174609
FBgn0037512	-1.89822	0.608884	33.5036	0.000541524	0.0174609
FBgn0028482	1.10644	2.44353	33.4638	0.000543527	0.0174609
FBgn0011569	-1.26389	2.32679	33.4547	0.000543986	0.0174609
FBgn0033639	-1.47533	7.33578	33.4529	0.000544076	0.0174609
FBgn0030041	0.944814	7.53267	33.4459	0.000544431	0.0174609
FBgn0051559	-2.64865	-0.186201	33.3724	0.000548165	0.0174609
FBgn0038966	-0.780622	4.95276	33.363	0.000548646	0.0174609
FBgn0031992	-0.921511	5.9844	33.3112	0.000551301	0.0174609
FBgn0261341	1.15408	7.95948	33.307	0.000551517	0.0174609
FBgn0032713	-1.63383	6.72188	33.3048	0.000551625	0.0174609
FBgn0041713	-3.97576	8.84316	33.9865	0.00055338	0.0174609
FBgn0000422	-3.13577	9.32265	33.1947	0.000557326	0.0174609
FBgn0052718	-1.28599	1.4404	33.187	0.00055773	0.0174609
FBgn0053329	0.967906	2.82717	33.1674	0.000558754	0.0174609
FBgn0034725	-1.1425	2.16605	33.1657	0.000558843	0.0174609
FBgn0054043	0.743024	3.20433	33.1642	0.000558918	0.0174609
FBgn0034595	-1.52068	1.90915	33.1235	0.000561055	0.0174609
FBgn0052259	-1.16272	3.11603	33.1199	0.00056124	0.0174609
FBgn0030989	-1.54063	0.493344	33.1099	0.00056177	0.0174609
FBgn0261675	1.09695	6.0295	33.1077	0.000561882	0.0174609
FBgn0038126	-2.10348	5.17594	32.9894	0.000568158	0.0174609
FBgn0035375	1.03207	5.88717	32.9769	0.000568826	0.0174609
FBgn0039209	0.690677	7.09164	32.9692	0.000569234	0.0174609
FBgn0051146	0.949079	3.56863	32.9685	0.000569272	0.0174609
FBgn0015283	-0.777167	7.78815	32.93	0.000571338	0.0174609
FBgn0032218	0.848374	5.43167	32.8965	0.000573145	0.0174609
FBgn0035844	0.822371	7.69478	32.8445	0.000575959	0.0174609
FBgn0263236	-3.47381	7.99	33.5095	0.00057693	0.0174609
FBgn0263617	-1.34525	6.4487	32.7947	0.000578672	0.0174609
FBgn0027790	-1.50537	5.04481	32.7898	0.000578942	0.0174609
FBgn0032590	-0.87379	4.61256	32.7706	0.000579993	0.0174609
FBgn0035995	-0.83876	6.42479	32.7168	0.000582952	0.0174609
FBgn0027578	-1.43482	7.68578	32.6909	0.00058438	0.0174609
FBgn0262722	-1.331	4.04568	32.6596	0.00058612	0.0174609
FBgn0045064	-1.8522	6.92354	32.6552	0.00058636	0.0174609
FBgn0264383	-1.4495	1.03143	32.603	0.000589273	0.0174609
FBgn0001941	0.894119	6.13637	32.5954	0.000589696	0.0174609
FBgn0039249	0.887415	5.18281	32.5917	0.000589906	0.0174609
FBgn0046225	-0.587289	3.38378	32.5807	0.000590522	0.0174609
FBgn0262360	-1.71503	0.270717	32.5621	0.000591568	0.0174609
FBgn0050192	-1.39241	0.997023	32.5153	0.000594202	0.0174609
FBgn0035091	-1.54065	7.01669	32.5151	0.000594215	0.0174609
FBgn0039022	1.564	4.12369	32.4833	0.000596016	0.0174609
FBgn0039632	-1.34982	6.12748	32.4767	0.000596389	0.0174609
FBgn0015765	0.61676	4.59069	32.4609	0.000597289	0.0174609
FBgn0038043	-0.562052	4.59182	32.4273	0.000599207	0.0174609
FBgn0043865	-1.21176	1.78107	32.4221	0.000599503	0.0174609
FBgn0028523	-0.979762	4.43972	32.3607	0.000603024	0.0174721
FBgn0033782	1.65587	2.90151	32.3257	0.000605042	0.0174721
FBgn0039748	1.23784	0.722832	32.3123	0.000605823	0.0174721
FBgn0030357	-2.2242	8.30612	32.2969	0.00060671	0.0174721
FBgn0010352	0.861758	8.32066	32.2847	0.000607422	0.0174721
FBgn0028941	-1.4885	0.84672	32.2517	0.000609344	0.0174839
FBgn0050277	0.644995	4.49792	32.1074	0.000617839	0.01768
FBgn0035204	-1.84835	5.96061	32.0841	0.000619227	0.01768
FBgn0001255	-2.39264	3.95892	32.0113	0.000623577	0.0176831
FBgn0038467	-1.21497	6.54478	31.9095	0.000629737	0.0176831
FBgn0034420	0.7828	7.34102	31.8709	0.000632089	0.0176831
FBgn0029870	0.6095	6.9518	31.8228	0.000635042	0.0176831
FBgn0036770	1.00532	6.12186	31.8175	0.000635369	0.0176831
FBgn0002592	-1.17743	2.98763	31.8143	0.000635561	0.0176831
FBgn0001311	0.867611	7.40494	31.7853	0.000637351	0.0176831
FBgn0004618	-1.21862	1.96033	31.7432	0.00063996	0.0176831
FBgn0037623	-2.02376	6.3898	31.7336	0.000640559	0.0176831
FBgn0035131	0.736014	5.2359	31.7082	0.000642137	0.0176831
FBgn0266734	3.53942	2.41163	31.7019	0.000642532	0.0176831
FBgn0085419	1.09794	1.16364	31.6823	0.000643756	0.0176831
FBgn0035727	-1.20323	2.38399	31.6774	0.000644063	0.0176831
FBgn0020372	1.51808	2.47143	31.672	0.0006444	0.0176831
FBgn0035608	-1.26031	4.39537	31.6655	0.000644808	0.0176831
FBgn0030796	0.489142	4.46482	31.6545	0.000645499	0.0176831
FBgn0030763	1.64577	4.55172	31.6346	0.000646748	0.0176831
FBgn0037624	-1.18377	7.13307	31.631	0.000646978	0.0176831
FBgn0033132	-1.22535	4.55091	31.6047	0.000648639	0.0176831
FBgn0026570	1.07937	3.18919	31.5856	0.000649843	0.0176831
FBgn0041337	1.74107	2.06263	31.5286	0.00065347	0.0177401
FBgn0035199	0.812603	4.03259	31.4573	0.000658033	0.0178222
FBgn0259716	-1.08101	7.51616	31.3463	0.000665226	0.0178791
FBgn0031530	1.15929	5.22327	31.3189	0.00066702	0.0178791
FBgn0025693	-0.609434	5.84564	31.2754	0.000669872	0.0178791
FBgn0037972	-0.941391	3.39517	31.1684	0.000676965	0.0178791
FBgn0035193	-1.51887	2.639	31.1309	0.000679467	0.0178791
FBgn0034999	-1.31677	7.80527	31.0784	0.000682999	0.0178791
FBgn0035385	1.29594	2.92157	31.0612	0.000684159	0.0178791
FBgn0015623	1.24962	7.24306	31.0601	0.000684237	0.0178791
FBgn0050293	-1.08502	3.06135	31.0403	0.000685575	0.0178791
FBgn0266637	2.65371	1.32977	31.0103	0.000687614	0.0178791
FBgn0030603	0.951042	5.78997	30.9566	0.000691277	0.0178791
FBgn0031636	0.695681	3.82036	30.9544	0.000691431	0.0178791
FBgn0243486	-1.43761	4.47416	30.9499	0.000691739	0.0178791
FBgn0035782	-1.85232	1.13648	30.9238	0.000693534	0.0178791
FBgn0035497	-0.555331	5.95416	30.8692	0.0006973	0.0178791
FBgn0038071	-1.99711	6.15846	30.8425	0.000699152	0.0178791
FBgn0265192	-1.31162	6.17994	30.8421	0.000699183	0.0178791
FBgn0035169	1.02262	5.9578	30.8295	0.00070006	0.0178791
FBgn0015359	-0.663825	3.84391	30.8267	0.000700251	0.0178791
FBgn0051337	-1.27646	2.6228	30.8254	0.000700342	0.0178791
FBgn0036128	1.85095	1.05766	30.8227	0.00070053	0.0178791
FBgn0062978	1.93982	3.81471	30.7764	0.000703767	0.0178791
FBgn0041607	1.02955	4.89841	30.7641	0.000704628	0.0178791
FBgn0032013	1.07777	1.86181	30.7254	0.000707355	0.0178791
FBgn0036436	-2.10594	5.0104	30.7171	0.000707937	0.0178791
FBgn0262028	0.777511	2.8117	30.7073	0.000708627	0.0178791
FBgn0032364	-1.37167	1.56716	30.6981	0.000709277	0.0178791
FBgn0013771	1.8431	4.85161	30.6671	0.000711478	0.0178791
FBgn0030798	1.30465	4.68212	30.6633	0.000711748	0.0178791
FBgn0033364	-1.37068	2.94073	30.6595	0.00071202	0.0178791
FBgn0037016	-0.852362	6.30973	30.6532	0.000712467	0.0178791
FBgn0035090	0.741402	7.45382	30.6251	0.000714471	0.0178791
FBgn0039970	0.802668	7.17437	30.6202	0.000714824	0.0178791
FBgn0264712	-2.19765	5.65088	30.6193	0.000714889	0.0178791
FBgn0036627	0.67967	3.01306	30.6017	0.000716142	0.0178791
FBgn0024294	-2.87187	6.18778	31.1891	0.000719034	0.0178791
FBgn0033524	2.42012	1.9045	30.5396	0.000720614	0.0178791
FBgn0052082	0.904806	5.41037	30.5212	0.000721941	0.0178791
FBgn0261563	-1.28157	5.57439	30.5037	0.000723211	0.0178791
FBgn0083978	-1.40696	3.44541	30.5012	0.000723391	0.0178791
FBgn0261550	0.581189	5.295	30.4972	0.000723686	0.0178791
FBgn0011236	0.656593	3.74418	30.4803	0.000724913	0.0178791
FBgn0086359	-0.841783	4.86517	30.4555	0.000726717	0.0178856
FBgn0031836	1.26492	5.61928	30.3545	0.000734141	0.0179986
FBgn0034403	-0.717326	3.22091	30.332	0.000735803	0.0179986
FBgn0038603	0.533145	5.75126	30.3159	0.000736997	0.0179986
FBgn0028407	-1.38965	1.09044	30.3085	0.000737549	0.0179986
FBgn0052758	-0.82691	6.22203	30.2851	0.000739294	0.0179986
FBgn0040367	-2.62094	2.47379	30.2673	0.000740625	0.0179986
FBgn0262579	0.679886	8.37058	30.225	0.000743792	0.0180377
FBgn0031335	-1.37656	1.45988	30.1349	0.000750605	0.0181238
FBgn0000473	1.60495	1.47246	30.1049	0.000752896	0.0181238
FBgn0264078	0.498101	5.45711	30.1009	0.000753203	0.0181238
FBgn0003046	-1.78304	8.75112	30.0794	0.000754845	0.0181238
FBgn0261686	-1.74252	1.16739	30.0601	0.000756324	0.0181238
FBgn0034783	1.55145	3.33344	30.0384	0.000757994	0.0181238
FBgn0039538	0.706414	3.31428	30.0346	0.000758285	0.0181238
FBgn0085235	-6.09987	3.53931	30.6038	0.000761402	0.0181609
FBgn0036516	-0.772858	6.51723	29.9274	0.000766602	0.0181633
FBgn0039908	0.556947	6.06418	29.868	0.00077126	0.0181633
FBgn0082585	1.28199	2.94488	29.8649	0.000771509	0.0181633
FBgn0034543	-1.31286	5.5837	29.8469	0.000772921	0.0181633
FBgn0004914	0.446217	5.87522	29.8464	0.000772961	0.0181633
FBgn0039413	-1.09751	1.64411	29.8086	0.000775957	0.0181633
FBgn0005612	-1.52948	7.27817	29.7998	0.000776657	0.0181633
FBgn0051363	-1.39283	6.91765	29.798	0.000776795	0.0181633
FBgn0033873	1.85247	3.60844	29.7943	0.000777088	0.0181633
FBgn0034706	-1.85498	5.87092	29.7584	0.00077995	0.0181633
FBgn0033593	2.30328	4.08095	29.9321	0.00077998	0.0181633
FBgn0040099	-0.698249	5.88901	29.7539	0.000780308	0.0181633
FBgn0034716	0.981061	4.29753	29.6865	0.000785719	0.0182284
FBgn0003204	-1.60806	7.68574	29.6565	0.000788143	0.0182284
FBgn0033246	1.55087	7.77029	29.6551	0.000788261	0.0182284
FBgn0014184	0.581369	10.2323	29.6253	0.000790677	0.0182284
FBgn0034937	-1.10334	2.10469	29.5973	0.000792952	0.0182284
FBgn0053178	2.28084	3.07846	29.5752	0.000794754	0.0182284
FBgn0037020	0.717463	4.65323	29.575	0.000794775	0.0182284
FBgn0031384	-1.60009	4.84799	29.5639	0.000795682	0.0182284
FBgn0036422	1.35251	8.95277	29.5405	0.000797601	0.0182363
FBgn0030510	1.37738	2.41617	29.4677	0.000803609	0.018254
FBgn0032264	0.953744	5.14425	29.461	0.000804172	0.018254
FBgn0036449	0.939015	5.96435	29.4561	0.000804574	0.018254
FBgn0032105	-0.719472	3.73933	29.4549	0.000804677	0.018254
FBgn0014396	1.74881	2.64471	29.3625	0.000812396	0.0183486
FBgn0030304	0.984096	2.54242	29.3582	0.000812763	0.0183486
FBgn0031558	-0.750039	7.68758	29.3483	0.000813596	0.0183486
FBgn0025558	-0.759385	3.29925	29.273	0.000819971	0.0183598
FBgn0043001	-0.560597	3.52132	29.2664	0.00082053	0.0183598
FBgn0260945	-1.02423	6.45809	29.2646	0.000820687	0.0183598
FBgn0032668	1.35639	2.33412	29.2582	0.000821229	0.0183598
FBgn0030595	-3.23667	2.95979	29.2491	0.00082201	0.0183598
FBgn0262872	0.597092	7.58673	29.1515	0.000830393	0.0184667
FBgn0250839	-3.04482	5.04252	29.7137	0.00083215	0.0184667
FBgn0026439	1.16876	5.25668	29.1275	0.000832473	0.0184667
FBgn0261278	-0.552318	6.41348	29.1157	0.000833494	0.0184667
FBgn0264894	1.06048	6.88012	29.0532	0.000838951	0.0184667
FBgn0263413	1.60431	5.33597	29.0526	0.000838998	0.0184667
FBgn0035266	0.758986	5.4521	29.0426	0.000839879	0.0184667
FBgn0030156	1.37731	2.27493	29.0067	0.000843036	0.0184667
FBgn0028691	-0.724886	7.81188	28.9912	0.000844401	0.0184667
FBgn0262854	-3.5367	3.31791	29.5511	0.000845966	0.0184667
FBgn0042696	1.39219	4.53489	28.9665	0.000846586	0.0184667
FBgn0031432	1.49115	6.1811	28.9554	0.000847568	0.0184667
FBgn0035083	1.27709	6.53267	28.9526	0.000847822	0.0184667
FBgn0000057	-0.767658	4.97203	28.9382	0.000849097	0.0184667
FBgn0261992	-1.2544	0.891472	28.8486	0.000857116	0.0185527
FBgn0085410	-1.89634	1.7023	28.8486	0.000857118	0.0185527
FBgn0028518	0.639697	5.97405	28.832	0.000858612	0.0185527
FBgn0030073	0.646226	6.37597	28.8137	0.000860272	0.0185527
FBgn0035208	-2.14764	0.364191	28.7993	0.000861576	0.0185527
FBgn0050339	1.68499	3.86388	28.7808	0.000863253	0.0185527
FBgn0038839	0.996691	3.27037	28.7697	0.000864257	0.0185527
FBgn0030629	-0.774931	2.57714	28.7318	0.000867716	0.0185695
FBgn0000640	-0.777078	12.7863	28.7119	0.00086954	0.0185695
FBgn0033725	-1.89076	11.2799	28.7086	0.000869843	0.0185695
FBgn0003863	1.35031	9.40484	28.6806	0.000872413	0.018575
FBgn0034382	3.50906	1.90176	28.6112	0.000878832	0.018575
FBgn0034356	-1.19909	7.2576	28.6087	0.000879066	0.018575
FBgn0032467	-1.40674	8.43293	28.6007	0.00087981	0.018575
FBgn0029835	-0.972434	4.82635	28.5959	0.000880257	0.018575
FBgn0035160	-1.13098	1.83908	28.5886	0.000880942	0.018575
FBgn0262366	-0.469224	4.39363	28.5837	0.000881397	0.018575
FBgn0031466	2.4163	3.21102	28.5673	0.000882924	0.018575
FBgn0029702	-1.34779	1.96101	28.5096	0.000888343	0.018628
FBgn0035034	-1.32493	1.10171	28.5012	0.000889137	0.018628
FBgn0265255	-1.94813	0.0242476	28.4424	0.000894706	0.018628
FBgn0267792	-1.16179	6.47953	28.4321	0.000895683	0.018628
FBgn0265767	0.917213	3.28693	28.4264	0.000896219	0.018628
FBgn0267580	3.09453	-0.265677	28.3598	0.000902599	0.018628
FBgn0000241	-2.65697	5.34215	28.9048	0.000903872	0.018628
FBgn0020399	-1.43431	1.1638	28.3272	0.000905739	0.018628
FBgn0034396	-1.4401	3.97169	28.3165	0.000906774	0.018628
FBgn0051015	1.72904	3.33239	28.3114	0.000907264	0.018628
FBgn0001250	0.885051	7.23967	28.3063	0.000907757	0.018628
FBgn0031248	-0.666184	9.93902	28.3038	0.000908	0.018628
FBgn0030056	0.783834	5.8368	28.2935	0.000908998	0.018628
FBgn0037765	1.42447	2.11549	28.2499	0.000913242	0.018628
FBgn0085462	-1.48651	0.286774	28.242	0.000914018	0.018628
FBgn0033504	1.20469	7.12153	28.2362	0.000914577	0.018628
FBgn0031388	-1.29967	2.31102	28.2142	0.000916735	0.018628
FBgn0027493	1.22503	6.76952	28.1915	0.000918965	0.018628
FBgn0034715	1.60034	5.0164	28.18	0.000920094	0.018628
FBgn0039203	-3.38188	1.9148	28.1682	0.000921261	0.018628
FBgn0054056	1.10422	4.53508	28.1588	0.000922186	0.018628
FBgn0032048	1.10756	2.46894	28.1355	0.000924495	0.018628
FBgn0029092	-1.05574	8.51947	28.1292	0.00092512	0.018628
FBgn0016034	-0.830035	2.34243	28.1151	0.000926518	0.018628
FBgn0050463	0.49132	7.07513	28.1121	0.000926812	0.018628
FBgn0034501	0.668094	6.88051	28.0933	0.000928683	0.018628
FBgn0035047	-0.754275	4.97622	28.0807	0.000929943	0.018628
FBgn0051663	0.559254	4.16475	28.059	0.000932114	0.018628
FBgn0030764	-0.917895	2.69493	28.0478	0.000933241	0.018628
FBgn0039890	0.571602	7.94323	28.0437	0.000933648	0.018628
FBgn0031285	0.581276	7.3275	28.0068	0.000937366	0.0186448
FBgn0003117	-1.4599	3.69766	28.0034	0.000937708	0.0186448
FBgn0037536	0.501234	5.88557	27.9735	0.000940733	0.0186452
FBgn0017558	1.11533	6.88713	27.9616	0.000941937	0.0186452
FBgn0026263	-0.897831	4.90134	27.9403	0.000944097	0.0186452
FBgn0034443	-1.33522	8.96109	27.935	0.000944635	0.0186452
FBgn0011566	0.643093	3.47135	27.9198	0.000946192	0.0186452
FBgn0051028	0.6609	4.55302	27.9081	0.000947381	0.0186452
FBgn0054045	1.43642	-0.179119	27.8342	0.000954983	0.018763
FBgn0053465	-1.03671	4.23254	27.8182	0.000956629	0.0187635
FBgn0264953	0.74347	7.26245	27.6844	0.00097061	0.018966
FBgn0053230	0.640543	3.29982	27.6806	0.000971008	0.018966
FBgn0015575	1.22913	6.74962	27.6477	0.000974493	0.018966
FBgn0038476	-0.713839	6.26321	27.6295	0.00097642	0.018966
FBgn0037646	1.63091	2.79755	27.6131	0.000978164	0.018966
FBgn0051803	-1.33669	1.72507	27.6078	0.000978727	0.018966
FBgn0053056	1.08481	4.37482	27.6071	0.000978806	0.018966
FBgn0261552	1.36983	7.74137	27.586	0.000981055	0.018966
FBgn0034566	-1.21936	3.01876	27.5466	0.000985274	0.018966
FBgn0262989	-1.86494	-0.205949	27.5181	0.000988346	0.018966
FBgn0030234	1.30095	5.09046	27.5111	0.000989107	0.018966
FBgn0003447	-1.51052	7.31006	27.5051	0.000989748	0.018966
FBgn0053970	-1.77905	5.66582	27.4906	0.000991319	0.018966
FBgn0034636	-0.981817	4.1173	27.4815	0.000992308	0.018966
FBgn0029970	-0.754843	2.9994	27.4743	0.000993089	0.018966
FBgn0027610	1.18293	4.77634	27.4739	0.000993128	0.018966
FBgn0036568	-1.39965	3.17272	27.4436	0.000996427	0.0189977
FBgn0083960	-1.14174	1.79059	27.3808	0.0010033	0.0190621
FBgn0051100	-1.1382	6.9385	27.3762	0.00100381	0.0190621
FBgn0034997	-1.41378	7.56564	27.3518	0.0010065	0.0190621
FBgn0005671	0.874825	8.85769	27.351	0.00100659	0.0190621
FBgn0038934	-0.917967	5.25694	27.3232	0.00100967	0.0190621
FBgn0036685	-0.936681	6.71485	27.3159	0.00101048	0.0190621
FBgn0026320	-1.01809	4.73622	27.2634	0.00101632	0.0190621
FBgn0034429	2.15416	1.48191	27.2625	0.00101643	0.0190621
FBgn0015040	1.11413	6.31952	27.2464	0.00101822	0.0190621
FBgn0263864	-1.52648	6.81444	27.2447	0.00101842	0.0190621
FBgn0040060	1.59687	9.57696	27.2337	0.00101964	0.0190621
FBgn0039543	0.747981	5.97708	27.2133	0.00102194	0.0190621
FBgn0266962	-1.62725	0.0839902	27.176	0.00102615	0.0190621
FBgn0037677	-2.46059	7.46282	27.1668	0.00102719	0.0190621
FBgn0015541	0.620703	6.29984	27.1577	0.00102822	0.0190621
FBgn0050495	1.7018	2.66242	27.1557	0.00102845	0.0190621
FBgn0052645	1.48216	1.5992	27.1414	0.00103008	0.0190621
FBgn0035983	-1.38833	6.5649	27.1405	0.00103017	0.0190621
FBgn0031401	0.74305	5.59448	27.1328	0.00103105	0.0190621
FBgn0036837	1.01482	8.51867	27.1094	0.00103372	0.0190811
FBgn0053346	-1.81924	6.13195	27.0832	0.00103672	0.0190921
FBgn0039045	0.811066	4.09964	27.0519	0.00104032	0.0190921
FBgn0025373	0.61501	5.58483	27.0194	0.00104407	0.0190921
FBgn0038070	-1.41683	2.33668	26.9956	0.00104682	0.0190921
FBgn0032845	0.522053	3.95028	26.9808	0.00104855	0.0190921
FBgn0036761	-1.05396	5.31123	26.9652	0.00105037	0.0190921
FBgn0039844	-1.5937	7.74903	26.9613	0.00105081	0.0190921
FBgn0051752	-1.21423	1.56266	26.9435	0.0010529	0.0190921
FBgn0261239	-1.13199	6.77843	26.9369	0.00105366	0.0190921
FBgn0040336	1.46358	4.29054	26.9269	0.00105484	0.0190921
FBgn0262535	-1.77909	0.564813	26.9136	0.0010564	0.0190921
FBgn0027607	0.467767	5.91933	26.9018	0.00105779	0.0190921
FBgn0035147	1.17377	6.95144	26.8592	0.00106281	0.0190921
FBgn0035798	1.77035	5.58356	26.8445	0.00106455	0.0190921
FBgn0032111	-1.60161	1.11643	26.8428	0.00106476	0.0190921
FBgn0085354	0.7713	5.00159	26.829	0.0010664	0.0190921
FBgn0263456	1.20906	2.98378	26.8202	0.00106744	0.0190921
FBgn0045038	1.22558	2.78413	26.8062	0.0010691	0.0190921
FBgn0038110	-1.07242	6.64848	26.7921	0.00107079	0.0190921
FBgn0026718	-1.03228	5.64369	26.7822	0.00107197	0.0190921
FBgn0261548	-1.69343	7.14135	26.7796	0.00107229	0.0190921
FBgn0032798	0.718647	3.69029	26.7723	0.00107315	0.0190921
FBgn0029821	-0.987468	3.80424	26.7669	0.0010738	0.0190921
FBgn0020880	-0.916834	1.92595	26.7662	0.00107388	0.0190921
FBgn0030278	-1.4395	2.45266	26.7528	0.00107549	0.0190921
FBgn0035542	0.730175	7.60013	26.7257	0.00107876	0.0191207
FBgn0013717	-1.0237	5.08958	26.6801	0.00108427	0.0191891
FBgn0032935	-0.838444	6.29044	26.6537	0.00108749	0.0192076
FBgn0039642	-1.30983	4.47885	26.606	0.00109331	0.0192076
FBgn0015570	2.75477	6.26758	27.111	0.00109337	0.0192076
FBgn0267339	0.956651	3.66263	26.5935	0.00109485	0.0192076
FBgn0026619	-1.23528	4.95733	26.5775	0.00109681	0.0192076
FBgn0025621	0.483442	5.56711	26.577	0.00109687	0.0192076
FBgn0034199	-2.12806	4.15474	26.5767	0.00109691	0.0192076
FBgn0266735	-3.82131	0.540638	26.5486	0.00110038	0.0192392
FBgn0035665	1.50416	10.4395	26.5235	0.0011035	0.0192646
FBgn0054007	-3.00949	0.538546	26.4975	0.00110673	0.0192754
FBgn0031914	1.54085	5.48091	26.4834	0.00110849	0.0192754
FBgn0038646	0.845673	4.20089	26.4785	0.0011091	0.0192754
FBgn0013308	1.77511	3.96059	26.4393	0.001114	0.0193006
FBgn0033943	1.36246	-0.161699	26.4374	0.00111425	0.0193006
FBgn0002573	1.2331	2.38149	26.4271	0.00111555	0.0193006
FBgn0260386	0.922828	3.15669	26.4084	0.0011179	0.0193125
FBgn0027600	1.31075	4.19115	26.3819	0.00112124	0.0193414
FBgn0036556	0.490405	5.85096	26.3306	0.00112776	0.0193984
FBgn0030384	-1.67976	0.240971	26.3296	0.00112789	0.0193984
FBgn0035603	-0.485095	4.41374	26.3022	0.0011314	0.0194299
FBgn0036485	0.854587	3.26301	26.2865	0.00113341	0.0194357
FBgn0036262	1.928	7.74508	26.2649	0.00113618	0.0194544
FBgn0039257	-2.1359	8.30983	26.2314	0.00114052	0.0194755
FBgn0011705	-0.5881	4.09264	26.2164	0.00114246	0.0194755
FBgn0002735	-0.989771	2.02525	26.2107	0.00114319	0.0194755
FBgn0037288	2.60537	1.19682	26.2022	0.00114431	0.0194755
FBgn0003499	0.842012	3.02524	26.1906	0.00114581	0.0194755
FBgn0039821	1.21716	2.44129	26.16	0.00114981	0.0195148
FBgn0264488	0.79421	8.24394	26.0739	0.00116113	0.0196445
FBgn0031673	-0.671731	4.79359	26.0728	0.00116127	0.0196445
FBgn0039805	1.86676	2.02588	26.0633	0.00116254	0.0196445
FBgn0027547	0.762184	6.22054	26.0286	0.00116714	0.0196937
FBgn0037238	0.926336	1.93759	26.0002	0.00117094	0.019729
FBgn0004858	0.641384	4.43659	25.9643	0.00117576	0.0197552
FBgn0014427	-1.92675	6.70232	25.9632	0.0011759	0.0197552
FBgn0051221	0.682232	4.19759	25.9505	0.00117762	0.0197553
FBgn0038795	1.20999	4.37779	25.9034	0.00118399	0.0197992
FBgn0259168	-1.44031	7.44128	25.8983	0.00118469	0.0197992
FBgn0038575	-1.27383	2.0786	25.8934	0.00118535	0.0197992
FBgn0265263	-1.49606	3.25515	25.8229	0.00119498	0.0198975
FBgn0028480	0.611982	5.27645	25.8188	0.00119554	0.0198975
FBgn0003390	-0.783993	4.09387	25.8089	0.0011969	0.0198975
FBgn0036595	1.67975	2.36908	25.7731	0.00120184	0.0198975
FBgn0030876	-1.46489	8.40219	25.7564	0.00120416	0.0198975
FBgn0038420	1.05159	5.03771	25.7553	0.00120432	0.0198975
FBgn0261276	0.415603	6.35296	25.7412	0.00120627	0.0198975
FBgn0263598	0.836046	9.16714	25.7342	0.00120724	0.0198975
FBgn0027560	1.06835	6.87329	25.7272	0.00120821	0.0198975
FBgn0016660	-1.21633	2.47617	25.7258	0.00120841	0.0198975
FBgn0051004	0.850999	7.05486	25.7118	0.00121037	0.0199015
FBgn0001227	-1.56398	5.93867	25.6755	0.00121544	0.0199567
FBgn0262870	0.683622	6.2845	25.6432	0.00121999	0.020003
FBgn0037845	1.51597	0.226354	25.6244	0.00122264	0.0200181
FBgn0030955	-0.925401	8.31942	25.5823	0.0012286	0.0200548
FBgn0031950	0.663879	6.21805	25.5758	0.00122953	0.0200548
FBgn0030542	-3.03713	2.45139	25.572	0.00123008	0.0200548
FBgn0266758	1.02812	6.71404	25.5599	0.0012318	0.0200548
FBgn0052843	1.04154	3.12537	25.5027	0.00124001	0.0200679
FBgn0250822	-2.02105	1.08284	25.5003	0.00124035	0.0200679
FBgn0036834	1.76573	1.53114	25.4812	0.0012431	0.0200679
FBgn0032313	-1.34433	1.74997	25.4784	0.0012435	0.0200679
FBgn0000180	-1.24732	4.29923	25.4677	0.00124506	0.0200679
FBgn0264672	0.459841	4.7105	25.4498	0.00124765	0.0200679
FBgn0027779	0.675187	7.84334	25.437	0.0012495	0.0200679
FBgn0030336	0.585728	5.54484	25.4173	0.00125237	0.0200679
FBgn0264907	0.614651	4.88244	25.4126	0.00125306	0.0200679
FBgn0262624	0.797203	4.12852	25.405	0.00125417	0.0200679
FBgn0264478	-1.82259	1.0666	25.3862	0.00125692	0.0200679
FBgn0025387	-1.2364	0.9913	25.386	0.00125695	0.0200679
FBgn0266072	-3.03368	0.569039	25.3819	0.00125755	0.0200679
FBgn0263120	0.826994	7.36744	25.3779	0.00125813	0.0200679
FBgn0052656	1.57903	7.42787	25.3732	0.00125882	0.0200679
FBgn0037515	-1.50045	6.261	25.3585	0.00126098	0.0200679
FBgn0030484	1.48466	6.6569	25.3274	0.00126556	0.0200679
FBgn0024989	0.606261	6.79491	25.3164	0.00126718	0.0200679
FBgn0037464	-1.59021	2.06012	25.3123	0.0012678	0.0200679
FBgn0024958	-1.06833	7.07098	25.3042	0.00126899	0.0200679
FBgn0003888	-1.87349	6.91004	25.2823	0.00127225	0.0200679
FBgn0259216	0.8119	6.45362	25.2818	0.00127233	0.0200679
FBgn0011743	-1.22328	3.23865	25.2811	0.00127242	0.0200679
FBgn0262737	-1.04881	7.9991	25.2151	0.00128229	0.0201961
FBgn0034920	1.32641	4.96849	25.1987	0.00128476	0.0202006
FBgn0037021	-0.705295	5.26515	25.1845	0.0012869	0.0202006
FBgn0037151	1.33108	3.2945	25.1713	0.0012889	0.0202006
FBgn0030098	1.08348	8.37083	25.1486	0.00129234	0.0202006
FBgn0031450	-1.2217	6.45027	25.1474	0.00129251	0.0202006
FBgn0052110	-0.836245	2.31643	25.1381	0.00129393	0.0202006
FBgn0039315	1.33601	3.5691	25.1325	0.00129478	0.0202006
FBgn0040291	-1.85975	0.273442	25.1158	0.00129731	0.020213
FBgn0052068	0.656538	5.92816	25.1023	0.00129937	0.0202179
FBgn0035823	-1.31962	3.21018	25.0891	0.0013014	0.0202223
FBgn0025390	1.34117	1.41655	25.0585	0.00130609	0.020268
FBgn0011666	-0.678773	6.57735	25.0193	0.00131213	0.0203097
FBgn0035710	1.84556	6.59371	25.0104	0.00131351	0.0203097
FBgn0034489	2.12241	1.50193	25.007	0.00131403	0.0203097
FBgn0034540	0.554288	4.09984	24.9793	0.00131834	0.0203491
FBgn0037890	1.25166	5.13206	24.9627	0.00132092	0.0203619
FBgn0013343	0.705352	5.80095	24.9448	0.00132373	0.0203694
FBgn0267412	-1.64425	1.31151	24.926	0.00132666	0.0203694
FBgn0037007	-1.10561	9.59087	24.9259	0.00132668	0.0203694
FBgn0017581	0.756583	9.29166	24.8958	0.00133142	0.0204129
FBgn0031560	-0.945935	6.30322	24.864	0.00133644	0.0204129
FBgn0261803	-1.45302	4.38324	24.8515	0.00133841	0.0204129
FBgn0033753	1.56198	1.94968	24.8483	0.00133893	0.0204129
FBgn0038852	1.80754	0.192721	24.8355	0.00134096	0.0204129
FBgn0032314	-1.20286	3.19741	24.8091	0.00134516	0.0204129
FBgn0033677	0.726857	4.14288	24.8059	0.00134568	0.0204129
FBgn0265935	0.648338	7.67104	24.8036	0.00134604	0.0204129
FBgn0028668	-2.06432	0.183158	24.7704	0.00135137	0.0204129
FBgn0004055	0.450815	5.39331	24.7571	0.0013535	0.0204129
FBgn0033777	0.594037	6.26024	24.7457	0.00135534	0.0204129
FBgn0032447	-0.862541	2.41737	24.7395	0.00135634	0.0204129
FBgn0036226	1.47144	5.64657	24.7186	0.00135972	0.0204129
FBgn0262102	-1.61158	1.55486	24.7178	0.00135984	0.0204129
FBgn0031975	1.7419	4.0539	24.7158	0.00136017	0.0204129
FBgn0053126	-2.42191	5.89019	25.1653	0.00136026	0.0204129
FBgn0001253	-2.42112	5.90856	25.1639	0.00136048	0.0204129
FBgn0262728	0.482652	3.91514	24.6906	0.00136425	0.0204129
FBgn0051139	-1.69354	0.541768	24.686	0.001365	0.0204129
FBgn0034470	0.884528	8.75531	24.6729	0.00136713	0.0204129
FBgn0032752	0.869956	2.48772	24.6475	0.00137128	0.0204129
FBgn0265977	-4.11992	0.803465	24.645	0.00137169	0.0204129
FBgn0263049	-3.51526	4.39874	25.0884	0.00137244	0.0204129
FBgn0015035	3.33706	3.54464	25.0623	0.00137661	0.0204129
FBgn0052333	-1.39372	4.98031	24.6051	0.00137824	0.0204129
FBgn0030247	-1.39441	3.14269	24.598	0.0013794	0.0204129
FBgn0000303	0.887563	1.61484	24.5962	0.00137971	0.0204129
FBgn0039331	-1.24739	2.20555	24.5914	0.00138049	0.0204129
FBgn0262812	-1.73902	0.235657	24.5885	0.00138098	0.0204129
FBgn0015240	0.461873	4.6069	24.5676	0.00138444	0.0204129
FBgn0051391	-1.32924	2.37338	24.5595	0.00138576	0.0204129
FBgn0039483	2.98388	0.712966	24.5589	0.00138587	0.0204129
FBgn0031268	-0.563774	5.17385	24.5303	0.00139063	0.020457
FBgn0042627	2.20724	5.32472	24.9105	0.00140114	0.0204593
FBgn0029856	-1.48493	3.38022	24.4114	0.0014106	0.0204593
FBgn0032130	0.736516	4.057	24.4023	0.00141214	0.0204593
FBgn0020503	0.776049	7.66196	24.3954	0.00141332	0.0204593
FBgn0036288	0.524899	4.2083	24.3949	0.0014134	0.0204593
FBgn0250819	0.707263	6.75616	24.3798	0.00141597	0.0204593
FBgn0035755	0.470573	4.67295	24.3688	0.00141785	0.0204593
FBgn0033174	-1.01262	3.50401	24.3654	0.00141842	0.0204593
FBgn0028665	0.685306	7.93295	24.3603	0.0014193	0.0204593
FBgn0266101	-0.930982	5.59549	24.3553	0.00142016	0.0204593
FBgn0030747	1.51559	6.08274	24.3535	0.00142046	0.0204593
FBgn0035544	2.32041	0.491379	24.3351	0.00142361	0.0204593
FBgn0024179	0.443221	5.35951	24.3289	0.00142469	0.0204593
FBgn0003996	-0.931362	5.51414	24.3266	0.00142507	0.0204593
FBgn0040333	-1.69148	1.57206	24.3079	0.00142829	0.0204593
FBgn0014906	0.695133	5.8284	24.3002	0.00142962	0.0204593
FBgn0011554	1.19931	4.60624	24.2902	0.00143134	0.0204593
FBgn0039737	1.20959	7.63856	24.2601	0.00143655	0.0204593
FBgn0038959	-2.66806	2.53094	24.2544	0.00143754	0.0204593
FBgn0261534	1.98055	6.12247	24.2368	0.0014406	0.0204593
FBgn0014163	-1.29612	8.91239	24.2346	0.00144099	0.0204593
FBgn0029002	-1.20757	6.03034	24.2135	0.00144467	0.0204593
FBgn0032772	1.71518	2.14503	24.2105	0.0014452	0.0204593
FBgn0024947	1.03201	6.57801	24.209	0.00144545	0.0204593
FBgn0010258	-1.17639	3.0945	24.2031	0.00144649	0.0204593
FBgn0265089	-1.24066	3.83399	24.2018	0.00144671	0.0204593
FBgn0036205	0.471767	4.94701	24.1947	0.00144796	0.0204593
FBgn0035612	0.853228	8.55351	24.1947	0.00144796	0.0204593
FBgn0061196	-1.44498	1.26994	24.1926	0.00144833	0.0204593
FBgn0029700	-1.12853	0.85839	24.1878	0.00144917	0.0204593
FBgn0053136	-1.24377	1.60444	24.1856	0.00144955	0.0204593
FBgn0011202	0.641967	6.64434	24.181	0.00145037	0.0204593
FBgn0039849	0.770455	5.55126	24.1689	0.00145249	0.0204593
FBgn0032869	-1.06427	3.1652	24.158	0.00145441	0.0204593
FBgn0259111	1.11731	6.61957	24.1535	0.0014552	0.0204593
FBgn0036780	2.09246	0.325178	24.1471	0.00145634	0.0204593
FBgn0029866	-0.805686	4.40051	24.1438	0.00145692	0.0204593
FBgn0259938	0.745576	5.98291	24.1263	0.00146002	0.0204593
FBgn0033312	-2.70557	0.100248	24.1212	0.00146091	0.0204593
FBgn0031174	0.442248	6.16059	24.1186	0.00146138	0.0204593
FBgn0030429	-0.741537	3.43586	24.0994	0.00146479	0.0204823
FBgn0052499	1.13115	5.23144	24.0706	0.00146993	0.0205057
FBgn0262581	-1.40901	1.96875	24.0702	0.00147	0.0205057
FBgn0030685	0.431596	6.46436	24.0293	0.00147733	0.0205753
FBgn0037217	-2.3733	2.73608	24.0226	0.00147854	0.0205753
FBgn0085359	1.54043	7.03084	23.9867	0.00148502	0.0206407
FBgn0266410	-0.809377	9.2497	23.8986	0.00150108	0.0208299
FBgn0029504	0.651049	5.59476	23.8923	0.00150223	0.0208299
FBgn0036410	-1.10607	7.8953	23.8651	0.00150723	0.0208744
FBgn0034816	-1.23119	3.26042	23.8324	0.00151328	0.0208994
FBgn0050417	-1.4422	0.421048	23.8288	0.00151395	0.0208994
FBgn0032132	-1.76662	3.31654	23.8056	0.00151827	0.0208994
FBgn0030493	-3.49971	4.23689	24.2247	0.0015192	0.0208994
FBgn0085293	-1.81122	0.721274	23.799	0.00151949	0.0208994
FBgn0033274	-0.948723	1.87567	23.7891	0.00152133	0.0208994
FBgn0034292	1.22496	5.68718	23.7874	0.00152166	0.0208994
FBgn0024314	-0.448358	6.41725	23.7675	0.00152537	0.0209104
FBgn0053196	0.992778	10.8786	23.7561	0.00152752	0.0209104
FBgn0086916	-1.29902	1.69317	23.7542	0.00152787	0.0209104
FBgn0032884	-0.573804	7.22499	23.7429	0.00153	0.0209148
FBgn0029823	-1.33736	8.68796	23.727	0.00153299	0.020931
FBgn0040299	0.755972	5.43589	23.717	0.00153487	0.020932
FBgn0035692	-1.21335	6.96294	23.7055	0.00153704	0.0209365
FBgn0263241	0.952392	4.00413	23.6962	0.00153881	0.0209365
FBgn0035264	-0.48979	3.52737	23.6742	0.00154299	0.0209687
FBgn0032449	-1.09155	2.67499	23.6598	0.00154572	0.0209769
FBgn0035638	-1.47744	1.46349	23.6488	0.00154781	0.0209769
FBgn0034839	-1.30741	1.44522	23.6425	0.00154902	0.0209769
FBgn0038056	0.505414	3.50813	23.6292	0.00155157	0.0209869
FBgn0267041	-1.39047	0.908592	23.5979	0.00155756	0.0210434
FBgn0261834	-1.37574	-0.0420033	23.5564	0.00156557	0.0210773
FBgn0031936	1.6179	0.831642	23.5394	0.00156888	0.0210773
FBgn0035790	2.22852	1.43538	23.5369	0.00156935	0.0210773
FBgn0035949	-2.20511	2.89544	23.534	0.00156992	0.0210773
FBgn0001186	1.00819	6.21436	23.5305	0.00157059	0.0210773
FBgn0053198	-0.554582	4.19461	23.5285	0.00157098	0.0210773
FBgn0001977	-1.11425	6.44561	23.5066	0.00157525	0.021081
FBgn0031907	-3.88438	9.36377	23.9085	0.00157789	0.021081
FBgn0028670	0.752583	8.49754	23.4918	0.00157814	0.021081
FBgn0041780	2.07949	0.0199307	23.4748	0.00158147	0.021081
FBgn0004428	2.45505	4.86227	23.8865	0.00158209	0.021081
FBgn0032193	-0.559632	3.82402	23.4713	0.00158216	0.021081
FBgn0034863	-1.558	0.663251	23.4563	0.0015851	0.0210959
FBgn0035571	-1.26653	3.89721	23.4369	0.00158893	0.0211168
FBgn0001257	0.669729	5.8375	23.4298	0.00159032	0.0211168
FBgn0004237	-0.734192	7.32868	23.3712	0.00160196	0.0212407
FBgn0034697	0.395383	5.66793	23.3644	0.00160331	0.0212407
FBgn0038539	-1.28052	2.14326	23.353	0.0016056	0.0212466
FBgn0030186	-2.46729	1.09404	23.3343	0.00160933	0.0212704
FBgn0025814	1.28892	5.14567	23.3114	0.00161393	0.0212704
FBgn0011695	2.29511	4.95478	23.7151	0.00161524	0.0212704
FBgn0023513	0.50706	3.46563	23.301	0.00161602	0.0212704
FBgn0035806	-0.930011	4.15773	23.2872	0.00161881	0.0212704
FBgn0040305	0.671326	5.03286	23.2801	0.00162024	0.0212704
FBgn0266347	0.413923	4.23909	23.2727	0.00162175	0.0212704
FBgn0003339	-0.898661	4.14471	23.2711	0.00162207	0.0212704
FBgn0031263	0.677845	6.61004	23.2475	0.00162685	0.0212866
FBgn0015033	2.25911	4.39861	23.6368	0.00163068	0.0212866
FBgn0035942	-0.563715	3.74077	23.2246	0.00163152	0.0212866
FBgn0028473	0.505477	8.14347	23.2089	0.00163472	0.0212866
FBgn0085455	1.58742	3.44176	23.2064	0.00163523	0.0212866
FBgn0266228	-2.37267	-0.0817455	23.1538	0.00164604	0.0212866
FBgn0037370	-1.06738	7.13204	23.1248	0.00165204	0.0212866
FBgn0052150	-1.79741	0.435977	23.1226	0.0016525	0.0212866
FBgn0033337	0.628552	4.0905	23.1185	0.00165334	0.0212866
FBgn0053307	1.5589	4.75672	23.1099	0.00165513	0.0212866
FBgn0034139	-1.01178	1.95517	23.1097	0.00165518	0.0212866
FBgn0039927	0.48187	6.9413	23.1093	0.00165525	0.0212866
FBgn0259247	1.08818	6.90498	23.0926	0.00165873	0.0212866
FBgn0266710	-1.13738	1.98754	23.0836	0.00166061	0.0212866
FBgn0264489	0.972986	8.93819	23.0734	0.00166274	0.0212866
FBgn0263278	0.550514	3.72193	23.0726	0.00166289	0.0212866
FBgn0034365	0.816492	5.0746	23.0627	0.00166498	0.0212866
FBgn0004795	-0.611089	3.28746	23.0592	0.00166571	0.0212866
FBgn0004168	0.778463	2.0199	23.0458	0.00166853	0.0212866
FBgn0037672	0.890124	4.97385	23.0427	0.00166917	0.0212866
FBgn0262394	0.968666	1.31825	23.018	0.00167438	0.0212866
FBgn0052473	0.789226	7.12473	23.0116	0.00167571	0.0212866
FBgn0032405	-1.61941	4.70478	23.0061	0.00167689	0.0212866
FBgn0030187	1.92249	0.149963	23.0007	0.00167803	0.0212866
FBgn0036862	1.32329	7.22594	22.9961	0.001679	0.0212866
FBgn0038744	0.988007	3.13581	22.9911	0.00168005	0.0212866
FBgn0037275	1.27551	1.55481	22.9889	0.00168052	0.0212866
FBgn0039686	-2.39595	0.963964	22.9726	0.00168397	0.0212866
FBgn0001217	-1.08612	3.72955	22.9612	0.0016864	0.0212866
FBgn0028980	-0.670473	4.31737	22.9536	0.00168801	0.0212866
FBgn0266417	1.00942	5.06377	22.9522	0.00168832	0.0212866
FBgn0264816	-0.694179	3.56072	22.9424	0.00169041	0.0212866
FBgn0036752	0.971552	5.288	22.9404	0.00169083	0.0212866
FBgn0037707	-0.434089	4.03082	22.9374	0.00169147	0.0212866
FBgn0050043	1.40375	5.54125	22.9287	0.00169333	0.0212866
FBgn0031929	1.51873	5.57212	22.9255	0.00169402	0.0212866
FBgn0036546	-0.463692	4.40898	22.9253	0.00169406	0.0212866
FBgn0024245	-0.853923	4.14944	22.9191	0.00169538	0.0212866
FBgn0035265	1.89328	2.84362	22.9149	0.00169628	0.0212866
FBgn0039110	-0.526718	5.39152	22.9072	0.00169793	0.0212866
FBgn0003463	0.742287	5.76837	22.9042	0.00169859	0.0212866
FBgn0010300	-0.961869	8.60363	22.892	0.00170121	0.0212964
FBgn0028583	2.62267	2.16858	22.8215	0.00171645	0.021464
FBgn0036089	-1.50218	0.669734	22.8113	0.00171867	0.0214686
FBgn0038943	-2.85686	8.93611	23.1081	0.00172365	0.0214747
FBgn0030959	-0.635219	4.14531	22.7869	0.00172401	0.0214747
FBgn0036107	-0.714075	3.94326	22.7836	0.00172473	0.0214747
FBgn0035107	-0.528382	5.42736	22.773	0.00172706	0.0214747
FBgn0050088	-2.84305	0.861447	22.7668	0.00172842	0.0214747
FBgn0051973	1.97383	3.77807	22.7349	0.00173543	0.0215386
FBgn0032774	0.977817	7.20232	22.7236	0.00173794	0.0215467
FBgn0004368	0.667921	5.99103	22.6876	0.00174591	0.0216224
FBgn0010019	1.02607	7.95648	22.6738	0.00174898	0.0216373
FBgn0260753	1.55524	1.94066	22.6284	0.00175914	0.0217081
FBgn0022382	1.04402	7.03682	22.6236	0.00176023	0.0217081
FBgn0086451	0.427158	5.32693	22.6224	0.00176048	0.0217081
FBgn0042102	1.32333	4.64705	22.6127	0.00176266	0.0217081
FBgn0037520	2.03467	1.18353	22.6065	0.00176406	0.0217081
FBgn0051201	0.684675	4.61572	22.5871	0.00176844	0.021732
FBgn0036641	-0.501001	4.23343	22.5813	0.00176976	0.021732
FBgn0263023	-1.59148	1.86188	22.5638	0.00177373	0.0217577
FBgn0003515	1.65198	1.61581	22.5534	0.00177608	0.0217635
FBgn0045843	-1.41794	0.772067	22.5205	0.00178358	0.0218323
FBgn0034824	-1.44957	2.68413	22.5019	0.00178784	0.0218614
FBgn0050296	0.960402	5.63939	22.4754	0.00179392	0.0219127
FBgn0025837	1.96052	5.34258	22.7382	0.00179727	0.0219305
FBgn0262508	1.47322	7.70963	22.4283	0.00180481	0.0219994
FBgn0035709	-1.57017	2.76734	22.4089	0.0018093	0.0220309
FBgn0033129	1.14303	3.05713	22.3369	0.00182616	0.0221902
FBgn0265180	1.02256	8.36435	22.3367	0.00182621	0.0221902
FBgn0039507	0.567762	4.91813	22.3005	0.00183476	0.022258
FBgn0051406	-1.81466	1.98177	22.2968	0.00183563	0.022258
FBgn0025643	1.42802	7.81597	22.2887	0.00183755	0.022258
FBgn0030158	-1.62459	4.36103	22.2256	0.00185261	0.0224014
FBgn0053100	0.577596	5.6558	22.2147	0.00185522	0.0224014
FBgn0016031	-0.956376	5.91508	22.2034	0.00185795	0.0224014
FBgn0085485	2.03779	0.905294	22.1989	0.00185903	0.0224014
FBgn0001216	-1.45289	1.02806	22.1988	0.00185905	0.0224014
FBgn0003312	-0.733557	2.95676	22.1883	0.00186157	0.0224036
FBgn0034411	-1.29803	1.01472	22.1811	0.00186332	0.0224036
FBgn0035293	-1.38374	4.84792	22.174	0.00186504	0.0224036
FBgn0085376	-1.17168	5.31931	22.1501	0.00187082	0.0224101
FBgn0032482	0.472914	7.0584	22.1431	0.00187252	0.0224101
FBgn0042189	-1.23011	4.28039	22.1371	0.00187399	0.0224101
FBgn0036740	-0.731258	6.47786	22.1328	0.00187502	0.0224101
FBgn0003449	-0.444777	5.08602	22.1272	0.00187639	0.0224101
FBgn0032801	1.24213	3.03148	22.1177	0.00187872	0.0224101
FBgn0035626	-1.83361	0.901295	22.1149	0.00187939	0.0224101
FBgn0034251	-0.625032	2.83613	22.1082	0.00188104	0.0224101
FBgn0262598	-0.956498	2.44442	22.0926	0.00188485	0.0224217
FBgn0034858	-0.567841	5.101	22.0813	0.00188763	0.0224217
FBgn0038296	-0.689398	4.47533	22.0805	0.00188781	0.0224217
FBgn0034459	-1.36862	2.34969	22.0616	0.00189246	0.0224539
FBgn0016697	-0.573564	7.57364	22.0395	0.00189792	0.0224819
FBgn0031333	-1.34157	1.83475	22.0363	0.00189871	0.0224819
FBgn0030482	1.69172	6.07682	22.0048	0.00190653	0.0225516
FBgn0038679	0.755531	6.07188	21.9912	0.00190991	0.0225579
FBgn0029662	0.626613	4.34323	21.9841	0.00191168	0.0225579
FBgn0037615	-1.67884	0.531203	21.9719	0.00191474	0.0225579
FBgn0034876	-1.33392	6.17268	21.9714	0.00191486	0.0225579
FBgn0031913	-0.752443	8.45892	21.9505	0.00192009	0.0225688
FBgn0036437	-1.08503	3.48044	21.9504	0.00192012	0.0225688
FBgn0263762	-0.712913	7.26783	21.9444	0.00192162	0.0225688
FBgn0035649	1.34224	3.71874	21.9246	0.0019266	0.0226044
FBgn0039092	-1.73376	2.30648	21.896	0.00193382	0.0226288
FBgn0001224	-2.03981	11.5214	21.88	0.00193789	0.0226288
FBgn0036876	1.33946	3.41989	21.8707	0.00194024	0.0226288
FBgn0017561	2.03637	3.1557	21.8706	0.00194028	0.0226288
FBgn0032318	-1.06523	0.774116	21.8537	0.00194458	0.0226288
FBgn0037548	0.394325	5.21852	21.8181	0.00195369	0.0226288
FBgn0033798	-1.88396	1.28849	21.8168	0.00195403	0.0226288
FBgn0020513	-1.0545	9.00754	21.8159	0.00195426	0.0226288
FBgn0033115	1.25072	1.63601	21.8114	0.00195542	0.0226288
FBgn0031784	-1.25716	2.22729	21.8	0.00195833	0.0226288
FBgn0262993	-1.41262	2.05009	21.7994	0.0019585	0.0226288
FBgn0035094	1.28841	6.77637	21.7969	0.00195915	0.0226288
FBgn0264376	-1.64267	2.99678	21.7952	0.00195956	0.0226288
FBgn0031623	-1.33313	3.29463	21.7925	0.00196028	0.0226288
FBgn0013773	1.09647	2.73004	21.7879	0.00196146	0.0226288
FBgn0029507	0.825099	5.81175	21.7871	0.00196167	0.0226288
FBgn0044020	-0.527585	4.79773	21.7626	0.001968	0.0226288
FBgn0264273	-0.852711	6.15392	21.7536	0.00197031	0.0226288
FBgn0030347	0.988011	3.56163	21.7508	0.00197104	0.0226288
FBgn0037741	0.445258	3.58552	21.7451	0.00197253	0.0226288
FBgn0032706	1.03129	3.84783	21.7367	0.00197471	0.0226288
FBgn0036749	2.08608	2.05845	21.7352	0.00197511	0.0226288
FBgn0260004	1.03163	1.71965	21.7304	0.00197635	0.0226288
FBgn0030307	-1.02289	2.58633	21.7081	0.00198216	0.0226288
FBgn0033020	-1.37009	3.24791	21.6962	0.00198527	0.0226288
FBgn0036136	-0.605275	5.96985	21.6865	0.00198784	0.0226288
FBgn0261545	-1.18317	5.84325	21.6837	0.00198856	0.0226288
FBgn0032896	2.16922	0.410856	21.6645	0.00199359	0.0226288
FBgn0036391	1.42148	0.400208	21.6535	0.00199649	0.0226288
FBgn0029996	-0.698244	7.22162	21.6434	0.00199916	0.0226288
FBgn0033285	-1.34838	3.3988	21.6325	0.00200205	0.0226288
FBgn0051525	-1.17447	2.1238	21.6314	0.00200233	0.0226288
FBgn0036732	0.715762	7.12173	21.6302	0.00200266	0.0226288
FBgn0039078	-1.25651	4.19769	21.6203	0.00200527	0.0226288
FBgn0040392	-1.60952	1.33489	21.6123	0.00200741	0.0226288
FBgn0039196	-4.32019	0.105596	21.6087	0.00200836	0.0226288
FBgn0001269	-0.649742	4.01981	21.6073	0.00200873	0.0226288
FBgn0037472	-0.560248	5.68682	21.6035	0.00200976	0.0226288
FBgn0013765	-0.674215	6.12841	21.6011	0.00201039	0.0226288
FBgn0001089	-1.16086	6.24919	21.5949	0.00201204	0.0226288
FBgn0031534	-0.716754	6.97357	21.5912	0.00201301	0.0226288
FBgn0035084	1.37193	1.06984	21.5906	0.00201317	0.0226288
[truncated: 10,562 more rows]

## Sheet: All genes S–Gh vs. S+Gh T1
Differential expression analysis: Result of edgeR corresponding to the S–Gh vs. S+Gh comparision at T1 (24 hours post wasp attack). log2FC is reported
[truncated: 10,112 more rows]

[truncated: 5 more sheets: All genes S–W– vs. S–Gh T1, All genes S–W– vs. S+W– T2, All genes S–Lh vs. S+Lh T2, All genes S–W– vs. S–Gh T2, All genes S–Gh vs. S+Gh T2]
