# Supplementary material for: Differential gene expression in a tripartite interaction: Drosophila, Spiroplasma and parasitic wasps
Source: PeerJ. 2021 Mar 4;9:e11020. doi: 10.7717/peerj.11020 (PMC7937342; doi:10.7717/peerj.11020)
Supplement: Supplemental Information 10 — Different combinations of parameters were evaluated. The coverage value represents the range found in our data. The range of Biological coefficient of variation (BCV; estimated by edgeR) of our data was 0.3–0.4. [file peerj-09-11020-s010.xlsx]

## Sheet: Power Results
Table S1. Parameters used to run the simulations of the power analyses. Different combinations of parameters were evaluated. The coverage values used represent the range found in our data (see Table S2). The Biological coefficient of variation (BCV; estimated by edgeR) values of 0.3 and 0.4 because the BCVs from each pairwise comparison of treatments fell within this range.
Coverage	CV (Coefficient of variation)	Replicates	FC (Fold change)	alfa	Power
10X	0.3	4n	1.5	0.05	0.259638
10X	0.3	4n	2	0.05	0.613672
10X	0.3	4n	3	0.05	0.945688
10X	0.3	4n	4	0.05	0.994422
10X	0.3	3n	1.5	0.05	0.205907
10X	0.3	3n	2	0.05	0.495058
10X	0.3	3n	3	0.05	0.870101
10X	0.3	3n	4	0.05	0.973516
10X	0.4	4n	1.5	0.05	0.201744
10X	0.4	4n	2	0.05	0.485035
10X	0.4	4n	3	0.05	0.86149
10X	0.4	4n	4	0.05	0.97028
10X	0.4	3n	1.5	0.05	0.16205
10X	0.4	3n	2	0.05	0.383967
10X	0.4	3n	3	0.05	0.751373
10X	0.4	3n	4	0.05	0.914627
15X	0.3	4n	1.5	0.05	0.304585
15X	0.3	4n	2	0.05	0.697287
15X	0.3	4n	3	0.05	0.975311
15X	0.3	4n	4	0.05	0.99862
15X	0.3	3n	1.5	0.05	0.240297
15X	0.3	3n	2	0.05	0.573313
15X	0.3	3n	3	0.05	0.924986
15X	0.3	3n	4	0.05	0.990086
15X	0.4	4n	1.5	0.05	0.224959
15X	0.4	4n	2	0.05	0.539427
15X	0.4	4n	3	0.05	0.903781
15X	0.4	4n	4	0.05	0.984534
15X	0.4	3n	1.5	0.05	0.179594
15X	0.4	3n	2	0.05	0.42981
15X	0.4	3n	3	0.05	0.806808
15X	0.4	3n	4	0.05	0.94589
20X	0.3	4n	1.5	0.05	0.334526
20X	0.3	4n	2	0.05	0.745336
20X	0.3	4n	3	0.05	0.985825
20X	0.3	4n	4	0.05	0.99948
20X	0.3	3n	1.5	0.05	0.263443
20X	0.3	3n	2	0.05	0.621298
20X	0.3	3n	3	0.05	0.94909
20X	0.3	3n	4	0.05	0.995028
20X	0.4	4n	1.5	0.05	0.239264
20X	0.4	4n	2	0.05	0.571084
20X	0.4	4n	3	0.05	0.923703
20X	0.4	4n	4	0.05	0.989782
20X	0.4	3n	1.5	0.05	0.19043
20X	0.4	3n	2	0.05	0.457216
20X	0.4	3n	3	0.05	0.835518
20X	0.4	3n	4	0.05	0.959513
25X	0.3	4n	1.5	0.05	0.355841
25X	0.3	4n	2	0.05	0.776009
25X	0.3	4n	3	0.05	0.990592
25X	0.3	4n	4	0.05	0.999747
25X	0.3	3n	1.5	0.05	0.280059
25X	0.3	3n	2	0.05	0.653409
25X	0.3	3n	3	0.05	0.961789
25X	0.3	3n	4	0.05	0.997012
25X	0.4	4n	1.5	0.05	0.248958
25X	0.4	4n	2	0.05	0.591715
25X	0.4	4n	3	0.05	0.935006
25X	0.4	4n	4	0.05	0.992322
25X	0.4	3n	1.5	0.05	0.197787
25X	0.4	3n	2	0.05	0.4754
25X	0.4	3n	3	0.05	0.852844
25X	0.4	3n	4	0.05	0.966862
30x	0.3	4n	1.5	0.05	0.371765
30x	0.3	4n	2	0.05	0.797097
30x	0.3	4n	3	0.05	0.993132
30x	0.3	4n	4	0.05	0.999854
30x	0.3	3n	1.5	0.05	0.292556
30x	0.3	3n	2	0.05	0.676286
30x	0.3	3n	3	0.05	0.969353
30x	0.3	3n	4	0.05	0.997978
30x	0.4	4n	1.5	0.05	0.25596
30x	0.4	4n	2	0.05	0.606201
30x	0.4	4n	3	0.05	0.942203
30x	0.4	4n	4	0.05	0.99377
30x	0.4	3n	1.5	0.05	0.203108
30x	0.4	3n	2	0.05	0.488332
30x	0.4	3n	3	0.05	0.864365
30x	0.4	3n	4	0.05	0.971379
