# Supplementary material for: Differential gene expression in a tripartite interaction: Drosophila, Spiroplasma and parasitic wasps
Source: PeerJ. 2021 Mar 4;9:e11020. doi: 10.7717/peerj.11020 (PMC7937342; doi:10.7717/peerj.11020)
Supplement: Supplemental Information 11 — Numbers of read sequences mapped to D. melanogaster and Spiroplasma for each of our generated treatments. [file peerj-09-11020-s011.xlsx]

## Sheet: Sheet1
TableS2. Mapping statistics of all treatments with their replicates.
Treatment_Replicate_Time	Raw_reads	Trimmed Reads	Mapped reads to D. melanogaster	% Mapped reads to D. melanogaster	Library size edgeR competitive*	Library size edgeR non-competitive**	Reads mapped to S. poulsonii	Non-ribosomal S. poulsonii reads	% of sequences mapped to S. poulsonii	Reads Mapped to 18/28S rRNA of D. melanogaster	% Mapped reads to D. melanogaster ribosomal rRNA genes	Non-ribosomal Reads from D. melanogaster	Coverage value****
S–W–_1_T1	42595429	42493425	37563690	88.3988	28842957	28825418	N/A	N/A	N/A	6543137	0.174188	31020553	27.1159
S–W–_2_T1	41520733	41425247	35980077	86.8554	15958588	15953536	N/A	N/A	N/A	22784499	0.633253	13195578	11.5346
S–W–_3_T1	44538868	44426238	39055582	87.9111	26582084	26599014	N/A	N/A	N/A	10072700	0.257907	28982882	25.3347
S–W–_4_T1	42743301	42637445	38418228	90.1044	26967172	26971538	N/A	N/A	N/A	8540526	0.222304	29877702	26.1169
S–Lh_1_T1	50219285	50132335	44606688	88.9779	20320979	N/A	N/A	N/A	N/A	27035098	0.606077	17571590	15.3598
S–Lh_2_T1	46777565	46660720	43193994	92.5704	32542240	N/A	N/A	N/A	N/A	5488485	0.127066	37705509	32.9594
S–Lh_3_T1	45450039	45346082	42209318	93.0826	26859573	N/A	N/A	N/A	N/A	12178941	0.288537	30030377	26.2503
S–Lh_4_T1	45654887	45563587	41708318	91.5387	26383389	N/A	N/A	N/A	N/A	11538440	0.276646	30169878	26.3723
S–Gh_1_T1	43109136	42988153	39364284	91.5701	33787774	33787774	N/A	N/A	N/A	2093074	0.0531719	37271210	32.5797
S–Gh_2_T1	45438290	45315966	42148853	93.011	29990576	29990576	N/A	N/A	N/A	9111524	0.216175	33037329	28.8788
S–Gh_3_T1	39218514	39106923	35463792	90.6842	23980386	23980386	N/A	N/A	N/A	8944398	0.252212	26519394	23.1813
S–Gh_4_T1	39730710	39623852	36512674	92.1482	24682829	24682829	N/A	N/A	N/A	9075124	0.248547	27437550	23.9839
S+W–_1_T1	44979033	44869355	42706388	95.1794	34502728	N/A	22970	1390	0.0511931	4388573	0.102762	38317815	33.4946
S+W–_2_T1	48985233	48907169	44755384	91.5109	16767368	N/A	14799	3887	0.0302594	27877766	0.622892	16877618	14.7532
S+W–_3_T1	40330484	40213517	36775250	91.45	27882776	N/A	28093	3054	0.0698596	4520682	0.122927	32254568	28.1946
S+W–_4_T1	39752636	39653914	36938502	93.1522	23877856	N/A	26030	3171	0.065643	9870663	0.267219	27067839	23.6607
S+Lh_1_T1	34734099	34410258	31682817	92.0738	25922683	N/A	29927	2452	0.0869712	2465637	0.0778225	29217180	25.5395
S+Lh_2_T1	35006873	34737525	31404573	90.4053	22433595	N/A	37003	3475	0.106522	6436956	0.204969	24967617	21.8248
S+Lh_3_T1	44182198	43833688	40279705	91.8921	30834512	N/A	45713	3385	0.104287	4891813	0.121446	35387892	30.9335
S+Lh_4_T1	50981873	50708986	46193873	91.096	25148252	N/A	54172	17826	0.106829	18363272	0.397526	27830601	24.3274
S+Gh_1_T1	34494204	34203352	28941145	84.6149	24771774	24771774	37000	1080	0.108177	908505	0.0313915	28032640	24.5041
S+Gh_2_T1	44315364	44055217	40610989	92.182	31721648	31721648	34886	2406	0.079187	4524954	0.111422	36086035	31.5437
S+Gh_3_T1	39551966	39274399	36466269	92.85	28251653	28251653	34328	3081	0.0874055	4473827	0.122684	31992442	27.9654
S+Gh_4_T1	45509195	45255634	41266788	91.186	24939985	24939985	26746	1708	0.0590998	13334342	0.323125	27932446	24.4165
Treatment_Replicate_Time	Raw_reads	Trimmed Reads	Mapped reads to D. melanogaster	% Mapped reads to D. melanogaster	Library size edgeR competitive*	Library size edgeR non-competitive**	Reads mapped to S. poulsonii	Non-ribosomal S. poulsonii reads	% of sequences mapped to S. poulsonii	Reads Mapped to 18/28S rRNA of D. melanogaster	% Mapped reads to D. melanogaster ribosomal rRNA genes	Non-ribosomal Reads from D. melanogaster	Coverage value****
S–W–_1_T2	43829718	43734603	40867306	93.4439	26384242	26384567	N/A	N/A	N/A	10585302	0.259016	30282004	26.4703
S–W–_2_T2	45688416	45602440	41525362	91.0595	17138315	17137138	N/A	N/A	N/A	23378549	0.562994	18146813	15.8626
S–W–_3_T2	44242956	44158976	40681639	92.1254	16352515	16419354	N/A	N/A	N/A	23055865	0.566739	17625774	15.4071
S–W–_4_T2	43933458	43830968	40803517	93.0929	19681498	19675087	N/A	N/A	N/A	19176970	0.469983	21626547	18.9043
S–Lh_1_T2	47097166	47025984	42071350	89.4641	17102220	16822429	N/A	N/A	N/A	24275426	0.577006	17795924	15.5559
S–Lh_2_T2	49904203	49826647	45006413	90.326	17859359	17582267	N/A	N/A	N/A	26189335	0.581902	18817078	16.4485
S–Lh_3_T2	52861267	52775226	48136504	91.2104	23106181	22775176	N/A	N/A	N/A	23444187	0.487036	24692317	21.5842
S–Lh_4_T2***	40800964	40703349	37460796	92.0337	22718674	22371515	N/A	N/A	N/A	12576537	0.335725	24884259	21.752
S–Gh_1_T2	40158104	40049300	37493769	93.619	24784759	24784759	N/A	N/A	N/A	6631511	0.17687	30862258	26.9775
S–Gh_2_T2	41945886	41849401	39002842	93.1981	21754968	21754968	N/A	N/A	N/A	14454933	0.370612	24547909	21.458
S–Gh_3_T2	42781371	42678439	39184212	91.8127	20468616	20468616	N/A	N/A	N/A	17025818	0.434507	22158394	19.3692
S–Gh_4_T2	40680673	40600948	36844415	90.7477	14673508	14673508	N/A	N/A	N/A	21979637	0.596553	14864778	12.9937
S+W–_1_T2	44523649	44404701	41488982	93.4338	32827960	N/A	44936	9694	0.101196	5552005	0.133819	35936977	31.4134
S+W–_2_T2	53543487	53404513	49702946	93.0688	39577852	N/A	54777	11580	0.10257	5853226	0.117764	43849720	38.3302
S+W–_3_T2	43853051	43769095	39284310	89.7535	13732948	N/A	28131	8919	0.0642714	25956583	0.660737	13327727	11.6501
S+W–_4_T2	43903924	43815794	39910269	91.0865	19241066	N/A	36198	9263	0.082614	18348557	0.459745	21561712	18.8477
S+Lh_1_T2***	49164729	49006504	46646796	95.1849	40761978	N/A	80711	6485	0.164694	2098490	0.0449868	44548306	38.9408
S+Lh_2_T2	47708164	47612627	43068342	90.4557	14322149	N/A	20994	10383	0.0440933	29120859	0.676155	13947483	12.1919
S+Lh_3_T2	42604992	42512743	38960035	91.6432	16304346	N/A	19741	10072	0.0464355	21974346	0.564023	16985689	14.8476
S+Lh_4_T2	41562948	41483684	37039091	89.2859	10472056	N/A	15978	6513	0.0385163	29086527	0.785293	7952564	6.95154
S+Gh_1_T2	51832053	51750996	46815715	90.4634	18632656	18632656	16513	6433	0.0319086	27197997	0.580959	19617718	17.1484
S+Gh_2_T2	45604892	45511804	41670032	91.5587	21638337	21638337	29158	9575	0.0640669	15898824	0.381541	25771208	22.5273
S+Gh_3_T2	43724921	43637794	40204414	92.1321	18484687	18484687	26845	16557	0.0615178	21302866	0.529864	18901548	16.5223
S+Gh_4_T2	45874829	45772715	42163203	92.1143	19784194	19784194	26924	13070	0.0588211	21779971	0.516563	20383232	17.8175
* Competitive analyses were conducted as described in the Methods. Briefly, the total trimmed reads by replicate were aligned to an index consisting of the D. melanogaster genome plus the L. heterotoma genome
** Non-competitive analyses were generated by mapping total trimmed reads only to the D. melanogaster genome
*** Replicates that were removed from the subsequent analyses (see Main Text)
**** Coverage is the result of (Non ribosomal reads * 125 /143000000). 125 is the length (bases) of the Illumina reads and 143,000,000 = 143Mb, is our reference of the genome size of D. melanogaster
