# Supplementary material for: Differential gene expression in a tripartite interaction: Drosophila, Spiroplasma and parasitic wasps
Source: PeerJ. 2021 Mar 4;9:e11020. doi: 10.7717/peerj.11020 (PMC7937342; doi:10.7717/peerj.11020)
Supplement: Supplemental Information 12 — Number of adenines or other bases in the specific site of RIP attack in the following treatments: Spiroplasma-infected & L. heterotoma-exposed (S+Lh); Spiroplasma-infected & Ganaspis sp-exposed (S+Gh); Spiroplasma-free & L. heterotoma-exposed (S–Lh); and Spiroplasma-free & Ganaspis sp.-exposed (S–Gh).The two time points post-wasp attack (PWA) were evaluated: T1 = 24 h and T2 = 72 h. [file peerj-09-11020-s012.xlsx]

## Sheet: Hoja 1
Table S3. Values of depurination in the 28S rRNA sequences of L. heterotoma or Ganaspis sp. Number of adenines or other bases in the specific site of RIP attack in the presence of S. poulsonii-L. heterotoma (S+Lh), S. poulsonii--Ganaspis sp. (S+Gh) or in absence of S. poulsonii (S–Lh and S–Gh), respectively. The two time points post-wasp attack (PWA) were evaluated: T1=24h and T2=72h
Treatment	S. poulsonii infection	Number of replicate	Wasp	Total_sequences	Number of Adenines	Other bases diferent to adenine	Percentage of adenines	Time
S+Lh	Yes	1	L. heterotoma	7	6	1	85.7143	72_PWA
S+Lh	Yes	2	L. heterotoma	43	35	8	81.3953	72_PWA
S+Lh	Yes	3	L. heterotoma	16	12	4	75	72_PWA
S+Lh	Yes	4	L. heterotoma	329	285	44	86.6261	72_PWA
S–Lh	No	1	L. heterotoma	99	99	0	100	72_PWA
S–Lh	No	2	L. heterotoma	81	81	0	100	72_PWA
S–Lh	No	3	L. heterotoma	50	50	0	100	72_PWA
S–Lh	No	4	L. heterotoma	43	43	0	100	72_PWA
S+Gh	Yes	1	Ganaspis sp.	121	121	0	100	72_PWA
S+Gh	Yes	2	Ganaspis sp.	63	63	0	100	72_PWA
S+Gh	Yes	3	Ganaspis sp.	14	14	0	100	72_PWA
S+Gh	Yes	4	Ganaspis sp.	14	14	0	100	72_PWA
S–Gh	No	1	Ganaspis sp.	37	37	0	100	72_PWA
S–Gh	No	2	Ganaspis sp.	13	13	0	100	72_PWA
S–Gh	No	3	Ganaspis sp.	55	55	0	100	72_PWA
S–Gh	No	4	Ganaspis sp.	601	601	0	100	72_PWA
S+Lh	Yes	1	L. heterotoma	21	21	0	100	24_PWA
S+Lh	Yes	2	L. heterotoma	47	47	0	100	24_PWA
S+Lh	Yes	3	L. heterotoma	53	53	0	100	24_PWA
S+Lh	Yes	4	L. heterotoma	11	9	2	81.8182	24_PWA
S–Lh	No	1	L. heterotoma	2052	2051	1	100	24_PWA
S–Lh	No	2	L. heterotoma	69	69	0	100	24_PWA
S–Lh	No	3	L. heterotoma	397	397	0	100	24_PWA
S–Lh	No	4	L. heterotoma	106	106	0	100	24_PWA
S+Gh	Yes	1	Ganaspis sp.	7	7	0	100	24_PWA
S+Gh	Yes	2	Ganaspis sp.	13	13	0	100	24_PWA
S+Gh	Yes	3	Ganaspis sp.	13	13	0	100	24_PWA
S+Gh	Yes	4	Ganaspis sp.	6	6	0	100	24_PWA
S–Gh	No	1	Ganaspis sp.	88	88	0	100	24_PWA
S–Gh	No	2	Ganaspis sp.	235	235	0	100	24_PWA
S–Gh	No	3	Ganaspis sp.	92	92	0	100	24_PWA
S–Gh	No	4	Ganaspis sp.	56	56	0	100	24_PWA
