# Supplementary material for: Differential gene expression in a tripartite interaction: Drosophila, Spiroplasma and parasitic wasps
Source: PeerJ. 2021 Mar 4;9:e11020. doi: 10.7717/peerj.11020 (PMC7937342; doi:10.7717/peerj.11020)
Supplement: Supplemental Information 13 — Number of adenines or other bases in the specific site of RIP attack. Treatments are; Spiroplasma-infected and wasp-free (S+W–). Spiroplasma-free & wasp free (S–W–). The two time points post-wasp attack (PWA) were evaluated: T1 = 24 h and T2 = 72 h. [file peerj-09-11020-s013.xlsx]

## Sheet: Hoja 1
Table S4. Depurination in the 28S rRNA sequences of D. melanogaster. The number of adenines or other bases in the specific site of RIP attack in the presence of S. poulsonii (S+W–) or in absence of S. poulsonii (S–W–) is reported. The two time points post wasp attack (PWA) were evaluated: T1=24h and T2=72h.
Treatment	S. poulsonii infection	Wasp parasitism	Number of replicate	Total_sequences	Number of Adenines	Other bases(different to adenine)	Percentage	Time
S+W–	Yes	No	1	5872	5865	7	99.8808	24h
S+W–	Yes	No	2	1375	1370	5	99.6364	24h
S+W–	Yes	No	3	1952	1951	1	99.9488	24h
S+W–	Yes	No	4	5721	5713	8	99.8602	24h
S–W–	No	No	1	14443	14435	8	99.9446	24h
S–W–	No	No	2	18818	18795	23	99.8778	24h
S–W–	No	No	3	8444	8432	12	99.8579	24h
S–W–	No	No	4	10381	10371	10	99.9037	24h
S+W–	Yes	No	1	5438	5435	3	99.9448	72h
S+W–	Yes	No	2	3225	3220	5	99.845	72h
S+W–	Yes	No	3	1379	1377	2	99.855	72h
S+W–	Yes	No	4	2558	2553	5	99.8045	72h
S–W–	No	No	1	3081	3081	0	100	72h
S–W–	No	No	2	2502	2502	0	100	72h
S–W–	No	No	3	1429	1428	1	99.93	72h
S–W–	No	No	4	2156	2155	1	99.9536	72h
